# Supplementary material for: STAVER: A Standardized Benchmark Dataset-Based Algorithm for Effective Variation Reduction in Large-Scale DIA MS Data
Source: Research Square preprint supplement (doi:10.21203/rs.3.rs-3111384/v1), 2023-07-10
Supplement: Supplementary file 1 [file 1adf3c56023c7c023747a831.docx]

All the mass spectrometry proteomics and phosphoproteomic data were deposited in the ProteomeXchange Consortium (https://www.iproxorg/) via the iProX partner repository with the dataset identifier iProX accession: Proteome: IPX0006296000, with the following url: https://www.iprox.cn/page/PSV023.html;?url=16824283927944G1g, and password: 2ivG.

Moreover, the STAVER framework has been implemented as the "dia-staver" Python package, and is available for access at https://github.com/Ran485/STAVER.
