# Supplementary material for: STAVER: A Standardized Benchmark Dataset-Based Algorithm for Effective Variation Reduction in Large-Scale DIA MS Data
Source: Research Square preprint supplement (doi:10.21203/rs.3.rs-3111384/v1), 2023-07-10
Supplement: Supplementary file 2 [file 995b8e95168b2bfb488b6f60.xlsx]

## Sheet: Legend
Table S1 presents a comprehensive analysis of protein matrix information to evaluate the performance of the STAVER algorithm, as related to Figure 2.
The description includes the following key components:
1.327_Spectral_Library_Info. This sheet contains the information for 327 spectral library from different organ and body fluid.
2.327_Spectral_Summary. This sheet summary the information for 327 spectral library from different organ and body fluid.
3.Protein_Numbers. The quantity of proteins identified in both raw data and STAVER-processed data.
4.Protein_Matrix_ Rawdata. This sheet contains information of identified proteins in DIA-NN output raw results.
5.Protein_Matrix_ STAVER. This sheet contains information of identified proteins in DIA-NN output results processed by the STAVER algorithm.
6.Raw_Peptides. This sheet contains information of peptides identified in DIA-NN output raw results.
7.High_CI_Peptides_STAVER. This sheet contains data on peptides identified in DIA-NN output results processed by the STAVER algorithm.
8.Peptides_CV_Compare. The number and percentage share of peptide identifications for proteins in raw data and STAVER-processed data at a specific CV threshold, respectively.
9.Spearman_Correlation_Rawdata. The Spearman's rank correlation coefficient for raw data is 0.84 (IQR = 0.83-0.85).
10.Spearman_Correlation_STAVER. The Spearman's rank correlation coefficient for STAVER-processed data is 0.93 (IQR = 0.93-0.94).
11.Protein_CV_Compare. The coefficient of variation (CV) of proteins is compared between raw data and STAVER-processed data.
12.Protein_CV_Summary. The number and percentage share of protein identifications in raw data and STAVER-processed data at a specific CV threshold are presented, respectively.

## Sheet: 1.327_Spectral_Library_Info
sample	type
CRC_051865.speclib	Tumor
CRC_051867.speclib	Tumor
CRC_051868.speclib	Tumor
CRC_051870.speclib	Tumor
CRC_051872.speclib	Tumor
CRC_051888.speclib	Tumor
CRC_051890.speclib	Tumor
CRC_051908.speclib	Tumor
CRC_051926.speclib	Tumor
CRC_051931.speclib	Tumor
Colon_049134.speclib	Tumor
Colon_049135.speclib	Tumor
Colon_049136.speclib	Tumor
Colon_049761.speclib	Tumor
Colon_050740.speclib	Tumor
Colon_054408.speclib	Tumor
Colon_054411.speclib	Tumor
Colon_054415.speclib	Tumor
Colon_054417.speclib	Tumor
Colon_054418.speclib	Tumor
DLBCL_042894.speclib	Tumor
DLBCL_042895.speclib	Tumor
DLBCL_042896.speclib	Tumor
DLBCL_042897.speclib	Tumor
DLBCL_042898.speclib	Tumor
DLBCL_044764.speclib	Tumor
DLBCL_044767.speclib	Tumor
DLBCL_044772.speclib	Tumor
DLBCL_044773.speclib	Tumor
DLBCL_046495.speclib	Tumor
ESD2_050285.speclib	Tumor
ESD2_050291.speclib	Tumor
ESD2_050292.speclib	Tumor
ESD2_050298.speclib	Tumor
ESD2_050319.speclib	Tumor
ESD2_050321.speclib	Tumor
ESD2_055274.speclib	Tumor
ESD2_058683.speclib	Tumor
ESD2_058689.speclib	Tumor
ESD2_061350.speclib	Tumor
ESDN2_042925.speclib	Tumor
ESDN2_042941.speclib	Tumor
ESDN2_043565.speclib	Tumor
ESDN2_044375.speclib	Tumor
ESDN2_044377.speclib	Tumor
ESDN2_045834.speclib	Tumor
ESDN2_046204.speclib	Tumor
ESDN2_046401.speclib	Tumor
ESDN2_049728.speclib	Tumor
ESDN2_049729.speclib	Tumor
ESD_036775.speclib	Tumor
ESD_036776.speclib	Tumor
ESD_036777.speclib	Tumor
ESD_036779.speclib	Tumor
ESD_036781.speclib	Tumor
ESD_036828.speclib	Tumor
ESD_036847.speclib	Tumor
ESD_036850.speclib	Tumor
ESD_036891.speclib	Tumor
ESD_037832.speclib	Tumor
Esophageal_030923.speclib	Tumor
Esophageal_032411.speclib	Tumor
Esophageal_032540.speclib	Tumor
Esophageal_033837.speclib	Tumor
Esophageal_035422.speclib	Tumor
Esophageal_041009.speclib	Tumor
Esophageal_041011.speclib	Tumor
Esophageal_041025.speclib	Tumor
Esophageal_045685.speclib	Tumor
Esophageal_046342.speclib	Tumor
Exp033485_Plasma_kit_F1.speclib	Body fluid
Exp033485_Plasma_kit_F2.speclib	Body fluid
Exp033485_Plasma_kit_F3.speclib	Body fluid
Exp033485_Plasma_kit_F4.speclib	Body fluid
Exp033485_Plasma_kit_F5.speclib	Body fluid
Exp033485_Plasma_kit_F6.speclib	Body fluid
Exp033485_Plasma_kit_F7.speclib	Body fluid
Exp033485_Plasma_kit_F8.speclib	Body fluid
Exp033485_Plasma_kit_F9.speclib	Body fluid
Exp033487_serum_kit_F1.speclib	Body fluid
Exp033487_serum_kit_F2.speclib	Body fluid
Exp033487_serum_kit_F3.speclib	Body fluid
Exp033487_serum_kit_F4.speclib	Body fluid
Exp033487_serum_kit_F5.speclib	Body fluid
Exp033487_serum_kit_F6.speclib	Body fluid
Exp033487_serum_kit_F7.speclib	Body fluid
Exp033487_serum_kit_F8.speclib	Body fluid
Exp033487_serum_kit_F9.speclib	Body fluid
Exp034217_Plasma_kit_F1.speclib	Body fluid
Exp034217_Plasma_kit_F2.speclib	Body fluid
Exp034217_Plasma_kit_F3.speclib	Body fluid
Exp034217_Plasma_kit_F4.speclib	Body fluid
Exp034217_Plasma_kit_F5.speclib	Body fluid
Exp034217_Plasma_kit_F6.speclib	Body fluid
Exp034217_Plasma_kit_F7.speclib	Body fluid
Exp034217_Plasma_kit_F8.speclib	Body fluid
Exp034217_Plasma_kit_F9.speclib	Body fluid
Exp036316_Blood_KIT_F1.speclib	Body fluid
Exp036316_Blood_KIT_F10.speclib	Body fluid
Exp036316_Blood_KIT_F11.speclib	Body fluid
Exp036316_Blood_KIT_F12.speclib	Body fluid
Exp036316_Blood_KIT_F13.speclib	Body fluid
Exp036316_Blood_KIT_F14.speclib	Body fluid
Exp036316_Blood_KIT_F15.speclib	Body fluid
Exp036316_Blood_KIT_F16.speclib	Body fluid
Exp036316_Blood_KIT_F17.speclib	Body fluid
Exp036316_Blood_KIT_F18.speclib	Body fluid
Exp036316_Blood_KIT_F19.speclib	Body fluid
Exp036316_Blood_KIT_F2.speclib	Body fluid
Exp036316_Blood_KIT_F20.speclib	Body fluid
Exp036316_Blood_KIT_F21.speclib	Body fluid
Exp036316_Blood_KIT_F22.speclib	Body fluid
Exp036316_Blood_KIT_F23.speclib	Body fluid
Exp036316_Blood_KIT_F24.speclib	Body fluid
Exp036316_Blood_KIT_F25.speclib	Body fluid
Exp036316_Blood_KIT_F26.speclib	Body fluid
Exp036316_Blood_KIT_F27.speclib	Body fluid
Exp036316_Blood_KIT_F28.speclib	Body fluid
Exp036316_Blood_KIT_F3.speclib	Body fluid
Exp036316_Blood_KIT_F4.speclib	Body fluid
Exp036316_Blood_KIT_F5.speclib	Body fluid
Exp036316_Blood_KIT_F6.speclib	Body fluid
Exp036316_Blood_KIT_F7.speclib	Body fluid
Exp036316_Blood_KIT_F8.speclib	Body fluid
Exp036316_Blood_KIT_F9.speclib	Body fluid
Exp040890_TMJ_F1.speclib	Body fluid
Exp040890_TMJ_F10.speclib	Body fluid
Exp040890_TMJ_F11.speclib	Body fluid
Exp040890_TMJ_F12.speclib	Body fluid
Exp040890_TMJ_F13.speclib	Body fluid
Exp040890_TMJ_F14.speclib	Body fluid
Exp040890_TMJ_F15.speclib	Body fluid
Exp040890_TMJ_F16.speclib	Body fluid
Exp040890_TMJ_F2.speclib	Body fluid
Exp040890_TMJ_F3.speclib	Body fluid
Exp040890_TMJ_F4.speclib	Body fluid
Exp040890_TMJ_F5.speclib	Body fluid
Exp040890_TMJ_F6.speclib	Body fluid
Exp040890_TMJ_F7.speclib	Body fluid
Exp040890_TMJ_F8.speclib	Body fluid
Exp040890_TMJ_F9.speclib	Body fluid
Exp041749_IPF_F1.speclib	Body fluid
Exp041749_IPF_F10.speclib	Body fluid
Exp041749_IPF_F11.speclib	Body fluid
Exp041749_IPF_F12.speclib	Body fluid
Exp041749_IPF_F13.speclib	Body fluid
Exp041749_IPF_F14.speclib	Body fluid
Exp041749_IPF_F15.speclib	Body fluid
Exp041749_IPF_F2.speclib	Body fluid
Exp041749_IPF_F3.speclib	Body fluid
Exp041749_IPF_F4.speclib	Body fluid
Exp041749_IPF_F5.speclib	Body fluid
Exp041749_IPF_F6.speclib	Body fluid
Exp041749_IPF_F7.speclib	Body fluid
Exp041749_IPF_F9.speclib	Body fluid
Exp045703_Hydrotharox_F14.speclib	Body fluid
Exp045703_Hydrotharox_F15.speclib	Body fluid
Exp045703_Hydrotharox_F16.speclib	Body fluid
Exp045703_Hydrotharox_F17.speclib	Body fluid
Exp045703_Hydrotharox_F18.speclib	Body fluid
Exp045703_Hydrotharox_F19.speclib	Body fluid
Exp045703_Hydrotharox_F20.speclib	Body fluid
Exp056854_Bile_F1.speclib	Body fluid
Exp056854_Bile_F10.speclib	Body fluid
Exp056854_Bile_F11.speclib	Body fluid
Exp056854_Bile_F12.speclib	Body fluid
Exp056854_Bile_F2.speclib	Body fluid
Exp056854_Bile_F3.speclib	Body fluid
Exp056854_Bile_F4.speclib	Body fluid
Exp056854_Bile_F5.speclib	Body fluid
Exp056854_Bile_F6.speclib	Body fluid
Exp056854_Bile_F7.speclib	Body fluid
Exp056854_Bile_F8.speclib	Body fluid
Exp056854_Bile_F9.speclib	Body fluid
Exp064066_Ascites_F1.speclib	Body fluid
Exp064066_Ascites_F11.speclib	Body fluid
Exp064066_Ascites_F12.speclib	Body fluid
Exp064066_Ascites_F13.speclib	Body fluid
Exp064066_Ascites_F14.speclib	Body fluid
Exp064066_Ascites_F15.speclib	Body fluid
Exp064066_Ascites_F16.speclib	Body fluid
Exp064066_Ascites_F17.speclib	Body fluid
Exp064066_Ascites_F18.speclib	Body fluid
Exp064066_Ascites_F2.speclib	Body fluid
Exp064066_Ascites_F20.speclib	Body fluid
Exp064066_Ascites_F21.speclib	Body fluid
Exp064066_Ascites_F23.speclib	Body fluid
Exp064066_Ascites_F24.speclib	Body fluid
Exp064066_Ascites_F25.speclib	Body fluid
Exp064066_Ascites_F26.speclib	Body fluid
Exp064066_Ascites_F27.speclib	Body fluid
Exp064066_Ascites_F28.speclib	Body fluid
Exp064066_Ascites_F29.speclib	Body fluid
Exp064066_Ascites_F3.speclib	Body fluid
Exp064066_Ascites_F30.speclib	Body fluid
Exp064066_Ascites_F31.speclib	Body fluid
Exp064066_Ascites_F32.speclib	Body fluid
Exp064066_Ascites_F33.speclib	Body fluid
Exp064066_Ascites_F34.speclib	Body fluid
Exp064066_Ascites_F4.speclib	Body fluid
Exp064066_Ascites_F5.speclib	Body fluid
Exp064066_Ascites_F6.speclib	Body fluid
Exp064066_Ascites_F7.speclib	Body fluid
Exp064066_Ascites_F8.speclib	Body fluid
Exp064066_Ascites_F9.speclib	Body fluid
Exp064067_Cerebrospinal_F1.speclib	Body fluid
Exp064067_Cerebrospinal_F10.speclib	Body fluid
Exp064067_Cerebrospinal_F11.speclib	Body fluid
Exp064067_Cerebrospinal_F12.speclib	Body fluid
Exp064067_Cerebrospinal_F13.speclib	Body fluid
Exp064067_Cerebrospinal_F14.speclib	Body fluid
Exp064067_Cerebrospinal_F16.speclib	Body fluid
Exp064067_Cerebrospinal_F17.speclib	Body fluid
Exp064067_Cerebrospinal_F18.speclib	Body fluid
Exp064067_Cerebrospinal_F2.speclib	Body fluid
Exp064067_Cerebrospinal_F3.speclib	Body fluid
Exp064067_Cerebrospinal_F4.speclib	Body fluid
Exp064067_Cerebrospinal_F5.speclib	Body fluid
Exp064067_Cerebrospinal_F6.speclib	Body fluid
Exp064067_Cerebrospinal_F7.speclib	Body fluid
Exp064067_Cerebrospinal_F8.speclib	Body fluid
Exp064067_Cerebrospinal_F9.speclib	Body fluid
Exp064068_Urine_F1.speclib	Body fluid
Exp064068_Urine_F10.speclib	Body fluid
Exp064068_Urine_F11.speclib	Body fluid
Exp064068_Urine_F12.speclib	Body fluid
Exp064068_Urine_F13.speclib	Body fluid
Exp064068_Urine_F14.speclib	Body fluid
Exp064068_Urine_F15.speclib	Body fluid
Exp064068_Urine_F16.speclib	Body fluid
Exp064068_Urine_F17.speclib	Body fluid
Exp064068_Urine_F2.speclib	Body fluid
Exp064068_Urine_F3.speclib	Body fluid
Exp064068_Urine_F4.speclib	Body fluid
Exp064068_Urine_F5.speclib	Body fluid
Exp064068_Urine_F6.speclib	Body fluid
Exp064068_Urine_F7.speclib	Body fluid
Exp064068_Urine_F8.speclib	Body fluid
Exp064068_Urine_F9.speclib	Body fluid
Exp068451_SerumOne_F1.speclib	Body fluid
Exp068451_SerumOne_F2.speclib	Body fluid
Exp068451_SerumOne_F3.speclib	Body fluid
Exp068451_SerumOne_F4.speclib	Body fluid
Exp068451_SerumOne_F5.speclib	Body fluid
Exp068451_SerumOne_F6.speclib	Body fluid
Exp068451_SerumOne_F7.speclib	Body fluid
GBC_053051.speclib	Tumor
GBC_053055.speclib	Tumor
GBC_053056.speclib	Tumor
GBC_053057.speclib	Tumor
GBC_053058.speclib	Tumor
GBC_053059.speclib	Tumor
GBC_053061.speclib	Tumor
GBC_053230.speclib	Tumor
GBC_053233.speclib	Tumor
GBC_053236.speclib	Tumor
GC_033294.speclib	Tumor
GC_033296.speclib	Tumor
GC_034527.speclib	Tumor
GC_034528.speclib	Tumor
GC_034530.speclib	Tumor
GC_034531.speclib	Tumor
GC_034533.speclib	Tumor
GC_041347.speclib	Tumor
GC_041349.speclib	Tumor
GC_041353.speclib	Tumor
Glioma_033947.speclib	Tumor
Glioma_034628.speclib	Tumor
Glioma_036297.speclib	Tumor
Glioma_036311.speclib	Tumor
Glioma_040822.speclib	Tumor
Glioma_040841.speclib	Tumor
Glioma_040848.speclib	Tumor
Glioma_040858.speclib	Tumor
Glioma_047482.speclib	Tumor
Glioma_047485.speclib	Tumor
Kidney_034224.speclib	Tumor
Kidney_034441.speclib	Tumor
Kidney_034460.speclib	Tumor
Kidney_038550.speclib	Tumor
Kidney_038552.speclib	Tumor
Kidney_038553.speclib	Tumor
Kidney_038561.speclib	Tumor
Kidney_038576.speclib	Tumor
Kidney_038579.speclib	Tumor
Kidney_038620.speclib	Tumor
Lung_055948.speclib	Tumor
Lung_058662.speclib	Tumor
Lung_058665.speclib	Tumor
Lung_058670.speclib	Tumor
Lung_060594.speclib	Tumor
Lung_063896.speclib	Tumor
Lung_063921.speclib	Tumor
Lung_063922.speclib	Tumor
Lung_063923.speclib	Tumor
Lung_063926.speclib	Tumor
Lung_064626.speclib	Tumor
Neuroblastoma_035921.speclib	Tumor
Neuroblastoma_035922.speclib	Tumor
Neuroblastoma_035926.speclib	Tumor
Neuroblastoma_035930.speclib	Tumor
Neuroblastoma_035932.speclib	Tumor
Neuroblastoma_035934.speclib	Tumor
Neuroblastoma_035935.speclib	Tumor
Neuroblastoma_035937.speclib	Tumor
Neuroblastoma_036384.speclib	Tumor
Neuroblastoma_036386.speclib	Tumor
Pancreas_045157.speclib	Tumor
Pancreas_045164.speclib	Tumor
Pancreas_045843.speclib	Tumor
Pancreas_045848.speclib	Tumor
Pancreas_048082.speclib	Tumor
Pancreas_051602.speclib	Tumor
Pancreas_055665.speclib	Tumor
Pancreas_055666.speclib	Tumor
Pancreas_055668.speclib	Tumor
Pancreas_055669.speclib	Tumor
UC_061629.speclib	Tumor
UC_061630.speclib	Tumor
UC_062788.speclib	Tumor
UC_062796.speclib	Tumor
UC_063351.speclib	Tumor
UC_063378.speclib	Tumor
UC_063385.speclib	Tumor
UC_063387.speclib	Tumor
UC_063392.speclib	Tumor
UC_063394.speclib	Tumor

## Sheet: 2.327_Spectral_Summary
Organization Source	Spectral Numbers	Type
Plasma	46	Body fluid
Ascites	31	Body fluid
Cerebrospinal (CSF)	17	Body fluid
Urine	17	Body fluid
TMJ	16	Body fluid
Serum	16	Body fluid
IPF	14	Body fluid
Bile	12	Body fluid
Hydrotharox	7	Body fluid
ESD	30	Tumor
Lung	11	Tumor
CRC	10	Tumor
Colon	10	Tumor
DLBCL	10	Tumor
Esophageal	10	Tumor
GBC	10	Tumor
GC	10	Tumor
Glioma	10	Tumor
Kidney	10	Tumor
Neuroblastoma	10	Tumor
Pancreas	10	Tumor
UC	10	Tumor

## Sheet: 3.Protein_Numbers
Sample	Protein Numbers	Type
Exp000000_DingC_PooledQC_DIA_3_HFX5_10min_8cm_2per_20210617_F1_R1	1741	Raw data
Exp000000_DingC_PooledQC_DIA_8_HFX5_10min_8cm_2per_20210617_F1_R1	1815	Raw data
Exp000000_DingC_PooledQC_DIA_10_HFX5_10min_8cm_2per_20210617_F1_R1	1814	Raw data
Exp000000_DingC_PooledQC_DIA_16_HFX5_10min_8cm_2per_20210617_F1_R1	1822	Raw data
Exp000000_DingC_PooledQC_DIA_20_HFX5_10min_8cm_2per_20210617_F1_R1	1792	Raw data
Exp000000_DingC_PooledQC_DIA_5_HFX5_10min_8cm_2per_20210617_F1_R1	1794	Raw data
Exp000000_DingC_PooledQC_DIA_2_HFX5_10min_8cm_2per_20210617_F1_R1	1679	Raw data
Exp000000_DingC_PooledQC_DIA_9_HFX5_10min_8cm_2per_20210617_F1_R1	1793	Raw data
Exp000000_DingC_PooledQC_DIA_11_HFX5_10min_8cm_2per_20210617_F1_R1	1772	Raw data
Exp000000_DingC_PooledQC_DIA_17_HFX5_10min_8cm_2per_20210617_F1_R1	1815	Raw data
Exp000000_DingC_PooledQC_DIA_4_HFX5_10min_8cm_2per_20210617_F1_R1	1744	Raw data
Exp000000_DingC_PooledQC_DIA_1_HFX5_10min_8cm_2per_20210617_F1_R1	1798	Raw data
Exp000000_DingC_PooledQC_DIA_12_HFX5_10min_8cm_2per_20210617_F1_R1	1769	Raw data
Exp000000_DingC_PooledQC_DIA_19_HFX5_10min_8cm_2per_20210617_F1_R1	1810	Raw data
Exp000000_DingC_PooledQC_DIA_14_HFX5_10min_8cm_2per_20210617_F1_R1	1770	Raw data
Exp000000_DingC_PooledQC_DIA_7_HFX5_10min_8cm_2per_20210617_F1_R1	1808	Raw data
Exp000000_DingC_PooledQC_DIA_13_HFX5_10min_8cm_2per_20210617_F1_R1	1844	Raw data
Exp000000_DingC_PooledQC_DIA_18_HFX5_10min_8cm_2per_20210617_F1_R1	1707	Raw data
Exp000000_DingC_PooledQC_DIA_15_HFX5_10min_8cm_2per_20210617_F1_R1	1822	Raw data
Exp000000_DingC_PooledQC_DIA_6_HFX5_10min_8cm_2per_20210617_F1_R1	1817	Raw data
Exp000000_DingC_PooledQC_DIA_14_HFX5_10min_8cm_2per_20210617_F1_R1	1702	STAVER
Exp000000_DingC_PooledQC_DIA_9_HFX5_10min_8cm_2per_20210617_F1_R1	1774	STAVER
Exp000000_DingC_PooledQC_DIA_17_HFX5_10min_8cm_2per_20210617_F1_R1	1748	STAVER
Exp000000_DingC_PooledQC_DIA_3_HFX5_10min_8cm_2per_20210617_F1_R1	1709	STAVER
Exp000000_DingC_PooledQC_DIA_19_HFX5_10min_8cm_2per_20210617_F1_R1	1771	STAVER
Exp000000_DingC_PooledQC_DIA_7_HFX5_10min_8cm_2per_20210617_F1_R1	1796	STAVER
Exp000000_DingC_PooledQC_DIA_1_HFX5_10min_8cm_2per_20210617_F1_R1	1817	STAVER
Exp000000_DingC_PooledQC_DIA_5_HFX5_10min_8cm_2per_20210617_F1_R1	1740	STAVER
Exp000000_DingC_PooledQC_DIA_2_HFX5_10min_8cm_2per_20210617_F1_R1	1678	STAVER
Exp000000_DingC_PooledQC_DIA_4_HFX5_10min_8cm_2per_20210617_F1_R1	1732	STAVER
Exp000000_DingC_PooledQC_DIA_12_HFX5_10min_8cm_2per_20210617_F1_R1	1763	STAVER
Exp000000_DingC_PooledQC_DIA_11_HFX5_10min_8cm_2per_20210617_F1_R1	1764	STAVER
Exp000000_DingC_PooledQC_DIA_10_HFX5_10min_8cm_2per_20210617_F1_R1	1758	STAVER
Exp000000_DingC_PooledQC_DIA_20_HFX5_10min_8cm_2per_20210617_F1_R1	1822	STAVER
Exp000000_DingC_PooledQC_DIA_8_HFX5_10min_8cm_2per_20210617_F1_R1	1825	STAVER
Exp000000_DingC_PooledQC_DIA_13_HFX5_10min_8cm_2per_20210617_F1_R1	1781	STAVER
Exp000000_DingC_PooledQC_DIA_16_HFX5_10min_8cm_2per_20210617_F1_R1	1806	STAVER
Exp000000_DingC_PooledQC_DIA_6_HFX5_10min_8cm_2per_20210617_F1_R1	1765	STAVER
Exp000000_DingC_PooledQC_DIA_18_HFX5_10min_8cm_2per_20210617_F1_R1	1716	STAVER
Exp000000_DingC_PooledQC_DIA_15_HFX5_10min_8cm_2per_20210617_F1_R1	1810	STAVER

## Sheet: 4.Protein_Matrix_ Rawdata
Symbol	Exp000000_DingC_PooledQC_DIA_3_HFX5_10min_8cm_2per_20210617_F1_R1	Exp000000_DingC_PooledQC_DIA_8_HFX5_10min_8cm_2per_20210617_F1_R1	Exp000000_DingC_PooledQC_DIA_10_HFX5_10min_8cm_2per_20210617_F1_R1	Exp000000_DingC_PooledQC_DIA_16_HFX5_10min_8cm_2per_20210617_F1_R1	Exp000000_DingC_PooledQC_DIA_20_HFX5_10min_8cm_2per_20210617_F1_R1	Exp000000_DingC_PooledQC_DIA_5_HFX5_10min_8cm_2per_20210617_F1_R1	Exp000000_DingC_PooledQC_DIA_2_HFX5_10min_8cm_2per_20210617_F1_R1	Exp000000_DingC_PooledQC_DIA_9_HFX5_10min_8cm_2per_20210617_F1_R1	Exp000000_DingC_PooledQC_DIA_11_HFX5_10min_8cm_2per_20210617_F1_R1	Exp000000_DingC_PooledQC_DIA_17_HFX5_10min_8cm_2per_20210617_F1_R1	Exp000000_DingC_PooledQC_DIA_4_HFX5_10min_8cm_2per_20210617_F1_R1	Exp000000_DingC_PooledQC_DIA_1_HFX5_10min_8cm_2per_20210617_F1_R1	Exp000000_DingC_PooledQC_DIA_12_HFX5_10min_8cm_2per_20210617_F1_R1	Exp000000_DingC_PooledQC_DIA_19_HFX5_10min_8cm_2per_20210617_F1_R1	Exp000000_DingC_PooledQC_DIA_14_HFX5_10min_8cm_2per_20210617_F1_R1	Exp000000_DingC_PooledQC_DIA_7_HFX5_10min_8cm_2per_20210617_F1_R1	Exp000000_DingC_PooledQC_DIA_13_HFX5_10min_8cm_2per_20210617_F1_R1	Exp000000_DingC_PooledQC_DIA_18_HFX5_10min_8cm_2per_20210617_F1_R1	Exp000000_DingC_PooledQC_DIA_15_HFX5_10min_8cm_2per_20210617_F1_R1	Exp000000_DingC_PooledQC_DIA_6_HFX5_10min_8cm_2per_20210617_F1_R1
A1BG	1.30907e+08	1.46589e+08	1.69111e+08	1.49739e+08	1.15064e+08	1.46003e+08	1.47362e+08	1.3263e+08	1.53262e+08	1.58834e+08	1.38982e+08	1.43066e+08	1.30532e+08	1.3142e+08	1.51525e+08	1.42693e+08	1.30426e+08	1.663e+08	1.35445e+08	1.39263e+08
A2M	2.90581e+09	3.44889e+09	3.34054e+09	3.29712e+09	3.1226e+09	2.93518e+09	2.99912e+09	3.32855e+09	3.2539e+09	3.52771e+09	3.26335e+09	2.83692e+09	3.13515e+09	3.49881e+09	3.39534e+09	3.13587e+09	2.91039e+09	3.52092e+09	2.93143e+09	3.20238e+09
A2ML1	12327000	13123025	19723120	17000800	11258900	10877860	1.22559e+07	14834680	18857160	9589990	17611425	17464700	1.49918e+07	18129900	20419950	13046675	4.575e+06	18347850	14313750	11954100
AARS1	1.12331e+07	14559180		23010600	9034800	20649808	21338200		19161200	25923850	15619977	15759550	1.10809e+07	2.762e+07	16504130	24202360	25666382	17890720	23401925	5492550
AARSD1	762479			526556	180750	565615		510032					558301	535607		622292				607301
ABCC2	2.36424e+06	2525205	3.02384e+06	543750	1881980	3.42294e+06	1104656	761026	790178	1.25293e+06	2.08523e+06	2814318	982320	1055760	799362	1046207	3.03404e+06	2.07188e+06	1.32607e+06	2.08199e+06
ABCC3	4404145									10168494	0	7454214
ABCC4	5.11427e+06		430376	600615		116940				506287	5082050	153387	913674	1095890	2411610		277024			159658
ABCF1	237876				376437							268528				542846
ABI3BP	2.28194e+06	5.45172e+06	3.15135e+06	2.19e+06	2.94104e+06	1164921	2.31753e+06	5.19615e+06	3871375	4.9003e+06	3.7595e+06	3304893	4.55502e+06	4.5044e+06	3.23426e+06	3.05068e+06	3.29246e+06	3.49638e+06	4.31101e+06	2.80173e+06
ACAA2	20035075	2.38396e+06	407396	5370920	652770			244416	1138330	5.47177e+06	1.57993e+07	1.00495e+07	5.5077e+06	19571400	18971670	3.10185e+06	5.49741e+06		1870720	3705560
ACACA	1.63874e+06	1.80669e+06	1.94809e+06	1.94192e+06	1.91177e+06	1.70166e+06	1.60359e+06	1.97232e+06	1.83422e+06	1.99882e+06	1.50561e+06	1.34465e+06	1.72815e+06	1.8485e+06	2.04324e+06	1.77766e+06	1.81587e+06	1.92254e+06	2.02454e+06	1.88055e+06
ACACB	1.63874e+06	1.80669e+06	1.94809e+06	1.94192e+06	1.91177e+06	1.70166e+06	1.60359e+06	1.97232e+06	1.83422e+06	1.99882e+06	1.50561e+06	1.34465e+06	1.72815e+06	1.8485e+06	2.04324e+06	1.77766e+06	1.81587e+06	1.92254e+06	2.02454e+06	1.88055e+06
ACAD10	991946	1025881		888235	1.03838e+06		850182	859290		701507			961756	599639		916810			0
ACADM	102560
ACAN	1.13284e+07	8247950	2732210	9374550	4703875	12525115	1.14232e+07	28227850	7087840	2.07147e+06	5256760	4254400		11015600	3.53803e+06	0		10485385	5230040	8337500
ACE	453687	802748	1.22672e+06	452711	1.22281e+06	748521	677962	674692	919546	661714	723685	711555	586403	703124	959355	643837	1079007	694989	305276	797481
ACE2	2.9909e+06	1.93894e+06	3.77226e+06	4736187	3.22831e+06	2.3665e+06	2114360	1.37492e+06	2.50814e+06	2045843	2786985	3937353	2.16548e+06	2.90022e+06	4.28452e+06	2.80022e+06	2474640	6.64055e+06	2803370	949459
ACIN1	4.28146e+06	7.99447e+06	8.49101e+06	18478290	6824692	4.80531e+06	9066174	3.02284e+06	6.18915e+06	8.3726e+06	4.57399e+06	5.17164e+06	2.29004e+06	6130891	4.3064e+06	4.56805e+06	6.75876e+06	20363600		4499486
ACLY	1.05038e+06	1.30959e+07	4.09657e+06	2.95606e+06	1.14361e+07			1.19479e+07	1.10326e+07	94865	14474500	229266		2.85154e+06	2408235	8110142	3692274	24543095	1.03282e+07	20192450
ACO1	1791225				543480						677199			936928						656820
ACO2	1.26016e+06	9.97652e+06	605138	4771292	706168	427973	3.1727e+06	2.53076e+06	525195	542576	486459	1.49562e+07	1153974	369347	1.01508e+07	1.46718e+06		590056	430157	7529025
ACOX3	1.05619e+06		992811	967305	663724								0					1.57718e+06	1128595	1007439
ACSL4	44555700	5388340	8.70285e+06	37713200			5473896	3.47161e+07	9060915			7986470	6939200			8.47939e+06	24625471	5489244	8579900
ACTA1	7.98992e+06	8.93534e+06	1.14953e+07	9.81796e+06	1.11649e+07	9.03525e+06	9.14827e+06	9.32764e+06	1.10541e+07	1.06292e+07	1.16156e+07	8.36714e+06	1.10978e+07	9.20864e+06	9.91698e+06	9.28018e+06	9.24562e+06	8.49367e+06	1.02686e+07	1.07349e+07
ACTA2	7.78671e+06	8.63061e+06	1.09423e+07	8.50762e+06	8.30299e+06	7.95079e+06	7.91615e+06	8.87687e+06	1.01735e+07	1.0875e+07	1.02053e+07	8.08968e+06	1.10376e+07	8.82138e+06	9.59464e+06	8.92987e+06	8.94924e+06	7.86463e+06	9.56627e+06	8.93919e+06
ACTB	1.33539e+07	1.80947e+07	1.82177e+07	1.20056e+07	1.33792e+07	1.60613e+07	1.14683e+07	1.24844e+07	1.53997e+07	1.66581e+07	1.60873e+07	1.36178e+07	1.56213e+07	1.33383e+07	1.62653e+07	1.33575e+07	1.31059e+07	1.31543e+07	1.38896e+07	1.51779e+07
ACTBL2	7.82312e+06	7.8845e+06	1.00937e+07	7.64112e+06	8.20747e+06	9.15559e+06	7.32374e+06	8.53484e+06	1.04638e+07	1.00095e+07	9.90448e+06	7.82276e+06	1.02912e+07	9.59543e+06	9.17141e+06	9.25521e+06	8.19735e+06	8.51159e+06	9.24173e+06	9.67389e+06
ACTC1	7.81557e+06	8.98238e+06	1.09813e+07	8.55201e+06	9.1165e+06	7.98014e+06	7.94591e+06	8.92917e+06	1.02137e+07	1.09165e+07	1.02365e+07	8.08968e+06	1.10724e+07	8.86489e+06	9.92681e+06	8.96169e+06	8.9974e+06	7.91389e+06	9.5975e+06	8.97611e+06
ACTG1	1.33539e+07	1.80947e+07	1.82177e+07	1.20056e+07	1.33792e+07	1.60613e+07	1.14683e+07	1.24844e+07	1.53997e+07	1.66581e+07	1.60873e+07	1.36178e+07	1.56213e+07	1.33383e+07	1.62653e+07	1.33575e+07	1.31059e+07	1.31543e+07	1.38896e+07	1.51779e+07
ACTG2	7.78671e+06	8.63061e+06	1.09423e+07	8.50762e+06	8.30299e+06	7.95079e+06	7.91615e+06	8.87687e+06	1.01735e+07	1.0875e+07	1.02053e+07	8.08968e+06	1.10376e+07	8.82138e+06	9.59464e+06	8.92987e+06	8.94924e+06	7.86463e+06	9.56627e+06	8.93919e+06
ACTN1	5.40619e+06	1.23119e+07	6.39456e+06	4.96988e+06	1.34035e+07	9.83347e+06	6.16838e+06	8.91463e+06	3.99218e+06	1.38178e+07	1.37992e+07	6.90829e+06	1.74407e+06	1.39852e+07	5.33952e+06	1.26373e+06	3.94593e+06	3.36454e+06	5.82967e+06	8.58752e+06
ACTN2	11953.3	300235			1.4537e+06	192938	81916.2	34172	11525.2	3.91673e+06	5.86582e+06	122798			23155.5	385229	1.24226e+06	14494.3		136308
ACTN4	1.62771e+07	2.17631e+07	3.08011e+07	2.88969e+07	1.7752e+07	6.62226e+07	2.33011e+07	4.05691e+07	1.03888e+07	2.95023e+07	3.86296e+07	3.37003e+07	2.8029e+07	3.44485e+07	2.12122e+07	4.15297e+07	1.57749e+07	3.77305e+07	1.69873e+07	1.40764e+08
ACTR1A	1.26906e+06		1840960		2374590	281768	1428900	861400	815270	1009810			14577050	1143795	1229092			0
ACTR2	579696		1.69963e+06	1.5402e+06		874040					502763	2.21668e+06	83989		3209641	994517	1104000	386067	592683
ACTR3	34480.1	45360.1	64569.9		45472.5		64360		13552.1	45631.4		45412.3	17409.2			4.81102e+06			221633
ACTR3B	34480.1	45360.1	64569.9		45472.5		64360		13552.1	45631.4		45412.3	17409.2			34787.2
ACTR3C	34480.1	45360.1	64569.9		45472.5		64360		13552.1	45631.4		45412.3	17409.2			34787.2
ADAM10	233186500		1949612	22170.2	557327000		422886750		409496500	23949350		195877100	522480000	281173500	198983525		281311605		564097500
ADAM9	3951380		2794155	6286540	905695	1757240		4117880	1914005		4119345	2498120	804835			4320430				3760270
ADAMTS13	777805	1.07105e+06	750617	1.57735e+06	1.53925e+06	947902	1.26629e+06	1324270	1.31046e+06	1.73505e+06	617606	951616	1.09868e+06	1763640	1115790	669750	1.57524e+06	1.44018e+06	1.12132e+06	1.47162e+06
ADD2	288902	827058		967380		744120	492968	713589	535583	5.18297e+06					685035	567558	830360			865671
ADGRB3	1100752	364436			1152390	1123390	1174940	390613	1315360	0		1.13469e+06	1134950	1027450	1254460	1.08633e+06	563590	1400300	446374	1.01766e+06
ADH1A	1.73265e+06	1.18349e+07	7.29301e+06	4.28992e+06	1.24345e+07	8.60348e+06	9.71821e+06	5.6337e+06	6.66577e+06	9.2983e+06	6.6123e+06	3.81603e+06	1.14457e+07	6.56359e+06	1.08946e+07	6.99167e+06	3.20414e+06	8.82664e+06	8.9417e+06	6.70113e+06
ADH1B	7.71954e+06	1.63985e+07	7.29301e+06	7.78573e+06	1.24345e+07	8.60348e+06	1.66482e+07	5.6337e+06	8.53004e+06	1.03304e+07	1.45216e+07	9.86476e+06	1.7786e+07	1.45786e+07	1.08946e+07	1.43972e+07	6.49651e+06	8.82664e+06	1.1158e+07	6.70113e+06
ADH5	448089		481264	561797		4.55722e+06				7632305		2333590				2602356	6244440	4191360	1876200	2.15349e+06
ADIPOQ	5.53534e+06	3.21951e+06	3.77082e+06	5.70361e+06	2.02179e+06	2.0598e+06	2.00152e+06	2.65176e+06	2.77289e+06	2.31523e+06	2.75717e+06	1.79314e+06	1.92374e+06	2.46584e+06	3.05533e+06	2.06299e+06	2.55486e+06	2.94603e+06	4.73386e+06	5.5037e+06
ADSL	47698203	4.90589e+07	6.57616e+07	19731450	4.72098e+07	6.17495e+07	26357900	1.14997e+07	5.79955e+07	5.56567e+07	3.92019e+07	5.41291e+07	6.26527e+07	7.18284e+07	5.73029e+07	44514387	5.39406e+07	4.59166e+07	4.60155e+07	26622040
AFDN	14035670		2.36952e+07		23834500	1.21617e+08		20636634	1.42925e+07	2.55457e+07	2.09534e+07	2.96588e+07	19973600	2.04056e+07	13001515	2.81329e+07	380333	1.51494e+07		2.33506e+07
AFM	1.17973e+08	9.50172e+07	1.08465e+08	1.62883e+08	1.31733e+08	1.30253e+08	1.42991e+08	1.25649e+08	1.45013e+08	1.49198e+08	8.69161e+07	1.28676e+08	1.21143e+08	1.14571e+08	1.21802e+08	1.49314e+08	1.06681e+08	1.16221e+08	1.27131e+08	1.04589e+08
AGA	56678				270248
AGL	125005	101520	2308788	2270890	0	1153170		2.95789e+06	1706857	487155		4.37439e+06	1.45415e+06		37721.3	3.09659e+06	2.49339e+06	2.18238e+06	3.05949e+06	5.73599e+06
AGPS	107817			3.60919e+06	1.27128e+07		1.45094e+06	610638		400704		196336	423078	664177	447325	409496	2645154	536253	313586	527524
AGT	2.80323e+08	2.29016e+08	3.81322e+08	6.01288e+08	3.31909e+08	2.88067e+08	2.75996e+08	2.87996e+08	2.41801e+08	3.21851e+08	4.03541e+08	5.73461e+08	2.07314e+08	2.62957e+08	4.17206e+08	2.32018e+08	7.01315e+08	5.18136e+08	2.83616e+08	5.31824e+08
AHCY	927915		192615	221590	3225562	2.38132e+06		1878825	167921	484805		1.07914e+06	330030		1.4597e+06	334902	1.7236e+06		1.19113e+06	1390218
AHCYL1	56519.8		262860		472670	55976.9	68086.5	834858				1184150	80433.2	186917000	352727	0	837314		49575.8
AHCYL2	56519.8					55976.9	68086.5						80433.2			0			49575.8
AHNAK	7.12664e+06	6.62974e+06	1.01092e+07	1.33798e+07	8.27669e+06	3.0042e+06	5.28816e+06	1.02247e+08	1.21409e+07	6.55591e+06	8.02635e+06	7.67968e+06	4.04175e+06	6.82616e+06	8.96256e+06	4.56819e+06	6.08966e+06	8.33879e+07	3.24689e+06	1.62877e+06
AHNAK2	1.60502e+07	13396745	16328300	9976500		10433189		7.32926e+06	9083020	2587620	4856665	1.27236e+07	11168025	5720298	7226715	7.77961e+06	9138640	5540475	1.50286e+07	4.35586e+06
AHR	2.0464e+06	3.22132e+06	2.94316e+06	3.60057e+06	3.11453e+06	3.30563e+06	1.82985e+06	3.43753e+06	2.8785e+06	3.7162e+06	3.16386e+06	3.25567e+06	3.4538e+06	3.82574e+06	3.36445e+06	2.77496e+06	2.84439e+06	4.65317e+06	2.83128e+06	3.19616e+06
AHSG	1.83776e+08	2.52636e+08	2.63808e+08	2.46049e+08	2.5084e+08	1.90399e+08	2.4959e+08	2.45061e+08	2.54639e+08	2.60737e+08	2.48864e+08	2.30354e+08	6.32634e+08	2.92098e+08	2.74179e+08	2.35615e+08	2.52963e+08	2.17619e+08	2.15345e+08	2.66936e+08
AK2	1.83726e+06	1.72928e+06	3.18209e+06	1998944	2.79842e+06	3.11451e+06	2.58514e+06	827985	3562295		1.34795e+06	3758430		4.20144e+06			2.5299e+06	2113585		161737
AKAP17A	749815	1657978	1360410		1.94699e+06	2141080		2124560	1.84468e+06	2170644	1.49909e+06		1973725	1.56099e+06	2260140		2163820		1970240
AKR1A1	249384		281860	3.15579e+08	214863670		228059219	405340		386792		4.59907e+08		4.57282e+08		433481000	391125		383840	387333
AKR1B1	1.30883e+07	1.32117e+07	20476500	20852900	17741900	20936400	23158300	21036100	19900900	2.64767e+07	2.42505e+07	21957200	18933800	18935800	2.78131e+07	20819500	14501850	21550200	18864700	22791240
AKR1C3	1.54723e+06						1.21314e+06		1.45628e+06					2757480				1.79424e+06		1.87605e+06
AKR1C4	511973	308829	290169	355598			385746	330660	335599	145560	503124		594678	376990	43344.8	273037	375229	458549		377259
AKR7A3	31197925		653153	53275500	3.26348e+07	59270500		3.52046e+07	3.55477e+07		27816500	28077100	38831625	3.07556e+07	4.36167e+07		36730000	3.24375e+07	48538375
AKR7L	31197925		653153	53275500	3.26348e+07	59270500		3.52046e+07	3.55477e+07		27816500	28077100	38831625	3.07556e+07	4.35486e+07		36730000	3.24375e+07	48538375
AKT1	1157620		2632400	3.7114e+06			1873685			3.997e+06	843496	1.22626e+07	3289005	3.33202e+06	1746220		2733565	2172785	3.33654e+06	4.05884e+06
ALB	5.47155e+10	5.94599e+10	6.60834e+10	5.98549e+10	6.26726e+10	6.14536e+10	6.11343e+10	6.22334e+10	6.51257e+10	6.3795e+10	6.09906e+10	5.96543e+10	5.87885e+10	6.36636e+10	6.49754e+10	6.04432e+10	6.27137e+10	6.3866e+10	5.89939e+10	6.48319e+10
ALDH1A1	2.53233e+06	4127720	5090700	2.64272e+06	654448	2.28822e+06	4504535	2.27256e+06	0	3.48733e+07	3.11607e+06	4528372	3769216	3.26355e+06	1554428	2715428	4132300	3.20675e+07	3.45291e+06	4.60098e+06
ALDH1A2	2.53233e+06	4127720	5090700	2.64272e+06		1.37695e+06	3368865	2.27256e+06	0	2.82095e+06	3.11607e+06	4528372	3769216	3.26355e+06	1554428	2715428	4132300	2.71866e+06	3196058	4559960
ALDH1A3	2.53233e+06	4127720	5090700	2.64272e+06		1.37695e+06	3368865	2.27256e+06	0	3.28157e+06	3.11607e+06	4528372	3769216	3.26355e+06	1554428	2715428	4132300	2.71866e+06	3196058	4559960
ALDH1B1	2.53233e+06	8.64876e+06	5090700	2.64272e+06		1.37695e+06	3.47175e+06	2.27256e+06	0	9.7192e+06	3.11607e+06	4528372	3769216	3.26355e+06	4943738	2715428	4132300	4.12473e+06	3196058	11844360
ALDH2	2.53233e+06	4613009	5090700	2.78314e+06		1.3919e+07	3368865	2.27256e+06	314736	2.82095e+06	3.38754e+06	4528372	5024616	3.26355e+06	1554428	2715428	4132300	3.82893e+06	4283178	4559960
ALDH4A1	28564100
ALDH7A1	13129300	1.54676e+07	6307100	6.67774e+06	8237275		9.26722e+06	7417460	9034750	5029832	3459590	1.25483e+07	8162150	5.89399e+06	9.95243e+06		10196475		15612200	5590600
ALDH9A1	35059350		78400700		35464600	0		48263360	2108235	78350550		54685850	77224600			69552100	8.05227e+07	5.09202e+07	4.639e+07	36054900
ALDOA	1.05955e+06	1.57359e+07	5.36238e+06	2418120	2.05296e+07	1.92656e+07	8.82796e+06	2.53406e+07	7.30912e+06	2.92888e+06	458279	9.36061e+06	1.03316e+07	450408	7.98561e+06	1.76189e+07	2.21748e+07	1.22027e+07	9.48037e+06	8.12064e+06
ALDOB	314766	1.52909e+06	2.62994e+06	1435775	56823.5	4.25281e+06	2.2484e+06	2.58497e+06	2.7821e+06	1.28784e+06	1763495	1.51949e+06	3266320	913644	1814758	179909	2953935	2.07347e+06	877324
ALG2	7487730					22595050			6272280						0	3494740	1.29241e+07
ALOX5	92682000	13527150	8.07853e+06	13112350		11391278	7959550	5621000	8.46718e+06	12980700	8287250	0	9.95216e+06	12254405	9.9486e+06		17152350	1.17929e+07		16771600
AMBP	6.53217e+07	1.42635e+08	8.11758e+07	7.88859e+07	6.55564e+07	6.0505e+07	7.26996e+07	1.05497e+08	8.09048e+07	1.20682e+08	1.10595e+08	5.95043e+07	6.28718e+07	7.71324e+07	6.90313e+07	9.7606e+07	9.39679e+07	7.43864e+07	6.09956e+07	7.03253e+07
AMPD2	128291		197109								2.01256e+06
AMPD3	2.38463e+06	3.64555e+06	2780455	3.50746e+06	4920820	1115990	2487095	0	3.48902e+06	3.99992e+06	1.99257e+06	3.31208e+06	4201900	2724350	2373520	2.58813e+06	3266880		3.88985e+06	2.48061e+06
ANG	876610	4.32495e+07	5.74644e+07	2.32808e+07	29086810	1.96487e+07	0	5.23063e+07	33620860		33263000	23410600	3.33228e+07		38916470	29328048	3.17632e+07	3.2814e+07	2.92114e+07	3.03563e+07
ANGPTL3	9084.37		210736			724991	56060.5				673916	519436					663780
ANK1	856787	4707962	2.61281e+06	2.79614e+06	1.27343e+06	1.04549e+06	3.88656e+06	2.56987e+06	2850016	2.70242e+06	2.17434e+06	2.03013e+06	1.40985e+06	6.95218e+06	946559	1.97245e+06	2.16204e+06	1.04881e+06	1.61792e+06	1.80681e+06
ANK2	2.75556e+06	305999					2.48495e+06	4138040	3013394	4409792	2.79522e+06		3.5553e+06	4450360	3381818	956652	3293996	3.51374e+06	302826
ANKRD54	2435280	492278				1980745		5510985	1658955		5107595	3675550	3529995				3696350			3791635
ANO10	3.0999e+06		3605405		3814220	2.618e+06		3622495		3.64636e+06	2.92908e+06	2.11602e+06	3.90013e+06	3.02298e+06	3667495				5.16489e+06
ANP32E	347014		1153220															347838
ANPEP	1.46927e+06	1.60953e+07	1.5087e+07	9.97345e+06	7.30265e+06	1.61559e+07	4.20832e+07	7.35937e+06	1.54215e+07	1.81208e+07	8.59989e+06	5.12319e+07	1.37328e+07	5.05586e+06	1.35459e+07	1.35941e+07	2.16777e+07	8.70011e+06	5.81553e+06	1.04474e+07
ANXA1	1.02095e+07	7.62847e+06	1.31405e+07	33374070	7431810	1.91943e+07	4279642	8.36449e+06	1.13912e+07	5483400	6.75769e+06	3.74756e+06	2.25901e+07	10408900	7.03587e+06	1.03902e+07	6.22354e+06	5713410	10404123	1.99856e+07
ANXA10	7.57466e+06	5611552	8430000	8.21879e+06	4653925	4828098	6913600	2709540	6.32391e+06	2.9739e+06	5.62731e+06	8806115	17144195	1.9208e+07	6.63059e+06	1.29658e+07	6.73731e+06	0	8402290	813016
ANXA2	1.55037e+07	1.74045e+07	15132500	1.56847e+07	1.46029e+07	16399600	1.48791e+07	1.4676e+07	1.50029e+07	1.96213e+07	10879800	1.19718e+07	12026200	18637800	1.74053e+07	1.27213e+07	1.79663e+07	8884225	18112000	1.79288e+07
ANXA6	8.88215e+06	2.30737e+07	9.52768e+06	3.16225e+06	7.68571e+06	8.19537e+06	1.00296e+07	14245665	6.90974e+06	8467042	4.47981e+06	6.90464e+06	1.45765e+07	6.63765e+06	4.45901e+06	1.27279e+07	1.44633e+07	3.73179e+06	9.35818e+06	5.57914e+06
AOC3	337355	588780	4.54991e+06	335737		78452.7	324723	322800	0	578476	68904.7	2.78439e+07	623761	451278	1.31699e+06	8.48969e+06	362978	257175	447429	294473
AP1B1	7703270	9260238		12733075		4.8121e+06					8.46488e+06	2.51077e+06	8807540				1.31462e+07	9.30142e+06
AP2A1	2.68845e+06	1.66526e+06	3.1868e+06	2.57993e+06	1.63021e+06	2.25185e+06	2.69182e+06	13818875	6.18368e+06	4.47615e+06	6.27254e+06	3.52429e+06	4.49689e+06	2.66242e+07	1.87851e+06	4.52719e+06	1.64611e+06	2.35108e+06	9.99114e+06	1.53669e+06
AP2A2	1396695		2.19233e+06	2.57993e+06			2.69182e+06	13818875	4046845	2.34067e+06	6.27254e+06	2.37275e+06	2.19156e+06	2.66242e+07		1.99041e+06			6.61241e+06
AP2M1	3333230	4148880		9403125	8344960	9131540		7529575	4450210						3878905	4162785				6316970
AP2S1	173541		239496	150560	175450	157079	205325	179199	125498		291656			79483	258684	222814	112290
APCS	2.67567e+07	3.18056e+07	4.15641e+07	4.06696e+07	3.88579e+07	3.62586e+07	3.42674e+07	3.69283e+07	2.98189e+07	3.9636e+07	3.65604e+07	2.90207e+07	3.54482e+07	4.14499e+07	4.01116e+07	3.78894e+07	2.97868e+07	3.72952e+07	3.10743e+07	3.17799e+07
APEX1	1.76884e+06	2.4154e+06	1.94682e+07	1.93551e+06	1.8185e+06	1.86883e+06	2.08063e+06	1.41656e+06	5.86183e+06	2.06784e+06	2.32348e+06	2.11249e+06	2.46695e+06	8.59411e+06	1.56397e+06	2.70242e+06	2.47393e+06	1.86612e+06	2.74699e+06	1.13447e+07
API5	8.42034e+06	10808500	14273050	7784265	6.89289e+06	7.89911e+06	1.05375e+07	9.55121e+06	9.74519e+06	6176250	7.80635e+06	8479825	5.984e+06	1.09956e+07	8702700	11886000	7761914	5719400	8.07014e+06	6.76731e+06
APMAP	1.18276e+08	1.55976e+08	1.87091e+07	1.67487e+08	3.5845e+07	541573	2.92811e+08	2.19154e+08	2.91255e+08	926400	1.68327e+08	2.39583e+08	186678	2.97975e+08	897223	3.0485e+08	1.86902e+07	3.53554e+07	1.84087e+08	1.76601e+06
APOA1	5.80417e+09	7.01485e+09	6.86638e+09	7.22249e+09	6.98388e+09	6.63845e+09	6.82652e+09	6.82939e+09	7.03419e+09	7.34527e+09	6.63884e+09	5.63865e+09	5.67193e+09	6.94634e+09	6.65352e+09	5.829e+09	6.58515e+09	7.67121e+09	6.10593e+09	6.58312e+09
APOA2	3.8638e+08	4.64006e+08	5.09408e+08	4.9887e+08	4.62153e+08	4.80715e+08	4.17578e+08	4.79262e+08	4.67274e+08	5.00676e+08	4.16308e+08	4.16971e+08	4.84239e+08	5.15916e+08	4.85823e+08	4.92838e+08	4.46764e+08	4.74244e+08	4.31881e+08	4.15204e+08
APOA4	4.57327e+08	5.32846e+08	3.90706e+08	3.9414e+08	3.69517e+08	3.58122e+08	4.81814e+08	5.31515e+08	5.02258e+08	3.4415e+08	4.72907e+08	4.79028e+08	5.08685e+08	5.56304e+08	3.3961e+08	5.0579e+08	4.92932e+08	3.81568e+08	3.36487e+08	3.92053e+08
APOB	1.48848e+09	1.81336e+09	1.94486e+09	1.8195e+09	1.88057e+09	1.75553e+09	1.63435e+09	1.8713e+09	1.77283e+09	1.93961e+09	1.87794e+09	1.48877e+09	1.75586e+09	1.82771e+09	1.80507e+09	1.6876e+09	1.79288e+09	1.75842e+09	1.65139e+09	1.86995e+09
APOBEC3G	52175																			2175050
APOC1	5.85662e+07	8.73841e+07	8.03128e+07	9.26496e+07	7.27382e+07	7.90091e+07	6.97789e+07	6.75722e+07	6.97922e+07	7.78306e+07	1.05548e+08	7.02665e+07	6.19412e+07	9.79978e+07	6.50867e+07	7.74277e+07	8.0774e+07	9.51051e+07	7.33436e+07	8.08347e+07
APOC2	8.23814e+07	9.02589e+07	1.03656e+08	9.14915e+07	9.47773e+07	8.88035e+07	8.86829e+07	9.59388e+07	1.00604e+08	1.05232e+08	9.6871e+07	8.0478e+07	8.7851e+07	9.27934e+07	1.02679e+08	8.08186e+07	9.0976e+07	9.17583e+07	8.03867e+07	9.62252e+07
APOC3	2.7155e+08	3.01334e+08	3.59164e+08	3.41152e+08	3.30371e+08	3.34426e+08	3.14489e+08	3.37092e+08	3.6346e+08	3.55671e+08	2.95309e+08	3.11045e+08	3.25451e+08	3.36681e+08	3.38616e+08	2.93963e+08	3.19928e+08	3.11628e+08	2.92598e+08	3.24165e+08
APOC4	4.85844e+06	6.10559e+06	9.09823e+06	5.50953e+06	7.98746e+06	6.82082e+06	6.23332e+06	7.99325e+06	7.71265e+06	1.62424e+07	5.74814e+06	8.39999e+06	6.22018e+06	9.31301e+06	7.44383e+06	7.56317e+06	8.88602e+06	8.9282e+06	5.95271e+06	6.40556e+06
APOD	4.03069e+07	4.3372e+07	4.44111e+07	4.31687e+07	4.2849e+07	4.2745e+07	4.15763e+07	4.1443e+07	4.38346e+07	4.63462e+07	5.09352e+07	4.06308e+07	3.54264e+07	4.17693e+07	5.35189e+07	3.75058e+07	4.42381e+07	3.81686e+07	3.52314e+07	4.53651e+07
APOE	1.97802e+08	2.4066e+08	2.90206e+08	2.38123e+08	2.65897e+08	2.22608e+08	2.01308e+08	2.76916e+08	2.27947e+08	2.635e+08	2.6136e+08	2.13487e+08	2.4035e+08	3.41247e+08	2.4451e+08	2.32257e+08	2.65305e+08	2.4193e+08	2.43433e+08	3.01751e+08
APOF	6.35207e+06	7.18879e+06	9.5494e+06	8.7926e+06	9.24676e+06	8.08284e+06	7.88162e+06	7.88994e+06	8.67356e+06	1.04906e+07	6.67057e+06	6.33109e+06	8.40141e+06	1.00549e+07	8.12797e+06	9.90296e+06	9.62629e+06	5.99885e+06	8.65878e+06	5.96243e+06
APOH	4.9008e+07	5.54043e+07	5.97714e+07	5.7592e+07	5.35867e+07	5.37311e+07	4.47029e+07	6.08953e+07	5.46785e+07	6.1719e+07	4.37309e+07	4.49808e+07	5.05721e+07	6.26025e+07	3.94913e+07	5.65412e+07	5.13523e+07	5.13296e+07	5.33091e+07	6.34513e+07
APOL1	3.21488e+07	3.1879e+07	3.57162e+07	3.48414e+07	3.22477e+07	3.30343e+07	2.99337e+07	3.86065e+07	3.19999e+07	3.65526e+07	3.21408e+07	2.60032e+07	3.18944e+07	2.96454e+07	3.57422e+07	3.16599e+07	2.86369e+07	3.31961e+07	2.94873e+07	3.15388e+07
APOM	3.0914e+07	2.93196e+07	3.37082e+07	2.78342e+07	3.11116e+07	2.60526e+07	2.63773e+07	2.93052e+07	2.68263e+07	3.54238e+07	3.93765e+07	2.81978e+07	2.40209e+07	2.84749e+07	3.58013e+07	3.11763e+07	2.66685e+07	3.28346e+07	3.51942e+07	3.10055e+07
APPL2	62741325		0								4.00347e+06					16450400				3928940
AQR	1.71222e+06	1.93277e+06		2487520	2.36503e+06		2.40477e+06		958417		173794	2.12804e+06	2281450	3.51235e+06	473612	1398110	1796720	1517680	1.0781e+06	2566395
ARF1	2.45598e+06	2.03883e+06		2.83267e+06		2.50324e+06	2.50121e+06	3.10789e+06	1.35417e+06	2.34731e+06	1.43035e+06	4.75953e+06		3305560	3.35056e+06	3.07836e+06	2249451	2213205	3455480	303796
ARF3	2.45598e+06	2.03883e+06		2.83267e+06		2.50324e+06	2.50121e+06	3.10789e+06	1.35417e+06	2.34731e+06	1.43035e+06	4.75953e+06		3305560	3.35056e+06	3.07836e+06	2249451	2213205	3455480	303796
ARF4	716936	2.2318e+06	2.50683e+06	1.91321e+06	1.20389e+06	1.70401e+06	664076	1.76892e+06	1.6137e+06	28231.2	1.40955e+06	1.15665e+06	1169372	1.67898e+06	1.33291e+06		1144094	1.44103e+06	960108	2.08724e+06
ARG1	7902920	163425	6080625	7.45586e+06	5619270	6988770	8035225	4893690		8364890	5392825	11531710	7753555	4.21016e+06	3948385	3020370	5449880	5830410	4521840	4550930
ARHGAP17	2000715		3.61214e+06		472111	832390		556592	437762	1085701	1.77144e+06	867139	657062	519044		351330	2649650		1.80171e+06
ARHGAP25	92978000		212244500	6.83675e+07		184152500	217511369	127553000		174036		100468500	164451500	206724914			160626000	90759000	172061000
ARHGAP35	0		86997.3		2.66245e+06	0					1558449	2.23713e+06
ARHGDIB	1.96267e+06	1.15976e+06	3.45755e+06	3.09729e+06	325525	2.54988e+06	2.52931e+06	2891914	877177	3.54613e+06	1257600	674820	1.2412e+06	945689	1306945	3348440	2203980	948565	3216760	2.44791e+06
ARHGEF2	42348.9	60070.4	47682.1		53042.1		21188.8		171064			55250.6				56514.5	40690.1	1604590	41703.4	60674
ARHGEF6	5.77878e+06	7.06003e+06		7.0941e+06	8543700	8.01323e+06	7.57317e+06	7.99948e+06	5.11818e+06	6.59262e+06	2.85427e+06	6.47227e+06	8286948		9.10753e+06	8.34761e+06	5.84114e+06	8.20492e+06	4.88124e+06	6.32619e+06
ARID1A	9.76557e+07						327701000	325545000	279610000	243036500			1.13207e+06							286827250
ARID3A	237883000	345841000		252802000					253125500		100994000	280080000			152928500	207130500		2.72547e+08	2.75936e+08
ARIH1	1.44684e+06			1.06846e+06	1.05278e+06	770510					1013110	1626132		1481285		1.02331e+06	1626648			763770
ARL8A	2424495	12152500	6268720	3.72158e+06					3.98897e+06	6615755	8154480	2369685	4128540	3.43273e+06	7.30651e+06	3.16065e+06	5.90241e+06	6.17716e+06		5427288
ARPC1B	1.50647e+06	267351	523046	1.25703e+06	2.59055e+06	1216185	1.22496e+06	1.87107e+06		5.80921e+06	56602.4	831189	3243650	1.50563e+06	343550		4.40769e+06		2268170	455374
ART4	31539.9	8416.4								35490		46737.9
ASAP2	140049								3.44012e+06		588066					360363	213696
ASCC2	8730555	9.75056e+06	7.96448e+06	6207824	14351450	7.56234e+06	6962200	12929300	10179400	4.93774e+06			8.32937e+06	8.42971e+06		6437460		7.33983e+06	7.41471e+06	13686200
ASL	0	533566	311599	3445226	282320	538701	466710	1.0335e+06	320302		276120	417372	258238	455405	159896	208391	0	461166	1307515	514880
ASPN	7143800	215466					13185.7				877873
ASS1	1011655		1.71983e+06	1.07057e+06	1.13469e+06	1.09606e+06		9664360	1484386	3197750	649678	4.11327e+06	2089671	1986020	966513	1076085	1.08401e+06	7562870	1.41502e+06	850518
ATG101	611928							458778	366118						543973
ATG4B	2.26574e+06		5284125	5059800			3.03696e+06			2.66604e+06		3.27115e+06						2446280		3628100
ATG9A	3.02025e+06		4151565	3.28627e+06	4717905	3.9413e+06	2.62971e+06	3665584	4.06791e+06	3.66636e+06	4.92101e+06	2.95911e+06	3252486	3647560	5.09e+06	3.35867e+06	3152966	3.24164e+06	3.3262e+06	3.87492e+06
ATIC	226762	7382635	7.27853e+06	331831			3557005	5.92013e+06	4867880	2791250		4147070		993209	0	477396	8750047	56502.2	4.0748e+06	5.30948e+06
ATL3	516342	1.01746e+06	550230	882508	5.9916e+06	538385	232188	1251030				327908			494151				1.68566e+06
ATP5F1A	3.76198e+06	7.88438e+06	4.28557e+06	1.9128e+07	5.54943e+06	1.38657e+07	6.05145e+06	6.18585e+06	3.74563e+06	6.12976e+06	1.06681e+07	1.53493e+07	4.35062e+06	2.24856e+07	1.28862e+07	3.76001e+06	6.51455e+06	6.07011e+06	1.46258e+07	4.66898e+06
ATP5F1B	9.55371e+06	1.08304e+07	2.68591e+07	1.02781e+07	15068632	1.97304e+07	1.09518e+07	9.34961e+06	1.12257e+07	7.24359e+06	1.57221e+07	1.18156e+07	19977310	2.08793e+07	23367550	1.26332e+07	3.46352e+06	2.08271e+07	1.27282e+07	3.01919e+06
ATP5F1D	8478645				7.02018e+06	3.15982e+06			4568800								1.13769e+07			4119390
ATP5PD	1.54112e+06	2.98895e+06	5.08002e+06	1838410	1.27928e+06	909820	4868447	5181500	600355	6196370	3.18721e+06	3.00805e+06	0	413965	1.51685e+06	4.4901e+06	2.50509e+06	1782624	1501055
ATP5PF	483953	438697		652076	0	641075	631364	556953	451651		578210	478187	1.43587e+06	491073	754111	655119	581571	365816	351659	668710
ATP5PO	16154991	1.80672e+07	10516087	5.02247e+06	1.11264e+07	14533400	14401950	6.9463e+06	442367	1.19247e+07	1.14641e+07	7.20705e+06	6.05117e+06	14405300	2.1409e+07	1.7851e+07	333915	1.04178e+07	2.03496e+07	11479914
ATP6V0A1	1558530																		108389
ATP6V1A	1345370	2.25099e+06	6309830	1952674	1.34678e+06	2412440	1.29651e+06	7110773	1.78892e+06	6210740	1276405	466025		1.62378e+06	6.37143e+06		2167615	1553345	7173470	8376140
ATRN	6.96672e+06	1.22577e+08	9.05551e+06	7.63431e+07	7.31184e+07	1.01889e+07	6.5205e+07	1.27153e+07	7.44003e+06	1.3002e+08	7.64781e+06	7.14294e+06	1.13886e+08	8.45529e+07	1.28553e+08	5.60153e+07	6.67803e+07	1.0984e+07	8.51731e+06	9.06239e+06
ATXN10	4.50194e+06	5382090	5.59069e+06	5.57863e+06	5.17446e+06	4.83058e+06	5.3375e+06	5.43794e+06	4.83521e+06	6.43433e+06	5739688	6.84514e+06	4.91141e+06	5.71729e+06	3.66047e+06	4.53377e+06	6.17067e+06	5.7832e+06	5.17332e+06	5.86051e+06
AZGP1	5.74378e+07	4.71961e+07	6.14279e+07	6.29971e+07	5.82598e+07	5.3243e+07	4.29656e+07	5.86228e+07	5.76912e+07	6.92546e+07	5.54542e+07	4.93669e+07	4.89406e+07	6.82703e+07	5.69755e+07	5.22653e+07	5.57338e+07	6.05457e+07	6.48599e+07	5.19663e+07
B2M	232033	7.98759e+06	348168	700142	2.61746e+06	407505	861372	2.89768e+06	669877	1.45983e+06	288186	3.4263e+06	1.77997e+06	818153	1.06741e+07	363433	1.20987e+06	3.75847e+06	4.45295e+06	901852
B3GALT6	15897500
B3GNT6	3868610	2.79291e+06	4064005	3968840	2166380	1.77e+06		3593992	5038120	4505255			4.58408e+06		8376180		4.65316e+06
BCAN	783002	1.63279e+06	1938275	4737485	1143545	6.18041e+06	3.01009e+06	1.07142e+06	3269460	4276525	974385	2.52995e+06		1.87297e+06	3.55786e+06	399462		2.84772e+06	4.15748e+06	1.63014e+06
BCAP31	1.37595e+07	1.24864e+07	9.26381e+06	1.09281e+07	1.67191e+07	1.62688e+07	1.10734e+07		15617920	11972475	1.5999e+07	8.26964e+06	1.56214e+07	15660400	7.36797e+06	1.79934e+07	10862565	9.93347e+06	8.30875e+06	1.05214e+07
BCAS3	361297		589425			259914	186398					332660							1.19323e+06
BCAT2	1527080					953620									761640
BCHE	2.53243e+07	2.40843e+07	2.84424e+07	1.41766e+07	2.57213e+07	1.53302e+07	1.83489e+07	2.7877e+07	1.75501e+07	2.51269e+07	1.5685e+07	2.48586e+07	2.97487e+07	1.38562e+07	1.37704e+07	2.34508e+07	2.35683e+07	1.7489e+07	2.0311e+07	1.66165e+07
BLMH	4.19198e+06	3.2593e+06	6.43963e+06	7.35184e+06	6.13307e+06	6695385	3734305	5.59134e+06	7.47779e+06	5.08996e+06	2868763	7.39353e+06	8455195	4.87948e+06	6.40522e+06	8.00863e+06	7.82276e+06	1.05124e+07	4.96578e+06	3.73853e+06
BLOC1S4	1.07478e+06	727612	1.3071e+06	2.32099e+06				199216	1.89685e+06						610921	581080	1.16921e+06
BLVRB	2864522	823906	991993	1.32434e+06	1.32777e+06	1.24042e+06	933280	1.30779e+06	6.56642e+06	1292490	1.31505e+06	2.55418e+07	2.11668e+06	5.93415e+06	1.33857e+06	1.57665e+06	1.75948e+06	1678843	1.23358e+06	3.13728e+07
BRAT1	531594							625768				81570.3								490973
BSG	6.58109e+06	9693180	1.33887e+07	5890800	14200400	12598550	1.57854e+07	1.41783e+07	17572200	1.63836e+07	1.12033e+07	12964100	8427200	11573200	13554120		1.01793e+07	13986650	12926580	1.48141e+07
BSN	780209		815888	494134	826608	866598		358918	883537		853957	270422	867995			451874	0			934764
BTD	1.04349e+07	2.0894e+07	1.695e+07	1.71142e+07	2.2757e+07	1.53572e+07	1.63653e+07	1.96007e+07	3.41618e+07	2.7891e+07	2.27093e+07	2.0392e+07	1.91195e+07	1.7108e+07	5.54608e+07	2.59163e+07	1.37936e+07	2.29922e+07	1.43336e+07	1.92142e+07
BTF3	844655			2755730
BTK	1222045						386096
BUB1B	27208150	72071850	73114200	66549200		50821950	37638500	72575100	66628800		27597650	28107600	64053250	65975850	68740000	65770050	57901100	31289600	65380250	60562950
BUB3	1.31046e+06			1728435										904722		2.48876e+06	2351530	1.16887e+06	1.24032e+06
C16orf58	21911.2
C1QA	3.09492e+07	3.94286e+07	3.73225e+07	3.84918e+07	3.28765e+07	3.21279e+07	3.58162e+07	3.61707e+07	5.50436e+07	4.1385e+07	3.4689e+07	3.24938e+07	3.872e+07	3.51068e+07	4.42934e+07	3.92507e+07	3.52061e+07	5.70043e+07	4.78436e+07	3.74563e+07
C1QB	4.5202e+07	5.71625e+07	5.87625e+07	1.12815e+08	8.33311e+07	4.34033e+07	5.68456e+07	7.39053e+07	8.28215e+07	3.95911e+07	5.31311e+07	5.04513e+07	7.6914e+07	9.18489e+07	5.87696e+07	1.04981e+08	5.93035e+07	4.71715e+07	5.55579e+07	4.59559e+07
C1QC	3.03536e+07	3.63713e+07	3.40741e+07	4.61032e+07	3.85346e+07	3.24849e+07	3.24903e+07	3.2249e+07	3.94787e+07	3.73484e+07	4.2698e+07	3.14349e+07	3.21033e+07	3.58121e+07	3.00692e+07	3.41111e+07	3.1774e+07	3.37875e+07	3.46407e+07	3.76405e+07
C1R	3.0193e+07	2.28709e+07	3.28096e+07	9.67808e+07	2.40415e+07	2.11836e+07	2.57515e+07	8.59701e+07	3.141e+07	3.31536e+07	3.01374e+07	7.20772e+07	9.51391e+07	2.09343e+07	4.40366e+07	4.98506e+07	4.60439e+07	4.96628e+07	8.38892e+07	9.54753e+07
C1RL	4.98236e+06	1.23846e+08	7.04194e+06	6.01531e+06	6.60059e+06	9.62963e+06	6.15847e+06	6.62306e+06	1.08931e+07	1.02632e+07	5.35493e+06	6.64487e+06	7.27286e+06	8.67011e+06	7.25781e+06	9.03504e+06	8.66537e+06	5.92494e+06	1.08682e+07	6.9328e+06
C1S	5.16909e+07	5.81388e+07	5.89581e+07	5.97343e+07	6.27902e+07	5.39597e+07	5.19335e+07	6.48297e+07	5.53076e+07	6.36872e+07	6.50944e+07	5.47828e+07	5.82557e+07	6.27853e+07	5.39568e+07	5.93817e+07	5.99412e+07	6.27982e+07	5.67068e+07	5.94682e+07
C2	1.99883e+07	3.23089e+07	2.89581e+07	3.46532e+07	2.72666e+07	3.12811e+07	2.91609e+07	2.53274e+07	2.76825e+07	2.95816e+07	2.67074e+07	2.72778e+07	3.24647e+07	2.85914e+07	3.13638e+07	2.92347e+07	2.69001e+07	4.19472e+07	3.51072e+07	3.2506e+07
C2CD2	145499			74420			106736		148352										137505
C3	4.31919e+09	4.92492e+09	5.11517e+09	5.25295e+09	5.13229e+09	4.7393e+09	4.45423e+09	4.3826e+09	5.17514e+09	5.12001e+09	4.77411e+09	4.36456e+09	4.70497e+09	4.99039e+09	4.93789e+09	4.68719e+09	4.73596e+09	5.20325e+09	4.34485e+09	5.02204e+09
C3orf38	563597			1345615								1.08244e+06
C4A	5.93421e+08	6.00056e+08	7.28877e+08	8.02638e+08	7.21874e+08	6.6574e+08	6.63639e+08	7.18665e+08	6.7118e+08	7.91482e+08	7.86682e+08	6.55883e+08	6.42208e+08	7.21418e+08	6.781e+08	6.93162e+08	6.46504e+08	7.39416e+08	7.08446e+08	7.00051e+08
C4B	5.97108e+08	6.07888e+08	7.47864e+08	8.2256e+08	7.39627e+08	6.80879e+08	6.68317e+08	7.27087e+08	6.87682e+08	8.22681e+08	8.05093e+08	6.5704e+08	6.61318e+08	7.3069e+08	7.00569e+08	7.01291e+08	6.58167e+08	7.59746e+08	7.32485e+08	7.18074e+08
C4BPA	7.15629e+07	9.20506e+07	9.96541e+07	8.70505e+07	8.99229e+07	8.64169e+07	9.29552e+07	1.15029e+08	1.17948e+08	1.06981e+08	8.81523e+07	7.75218e+07	8.61818e+07	9.95172e+07	1.05519e+08	9.79281e+07	9.66171e+07	1.11904e+08	8.88523e+07	9.32985e+07
C4BPB	1.31316e+06	659961		911013	290847	620573	3.60715e+06	4.1995e+06	1.84146e+06	2.91456e+06	2.21452e+06	3.23896e+06	196300	613639	809120	1912660		609402	679894	781022
C5	1.38266e+08	1.44501e+08	1.69184e+08	1.71427e+08	1.77888e+08	1.79096e+08	1.31063e+08	1.96977e+08	1.68216e+08	2.01455e+08	1.54244e+08	1.55781e+08	1.47532e+08	1.61673e+08	1.62757e+08	1.51488e+08	1.48903e+08	1.65144e+08	1.43997e+08	1.62853e+08
C6	3.6453e+07	3.72549e+07	4.1205e+07	5.80104e+07	5.04096e+07	5.64226e+07	4.28093e+07	4.91083e+07	3.73922e+07	5.32557e+07	3.01127e+07	3.67651e+07	4.78903e+07	3.51399e+07	4.46446e+07	5.13075e+07	4.83249e+07	4.9768e+07	3.2284e+07	3.66086e+07
C7	9.70259e+07	9.35331e+07	8.03883e+07	1.30694e+08	6.63973e+07	5.56059e+07	5.25554e+07	1.04894e+08	1.66784e+08	1.52987e+08	1.63052e+08	5.63812e+07	9.20833e+07	8.3689e+07	1.51933e+08	9.14674e+07	1.08736e+08	4.80111e+07	9.3124e+07	1.35477e+08
C8A	7.68402e+08	1.28177e+09	1.42243e+09	1.37193e+09	1.71155e+09	1.07217e+09	1.49676e+09	1.32162e+09	1.59812e+09	1.53176e+09	1.18846e+09	1.47425e+09	1.34275e+09	1.55893e+09	1.70162e+09	1.41629e+09	1.63321e+09	1.68235e+09	8.23767e+08	1.45051e+09
C8B	4.20664e+07	4.79691e+07	5.3352e+07	4.9123e+07	4.67986e+07	4.72899e+07	4.69857e+07	4.93291e+07	5.09918e+07	5.45035e+07	4.55126e+07	3.61296e+07	4.82379e+07	5.71862e+07	5.13016e+07	4.99965e+07	4.27623e+07	6.93807e+07	4.89322e+07	4.29957e+07
C8G	1.32994e+07	1.24941e+07	1.37297e+07	1.32172e+07	1.31145e+07	1.05805e+07	1.1618e+07	1.30112e+07	1.19598e+07	1.70005e+07	1.39572e+07	1.01747e+07	1.29925e+07	1.34438e+07	1.50494e+07	1.55162e+07	1.20964e+07	1.41941e+07	1.11495e+07	1.52877e+07
C9	5.03936e+07	5.92518e+07	6.41694e+07	5.99389e+07	5.45413e+07	5.31967e+07	6.14644e+07	6.80865e+07	5.9229e+07	7.8638e+07	6.24726e+07	4.15654e+07	4.68844e+07	6.1529e+07	6.83854e+07	6.63053e+07	5.88015e+07	5.70456e+07	5.42138e+07	7.18132e+07
CA1	1.2614e+08	1.82389e+08	3.58182e+06	2.98776e+08	1.44632e+08	2.7084e+08	1.91785e+08	2.23762e+08	1.90381e+08	1.73624e+08	2.45688e+08	1.48604e+08	2.01247e+08	1.61511e+08	3.25782e+08	2.13613e+08	3.06646e+08	2.74831e+08	3.32075e+08	2.84368e+08
CA2	4455004	276310	2.51036e+07	4858550	918476		4.94325e+06	7.84716e+06	6028260	350661640	4.82157e+06	222683982	3.70648e+06	163913	5.70273e+06	369599	377124675	1156895	8.64313e+06	5.36343e+06
CA3	186557			2031730			170137				487036	196090					3.52217e+06	715748
CACNA2D1	6731000	2.53712e+06	770142	3.71137e+06	3.41287e+06	1.6095e+06	14435100	4.35986e+06	3147980	1.95525e+06	1.76589e+07	1.51787e+06	1.68499e+06		3.83413e+06	1.37318e+06	1.73118e+07	3.28554e+06	1.0372e+07	1.7733e+07
CADM1	120395	817248		7407555		782350		1026354			1245610	1.55837e+06					2355335			6020870
CADM4	5.27533e+06	12242120		16399600	1.66453e+07	17453700	10944525	19342900	14281261	9539250	8925200	13613000	6213500	20426800	7489650	1.04934e+07	8752700	13643400	10785315	19918800
CALB1	2.57918e+06					3141370	500392	1393305	521207					1150945	4.10884e+06		706015	1.4615e+06	0	2998570
CALD1	32495900	34854850	1.12961e+07	32752100	4.61639e+07	12014790	8.43371e+06	1.14825e+07	802785	0	1.14078e+07	28493875	30728650	23565925	1.8446e+07	2.79842e+07		2.60436e+07	3.1206e+07	38760050
CALR	8.54837e+06	8.54874e+06	1.08287e+07	3.8193e+06	1.77999e+07	9.13803e+06	1.08577e+07	7.88381e+06	3.51206e+06	7.74462e+06	1.84099e+07	1.08903e+07	8.24535e+06	7.3609e+06	1.18427e+07	1.21555e+07	2.69762e+07	1.14845e+07	1.3006e+07	5.59874e+06
CALU	265882		852050	734575	555900		650952	866437		512616	519851	1738650		172147		711443	653747			267266
CAMP	3.21626e+06	182659	214636	229097	247999	154522	158869	254379	220413	241185	183307	143440	206937	218867	180642	176014	185236	222109	205841	194339
CAND1	6.7882e+06	7.86086e+06			71030	1107325	476362	8.35472e+06	1.35235e+07		4625780	1.0474e+06				5.59937e+06		5346325		4.11314e+06
CANX	527077		2015860	936298			385463				334648	532500	1341227		52881.7
CAP1	93636.2				1.17957e+06			69369.6	786938	116208	67511.4	60569.3	12815737				9006605	9.06531e+06	48281
CAPG	5.39746e+06	4.87279e+06	3.44631e+06	9.41651e+06	3317885	5.98861e+06	4.87277e+06	3065762	4.05764e+06	3.25492e+06	2.69878e+06	4.46426e+06	2.78997e+06	4499382	3.30903e+06	7885143	5.48303e+06	3736564	5.3338e+06	6.07038e+06
CAPN1	3682670	6.02428e+06	5606180	2930876	5.04107e+06	5748630		6687000		2627940	3.08882e+06	3750910		4.19286e+06	4253210	4043020	5166271	177825	4.03341e+06	2.81315e+06
CAPN2	123558775		1.27141e+07	329725150				297059500		4354700	431976000	16853100	1.57282e+08		1.29954e+08	13977600	2.31e+08		344486650	4.60282e+07
CAPNS1	13707875		12411050		9943645						19820050			0	103271		14564010		2.7082e+07
CAPRIN1	3.85785e+06
CAPZA1	1.82048e+06	234311	2049120	3459860									1091198		3.31178e+06		1403130		1.76401e+06	1325615
CARD9	1925870	1901000	1697200	1876620	1842380	1897580	1494280	1561170	1839570	1798460	965493	1331240	1642950	1216060	1979085	1794350	1129190	2047450	1683810	735830
CASP12	2.0078e+06	1.13473e+06
CASP4	2.0078e+06	1.13473e+06																	166488
CAT	8.54667e+07	7.4503e+07	7.84614e+07	1.37688e+08	1.37338e+08	1.19738e+08	7.72322e+07	6.70591e+07	7.97281e+07	1.53534e+08	1.26256e+08	1.94415e+07	1.17583e+07	1.43431e+08	1.39253e+08	1.38578e+07	1.02376e+07	7.80402e+07	1.31495e+08	7.11305e+07
CCAR1	1486005				3.27201e+06		931450			2126878	4092460					2.15494e+06	0	3.61662e+06
CCDC126	106696	158514	267225	189214	89595.3	239983	211659	179050	114731	290399	141783	133019	100206	147435	151849	363778	217779	129547	179906	155324
CCDC22	1891920	741104	890506		526588			576796			1135840	2015700		394754	681566	443377	769289		393904
CCDC47	1.34447e+07		1.17516e+07					18130250					1.29896e+06	17721800					73794100
CCNK	7430500	1.06046e+07	3609198	4757220	9.61633e+06	11112582			6840300		0	9387535	8427902	5288800	10052430	11615132	9742265		10638400	5267200
CCT6A	1.40505e+07	9.32574e+06	1.82704e+07	1.91187e+07	1.1482e+07	1.60099e+07	15493250	9.96111e+06	13424750	1.58717e+07	16909230	1.40965e+07	18624116	12923066	17697889	1.32847e+07	16952366	1.08503e+07	11168080	1.20432e+07
CCT8	932049	7.63743e+07		640955	1.42232e+06	1027360	1.08561e+06	44550300	68260.8	247134	862685	2.54708e+07	1.92875e+06		1.44837e+06		74843850	677653	6.99913e+07	0
CD109	1.32963e+07	34834200	1.64782e+07	3.77588e+07	24309916	2.1669e+07	2.42282e+07	2.50368e+07	2.59941e+08	1.0556e+07	1.84873e+07	3.38354e+07	20109156	1.42286e+07	2.49873e+07	2.02266e+07	2.32166e+07	2.61355e+07	2.96135e+07	1.82912e+07
CD14	3.93978e+06	2.48815e+08	4.99e+08	4.93652e+08	2.08937e+07	3.60004e+06	4.53177e+08	4.95029e+08	4.98839e+08	2.37139e+07	4.64941e+08	7.49357e+06	2.21909e+07	2.73376e+08	4.99155e+08	2.51588e+08	5.01413e+08	2.44124e+07	2.53278e+08	4.62477e+08
CD163	4453665	4.34501e+06	3465555	5101790	5082780	4.91314e+06	4383190	4.93913e+06	3162060	4.00873e+06	4457780	3.98117e+06	5301100	3.31303e+06	3413700	4127305	4.79908e+06	3.35474e+06	3.01187e+06	3.85396e+06
CD200	5053400
CD44	89682.2	2.31115e+07	94892.7	1.18767e+07	9.19219e+06	1.76406e+07	4.17245e+06	1.14826e+07	1.14247e+07	7.8794e+06	1.24306e+07	7.67169e+06	1.27449e+07	9.52768e+06	1.38517e+07	5040050	1.98125e+07	6.50331e+06	1.58833e+07	1.84475e+06
CD5L	1.61371e+07	1.63195e+07	17309645	1.75438e+07	18193125	18079560	1.26148e+07	1.01579e+07	18519645	1.50945e+07	16064100	9226130	16094100	1.91557e+07	1.92336e+07	17977715	17341710	8.99239e+06	13989770	1.53647e+07
CD74	6.16681e+07			4.86547e+07		79464200						4.6672e+07			7.79708e+07
CDC23	6357425	3.64647e+06	3878465	4388310	3185175		2.30469e+06		3720955	1980458	5.86549e+06		8330150			6232106				4186940
CDC42BPA	5.85701e+06	10185700	7.96367e+06	11325975	16807130	13356750	13472155	4.92643e+06	7.73189e+06	15666825	4.12621e+06	8424775	14295650	13849615	9418565	9.67459e+06	19865600	10541790	9438090	11287265
CDC42EP4	1.39084e+06		2000410	2274980						368017	1.04304e+06	1.57441e+06	1303190	877588	1.56463e+06	1120805	976503		2.17665e+06
CDC5L	16222280	20086780	21181300	17859160	14822880	14540320	19915600	14014040	18842700	16860340	17561810	16435600	9793292	12451225	15472720	21976660	14468220	20496700	21743300	16473000
CDH1	1323280	1.25696e+07	4800365	25448500	1371980	6325950	9.74687e+06	6.81042e+06	898784				1204284	12617710	2.93197e+06	3.14681e+06	14132700	634985	1.00704e+06	6.93947e+06
CDH2	7174755	4.56001e+06	3.74598e+06	7844020	12013730	1.16875e+07	2303448	1.83107e+07	1.98252e+06	3.53369e+06	5874780	11655170	16952709	6577660	821684	8.51344e+06	4314636	1.51158e+07	7005130	4006412
CDH4	4467075				9671600	10108450							12486025
CDH5	3.97115e+06	6.11146e+06	1.63994e+06	6.83081e+06	5.78294e+06	3.46839e+06	3.22069e+06	2.7061e+06	5.02325e+06	738175	6.17929e+06	2.35254e+06	3.236e+06	5.04704e+06	5.23642e+06	5.43452e+06	3.59648e+06	5.37566e+06	7.42227e+06	1.31896e+06
CDHR2	887533			2033500		1.53147e+06	5.04853e+06	177856		1.43892e+06		1.32996e+06	207598	2.64109e+06		882248	326251		2376940	1.44123e+06
CDS2	1.36473e+06	1105100	1.20915e+06		1278668	1784850	1.12087e+06	1722130	1551430			1.23921e+06			1343095	730285		1.78372e+06	1.211e+06	1553940
CDSN	1.01427e+06	2867370		2774325		603226	731234	1.13095e+06			387836	1.30179e+06			1.11947e+06	1.09787e+06	636789	467247	1.00425e+06	2.26027e+06
CEACAM1	2126180	161540	88433.5			207570	1.89526e+06	3444330	127814			55384.3		2.28189e+06		54031.5		0	1.78762e+06	1.52035e+06
CEACAM8	4.30005e+06	4.04142e+06	5.80225e+06	7.03749e+06	6.02725e+06	5.61189e+06	6.20271e+06	5.99266e+06	9639504	6.88277e+06	1.16492e+07	3.61936e+06	7.11185e+06	8.05215e+06	5.95256e+06	6.81358e+06	6.90135e+06	3.99462e+06	4.96308e+06	5.42084e+06
CEBPZ	672515					356470											302291
CEL	475150	448068	1.21586e+06	1006390			705577	1.76618e+06	483571	708967	488780	169284	1.02462e+06	1088126	296582	2390256	1.20627e+06	1.45362e+06
CELA3A	1.1829e+08	1.53006e+08	147855400	170116390	106649600	1.32758e+08	105740000	1.398e+08	1.00861e+08	1.46997e+08	1.86471e+08	1.69274e+08	1.31497e+08	1.63149e+08	1.53335e+08	128730600	1.31391e+08	180925961	149861323	1.31149e+08
CELA3B	270190	220978		528790		213210		552968	423297	282161	386421	437314	352432	335903	410732		284574	358361	196923	356048
CEMIP2	2.5058e+06	2.99189e+06	3.27339e+06	2.79535e+06	2.15644e+06	2.62284e+06	2458949	1.64416e+06	3101782	3.04901e+06	3.04564e+06	2.6959e+06	2.18335e+06	3.1011e+06	3.05638e+06		3602390	2.47212e+06	2.84207e+06	2.57891e+06
CETP	118845	353541	271655	262006	277647	151920	156429	128865	230872	475330	191124	261251	182993	347008	316342	184826	108372	207529	138936	661288
CFB	5.89576e+08	7.48683e+08	7.27881e+08	5.72585e+08	3.36809e+08	6.31955e+08	2.85193e+08	6.29474e+08	6.98615e+08	7.23914e+08	7.22763e+08	3.28755e+08	6.2153e+08	3.45026e+08	3.26989e+08	7.62459e+08	3.09556e+08	7.4124e+08	7.80937e+08	3.2818e+08
CFD	2.71959e+06	1.6421e+06	4.29192e+06	5.94742e+06	3.93546e+06	1.23491e+06	3.429e+06	3.55997e+06	1.52535e+06	4.84438e+06	3.69957e+06	2.5512e+06	2.02523e+06	2.82078e+06	975955	3.10753e+06	5.12799e+06	4.3969e+06	1.00155e+06	647599
CFH	1.57452e+08	2.45361e+08	2.578e+08	2.39036e+08	2.44697e+08	2.03108e+08	2.07538e+08	2.65505e+08	2.07973e+08	2.20825e+08	2.24054e+08	1.58753e+08	2.17214e+08	2.48817e+08	2.09148e+08	2.14994e+08	2.44389e+08	2.47642e+08	2.37889e+08	2.02745e+08
CFHR1	1.44095e+07	1.76677e+07	1.77122e+07	1.88332e+07	1.58076e+07	1.49655e+07	1.16429e+07	1.59767e+07	1.72887e+07	1.74023e+07	1.70903e+07	1.15811e+07	1.5031e+07	1.69078e+07	1.71884e+07	1.26377e+07	1.73812e+07	1.75387e+07	1.60053e+07	1.49171e+07
CFHR2	3.69201e+06	4.23031e+06	3.91854e+06	4.75212e+06	2.04754e+06	2.87391e+06	2.91929e+06	3.00727e+06	5.12149e+06	5.48335e+06	3.83191e+06	1.91748e+06	3.88918e+06	3.56921e+06	4.1776e+06	3.22652e+06	4.11198e+06	4.52291e+06	3.86457e+06	2.97991e+06
CFHR3	2.66696e+07	3.47218e+07	2.70309e+07	7.71701e+06	4.86703e+07	2.16547e+07	4.77619e+07	4.07637e+07	4.01541e+07	3.99535e+07	3.64454e+07	4.52847e+07	5.25517e+07	8.01614e+06	5.21777e+07	4.92418e+07	3.13091e+07	3.57853e+07	3.49809e+07	2.71941e+07
CFHR4	19189650	2.5929e+07	16496300	0	39382000	1.38513e+07	40459650	30881240	30516300	28474600	30058125	39654900	40357300	241436	42859450	39682550	21732150	25584000	2.63245e+07	1.89455e+07
CFI	6.44105e+07	3.90644e+07	6.43e+07	6.21685e+07	3.90643e+07	6.15288e+07	3.75704e+07	4.32667e+07	5.21146e+07	7.0853e+07	4.98406e+07	5.78234e+07	6.62112e+07	4.52255e+07	5.36286e+07	4.93805e+07	3.58067e+07	3.7777e+07	4.40538e+07	3.73188e+07
CFL1	462249			75430.7		19156807	1175730	1.39576e+07	586460			15159175	967667	2.76995e+07	620093		89874.5	17600.1	728489
CFL2	106659	2353200		75430.7		1326365		2.28836e+06					108447	180682	171832		1.2971e+06	17600.1	74095.1
CFP	534574	285708		702928			316392	283060	823722	409254		652162	678000		1010159	184481	272550			453153
CHIT1	188297				3396065					5.84799e+06	4.33242e+06	4376095	1638505					869955	532599	51600.5
CHL1	1.18543e+08	4.12564e+07	3.51324e+07	9.55506e+07	8.96785e+07	6.22788e+07	7.49591e+07	1.05328e+08	1.1208e+08	6.66232e+07	5.71353e+07	5.02418e+07	6.3502e+07	6.47614e+07	1.45472e+08	7.51998e+07	114349649	1.2109e+08	6.53571e+07	1.08555e+08
CHMP4A	7.10144e+06	6031420	9.32397e+06	7181525	7.38241e+06	6.71414e+06	6.70509e+06	7.40098e+06	5.60035e+06	8.44588e+06	6.76359e+06	5.17741e+06	8154040	6.93235e+06	7.1513e+06	8.77831e+06	8.47017e+06	6.07837e+06	7.58201e+06	6.05542e+06
CILP	71644.2														57092
CILP2	675505					0						3774780						0
CISD2	486872	397238	673659	886816	544039	598314	541722			543338	894764	735098	647071	0	774702	430204		991869	942742	792964
CKM	303620				737354										619907					135075
CLEC3B	2.47391e+06	6.43277e+06	6.75472e+06	6.03575e+06	7.13456e+06	3.69849e+06	5.8038e+06	6.99887e+06	5.88131e+06	4.98707e+06	5.07332e+06	5.11568e+06	1.77005e+07	5.57411e+06	7.21368e+06	4.41065e+06	6.21794e+06	6.20736e+06	4.18421e+06	8.11497e+06
CLINT1	6.16104e+07						69738560	50869200	99745120		54662950	98002550	40266950	23434900		66338325	90144000			57124250
CLIP2	120942
CLPP	4623332	2784825	5636895	5.69984e+06	6.42673e+06	2118900	3.39946e+06	2.23186e+07	4278285		3.71665e+06	3.47115e+06	4141320	5051100	2178220	5.40361e+06		2672875	5740080	4056140
CLTB	997217	2180925		300091	566688	1.55446e+06		1.74561e+06				322249	438975		255123		305831	874165	1.61442e+06	1.0636e+06
CLTC	5.70239e+07	1.15706e+07	1.34492e+07	1.84601e+06	5.78956e+06	3.9947e+06	1.0126e+07	3.52697e+07	4920620	1.30392e+07	1.26764e+07	1.07326e+07	1.57285e+07	1.26326e+07	5.0889e+06	6.85491e+06	963190	2.52307e+07	2.2608e+06	855590
CLTCL1	2.33483e+06	5.48179e+06	3.12015e+06	1.0956e+06	2.6537e+06	987068	654864	5.88859e+06	887930	2.08671e+06	3.55353e+06	8.16769e+06	2.35747e+06	1.69456e+06	3.64821e+06	6.85491e+06		378840	1.4112e+06	855590
CLU	4.24766e+08	4.43866e+08	3.96886e+08	3.61117e+08	4.64162e+08	4.177e+08	3.88237e+08	4.15615e+08	4.17814e+08	4.69108e+08	4.70187e+08	3.4369e+08	5.1978e+08	5.04664e+08	3.95176e+08	3.42249e+08	4.80951e+08	4.68231e+08	4.30542e+08	3.87473e+08
CMAS	851084	1.32738e+06	2804535	1457325	984193	2116055		1998920	2.59047e+06	1.64675e+06	498913	1.32362e+06	2.71152e+06	1453990	1.09576e+06	914398	803488	5051330	1587756	4.15715e+06
CMTR1	1911900	1.37144e+06	1151440							1314376		4061495	1887070		531451			911053	2606270	894685
CNDP1	1.32399e+07	1.75368e+07	1.274e+07	1.67566e+07	1.19007e+07	1.20387e+07	1.50917e+07	1.59564e+07	2.773e+07	1.26527e+07	2.65072e+07	1.74728e+07	1.20693e+07	2.17739e+07	1.56156e+07	2.05653e+07	2.17471e+07	1.32272e+07	1.34695e+07	1.87214e+07
CNN2	1.42905e+07	1.51234e+07	4.68012e+07	1.31493e+07	3.88334e+07	1.98914e+07	1.16557e+07	1.56931e+07	2.51798e+07	1.12112e+07	1.08952e+07	4.41918e+07	3.96721e+07	3.6853e+07	14763020	2.20086e+07	37331565	2.25079e+07	9476375	1.48858e+07
CNN3	0							1.21849e+06			1432030	3.90869e+06		495716			7675925
CNOT3	1.84748e+07	1.99463e+07		1.70353e+07	15939040	1.65801e+07	15043450	19642740	1.41248e+07	1.68305e+07	17307065	1.30183e+07	2.62099e+07	2.11875e+07	21173800	1.61777e+07	1.84896e+07	14139600	1.62548e+07	1.09388e+07
CNTN1	723994	1.28272e+06	64240.1	1.81022e+06	833037	1.18671e+06	15337	1240790	12289.8	1897638	543290	1.48252e+06	395135	1.40317e+06	884727	1.29476e+06	1.26349e+06	260238	526741	1.12338e+06
COG2	6.33506e+06	4020200	85867800					907913	44166150							8894200	70018750
COG3	2344980
COL12A1	8.06123e+06	1.96297e+07	7.31762e+06	7.94657e+08	9933740	2.3989e+07	12355714	8.23692e+06	1.09915e+07	33623965	1.28502e+07	1.00066e+07	6.16525e+06	1.20046e+07	8416250	9.64298e+06	1.07421e+07	1.34695e+07	1.13942e+07	1.37052e+07
COL14A1	6.79858e+06	538036	407624		583403	2156558	10058255	898667		941662	9.8272e+06	5.98855e+06		2070492	897567	2.62094e+06	18886515	147782
COL18A1	1.28882e+06	662250			1.03808e+06	1.12819e+06	1.45906e+06	1.0878e+06	1.84419e+06	3.09071e+06	542964		1.8754e+06			864834	986907	1.7865e+06
COL1A1	931532	1.03257e+06	3.17202e+06	822347	1.97165e+06	3.05045e+06	1.77985e+06	2.27205e+06	778207	833495	2.38722e+06	57700.4	504355	88910.8		9.14925e+06	15300440	2.98571e+06	995848	2686975
COL1A2	6880582	1.30024e+07	4.27101e+06	1.24779e+07	7.16938e+06	102755	2679270	4.92449e+07	628688		5654880	1027085		9.74609e+06	842904	5.0709e+06	6.32303e+06	69573	8.16303e+06
COL3A1	1.53097e+06	585865	3016352		98152.5	823957	626869	1167440	1.10175e+06	1.21786e+06		1915494	889193	2.03456e+06	1.92236e+06	2.29074e+06	175148		1811885	123706
COL4A1	7889360		1.08309e+07	4.8654e+06		7221895		14188490	1.31554e+07			7109070		15483380	9.43093e+06	1.42532e+07				2882365
COL4A5	5.89388e+06		6.1064e+06	6.65371e+06		4952190	5659020	5.35066e+06	6.43303e+06		6144850	7948415		9916880	7970770	8.2354e+06		5.6038e+06		5764730
COL5A1	1.12713e+06	3.31986e+06	2.88239e+06	1.10287e+06	2.46318e+06	540470	2096250	4.25882e+06	2252780	2.09649e+06	3096415	3584990	2.17852e+06	2367864	1708602	1.14487e+06	4.80645e+06	2923830		1.71117e+06
COL5A3	353154	419650	143982479	190764	131350250		1.55927e+08	1.47189e+08	121338750	9.16327e+07	1.27583e+08		1.31044e+08	335658	98456376	486882	152531004		9.73161e+07	116936250
COL6A1	9.14525e+06	1.54848e+07	9.33062e+06	4.97785e+06	1.25462e+07	1.24085e+07	8.42484e+06	1.21683e+07	3.89424e+06	8.40184e+06	14338286	1.2171e+07	2.14858e+07	1.64458e+07	7.01286e+06	3.85203e+06	1.66615e+07	1.9171e+07	2.19613e+06	1.26126e+07
COL6A2	2976400	5155495	18381150		1.25179e+06	2981020	7195280	1.26011e+07		2.42859e+06	8514220		49522.7	3840300	656613	20310350		4869664	3.41461e+07
COL6A3	7.58541e+07	9.70748e+07	1.06926e+08	5.87149e+07	1.88616e+08	2.17675e+08	1.24735e+08	2.34036e+08	3.1171e+08	3.43601e+08	1.39078e+08	1.58543e+08	2.41234e+08	2.37563e+08	9.55344e+07	9.41566e+07	2.16396e+08	9.47561e+07	2.46939e+08	1.44415e+08
COLEC10	187949			159090		237078	145366		167143		495691						351808		192520
COLEC11	4.16401e+06	4913160	6.27506e+06	7.16006e+06	1341692	8.64006e+06	18986590	2.98701e+06	4.97378e+06	5.7771e+06	1.84568e+07	1.25617e+07	6652730	5.4215e+06	1.12562e+07	5057555	5628660	21720995	5.57779e+06	21730210
COMMD9	3.01255e+06	3.47505e+06	2.26285e+06	4350826	2365870		3.86246e+06		1584254	2.79895e+06	2.29808e+06		3.19285e+06		2691219	2.75265e+06	3.10502e+06	3017512	2718950	2.78199e+06
COMP	254171	188695	164651	394238	1.04564e+06	188880		704429	163286	108394		304403	240506	62743.5	505035	796958	138219	246300	483119	727781
COPB1	1.21159e+06	2.09649e+06	3.44171e+06	7.03932e+06	1641192	4.51872e+06	8.40458e+06	2.49891e+06	682713	6.80566e+06	2.90908e+06	1509774	3.96233e+06	2.6464e+06		2.43557e+06	564723	6.74291e+06	3.65227e+06	4.65865e+06
COPS5	168439
COPS6	104644	2717750	1.54258e+06				1845700						3.54333e+06		3581675	3242410
COPZ1	829897									425753
CORO1B	1.43261e+06	1.14898e+06	3870815	1.67376e+06	811770	1681794	849408	2.44156e+06	1.54542e+06	2644941		1.75282e+06	878637	1410935	2.94801e+06	1.97954e+06	730297	540878	2.43137e+06	3.62172e+06
COX5A	3561484	1607190		2645965	4056690	2589398	4824925	3947549	0	5.9269e+06	3984066		6127345	4.31441e+06	2750730	1.90945e+06	2539895	5764075	3.02821e+06
CP	8.24948e+08	7.79009e+08	9.91388e+08	7.64599e+08	7.90965e+08	9.30881e+08	8.16449e+08	9.9921e+08	8.34336e+08	9.1868e+08	7.68762e+08	8.86131e+08	6.59829e+08	6.87255e+08	9.06274e+08	7.03084e+08	1.04514e+09	8.82867e+08	8.34903e+08	1.07218e+09
CPB1	1038675				950894		6608490	784516			901429	990923			594385	818827	1712635			534206
CPB2	2.09305e+08	1.52175e+08	2.89479e+08	2.60739e+08	2.6272e+08	2.30634e+08	3.49913e+08	2.32755e+08	3.35288e+08	2.47549e+08	1.993e+08	2.46847e+08	1.46393e+08	4.04914e+08	2.92619e+08	3.21909e+07	3.56211e+08	3.51003e+08	1.80245e+08	2.56382e+08
CPD	1216390																1324115
CPM	0	1731880	0		1.24966e+07	935416	662441		11863500		1.02928e+06	140294				6.00854e+06	4592660	2085018	5980675
CPN1	6.35822e+06	1.74997e+07	2.49211e+07	1.05691e+07	9.54452e+06	1.48922e+07	8.61858e+06	8.09714e+06	1.12822e+07	1.04979e+07	1.31968e+07	1.55071e+07	1.09756e+07	1.17169e+07	1.04739e+07	1.44993e+07	1.27191e+07	1.06872e+07	1.20924e+07	7.11411e+06
CPN2	2.39548e+07	3.14969e+07	2.85817e+07	3.82844e+07	2.20938e+07	2.97134e+07	2.63734e+07	2.90857e+07	2.45411e+07	2.94372e+07	2.82335e+07	2.18843e+07	3.07107e+07	2.88325e+07	2.95808e+07	2.68184e+07	2.72523e+07	3.19377e+07	2.77604e+07	2.723e+07
CPNE1	1.58293e+06	2.69466e+06	3.12507e+06	1.58674e+06	2.06032e+06	2.69197e+06	2724376	1.08109e+06	1.52301e+06	2.82001e+06	2274352	1.46946e+06	1.41669e+06		2.87648e+06	2.23073e+06	2.52513e+06	2055200	3.08481e+06	2.77048e+06
CPPED1	261298			318514	46060080					87611.6	357418
CPS1	137937500	1.23364e+08	141683500		311409000	1708860			152766000		146233726	1382460	299748000					2501960		285686000
CPSF2	771355							1150065		2573670
CPT1A	1446354	2.16795e+06	1.84661e+06	1.12341e+06	1.56942e+06	2.23364e+06	1.1238e+06	1.23145e+06	1.57949e+06	1.26182e+06	2.0279e+06	679375	1.18379e+06	1153765	1.39599e+06	1.99867e+06	2.24337e+06	1.0715e+06	1.35932e+06	1540955
CPVL	619210				1502840			1429995						1180300		1.46416e+06		440090
CRISP3	3732205	710413	1.04825e+06	1082380	101569	148962	817765	1.01707e+06	3622400		0	1048930	833907		1.08994e+06	458092	1.19517e+06		563929
CRP	1.74248e+06	2.19083e+06	1.33544e+06	1.51265e+06	1.62596e+06	1.78934e+06	1.74972e+06	2.91445e+06	1.11561e+06	2.15671e+06	2.95385e+06	1.16612e+06	2.01461e+06	3.00666e+06	1.26074e+06	1.15057e+06	1.54649e+06	4.55998e+06	1.38801e+06	1.61602e+06
CRTAC1	3.50282e+07	6.07836e+07	1.33579e+06	5.93692e+07	4.32925e+07	31509813	5.49012e+07	4.47789e+06	838358	2.15825e+06	58079880	5.32713e+06	264590	3.06165e+07	33065525	512056	1.53719e+07	709861	10508717	2.63603e+07
CRYZ	1.18397e+06	1.65918e+06	1.72536e+06	3.71391e+06	1291000	1.28939e+06	1.28175e+06	1.31653e+06	3.74518e+06	1.86521e+06	1.26797e+06	907311	1.29287e+06	4.00342e+06	1.2855e+06	1.01357e+06	1.54452e+06	2.36039e+06	1.26045e+06	1.37547e+06
CS	1722980	2.02425e+07	5.00306e+06	7.05622e+06	1.0149e+07	1.09632e+07	4.73337e+06	2.11691e+07	4.03833e+06	12508860	1.66963e+07	6.10451e+06	2126810	6.10842e+06	2.02023e+07	1.72863e+07	5.86682e+06	9.98543e+06	5.29582e+06	1.38656e+07
CSE1L	2.28331e+07			663821	2.28794e+06		1.25097e+06	2576800	9.26943e+06	2.79819e+06			216981	3.08541e+07		33360450	54770250	3.08304e+07	212252	29812439
CSN1S1	2.81327e+07	1.99496e+07	4.32156e+07	5.71961e+07	7.26153e+07	1.65107e+07	3.06436e+07	7.17584e+07	3.36844e+07	2.80165e+06	1.66884e+07	1.17195e+06	1.71266e+07	4.55528e+07	3.82092e+07	3.96012e+07	3.03383e+07	3.2198e+06	3.15401e+07	3.56992e+07
CSPG4	438032					6044140		3524905		2029026	1.17228e+06					4873700	773408
CST3	1.57567e+06	1.55368e+06	1.36181e+06	2.24524e+06	3.02322e+06	1.43562e+06	2.95881e+06	2.04401e+06	1.87389e+06	3.04499e+06	2.01504e+06	1.61464e+06	2.59597e+06	2.39802e+06	2.34805e+06	1.97692e+06	3.02288e+06	1.97916e+06	2.57896e+06	1.93296e+06
CSTB	2.32398e+06	1.2064e+06	1.64378e+06	2.0681e+06	29342.2	3.20797e+06	1542016	3.06191e+06	1.41038e+06	1.45973e+06	814904	1.4555e+06	1.57142e+06	1.92747e+06	2.12707e+06	1.79117e+06	2.95377e+06		1.37465e+06	1.90958e+06
CSTF1	10209680	13930695	9.68518e+06	7697525	1.04127e+07	19641260	1.09019e+07	2.25354e+07	0	2.11552e+07	10074960	11363400	8857500	7061660	18198500	15130051	10533760	8.32007e+06	10609400	8.95557e+06
CTBP1	520503	730998	581052	461553	823056	676372	909703	468494	718676	941897	759720	1.17069e+06	535403	858328	723466	743919	762948	829908	692018	2.09741e+06
CTBS	4038445	3.26652e+06	644341	143381	271347		2688440				303778						117828			1.57386e+06
CTDSP1	867915															1255670
CTNNB1	8484416	1.3624e+07	1.41692e+07	254618	1.01856e+07	1.30731e+07	29383284	1.55732e+07	2.47955e+07	15151890	2e+07	2.07761e+07	13170500	1.43494e+07	6.85814e+06		11675150	20329310		17712955
CTR9	4.27127e+06	2.19204e+06							851838		3854284		3.26691e+06	2.3462e+06	2.61188e+06		2835960		3641560	3.44984e+06
CTSA	2.65508e+06			3151537	3.21496e+06				2823060	3076578	2.29986e+06	3.06157e+06		1.83945e+06	2.91366e+06				4.27246e+06
CTSD	1.65748e+06	3.74711e+06	3.04415e+06	671375	563464	1.76338e+06	989533	3.06788e+06	1.52059e+06	316269	5.12187e+06	713312	1487525	2.35992e+06	1.00805e+06	1.39472e+06	3720080	2.48154e+06	366290	868437
CTSL	3.66387e+06	11716500	9222044	11344500	7042660	5343616		1.29653e+07	13084350		9.33499e+06	4793575			12112700	1.0136e+07		13954200
CTTN	5.18827e+06	5.49427e+06	5.32317e+06	7.11603e+06	4946280	5.96111e+06	7.44649e+06	4.69909e+06	1.58465e+07	2.75995e+06	4.12121e+06	5.09927e+06		6.84595e+06	3.59651e+06	9.19836e+06	4.06282e+06	3.20313e+06		3.2437e+06
CUBN	4325205	4.41737e+06			4.39123e+06	49805.2			3631785	3093500			5.41487e+06	6727710	6444960		3.93861e+06	3060205	5924260
CUL2	3846347		4.89047e+06	6.33595e+06	3.87648e+06	4166122	3.92484e+06	6068975	4.38625e+06	4.08305e+06	8261475	6995470	2.94384e+06	3.99743e+06	4.45954e+06	3.18286e+06	4.17186e+06	2.96492e+06	3.58678e+06	3.49091e+06
CUL4A	2.33584e+06	1.44603e+07	9320150	14383061		13497450			9164870	1685575	1.38885e+07	17497125	1.35062e+07	19264060	1.34388e+07	0	16273320		9.07866e+06
CUL4B	2033670	1.44603e+07	9320150	14008050		13497450			9164870	1685575	13522760	17497125	1.35062e+07	19264060	1.34388e+07	0	16273320		9.07866e+06
CUTA	283464	354351		195292	504357	370602	331800	279175	441692		349606		293437	364893	426790	397550	430541	460999	433892	307177
CXADR	1.44328e+07	1.02092e+07	2808990	1.29206e+07	1867600	6729050	1.2327e+07	1.00815e+07	1.09292e+07	5503050	1.51e+07	1.17605e+07	2.96875e+06	3.11373e+06	3.6024e+06	4436330	1.16976e+07	1.94821e+07	6.85556e+06	10319680
CXorf38	811345		1.19113e+06
CYB5R1	1566850	1.83845e+06	748939	1.54382e+06	1511370	2.50024e+06		959861	1.18906e+06	5.58947e+06	1596580	480639	2285720	2.05668e+06	2.29591e+06	1.19062e+06	3.40873e+06	872147	1.25368e+06	623585
CYB5R2	5.03525e+06	8204236	5.59428e+06	5.05222e+06		6.56927e+06	6.60031e+06	5.86954e+06	5375300	7645686	5.50817e+06	3.14205e+06	11348200	11779980	12687600	6791343	5091000	15065010	6.33381e+06	6040347
CYB5R3	195172		186994				102688	6269896	79694					76396		171612		92179
CYBA	2.17355e+06						3351450			3691795						1522565
CYFIP2	0	1.81048e+06		917590						260742		1.33785e+06	669842		289549					401751
CYRIA	4672835	4.30698e+06		0		5.44644e+06		7.46629e+06				4.94022e+06				6976584		109123		9311655
DAZAP1	997537	2158000	1.60821e+06	1.55821e+07	1.03484e+06	2.31443e+06	8.14891e+06			1.46101e+06	1.40986e+07	8.4833e+06	6.33338e+06	1.67075e+06	1200530	850045	6.03673e+06	728285		934850
DBH	3.74403e+06	1.45361e+07	2.81754e+06	3.921e+06	3.39725e+06	1.05514e+06	3.06679e+06	3.44598e+06	138202	3.93133e+06	3637059	2.37569e+06	2.83956e+06	2.35551e+06	4.55388e+06	4.9827e+06	4.30971e+06	4.03571e+06	3.18751e+06	6.88893e+06
DBI	3359978	4.31031e+06	4279740	4155130	2803860	3676730	122854	3714270		2086690	157253	3265400	115992	4231650		241789	3800300	4.23167e+06	195442
DBN1	731579									1.09088e+06	943897	833030	957294						870983
DCAF11	621612	344764									285904								112602
DCAKD	1188380	781080	1.16265e+06	1.09235e+06		516772	542937	1.04042e+06	836593	1.09166e+06		807470	1090230	1.28912e+06	1113440	892202	779455	996551	553522	980952
DCD	709155	1.04767e+06	553300	1853675	1.24368e+06	747265	156796	67162.8	0		1186940		182660	819021	1267360	1229237				129472
DCN	130579				145207	5359376					449736	524185				2348260	2238515		5.28742e+06	4872575
DCP1A	1551375
DCPS	89025.9	128374	147159	138706	129048	118041	119406	109666	135529	829160	117505	92584.3	135646	133625	161838	1.04406e+06	904723	102787	114106	292283
DCTN1	7.44669e+06	2.0331e+07	1.10028e+07	1.05322e+07	3.12839e+07	9.73528e+06	9.80506e+06	1.04438e+07	1.09815e+07	1.10916e+07	1.11422e+07	1.15528e+07	1.03259e+07	1.12989e+07	1.33875e+07	3.10969e+07	1.3942e+07	1.28896e+07	1.22093e+07	9.53095e+06
DCTN2	775091	1.21544e+06	1.37584e+06	836034	1.2111e+06	984165	495221	813374	1.49093e+06	972412	1.06091e+06	1113760	1227120	1.25445e+06	789548	683104	5.31507e+06	1.08269e+06	999147	1.28766e+06
DCXR	0												380050
DDX19A	177039		730215					713248		819870		731668		900325				685088
DDX19B	177039		730215					713248		819870		731668		900325				685088
DDX5	829873							975844				181331						425753		440572
DDX58	7269800	1.21579e+07	1.22153e+07	1.07194e+07	10930645	10338200	8413100	1.07957e+07	1.43613e+07	1.10561e+07	1.35042e+07	1.29827e+07	1.06293e+07	12583350	13712300	1.10257e+07	9.51851e+06	8.72934e+06	1.3807e+07	10912300
DDX6	776061							2.66532e+06						5704610
DDX60	0	1.9261e+06	3228760	5.65887e+06	1121507	2.79096e+06	1.4116e+06			4.55522e+06		1.76867e+06		2170700	1331097	1.55364e+06	2.81293e+06		1928730
DGAT1	1044790	1197500														2318510	2402760	2004035		0
DGKA	2841491	3528240		7419695		1.81234e+06		3462985					2.93532e+06	1309305	8560950		7916120	3.57385e+06	2161500	9276340
DHX15	642908	853259	8.30866e+06	1.06367e+06	874641		7312330	1.23831e+07	937459	728670	879332	6.92757e+06	1.32174e+06	695947	571788	1822232	558957	724784	1694848	4.43083e+06
DIS3L2	213431					411523	208189									342496
DLG2	190832											800016
DMKN	450572		603337	410713					0	931650		439816	420518		717249		252488		350000	356736
DNM1L	1.95978e+07	3.33255e+07	39685980	25179300	0		2.2618e+07	3.75484e+07		4.27478e+07		2.88812e+07	3.28672e+07	3.05787e+07	29981780	38714200	3.47848e+07	40050840	3.77732e+07	4.09337e+07
DNMT1	48729000	644655	44208050	1.14022e+07	5.145e+07	2931790	47388825	43898650	1290280	754820	107216	1098835	44320200				3.842e+07	4.35091e+06	18663840	4.35446e+07
DOCK10	261592	205851	181028	225595	274347	194794	146939	320831	310695	248074	253971		206096	318393	391349	213019	462967	492468	1.11008e+06	267220
DOCK5	611463		701749				539726				1075600
DOP1B	556734				357778		463386											389088
DPEP2	1574955	3863350	1.80725e+06	4193800	3367610	2.73335e+06	3371800		2327980	2.67482e+06	1788640		2.50027e+06	4091125	2.95963e+06	1500170	3.06977e+06	3891975	2669560	3.21031e+06
DPT	349727	559268			477684	735034		656873	656494	670242	495933	590879	613407	488328		407872	529002	755875	494057	404512
DPYSL2	193999	226372	195242	454582				327643	548739	1.88828e+06	1.00057e+06	267136	1894580	808496	407184	355566				2003435
DPYSL3	193999			3388.95			801768	327643			1.53832e+06					355566
DRG1	3.03906e+06		2.74256e+06	2.95962e+06		1918250			2.8304e+06	8080716	1.4763e+06	5.05051e+06	4.84176e+06	8118214	4558676	6436148	3.904e+06	9.01652e+06	7.08041e+06	2.23148e+06
DSC1	2500130	7223376	1.52325e+07	5120027	1.0623e+07	4137795	5135010	4271950	1.96998e+07	4.95497e+06		1.40092e+07	6672840	9.08064e+06	5083450	4476670		5.45203e+06	1138126	1.75498e+07
DSG1	643530	1.85471e+08	1.80345e+08	1.23609e+08		1.52953e+08	5.94411e+07	1.49205e+08	110203957	1.04575e+08	126960520	1.64082e+08	83011385	9.26699e+07	1.11641e+08	9.98232e+07	9.52803e+07	118241515	1.10843e+08	4.77827e+07
DSP	3.29147e+07	2.04255e+07	1.72065e+07	8.81408e+07	4.51093e+07	4.61505e+07	4.11157e+07	1.87162e+07	5.90465e+07	2.26954e+07	3.49547e+07	1.99188e+07	1.5506e+07	21327999	2.22884e+07	24944725	4.40384e+07	6.27207e+07	2.68451e+07	1.51856e+07
DST	0		1.66723e+06		142072	686539	0			1379118	2282635	2797540	1194010	1142425	305732		4.07419e+06
DUOX1	143637	547688	92323.5							721062
DUOX2	143637	2.75607e+06	92323.5	4639830	1924195					3.91932e+06		138135
DUT	183866					961307				168553		1.43583e+06	587551	2697620
DYNC1H1	7.62013e+06	3.0849e+08	421856	1.22035e+07	1.01347e+07	1.21355e+07	15463969	8.68546e+06	3.30521e+08	2.58435e+07	8.20548e+06	1.09024e+07	1.16025e+07	6.35411e+06	1.59787e+07	1.35237e+07	1.03814e+07	3.11977e+07	3.03235e+06	2.01964e+07
DYNC1I2	650072	890448					236386	61440500							892580	2.7697e+07	686519		1.01679e+06	510063
DYRK1A	818617					20606													747604
ECM1	6.76712e+06	1.57815e+07	1.08223e+07	1.55749e+07	9.83342e+06	6.97528e+06	1.30722e+07	1.29122e+07	8.42802e+06	1.13836e+07	9.05956e+06	1.12363e+07	7.60941e+06	9.01316e+06	1.34199e+07	7.74317e+06	1.22485e+07	1.43252e+07	7.80428e+06	8.39161e+06
EEF1A1	2.9377e+06	8.70025e+06	2.92299e+06	9.08774e+06	4.09052e+06	1115613	8.92066e+06	1.77273e+07	8.46543e+06	8.89098e+06	1.444e+07	5.09991e+06	1.32699e+07	5.43218e+06	1.11421e+07	4.61793e+06	3.28396e+06	1.09063e+07	1.89264e+06	5.39372e+06
EEF1A1P5	2.9377e+06	8.70025e+06	2.92299e+06	9.08774e+06	3990230	1115613	8.92066e+06	1.77273e+07	8.46543e+06	8.89098e+06	1.444e+07	5.09991e+06	1.32699e+07	5.43218e+06	1.11421e+07	4.61793e+06	3.28396e+06	1.09063e+07	1.89264e+06	5.39372e+06
EEF1A2	2.9377e+06	4.15292e+06		3.33368e+06	4.09052e+06		4.51405e+06	5.26632e+06	4.01123e+06	3.28156e+06	4.41009e+06	3.75969e+06	3.62425e+06	5.17533e+06	4.67209e+06	4.61793e+06	3.28396e+06	5.33931e+06	1.89264e+06	254482
EEF1G	2.14659e+07	12936100			1.69004e+07	14645487		1.90652e+07		459960	1.26846e+07	25458785	7324825		453066	1.12632e+07	1.67914e+07		11589120	2.29089e+06
EEF2	1.95244e+07	3.78988e+07	40793450	32714450	1.28385e+06	376444	5.42351e+06	1.76562e+07	5811300	3.50536e+06	8.42727e+06	1.40509e+07	42771710	1.82472e+07	16955416	2.01687e+07	4.09881e+07	1.86624e+07	1.18788e+07	19139800
EEFSEC	1.78072e+06		760359		582500	875345										678969			653844	822580
EFEMP1	1.7384e+06	1527521	4.16443e+07	580659	2.72983e+07	1.4279e+06	3.80624e+07	1.37591e+06	2.1399e+07	4.09631e+06	2.783e+06	4.23473e+06	941124	949202	3.02227e+06	883285	1.99471e+06	232294	1.72782e+06	804003
EFNA1	1979972	4074774	5538920	3.32323e+06	5767896	3939860	4322672	7325020	5190405	4.83729e+06	5.06644e+06	6228760	3.37373e+06	6692750	3898518	4.27957e+06	4.56344e+06	4.84863e+06	5297410	6985442
EHBP1	3.41897e+06	6219980												2735450					2204935
EHD2	490573			297706			3.20405e+06		625689	5.47999e+06			1661730				374452		325019
EIF2AK2	2.52256e+07				196432	253429							4347735				983177
EIF2AK3	57227400	6.8743e+07		70427300												4.37881e+07
EIF2S3	1.84187e+06	592685		2.00282e+06			327924		1778800	1294335			1727590			371202	579275	2.10836e+06
EIF2S3B	1.84187e+06	592685		2.00282e+06			327924		1778800	1294335			1727590			371202	579275	2.10836e+06
EIF3A	6994780	1.58365e+06	2.7055e+06	5.58605e+06	752464	9.24783e+06	526540	3.31669e+06	5.72364e+06	1.76026e+08	821474	676039	3.01852e+08	355512	1.90599e+06	9.1815e+06	1.66434e+06	900038	988667	1.20034e+07
EIF3C	799978			56002.6							45925.9			547228		390585
EIF3CL	799978			56002.6							45925.9			547228		390585
EIF3E	1086910						0								774128
EIF3F	2.82465e+06	2706196	1.63164e+06	358198	1.51442e+06	1824850	3102770	1.64164e+06		1.37594e+06	1144275	1.68873e+06	665534	1.13529e+06	1756052		136799		962180
EIF4A1	2.78307e+06	1582197	2269610	1920075	3.14987e+06	1821270	1.99113e+06	2.22149e+06	2.74928e+06	2.60475e+06	766092	1794185	6.72393e+06	1.5495e+07	1.53781e+06	783893	2.41954e+06	1.25982e+06	6.63962e+06	3799210
EIF4A2	1.70224e+06	1582197	2269610	2913875	1.80946e+06	1821270	1.99113e+06	2.22149e+06	2.74928e+06	3.36978e+06	766092	1794185	1956424	3.73658e+06	1.53781e+06	783893	3.11056e+06	1.25982e+06	480258	1952000
EIF5A	1918865				1.55308e+06	892315	2001695	1317205	2942980	1.78666e+06	1204855	2494925	1731674	2366090	1762298	772146	1842330	1197190	2.4705e+06
EIF5B	0		1.86781e+07									518161		626603				454193
ELMO1	251564		505081													773933
ELN	4944610	591719		1.63195e+06	324788	1.39225e+06	1.44291e+06	490714	0	2.13261e+06	385094		3478200			20496.9	4253210	1.48505e+06	1.83608e+06	782960
ELOVL5	1176400
ELP1	2443652	4170040		6937670	6.28153e+06	3.75035e+06					4.10363e+06	3362710				3615240	4.66638e+06			5889880
EMC1	379810	414373	292371		457866			298943	184758	286338	121504		313920	260667	203410		213708	246664
EMILIN1	9.93456e+06	1.13202e+07	16237062	9.48113e+06	10320600	9.06677e+06	1.07868e+07	7.67939e+06	1.10951e+07	1.52526e+07	1.10312e+07	9.97724e+06	536893	1.01486e+07	9.48155e+06	265406	1.37093e+07	1.58256e+07	1.07611e+07	1.06019e+07
EMILIN2	1470745							2197760		58308615	431727			1906900	999645		998730	1.82019e+06
EML2	1098580									1137210					12297750	70157.6	6.58333e+06
ENO1	6.24132e+06	1.44901e+07	1.27544e+07	1.35097e+07	4.94946e+07	2.94296e+07	2.11623e+07	5.24672e+06	9.7672e+07	2.27871e+07	6107268	8630560	58831071	5.93107e+07	2.87728e+07	1.77921e+08	2.12127e+07	6.3411e+07	1.37752e+07	1.11507e+08
ENO2	5.85701e+06	1.02939e+07	8.15356e+06	1.14599e+07	1.70246e+07	13356750	13472155	5.03697e+06	7.80255e+06	1.58693e+07	4205748	8424775	1.43733e+07	1.39743e+07	9.57809e+06	9.71586e+06	19865600	1.05503e+07	9.49007e+06	1.14481e+07
ENO3	5.85701e+06	1.02939e+07	8.15356e+06	1.14599e+07	1.70246e+07	13356750	13472155	5.03697e+06	7.80255e+06	1.58693e+07	4205748	8424775	14337174	1.39743e+07	9.57809e+06	9.71586e+06	19865600	1.05503e+07	9.49007e+06	1.14481e+07
ENPEP	15581900	9391950	1.03581e+06	1.90389e+07	10937460	17896100	18430500	17878800	1.26943e+07	11940720	21086200	7071720	1.42077e+07	16713000		18221500	14710160	6.15153e+06	12273480	18752200
ENPP2	6.64394e+07	49462985	2.69099e+07	8.05153e+07	44825450	46394660	5.44626e+07	0	3.40609e+07	7.8762e+07	4.65804e+07	7.71534e+07		114307575	45680970	169382180	4.72978e+07	1082801	4.37459e+07	4.37299e+07
ENPP3	9060700		2.31564e+07	23234000	20125300	18574800	1.45713e+07	12551800	1.57937e+07		1.97513e+07	2.07635e+07	2.00242e+07	15327500	26097900	1.54045e+07		1.73954e+07		7430000
ENPP6	611705							2428330	730795				1447530
EPB41	441247	621996	618010	270888		434067	656218		305614	474703	824296			538754				537722	500995	354746
EPB41L1	320187		963715				2567550						1375007			2574645	23270900	1.66023e+06	2.06501e+06
EPB42	80823000	95345000	208454000	184101842	196341000	189808000	98255500	96008500	200208250	102742500	235320600		177705000	5.66842e+07	519997	193209000	95755000	192173000	211062000	200305000
EPCAM	2196395	1702875		916635	834148			239258		1.03057e+06	0	752507	788623		649665	659407	3320880	247042
EPHA4	2.4667e+06							5356870	3717265				16466.6	2.75617e+06	0	1400647	4991170	3986648	3.34306e+06	2.99863e+06
EPHB3	0	486882							0
EPHX1	2544750	1.99056e+06	330911			2.91628e+06	3080055	1300558		2.23305e+06			5.607e+07		1.77416e+06	3845250	2854480		316459
EPPK1	3494435	6.20045e+06	3.36387e+06	1.0185e+07	12883160	1.22698e+07	5.2929e+06	7.80166e+06	5.01314e+06	4.28261e+06	6352302	8.08282e+06	9.92977e+06	4536320	9.69991e+06	3182400	4.7657e+06	9743190	5339218	5.1166e+06
EPRS1	436979	331711	119046	2.48363e+06	3356254	695333	164131	406491	174460		453474	365867	794987	2.27892e+06	1.34801e+06		949878	1.19533e+06	1.54076e+06	89687
EPS15	3722790		5.14136e+06	3.45736e+06	2582972	5.38136e+06				3763615	2264300	5.04022e+06	2.78415e+06	5.85207e+06	1.88934e+06			3967020	2.88234e+06	1.24284e+06
EPS15L1	322908						255732									318778	175152
EPS8	170506	16005800	10918645		6646250	0		15265300	6971450	16651700	8373200	12186600	12202660		9555200	12724500	8148100		14755300
ERAP1	8.36413e+06	2.12083e+07	8.72417e+06	2.34869e+07	2.2971e+07	2.30952e+07	6.58967e+06	2.52573e+07	1.39796e+07	1.18785e+07	1.68044e+07	1.90336e+07	2.60378e+07	7.02274e+06	2.27562e+07	2.63983e+07	1.50153e+07	1.17989e+07	2.23003e+07	1.32479e+07
ERAP2	1.90909e+06	1.3422e+06	1485530	2954030		3040975		2114650	1.98039e+06	2.93014e+06	2213410	1.77191e+06	1252250	1.72298e+06	1.755e+06	3.56616e+06	2.13698e+06	2722894	2.64116e+06	2177130
ESD	945704	1.31263e+06	1.43913e+06	1.17006e+06	1.28038e+06	5.60368e+06	1.37631e+06	1.12214e+06	1.6706e+06	2.42183e+06	3.84559e+06	1.18294e+07	3.04566e+06	2.49091e+06	1.36418e+06	1.19737e+06	2.65226e+06	1.38087e+06	923581	1.44589e+06
ESF1	5.93185e+06												1.77429e+07						4.36807e+06
EVPL	37102300		18097612				1.31581e+07				9211300	4296800					1.72611e+07		1.84281e+07
EXOC3	5.10024e+06	6.61444e+06	4.29101e+06	6.82811e+06	6.45646e+06	6.10045e+06	6.20085e+06	6.10335e+06	5.56479e+06	7.57708e+06	4.44976e+06	6.32204e+06	6.48816e+06	7.62713e+06	7.30815e+06	5.99604e+06	7.28589e+06	6.37864e+06	7.23864e+06	5.50021e+06
EXOC8	218543					2.74304e+06	178624				553306					5545805		251134	881685
EXTL2	230104	494988	399520	610782	761018	1.10939e+06	633303	1012870		1.71352e+06	928548	1.01203e+06	539716	2.30114e+06	472416			369036	771359	647770
EZR	2.19024e+07	1.36577e+07	1.83592e+07	2.83052e+07	1.04473e+07	2.47596e+07	5.5512e+06	1.48226e+07	1.94636e+07	1.62816e+07	2.43639e+07	1.8094e+07	1.45685e+07	5.08916e+07	2.6011e+07	2.56046e+07	2.78498e+07	6.7785e+06	1.35298e+07	1.96792e+07
F10	3.03436e+07	3.35418e+07	3.70104e+07	2.64218e+07	3.71772e+07	3.14887e+07	3.29192e+07	2.80696e+07	3.77313e+07	3.21021e+07	2.88905e+07	3.00234e+07	3.32949e+07	3.51028e+07	3.47084e+07	2.99703e+07	2.45036e+07	2.66166e+07	2.22531e+07	3.46187e+07
F11	1.20175e+07	1.1728e+06	1.7077e+07	4.92153e+06	1.61557e+07	1.58871e+06	9.28906e+06	1.09845e+07	1.626e+07	1.31607e+07	1.6515e+07	1.14601e+07	1.50858e+07	3.3723e+06	1.82625e+07	1.89875e+07	7.16692e+06	1.15151e+07	1.68117e+07	1.49393e+07
F12	7.74679e+06	8.70744e+06	9.62048e+06	1.05895e+07	9.94209e+06	9.7987e+06	8.40627e+06	9.1032e+06	9.20207e+06	8.28762e+06	8.17741e+06	7.08336e+06	9.65085e+06	1.0376e+07	9.46011e+06	8.62974e+06	6.59942e+06	1.191e+07	9.69206e+06	8.74859e+06
F13A1	3.57598e+07	4.37504e+07	3.05639e+07	4.12504e+07	4.78037e+07	3.56897e+07	4.22355e+07	6.74825e+07	3.16894e+07	4.61918e+07	4.38506e+07	5.80814e+07	4.18275e+07	5.04332e+07	6.76436e+07	4.23567e+07	5.0466e+07	5.51164e+07	2.50839e+07	3.37749e+07
F13B	1.80226e+06	1.46335e+06	2.37801e+06	1.95583e+06	2.72902e+06	1.77772e+06	9.63983e+06	2.24654e+06	2.08927e+06	1.9986e+06	1.88803e+06	2.20285e+06	1.81892e+06	1.61903e+07	2.25433e+06	1.69448e+06	2.22262e+06	2.43423e+06	2.41785e+06	1.1686e+07
F2	1.57632e+08	1.6186e+08	1.8181e+08	2.12522e+08	1.74849e+08	1.63949e+08	1.74924e+08	1.44889e+08	1.75542e+08	1.83778e+08	2.65999e+08	1.59231e+08	1.51006e+08	1.9169e+08	1.70704e+08	1.57418e+08	1.80741e+08	1.77365e+08	1.60909e+08	1.81015e+08
F5	2.76101e+08	2.17908e+08	2.12961e+08	3.20176e+08	2.89861e+08	2.36512e+08	3.55237e+08	2.75867e+08	1.58458e+08	1.78751e+08	3.1412e+08	3.04046e+08	1.9127e+08	2.17162e+08	3.114e+08	3.07824e+08	1.37508e+08	3.49118e+08	3.74185e+08	2.38717e+08
F9	4.09588e+07	2.25159e+07	4.78068e+07	2.24745e+07	3.93156e+07	3.8173e+07	3.71444e+07	4.77969e+07	5.24333e+07	3.84722e+07	2.52862e+07	880782	2.14514e+07	4.77467e+07	4.49225e+07	1.7831e+06	3.87452e+07	3.75343e+07	4.61712e+07	2.00462e+07
FABP1	11798150	8499000		1.24941e+07	7.95763e+06	2.13052e+07	4.13193e+06		12745400	10600550		5.88252e+06	12281200	6016550	6195450	9469350	1.5212e+07	6797850	8.04393e+06	3177250
FABP4	993273																3145970
FAH	7788300	0			2397484	5.63997e+06		5501588		167788	439720	3476192			6.59509e+06	5787128	701427		5.59657e+06
FAM3D	906421		1425380							1.97345e+06		1080365
FARP2	1236520						150646												4.66378e+06	5718300
FASN	33409001	1.95129e+07	3.54379e+07	2.77871e+07	26460830	2.3032e+07	2.71727e+07	2.174e+07	1.85909e+07	3.15207e+07	30051220	39153553	3.45288e+07	3.59989e+07	3.29941e+07	4.29371e+07	2.53277e+07	2.85144e+07	2.61076e+07	2.80854e+07
FASTKD5	1.01716e+06
FBLN1	7.59037e+06	9.27898e+06	1.29286e+07	8.95194e+06	9.51685e+06	1.28325e+07	9.11345e+06	1.10307e+07	1.12169e+07	1.00229e+07	1.12126e+07	9.41478e+06	1.06245e+07	7.96732e+06	9.73604e+06	8.6991e+06	4.01278e+07	1.05849e+07	8.5473e+06	4.29843e+07
FBN1	1.2543e+06	2.45687e+06	2.1141e+07	7.23214e+06	6.21769e+06	2.52296e+07	1.01452e+07	1.00056e+06	933595	3.11197e+07	4.53731e+06	2.13708e+06	2.12625e+07	1.74834e+06	1075715	6.99056e+06	910598	3.01305e+06	1.18208e+06	1.66554e+07
FBN2	1.42055e+07	1.71828e+07	1.09262e+06	25186027	2.048e+07	779131	900116	2.06915e+07	2.69084e+07	1.15864e+06	1.21802e+07	1.12391e+06	765120	1.44414e+06	11336060	2.0713e+07	9.96566e+06	1.06587e+06	962907	1.08452e+06
FBP1	840116				5311825					390338			374998	564288		477999				217381
FBXO4	567107	189118													242981
FCGBP	636992	2.88029e+06	8.71283e+06	900294	9.37614e+06	4.53037e+06	4.33638e+06	698718	3.10187e+06	2.28273e+06	3.39296e+06	454450	3.2615e+06	1.84893e+06	3.05793e+06	9.81446e+06	3.25402e+06	2.90353e+06	1.62315e+06	1.9634e+06
FCGR3A	2.71541e+06	2.634e+06	6.41759e+06	8.64356e+06	7.27991e+06	3.14681e+06	5.44389e+06	3.81768e+06	4.85395e+06	1.08426e+07	1.07261e+07	6.89028e+06	5.57877e+06	1.07705e+07	6.62419e+06	6.93923e+06	4.28069e+06	9.56239e+06	4.78727e+06	4.99957e+06
FCGR3B	7129325	2030954	5.58902e+06	8158950	6810520	2638768	4978860	3134502	4243566	9943789	3423953	6429760	5024555	18197560	5841600	6.30501e+06	18317860	1.30982e+07	6057405	4176934
FCN1	117852	313569				219932	446742	326789		358141		481141	423680	545915		159664	844771			675054
FCN2	1.93394e+06	2.80907e+06	1.66054e+06	1.35658e+06	2.12997e+06	1.40287e+06	5.33097e+06	1.0004e+06	2.1134e+06	1.51875e+06	1.61837e+06	1.8987e+06	1.33657e+06	1.85432e+06	1.58844e+06	946221	2.15989e+06	1.10858e+06	1.11119e+06	1.759e+06
FCN3	1.8147e+07	1.85132e+07	2.91901e+07	2.67842e+07	2.10464e+07	2.83225e+07	2.75012e+07	2.52008e+07	1.94009e+07	2.16103e+07	2.57899e+07	1.626e+07	2.39685e+07	2.90612e+07	1.97922e+07	1.52132e+07	3.17052e+07	2.38195e+07	2.19776e+07	2.7609e+07
FCSK	124017	252264	380940	178654	316073	376952	271027	346353			337189	337741	375093	315041		373831	242826	224528		376083
FDX1	20380050	28502500	3.01077e+07	35018950	5.55423e+07	2.18039e+07	27902536	44645200	20345450	40914100	33700075	29343100	30339500	29082725	1.28652e+07	22515780	3.92524e+07	1.2556e+07	31484150	24595100
FEN1	1.5202e+06										1.10861e+06		1207140		1.27015e+06	644376
FER1L4	1.43261e+06	1.14898e+06	3870815	1.67376e+06	811770	1681794	849408	2.44156e+06	1.54542e+06	2644941		1.75282e+06	878637	1410935	2.94801e+06	1.97954e+06	730297	540878	2.43137e+06	3.62172e+06
FERMT3	1.69594e+07	227950	608166	4.42527e+06	26340700		3.30109e+06	4.60382e+06	1.65344e+07	1.888e+07	1.51659e+07	1.77136e+07	1.75671e+07	2.87146e+07	1.48206e+07	2.5468e+06	24189950		1.56025e+07	4.46941e+06
FETUB	2.97486e+06	2.77741e+06	3.09814e+06	3.39463e+06	3.59516e+06	3.028e+06	2.95761e+06	3.15729e+06	4.13659e+06	2.93136e+06	3.1117e+06	2.12912e+06	2.73525e+06	2.96474e+06	3.53326e+06	2.29581e+06	2.79171e+06	3.00878e+06	2.76185e+06	2.58644e+06
FGA	1.80621e+09	2.22806e+09	2.2992e+09	2.2617e+09	2.28749e+09	2.12709e+09	2.05318e+09	2.13537e+09	2.23564e+09	2.2319e+09	1.98928e+09	1.76343e+09	1.95465e+09	2.33078e+09	2.12029e+09	2.11324e+09	1.97717e+09	2.23602e+09	1.91227e+09	2.1871e+09
FGB	2.27416e+09	2.58452e+09	2.89359e+09	2.61059e+09	2.516e+09	2.36819e+09	2.24148e+09	2.58918e+09	2.61359e+09	2.59905e+09	2.58987e+09	2.3141e+09	2.31101e+09	2.72208e+09	2.71809e+09	2.54937e+09	2.42534e+09	2.41058e+09	2.32745e+09	2.48778e+09
FGG	1.00978e+09	1.13423e+09	1.06205e+09	1.10891e+09	1.09037e+09	1.02961e+09	1.05398e+09	1.09907e+09	1.03498e+09	1.2026e+09	1.00817e+09	9.41608e+08	1.07134e+09	1.17445e+09	1.25489e+09	1.01311e+09	1.07211e+09	1.17308e+09	1.03222e+09	1.04785e+09
FHOD1	209562				748744					678801		526494
FKBP9	5.16008e+06	4.28738e+06		586032	651895		3.21351e+06	489619			62893	5.77235e+06	1.20543e+06	863004		836634		3175130		280208
FLAD1	4329595			0	7442050	1503545	6179280		38267.6		2571760	3651708		9.11714e+06	3181585	2807865	7232620
FLII	382861	846073	115952	1.32595e+06	993102	269841		735367	610985	892730	3.3062e+06	418591	619146	290721	609182	387166	721869		881464	1244025
FLNA	3.09832e+07	5.24276e+08	1.8783e+07	2.47659e+07	1.38098e+08	2.58505e+07	2.51856e+07	2.62435e+07	2.51366e+07	2.06763e+07	1.60926e+08	1.09226e+07	8.97662e+07	3.31595e+07	9.92576e+06	3.43224e+07	2.21489e+07	1.66219e+07	2.51588e+07	3.00841e+07
FLNB	6.399e+06	4.82066e+06	1.35619e+07	9.7054e+06	1.12262e+07	4.26997e+06	9.68765e+06	1.48504e+07	1.12499e+07	1.26049e+07	2.94829e+07	7.61384e+06	1.56854e+07	2.1986e+07	8.28277e+06	1.19003e+07	8.59975e+06	1.01815e+07	1.6685e+07	7.46868e+06
FLNC	1.10226e+06	2.54723e+06	1.67052e+06	4.9615e+06	6.29679e+06	3.79748e+06	3.30591e+06	9.21253e+06	1.07514e+07	5.46843e+06	4.37647e+06	1.04184e+06	1.53667e+06	2.3908e+06	5.14399e+06	1.13496e+06	1.24391e+07	8.24243e+06	8.55437e+06	2.11708e+06
FLYWCH2	84434.5																167619
FN1	3.52669e+08	4.9836e+08	4.19986e+08	4.58344e+08	3.81455e+08	4.05497e+08	4.31414e+08	4.65119e+08	4.2086e+08	4.37855e+08	4.7742e+08	3.5851e+08	3.72982e+08	4.79595e+08	3.9727e+08	3.68045e+08	4.50824e+08	3.88609e+08	3.7871e+08	4.40931e+08
FN3KRP	1009369		2312270	1.09707e+06		1191095				0		1869700
FNBP1	569807	391120	455101					1.32554e+06				1.84957e+06			1047990	1.6778e+06			588964
FNDC3A	5.18648e+06												14554667
FNTA	456848									26120.5
FRMD8	3439105								5078830						4460265
FSTL1	223008
FTL	1.07692e+06	19591050	5.96058e+08	1.07506e+06	582066470	1.51189e+06	1.60195e+07	1.63235e+07	2383820	903294	2.07637e+06	2.7549e+07	2.73281e+08	643586	13388420	824415	6.843e+07	6.9404e+06	1062626	595103365
FUBP1	189886	1.49496e+07	1.51814e+06	553196	235485	569926	200740	370960	253009	258771	179564	3.12582e+06	4.04893e+06	1.72185e+07	2.70885e+06	1.22702e+06	4.91173e+06	725729	1.55872e+07	172242
FUBP3	5.94949e+06	4.90044e+06	7.0571e+06	7.79209e+06	235485	6.15839e+06	6.61839e+06	7.51404e+06	8.81266e+06	7.97762e+06	6.18409e+06	7.51649e+06	5.21713e+06	5.4135e+06	8.65308e+06	7.24979e+06	5.72817e+06	7.13863e+06	5.81713e+06	6.01558e+06
FUCA1	117405				156114		813495	108496		56768.5	92187		90832.2		360359	68416.6		70737.8	269771	151429
FXR1	13266294	1.23215e+07	13634300	651100		1.33945e+07	10945600					1597316	3.50497e+06			708164	18900745			937630
FYCO1	847606			1.03471e+06		497107	1.46674e+06		771729		585706		1192048			1.05871e+06	1.3915e+06	995754	1.02977e+06	1.42553e+06
G6PD	2.02492e+07	38071470	31144645	500919	25633600	22717500	17222200	2.0016e+07	1.83829e+07	2.85567e+07	3.45079e+07	27976600	29438395	13359400	29999900	2.77995e+07	2.32251e+07	34960650	29024200	1.10025e+07
GAA	8.4083e+07	1.18932e+08	1.35774e+08	253943970	1.71415e+08	1.60487e+08	1.51405e+08	1.37534e+08	1.13531e+08	164223600	1.22526e+08	1.12578e+08	8.80297e+07	1.22134e+08	1.13995e+08	47613300	7.94531e+07	2.49667e+08	69868215	124064070
GAK	3033930	4761200	7652710	5330070	4838364	2.12293e+06	3988608	0	10191520	3.65321e+06	3.47256e+06	5.31639e+06	6.1777e+06	1.27655e+06	5.9047e+06	3501534	7.89138e+06	7.42481e+06	1.40223e+06
GALE	1.14531e+08	9439845	1.23842e+08	2601750000	2629985000	4838104	4213395	1.70963e+08	1694681990	1.80231e+08	2718060450	2724618875	6384555	71873	1895552200	9614190	1.8496e+09		4.67179e+06	2694032130
GALNT7	5445740	10345900		1.71407e+07		13187150	1.34784e+07	1.30298e+07	5845505	1.94731e+07	5398980	9245585	22490200	595026			8.37953e+06	443354	10669020	22972000
GANAB	3433260		123574	3.40319e+06	8.12143e+06		4.62525e+06	2.50746e+06	1.12235e+07		9.14842e+06	1.53553e+07	127298	6.16062e+06	9.97863e+06	7259070	6.71824e+06	7.77999e+06	274119	3.78467e+07
GAPDH	5617429	7.05972e+06	2.45336e+07	3.9817e+07	3.09223e+07	1730924	7.86162e+06	3.19492e+07	4354546	9806340	2.17215e+07	6.69827e+06	2.90792e+07	3.90263e+06	4.7317e+06	3.26367e+07	1.12176e+07	3.72627e+06	5.1464e+06	1.35303e+07
GARS1	581811								926444		909344		1.64493e+06	542500	1170425		1446970	1081185
GAS6	9.62309e+06	7.02427e+06	16750280	1.35493e+07	8.27531e+06	8641850	5103450	1.9375e+07	1.47599e+07	10963650	1.08497e+07	6.86917e+06	10874535	20615138	10113800	8.59383e+06	1.28298e+07	9.56012e+06	11079630	5489600
GATM	12709615		14527204	723687	1.09216e+06		1.23015e+07	2334193	13987690				1.36444e+06	1275420	4.43014e+06	1.64436e+07	735440	1660880	970459	1427605
GBP4	367182						174060
GC	3.55784e+08	8.7086e+08	9.8467e+08	4.33665e+08	3.85999e+08	6.57665e+08	3.89233e+08	6.03761e+08	9.38631e+08	7.51202e+08	4.66882e+08	9.60492e+08	4.45567e+08	4.4138e+08	4.747e+08	3.92754e+08	5.56956e+08	4.89594e+08	7.19534e+08	4.14742e+08
GCLC	2.55423e+06	462644	3.22918e+06	1825394	9.25666e+06	5.81683e+06	1.24142e+06	2.58989e+06	4040546	6.87014e+06		7.3686e+06	6.46688e+06	3.2374e+07	3.15969e+06	5.50652e+06	9.43424e+06	2.79841e+06	2.52861e+06	474689
GCN1	221065						1443585			188098								2550630
GCNT3	1142545																			193980
GDI1	3.42311e+06	1.18899e+07	5.97751e+06	6.09217e+06	1.24387e+07	1.4674e+07	1.15851e+07	6.08507e+06	1.20813e+07	4.40516e+06	1.21915e+07	1.03658e+07	3.52608e+06	1.63345e+07	6.275e+06	9.5658e+06	1.19727e+07	6.52843e+06	1.17438e+07	9.03051e+06
GDI2	5.50638e+07	5.14907e+07	7.97225e+07	7.04978e+07	9.55027e+06	6.82976e+07	5.34871e+07	6.21304e+07	5.80882e+07	7.81452e+07	7.91447e+07	7.51377e+07	3.23361e+07	8.85384e+07	7.75702e+07	9.24497e+07	9.61042e+07	5.57194e+07	9.31091e+07	6.94885e+07
GET3	2.77462e+06	3.68142e+06	4.43519e+06	2.54746e+06	3.73938e+06	4.66248e+06	3.41951e+06	4.80963e+06	4.54913e+06	4.35898e+06	5.30761e+06	3139288	8.98114e+06	3.59947e+06	3.86945e+06	3.09685e+06	3412346	3.98914e+06	3.57162e+06	3.34811e+06
GFAP	2175580	3.15538e+06	3392720	1.10223e+07	1.4121e+07	2801612	2430938	1.024e+07	1.54402e+07	3.47177e+06	1868427	7.60885e+06	8.71192e+06	1.36877e+06	19937214	2.39595e+06	1602330	3.3427e+06	1795862	3.03201e+06
GGCT	3.66393e+07			4.99967e+07		4.12404e+07	666298	1241330		20379700	41861040	3.39057e+07	3.90278e+07	38497495	4.41261e+07	40660664	2.37739e+07			3.85991e+07
GGH	249760		941619	1.61252e+06	304724	463708	469300	363736	741462	2.23831e+06	438717	5.54119e+06	796081	244210	697816	1.5859e+06	439904	621330	1.63423e+06	1.71001e+06
GGT1	7.99257e+06		7.14319e+06	1.26542e+07	9684400	9.96421e+06	1.08271e+07	1.29478e+07	1.09539e+07		1.14086e+07	9500260	9.28765e+06	9.27876e+06	4.6348e+06		1.57339e+07	5964070	8.6738e+06	1.52362e+07
GGT2	7.88703e+06		7.14319e+06	1.26542e+07	9684400	9.96421e+06	1.08271e+07	1.29478e+07	1.09539e+07		1.14086e+07	9500260	9.28765e+06	8.60766e+06	4.6348e+06		1.57339e+07	5964070	8462980	1.52362e+07
GGT3P	7.99257e+06		7.14319e+06	1.26542e+07	9684400	9.96421e+06	1.08271e+07	1.29478e+07	1.09539e+07		1.14086e+07	9500260	9.28765e+06	8.60766e+06	4.6348e+06		1.57339e+07	5964070	8.6738e+06	1.52362e+07
GGTLC2	105538																		210816
GGTLC3	105538																		210816
GIMAP1	2.12666e+06					0									1.23363e+06	1.09301e+07		47650.3	5.51047e+06	2403370
GINS3	580081	1.36396e+06		1022735	981232				455096	1776630	1.84626e+06				1933952	1.35647e+06		1811480	387949	1558660
GIT1	812949	1088754	1100365	705974	670315	2.65111e+06	1.65733e+06	2899410	2.0724e+06	2258711	1.88299e+06	1.16411e+06	622152	1620138	1.46396e+06	1.02106e+06	2340517	2.64052e+06	1.42614e+06	1.38415e+06
GIT2	128880	198658				134560						294163		237559	209474	359312			297872
GLDC	3.76157e+07	4.07817e+06	1.80765e+07	1.65153e+07	3187080	2.72695e+07	26860150	7.12136e+06	2.48868e+07	4.22079e+07	2.43602e+07	6.78362e+06	15775250	3.17754e+07	25583500	20517800	2.02787e+07	1.64381e+07	33635550	14599405
GLG1	776190		8762310	608472	409743		662368		650232		927679	853511	2.13316e+06		976489		1.15618e+06	2.44505e+06	3998138	553270
GLOD4	2.20364e+06				4247040			0				2.89434e+06		2.4427e+06			3091910			2.93962e+06
GLUD1	1.04015e+07		19669400	13875800	1.93132e+07	1.51862e+07	109829	1.14186e+07	1.37151e+07	7.12773e+06		1.37386e+07	2.23267e+07	1.75927e+07	9.45817e+06	1.41601e+07	1.66197e+07	2.30601e+06	2.43425e+07	1.34533e+07
GLUD2	5.20075e+06		9834700	6937900	9.65661e+06	7.59312e+06	54914.4	5.70931e+06	6.85757e+06	3.56387e+06		6.86929e+06	1.10348e+07	8.79637e+06	4.49364e+06	7.08003e+06	8.30984e+06	1.15301e+06	1.20988e+07	6.72664e+06
GMPS	0	2838420	2577350	2.06237e+06	4.36262e+06	2411695	2962370	1667380	3126600	3.97756e+06	2.74425e+06		2078650	1.60808e+06			2.70911e+06			4.54578e+06
GNAI1	34005.4		117140		752.747	66405.5		0			78821			70735.9						62123.2
GNAI2	34005.4		117140		752.747	66405.5		0			78821		2118870	2.02531e+06				235196	2302635	62123.2
GNAI3	34005.4		117140		752.747	66405.5		0			78821			70735.9						62123.2
GNAL	34005.4		117140		752.747	66405.5		0			78821			70735.9						62123.2
GNAO1	34005.4		117140		752.747	66405.5		0			78821			70735.9						62123.2
GNAS	68010.7		234281		1505.49	132811		0			157642			704493			712342			124246
GNAT1	34005.4		117140		752.747	66405.5		0			78821			70735.9						62123.2
GNAT2	34005.4		117140		752.747	66405.5		0			78821			70735.9						62123.2
GNAT3	34005.4		117140		752.747	66405.5		0			78821			70735.9						62123.2
GNB1	314198	692435	22665.2	673670		696035	468268	393728	114067	631362	3.5925e+06	253390			721428	212289			806052	565446
GNB2	314198	692435	22665.2	673670		696035	468268	393728	114067	631362	3.5925e+06	253390			721428	212289			806052	565446
GNB3	314198	692435		673670		696035	468268	393728	114067	631362	786558	253390			721428	212289			806052	565446
GNB4	314198	692435	22665.2	673670		696035	468268	393728	114067	631362	786558	253390			721428	212289			806052	565446
GNPDA1	0	2568720		232032			265693		670980				6306040		331600
GNPDA2	471866			232032			265693								331600
GNS	335266	1.13696e+06	1524080	918194	387607	1154430	714989	1010905	427740	1.0408e+06	1092940	844229	533575	658481	1.26432e+06	615350	613845	1.2781e+06
GOLGA4	254462											102059
GOLGB1	2093625	2.32965e+06	2.02809e+06		1.8316e+06	825131		5118790		5.74431e+06								722237		4509270
GON7	807549	1.04965e+06	1.59257e+06	1.08555e+06	1.1035e+06	857045	985594	444517	951203	837503	1.47477e+06	1268428	651092	1.51208e+06	382305	1.36894e+06	969796	1.09625e+06	1.21238e+06	1.10918e+06
GOSR2	618142	873928	618744	1.21794e+06	782801	869624	889180	915433	324455		868836	495537	749289	665333	1.69529e+06	1.67315e+06	848078	1.3807e+06	701881	189417
GOT1	82225.7	224175			590674	228494	471642	839884	1099570		1392120			19141540	244929	5.56115e+06	1767025	354707
GOT2	2082210	2.49916e+06		256818				863055			358487	934544				2453875
GP1BA	202902	227445	293068	286780	9.52577e+06			393862	368508	323026	217380	155342	208320	186086	232564	367555	469451	253100	236996	454395
GP2	277194		198686		593882	275390							469304		419732				664778
GPC1	0		1.7243e+07			3196390					37985.2		60748.7	206351	11504100
GPD2	0	3.07625e+06	893460	3.6087e+06		3.13873e+06	2.74002e+06	3.96868e+06	6050856	3.2429e+06	994012	2.22272e+06	503535		3.67328e+06	966497	742131		675785	610566
GPI	8.7111e+07	7.81989e+06	1.04255e+07	1.68051e+07	11632000	1.42285e+07	7.75917e+07	4.61601e+07	2.49688e+07	9.93224e+07	8.06449e+07	7.86492e+07	20526716	8778420	1.28727e+07	1.27042e+07	5510000	8.45423e+06	7359650	1.01322e+08
GPLD1	2.44897e+07	4.02294e+07	2.91579e+07	3.58606e+07	2.13812e+07	2.14361e+07	2.27976e+07	3.07047e+07	2.40706e+07	5.06713e+07	2.74383e+07	2.76115e+07	3.87775e+07	2.6432e+07	1.56095e+07	2.27962e+07	2.36665e+07	2.30286e+07	2.34506e+07	2.67378e+07
GPX3	1.18874e+07	2.92916e+07	2.52378e+07	2.21603e+07	2.35594e+07	2.31928e+07	2.19563e+07	2.35394e+07	1.91307e+07	1.68835e+07	2.6731e+07	1.89352e+07	2.60888e+07	2.58356e+07	3.02356e+07	3.15163e+07	2.72727e+07	4.50989e+07	2.92048e+07	2.38904e+07
GSDMD	2.12446e+06			3332140	3874406	3.04103e+06	3.04245e+06	4812625	3.52415e+06	3037520	4664930	2997423	3268380	2424580	3.31747e+06	2.8103e+06	5319955	4.39349e+06	3.21635e+06	4.15031e+06
GSN	1.31757e+08	1.50487e+08	1.54534e+08	1.57685e+08	1.71919e+08	1.28149e+08	1.24023e+08	1.53375e+08	1.40303e+08	1.5415e+08	1.55352e+08	1.82477e+08	1.59169e+08	1.41753e+08	1.45887e+08	1.42004e+08	1.30705e+08	1.47371e+08	1.2083e+08	1.38646e+08
GSPT1	549914			5.33435e+07				64463800		2.44945e+06	53096625	36932250				85430000		39202250	789319	38739000
GSPT2	549914			5.33435e+07				64463800		2.44945e+06	53096625	36932250				85430000		39202250	789319	38739000
GSR	3.79395e+06	251670	4.60595e+06			8436000	4.84821e+06	5666007	1.5998e+06	7995440	1121940	97030	5.95655e+06		7.17721e+06	245797	5460360	135576	348189	6.27494e+06
GSTA1	6.57113e+06	3.08455e+06	3.86185e+06		3967080	2.59877e+06	2.23412e+06	4411800	4.78428e+06	4.06535e+06	1.85435e+06	1.23207e+06	3.74378e+06	3691375	6.06007e+06	4965170	1598455	3.36052e+06		1.96685e+06
GSTA2	6.57113e+06	3.08455e+06	3.86185e+06		3967080	2.59877e+06	2.23412e+06	4411800	4.78428e+06	4.06535e+06	1.85435e+06	1.23207e+06	3.74378e+06	3691375	6.06007e+06	4965170	1598455	3.36052e+06		1.96685e+06
GSTA3	363636								512859				696766
GSTM1	1.38651e+06	858848	1.25579e+06	1.90825e+06	2.16476e+06	1.55713e+06	1.32026e+06	2.30015e+06	946029	1.70098e+06	1.48872e+06	1.32767e+06	1.30283e+06	1.35511e+06	1.06832e+06	1.7209e+06	1.92865e+06	1.46911e+06	1.80251e+06	1804570
GSTM2	1.38651e+06	858848	1.52059e+06	1.90825e+06	2.16476e+06	1.55713e+06	1.32026e+06	2.30015e+06	946029	2.40443e+07	1.48872e+06	1.32767e+06	1.58595e+07	1.35511e+06	1.06832e+06	1.71596e+06	1.92865e+06	1.46911e+06	1.80251e+06	1804570
GSTM4	1.38651e+06	858848	1.25579e+06	1.90825e+06	2.16476e+06	1.55713e+06	1.32026e+06	2.30015e+06	946029	1.70098e+06	1.48872e+06	1.32767e+06	1.30283e+06	1.35511e+06	1.06832e+06	1.7209e+06	1.92865e+06	1.46911e+06	1.80251e+06	1804570
GSTO1	157729600				3416600		19461400	19238		1.88628e+06	22960300		3183390	2050485	2773232			4.10359e+06
GSTP1	7797650	1.43855e+07	1.40053e+07	1.08948e+07	28405050	1.70007e+06	8.23277e+06	6334534	590185	14436380	1.70917e+07	1.22853e+07	1.09409e+06	8.05335e+06	6879250	5134480	4.18088e+07	33490850	17556370	1.33961e+07
GTF2A2	794315	206151	354668		1426000	1.11935e+06	1000410			1463070			1.09459e+06		850787	1.0489e+06		784265
GTF2I	14940800	2.69476e+07										28119000				20553040				3880775
GTF3C1	0						402096
GTPBP1	319166	618269	1.12379e+06	549097	706749	498520	1222240	942550	928195	393149	739127	319485	590890	1369684		560464	748043	997528		644825
GTPBP4	1902275					455998										7921405
GUSB	1.27965e+07	3.96306e+06	4128235		7525350			6410170		570262				633938	3141580	2202745			6.78304e+06	546259
H1-0	1.18613e+08	7.09269e+07	76587350	1.02308e+08	8.99885e+07	7106850	201232150	104103475	109641250	1.35594e+08	86220480	5653750	7.65006e+07	106085020	9.82719e+06	7.85274e+07	90495160	91005560	7.53072e+06	54361519
H2AC1	24992.9	19257.1	30704.2	905434	109053	119975	39240.3	320627	22083.9	100334	22627.8	59415.2	41480.1	123232	176264		1.16041e+06	85976.9	36325.1	56415.5
H2AC11	24992.9	19257.1	42735.7	1.17866e+06	131395	119975	39240.3	33690.9	22083.9	687289	22627.8	59415.2	41480.1	978741	176264		1.62027e+06	106634	361581	779494
H2AC12	24992.9	19257.1	42735.7	1.17866e+06	131395	119975	39240.3	33690.9	22083.9	687289	22627.8	59415.2	41480.1	978741	176264		1.62027e+06	106634	361581	779494
H2AC14	24992.9	19257.1	42735.7	1.17866e+06	131395	119975	39240.3	33690.9	22083.9	687289	22627.8	59415.2	41480.1	978741	176264		1.62027e+06	106634	361581	779494
H2AC18	24992.9	19257.1	42735.7	1.17866e+06	131395	119975	39240.3	33690.9	22083.9	687289	22627.8	59415.2	41480.1	978741	176264		1.62027e+06	106634	361581	779494
H2AC20	24992.9	19257.1	42735.7	1.17866e+06	131395	119975	39240.3	33690.9	22083.9	687289	22627.8	59415.2	41480.1	978741	176264		1.62027e+06	106634	361581	779494
H2AC21	24992.9	19257.1	30704.2	21364.2	109053	13604.9	39240.3	320627	22083.9	100334	22627.8	59415.2	41480.1	123232	32586.3		32898.5	85976.9	36325.1	56415.5
H2AC4	410113	19257.1	42735.7	1.17866e+06	131395	119975	39240.3	669418	22083.9	115012	22627.8	284060	41480.1	180607	176264	397000	1.62027e+06	327927	1.00784e+06	779494
H2AC6	410113	19257.1	42735.7	1.17866e+06	131395	119975	39240.3	669418	22083.9	115012	22627.8	284060	41480.1	180607	176264	397000	1.62027e+06	327927	1.00784e+06	779494
H2AC7	24992.9	19257.1	42735.7	1.17866e+06	131395	119975	39240.3	33690.9	22083.9	687289	22627.8	59415.2	41480.1	978741	176264		1.62027e+06	106634	361581	779494
H2AJ	24992.9	19257.1	42735.7	1.17866e+06	131395	119975	39240.3	33690.9	22083.9	687289	22627.8	59415.2	41480.1	978741	176264		1.62027e+06	106634	361581	779494
H2AW	410113	19257.1	42735.7	1.17866e+06	131395	119975	39240.3	669418	22083.9	115012	22627.8	284060	41480.1	180607	176264	397000	1.62027e+06	327927	1.00784e+06	779494
H2AX	24992.9	19257.1	30704.2	905434	109053	119975	39240.3	320627	22083.9	100334	22627.8	59415.2	41480.1	123232	176264		1.16041e+06	85976.9	36325.1	56415.5
H2AZ1	24992.9	2.901e+07	30704.2	21364.2	2.53743e+07	119975	39240.3	3.16342e+07	22083.9	3.09692e+07	22627.8	3.63362e+07	41480.1	3.32572e+07	3.23358e+07	32121500	3.12681e+07	85976.9	161013	18377.8
H2AZ2	24992.9	2.901e+07	30704.2	21364.2	2.53743e+07	119975	39240.3	3.16342e+07	22083.9	3.09692e+07	22627.8	3.63362e+07	41480.1	3.32572e+07	3.23358e+07	32121500	3.12681e+07	85976.9	161013	18377.8
H2BC1	8328.85		42906.1	14321.4	57712.8	1908.83		16918.2	6814.1	28926		15661.5	13473	105188	15795.9	2774.62	8749.74	76694.9	24280.4	6612.85
H2BC11	8328.85	82859.7	42906.1	181094	278810	20588.4		85548.2	6814.1	85046.4		34169.4	13473	236365	77933.8	2774.62	8749.74	165750	57777.1	6612.85
H2BC12	8328.85	82859.7	42906.1	181094	278810	20588.4		85548.2	6814.1	85046.4		34169.4	13473	236365	77933.8	2774.62	8749.74	165750	57777.1	6612.85
H2BC13	8328.85	82859.7	42906.1	181094	278810	20588.4		85548.2	6814.1	85046.4		34169.4	13473	236365	77933.8	2774.62	8749.74	165750	57777.1	6612.85
H2BC14	8328.85	82859.7	42906.1	181094	278810	20588.4		85548.2	6814.1	85046.4		34169.4	13473	236365	77933.8	2774.62	8749.74	165750	57777.1	6612.85
H2BC15	8328.85	82859.7	42906.1	181094	278810	20588.4		85548.2	6814.1	85046.4		34169.4	13473	236365	77933.8	2774.62	8749.74	165750	57777.1	6612.85
H2BC17	8328.85	82859.7	42906.1	181094	278810	20588.4		85548.2	6814.1	85046.4		34169.4	13473	236365	77933.8	2774.62	8749.74	165750	57777.1	6612.85
H2BC18	8328.85	82859.7	42906.1	181094	278810	20588.4		85548.2	6814.1	85046.4		34169.4	13473	236365	77933.8	2774.62	8749.74	165750	57777.1	6612.85
H2BC21	8328.85	82859.7	42906.1	181094	278810	20588.4		85548.2	6814.1	85046.4		34169.4	13473	236365	77933.8	2774.62	8749.74	165750	57777.1	6612.85
H2BC3	8328.85	82859.7	42906.1	181094	278810	20588.4		85548.2	6814.1	85046.4		34169.4	13473	236365	77933.8	2774.62	8749.74	165750	57777.1	6612.85
H2BC4	8328.85	82859.7	42906.1	181094	278810	20588.4		85548.2	6814.1	85046.4		34169.4	13473	236365	77933.8	2774.62	8749.74	165750	57777.1	6612.85
H2BC5	8328.85	82859.7	42906.1	181094	278810	20588.4		85548.2	6814.1	85046.4		34169.4	13473	236365	77933.8	2774.62	8749.74	165750	57777.1	6612.85
H2BC9	8328.85	82859.7	42906.1	181094	278810	20588.4		85548.2	6814.1	85046.4		34169.4	13473	236365	77933.8	2774.62	8749.74	165750	57777.1	6612.85
H2BU1	8328.85	82859.7	42906.1	181094	278810	20588.4		85548.2	6814.1	85046.4		34169.4	13473	236365	77933.8	2774.62	8749.74	165750	57777.1	6612.85
H3-3A	6890215	8200715	5.22983e+06	4.65383e+06	514490	9132411	6.81578e+06	4.98138e+06	5.95022e+06	6.94157e+06	6219930	51936	7210326	2.77446e+06	655545	8.63655e+06	7.04217e+06	7.76051e+06	3.76144e+06	5.35037e+06
H4C1	375850	58967.8	412734	92003	2.82185e+06				147195	559508		1.28467e+06	860247	2.20536e+06			426499	755055	544734	1192285
H6PD	25355.1		1.10581e+06			31288250		1550591	121572		416785					330880		4168169
HABP2	1.47538e+07	1.21453e+07	2.667e+07	1.19677e+07	1.99407e+07	2.22678e+07	2.06632e+07	1.62368e+07	1.41666e+07	1.4291e+07	9.81924e+06	9.36095e+06	1.11112e+07	1.22074e+07	1.81613e+07	1.42876e+07	2.04028e+07	1.89765e+07	2.02018e+07	1.77103e+07
HACD3	1660750	113522	1.25128e+06						58012.4							6.46714e+06
HARS1	64313	4.75357e+06	243682	40328230	129684635	306769	281998	275779		62087000	6.3788e+07		5.98772e+07	871450	274862	2.43599e+07	5.97695e+06			176427
HBA1	3.68328e+08	5.02592e+08	4.32745e+08	5.45572e+08	4.68878e+08	3.72361e+08	4.48804e+08	3.98914e+08	4.2799e+08	5.19171e+08	3.72381e+08	4.85283e+08	5.42689e+08	5.88373e+08	5.97487e+08	4.18669e+08	3.56626e+08	5.14583e+08	5.14211e+08	3.38059e+08
HBB	2.24941e+08	3.31188e+08	3.71699e+08	3.15607e+08	2.43362e+08	3.10966e+08	2.92599e+08	3.65908e+08	3.36749e+08	3.20933e+08	2.59233e+08	4.0363e+08	3.10476e+08	2.64841e+08	3.75832e+08	2.76585e+08	5.559e+08	2.68747e+08	3.2459e+08	2.7491e+08
HBD	1.38123e+08	1.63958e+08	1.53629e+08	1.64323e+08	1.40354e+08	1.59137e+08	1.48079e+08	1.97241e+08	1.62451e+08	1.95451e+08	1.63388e+08	2.47458e+08	1.53468e+08	1.5321e+08	1.49739e+08	1.47066e+08	3.62658e+08	1.57165e+08	1.61891e+08	1.39348e+08
HBE1	1.13355e+07	1.08822e+07	1.08933e+07	1.20139e+07	1.22819e+07	9.75466e+06	9.03112e+06	1.14916e+07	1.02807e+07	1.2284e+07	8.84781e+06	1.02555e+07	6.76289e+06	8.95368e+06	7.85963e+06	1.02251e+07	1.00778e+07	1.22365e+07	8.24177e+06	1.02845e+07
HBG1	1.13355e+07	1.08822e+07	1.08933e+07	1.48137e+07	1.24982e+07	1.34194e+07	9.26951e+06	1.16731e+07	1.23875e+07	1.45695e+07	1.123e+07	1.05375e+07	6.76289e+06	8.95368e+06	9.64834e+06	1.08667e+07	1.00778e+07	1.22365e+07	1.17789e+07	1.29838e+07
HBG2	1.13355e+07	1.08822e+07	1.08933e+07	1.48137e+07	1.24982e+07	1.34194e+07	9.26951e+06	1.16731e+07	1.23875e+07	1.45695e+07	1.123e+07	1.05375e+07	6.76289e+06	8.95368e+06	9.64834e+06	1.08667e+07	1.00778e+07	1.22365e+07	1.17789e+07	1.29838e+07
HBZ	1.05632e+07	1.35993e+07	1.55039e+07	1.91571e+07	1.87864e+07	2.11686e+07	2.76284e+07	8.5602e+06	1.22472e+07	2.52735e+07	9.73102e+06	1.14959e+07	9.47045e+06	7.80742e+06	1.6897e+07	1.06098e+07	1.10709e+07	1.36379e+07	1.01335e+07	1.57007e+07
HCLS1	19447950				13603040		29896917
HDGF	5.74953e+06	4.72311e+06	1.86395e+06		7.54274e+06	4281325	4116910	1.38081e+06	1.57473e+06	4933500	3759910	5435960	4.67887e+06	1124600	1.74944e+06	3.32942e+06		1727085	5.92292e+06
HDGFL2	4826760	4561425	1.86395e+06		4.03024e+06	4281325	4116910	1.38081e+06	1.57473e+06	2246150	3759910	5435960	4.67887e+06	1124600	1.74944e+06	3.32942e+06		1727085	5.92292e+06
HDGFL3	6.2611e+06	6.18136e+06	4.99194e+06	4166312	6.17059e+06	6187636	5.5158e+06	4.20636e+06	3.36983e+06	4.14464e+06	6.88016e+06	8.18807e+06	6.2499e+06	2.86527e+06	3.30621e+06	5.63838e+06	1.62708e+06	3.68278e+06	7.51392e+06	2579895
HDHD2	6.42587e+06	5.10902e+06	2.18702e+06	7.3127e+06	2.23156e+06	2.73023e+06	9.21586e+06	1.82453e+06	2.03849e+06	4.8524e+06	3.31171e+06	2.30808e+06	2.27195e+06	1.83047e+06	1.76005e+06	2.86198e+06	2.06151e+06	4.54026e+06	3.05818e+06	2.34466e+06
HDHD5	5.89612e+06	2213590	3.34919e+06	3.39977e+06		3.20019e+06	4.46492e+06	4889376	5.27888e+06	2176236	5930116	2.81179e+06	4.29989e+06		3.95168e+06	3.50051e+06	4.04024e+06	3.30977e+06	1.58161e+06	4.1098e+06
HEBP1	3440940	1847650	2.34932e+06		2348510	1.51184e+06	2.78087e+06		2583730	2.16663e+06	2544815	1.24394e+06	3.46304e+06	1606600	3.8728e+06	3040170	3.41639e+06	4.10167e+06
HECTD4	11438950		1.89711e+07				22086550				8713350		22474650			18374000
HELZ2	2621100	3316660	3227290	3029300		2660160		1733960	1.49882e+06	1548235	2.55505e+06		1491725	3145820	968333	2020270		1532480		2282165
HERC4	34813600		21512450	54938100				5.23363e+07	18700050	20392550	33904250	32179100	43588100	36743550		2.20496e+07				1.44662e+06
HES7	4.58614e+06	9.46499e+06	1.1667e+07	1.10797e+07	9.8846e+06	7.51882e+06	6.6374e+06	9.63687e+06	11052660	1.13417e+07	11290790	7.40804e+06	4.8742e+06	1.07025e+07	10532120	8.78735e+06	6.78282e+06	1.12378e+07	5.46764e+06	1.09783e+07
HEXB	1.32416e+07	2.77141e+07	1.4112e+07	2.23014e+07		6879401	3.35647e+06	1.33943e+07		6.7135e+06	19986600	1.0113e+07	1.09456e+07	2.71243e+06	680577	1.96399e+06	36304102	723560	1.23565e+07	7565940
HGFAC	2.17493e+06	3.20319e+06	2.56088e+06	2.59638e+06	1.55561e+06	2.64023e+06	1.23382e+06	2.19943e+06	2.53667e+06	1.75282e+06	3.09349e+06	1.44808e+06	2.59917e+06	3.29428e+06	3.13378e+06	3.35804e+06	2.37678e+06	1.52153e+06	2.56551e+06	2.82744e+06
HIP1	1.91186e+06		7059770					6912990	6115435				4.44545e+06			7.36262e+06		3982310		7.35573e+06
HK1	5.31152e+06		5276052	5.25136e+06	4.97942e+06		0	2.55812e+06	547150	8483137	793722	1360340	3.17063e+06	5.80229e+06	3.51249e+06		1893398	991534	188022
HK2	4.29015e+06		4466985	4557895	4.05086e+06					5565000			3.17063e+06	5.80229e+06	3.51249e+06
HK3	4.29015e+06		4466985	4557895	1.01691e+07			7483355	508907	5565000			3.17063e+06	5.80229e+06	3.51249e+06
HKDC1	4.25469e+06		4466985	4557895	4.05086e+06	3311209				5565000			3.17063e+06	5.80229e+06	3.51249e+06
HLA-A	1.35479e+06	1.10957e+06	798260	492623	2.4723e+06	2.10033e+06	1.46093e+06	719679	610999	735086	570276	3.10467e+06	2.79091e+06	3.5785e+06	2.26746e+06	423134	2.51978e+06	447628	649941	2.18535e+06
HLA-C	23289.7	110100	12003.2		9968.07		0	34756	24490.6	24772.5	88290.5		18794.9	16644.4	21105.1	26119.9	109690	395406	20412.3	25238.5
HLA-F	79200.8		97640.7										53119.7		54336		91207.7		81910.9	0
HLA-G	161205	102572	179752	150760	48704	59892.7	32521.9	44313.9	67675.3	78753.8	31256.7	26019.7	83158.1	77273.4	64994.7	64018.8	78872.7		137091	30221
HLA-H	57653.4	134576	75540.3	28572.9	58672.1	59892.7	32521.9	79069.9	24490.6	24772.5	31256.7	26019.7	18794.9	16644.4	86099.9	90138.7	106027	395406	76235.1	55459.5
HMBS	4335475	11239600		5408500	3693100	583113		1.03307e+07	7.16753e+06	6.81158e+06		10711400			11768700		928167		9.02836e+06
HMGB1	6980775					5062425	4364410		5300825			15945825	6.57972e+06	1.35735e+07					1.30705e+07
HMGB2	6980775		218744			5062425	411240		5300825			15945825	6.57972e+06	1.35735e+07					1.30705e+07
HMGCS2	1.89963e+07			3425400	1.87537e+07	768590	806865	7942855	1389237	8378155		15696200			10760700	2104310	18064700	1.70387e+07	14785798	3.28248e+06
HMOX1	6.25079e+06	5.22685e+06	6.50248e+06	6023370		242290	2315135	6.58123e+06	2.97129e+06	6.59006e+06		16505520	11037260	2.95699e+06	3.34569e+06	3607532	6.50002e+06	6.55249e+06	8.29743e+06	4820005
HNF4A	1.13918e+06	947460	1778910	756955	1292310	1.63845e+06	1080216	1.07523e+06		435753	1.253e+06	822540	1389180	1549900	1457830	498008	1.08627e+06		536957
HNRNPA0	1415717	3220511	2.76521e+06		1.48617e+06	2.30321e+06	936400			2540650		1468010		2.22031e+06		1.6768e+06	2.0477e+06			1040785
HNRNPC	0		1.0287e+06	2.09205e+07		745020	750847	615521	20280400		647090	18932400	9.89832e+06		940844		911512		674751	856625
HNRNPDL	2.05167e+06	2.83952e+06	2350510	2.95682e+06		1.99371e+06		3.89396e+06	121468	308265	2.09511e+06	2.56139e+06					1582730	3.09519e+06		2.74022e+06
HNRNPH1	0	578964		544292				448702	450038	113543		285292		1.13114e+06	645049				399065	465591
HNRNPK	4.74938e+06	2423530	0		55451.5	3414220		1.53168e+07	13890800			8379310	10188531	9494660	15905000		3.73423e+06	14523100		2627290
HNRNPM	1757430	680585	4.72022e+06	4.78048e+06	5.93218e+06	1.91304e+06	967366	1.45786e+06	2.38494e+06	1.13847e+06	1.56284e+06	1575300	2.05079e+06	354492	1.20597e+06	4.26207e+06	1.95792e+06	1113708	2.16342e+06	1755709
HNRNPUL2	1830335							554649						2.08266e+06		3.24051e+06	4.57155e+07
HP	1.2256e+09	1.2762e+09	1.39784e+09	1.36935e+09	1.05659e+09	1.13046e+09	1.07849e+09	1.37524e+09	1.12491e+09	1.13058e+09	1.35379e+09	1.26619e+09	1.18684e+09	1.19386e+09	1.25679e+09	1.37662e+09	1.39381e+09	1.25561e+09	1.03184e+09	1.09949e+09
HPD	1.36559e+06					3557880						2509940		1741895	2427363
HPR	2.6563e+08	2.39481e+08	2.82955e+08	2.66469e+08	2.61528e+08	2.29805e+08	2.61596e+08	2.50244e+08	2.49035e+08	2.59759e+08	2.34068e+08	2.07989e+08	2.49149e+08	2.70642e+08	3.25216e+08	2.43273e+08	2.75388e+08	2.84828e+08	2.25456e+08	2.34008e+08
HPX	1.21795e+09	1.81694e+09	2.00102e+09	1.85842e+09	1.32365e+09	1.80695e+09	1.74728e+09	1.47673e+09	1.8246e+09	1.7089e+09	1.89861e+09	1.69212e+09	1.88145e+09	1.51133e+09	2.00406e+09	1.58729e+09	1.43063e+09	1.83256e+09	2.11813e+09	1.76607e+09
HRAS	719675		640003	968768					1672680	1.15859e+06					1.16867e+06		655986		1.09835e+06	1.08128e+06
HRG	2.99081e+08	2.08261e+08	5.33808e+08	4.19925e+08	1.96827e+08	2.17311e+08	5.14291e+08	3.13551e+08	4.12494e+08	5.44112e+08	1.90168e+08	1.93203e+08	5.01845e+08	2.26312e+08	5.25436e+08	1.78471e+08	5.24246e+08	5.71993e+08	4.85982e+08	2.16497e+08
HRNR	1.50728e+06	1.17585e+06	565842	1.70709e+06	2.89127e+06	2.34592e+06	1.0946e+06	911620	1.1327e+06	2.1308e+06	1.18612e+06	970801	1.26752e+06	2.14583e+06	1.19838e+06	1472065	898502	3.1483e+06	2.27636e+06	877816
HSD17B10	1790920				0		1959640		44633.9	14054950		1443978
HSD17B11	879963	2593555			1.64853e+06	4109855		2320536	1838928	3449580	2348760	2.54339e+06		2.21801e+06	3.78091e+06		3.53869e+06	5.57511e+06
HSD17B12	3818265	6.42984e+06	7.32647e+06	7.67586e+06	6.89239e+06			10187380		6.2664e+06				9016245	9088810	9.44976e+06	9993580	7709200		8.88275e+06
HSD17B4	388249					333020									2472030			409721
HSP90AB1	1.71469e+06	3.30833e+06	1.04225e+06	791650	2.39885e+06	654353	1.05566e+06	472762	3.56365e+06	2.61993e+06	1.48597e+06	3.22826e+06	4.58005e+06	2.08124e+06	909263	2.02191e+06	4.19937e+06	1.49618e+06	1.31129e+06	560329
HSP90B1	7.14189e+07	1.33321e+08	93035900	153895571	3.21523e+07	104419514	4.13569e+07	98311940	7.00753e+07	1.07253e+08	8.94706e+07	53293936	2257725	1.01379e+08	7.46227e+07	7.61836e+07	114396675	7.48326e+07	5.56628e+07	1.68837e+08
HSP90B2P	28702500	29412000		53944450	26180250	55592500	33313000				55688000	0					26050500	287915		64952000
HSPA1A	3.17673e+06	1.93968e+06	2.09642e+06	4.01774e+06	906946	5.77149e+06	5431664	2.55834e+06	2702539	2.29172e+06	7.82186e+06	4272005	769657	1.98729e+06	4.22224e+06	2.3073e+06	3.71966e+06	1.10939e+06	2.42258e+06	2.85573e+06
HSPA1B	3.17673e+06	1.93968e+06	2.09642e+06	4.01774e+06	906946	5.77149e+06	5431664	2.55834e+06	2702539	2.29172e+06	7.82186e+06	4272005	769657	1.98729e+06	4.22224e+06	2.3073e+06	3.71966e+06	1.10939e+06	2.42258e+06	2.85573e+06
HSPA1L	5.96735e+07	80638000	31302850	103282085	5.64856e+07		86446055	6.34046e+07	4.1128e+07		1.19883e+08	2402120	100345700	667723	3.11019e+07	80819956	1.18415e+08	7.12935e+07	881115	6.50599e+07
HSPA2	1894800		11654.1	44278.2	311397		92338	219140	975140		125924	5097700	3.08548e+06	73010.2		574532		37011.8	154947
HSPA4L	2.1446e+06	1.63471e+06		1828130						2500260						579760
HSPA5	8.47569e+06	9.48148e+07	1.45123e+07	2.27319e+07	5.6921e+07	2.84199e+07	1.18959e+07	8.98016e+06	1.20502e+07	4.07237e+07	1.03224e+07	1.00736e+07	1.09512e+07	9.28848e+06	6.03354e+07	9.60096e+06	1.76578e+07	1.17e+07	1.36636e+07	1.21865e+07
HSPA6	1139298		11654.1	1.24296e+06	1.20362e+06	93534.1	1817755	219140	615309		1.64731e+06	2402120		667723		1.61456e+06	652762	37011.8	1.05235e+06
HSPA7	1139298		11654.1	1.24296e+06	868786		1817755	219140	615309		1.56737e+06	2402120		667723		1413156	652762	37011.8	726168
HSPA8	3.5286e+07	6.7727e+07	4.15358e+07	1.05958e+08	3.32593e+07	2.29053e+07	1.08e+08	5.52273e+07	5.39979e+06	1.42793e+07	9.26482e+07	5.41526e+07	6.80733e+07	5.94677e+07	2.25263e+07	8.43931e+07	8.69346e+06	8.03508e+07	7.28403e+06	69128816
HSPD1	11526127	6312400	6828303	9429882	1.92936e+07	12543045	7592396	17587685	3970225	13284816	9.48291e+06	9074218	14196600	1.15782e+07	9610529	11852500	4715612	216251	8.92153e+06	9541080
HSPG2	4.7656e+07	6.00153e+07	5.33576e+07	4.98543e+07	7.70985e+07	3.79042e+07	6.10479e+07	4.40145e+07	1.35384e+07	3.08825e+07	5.06401e+07	4.78201e+07	1.75572e+07	6.02779e+07	5.30847e+07	4.21499e+07	4.2237e+07	5.9579e+07	3.55246e+07	5.19633e+07
HSPH1	3.1725e+06	2.87849e+06	2816835	1789354	3.22197e+06	3.96454e+06	3.27278e+06	3365450	3896385	3.22866e+06	1690849	0	2.8229e+06	3.58116e+06	3.59808e+06	2131920	2.95183e+06	3.8035e+06	1.86986e+06	4339280
HTRA3	117831
HUWE1	1599080	6.22935e+06	649617	1.07201e+06	1365760	5.95488e+06	1.78805e+07	1621445	1.81079e+06	1850380	936677	1412270	1.72975e+06	1417654	733648	817691	2.25599e+07	5.39548e+06	250007	3.95894e+06
HYOU1	11746400		30920500		168063		14476000	13450765		156616		390826				649303		44855.7	1.60901e+06	97539.1
ICAM2	312235			1358360		172108	172354	2.13497e+06	2193582	5.83287e+06		2404010	60135	452378	3.19299e+06		4353925		2.26047e+06
IDH1	198751			2972232	1106528	340551			1.59628e+06	232736			351964	3265955	1.57896e+06		3410480	69718.6	215246	2.91751e+06
IDH2	353174										208006	206729000	52017.4		421077	397560	2162568
IDH3G	2.23529e+07	309101	2.53174e+07			26912600	40931750		5.26411e+06		3.0035e+07	2.50491e+07	4580500					19319600	17134700	23802700
IDO1	1866054		1913270
IDUA	223318	449456	201518	340573		176555	175546							210338	0	449712				248894
IGBP1	3.26101e+06	3.03035e+06	5.0071e+06	3.34092e+06	1.35296e+06	1732470	2.92411e+06	1.81809e+06	2.51258e+06	4.48314e+06	1.95927e+06	3.53776e+06		2.72843e+06	697838	5.02655e+06	3.52808e+06	6630448	4.59333e+06	3294370
IGF2R	1.71144e+07	3981132	3558343	2.82755e+06	7.1394e+06		1.08472e+07	4801605	9.88187e+06	1.23493e+07	5799839	42141.4		2.1394e+07	8721652		3924365	4.84647e+06	10721930	873414
IGFALS	4.93467e+07	4.12684e+07	4.51039e+07	4.07967e+07	4.29323e+07	4.22537e+07	4.98501e+07	3.85859e+07	4.376e+07	4.0957e+07	9.97944e+07	1.48609e+08	3.80768e+07	4.59977e+07	4.59396e+07	4.47585e+07	5.09407e+07	4.57646e+07	8.28403e+07	4.7665e+07
IGFBP2	1.87268e+07	2.72465e+07	23584225	2.18064e+07	34933550	2.07904e+07	1.70955e+07	22538100	2.68723e+07	23184675	24962100	13657980	2.00969e+07	21180800	3.2941e+07	1.52446e+07	2.89488e+07	2.34452e+07	2.01036e+07	21258060
IGFBP3	1.48365e+06	1.12963e+06	2.4488e+06	1.94778e+06	1.62661e+06	3.29685e+06	1.51747e+06	4.17657e+06	1.64679e+06	1.627e+06	2.92686e+06	4.23908e+06	1.91125e+06	1.72391e+06	2.01727e+06	2.83641e+06	4.34329e+06	2.26199e+06	1.54597e+06	1.93273e+06
IGFBP6	370372		331849	614760		202021			4.68524e+06		507197		420930			149145		712492		10470900
IGFBP7	2.67555e+06	3.36853e+06		9093760			2.85103e+06	5066100		9677550	8516370	6.30143e+06		7970140	5530050	16560980			266314	9065530
IGHA1	1.41342e+09	1.62742e+09	1.66308e+09	1.76192e+09	1.67987e+09	1.75527e+09	1.67634e+09	1.80609e+09	1.89592e+09	2.03342e+09	1.64863e+09	1.86617e+09	1.76356e+09	1.64577e+09	2.15602e+09	1.74645e+09	1.72433e+09	1.65272e+09	1.85319e+09	1.90751e+09
IGHA2	5.86246e+08	6.17432e+08	6.52957e+08	8.84482e+08	6.68827e+08	8.58546e+08	9.23641e+08	7.71875e+08	7.88267e+08	9.6182e+08	9.28645e+08	9.25154e+08	8.90758e+08	8.67575e+08	8.41031e+08	8.95681e+08	6.00318e+08	6.5467e+08	8.46923e+08	9.85295e+08
IGHD	8.01777e+06	7.95057e+06	1.21974e+07	9.0497e+06	1.11746e+07	1.18684e+07	1.0771e+07	8.71425e+06	9.41656e+06	1.01936e+07	1.14018e+07	9.6053e+06	7.50691e+06	9.88818e+06	1.14338e+07	9.58437e+06	1.08525e+07	1.04961e+07	1.0329e+07	8.67591e+06
IGHG1	8.90161e+09	9.18465e+09	8.79313e+09	1.02864e+10	7.73033e+09	8.40709e+09	9.10395e+09	1.06992e+10	8.89985e+09	9.74413e+09	1.03218e+10	6.71458e+09	7.88879e+09	9.51092e+09	8.90158e+09	1.01085e+10	9.8015e+09	8.87847e+09	8.90226e+09	7.67551e+09
IGHG2	5.83062e+09	6.84174e+09	6.11033e+09	7.82182e+09	6.28751e+09	7.5409e+09	6.7104e+09	6.48847e+09	6.92603e+09	5.57638e+09	5.79896e+09	4.30429e+09	6.29958e+09	6.49741e+09	5.86346e+09	5.78825e+09	6.9948e+09	7.33562e+09	6.25296e+09	6.61466e+09
IGHG3	2.49368e+09	2.73594e+09	2.10607e+09	3.01865e+09	1.86008e+09	3.07295e+09	3.268e+09	2.76461e+09	2.22637e+09	1.99566e+09	3.17843e+09	2.38747e+09	2.99353e+09	3.3738e+09	1.84967e+09	3.04306e+09	3.16594e+09	2.23382e+09	2.59075e+09	2.61834e+09
IGHG4	9.96791e+08	9.62014e+08	1.29834e+09	9.03726e+08	1.10937e+09	1.20675e+09	1.00126e+09	9.68001e+08	9.98794e+08	1.19169e+09	9.53197e+08	9.0604e+08	1.01344e+09	1.10366e+09	9.74676e+08	8.60147e+08	9.72006e+08	9.24736e+08	8.83299e+08	1.03847e+09
IGHM	1.34144e+09	1.39169e+09	1.57937e+09	1.50934e+09	1.45942e+09	1.28947e+09	1.36355e+09	1.27007e+09	1.37909e+09	1.47613e+09	1.51045e+09	1.38351e+09	1.40827e+09	1.38812e+09	1.56977e+09	1.3603e+09	1.37729e+09	1.36287e+09	1.17116e+09	1.43012e+09
IGHV1-18	7.33016e+06	8.43453e+06	8.8136e+06	9.1702e+06	8.41208e+06	8.72764e+06	7.53401e+06	6756436	5.17387e+06	1.08745e+07	6.81805e+06	6.52304e+06	5.41767e+06	9.61954e+06	7.21818e+06	7.2381e+06	8.71444e+06	6.56342e+06	8.75305e+06	8.38263e+06
IGHV1-2	5.20431e+06	2.77912e+06	2.79185e+06	4.81089e+06	1.78812e+06	2.8277e+06	3.66886e+06	3319990	5.36473e+06	5.20576e+06	3922310	1.43723e+06	3.356e+06	5.10021e+06	4.81008e+06	3.51897e+06	3.72028e+06	5.01923e+06	4.10822e+06	3.71252e+06
IGHV1-24	2.45959e+06	3.03156e+06	4.81387e+06	4.80173e+06	2.65201e+06	2.49045e+06	1.90753e+06	3.75512e+06	3.14233e+06	3.28147e+06	2.78751e+06	2.25058e+06	3.71544e+06	3.80824e+06	1.52226e+06	3.06941e+06	3.36345e+06	2.70729e+06	3.25054e+06	2.72982e+06
IGHV1-3	3.26865e+06	5.03645e+06	3.485e+06	3.98687e+06	3.34273e+06	3.27129e+06	3.2217e+06	3.78795e+06	3.9048e+06	3.78993e+06	3.69224e+06	2.92807e+06	5.18996e+06	5.09684e+06	4.47203e+06	3.60216e+06	3.6729e+06	3.93609e+06	6.72608e+06	3.37277e+06
IGHV1-46	5.87574e+06	8.08539e+06	7.12567e+06	5.56575e+06	5.07668e+06	5.02658e+06	5.04507e+06	6.16688e+06	6.10286e+06	6.92046e+06	6.16733e+06	4.46577e+06	5.25972e+06	4.73862e+06	3.98235e+06	6.97699e+06	7.08331e+06	6.77142e+06	4.57966e+06	5.51119e+06
IGHV1-69	1.73767e+06	1.50784e+06	2.0408e+06	2.44033e+06	1.67232e+06	1.80891e+06	1.86346e+06	1.62874e+06	1.93945e+06	1.46814e+06	2.06095e+06	1.42576e+06	1.42081e+06	1.4841e+06	1.82717e+06	1.7032e+06	1.99105e+06	1.33419e+06	1.44132e+06	1.77353e+06
IGHV1-69-2	2.26794e+06	774165	1.0661e+06		1567410	2018059	1650770	4.21023e+06	1503577	2489760			2711963	3447930	3078727		2.09632e+06	1.398e+06	438938	1.64576e+06
IGHV1-69D	4.14784e+06	3.63799e+06	4.14704e+06	4.92096e+06	4.27383e+06	3.05262e+06	3.59405e+06	3.74668e+06	4.30342e+06	3.21079e+06	4.88679e+06	2.51755e+06	4.48911e+06	4.71575e+06	4.18959e+06	2.67102e+06	3.85112e+06	2.47612e+06	3.05914e+06	2.03786e+06
IGHV1-8	565293	4.56104e+06	873426	506616	1.83162e+06	1.05715e+06	3.44651e+06	1.04889e+06	792791	738658	1.03307e+06	650307	626682	934035	911964	822254	1.21414e+06	1185088	539095	632369
IGHV2-26	7.35851e+06	6.06178e+06	5.93443e+06	4.54468e+06	6.65179e+06	8.09943e+06	8.37947e+06	5.85495e+06	8.83391e+06	5.55676e+06	7.03536e+06	8.58922e+06	6.43861e+06	8.76227e+06	5.73266e+06	5.52434e+06	7.83411e+06	6.40579e+06	5.31644e+06	8.44456e+06
IGHV2-5	656486	874581	732448	422682	797371	437372	728926	612438	760116	756162	797136	561873	732762	847060	838490	552325	765524	691885	599749	722714
IGHV2-70D	7691885	10696925	9551275	10395795	8958785	9952000	10292280	8.3419e+06	10731575	11275700	10680775	9808185	8359975	10262495	11873575	10198675	8527395	11441375	9045045	11740500
IGHV3-11	8.7894e+06	1.20984e+07	1.25612e+07	1.11143e+07	1.1534e+07	1.05668e+07	9.79176e+06	1.03822e+07	1.10183e+07	1.16278e+07	9.96522e+06	8.97598e+06	9.81143e+06	1.18802e+07	1.10481e+07	1.10064e+07	1.01418e+07	1.26631e+07	1.02801e+07	1.10222e+07
IGHV3-13	8.7894e+06	1.08474e+07	1.11314e+07	1.09098e+07	1.05617e+07	9.43761e+06	8.58165e+06	1.03822e+07	1.10183e+07	1.0898e+07	9.96522e+06	8.97598e+06	9.62449e+06	1.07375e+07	1.10481e+07	1.10064e+07	1.01418e+07	1.11559e+07	9.77714e+06	9.89199e+06
IGHV3-15	4.73403e+07	3.05139e+07	2.80459e+07	2.73678e+07	3.61324e+07	2.55093e+07	3.29077e+07	3.34976e+07	3.33149e+07	2.65223e+07	2.75895e+07	2.51112e+07	2.9196e+07	3.28201e+07	3.48676e+07	3.11038e+07	6.63356e+07	3.56776e+07	3.02777e+07	2.92789e+07
IGHV3-20	8.7894e+06	1.20984e+07	1.25612e+07	1.11143e+07	1.1534e+07	1.05668e+07	9.79176e+06	1.03822e+07	1.10183e+07	1.16278e+07	9.96522e+06	8.97598e+06	9.81143e+06	1.18802e+07	1.10481e+07	1.10064e+07	1.01418e+07	1.26631e+07	1.02801e+07	1.10222e+07
IGHV3-21	8.7894e+06	1.20984e+07	1.25612e+07	1.11143e+07	1.1534e+07	1.05668e+07	9.79176e+06	1.03822e+07	1.10183e+07	1.16278e+07	9.96522e+06	8.97598e+06	9.81143e+06	1.18802e+07	1.10481e+07	1.10064e+07	1.01418e+07	1.26631e+07	1.02801e+07	1.10222e+07
IGHV3-23	1.1862e+07	1.69688e+07	1.50346e+07	1.17539e+07	1.30957e+07	1.32841e+07	1.32811e+07	1.54892e+07	1.25413e+07	1.71689e+07	1.09765e+07	1.27824e+07	1.07199e+07	1.51257e+07	1.8645e+07	1.16699e+07	1.40213e+07	1.30223e+07	1.53548e+07	1.36077e+07
IGHV3-30	1.1288e+07	1.27992e+07	1.35755e+07	1.33408e+07	1.19555e+07	1.15872e+07	1.17595e+07	1.2654e+07	1.32185e+07	1.33862e+07	1.2319e+07	1.00592e+07	1.13819e+07	1.24475e+07	1.30904e+07	1.22393e+07	1.09984e+07	1.30882e+07	1.03313e+07	1.19002e+07
IGHV3-30-3	1.1288e+07	1.27992e+07	1.35755e+07	1.33408e+07	1.19555e+07	1.15872e+07	1.17595e+07	1.2654e+07	1.32185e+07	1.33862e+07	1.2319e+07	1.00592e+07	1.13819e+07	1.24475e+07	1.30904e+07	1.22393e+07	1.09984e+07	1.30882e+07	1.03313e+07	1.19002e+07
IGHV3-30-5	1.1288e+07	1.27992e+07	1.35755e+07	1.33408e+07	1.19555e+07	1.15872e+07	1.17595e+07	1.2654e+07	1.32185e+07	1.33862e+07	1.2319e+07	1.00592e+07	1.13819e+07	1.24475e+07	1.30904e+07	1.22393e+07	1.09984e+07	1.30882e+07	1.03313e+07	1.19002e+07
IGHV3-33	1.1288e+07	1.27992e+07	1.30952e+07	1.28447e+07	1.19555e+07	1.15872e+07	1.16924e+07	1.2654e+07	1.31213e+07	1.30749e+07	1.2319e+07	1.00592e+07	1.13819e+07	1.2373e+07	1.30904e+07	1.19804e+07	1.09984e+07	1.29758e+07	1.03313e+07	1.17492e+07
IGHV3-35	90631.8												248474	248243
IGHV3-38	7.33703e+06	7.38688e+06	7.24164e+06	6.84899e+06	6.70491e+06	6.63782e+06	7.42199e+06	7.6361e+06	6.89735e+06	6.73798e+06	8061763	5.07677e+06	6.59607e+06	7.47598e+06	7.48322e+06	6.79781e+06	6.91842e+06	7.52257e+06	5.99727e+06	6.26312e+06
IGHV3-43	8.7894e+06	1.08474e+07	1.11314e+07	1.09098e+07	1.05617e+07	9.43761e+06	8.58165e+06	1.03822e+07	1.10183e+07	1.0898e+07	9.96522e+06	8.97598e+06	9.62449e+06	1.07375e+07	1.10481e+07	1.10064e+07	1.01418e+07	1.11559e+07	9.77714e+06	9.89199e+06
IGHV3-43D	8.7894e+06	1.08474e+07	1.11314e+07	1.09098e+07	1.05617e+07	9.43761e+06	8.58165e+06	1.03822e+07	1.10183e+07	1.0898e+07	9.96522e+06	8.97598e+06	9.62449e+06	1.07375e+07	1.10481e+07	1.10064e+07	1.01418e+07	1.11559e+07	9.77714e+06	9.89199e+06
IGHV3-48	8.7894e+06	1.20984e+07	1.25612e+07	1.11143e+07	1.1534e+07	1.05668e+07	9.79176e+06	1.03822e+07	1.10183e+07	1.16278e+07	9.96522e+06	8.97598e+06	9.81143e+06	1.18802e+07	1.10481e+07	1.10064e+07	1.01418e+07	1.26631e+07	1.02801e+07	1.10222e+07
IGHV3-49	1.11508e+07	1.62192e+07	1.61628e+07	1.22887e+07	1.2852e+07	1.0242e+07	1.18031e+07	8.79859e+06	1.7412e+07	8.91934e+06	1.14451e+07	1.10059e+07	9.05513e+06	1.30064e+07	1.4396e+07	9.33997e+06	1.35234e+07	1.51604e+07	1.585e+07	1.62609e+07
IGHV3-53	1.01935e+07	1.14709e+07	1.16085e+07	1.14788e+07	1.07908e+07	1.01649e+07	1.04309e+07	1.13182e+07	1.16668e+07	1.17826e+07	1.09765e+07	9.04061e+06	1.01079e+07	1.10578e+07	1.17589e+07	1.06845e+07	9.73659e+06	1.16989e+07	9.0768e+06	1.03714e+07
IGHV3-64	1.62771e+06	2507370	3.63917e+06	1.80154e+06	1731733	2.75998e+06	2766275	2.40861e+06	2.00007e+06	2.0242e+06	1201038	255064	1.77469e+06	1.41732e+06	1.51224e+06	2.70981e+06	1585722	6009648	1.57687e+06	1.46106e+06
IGHV3-64D	8.7748e+06	8823462	9.29122e+06	8.92507e+06	7.1552e+06	7.41975e+06	7.41311e+06	8.40298e+06	9.67738e+06	9.09317e+06	8.81132e+06	7.04247e+06	7718984	9.22758e+06	9.827e+06	8.02637e+06	8.93313e+06	1.02198e+07	7.11774e+06	9.22712e+06
IGHV3-66	1.01935e+07	1.14709e+07	1.16085e+07	1.14788e+07	1.07908e+07	1.01649e+07	1.04309e+07	1.13182e+07	1.16668e+07	1.17826e+07	1.09765e+07	9.04061e+06	1.01079e+07	1.10578e+07	1.17589e+07	1.06845e+07	9.73659e+06	1.16989e+07	9.0768e+06	1.03714e+07
IGHV3-7	4.77115e+07	4.99353e+07	5.61319e+07	5.64245e+07	4.46986e+07	5.3573e+07	5.17366e+07	5.82085e+07	5.66838e+07	6.2675e+07	5.10658e+07	5.0357e+07	4.84963e+07	5.71561e+07	4.81948e+07	5.10536e+07	5.22446e+07	5.85065e+07	5.6438e+07	5.65641e+07
IGHV3-72	3.9384e+07	2.74967e+07	1.9829e+07	1.79512e+07	3.47881e+07	3.05175e+07	4.07092e+07	4.48271e+07	4.24875e+07	2.43751e+07	3.17107e+07	2.35493e+07	3.69707e+07	3.00405e+07	3.49103e+07	2.36411e+07	7.4075e+07	3.34588e+07	3.7372e+07	3.56709e+07
IGHV3-73	1.39863e+07	1.63495e+07	1.69182e+07	1.52951e+07	2.26968e+07	1.58246e+07	2.20232e+07	2.3164e+07	2.15438e+07	1.51213e+07	1.6634e+07	1.56724e+07	2.10465e+07	1.8724e+07	2.36435e+07	2.02223e+07	2.0461e+07	22602100	2.06108e+07	1.84686e+07
IGHV3-74	2.88768e+07	3.45704e+07	3.55945e+07	3.58168e+07	3.37758e+07	3.52455e+07	3.41004e+07	3.30841e+07	3.5832e+07	3.70509e+07	3.4103e+07	4.06658e+07	3.16609e+07	3.65178e+07	3.7219e+07	3.34096e+07	3.36571e+07	3.67933e+07	2.80142e+07	3.57979e+07
IGHV3-9	9.13361e+06	1.26837e+07	1.30194e+07	1.16248e+07	1.18664e+07	1.13231e+07	1.02638e+07	1.09193e+07	1.15919e+07	1.22204e+07	1.05654e+07	9.33079e+06	1.03955e+07	1.23284e+07	1.14971e+07	1.13919e+07	1.04985e+07	1.34812e+07	1.0829e+07	1.14192e+07
IGHV4-28	3.78653e+06	7.02302e+06	4.69475e+06	1.13254e+07	8.49057e+06	5.00746e+06	4.16321e+06	3.65498e+06	1.96417e+07	7.19537e+06	3.31814e+06	7.72174e+06	6.51262e+06	8.55152e+06	8.05579e+06	5.67804e+06	6.88197e+06	1286994	3.92429e+06	7.09032e+06
IGHV4-30-4	3.29276e+06	2.93021e+06	4.37561e+06	3.30908e+06	3.79285e+06	1.86264e+06	3.64149e+06	3.82632e+06	4.00228e+06	4.15983e+06	4.03431e+06	3.44613e+06	4.25711e+06	4.1062e+06	3278250	2.88644e+06	3.29452e+06	4.02064e+06	4.23626e+06	3.84355e+06
IGHV4-34	3.29276e+06	2.93021e+06	4.37561e+06	3.30908e+06	3.79285e+06	1.86264e+06	3.64149e+06	3.82632e+06	4.00228e+06	4.15983e+06	4.03431e+06	3.44613e+06	4.25711e+06	4.1062e+06	3278250	2.88644e+06	3.29452e+06	4.02064e+06	4.23626e+06	3.84355e+06
IGHV4-38-2	3.29276e+06	2.93021e+06	4.37561e+06	3.30908e+06	3.79285e+06	1.86264e+06	3.64149e+06	3.82632e+06	4.00228e+06	4.15983e+06	4.03431e+06	3.44613e+06	4.25711e+06	4.1062e+06	3278250	2.88644e+06	3.29452e+06	4.02064e+06	4.23626e+06	3.84355e+06
IGHV4-39	3.29276e+06	2.93021e+06	4.37561e+06	3.30908e+06	2.78783e+07	4.57365e+06	3.64149e+06	3.82632e+06	4.00228e+06	4.15983e+06	4.03431e+06	3.44613e+06	4.25711e+06	4.1062e+06	39583450	2.19901e+07	3.29452e+06	4.02064e+06	4.23626e+06	3.84355e+06
IGHV4-4	3.79477e+06	5324490	5151270	5.09927e+06	4984225	5135690	1.37495e+07	4.89901e+06	6.00854e+06	5782530	4660810	5014500	4447105	5028450	5653195	3884360	5027470	6530430	4494760	6.58963e+06
IGHV4-59	3.29276e+06	2.93021e+06	4.37561e+06	3.30908e+06	3.79285e+06	1.86264e+06	3.64149e+06	3.82632e+06	4.00228e+06	4.15983e+06	4.03431e+06	3.44613e+06	4.25711e+06	4.1062e+06	3278250	2.88644e+06	3.29452e+06	4.02064e+06	4.23626e+06	3.84355e+06
IGHV4-61	3.29276e+06	2.93021e+06	4.37561e+06	3.30908e+06	3.79285e+06	1.86264e+06	3.64149e+06	3.82632e+06	4.00228e+06	4.15983e+06	4.03431e+06	3.44613e+06	4.25711e+06	4.1062e+06	3278250	2.88644e+06	3.29452e+06	4.02064e+06	4.23626e+06	3.84355e+06
IGHV5-10-1	1.80565e+07	1.84648e+07	1.71036e+07	1.41111e+07	1.17847e+07	1.74797e+07	1.94767e+07	1.44826e+07	1.28883e+07	1.41541e+07	1.10003e+07	1.39782e+07	1.37541e+07	1.45698e+07	1.78744e+07	1.69579e+07	1.37871e+07	2.27779e+07	8.89927e+06	1.49048e+07
IGHV5-51	2.51224e+07	2.58081e+07	2.81939e+07	2.81477e+07	2.45149e+07	2.70016e+07	2.72681e+07	3.24648e+07	3.0584e+07	5.06118e+07	2.63924e+07	2.32987e+07	2.84511e+07	3.16091e+07	2.92437e+07	2.50761e+07	2.599e+07	3.13395e+07	2.53185e+07	2.80577e+07
IGHV6-1	4306866	4512354	5.4855e+06	5053364	5642703	5163204	4205550	6.33754e+06	5.10009e+06	5079912	4.62811e+06	3806460	4.93461e+06	5201154	6109326	4281050	4421418	6.22997e+06	5.31031e+06	6304645
IGHV7-4-1	189666	400950	408706	295770	282750	291440	587083	363620	286450	322276	274332	233480	197641	336716	282634	292304	297166	299524	243886	308926
IGKC	4.00097e+09	3.5105e+09	3.72368e+09	2.90525e+09	3.88458e+09	2.92882e+09	3.53213e+09	3.25837e+09	3.1599e+09	3.81416e+09	3.11943e+09	2.55783e+09	2.73374e+09	3.17404e+09	4.00439e+09	2.77998e+09	3.69279e+09	3.25909e+09	2.34161e+09	3.21367e+09
IGKV1-12	5.52965e+06	5.15204e+06	6.87079e+06	7.79607e+06	5.92552e+06	6.48005e+06	5.49327e+06	7.34832e+06	6.79766e+06	7.07605e+06	5.57162e+06	5.63899e+06	7.76849e+06	6.21209e+06	7.00408e+06	5.80293e+06	7.27492e+06	7.14932e+06	7.60141e+06	7.59188e+06
IGKV1-13	3.90522e+06	1.13674e+07	4.74354e+06	6.18061e+06	3.98096e+06	7916870	1.87846e+06	3.27798e+06	5.38228e+06	8.9827e+06	3.17235e+06	8.40573e+06	3.66429e+06	4.65433e+06	5.32611e+06	6.68957e+06	5.89385e+06	9.56291e+06	3.74726e+06	5.41201e+06
IGKV1-16	2.53791e+06	1.09513e+06	2.90568e+06	3.12772e+06	1.08057e+06	2.93504e+06	2.08229e+06	1.16662e+06	3.3974e+06	1.38002e+06	2.21632e+06	1.98952e+06	1.47192e+06	2.04942e+06	1.30116e+06	1.2483e+06	2.1649e+06	1.79998e+06	2.28905e+06	1.20538e+06
IGKV1-17	2.09926e+06	4.46953e+06	5.91315e+06	2.99664e+06	3.84318e+06	3.1201e+06	1.82292e+06	4.86794e+06	5.07793e+06	2.66998e+06	6.28217e+06	5.51538e+06	3.72004e+06	5.52593e+06	6.83773e+06	4.71662e+06	2.22023e+06	4.56172e+06	5.43168e+06	5.01836e+06
IGKV1-27	3.93556e+06	3.31841e+06	3.36278e+06	3.59866e+06	3.33121e+06	3.3505e+06	3.16507e+06	3.60383e+06	3.44101e+06	3.4755e+06	4.67967e+06	3.89327e+06	4.2278e+06	3.56918e+06	3.33654e+06	3.27885e+06	3.48274e+06	2.98347e+06	3.21509e+06	3.33345e+06
IGKV1-33	1.08469e+07	5.2833e+06	5.75316e+06	5.88623e+06	4.88228e+06	4.9491e+06	4.65605e+06	4.82194e+06	5.25378e+06	1.20326e+07	4.05224e+06	8.46889e+06	5.8354e+06	5.39487e+06	5.14607e+06	4.36636e+06	4.39618e+06	5.14787e+06	8.37671e+06	4.48641e+06
IGKV1-37	14620330	1.23015e+07	1.60252e+07	1.31318e+07	14057000	15814925	1.40928e+07	1.55888e+07	17810370	17611670	14326805	1.03415e+07	1.7072e+07	1.53703e+07	1.31787e+07	1.04779e+07	1.63697e+07	1.47021e+07	1.24758e+07	15263235
IGKV1-39	3.59849e+06	4.64697e+06	5.97181e+06	5.43947e+06	5.46541e+06	4.46015e+06	3.98829e+06	4.95298e+06	5.90926e+06	5.29099e+06	4.69971e+06	4.18821e+06	5.00166e+06	4.3213e+06	5.08641e+06	4.04636e+06	5.16749e+06	5.57866e+06	5.39658e+06	5.03013e+06
IGKV1-5	4.45359e+07	4.78759e+07	5.66587e+07	5.13545e+07	5.01153e+07	4.54906e+07	5.05258e+07	5.8299e+07	4.74422e+07	5.60466e+07	7.20804e+07	4.53202e+07	7.84472e+07	5.21956e+07	6.54041e+07	6.19436e+07	4.89264e+07	4.61998e+07	5.78703e+07	4.88505e+07
IGKV1-6	4.25766e+06	6.22251e+06	7.69506e+06	6.6267e+06	6.72105e+06	5.33434e+06	4.7952e+06	6.84379e+06	5.37565e+06	6.50284e+06	6.01369e+06	5.4106e+06	5.28222e+06	6.40074e+06	6.04211e+06	5.13957e+06	5.99128e+06	6.21959e+06	6.30243e+06	6.76962e+06
IGKV1-8	4.43247e+06	4.58944e+06	3.91587e+06	4.07496e+06	4.02725e+06	4.57791e+06	1.01226e+07	4.90328e+06	4.92226e+06	9.93736e+06	4.03173e+06	4.28025e+06	5.79545e+06	4.36224e+06	3.81423e+06	9.73701e+06	4.12079e+06	4.07406e+06	3.81365e+06	4.9152e+06
IGKV1-9	3.93556e+06	4.13754e+06	3.36278e+06	3.59866e+06	3.35501e+06	4.1413e+06	9.54745e+06	4.43961e+06	4.32422e+06	9.3477e+06	3.49538e+06	3.89327e+06	5.20907e+06	3.56918e+06	3.33654e+06	9.2311e+06	3.48274e+06	3.59018e+06	3.21509e+06	4.30693e+06
IGKV1D-12	5.52965e+06	5.15204e+06	6.87079e+06	7.79607e+06	5.92552e+06	6.48005e+06	5.49327e+06	7.34832e+06	6.79766e+06	7.07605e+06	5.57162e+06	5.63899e+06	7.76849e+06	6.21209e+06	7.00408e+06	5.80293e+06	7.27492e+06	7.14932e+06	7.60141e+06	7.59188e+06
IGKV1D-13	3.90522e+06	1.13674e+07	4.74354e+06	6.18061e+06	3.98096e+06	7916870	1.87846e+06	3.27798e+06	5.38228e+06	8.9827e+06	3.17235e+06	8.40573e+06	3.66429e+06	4.65433e+06	5.32611e+06	6.68957e+06	5.89385e+06	9.56291e+06	3.74726e+06	5.41201e+06
IGKV1D-16	500310	565361	1.08991e+06	816943	885787	1.94976e+06	766992	903683	790320	1.11503e+06	557383	524505	678343	772083	939264	548452	840449	573448	611432	646875
IGKV1D-33	1.08469e+07	5.2833e+06	5.75316e+06	5.88623e+06	4.88228e+06	4.9491e+06	4.65605e+06	4.82194e+06	5.25378e+06	1.20326e+07	4.05224e+06	8.46889e+06	5.8354e+06	5.39487e+06	5.14607e+06	4.36636e+06	4.39618e+06	5.14787e+06	8.37671e+06	4.48641e+06
IGKV1D-37	14620330	1.23015e+07	1.60252e+07	1.31318e+07	14057000	15814925	1.40928e+07	1.55888e+07	17810370	17611670	14326805	1.03415e+07	1.7072e+07	1.53703e+07	1.31787e+07	1.04779e+07	1.63697e+07	1.47021e+07	1.24758e+07	15263235
IGKV1D-39	3.59849e+06	4.64697e+06	5.97181e+06	5.43947e+06	5.46541e+06	4.46015e+06	3.98829e+06	4.95298e+06	5.90926e+06	5.29099e+06	4.69971e+06	4.18821e+06	5.00166e+06	4.3213e+06	5.08641e+06	4.04636e+06	5.16749e+06	5.57866e+06	5.39658e+06	5.03013e+06
IGKV1D-8	899042		983257		569421	809334	475892	702052	819458	557448	642695	530499	789555	822932	815401		1.8224e+06		779445	1.96939e+06
IGKV2-24	1.63477e+07	1.06068e+07	8.4633e+06	1.50099e+07	1.10787e+07	8.79558e+06	7.92372e+06	1.10348e+07	1.28835e+07	1.27336e+07	9.19724e+06	7.67808e+06	1.14836e+07	1.72762e+07	9.3208e+06	8.84819e+06	1.42511e+07	2.49341e+07	1.28664e+07	8.60845e+06
IGKV2-28	1.0055e+07	1.72745e+07	1.15668e+07	1.11928e+07	9.44411e+06	1.17855e+07	1.22788e+07	1.18519e+07	1.16165e+07	1.09768e+07	1.09799e+07	8.79778e+06	1.0676e+07	1.11584e+07	1.16402e+07	1.08285e+07	1.18945e+07	1.03973e+07	1.0658e+07	1.21045e+07
IGKV2-29	1.31168e+07	1.43445e+07	1.50882e+07	1.38579e+07	1.25706e+07	1.36973e+07	1.48277e+07	1.49581e+07	1.5901e+07	1.42737e+07	1.35527e+07	1.24233e+07	1.67209e+07	1.45113e+07	1.55238e+07	1.51324e+07	1.37724e+07	1.67635e+07	1.65151e+07	1.41977e+07
IGKV2-30	7.50019e+06	1.00603e+07	1.06497e+07	9.65501e+06	8.35376e+06	1.00421e+07	4.7522e+07	1.39685e+07	9.97618e+06	1.44182e+07	9.49409e+06	1.1561e+07	1.00726e+07	5.03632e+07	1.15174e+07	9.78022e+06	1.36683e+07	9.09541e+06	1.012e+07	1.77711e+07
IGKV2-40	8.82751e+06	1.59094e+07	1.03743e+07	9.63235e+06	8.28186e+06	1.05458e+07	1.09137e+07	1.07898e+07	1.04621e+07	9.67368e+06	9.78407e+06	7.95534e+06	9.44204e+06	1.00577e+07	1.04724e+07	9.69805e+06	1.04621e+07	9.46132e+06	9.44545e+06	1.13743e+07
IGKV2D-24	1.63477e+07	1.06068e+07	8.4633e+06	1.50099e+07	1.10787e+07	8.79558e+06	7.92372e+06	1.10348e+07	1.28835e+07	1.27336e+07	9.19724e+06	7.67808e+06	1.14836e+07	1.72762e+07	9.3208e+06	8.84819e+06	1.42511e+07	2.49341e+07	1.28664e+07	8.60845e+06
IGKV2D-26	1.10947e+07	1.42797e+07	1.49139e+07	1.37935e+07	1.22403e+07	1.36669e+07	1.48277e+07	1.489e+07	1.41767e+07	1.42027e+07	1.3503e+07	1.16424e+07	1.34572e+07	1.43878e+07	1.47944e+07	1.43543e+07	1.36828e+07	1.3703e+07	1.3885e+07	1.38002e+07
IGKV2D-28	1.0055e+07	1.72745e+07	1.15668e+07	1.11928e+07	9.44411e+06	1.17855e+07	1.22788e+07	1.18519e+07	1.16165e+07	1.09768e+07	1.09799e+07	8.79778e+06	1.0676e+07	1.11584e+07	1.16402e+07	1.08285e+07	1.18945e+07	1.03973e+07	1.0658e+07	1.21045e+07
IGKV2D-29	1.30572e+07	1.42797e+07	1.50233e+07	1.37935e+07	1.25086e+07	1.36669e+07	1.48277e+07	1.489e+07	1.5846e+07	1.42027e+07	1.3503e+07	1.23537e+07	1.61109e+07	1.4432e+07	1.54312e+07	1.51162e+07	1.37111e+07	1.66982e+07	1.64573e+07	1.41344e+07
IGKV2D-30	7.07036e+06	9.97731e+06	1.06497e+07	9.56788e+06	8.35376e+06	9.43784e+06	1.09137e+07	1.07216e+07	9.97618e+06	9.60274e+06	9.49409e+06	7.88567e+06	9.39792e+06	1.00435e+07	1.03799e+07	9.78022e+06	9.34496e+06	9.09541e+06	9.51054e+06	9.64775e+06
IGKV2D-40	8.82751e+06	1.59094e+07	1.03743e+07	9.63235e+06	8.28186e+06	1.05458e+07	1.09137e+07	1.07898e+07	1.04621e+07	9.67368e+06	9.78407e+06	7.95534e+06	9.44204e+06	1.00577e+07	1.04724e+07	9.69805e+06	1.04621e+07	9.46132e+06	9.44545e+06	1.13743e+07
IGKV3-11	4.82923e+07	4.70557e+07	5.77969e+07	4.26208e+07	5.46734e+07	5.05465e+07	3.48339e+07	5.34775e+07	5.01964e+07	5.3831e+07	5.27826e+07	3.95238e+07	4.13517e+07	4.21663e+07	5.31957e+07	4.1547e+07	5.40661e+07	5.81363e+07	5.39117e+07	4.67563e+07
IGKV3-15	3.43142e+07	3.84926e+07	4.07458e+07	3.8284e+07	3.25267e+07	3.75609e+07	2.90937e+07	3.99049e+07	3.80816e+07	4.24206e+07	3.69041e+07	3.52602e+07	3.09686e+07	4.00607e+07	4.38985e+07	4.078e+07	3.86235e+07	3.64962e+07	3.30687e+07	4.14846e+07
IGKV3-20	1.35007e+08	1.25444e+08	1.35673e+08	1.244e+08	1.38151e+08	1.43249e+08	1.27143e+08	1.3535e+08	1.43328e+08	1.60976e+08	1.30962e+08	1.19902e+08	1.1942e+08	1.38638e+08	1.21111e+08	1.38039e+08	1.49801e+08	1.65107e+08	1.31188e+08	1.31936e+08
IGKV3-7	9.29867e+07	1.10849e+08	1.28271e+08	1.1217e+08	1.06398e+08	1.14721e+08	1.0464e+08	9.27791e+07	1.30664e+08	1.35451e+08	1.17879e+08	1.12472e+08	9.48441e+07	1.25505e+08	1.28712e+08	1.19127e+08	1.18438e+08	1.17528e+08	1.0149e+08	1.13693e+08
IGKV3D-11	4.82923e+07	4.70557e+07	5.77969e+07	4.26208e+07	5.46734e+07	5.05465e+07	3.48339e+07	5.34775e+07	5.01964e+07	5.3831e+07	5.27826e+07	3.95238e+07	4.13517e+07	4.21663e+07	5.31957e+07	4.1547e+07	5.40661e+07	5.81363e+07	5.39117e+07	4.67563e+07
IGKV3D-15	1.53428e+07	1.52621e+07	1.55049e+07	2.0531e+07	2.42036e+07	2.33615e+07	1.50121e+07	1.54039e+07	1.72481e+07	2.1613e+07	1.46861e+07	1.55155e+07	1.76159e+07	2.51468e+07	2.00464e+07	1.74793e+07	3.86734e+07	1.82735e+07	1.75702e+07	1.79787e+07
IGKV3D-20	1.0612e+08	9.77791e+07	1.08602e+08	9.13061e+07	1.12861e+08	1.16041e+08	9.96451e+07	1.0716e+08	1.10482e+08	1.14413e+08	1.03589e+08	8.17247e+07	9.12024e+07	1.1155e+08	9.52623e+07	1.03205e+08	1.09798e+08	1.23318e+08	9.85394e+07	9.92845e+07
IGKV3D-7	3.2822e+07	3.64674e+07	3.87878e+07	3.61503e+07	3.05513e+07	3.53182e+07	2.71309e+07	3.75038e+07	3.61529e+07	4.05968e+07	35092728	3.36752e+07	2.93534e+07	3.82746e+07	4.08168e+07	3.82787e+07	3.65282e+07	3.44104e+07	3.1245e+07	3.96838e+07
IGKV4-1	8.05985e+07	7.25631e+07	6.67917e+07	7.054e+07	8.96988e+07	6.3353e+07	7.5444e+07	7.16993e+07	7.17736e+07	6.80779e+07	8.06152e+07	5.79564e+07	7.95964e+07	9.10663e+07	8.06443e+07	7.19113e+07	6.01315e+07	6.49435e+07	6.27309e+07	5.50932e+07
IGKV6-21	1803447	2.13503e+06	1431831	1.85466e+06	1.39458e+06	2.36564e+06		1.28924e+06	486877	1.50104e+06	611004	34575	202707	1.11798e+06	2.0609e+06	675932	2.15296e+06	2.6326e+06	536123	2.33905e+06
IGKV6D-21	570547	567089	704564	713474	709408	770806	598267	732438	722042	628876	586694	517777	771484	746166	613620	592845	678530	726260	678918	606857
IGKV6D-41	570547	567089	634995	713474	709408	717951	598267	706626	695650	583159	536419	483202	725063	736293	583380	544195	678530	684541	678918	573182
IGLC1	1.40581e+08	1.95279e+08	1.70807e+08	1.59672e+08	1.50261e+08	1.74926e+08	1.3431e+08	1.64754e+08	1.61732e+08	2.03636e+08	1.37153e+08	1.9646e+08	2.15695e+08	1.70602e+08	1.73298e+08	1.84359e+08	1.76647e+08	1.87874e+08	1.79798e+08	1.66596e+08
IGLC2	2.49811e+08	3.28624e+08	3.2213e+08	3.22375e+08	2.88334e+08	2.95865e+08	2.40425e+08	3.02217e+08	2.97655e+08	3.41568e+08	2.6907e+08	3.14836e+08	3.40429e+08	3.19776e+08	2.75391e+08	3.01363e+08	3.23853e+08	3.29279e+08	3.25902e+08	2.91432e+08
IGLC3	2.49811e+08	3.28624e+08	3.2213e+08	3.22375e+08	2.88334e+08	2.95865e+08	2.40425e+08	3.02217e+08	2.97655e+08	3.41568e+08	2.6907e+08	3.14836e+08	3.40429e+08	3.19776e+08	2.75391e+08	3.01363e+08	3.23853e+08	3.29279e+08	3.25902e+08	2.91432e+08
IGLC6	2.02632e+08	2.68109e+08	2.497e+08	2.42414e+08	2.2514e+08	2.48243e+08	1.94777e+08	2.4569e+08	2.41515e+08	2.7605e+08	2.14022e+08	2.53888e+08	2.79079e+08	2.50618e+08	2.20067e+08	2.55125e+08	2.46676e+08	2.59762e+08	2.5602e+08	2.37831e+08
IGLC7	2.01303e+08	2.66353e+08	2.47575e+08	2.406e+08	2.23345e+08	2.46936e+08	1.93498e+08	2.43863e+08	2.39676e+08	2.74164e+08	2.12333e+08	2.52299e+08	2.77494e+08	2.49031e+08	2.1816e+08	2.53291e+08	2.44982e+08	2.58063e+08	2.5379e+08	2.3619e+08
IGLL1	4.0311e+08	3.77605e+08	4.64453e+08	4.64022e+08	4.7027e+08	3.69365e+08	4.55567e+08	5.04141e+08	4.28666e+08	3.87887e+08	4.47817e+08	3.47852e+08	4.14562e+08	500766685	4.86176e+08	309446810	4.268e+08	3.88622e+08	5.0505e+08	4.90456e+08
IGLL5	4.59779e+08	5.12293e+08	4.62904e+08	5.21844e+08	3.9571e+08	4.8709e+08	4.09883e+08	4.92201e+08	4.42991e+08	4.47453e+08	4.68613e+08	4.97729e+08	5.65566e+08	5.17522e+08	4.65268e+08	4.76531e+08	4.56598e+08	5.59074e+08	4.83457e+08	5.00675e+08
IGLON5	1559572	4.21838e+06	801273	3.14637e+06	1843795	1.75676e+06		2.81792e+06						2043685	729187	3265834	2.74938e+06			2.18885e+06
IGLV1-36	7.07166e+06	7.5678e+06	6.77211e+06	8.16687e+06	7.45276e+06	9.53193e+06	5.74219e+06	7.97418e+06	8.16916e+06	8.15612e+06	5.5967e+06	6.69759e+06	8.38636e+06	8.30086e+06	3.87079e+06	6.84001e+06	7.42242e+06	8.10632e+06	7.35022e+06	8.15239e+06
IGLV1-40	1.83285e+06	1.34226e+06	1.65739e+06	2.90888e+06	1.80186e+06	1.86957e+06	2.41798e+06	1.05991e+06	2.26516e+06	2.29951e+06	2.45573e+06	1857000	1453694	2.48081e+06	1.7321e+06	1.1392e+06	2.87473e+06	1.18416e+06	1.74432e+06	2.32363e+06
IGLV1-44	1.52404e+06	1.64084e+06	1.09945e+06	1.35358e+06	1.40515e+06	1.54853e+06	1.88193e+06	1560550	1.37348e+06	1.96627e+06	1.50345e+06	1.31132e+06	1340300	1.74124e+06	1.23821e+06	1.33159e+06	2.58522e+06	1.55651e+06	1.19953e+06	1.83792e+06
IGLV1-47	2.62826e+07	2.78866e+07	3.12064e+07	3.03248e+07	2.83217e+07	3.45982e+07	2.66204e+07	3.18749e+07	3.88469e+07	3.53634e+07	3.25719e+07	30484480	2.64844e+07	3.24958e+07	3.45652e+07	2.80574e+07	3.85664e+07	2.92036e+07	3.63304e+07	3.22965e+07
IGLV1-51	6.0935e+06	1.00893e+07	9.37482e+06	1.00087e+07	9.85113e+06	1.03262e+07	8.36085e+06	9.01066e+06	9.20115e+06	8.9796e+06	1.0914e+07	6.11491e+06	1.03428e+07	8.76033e+06	1.15587e+07	9.34413e+06	9.581e+06	8.52602e+06	1.00169e+07	1.0735e+07
IGLV2-11	5.94732e+06	6.92221e+06	9.28629e+06	8.09313e+06	6.06471e+06	8.21503e+06	7.20585e+06	7.42593e+06	7576660	7.58464e+06	7.60514e+06	7.00262e+06	7.77596e+06	7.97968e+06	8.07496e+06	7.65702e+06	8.69722e+06	7.60712e+06	7.76254e+06	7.89066e+06
IGLV2-18	4.88298e+06	3.55271e+06	5.71824e+06	4.76541e+06	5.7284e+06	5.44721e+06	4.67572e+06	6.17189e+06	5.53783e+06	5.95693e+06	4.89133e+06	4.66384e+06	4.5445e+06	3.64638e+06	5.56756e+06	5.02896e+06	6.77798e+06	5.67724e+06	5.32411e+06	6.01671e+06
IGLV2-8	8.04365e+06	1.08102e+07	7.55453e+06	4.36241e+06	5.26014e+06	3.84818e+06	8.05276e+06	4.66432e+06	2.8882e+06	4.04724e+06	8.6038e+06	5.25237e+06	7.54905e+06	8.63206e+06	1.23304e+07	4.2934e+06	6.72689e+06	7176660	7.29517e+06	8617931
IGLV3-10	1.77838e+06	2.54229e+06	3.61135e+06	3.74793e+06	2.67773e+06	811943	5.42268e+06	3.49138e+06	1.97791e+06	2.67276e+06	1.47047e+06	1.09414e+07	2.74277e+06	1.79118e+06	4.10676e+06	5.56521e+06	4.73101e+06	4.26558e+06	4.00246e+06	2.98153e+06
IGLV3-16	9.6954e+06	7.84218e+06	10535715	10555587	1.10633e+07	6.48131e+06	1.05464e+07	1.04359e+07	1.16305e+07	1.08688e+07	1.05534e+07	8.28466e+06	1.0077e+07	7.68162e+06	1.10522e+07	1.16087e+07	1.05205e+07	1.11056e+07	1.07503e+07	1.12281e+07
IGLV3-19	27685000	4105050	224729	1.93817e+07	4.27442e+07	130362	3.22901e+06	2.56276e+07	20957100	3.22378e+07	4191624	3.79694e+07	2.95565e+07	18712950	2.66531e+06	5851730	2.48318e+07	2.26497e+07		27767935
IGLV3-21	1.07313e+07	1.21102e+07	1.22033e+07	1.43019e+07	1.03519e+07	1.04523e+07	1.05312e+07	1.35749e+07	1.40273e+07	1.54231e+07	1.17559e+07	8.16796e+06	1.02745e+07	1.31707e+07	1.67443e+07	1.09873e+07	2.01149e+07	1.14133e+07	1.06142e+07	1.31023e+07
IGLV3-25	8.74052e+06	6.70891e+06	9.57543e+06	9.51935e+06	1.09394e+07	5.66937e+06	1.03138e+07	9.02905e+06	1.05223e+07	1.23299e+07	1.33658e+07	7.83175e+06	8.92596e+06	7.29338e+06	1.02555e+07	9.01891e+06	9.45868e+06	1.00268e+07	1.07326e+07	9.83533e+06
IGLV3-27	8.74052e+06	6.70891e+06	9.57543e+06	9.51935e+06	9.96337e+06	5.66937e+06	1.03138e+07	9.02905e+06	1.05223e+07	1.03572e+07	1.33658e+07	7.83175e+06	8.92596e+06	7.29338e+06	1.02555e+07	9.01891e+06	9.45868e+06	1.00268e+07	1.07326e+07	9.83533e+06
IGLV3-9	8.85833e+06	1.01137e+07	9.79882e+06	1.03943e+07	9.30536e+06	1.02795e+07	9.917e+06	1.27849e+07	1.21331e+07	1.21972e+07	1.04159e+07	6.67348e+06	9.33042e+06	9.91618e+06	1.31301e+07	1.04216e+07	1.10416e+07	1.10638e+07	9.54457e+06	1.0028e+07
IGLV4-69	72954.3	25550.2	126743	92878.4	64912.9	118992	45457.8	103438	121554	125291	77701.6		66101.4	102744	11144.4	102911	86593.6	118608	86347.6	90059.7
IGLV5-45	159210	329330				181588		451426									1.0591e+06		639062	1.54126e+06
IGLV6-57	3.34231e+06	3.57052e+06	4.03444e+06	3.85752e+06	3.82097e+06	3.99551e+06	3.59078e+06	3.66805e+06	4.45323e+06	3.52188e+06	3.48265e+06	3.25803e+06	3.34116e+06	4.01357e+06	3.80248e+06	3.24142e+06	4.41679e+06	4.31415e+06	3.03964e+06	3.89696e+06
IGLV7-43	6.7343e+06	8.07339e+06	7.17711e+06	7.94575e+06	7.33214e+06	8.05236e+06	8.15978e+06	6.48634e+06	8.19348e+06	8.14624e+06	8.50571e+06	7.49495e+06	6.33467e+06	8.11224e+06	8512790	6.57741e+06	7.22649e+06	8.0062e+06	7.12924e+06	8.30299e+06
IGLV7-46	6.7343e+06	8.07339e+06	7.17711e+06	7.94575e+06	7.33214e+06	8.05236e+06	8.15978e+06	6.48634e+06	8.19348e+06	8.14624e+06	8.50571e+06	7.49495e+06	6.33467e+06	8.11224e+06	8512790	6.57741e+06	7.22649e+06	8.0062e+06	7.12924e+06	8.30299e+06
IGLV8-61	6.7216e+06	6.66948e+06	7.75241e+06	6.51345e+06	6.92597e+06	8019480	8.27235e+06	8.7365e+06	6.79248e+06	7.87838e+06	7.09055e+06	7277835	8.69634e+06	9.94536e+06	6574540	6.51889e+06	7.22459e+06	9.79655e+06	7.52949e+06	8.57666e+06
IGLV9-49	2991983	4037032	3863942	4559982	2374692	2655753	2.5021e+06	4111643	3308044	4787074	3735671	3822677	2.35241e+06	4614405	2.26432e+06	4107085	2378993	3317794	3763069	2172130
IGSF8	12853700	20665750								10693182				19866500		0				1.34269e+07
IL1RAP	1.15738e+06	102149	77702.4	93872.9			67456.1	38264.3	128381	101465	113417	89133.9	57306.3	74361	46200.1	42673.9	187303		98756.7	41058.2
IL4I1	1535925
IL6ST	2512686	5.96452e+06	590431	1.07499e+06	2.47788e+06	1.01811e+06	477272	2.82996e+06			508363	459948	3.80512e+06	961646	762528	3.44864e+06	4730060		3.37217e+06	621691
ILF3	271360	2.58378e+06		54494200			44653300			831040			26668750			5349890	6786598
ILK	278514		249453		276289	490130	468720	152200		347726	445548	256079	472264	658146				697727	1.95252e+07
ILVBL	97480	147640	201276	146749	298438	55664.3		221901	208168	174896	121148		168244	91517.7		146470	268130	244174	131689	193635
IMPDH2	87629.5			47680.1			95928.4									88864.7	38212.4	0
INA	5.19828e+06	1.06954e+07	9.67192e+06	6.57739e+06	6.74598e+06	6.34192e+06	7.7859e+06	7.65683e+06	6.49973e+06	8.35889e+06	6947180	2.29409e+06	7227085	4.44221e+06	2.00447e+07	8.21451e+06	1.13586e+07	8.81364e+06	5458165	7648677
INTS4	1.55316e+07	2.874e+07	2.83906e+07	21120300	2.50256e+07	16540860	22120100	17256600	2.46782e+07	31998060	29282523	13691918	2.23744e+07	2.60657e+07	30950100	3.50757e+07	3.04488e+07	22790550	21809025	29176500
IPO11	129671000			131540000								137239000	86812000	100004750				91940550	20817800	134684000
IPO9	133204				194108				130747	248687			171986			105003	127007		171878	232166
IQGAP1	10216370	2.99271e+07	8812545		2.32252e+07	15437357	17486650	1.31243e+07	1.59002e+07	11514622	6136500	6864124	18959469	2.23439e+07	25045515	5799987	2.48497e+06	1.24945e+08	2.53639e+07	2.92663e+07
IRF9	2092570
IRGQ	1.34828e+07	1.02835e+07	13904270	1.17848e+07	16024043	1.57408e+07	6.85413e+06	7.37071e+06	1.72493e+07	1.60731e+07	1.44764e+07	1.22198e+07	9.55866e+06	1.37922e+07	1.37046e+07	1.32007e+07	1.13661e+07	1.1899e+07	1.34458e+07	15986560
ITGA2	1396650	4330344		9799605		6280198	7135210	5465500	8692815		5981685	10339345	4651308		0	2535020	4136850		3751305	3899075
ITGA2B	143919	101419	100712	1.29725e+06	149480	261655	99944.6	166593	84894.9	34573.4	361715	106871		181082	492825	117515	101476	434090	101292	254955
ITGAL	1680865	1906945	1933530		2296020	2370270	1205224	1489935	2088765	1936180	1798010	0	2007815	1023135	2167860	1766095	1690050	1987345	827986	1919375
ITGB1	213400	323529				363026	12112.2	463644					671626		250319
ITGB2	2.1085e+06	5.58685e+06	3.99441e+06	5.43359e+06	4.41106e+06	4.93965e+06	5.74069e+06	2.19059e+06	2.49696e+06	3.11799e+06	4.74382e+06	3.78873e+06	2.1793e+06	6.66752e+06	3.43767e+06	5.41084e+06	3.42147e+06	1.3498e+06	4.70714e+06	5.39055e+06
ITGB4	684067	893752		545162	850067	818184	872596	728266	1.24819e+06	1110430		903423	1.01666e+06	581169	924002	714857	941109		903896
ITGB8	1474060
ITIH1	2.65844e+08	3.08831e+08	3.2072e+08	3.08461e+08	3.07502e+08	2.80061e+08	2.75953e+08	3.28975e+08	3.20422e+08	3.09908e+08	2.92801e+08	2.82145e+08	2.98427e+08	2.88088e+08	3.03863e+08	2.60076e+08	2.82343e+08	3.21822e+08	2.7153e+08	2.96668e+08
ITIH2	6.72375e+08	1.03641e+09	3.73813e+08	6.79085e+08	9.84969e+08	9.18345e+08	6.90872e+08	5.50859e+08	9.2656e+08	1.12374e+09	8.20387e+08	9.80927e+08	8.17485e+08	1.01521e+09	3.68263e+08	9.33422e+08	3.62611e+08	3.90302e+08	3.7423e+08	6.33457e+08
ITIH3	7.76495e+07	1.0068e+08	7.70987e+07	8.663e+07	9.82759e+07	1.75135e+08	9.68639e+07	1.54452e+08	8.21305e+07	1.93717e+08	8.45638e+07	1.3141e+08	8.84343e+07	1.29651e+08	1.47704e+08	1.03456e+08	7.37835e+07	1.10126e+08	1.01344e+08	9.56896e+07
ITIH4	3.05854e+08	3.59622e+08	3.79834e+08	4.15138e+08	3.57678e+08	3.55117e+08	3.38082e+08	4.40878e+08	3.93809e+08	4.42634e+08	4.84706e+08	3.75023e+08	3.19672e+08	4.02105e+08	3.78394e+08	4.89012e+08	6.883e+08	4.03906e+08	3.49492e+08	3.66355e+08
ITM2C	12386740	17082318			12198950	1.64442e+07	1.36613e+07		23289100	2.04145e+07	2.2673e+07							0	23806750
ITPR1	1.79709e+06	1026375				5.93695e+06	1.73686e+06	0				2.15159e+06	1233997	1221188	391773		93049	1.30864e+06		1459045
ITPR2	45404.3		0			901442	27062.2			2941545						5.30495e+06	1015725
ITPR3	9.99842e+06	16368100	1.55407e+06		9585150	16686900	9.48819e+06	11651860		12840290	1.77505e+07	7.59882e+06	18889500	11557000	8691200	13758400	18026000		5327800	8.22621e+06
JCHAIN	5.70284e+07	5.44519e+07	4.76934e+07	5.68514e+07	5.47479e+07	5.54319e+07	4.47392e+07	6.79103e+07	6.61475e+07	6.37665e+07	5.9818e+07	3.85508e+07	6.5115e+07	8.02773e+07	5.32649e+07	5.22824e+07	5.95093e+07	7.79037e+07	6.58473e+07	5.25228e+07
JUP	6.69802e+06		9.91216e+06	2.19256e+06	16524.5		6.3853e+06	478184	4593610	8.47533e+06	8.29684e+06	7.09707e+06		3980430	4.37777e+06	7.57958e+06	5.93383e+06	8.52811e+06	12298725	4402700
KARS1	4.15157e+06				1.01458e+07				5.60025e+06	8.31162e+06	190398	595667	6592255					9.22711e+06	843755	1.31199e+07
KBTBD11	684420	279884					2801220	1314980
KCTD12	24000015	25192055	4313485			12973760	3.57783e+06	16217341		1220715	2.55339e+07	2.25965e+07	3.79926e+06	1.59187e+07			3.93259e+06	8.5269e+06	2.14724e+06	4.0547e+06
KDSR	43959.3
KHDRBS1	116981	284350						320410								314852			348348
KHSRP	8.75714e+07	1.37747e+06	1.43216e+06	1.87473e+09	1.19564e+06	1.26254e+06	970247	1.00946e+06	1.19511e+06	1.20774e+06	1.08162e+06	780196	1.00295e+06	885751	1.5201e+06	992911	127820	3.0191e+06	1.40642e+06	872300
KIAA1191	316012	719891		598670				656723		530671				825987			585044		602740	218086
KIAA1217	11201000		5180650					9983150				10073200		1341145
KIAA1549	2186920	2.90227e+06	1.97324e+06	3255580		4551040	1.60585e+06				3212930	2.03079e+06	4698860		1757830	2473425			3637065	2240930
KIF5B	5.3794e+06	6932770	6.357e+06		5.50648e+06		8.26715e+06	974275	3.75799e+06	1.13938e+07	6053270	2344748	6150200	3.95878e+06		5.48509e+06	5.20377e+06	8183265	9.74312e+06
KIF5C	46790.3									2.97563e+06
KIT	26256000	60328800	63808000	63781700	30274200	45871350	46057200	30083250	0	70902200	3.78175e+07	55736200	64555025	54379500			63483100	51635850	45007800	45931800
KLHL22	188302	107564	666464			0	168884	636035	55587	730076				385605			377053			217260
KLK1	1016955	2.6663e+06			0	1.24633e+06	2.12927e+06	1.07461e+06		1480480	1622544	1455285	2932179	1.66329e+06	1927995	2633693	2.56688e+06	3836450	1.52014e+06	1600808
KLK10	5.23777e+06				4.83667e+06			2.16545e+06		4092108						4.91955e+06	5.31046e+06	1303450
KLKB1	6.54469e+07	2.6216e+08	1.28457e+08	1.86311e+08	1.84815e+08	1.4232e+08	2.73741e+08	1.3132e+08	2.28128e+08	7.61074e+07	2.65229e+08	2.80066e+08	1.08125e+08	1.49832e+08	1.29888e+08	2.51967e+08	8.68983e+07	2.00431e+08	8.57377e+07	1.40683e+08
KNG1	1.66507e+08	1.88298e+08	2.15444e+08	2.27397e+08	1.99558e+08	2.28671e+08	1.88801e+08	2.16611e+08	2.0955e+08	2.32013e+08	1.67301e+08	1.71027e+08	1.94508e+08	2.00516e+08	2.00925e+08	1.96734e+08	1.87155e+08	2.08988e+08	2.18276e+08	2.04277e+08
KPNA1	490682	1.54204e+07	9.76456e+06	12657400		387338		1.45661e+07				1.06602e+07	203045	9.42524e+06		8.27004e+06	1.0716e+07		1013220
KPNA5	94335.8	1.54204e+07	9.76456e+06	12657400		387338		1.45661e+07				1.00095e+07	203045	9.42524e+06		8.27004e+06	1.0716e+07		1013220
KPNA6	94335.8	1.54204e+07	9.76456e+06	12657400		446516		1.45661e+07				1.00095e+07	203045	9.42524e+06		8.27004e+06	1.0716e+07		1013220
KPNB1	540597		4.47403e+06		104442	1029650	4420105	409168	0	712836	384940		634432		4755235	551363				1428520
KRAS	719675		640003	968768					1672680	1.15859e+06					1.16867e+06		655986		1.09835e+06	1.08128e+06
KRT1	4.28587e+07	1.94097e+08	1.27625e+08	2.1665e+08	2.10853e+08	1.99966e+08	1.80498e+08	1.46554e+08	8.40139e+07	1.9046e+08	1.87171e+08	1.18828e+08	1.72796e+08	1.72487e+08	1.45387e+08	1.51992e+08	1.07607e+08	1.46674e+08	1.77961e+08	9.71201e+07
KRT10	8.90614e+07	2.37379e+08	1.22038e+08	2.42313e+08	2.76187e+08	1.74694e+08	4.07119e+07	1.99732e+08	1.58713e+08	2.02571e+08	9.46881e+07	1.12577e+08	8.74298e+07	1.83082e+08	9.23249e+07	9.7911e+07	1.41655e+08	1.18693e+08	5.93768e+07	9.50917e+07
KRT12	56965.8		543128			51005.4	31061.4	0	267330		30621.8					72324.7		53810.5	52608.3	19954.4
KRT13	749307	2.01511e+06	3.2082e+06	2.33134e+06	172971	1.96774e+07	1.66487e+06	1.92627e+06	1.15954e+07	2.14656e+06	155332	14909	41403.3	1.68904e+06	203039	939685	8.17761e+06	214648	84013.1	1.63839e+06
KRT14	9.34519e+07	6.23096e+08	4.42871e+08	6.0848e+08	7.14057e+08	1.12117e+08	3.74388e+08	2.05177e+08	5.67194e+08	4.24193e+08	3.67248e+08	9.45975e+07	6.87373e+08	9.31605e+07	3.64907e+08	2.76563e+08	2.69342e+08	3.55329e+08	3.61191e+08	4.38851e+08
KRT15	6.55607e+06	6.72562e+06	1.19079e+07	9.93037e+06	6.72932e+06	7.53697e+06	5.80636e+06	6.81917e+06	6.86698e+06	1.0376e+07	7.26505e+06	6.19423e+06	5.51045e+06	1.32858e+07	5.7348e+06	7.18657e+06	6.76115e+06	6.48588e+06	6.29113e+06	7.53558e+06
KRT16	1.09945e+08	2.79778e+08	2.11704e+08	3.46253e+08	2.75098e+08	2.24962e+08	2.03492e+08	2.39978e+08	3.7306e+08	2.47144e+08	2.80899e+08	3.32375e+08	3.74514e+08	2.74878e+08	2.36175e+08	2.51605e+08	2.74396e+08	3.0813e+08	1.58515e+08	2.99662e+08
KRT17	2.4841e+07	2.75466e+08	4.24705e+08	2.4935e+08	3.58328e+08	2.83307e+07	2.7362e+07	2.34077e+07	4.09115e+08	5.70605e+07	2.42852e+08	2.09479e+07	3.46448e+08	3.00776e+07	1.3092e+07	2.62149e+07	2.83856e+07	2.42033e+08	2.60603e+08	3.11995e+08
KRT18	1.19168e+07	1.60972e+07	1.44865e+07	3.19529e+06	1.60059e+07	1.36187e+07	1.70116e+07	1.90658e+07	3.65583e+06	1.98823e+07	1.30997e+07	1.26453e+07	1.488e+07	7.94264e+06	3.15795e+06	1.51342e+07	1.44054e+07	1.97652e+07	1.15591e+06	1.67212e+07
KRT19	328578	4.0566e+06	6.64016e+06	6.84701e+06	28966.6	239297	61625.3	0	1.08344e+07	2.37693e+06	4.01534e+06	162276	5.63223e+06	3.67546e+06	7.363e+06	108665	207845	93334.8	1.21664e+06	63532.2
KRT2	1.60959e+07	1.19697e+07	3.00379e+07	2.99685e+07	1.57465e+07	1.75425e+07	2.04182e+07	2.02953e+07	2.09736e+07	1.71689e+07	3.22731e+07	2.06392e+07	2.11335e+07	2.07809e+07	1.31209e+07	1.4218e+07	1.15825e+07	7.50583e+06	3.77054e+07	1.49261e+07
KRT20	2.33168e+07	2.187e+07	2.30395e+07	5.65999e+07	2.74141e+07	2.78716e+07	2.70482e+07	2.33176e+07	4.78769e+07	5.12747e+07	5.69001e+07	2.0531e+07	5.26661e+07	2.41536e+07	1.23456e+07	2.44319e+07	2.82604e+07	2.54473e+07	2.71724e+07	1.87335e+07
KRT24	61425.1	29521.1	42854	33288.6	28966.6	22746.8	30563.9		30710.3	43574.4		14909	41403.3	36923.3		36340.2	26884.6	39524.4		43577.8
KRT25	86302.9	180592	144613	201624	155953	120797	20574.9	117075	237294	205131	244427	131987	119438	100491	149710	89622.4	178045	236097	111644	101874
KRT26	45972.8	87278.3	68777.9	55259.7	94998.8	38508	20574.9	49093.3	59048.1	108933	83092.1		28423	100491	27791.4	34697	54675.4	109682	29098.7	49027.1
KRT27	86302.9	180592	144613	201624	155953	120797	20574.9	117075	237294	205131	244427	131987	119438	100491	149710	89622.4	178045	236097	111644	101874
KRT28	5.57722e+07	2.04252e+08	8.59933e+07	1.51539e+08	1.3971e+08	1.09632e+08	1.80899e+06	1.33775e+08	1.11316e+08	1.45708e+08	2.00537e+06	8.71689e+07	3.81469e+07	1.3983e+08	5.61135e+07	6.52554e+07	3.98795e+07	5.80514e+07	7.00063e+06	3.74551e+07
KRT3	515212	174816			19232.1	129696	1.98127e+06	557424		482945	441166			262441	673216	42803.2		23243.8
KRT31	1.08868e+06	29521.1	230648	33288.6	554887	22746.8	88096.4		30710.3	43574.4		14909	41403.3	36923.3		36340.2	228939	39524.4	180182	82072.4
KRT32	61425.1	29521.1	230648	33288.6	54420.6	22746.8	88096.4		30710.3	43574.4		14909	41403.3	36923.3		36340.2	228939	39524.4	180182	82072.4
KRT33A	1.02726e+06		187794		525921		57532.5										202054		180182	38494.7
KRT33B	1.08868e+06	29521.1	230648	33288.6	554887	22746.8	88096.4		30710.3	43574.4		14909	41403.3	36923.3		36340.2	228939	39524.4	180182	82072.4
KRT35	61425.1	29521.1	42854	33288.6	28966.6	22746.8	30563.9		30710.3	43574.4		14909	41403.3	36923.3		36340.2	26884.6	39524.4		43577.8
KRT36	61425.1	29521.1	42854	33288.6	54420.6	22746.8	88096.4		30710.3	43574.4		14909	41403.3	36923.3		36340.2	71453.4	39524.4	37337.1	82072.4
KRT37	61425.1	29521.1	230648	33288.6	28966.6	22746.8	30563.9		30710.3	43574.4		14909	41403.3	36923.3		36340.2	184370	39524.4	142845	43577.8
KRT38	61425.1	29521.1	42854	33288.6	54420.6	22746.8	88096.4		30710.3	43574.4		14909	41403.3	36923.3		36340.2	71453.4	39524.4	37337.1	82072.4
KRT4	3.00367e+06	32971.7	32794.3	23803	26705.8	44924.5	2.39746e+06	25499.5	4.12693e+07	31932.3	2.44287e+07	2.42467e+07	1.53505e+06	4.2055e+07	2.49776e+06	4.76083e+07	1.86371e+07	25579.3	5.23936e+07	32512.4
KRT5	1.62736e+07	4.76947e+07	1.6967e+07	2.96799e+07	1.98087e+07	1.89459e+07	1.84189e+07	3.30193e+07	3.98268e+07	2.11733e+07	2.9043e+07	1.52775e+07	2.61514e+07	3.54034e+07	2.2147e+07	2.27571e+07	8.23212e+07	3.26775e+07	2.8009e+07	2.98363e+07
KRT6A	5.44026e+07	9.13874e+07	8.16473e+07	8.50965e+07	7.93299e+07	7.65484e+07	7.1458e+07	9.67113e+07	6.57423e+07	7.9435e+07	8.21543e+07	8.75548e+07	8.00374e+07	1.08696e+08	9.35354e+07	7.3378e+07	7.91284e+07	7.59798e+07	6.78341e+07	8.57903e+07
KRT6B	2.13786e+07	4.54668e+07	2.39913e+07	3.51225e+07	2.51395e+07	3.01868e+07	2.77326e+07	4.06056e+07	2.49192e+07	2.61633e+07	3.00941e+07	2.62421e+07	2.82974e+07	4.40752e+07	3.95203e+07	2.35003e+07	3.2963e+07	3.59557e+07	2.13089e+07	3.6947e+07
KRT6C	2.12644e+07	4.52369e+07	2.37991e+07	3.48702e+07	2.49414e+07	2.99985e+07	2.74688e+07	4.03028e+07	2.48417e+07	2.59716e+07	2.98984e+07	2.60457e+07	2.80054e+07	4.37877e+07	3.9305e+07	2.33295e+07	3.26399e+07	3.57598e+07	2.11421e+07	3.66493e+07
KRT7	300474	135095	484688	383257	1.21979e+06	1.13597e+06	322942	360243	830543	1.25305e+06	488171	353695	554570	372502	449172	432610	421219	151888	884240	530627
KRT71	0	37744.6		923776	29235.8	48670.4	66926.6	65322.6		50371.1	2.35818e+06			51565.1	44979.4	40380.9	40274.9		42105.2
KRT72	0	37744.6	3.04739e+06	923776	29235.8	48670.4	66926.6	65322.6	58812.8	50371.1	2.35818e+06		972615	51565.1	44979.4	746825	40274.9		66057.9	1.0912e+06
KRT73	0	37744.6		1.32661e+06	29235.8	59057.1	66926.6	478790	495337	507806	2.35818e+06	417378		51565.1	44979.4	40380.9	4.37231e+06		325425	0
KRT74	0	37744.6		923776	29235.8	48670.4	66926.6	65322.6		50371.1	2.35818e+06			51565.1	44979.4	40380.9	40274.9		42105.2
KRT75	61606.3	378655	3.04468e+06	71353.4	268019	211105	66168.7	595106	37020.1	48819.9	244905	31304.3	1.01495e+06	148016	43484.6	42379.4	68703.2	312665	19340.1	1.13195e+06
KRT76	543452	207787	32794.3	23803	45937.9	164234	2.01184e+06	582924	39761.9	514877	474320	15399	34991.8	293086	703549	75349.4	46313.6	48823.1	28369.6	32512.4
KRT77	1.02746e+06	1.23952e+06	545516	5.19645e+06	8.0744e+07	8.32911e+07	4.04568e+07	8.47254e+06	1.01456e+07	9.10655e+07	3.98066e+07	3.86532e+07	9.05416e+07	8.85016e+07	8.72348e+07	7.69714e+07	784540	845658	479337	8.11804e+07
KRT79	549506	1.64332e+07	31820.7	6.8499e+06	43370.1	1.03544e+07	1.00025e+07	1.52624e+07	37020.1	531765	1.03918e+07	7.18148e+06	2.96307e+06	1.5731e+07	8.27652e+06	7.15872e+06	1.42309e+07	1.26277e+07	19340.1	1.31868e+07
KRT8	1.41853e+07	4.83471e+06	1.85686e+07	2.43872e+06	3.49648e+06	4.01445e+06	1.96524e+07	3.86372e+06	1.32062e+07	4.77129e+06	2.62308e+06	1.69011e+06	5.97924e+06	2.9521e+06	22870490	2743389	1.35817e+07	4.61245e+06	2.52379e+06	2.3656e+06
KRT80	1.83211e+06	701603	7686910	1.39468e+06	495128	0	1854704	1.18046e+06	1758080	1950998	1178637	399990	1.52801e+06	761478	0	1.61603e+06	1111590		1.77733e+06	1506070
KRT81	1.80494e+06	1.44692e+06	2.81261e+06	1.99982e+06	2.03161e+06	2.00964e+06	1.60828e+06	2.19246e+06	1.46213e+06	2.46254e+06	1.55168e+06	2.73417e+06	1656415	1.87763e+06	1.70804e+06	2.26165e+06	2.09108e+06	1663670	2.5118e+06	1.9545e+06
KRT83	1.80494e+06	1.44692e+06	2.81261e+06	1.99982e+06	2.03161e+06	2.00964e+06	1.60828e+06	2.19246e+06	1.46213e+06	2.46254e+06	1.55168e+06	2.73417e+06	1656415	1.87763e+06	1.70804e+06	2.26165e+06	2.09108e+06	1663670	2.5118e+06	1.9545e+06
KRT85	1.93191e+06	1.44692e+06	3.42639e+06	2.29167e+06	2.41671e+06	2.44446e+06	2.10167e+06	2.5607e+06	1.46213e+06	2.46254e+06	1.55168e+06	2.73417e+06	1.88867e+06	2.12729e+06	2.2567e+06	2.26165e+06	2.43659e+06	2.24882e+06	2.99046e+06	2.53967e+06
KRT86	1.80494e+06	1.44692e+06	2.81261e+06	1.99982e+06	2.03161e+06	2.00964e+06	1.60828e+06	2.19246e+06	1.46213e+06	2.46254e+06	1.55168e+06	2.73417e+06	1656415	1.87763e+06	1.70804e+06	2.26165e+06	2.09108e+06	1663670	2.5118e+06	1.9545e+06
KRT9	5.15486e+07	8.63565e+07	5.81734e+07	1.13353e+08	5.30679e+07	5.6979e+07	5.0994e+07	4.39746e+07	5.60792e+07	5.00124e+07	5.88815e+07	4.50237e+07	4.2487e+07	5.23645e+07	4.06282e+07	4.88039e+07	4.41292e+07	4.9314e+07	5.34237e+07	5.95872e+07
L2HGDH	14431828	11595050		14979900	16086600	18264300	14842150		18346050	13675180	0	22441630	12214125		8847875	13792750	17802300	4447775	1.34695e+07	1.3814e+07
L3HYPDH	1.01909e+07						15371400			253429								7159500
LAMA2	1.20859e+06		1687460		3.66154e+06				1313750			256606		999475		592380		832052	1.11195e+06	1283100
LAMA5	124655550	1.70114e+06	1.65927e+06		1.14113e+06		33110400		2.23364e+06		1789648	2.01077e+06	5.05546e+07	2.04308e+06	1.59684e+06	3796540		2269645	7.84389e+07	4418181
LAMB2	11841050	657892	9565360	5.34089e+06	1421732		4567826	2.41104e+07	1.09683e+07	1.22988e+07	1.30008e+07	836578	2.97632e+06	1641895	1.76959e+07		1.54575e+07	1.27541e+06	751198	3.49399e+06
LAMC1	2.27404e+08	3084590	3.46069e+08	0	166730770	178812391	2.44344e+08	308096500	204307225	2.46451e+08	9895660	1.53517e+08	7.29188e+06	1.25843e+06	1.7209e+08	1.63064e+08	256879500	1.25924e+07	1.10523e+08	3.23573e+08
LAMP1	293336	2556171	1853065	1696667	1886970					1927000		1.92688e+06		2096739						1.15617e+06
LAMP2	129719		121897	170148			83691		122799				125832				131578	161431
LAP3	2273820	398189	55860542	110466	80089.8		187880	1482955		78564200	72580100	291555	35878800	1.72049e+07	0		439847		405298	37934300
LARP1	314108	26895125							25833750
LARS1	1.10455e+06	4245310	5709214	7.39458e+06	1.19343e+06	749459		4540770	1.45802e+06	1.47119e+06	7110310		8.19837e+06	1.26102e+06		4.84216e+06	2.02788e+06	1.05959e+06		1.42101e+06
LBP	2.83861e+07	4.99623e+07	4.99632e+07	5.47634e+07	5.24005e+07	1.80718e+07	4.76906e+07	4.93017e+07	2.21575e+07	5.75214e+07	6.29582e+07	4.94726e+07	4.43063e+07	5.94749e+07	6.35575e+07	2.17269e+07	4.53159e+07	4.37367e+07	4.95003e+07	4.86647e+07
LBR	440483																	468484
LCAT	4.55668e+06	6.72787e+06	5.35004e+06	6.20064e+06	5.11635e+06	6.2768e+06	4.76745e+06	4.74338e+06	4.43034e+06	6.07686e+06	7.68238e+06	4.54273e+06	7.37876e+06	7.91472e+06	7.04278e+06	6.84492e+06	5.19794e+06	8.98444e+06	7.59276e+06	4.81089e+06
LCN2	1.34188e+06	7.80066e+06	9.89799e+06	3907157	672460	6.73655e+06	4.51895e+06	1.00415e+07	273489	3014170		6018705	940900	4.48602e+06	2.60531e+06		1518600		4253420	6.66183e+06
LCP1	6.90701e+07	7.38156e+07	8.40498e+07	1.03884e+08	6.42885e+07	1.11985e+08	1.04262e+08	7.26018e+07	1.05906e+08	7.65393e+07	1.96609e+09	1.15622e+08	1.05067e+08	1.21887e+08	9.66828e+07	8.81941e+07	1.12362e+08	9.40434e+07	9.88449e+07	1.26986e+08
LDHA	2.38476e+06	4124490	6.13617e+06	64375.8	8.11432e+06	790094	8.23903e+06	5.84366e+06	6.38764e+06	3.20351e+06	4114990	6748568	1.53999e+07	13108680	1959600	3.16344e+06	1.20989e+07	8.22572e+06	5072230
LDHB	12071484	703224	9.83727e+06	1.46308e+07	2.86086e+07	7.02569e+06	6.78638e+07	1.16414e+07	1.3424e+08	3.10057e+07	2.39932e+07	2.46709e+07	1.78804e+08	1.23782e+07	1.79834e+07	2.50292e+07	1.7234e+07	4.60998e+07	1.25383e+07	7.4508e+07
LEMD2	764983			973248	643022	565861		687882		477148		908496					765118		968065	2648765
LGALS2	1365335	2838800	1437415				2227185							1425870					1051175
LGALS3BP	2.45198e+08	4.74384e+08	4.57793e+08	4.23691e+08	3.01954e+08	3.68789e+08	3.462e+08	3.26972e+08	3.54751e+08	4.71548e+08	3.73111e+08	3.24976e+08	3.95019e+08	4.43171e+08	3.75996e+08	3.01769e+08	3.67355e+08	3.97724e+08	4.13715e+08	4.53791e+08
LGALSL	759160		6290890	4.69445e+06		949093		2980615			3040990					0	0			1522350
LIMCH1	10315652	5029966	7.75658e+06	16539685		8765675		15115465	14177690			10881950		10120715	19915170			0	8611800	7096200
LIMS1	748995									110074			156302
LIPA	10810650	665330				5486650	12999550		22311895			19120700		176702
LLGL1	601388		173532	182653		698098											241503			1167031
LMAN2	3.80026e+06		2.82759e+06	3904430		1.76172e+06	1573320	3407270	3.99853e+06	2026430	2802015	5235775	2423160	4230880	1317360				2736710	3584130
LMNA	172801	1.67889e+07	1.7187e+06		7.79005e+06	151706		1.33914e+06	287259		349662	198287	4281550	702252	1.85255e+06	3158840	161600		538677
LMNB1	372070	1149100		519894		357381			1.17489e+06	336419	534094	175876		409947		829474	1147032	930394
LOC102724334	8328.85	82859.7	42906.1	181094	278810	20588.4		85548.2	6814.1	85046.4		34169.4	13473	236365	77933.8	2774.62	8749.74	165750	57777.1	6612.85
LONP1	12059046	5.6946e+06	65255.8	17502530	1.94146e+07	2.23511e+07	8.85021e+06	9.46777e+06	4.30098e+06	1.55805e+07	9.39866e+06	4.58323e+06	1.00368e+07	2.02508e+07	1.12834e+06	8.33659e+06		1.85702e+07	8.33475e+06	1.37722e+07
LOXL4	646484						5045995		4.97444e+06	762684	1.08101e+06				6700655	1184330	4.3112e+06	594985
LPA	3.63365e+07	5.29301e+07	3.52769e+07	4.06183e+07	4.61013e+07	2.65796e+07	3.69181e+07	3.71983e+07	2.51515e+07	2.98731e+07	3.34905e+07	3.39539e+07	6.35514e+07	3.35748e+07	4.1627e+07	6.52473e+07	2.74214e+07	2.89883e+07	4.82898e+07	2.55837e+07
LPCAT1	5.80109e+06						10697500		1.50866e+07						1.68278e+07
LPCAT4	5744920					5.23837e+06					3118400								8324635
LRBA	14870050	2.52778e+07	4.17501e+06	30129800	25709950	1.42983e+06	26199930	38740199	1.99541e+07		17696322	4.07208e+06	2.94677e+07	2.22813e+07	26312400	17323625	2.91052e+07	3.50077e+07	33090460	0
LRCH1	52030750	118449000		112436500	7.72808e+07	113694000					116573750	57229250	72093500						53805000	128596000
LRCH2	52030750	118449000		112436500	7.72808e+07	113694000					116573750	57229250	72093500						53805000	128596000
LRG1	1.00266e+08	1.64805e+08	1.94089e+08	9.77228e+07	5.38916e+07	1.85417e+08	4.29335e+07	6.53482e+07	2.02875e+08	1.0433e+08	3.14462e+08	2.05508e+08	1.76844e+08	1.68199e+08	1.33597e+08	1.8983e+08	1.34089e+08	1.73296e+08	2.47708e+08	2.00694e+08
LRP1	2.39572e+06	1.66538e+06	3.48927e+06	2.35319e+06	2955940	6.35673e+06	1532695	3.03048e+06	3.59169e+06	2.61566e+06	1.47745e+06	1.59907e+06	1.65062e+06	4.00524e+06	2.01424e+06	9.6394e+06	2.07513e+06	2.31809e+06	2223091	3099108
LRP2	2.84046e+07	62345400	63363960	2.51979e+07	71075950	42490400	49382485		5.90522e+07	61683800	62200284	34748010	7509300	3.43452e+07	30016650	57052900	5.24384e+06	3.96838e+07	3616835	56398420
LRPPRC	1.63461e+07	523476		2.52471e+06	9.26138e+06	2.06696e+06	6.75241e+06	7.54163e+06	1931645	3574290	1918055	3.69679e+07	2.9422e+07	8511165	52938375	133094	8.09688e+07	3433940	20286080	2.4219e+06
LRRC57	935585				3757215	1.6719e+06	1207690	4.0676e+06			3626660				4905955	4581875	3797025	2502165
LSAMP	641127							103435		676091	769664		129433				954522		745441
LTA4H	389898	122460				169332500	102747	182515980	842585	748468			501692			1212510	441010	105516		1.84521e+08
LTF	2.21909e+07	2.88552e+07	4.15992e+07	2.93645e+07	3.25754e+07	2.20512e+07	2.53101e+07	2.13553e+07	2.93204e+07	2.5611e+07	3.06868e+07	2.69446e+07	3.01478e+07	4.31242e+07	2.58592e+07	2.42569e+07	2.49089e+07	5.08117e+07	1.58447e+07	3.87206e+07
LUC7L	265851	6.94504e+06	615520	632806		40573.3	198192	277836		716963		237026	7.71207e+06	568724	5896204	928218	8.42871e+06		10605850
LUC7L2	265851	6758875					198192					237026	7.05872e+06	341152	4877694		8.02653e+06		10605850
LUM	3.78212e+07	6.84941e+07	3.58717e+07	5.9522e+07	4.94504e+08	7.34925e+07	3.2516e+07	3.71707e+07	3.56353e+07	3.70711e+07	3.10822e+07	6.07298e+07	6.40548e+07	4.95798e+07	3.16286e+07	2.88212e+07	3.37251e+07	4.4789e+07	2.9995e+07	4.35925e+07
LYN	4.84235e+06			12813165		1.08607e+07	5.80798e+06	23490600				279752	1681767		1.91187e+06	7.92524e+06	2091400	1.10022e+07
LYVE1	7.621e+06	8.51654e+06	9.94723e+06	1.20935e+07	9.00776e+06	7.37164e+06	8.25966e+06	1.01539e+07	1.09596e+07	1.07846e+07	8.62433e+06	9.93552e+06	9.06483e+06	1.12481e+07	7.96256e+06	9.02453e+06	9.86462e+06	9.9959e+06	6.5697e+06	9.35436e+06
LYZ	1.06014e+06	986771	737331	1.14014e+06	802137	859464	744250	815998	1.16136e+06	961259	980689	1.05834e+06	942538	735648	1.03839e+06	1.05607e+06	908688	915407	1.26144e+06	863476
MACROD1	857125	1722660				1.08061e+06							1.29493e+06				237186			1243090
MAD2L2	3.07523e+06				12140700	3000455						5201450		3672000	4726845		2743335
MAN2A1	47505100	43188940	7.00777e+07	6.26303e+07	5.90778e+07	68618000	8.54805e+07	6.87878e+07	7.66736e+07	85343276	65113450	8.69406e+07	8.56046e+07	58881100	9.2961e+07	5.50864e+07	4.90192e+07	78049673	6.85967e+07	9.20327e+07
MANBA	1594975			2200370	1884825		1607805	1846100	2.69726e+06	1.96208e+06		780230	1926175				901450
MAP1A	1.30364e+07	37448325	42575450	20516800	21617750	21421550		44190750	42952300	21844600		19138175			28294300	38945650	30505340	18513950		41248750
MAP1B	2602379	1.40556e+07	2.63183e+07	1711700	9.71273e+06	14602075	13151421	1.67708e+08	1885965	10987400	2.37651e+07	96754660	3269440	107987156	96259000		25798030	4398020	1.83463e+07	1843466
MAP2K2	1.45622e+06	957506		1.61866e+06	873019	722595			1.03976e+06				1.30171e+06	1.21295e+06		776068	597641	0
MAPRE1	19122850														1.71022e+06		1700710
MASP1	6.92012e+06	7.78588e+06	5.64769e+06	8.26671e+06	5.82965e+06	2.69468e+06	4.71388e+06	3.03022e+06	1.09501e+07	1.09465e+07	6.24497e+06	2.19455e+06	1.01537e+07	9.8948e+06	3.18547e+06	3.06902e+06	2.93278e+06	7.16744e+06	5.42916e+06	5.88081e+06
MASP2	1.2805e+06	1.15193e+06	1.62434e+06	1.19491e+06	967200	878983	1.26843e+06	904317	1.72378e+06	1.20093e+06	1.2762e+06	1.04761e+06	1.47306e+06	1182524	1.09527e+06	1696658	1.10655e+06	1.00687e+06	1.04425e+06	1.93619e+06
MAT2B	3480210	2564560	3470450		1651475	742877		8471960	3075270	1781510		373797	3063070		3716705	3832160	2442780	4547490	3265390	1.0709e+06
MBD3	828105					154128				2229185										377133
MBL2	924576	1.01596e+06	1.80299e+06	1.18808e+06	1.52907e+06	2.11732e+06	692706	3.25073e+06	1.30047e+06	966895	1.27005e+06	1.14301e+06	1.1716e+06	1.63109e+06	982482	361709	2.84049e+06	1.46184e+06	2.67373e+06	1.62506e+06
MCAM	2.89951e+07	50591829	198451	3.06615e+07	219094	277201	376985	4.64908e+07	3.03285e+07	5.49877e+07	4.61061e+07	9333165	39528950	24736879	3.31196e+07	2.03981e+07	5.84115e+07	477525	30675575	57286522
MCCC2	1.22631e+06				2406650	2.11829e+06	6.47231e+06			4961550				1786070	2432460		2.9427e+06	4.96387e+06
MCM2	20798100	2.19081e+06		0	1859840	8.80628e+06	1.20357e+06	897739			1.15086e+07	16212050			1539510	1.51742e+06		2.23149e+06	50598155
MCM3	629658			638856								100865					1.56496e+06
MCM7	9.26918e+06	1447870	1.32515e+07	14003900	608619		963782	1.67516e+07	1.04816e+06	11507650		1048920	13648990	15412150	649644	12436218	9.69305e+06	11312625	12984500	15839550
MCTS1	2.42256e+06	1.3873e+06	2.23399e+06	1432487	5195610	1.80228e+06	1340430	3.11781e+06	1306072	1.73014e+06	1.00492e+06	1.34694e+06	1.7535e+06	1.22997e+06	1.15537e+06	1.24239e+06	1478018	2.13331e+06	2.12643e+06	3307461
MDH2	5.03264e+06	4.00235e+06	7.81728e+06	5.01968e+06	5.18231e+06	2.13628e+06	2.98217e+06	5526575	5447840	5725750	5319590	4.50058e+06	7022630	3.97745e+06	4.47863e+06	3.28671e+06	5.01006e+06	5.74787e+06	4.13025e+06	3492925
ME2	30086940	20141425	1.32697e+07		30620913	701760	21338525	1.60172e+06	2.29899e+07	3.45243e+07	1.98395e+07	2.78898e+07	29221700	16385050	3.57632e+07	20978200	21943150	12506960	2.13685e+07	28110810
MEAK7	2.06963e+07	2.04481e+07	24859400	28576880				21907070	28101274	1.93791e+07	31382700	19416400	12327700	26731300		2.01572e+07	2.54498e+07	2.96698e+07	21409855	3.42227e+07
MED30	2.66368e+07	30328760	23496500	30297240	3.52277e+07	2.81241e+07	2.91426e+07	35826400	3.40751e+07	3.47999e+07	3.28398e+07	2.85682e+07	3.3057e+07	3.08396e+07	4.54459e+07	3.29062e+07	3.29146e+07	3.59062e+07	4.09105e+07	3.49565e+07
METAP1	8617046		6.78467e+06	8163420		20250560	6897962	7.98841e+06	10952300	1.50031e+07	22528720	4465106	4738742			3025990	7.08078e+06	9156590	4.94888e+06	3043770
METRN	6534100	13270400	5434000	12548180		9957400	9991275				8930240	9092720		6271100	8135902				9503200	10431400
METTL18	2.77628e+06	3.12863e+06	3.36793e+06	3.2038e+06	3.60515e+06	3.02425e+06	3.33506e+06	3.35288e+06	2.79845e+06	2.6594e+06	3.12814e+06	2431860	3.09651e+06	3.77568e+06	3.00903e+06	2.77243e+06	3.24561e+06	3.24307e+06	3.26219e+06	3.49748e+06
MFAP4	3.80229e+06								8030330			6620240		9195220		7135425			5.44601e+06
MFGE8	2.51218e+06		2.02079e+06	1814752	1.98635e+06	913670	2388600	2.29495e+06	1841616	2.06576e+06	3334270	2.07854e+06	2.18354e+06	1.78506e+06	2.11744e+06	2.04115e+06	2.34111e+06		1946360	2.18333e+06
MGAT2	1.28776e+06	1.12453e+06	2.05682e+06	1.89833e+06	2870730			1608728	2445345		1.81271e+06		3303640				3009635		1565515
MGLL	1.47779e+06		136149	138779	185636	184116	667007	125808	126695	193261	137788	123492		135143	202936	137259	134048		952040	118907
MIA3	1.05059e+08	1.30461e+08	1.54521e+08	1.12944e+08	1.37335e+08	5.47533e+07	1.37213e+08	1.18169e+08	1.29912e+08	140135390	1.21223e+08	1.54128e+08	1.1902e+08	1.2759e+08	1.40245e+08	1.17432e+08	1.33166e+08	9.17608e+07	1.16014e+08	8.88778e+07
MICAL1	1.28075e+06		568918		1178350	1269510		298040			252035
MICALL2	4397090			5885837										360514	1.59497e+06		3.6567e+06
MIF	1.91983e+06		6673965						853120		2845070	2.7947e+06	1.30867e+06	3788735		1775700		3694662		2300230
MINPP1	5385645	34441311	5.26059e+07	21776075	27722175	2.10553e+07	1.64854e+07	37471400	51042925	5.17517e+07	3.69793e+07	49739600	4.64795e+07	57786900	5.55239e+07	2.02167e+07	3.74629e+07		3.35802e+07	75120850
MMP10	1728500	1781120	1.49174e+06	2560805	1.68079e+06	1523745	2.34795e+06	1.08679e+06	2222220	1.45223e+06	1476251	1429635	1.22445e+06	2347955	1.32014e+06	2.27188e+06	1.75279e+06	1366510	2.50537e+06	1632370
MMP2	4.28204e+07	460437	3.69681e+06	4.15646e+06	3.48679e+06	2.85848e+06	193950	4.9919e+06	2787980	3.07913e+06	4.03566e+06	2987396	4.44862e+06	8.47588e+07	4.35455e+06	4561480	3.26949e+06	3.55663e+06	4.0358e+06	5.00425e+06
MMP8	4.3e+06	409475	1.3235e+06	1.40119e+06	2.50077e+06	5.2682e+06	1.11472e+06	932923	736511	3822704	2.43486e+06	1.28632e+06	4.11969e+06	958170	1.85513e+06	1.00104e+06	1.41437e+06	8.8239e+06	1.4611e+06	360725
MMP9	1738920	708995	1.13009e+07	1461348	1.29139e+06	559420		2.31741e+06	1.95315e+06		4.26665e+06	2752326	2978535		1330195	2.38023e+06	2995386	4.65637e+06	1.36974e+06	4.81753e+06
MMRN1	329425					51179		229245			43098.8	494014	156135	194238	272922		232907	105677		1016010
MNDA	2.72931e+06	4.13926e+06	5.49486e+06	3.70364e+06	3.44747e+06	2013155	3.18424e+06	3.7087e+06	4.22843e+06	2.47146e+06	4.34615e+06	3.2312e+06	2247715	6.04268e+06	4.69378e+06	2.95788e+06	3.96183e+06	5.05467e+06	3.1732e+06	3.93505e+06
MOSPD2	987275	2.34323e+06	1.76735e+06	1.40766e+06	1.3679e+06	1.59034e+06	1.12729e+06	1.02624e+06	1.40998e+06	1.49377e+06	1.39597e+06	952197	1.7867e+06	1.59601e+06	1.9666e+06	1.89149e+06	1.39187e+06	1.9045e+06	1.81033e+06	1.55304e+06
MPI	328073
MPO	6.8748e+06	1.14767e+07	12369488	7.79419e+06	5.54713e+06	1.93392e+07	5657895	1.39085e+07	3.74684e+06	1.63022e+07	1.22998e+07	1.68193e+07	1.75401e+07	1.08009e+07	8539688	7985295	6.44983e+06	1.9514e+07	4.39768e+06	1.55031e+07
MPST	354342	9624440	2.34987e+06	159986			2878722	12743775	3285315			1668305			6002439	1.78634e+06			2256218
MRPL2	6.3941e+06	8364200		7796420	7.77228e+06		6.08794e+06	4.34303e+06	7.7089e+06	6.81664e+06	11482750	7.66785e+06	1.0088e+07	8.36523e+06	7328022	8.78051e+06	7.00942e+06	6513520	6220919	4.62667e+06
MRPL44	514193	223454		309980		340133	319273	526760	249182	185621	313006				451075	341704		195088
MRPS25	54148		64898.5		179188		66643.3	145274	68024.6		101516	66643.8	57778.8		88753	40590.3	139234	161954		62022
MRPS28	1815140									10972925				6.81567e+06			11970250	12119805		5.39659e+06
MRPS36	9227380		14950800			8332650		1.10796e+07	8025190					6288000	1.00993e+07	9.76844e+06	9533550	10568520
MSH2	4373438	5.34329e+06	5.8394e+06	2.84774e+06	4.45608e+06	2.59097e+06	3.83661e+06	3041070		3207407	3.3602e+06	3.8532e+06	10200000	3.23712e+06	3.36934e+06		4.69841e+06	4.53199e+06	4070085	3.28001e+06
MSL1	6550060	5.72247e+06	10828900	7.3545e+06	7491880	10239885	1.0949e+07	7.50811e+06	7950360	3331190	1.06975e+07	7618775	7673780	10509550	6354702	9991215	7.39519e+06	9.85082e+06	8620245	8606610
MSN	2.63792e+07	1.81269e+07	2.12329e+07	3.37476e+07	1.39462e+07	2.82408e+07	8.99862e+06	1.90775e+07	2.31956e+07	2.1692e+07	3.0092e+07	2.07554e+07	1.86154e+07	2.39181e+07	2.87954e+07	2.79233e+07	3.17765e+07	1.04574e+07	1.8026e+07	3.20038e+07
MST1	2.30678e+06	1.41302e+06	2.76874e+06	2.84393e+06	3.05172e+06	2.25287e+06	3.84408e+06	3.50481e+06	3.27101e+06	2.75775e+06	2.24314e+06	9.89444e+06	2.32021e+06	3.54527e+06	5.20381e+06	2.21728e+06	5.17693e+06	1.32978e+06	889298	4.17157e+06
MST1L	436434	958013	620965	1.51318e+06	1.62461e+06	1.923e+06	3.51838e+06	3.23593e+06	2.09358e+06	1.97298e+06	1.19904e+06	8.51476e+06	1.68436e+06	2.21258e+06	4.24514e+06	1.43578e+06	4.1362e+06	164753	889298	2.91632e+06
MTA2	4.46449e+06	3.28523e+06	1.17829e+06	1.84647e+06	1.90518e+06	4.66505e+06	4.69515e+06	6.90773e+06	3.52182e+06	6.51008e+06	2568310	2.37915e+06	1.30444e+06	2.68535e+06	2.1683e+06	774828	4.88027e+06	1.95917e+06		3374947
MTHFD1	2.52623e+07		22550200			2747655	413562	2.66849e+07	636917	3.20023e+06		1.39276e+07	5858740	2.17924e+07		2.95843e+07	821596	1.9788e+07	34441325
MTMR2	2.32649e+06												219954
MTMR3	3078140	4320860	3.50607e+06		4.29922e+06	5162665		2267455			3580958	4175740	0	3.27096e+06	3364150	2131835	5296920		0	4167985
MTOR	158229	3.3992e+07	236172	232858	268691	213270	178553	184984	144464	273236	195204	102606	204328	299020	270470	215631	175524	286940	243590	191755
MTREX	13475080	18839950	1.52087e+07	1.89328e+07	7475960	19731400	8679300	1.51274e+07	13775300		1.51956e+07	1.35416e+07			8447223	1.82178e+07	1.48758e+07	21600300	2.20512e+07	20209280
MTSS2	0					162246
MUC1	2495660	453454	731640	1084750	492696	963776	398086	0	880287	312332					808233	747664	483332	505175	687386	873825
MVD	313240	124170				253165	222052	204038					156174			248370	349844			353790
MX1	8492240	9082690	9654770	5137025	14002600	11702400	8103125	11459200	8991640	17174720	7002475	9585445	1.04091e+07	13423200	12674955	10002800	14182800	14931900	8383350	7523410
MXRA5	466996							644046					848262	256876					674933
MYH1	483226	1.02661e+06	1.09576e+06	1.14526e+06	1.16162e+06	993669	14574.5	537912	1.04763e+06	1.25739e+06	1.00494e+06			1.14175e+06		975129	1.13661e+06		1.04561e+06
MYH10	19246700	22550964	1.34142e+07	2.05571e+07	2.56114e+07	1.68461e+07	3495755	16934775	1.01468e+07	23432700	470156	1.92605e+07	188152	2.10764e+07		5553649	1.55757e+07	2.98877e+06	3.4372e+07	387165
MYH11	3.70954e+06	5.02685e+06	1.47844e+07	3.89647e+06	3.43749e+06	1.29325e+07	1.74481e+07	4.32242e+06	5.00427e+06	5.66933e+06	5.11834e+06	3.0384e+07	4.39e+06	1.98202e+07	2.29154e+06	3.2131e+07	7.48709e+06	7.2431e+06	4.3369e+06	1.34379e+07
MYH14	4300085	9.48246e+07	76047705		1.98926e+07	85590100	214737	1.06697e+07	1.08867e+08	540767		17859356	214499	1.20281e+07	1.44567e+07	16639615	1.5171e+07		6.00548e+07	124491290
MYH2	483226	1.02661e+06	1.09576e+06	1.14526e+06	1.16162e+06	993669	14574.5	537912	1.04763e+06	1.25739e+06	1.00494e+06			1.14175e+06		975129	1.13661e+06		1.04561e+06
MYH3	483226	1.02661e+06	1.09576e+06	1.14526e+06	1.16162e+06	993669	14574.5	537912	1.04763e+06	1.25739e+06	1.00494e+06			1.14175e+06		975129	1.13661e+06		1.04561e+06
MYH4	483226	1.02661e+06	1.09576e+06	1.14526e+06	1.16162e+06	993669	14574.5	537912	1.04763e+06	1.25739e+06	1.00494e+06			1.14175e+06		975129	1.13661e+06		1.04561e+06
MYH6	483226	1.02661e+06	1.09576e+06	1.14526e+06	1.16162e+06	993669	14574.5	537912	1.04763e+06	1.25739e+06	1.00494e+06			1.14175e+06		975129	1.13661e+06		1.04561e+06
MYH7	483226	1.02661e+06	1.09576e+06	1.14526e+06	1.16162e+06	993669	14574.5	537912	1.04763e+06	1.25739e+06	1.00494e+06			1.14175e+06		975129	1.13661e+06		1.04561e+06
MYH7B	483226	1.02661e+06	1.09576e+06	1.14526e+06	1.16162e+06	993669	14574.5	537912	1.04763e+06	1.25739e+06	1.00494e+06			1.14175e+06		975129	1.13661e+06		1.04561e+06
MYH8	483226	1.02661e+06	1.09576e+06	1.14526e+06	1.16162e+06	993669	14574.5	537912	1.04763e+06	1.25739e+06	1.00494e+06			1.14175e+06		975129	1.13661e+06		1.04561e+06
MYH9	3.20566e+07	3.14549e+07	4.64795e+07	4.04942e+07	5.92059e+07	2.42902e+07	3.27867e+07	2.38061e+07	2.46758e+07	2.71838e+07	4.81672e+07	3.1404e+07	6.33347e+07	5.62626e+07	2.97093e+07	1.45738e+07	2.75407e+07	2.98906e+07	4.86462e+07	2.11432e+08
MYL12A	1.86342e+07	3.18607e+06	1.68161e+07		52268.1		119348			8660800		0	242246	44437.2	8.27705e+06	83268.5			184402	40593.1
MYL12B	1.86342e+07	3.18607e+06	1.68161e+07		52268.1		119348			8660800		0	242246	44437.2	8.27705e+06	83268.5			184402	40593.1
MYL6	7.04989e+06	9.68614e+06	1.1953e+07	16897515	10699100	1.02922e+07	7661020	9993273	9.58689e+06		1.7167e+07	1.01792e+07	8.42687e+06	1.06364e+07	1.12257e+07	5.55524e+06	8.67426e+06	1.34371e+07	12105780	12196900
MYL9	1.86342e+07	3.18607e+06	86903.6									0	242246	44437.2	277397	83268.5				40593.1
MYO18A	4729876	4283751	6952650	734091	7.23792e+06		6.88994e+06	5.8807e+06	3.54519e+06	7.4445e+06	5.06437e+06		4.85676e+06	10910640		13512595	5.42582e+06	3397254	6.60399e+06	5.1801e+06
MYO1A	13785800	2.92531e+07	1.32402e+07	4.72089e+07	140963	2.11853e+07	19317325	12108700	23989600	13401101	12736900	25771625	3.03727e+07	9685300	53926	1.35252e+07		3987100	1.64165e+07	21718995
MYO1B	2.95116e+07	4.15046e+06	5.63498e+06	25094325			4590825	899713	964645	1.66303e+06		8.31254e+06	7.05456e+06					3987100
MYO1F	264388
MYO1G	1.45165e+06			1.53617e+06	197216	1156337	532550		1.18189e+06	1355642	894165	1.36128e+06	796728		378040
MYO5B	1558285	30632.3		46901.9	39881.2	19192.7		42326.8	35337.5	434411			34380.1		30635.8	28306.7	18156.8		36610.5	13955.4
MYOC	34919680	48025700	64280500	36784025	24071050	21864850	44111100	54469400	40457200	43166880	44998800	41661550		1.69525e+07	55168350	29111840	10259500		16600500	46947600
MYOF	1.16979e+07	19861545	822957					13784150	32515650				435499	28481000
MZB1	3650335											2.03153e+06		1.30113e+06						2.13522e+06
NAA15	3.39023e+07	4.41385e+07	5.50624e+07	7.02796e+07	52185720	1.14969e+07	79624200	47607450	4.35854e+07	22424720	4.96316e+07	40555125	4.63244e+07	50935845	4.31139e+07	5.91776e+07	5.18246e+07	6.25943e+07	50250131	7.63516e+07
NAGA	382275	1.20858e+06	0	212915	830696	1.17948e+06	180230		333074	405809	275310	117077	3.46732e+06	282232	514744	159529		164145	158570	532104
NAGLU	217512	3565680	769090					4441317		2010860		859440	135388	1881354	16610710	28577850		9.83248e+06		948372
NAMPT	6.89727e+06	9.64777e+06	5.14e+06	3.34678e+07	11992700	9.10349e+06	1.06705e+07	11829435	1.40594e+07	1.13468e+07	2.32975e+07	1.6015e+07	1.59516e+07	1.46588e+07	1.35212e+07	7.02489e+06	8.10899e+06	7335500	1.4156e+07	1.78344e+07
NAP1L1	1.7241e+07	1.68703e+07	1.95158e+07	1.52709e+07	1.84655e+07	16163450	1.81988e+07	2.01964e+07	2.15082e+07	1.91669e+07	2.03366e+07	1.32251e+07	2.09731e+07	24479900	1.10443e+07	1.95887e+07	1.86656e+07	21483720	1.50768e+07	1.61539e+07
NAPG	8568010			8215110					9873605					8919480					7497862
NASP	16132050	36092250	33814900	18600900				0		19692200	55939400	38358750			51143950	45933400	68881450	37525400	22101350
NAT8	1125245	652935						1634040		1319065	1103077	994116			0	610625
NAXE	0	1.39908e+06								2.54179e+06				1.3333e+06					2233930
NBAS	1468290																247034
NBEAL2	118370		467101	383980			907395					258847	791799		1.67487e+06	169907		297417
NCALD	87892.7	101826	158142		181793		118623							349692			140681	55193.2
NCAM1	8140070	7744240	3708510	7990650	3886290			3875160	4406625	8182275		19706400	368384	0	8.73139e+06		8777360			9678930
NCAN	783002	1.63279e+06		4737485	1143545	6.18041e+06	755809	1.07142e+06	3269460	4276525	974385	2.52995e+06		1.87297e+06	3.55786e+06	399462		2.84772e+06	2.30321e+06	1.63014e+06
NCF1	3.26682e+06	2.0226e+06	2.58685e+06	3.44149e+06	4.31483e+06	1.66836e+06	1.34102e+06	2.52164e+06	6.50611e+06	1.43102e+06	2.33687e+06	3.59059e+06	7.35897e+06	2785900	1.55714e+06	3538320	2877980	2.90797e+06	3.31561e+06	3.15315e+06
NCF1B	3.26682e+06	2.0226e+06	2.58685e+06	3.44149e+06	4.31483e+06	1.66836e+06	1.34102e+06	2.52164e+06	6.50611e+06	1.43102e+06	2.33687e+06	3.59059e+06	7.35897e+06	2785900	1.55714e+06	3538320	2877980	2.90797e+06	3.31561e+06	3.15315e+06
NCF1C	3.26682e+06	2.0226e+06	2.58685e+06	3.44149e+06	4.31483e+06	1.66836e+06	1.34102e+06	2.52164e+06	1.9997e+06	1.43102e+06	2.33687e+06	3.59059e+06	2.48527e+06	2785900	1.55714e+06	3538320	2877980	2.90797e+06	3.31561e+06	3.15315e+06
NCL	11124885	1.09753e+07	3.28745e+07	16322220	6.75764e+06	1.58832e+07	1.98495e+07	26824020	1.82646e+07	1.69411e+07	2.74225e+07	1.19585e+07	1.68341e+07	1.77065e+07	1.79224e+07	1.92186e+07	1.88426e+07	1.17591e+07	9.9823e+06	1.46541e+07
ND4	1231875
NDC1	36066200			43636800	3.08174e+07		28357725					31074675				28984300		2.73398e+07
NDRG3	957317					2.44452e+06	3637240	5218040				1571882
NDUFA11	286294																			86703.2
NDUFAF3	2.25357e+07	13707000	2.59211e+07	5.67062e+06	2.76482e+07	17844505	3035916		18478500	14068620	1.16122e+07	1.17851e+07	1.91397e+07		1.46199e+07	12501252	1.08081e+07	16740185	22862310
NDUFB4	832278	1.01188e+06	1.01514e+06	934696		641893	1.05383e+06	1.0059e+06	944975	1.14366e+06	886013	1497335	1.03114e+06	1.38858e+06	815167	840226	1.04859e+06	968086
NDUFV1	26060825				8787950	3.09853e+07		30354300								28053350	13710200			11193900
NDUFV2	584980			1073475							820287		1397080						1352500
NELFB	1.19815e+07	9529050				13659180	9267800					14006450		14438740		1.2688e+07		12322400		12157000
NEO1	178511	316256	169451	201990	210486	200945	149092	145968	290881	868486	273210	133082	194620	140426	160420	940426	1255670	203893	184050	298128
NFATC2	998633
NFKB1	1.01292e+07	9.60497e+06	20775520	5.74334e+06	8.5101e+06	5.81843e+06	1.35701e+07	9673594	8.82995e+06	1.05626e+07	8.55686e+06	9.93708e+06	8063061	9.97618e+06	8898671	1.25812e+07	9.80094e+06	1.34233e+07	1.21773e+07	8.52273e+06
NID1	4644877	3956324	8.34097e+06	5.21003e+06	6.19783e+06	3246905	5914969	6.60356e+06	5.30151e+06	6.19244e+06	3.26114e+06	6.74825e+06	1.66228e+07	7.23649e+06	6135660	5.1943e+06	5.4829e+06	5838588	9.05271e+06	3.71285e+06
NID2	3177750	117108000		817644	22840350	2362170		10716050			2241890			70490100	4735070	4.74077e+07			0	3.62546e+06
NIT1	6175605				69501.9				575715
NIT2	2.40184e+06	2788388	6992370				3544395				2374900	3.0872e+06	1.38717e+06	4.29717e+06	3.59953e+06		5161888	4.57e+06	4.40804e+06	3.61884e+06
NKIRAS2	1598880					1616705							901030			1666055				1893975
NME1	1.32281e+07	1.45047e+07	1.58181e+07	148845	210283	9.13853e+06	319259	303786	7.51324e+06	1.57577e+07	1.90118e+07	1.13467e+07	9.69167e+06	1.16935e+07	1.63582e+07	1.17531e+07	1.49368e+07	7.68946e+06	2.24192e+07	1.48643e+07
NME2	232465	227818	208914	148845	210283		319259	303786	78973.3	335774	196028	46437.1	343532	195961	233796	280866	156713	205163	198631	376933
NME2P1	232465	227818	208914	148845	210283		319259	303786	78973.3	335774	196028	46437.1	343532	195961	233796	280866	156713	205163	198631	376933
NMNAT1	1595320				1133960	1530665							1702130		1387140			1.61966e+06		922225
NNMT	301983	1.29558e+06	3186990	1.35257e+06	1.12984e+06	1066834		2.06161e+06		688388	0	0	495417	1438723	1.95264e+06	333643	1.40995e+06	1.89435e+06	718301	1.51099e+06
NNT	4.06188e+06	5.51614e+06	5.21454e+06	5.14693e+06	5.21558e+06	5.57792e+06	3582736	5.1582e+06	6.24312e+06	4.29818e+06	4960505	2926780	4897348	6.05167e+06	5.38622e+06	4.5262e+06	5024105	5392084	5.41592e+06	4.97513e+06
NOL9	7344161								1.2336e+07					9508820		8297140			4951670
NONO	576101	3.92293e+06	1.72541e+06	1.95388e+06	1.30986e+07	1.0929e+06	1.61949e+06	4.17367e+06	6.02296e+06	5.86498e+06	1.66144e+06	9.2994e+06	1.42443e+06	758119	4.98386e+06	706691	6.85117e+06	969367	1.75279e+06	1.49231e+06
NPEPPS	546858	614657	1.66227e+06	466979	1.33681e+07	449286	530778	546654	15670361	1.70552e+06	4.26338e+06	406241	3714761	1.06725e+07	13376147	1.8721e+06	1.90307e+07	3.77352e+06	741424	1.48996e+06
NPM1	1.95275e+06	3.6024e+06	3530450	2120930	2.6533e+06	2.86174e+06	4.29537e+06	2.81233e+06	1413570	3.48306e+06	3.46147e+06	4.27247e+06	2406832	2851870	2.46185e+06	2.47239e+06	2.25761e+06	3.42942e+06	3.58263e+06	2325025
NRCAM	3916225	620087	7911480			6987850			1165705						5451000			5774919	1900750
NRP1	2.48693e+07	9.96413e+06	1.72183e+07	35674165	0	29476560	3.4837e+06	32477685	3.34101e+07	3.6153e+07	3.07924e+07	3.04389e+07	2.98451e+07	22234900	10430604	20168450	32043325	3.28885e+06	3.7851e+07	3.13872e+07
NRXN1	15785800			17516000	2.58866e+07	33284450					42204800
NSDHL	8.75819e+06							4679555	1505740				756405			205888			4097500
NSF	9828580	46731000	12266390	113952	5320714	4946100		1.04666e+07	61287055				6680550	7587200		4.0595e+07	2.47674e+07	108857	4360755
NT5C3A	3.3784e+06		5705575											6286525						5066370
NUBPL	73909000	140947000		4707735			1.45154e+08		1.48304e+08		147793000	0					159989000	149109000	77296500
NUCB1	120775	12111300	7689751	6776450	8.66833e+06		9.9883e+06			1238700	8.42193e+06	10794100	7.47942e+06	1846510		0	4883070	2.17099e+06	14291100	6657100
NUDC	0		6.81911e+06	100120		2673995	5777680		4.21629e+06	8.24398e+06	5019420	1086266			2.89413e+06	4531540	2851835		3630970
NUP133	523961	848668	841706	737675	915141	671648	597252	758679	834761	667228	741489	304844	684138	935885	769518	774663	459359	803217	588187	657076
NUP205	1.44463e+06									597413									459413
NUP88	1168830
NUP93	209845			629806				825070				651973			470273			656852	989268
NUP98	1.40833e+06	1.12567e+07	2.68922e+06	1833560	1.64326e+06	7.19494e+06	1.41292e+06	7.71705e+06	2.22185e+06	8.11061e+06	1.16844e+06	1.46869e+06	1.49168e+06	1.81926e+06	9.36786e+06	11587446	6.98522e+06	1.52357e+06	7.54909e+06	8616137
NUTF2	1.06091e+06		5.11922e+06							543410
OAS3	2452450	1112845	148368	176538						249259			2.26158e+06	3.47303e+06			1.37035e+06		235314	195972
OCRL	180016				251907									212543						190002
OGDH	589627	1.04457e+06	7.33817e+06	2.12077e+06	1557170	1705002	2.37795e+06	1421903	1639095	4.48131e+06	2.88547e+06	1.20326e+06	1.17341e+06	791369	1041696	2.15713e+06	764020	1.493e+06	1508555	1083056
OGN	4846533	1288575	1111504	2.91546e+06	1.89359e+06	2.39344e+06	2.00597e+06	3346150		5.72251e+06	3.15136e+06	1680890	1.69779e+06	4.69074e+06	2237680	2086980	5.49156e+06	1.3481e+06	2000440	1.7381e+06
OGT	246527			109413
OIT3	2974030	4135375	6840750	5.35799e+06	7325804	4134630	7654640	8234540	6613168	6.1693e+06	5.97049e+06	4782720	7126354	6298790	4.08357e+06	4877880	4865506	6.7598e+06	5213490	5002465
OLFM1	733531	1.62613e+06	2.28844e+06	2.06471e+06	1.47487e+06	1.67585e+06	2.72239e+06	1.16051e+06	1.71614e+06	1057800	2.84209e+06	1.2359e+06	2.239e+06	865614	1.99674e+06	1.99128e+06	600562	1.87587e+06	2.17123e+06	953150
OMD	190955
ORC3	23665600							1.67376e+07		1.3005e+07		1.87616e+07							2702810
ORM1	9.07567e+07	1.11877e+08	1.22006e+08	1.09369e+08	1.15422e+08	1.07087e+08	1.13567e+08	1.12336e+08	1.19615e+08	1.22029e+08	1.15434e+08	1.03248e+08	1.05883e+08	1.13723e+08	1.28846e+08	1.08542e+08	1.12416e+08	1.21908e+08	1.07191e+08	1.17241e+08
ORM2	4.5962e+08	3.16951e+08	4.10816e+08	1.48725e+08	1.67499e+08	4.10875e+08	1.44668e+08	4.72973e+08	1.45756e+08	4.26796e+08	5.58461e+08	1.37047e+08	3.58386e+08	1.43389e+08	1.24497e+08	1.37867e+08	2.22082e+08	1.4545e+08	1.57085e+08	5.1986e+08
OSBP	4.9356e+06	6.01427e+06	5.33577e+06	1.03951e+07	5.66575e+06	6.8707e+06	6.94813e+06	1.00554e+07	8.08464e+06	8.69386e+06	7.16592e+06	7.00574e+06	6.39866e+06	6.46722e+06	6.15864e+06	9.69868e+06	6.22647e+06	7.4293e+06	3.17132e+06	6.93596e+06
OSBPL2	664595	248996					70946				828160	223221		993105
OSBPL8	209182		265226
OXCT1	412199		1.04453e+06	820945	791390	4279805			1.72555e+06		1241165						162773
OXSR1	2509770			3953152	36438.4		3.20408e+06	5.32359e+06	3.16602e+06			2.06617e+06		781472					2.59473e+06	4300272
P4HB	1.8941e+06	3.6874e+06	2.63108e+06	1.3522e+07	1.62741e+07	6.47966e+06	1.02312e+07	9.45254e+06	3.98329e+06	3.51915e+06	2.56305e+06	2.96751e+06	1.12771e+07	2.84962e+06	8.05458e+06	1.39492e+07	1.25318e+06	3.4664e+06	3.67954e+06	3.80389e+06
PAFAH2	905836					690136	987742			1241830	912140	1241920				841135				715160
PAICS	2.82588e+07	2.00468e+06	2.39747e+06	1.59071e+06	17707215	2.25939e+06	2.21668e+06	2.29261e+06	2.79703e+06	3.56925e+07	2857277	1.80875e+06	1.9293e+06	1.88672e+07	2266052	2.69258e+06	2.02631e+06	1.98685e+07	1.40841e+07	2.40188e+06
PAM	9.37203e+06	1.65131e+07	18419700	11858000	9.49567e+06	1.09001e+07	21276900	1.22409e+07	13490800	1.12877e+07	26662500	38962300	15074800	1.63907e+07	15634200	15352000	17404400	8340670	16032500	19362300
PAPSS1	1.2507e+07	1.80868e+07	1.02089e+07	1.97364e+07	7.64017e+06	9.38316e+06	1.18686e+07	1.0932e+07	16297564	1.21913e+07	9.22313e+06	1.41657e+07	1.63843e+07	1.27447e+07	5791390	1.07738e+07	1.0689e+07	8109325	9589125	5.89394e+06
PARD6B	1095621	505410			1.12277e+06			777546			638395	1270870			596133	940693			600200	1042260
PARK7	44475.8	10536650	6.33259e+07	62460300	5.95553e+07	2.65004e+07	52707850	43047300	49426920	70576700	2.9448e+07	22302920	6.64886e+07	4.22269e+07	74579900	3.04563e+07	72408410	64728530	5.08312e+07	32712055
PARP14	5.10401e+07	4.50755e+06	5225520	2.74854e+07	4527428	1.47036e+06	4.41045e+06	1.9738e+07	3.13041e+06	3.72569e+07	1.12147e+07	7261142	5.41081e+06	4.61306e+06	4.65918e+06	4797260	4.62804e+06	3.98175e+06	1.02472e+07	25411112
PBLD	838359	594025		1.23175e+06		1.02917e+06					1.05823e+06					1651210		2.60214e+06
PCBP1	2.14092e+06	1.40613e+06	4.90421e+06	4.11751e+06		2.54447e+06	1.3145e+06	5.846e+06	4.44254e+06		2.81199e+06	5248.95	4.79229e+06		4.83488e+06	109877	3.11508e+06		4.34202e+06	8842516
PCBP2	2.14092e+06	1.40613e+06	9.37594e+06	9.72627e+06		2.54447e+06	1.3145e+06	5.846e+06	4.44254e+06		2.81199e+06	5248.95	4.79229e+06		9.43784e+06	109877	3.11508e+06		7.41076e+06	5040061
PCCB	866631	786788	928391	596303	550908	656520	207994	269335	1.18225e+06	719045	320428	530858	342570	585485	420576	1.10879e+06	437984	492778	814638	488389
PCDH1	1576450				673386							928202
PCMTD1	22833450		28230450			52479400	51290200				50614100	22906900					49874100		44157600
PCNA	773069	2541037	2.85798e+06	3.32491e+06	3553700	1.44407e+06	2.03734e+06				1137730	649802			400154		1717748	762810		556492
PCSK9	2644567	7565775	655163	4588270	5.41924e+06	7223220	7325850	5854970	7820625	6.28261e+06		6201390	8257645		6006550	3361205			8243595	7.53059e+06
PCYOX1	1.08809e+06	1.63195e+06	1.66969e+06	2.74041e+06	2.0287e+06	1.29403e+06	1.35516e+06	1.82896e+06	1.49366e+06	1.6103e+06	1.26604e+06	1.19804e+06	2.88828e+06	1.18532e+06	1.77369e+06	4.07482e+06	1.02359e+06	1.71944e+06	1.74527e+06	1.10186e+06
PCYOX1L	1.28794e+06		1.30754e+06				637350	1.02215e+06	1764150		1531845		1.06784e+06		1.13359e+06	1.0722e+06		0	1.13978e+06
PCYT1A	569574	1063169	2707990		1.00922e+06	1183400	806268	1000485	1.05516e+06	685904	2603885	662707	1.06221e+06	813484		1.30675e+06	987637	716047	2519445	2.33076e+06
PCYT1B	569574	1063169			1.00922e+06	1183400	806268	1000485	1.05516e+06	685904		662707	1.06221e+06	813484		1.30675e+06	987637	716047		1.05708e+06
PCYT2	3612975			7050568								5.93036e+06	5.49242e+06		5.64027e+06	4682156	10160030		5688348
PDCD1LG2	1.87312e+06	2532110	2684196	2341765		1.88761e+06	3303865			4.19807e+06		4436738	4425700	2020135	3.19914e+06	3517204	0	2749390	1.39949e+06
PDE4DIP	3.19679e+06	5340380		3.7107e+06	3.45146e+06	3013847	4449558		7602160	5.76252e+06	8055220		4.29191e+06		5708444	2.00702e+06	5.64699e+06	3735255	5.80779e+06	6.01357e+06
PDHA1	16766350				108531	16627000	1.01061e+06		9608800			2.27288e+07		246803	28566300		92704.7	561572
PDHB	1.01981e+06	929719	929870	1.28409e+06	1.07562e+06	1.1859e+06	1.25083e+06	1.19012e+06	1.19896e+06	285906	581313	113998	814471	1.43401e+06	1.19965e+06	785173	1.03426e+06	236730	699270	1.49023e+06
PDIA3	792940000	386076145	720703350	265767	231485	1.92065e+07	1.00021e+06	1324080000	7.55351e+06	247021500	1568890000	4.22285e+08	112212000	1340261300	66192.1	45844	4511265	3037990		1.6481e+09
PDK3	304933			648825									632266		480677	447090		679312	497899
PDP1	247471			109577	377620			486157
PDXDC1	1.9097e+06	2.59944e+06		2136984			3603180	2.19647e+06	3903620	1.13027e+06	3273908		2.66046e+06	2.39241e+06	2.60994e+06	1.7806e+06	3011720		2440159	2.86314e+06
PEBP1	1.02097e+07	1.32757e+07	1.26205e+07	7.43168e+06	1.34562e+07	8352430	16756790	11643850	8.54115e+06	2.06004e+06	2.00789e+07	1.37534e+07	1.33738e+07	10863650	1.31721e+07	6.45403e+06	2.25257e+07	7399284	18587980	1.71796e+07
PEPD	3.20915e+06	1433203	5949098	4277715	3170396	785760		1475462	1.35331e+06	2845854	1558345	1.37274e+06	981464	2.70776e+06	2.25232e+06	1.3253e+06	801225	2.06029e+06	838884	4005458
PES1	804486	637665	856211	900222	726504	530244	743493	811393	617571	1.32963e+06	704283	1.0561e+06	1.15828e+06	1.33938e+06	1.21596e+06	813687	1.03001e+06	437533	1.07042e+06	417300
PFKL	1.3718e+07	1.28707e+07	2.03747e+07	28992725	1.58076e+07	1.10488e+07		1.41019e+07	1.92114e+07	16068950	11453600	1.37121e+07	12769950	2.4245e+07	1072395	15567745	7188200	13884300		9920680
PFKM	1.13728e+07	2.56108e+07	1.6256e+07	2.30963e+07	1.72481e+07	5.41342e+07		16185400	23377050	2.2104e+07	27369050	1.59171e+07	3.83175e+07	2.44599e+07	26144310	2.21477e+07	0	20724450	26609700	1.4271e+07
PFKP	447597	8.44717e+07	3.91825e+06		1.99953e+06	1.08136e+06		1.1504e+06	170175	252088		1.32983e+06	1.18135e+06	1.03049e+06	1072395	6.00826e+07	1.0455e+06		1.59533e+06	556992
PFN1	1.41618e+06	3.32483e+06	5.26701e+06	4.90651e+06	4.54246e+06	1.66747e+07	810389	1.92177e+06	5.44893e+06	1.66332e+06	2.14127e+06	5.02492e+06	1.24606e+07	4.94518e+06	1.10705e+06	7.75348e+06	2.66224e+06	4.17628e+06	4.71692e+06	8.20877e+06
PGAM1	223786	281160	575965	978656	356609	538720	232918	258310	175182	800345	153117	124232		1.1129e+06	235400		1.1685e+06			128318
PGD	1.54929e+06							1701043	108037	1.78285e+06	733687	2069980		2.37923e+06	1522220	3156795	9435816
PGK1	3.74784e+07	5.94358e+07	7.49498e+07	77655550	58768830	32877900	6.40328e+07	37698840	6.37528e+07	56281100	32502210	5.32839e+07	5.22477e+07	5.81721e+07	5.21778e+07	32824050	50571895	53046140	65517724	3.748e+07
PGLYRP2	1.9215e+07	2.72509e+07	2.06926e+07	1.92569e+07	2.07705e+07	2.19014e+07	2.7175e+07	2.43569e+07	2.22727e+07	2.40549e+07	2.77169e+07	2.61302e+07	2.17104e+07	2.07258e+07	2.4726e+07	2.27249e+07	2.3778e+07	2.20765e+07	2.79436e+07	2.44823e+07
PGM1	833308	1.1327e+06	8.84509e+06	2.69136e+07	1.89185e+06	1.61212e+06	1.38491e+06		2.9449e+07	2.64104e+06		1.43932e+06	3.70203e+06	1607992	1.69493e+06	1392678		1.01966e+06	1.17157e+07	2.289e+07
PGM2L1	300601	41941.9			404424			154125								16230.3				902740
PHB	1682060						401655					961080
PHB2	2846715							19375205								154801
PHF10	40545800							6.08052e+07	46416900	36826350				48865800	55058850				0
PHGDH	697307								542843								878718		5.09246e+06
PI16	1.15818e+06	8.69109e+07	2.36106e+06	6.00894e+06	1.75317e+06	463509	726291	522791	958654	8.3142e+07	971369	6.86998e+06	7.27714e+06	5.13145e+07	568879	467527	602362	1.07011e+06	8.38214e+07	646761
PIGR	484009	477636	3.06171e+07	2.65003e+06	1.03781e+06	159368	180299	1.44589e+06	3.19887e+06	248437	326256	862202	2.64991e+06	888694	2.33927e+06	345728	191769	135107	313049	3.89746e+06
PIGS	862907						717740		972907			1.29671e+06
PIN1	1.61807e+06	2968790	2.24784e+06		1.38814e+06		820145		1.4683e+06				2925662	2.33608e+06			2.08183e+06	1.20373e+06	2.33601e+06
PIP4K2C	1154630				510401		1276850	837985	665515							646360	1747180
PITHD1	427068						472314
PKM	5.20334e+06	1.59963e+07	6.41782e+07	1.17086e+07	1.58266e+07	1.44443e+07	1.40845e+07	3.08989e+07	2.02045e+07	2.24883e+07	7.37631e+06	1.69966e+07	3.34225e+07	1.9446e+07	1.78399e+07	1.35411e+07	2.13342e+07	6.13772e+07	7.65004e+06	1.88202e+07
PKN2	690002				15556622			776426	14845600	13004750	6542750									7.65928e+06
PLA2G7	1.14943e+07	8.62364e+06			3863760	210097	8.84439e+06	9.87942e+06	4.61239e+06	4511515	6161650	7.07851e+06	2936020	7.48288e+06	2557625	1.12435e+07	7957030	1.53887e+06		6.13633e+06
PLAT	207469					471129							697010		269731	1.09673e+06				559136
PLBD1	718393						1152290				0			1068170				1179280	1908700
PLBD2	2106207	2.85753e+06	1124690	1.21139e+06	1.84706e+06	2.2036e+06	1.03422e+07	1.52759e+06	1791490	10745615	1567285	1726770	5.38583e+06	1.18932e+07	1.85744e+06	2.06671e+06	1.17829e+07	1.92691e+06	1.74461e+06	2335344
PLCD4	414244					316518			241654					835656				782714	278996
PLCG2	9.63127e+06	53037850			36834335	44012150	10974650	3.60348e+07	65040850		5.84134e+07	59741800	33724800	57401250	4.04206e+07		50452070			64030150
PLCH1	2.74731e+06	3009288	2.48712e+06	1.46756e+06	2.79508e+06	1.93875e+06	2.45374e+06	1.57392e+06	3.18889e+06	3.10533e+06	3.44976e+06	2.63917e+06	2.5863e+06	3.54079e+06	1.76104e+06	2474585	3818780	3.29831e+06	2247040	3059045
PLEC	1.05929e+07	12257232	8.72447e+06	2.1097e+06	2.18232e+06	6.81667e+06	1.40781e+07	9.32549e+06	1.53657e+07	7.82904e+06	5432850	2.28942e+07	969162	3.91297e+06	8.11769e+06	1.89652e+07		4.97264e+07	2.46e+06	1.63471e+07
PLEK	139664			3226805	1378201		0		159298	1790340	395597						0	205014
PLG	9.52338e+07	1.15363e+08	1.23783e+08	1.26124e+08	1.20898e+08	1.13247e+08	1.10381e+08	1.13301e+08	1.12866e+08	1.33695e+08	1.15138e+08	9.30709e+07	1.10106e+08	1.32252e+08	1.26193e+08	1.06763e+08	1.29005e+08	1.26017e+08	1.22423e+08	1.1317e+08
PLGLA	6.03403e+06	8.31193e+06	7.45745e+06	7.80101e+06	7.63304e+06	8.39757e+06	1.57999e+07	7.57934e+06	7.03763e+06	8.24533e+06	8.34843e+06	6.62449e+06	6.69327e+06	7.68657e+06	8.38931e+06	8.55646e+06	8.46063e+06	8.32648e+06	5.89492e+06	6.98818e+06
PLIN3	2.87824e+06		78982.7	4284734	112646		4902720	42049.9	3.70204e+06	155612	98159	665769		125292	9500165	0	268607	9333650		64724.8
PLRG1	3.27494e+07		14373200	13375025	3.98171e+07	36784750	0	26443400			2.62504e+07	23654325	28640600	37096600		3.81255e+07	40193750	32523250	9798300	30778700
PLS1	63683.9	83925	90339.8	77493.8	101245	63756.2	65922.9	75736.6	58526.5	82968.7	65895.5	33415.5	90854.4	80596.3	86756.8	62233.3	940692	74223.2	86729.7	79413.2
PLS3	63683.9	554393	90339.8	77493.8	101245	848466	3.08105e+06	75736.6	58526.5	918245	65895.5	277929	5.3907e+06	80596.3	86756.8	62233.3	940692	74223.2	86729.7	888854
PLTP	6.19373e+06	9.17287e+06	6.90318e+06	8.89254e+06	7.36427e+06	7.78505e+06	5.86654e+06	7.51464e+06	8.57865e+06	7.83847e+06	5.85683e+07	6.4833e+06	7.67904e+06	6.71525e+06	6.84366e+06	6.43892e+06	7.26889e+06	6.3044e+06	8.98668e+06	7.52095e+06
PLXDC1	31948		160315	262246	224852	114873	105409	71982	207704	176998	171873		147858	190067	248026	126695	292761	132427	254556
PLXDC2	447118				590886			450044	5652.27				785946	278863		1596120				785456
PLXNB1	820853
PLXNB2	1.57312e+06	1.11569e+06	3.46603e+06	1.88282e+06	1.78686e+06	1.17743e+06	1.25765e+06	4.7067e+06	1.38164e+06	1.61449e+06	1.89037e+06	1.34613e+06	1.48394e+06	1.14043e+06	1.31883e+06	1.85095e+06	1.55899e+06	5.50578e+06	1.29572e+06	1.50302e+06
PNLIP	5100900	4830540	26959350	1.04506e+07	6492640	5.9657e+06	6.3349e+06	104378	36969.3	3.04482e+06	5325375	5619770	20885245	8.11978e+06	7.55963e+06	6851425	5.80085e+06	1.52703e+07	1004475	7.39545e+06
PNPLA6	2939700		1467900			1100600							1538113		1784065		2022975	2241700	2738465	1403570
PNPT1	289327500		148007500		2962922	139253500	313018500	168194500	320204290			0	2.19092e+06	297616000		3418875	140500695			139805000
POGLUT1	989680			2417880	3624460		4467580	5540820	5521600					4.58611e+06						5.34898e+06
POLR2K	4302100	3.37945e+06	2828495			1560150		2646475				1931480				1849705		3588360
PON1	1.32994e+08	1.46038e+08	1.44776e+08	1.51189e+08	1.49227e+08	1.31336e+08	1.40073e+08	1.55487e+08	1.45027e+08	1.58352e+08	1.37741e+08	1.35387e+08	1.43042e+08	1.65492e+08	1.33079e+08	1.25614e+08	1.45862e+08	1.64146e+08	1.22803e+08	1.4219e+08
PON3	1.89359e+06	1.53101e+06	1507394	1259620	2.24167e+06		698526	522532		3.00642e+06	799531	1.94263e+06	2.29823e+06	422302		1.06578e+06	421977	727480	464695	2.60757e+06
POSTN	4.4112e+07	6.13453e+07	4.05593e+07	7.04757e+07	5.73115e+07	6.95427e+07	6.16478e+07	3.92501e+07	4.77491e+07	5.09036e+07	2.85482e+07	4.39341e+07	4.00028e+07	2.933e+07	2.38749e+07	5.31482e+07	5.40189e+07	6.07863e+07	5.30369e+07	4.9884e+07
POTEE	2.1845e+06	2.3111e+06	2.05663e+06	1.42813e+06	3.05058e+06	1.48396e+06	1.80167e+06	1.19053e+06	2.26419e+06	2.74695e+06	1.57474e+06	2.24058e+06	2.21838e+06	2.6076e+06	2.8323e+06	3.02961e+06	1.36885e+06	1.64325e+06	1.55291e+06	2.55223e+06
POTEF	2.1845e+06	2.3111e+06	2.05663e+06	1.34498e+06	2.9479e+06	1.48396e+06	1.80167e+06	1.19053e+06	2.26419e+06	2.56571e+06	1.57474e+06	2.24058e+06	2.21838e+06	2.6076e+06	2.8323e+06	3.02961e+06	1.26943e+06	1.64325e+06	1.55291e+06	2.21842e+06
POTEI	2.70066e+06	2.88141e+06	2.94012e+06	1.19051e+06	4.38535e+06	846770	2.66541e+06	2.34998e+06	3.17184e+06	3.44256e+06	3.17181e+06	1.83165e+06	3.11169e+06	3.48052e+06	3.12226e+06	3.56064e+06	1.93562e+06	2.6134e+06	2.48817e+06	3.32161e+06
POTEJ	1.99383e+06	2.24383e+06	2.08991e+06	473159	3.54409e+06	115572	1.89911e+06	1.61524e+06	2.44299e+06	2.5915e+06	2.56023e+06	1.21074e+06	2.71274e+06	2.76421e+06	2.32339e+06	2.74992e+06	1.28675e+06	1.91506e+06	2.0677e+06	2.75802e+06
POTEKP	2.43761e+06	2.6769e+06	2.55972e+06	449482	3.78188e+06	535777	1.56305e+06	1.97395e+06	2.70177e+06	2.8294e+06	2.38417e+06	1.28098e+06	2.51654e+06	3.20895e+06	2.80595e+06	2.74362e+06	1.61231e+06	2.11697e+06	1.60045e+06	3.05772e+06
PPA1	877559	2628830	1860270	354344		1829291	933065	1.61876e+06	1.33254e+06			4338355	2.25135e+06	457830	3256237		63548	2595685		982704
PPBP	1.90311e+06	3.33082e+06	2.83616e+06	3.02187e+06	3.31333e+06	2.49386e+06	2.34277e+06	3.18657e+06	2.83501e+06	2.7722e+06	2.66009e+06	1.93536e+06	1.97939e+06	2.41357e+06	3.1503e+06	2.30108e+06	2.7683e+06	2.78128e+06	2.36679e+06	2.77238e+06
PPIA	2.6999e+06	2.23987e+06	276197770	507363	505403	1.04122e+06	211861	4.87638e+06		1.3041e+08	270016000		2.78006e+06	2.05779e+06	2.71215e+08	5.32042e+06	2.81287e+06	273094000	3.3252e+06	1.64665e+08
PPIB	18236040	7077300	17652675	3148640	7849130	7833020	6273365	20765650	4445985	9448300		4924810	5279115	25906710	6168930		17045650	25618180	7823200	8.24828e+06
PPIL3	29182600	16110495						16213200		991137					25128300				1.91779e+07
PPIP5K2	444246	517060	755421	451654	610970	729795		876289		604291	376113			531147	206584	580819	352536	693966
PPM1F	4.26675e+06	3.55299e+06	0	2989510	5264660	2857720	5228976	4.84882e+06	6.43882e+06	3.99453e+06	2.53421e+06	3417567	3565485	0	3804830	4.76773e+06	2.56857e+06	4859050	4822725	3849100
PPP1CA	1.35272e+06				123402	437779		286164	2685535		1.95523e+06		887742				6.82284e+06	2.36742e+06
PPP1CB	1.35272e+06				123402			286164	2685535	21179650	1.95523e+06		887742					2.36742e+06
PPP1CC	1.35272e+06				123402	437779		286164	2685535		1.95523e+06		887742				6.82284e+06	2.36742e+06
PPP1R10	9550650	16545900	16151500		20564200					20138600	13725100	14952500	9792000		1.28989e+07	22422900		1.28823e+07	9776400	10634500
PPP1R13L	172896															341252				223558
PPP1R7	22968400	874909	667065	20391815		0	20233174	38020400	989524	24636030	19685775	1.99171e+07		3.67225e+07	4.36629e+06	547973	3.42925e+07	20556950		632395
PPP1R9B	5298187	9282950	10846550	4.65701e+06	6037200	6.34591e+06	8685300	8.51507e+06	8.01624e+06	9.41514e+06	10114560	7.55488e+06	8.69353e+06	14491400	1.05357e+07	6.93987e+06	8.80547e+06	8.04274e+06	7.79992e+06	1.05366e+07
PPP2R1A	3175005	5.2038e+06				5565860	4246390			242659	736780	6119225			1.54561e+06
PPP2R1B	3175005	5.2038e+06					4246390					6119225
PPP2R2A	489393		3.41315e+07	258872	0	851255		1170452		704388	760586	58327.8	49114.7	662134	265117		220588
PPP5C	76337.2							32636115	750008			83867								82428.5
PPP6C	711427		1.13869e+06
PQBP1	3054090		3493816		5884035	3725985	3474095				3.54867e+06			4.17316e+06		4726760	6.8355e+06
PRB3	2783300	2327040	3345150	3185390	3.37542e+06	1.77229e+06	2425370	3322530	2355700	3736940	2537320	2204180	2915580	3852360	3608310	3319460	3.18374e+06	2784550	2920360	2.53703e+06
PRDX1	11288.4		144125	1.15919e+07	1.71613e+07		7655290		2.55908e+06	1.55099e+06	3148810	6.60876e+06	959784	603205	5.78083e+06	1.40487e+07			6.16141e+06	600352
PRDX2	3.95569e+06	3.72337e+06	6.81459e+06	3.00685e+08	7.22718e+06	9.3824e+06	5.55983e+06	1.10159e+07	1.14455e+07	3.05164e+08	9.96474e+06	6.58959e+06	7.34949e+06	1.69953e+08	9.76854e+06	1.16143e+07	6.27761e+06	8.71004e+06	9.26018e+06	2.0431e+08
PRDX6	3.95041e+06	6.07606e+06	3.88792e+07	6.14985e+06	4.0458e+06	2.89369e+06	1.45882e+06	2.39306e+06	2.0677e+06	3.37936e+06	8.55383e+06	3.354e+06	4.28288e+06	1.12862e+06	4.12372e+06	2.06725e+06	7.32677e+07	987634	1.03872e+06	4.49244e+06
PREPL	718934			0	1.3716e+06			1.24854e+06	1551200			956321	1.26455e+06	0		547145
PRG4	2.53702e+06	2.98925e+06	4.17471e+06	3.94463e+06	4.20733e+06	4.33354e+06	3.28531e+06	5.35633e+06	3.83567e+06	4.2337e+06	3.61361e+06	2.90636e+06	4.11147e+06	3.86806e+06	4.4235e+06	3.05212e+06	4.01748e+06	5.22772e+06	2.92836e+06	4.338e+06
PRH1	853816	705448	877032	1.30473e+06	946718	1169294	498280	659248	490131	910950	1039710	481611	911902	1163984	1115048	695135	963143	642340	711167	760566
PRKAB1	6.46613e+06	4.13647e+07	18812000	4336715	60280395	36392080	1.79524e+07	38789378	2.98748e+07	4.17615e+07	27150240	2.42761e+07	3.00942e+07	3.5967e+07	5.49426e+07	12143860	3.15022e+07	3.74785e+07	3.6751e+07	32953800
PRKDC	1.54343e+07	2.01435e+07	2.12447e+07	4.25637e+07	1.36886e+07	1.02297e+07	7645264	12685029	3.00046e+07	3.33408e+07	2.49365e+07	9.58525e+06	1.72406e+07	1.20108e+07	1.82202e+07	3.8949e+07	1.81577e+07	2.55721e+07	2.66997e+07	8.38444e+06
PRMT1	2.63729e+06		3.82168e+06	3.14771e+06			3360612						931757	72507.3	5000272				4.99538e+06
PROC	1.11681e+07	1.46535e+06	9.25148e+06	1.11487e+07	3.35403e+06	1.85849e+06	3.16732e+06	6.72913e+06	7.06586e+06	9.99564e+06	2.07082e+06	1.86191e+06	2.64987e+06	5.00814e+06	2.15082e+06	4.65919e+06	1.62666e+06	1.23536e+07	1.96339e+06	1.33921e+06
PROCR	135247	50010.7	119628	124238	91752.4	191755			77685.2	149501	91562		60467.7	55834	133379	119076	126473		184680	116106
PROS1	5.25961e+07	5.45601e+07	5.31846e+07	6.09003e+07	5.82558e+07	4.16734e+07	4.81637e+07	5.43956e+07	5.562e+07	6.0955e+07	5.84717e+07	5.98988e+07	4.53411e+07	5.93707e+07	5.81957e+07	4.57314e+07	6.02513e+07	5.45713e+07	5.19959e+07	5.85327e+07
PROZ	800682	8.25313e+06	4.22938e+06	6.52838e+06	3.38336e+06	5.21818e+06	3.93908e+06	2.6243e+06	4.72008e+06	6.31417e+06	5.13722e+06	3.06094e+06	5.56009e+06	5.64882e+06	3.71288e+06	6.53645e+06	3.07786e+06	3.18513e+06	2.89544e+06	5.2268e+06
PRPF8	1499575		4.75315e+06	4062190	3.09565e+06	53547		2750643	2.66021e+06	538942	1.88427e+06	1.74771e+06	3.71726e+06	1876625	1.38813e+06	3561949	69503	2.30036e+06
PRPH	3.20778e+06	2.98954e+07	122869	556066		19672670	2628060	3.8864e+06	3.23564e+06	647874		2.70762e+06	120501			809986		14619250	324242	390267
PRPS1	279580	4119799	432821		42220.2			135178	127472			355932		0	152890	342584	327466		216134	277522
PRPS2	279580	457769	432821		42220.2			135178	127472			355932		0	152890	342584	327466		216134	277522
PRSS1	2.4182e+07	1.87986e+07	2.3213e+07	2.15206e+07	2.17932e+07	1.63181e+07	2.18596e+07	3.24059e+07	2.5729e+07	2.80883e+07	1.54077e+07	1.46458e+07	1.85148e+07	2.08185e+07	2.20516e+07	2.2279e+07	2.15908e+07	2.41016e+07	2.39096e+07	1.87561e+07
PRSS2	1.96445e+07	1.87986e+07	2.28947e+07	2.19863e+07	1.7827e+07	1.63181e+07	1.76178e+07	2.32876e+07	2.16077e+07	2.30765e+07	1.54077e+07	1.44326e+07	1.84559e+07	2.08185e+07	1.83987e+07	2.2279e+07	2.15908e+07	2.00521e+07	2.00226e+07	1.87561e+07
PRSS3	4.53318e+07	6.62764e+07	9.12833e+07	6.87436e+07	6.50614e+07	5.58711e+07	6.74844e+07	5.846e+07	8.57886e+07	7.2065e+07	6.01813e+07	5.12478e+07	5.78662e+07	9.32172e+07	5.71012e+07	7.27249e+07	8.28339e+07	8.55837e+07	6.03748e+07	7.47654e+07
PRSS3P2	1.75742e+07	1.87986e+07	2.28947e+07	2.19863e+07	1.7827e+07	1.63181e+07	1.76178e+07	2.32876e+07	2.16077e+07	2.24717e+07	1.54077e+07	1.44326e+07	1.84559e+07	2.08185e+07	1.83987e+07	2.2279e+07	2.15908e+07	2.00521e+07	2.00226e+07	1.87561e+07
PSAP	266521
PSIP1	4826760	4561425	1.86395e+06		4.03024e+06	4281325	4116910	1.38081e+06	1.57473e+06	2246150	3759910	5435960	4.67887e+06	1124600	1.74944e+06	3.32942e+06		1727085	5.92292e+06
PSMA4	12025650	36525000	19492150			1.07656e+06		230524	776630	37262900	1.7054e+06	169219	0		838620	20388572		18172850	58015.7	32161860
PSMA6	1.62962e+08			1.13361e+08						131761		1591945					2.14772e+06		105423000
PSMA7	1183105	14156555	1.16709e+06	699117		83573			992580			891275		779208			577734	962415	6082225
PSMA8	1183105	14156555	1.16709e+06	699117					992580			891275		779208			462841	962415	6082225
PSMB1	2599590	6857020	9992701	3.08328e+06	7183714	5018226	6.16465e+06	10169059	4.93203e+06	9.77727e+06	3.82393e+06	8887873	6241456	3697180	4.64398e+06	8.29959e+06	5898822	7.30173e+06	8.2815e+06	7.58469e+06
PSMB4	919786	9079650	18342700	10305300	9.88415e+06			16778675		1248079			1.49094e+06	1.75919e+07				2.10154e+07		3525955
PSMB8	375404		609386			834402	556151	587481			645236	1.20173e+06	169723	275532	433727	347243	603760			898887
PSMC5	2085056	1482840	1.51059e+06		2.32155e+06		736100		1.78872e+06	2.29474e+06	1.69425e+06	2180960	1.75688e+06		2.68488e+06	1.73582e+06	1442144	2.00849e+06	2.12879e+06	1.83491e+06
PSMD2	0	32654050	2.50026e+07	5.08916e+07	42471300		590486	18241807		3.71583e+07	182432		52282750	39367540		1239555		43836200	45178465	4.7485e+06
PSMD8	1.92001e+06	3.44164e+06	3.51161e+06	4.84499e+06	4.52376e+06	3841386	2.98241e+06	3.69904e+06	4224900	1.16224e+07	1.10806e+07	2.11948e+06	15634520	4.05094e+06	6.67248e+06	2.6164e+06	5.35644e+06	4382598	1.0517e+07	3.89806e+06
PSME1	9171340	12318250	12685750	2314502	140057006	5.85822e+06		184729200	456176	10078400	17690465	4.6463e+06	3.60348e+07	6.89725e+06	1.37448e+07	1.16939e+07	12060900	9998615	2.22533e+07	1.13636e+07
PSME2	0	1.85989e+07	3.58178e+07	1924435	355193	2.46643e+06	1.80573e+07		2.26128e+06	2.57627e+06	1720715	1.57644e+06	4.16679e+06		24023900	27474155	2185910	3.32599e+07	2.58233e+07	3.2128e+06
PSME3	4.91406e+06	6.02436e+06	5931595	5585240	1234565		7.87895e+06	5.88652e+06	6.55833e+06	8017940	4443180	6009480	7615394	7.4807e+06	4.96789e+06	4922480	6149192	6582785	5.61387e+06	2502595
PTBP3	2255970	3973425	3.87552e+06	3.19568e+06	1041495	4138035	3713300	3.52743e+06	0	2.54563e+06	2.69083e+06	3.70643e+06		4383789	2023080	4091295	4.3317e+06	1.68946e+06	2.65067e+06	3.21885e+06
PTER	4.77717e+06		6411480	5774015	4.7841e+06		2134780	4649910		6135350	2.89873e+06			5668205	1023995	0	6240890		4489540
PTGDS	408171	569457	676956	743568	629164	241635	2.21622e+07	229821	946602	3.26129e+06	1.39985e+06	177022	353706		487309		267211		1629320	265332
PTPN1	3456400	8.22703e+06	13474600		8389500	6977300	17606650					9715350	299129	6389160		0	9.75168e+06	8.78397e+06	0
PTPN6	512125	2.44503e+06		3022040	2968430		2.99809e+06	1735818				2631218					1.32963e+06			2.56162e+06
PTPRA	35118800	6.60876e+07	67118000	54262550	4.53261e+07	19531200	31938000	4.15253e+07	5.99088e+07	32918900	3.54472e+07	2.25432e+07	60512925	42496400	0	5.95478e+07	64345400		44723700	5.19615e+07
PTPRD	1673677	1005470		839266	197183		961217	384725		412915	1065255			1.02059e+06		433945				1804990
PTPRF	8.61374e+06	1.74305e+07	1.15784e+06	1.82793e+06	197183		2.57181e+07	2.05108e+06	17961574	9.56725e+06	2.18323e+07	3.07031e+07	1.0205e+06	2.05954e+07	37884400	1.5993e+06	2.46329e+07		1.67562e+07	3.50261e+07
PTPRG	554477	909777	396356	117172	1.0738e+06	114400	104930	494520	874919	495359	534409	84283.6	427123	5.7665e+06	4.48828e+06	332767	182503	3.05834e+06	4.1282e+06	7.51745e+06
PTPRJ	6151300		13158150	14441550	1537960	17454600					9748510		152404				4747285
PTPRS	8984800	150172	17954485		0	23578550	51878.3	404513		18251250	17342200	77244.5	20526100	20735050	26671325			2.02871e+07
PTPRZ1	116018			130200	135057					44811.8		431094				1583275
PUF60	8.0438e+06			4.01086e+06		7385040					5.22915e+06	7743905			5445430		223263
PYCR2	9857095	5209450	4.80859e+06	11084900	9467880	5104400	6027280	28440150	7385270	1.06462e+07	5292750	5255864	1.02397e+07	9581450	10166000	2031440	10130095	7403540	7.54584e+06	8449610
PYGB	332527				541887	401128	86431.4			376421	416407	462241	2.7114e+06	478264	242297	1.33942e+06		2.17329e+06		643680
PYGL	332527				541887	919478				376421	416407	462241	1.53211e+06	478264	242297	429996		1.38321e+06		373911
PYGM	332527				541887	401128				376421	416407	462241	567497	478264	242297	727376		269077		373911
PZP	2.48868e+08	2.69129e+08	3.10246e+08	3.03491e+08	2.98738e+08	2.32141e+08	2.69532e+08	2.90282e+08	3.25496e+08	3.20714e+08	2.71241e+08	2.58877e+08	2.80427e+08	2.73067e+08	2.96452e+08	2.52772e+08	2.94785e+08	2.92439e+08	2.45532e+08	2.72782e+08
QSOX1	1.211e+08	2.18107e+08	1.07984e+07	2.33677e+08	2.28419e+08	2.53234e+08	2.97807e+07	1.9491e+08	1.18858e+08	2.21328e+08	2.84833e+08	2.2932e+08	2.40594e+08	1.78427e+08	7.88747e+06	2.73463e+08	1.12987e+08	1.46269e+08	9.07702e+06	2.49684e+07
QSOX2	24050.6				182329							239756					227008	222469		159465
RAB10	2.88084e+07	37442.5	35485550	6.69535e+07	143510	41998600	66613750	67554000	65198300		9232349	57027900	4.20602e+07	81347000	76193000		66220400		33241400	68392100
RAB11A	2.48442e+06	7.99677e+06	6090175	6.1004e+06	2204640	3884894	3.76029e+06	3.30009e+06	6.92067e+06	5.31728e+06	3.2814e+06	4.35705e+06	7.34229e+06	1.80674e+06	8.94416e+06	1.87065e+06	5.84596e+06	5.03352e+06	6.90823e+06	1.16049e+06
RAB11B	2.48442e+06	1.00531e+07	6090175	6.1004e+06	2204640	3884894	3.76029e+06	3.30009e+06	6.92067e+06	5.31728e+06	3.2814e+06	4.35705e+06	7.34229e+06	1.80674e+06	8.94416e+06	1.87065e+06	5.84596e+06	5.03352e+06	6.90823e+06	1.16049e+06
RAB18	914433							878925		1.11411e+06		725376					403886		657517	441421
RAB25	260144		323062	291690	457641	364945					488980				377395
RAB2A	4.4737e+06					3798610					68026					2.77559e+06			3952955
RAB2B	4.4737e+06					3798610					68026					2.77559e+06			3952955
RAB32	973442	1.12411e+06	4056870	2.28981e+06		3.73366e+06	1.55792e+06		4370540	3.0128e+06					3142055	3.16955e+06		0
RAB6A	0			364271	4668.88	182825	2186.78			305996										365715
RAB6B	0			364271	4668.88		2186.78			305996							403125			365715
RAB7A	1.81383e+06	3982940						1.92859e+06							16528700		2.95938e+06	1.09512e+07	10072725	1.71994e+06
RABEP1	2.72858e+06	4.3187e+06	4023642	4497990		3.52236e+06	5.02883e+06	7120130	4.30871e+06	5175042	6.27006e+06	5.2552e+06	6023600	3425815	3.4688e+06	4.80062e+06	3.92963e+06	4.72271e+06	2157254	4.59609e+06
RACK1	9.55031e+06	1.17382e+07	2.50681e+07	2.03969e+07	1.53493e+07	1.04914e+07	8.95466e+06	1.53968e+07	2.02345e+07	1.38192e+07	1.15522e+07	2.35733e+07	1.53216e+07	1.04777e+07	1.02986e+07	1.35353e+07	1.37782e+07	1.04284e+07	9.13132e+06	9.58913e+06
RAD23B	4818186	7308400	0	1.54498e+07	9560795	5510615	3.46851e+06	9.38122e+06		1.29964e+07	7693850			3914745	3.45437e+06	2.81176e+06	1.75847e+07	237248	1.77617e+07	354517
RALGAPA2	3.81435e+07	35995050	6.4471e+07	68703600	4.55654e+07	6.2593e+07	7.68925e+07	72574002	7.32371e+07	9.99328e+07	7.1074e+07	7.14326e+07	64351600	7.7563e+07	7.88336e+07	71875900	7.55663e+07	6.67678e+07	66144600	73013475
RANBP2	2.38855e+06	8923.79	2.20822e+06				3986240	40061.3		90016.5			1525935				45105.5	24501.2		3.97131e+06
RANBP9	66262650			33813350	4.70699e+07						60562100		46015850		44124850			33902650		3.27358e+07
RAP1A	1.87543e+06	193532	4.7221e+06	6.98085e+06	136850	65331.7	1.50371e+06	4.31321e+06	3.81434e+06	5.56455e+06	59013.5	36866.8	3.85181e+06	4.65733e+06	7.28011e+06	6.67726e+06	5.21796e+06	6.68349e+06	3.57762e+06	24989.4
RAP1B	1.94457e+06	193532	4.7221e+06	6.98085e+06	136850	65331.7	1.50371e+06	4.31321e+06	3.81434e+06	5.71313e+06	59013.5	36866.8	3.85181e+06	4.65733e+06	7.28011e+06	6.67726e+06	5.21796e+06	6.6453e+06	3.57762e+06	24989.4
RARS1	1.46273e+06	364996	211671	457278	556210		778794	1.49437e+07		542154	529989	1.55676e+06	736356	1.13913e+06	1.07664e+06	1242602	2.1357e+06	662754	757063	980843
RASA1	345240	1.82613e+06		1603230		8.82945e+06			9338650	17034050		9.38321e+06		11869500		5992000	1.10727e+07	15651800		2989950
RASA4	0	4.22603e+07	40243225	22237525	16243150		22442225	22745025	23741875	3.02554e+07	44427525	31251770	33905550		45613250	3.55311e+07	27487800		2.56837e+07
RASA4B	0	4.22603e+07	40243225	22237525	16243150		22442225	22745025	23741875	3.02554e+07	44427525	31251770	33905550		45613250	3.55311e+07	27487800		2.56837e+07
RAVER1	2407640	1233500								1416065		2461850					1.13782e+06			704177
RBBP4	172707			602227			278495
RBBP7	172707			602227			278495
RBCK1	19119900	51159300	43627650	27105500	2.75203e+07	23677500	1.09293e+07	42774450	3.70889e+07	43620900	50095050	36093700	38765900	47424950	4.43326e+07	45104500	22723900	32869600	40178800	20890500
RBMX	345482				799413	370087	259773		272905	324715			416314	333061	211624	238372	713067
RBMXL1	127886				454337	370087
RBP4	2.60084e+07	3.31193e+07	3.91651e+07	3.36005e+07	3.4152e+07	3.69875e+07	3.59424e+07	4.15752e+07	3.80518e+07	3.42655e+07	3.65811e+07	3.74792e+07	3.256e+07	3.7788e+07	3.1785e+07	3.51333e+07	3.63287e+07	3.97593e+07	3.1653e+07	3.74817e+07
RCC1L	1673892				371727		1.62989e+06	1.12002e+06	1.15061e+06	0		1601505	1.14993e+06	877424	1.51982e+06		1.04098e+06	1486205		982553
RCN1	3960728	3700470	6.34247e+06	6.05363e+06	4.54076e+06	8.01399e+06	7500600	7.63263e+06	5.73868e+06	3.3535e+06	7394350	5091612	3.67703e+06	5378375	5.07031e+06	4.97862e+06	4425802	4.94941e+06	4.9204e+06	5.54812e+06
RDX	4.69788e+07	3.4646e+07	6.91747e+07	6.11353e+07	2.90071e+07	7.6933e+07	4.4324e+07	3.35282e+07	5.45588e+07	4.01433e+07	6.67941e+07	6.43368e+07	3.9307e+07	4.63762e+07	6.55074e+07	6.20498e+07	55234800	3.29611e+07	3.36021e+07	7.4367e+07
RECK	338952	393144	514449	352442	765701		766295		449108		588184		879083	575942	799425	608684	672764		604886	447158
REG1A	3157750	3996850	8944900	7900800	3.66306e+06	3.56607e+06	7313650	5.59977e+06	2.2892e+06	3.86373e+06	4.50383e+06	4499694	6638600	3.76916e+06	4.08798e+06	3423678	4042980	5.91169e+06	4.47503e+06	3.25996e+06
REG1B	3157750	3996850	8944900	7900800	3.66306e+06	3.56607e+06	7313650	5.59977e+06	2.2892e+06	3.86373e+06	4.50383e+06	4499694	6638600	3.76916e+06	4.08798e+06	3423678	4042980	5.91169e+06	4.47503e+06	3.25996e+06
RELA	2.41166e+06	2.95916e+06	3.26698e+06	1154758		3543880	2.26379e+06	2.88027e+06	2890075	2.81173e+06	3517895	2.30622e+06		1872399	2317157	2950210	2261118	2.86152e+06	2103650
RGPD1	25366.9	8923.79	8213.79					40061.3		53836.2							45105.5	24501.2		20703.4
RGPD2	25366.9	8923.79	8213.79					40061.3		53836.2							45105.5	24501.2		20703.4
RGPD3	25366.9	8923.79	8213.79					40061.3		53836.2							45105.5	24501.2		20703.4
RGPD4	25366.9	8923.79	8213.79		588699			40061.3		53836.2			543422				45105.5	24501.2		20703.4
RGPD5	25366.9	8923.79	8213.79		588699			40061.3		53836.2			543422				45105.5	24501.2		20703.4
RGPD8	25366.9	8923.79	8213.79		588699			40061.3		53836.2			543422				45105.5	24501.2		20703.4
RGS3	116402
RIN1	1909000		3520880		1311730			2643250	1490440				2803670					1195675
RIOX2	3.0073e+07	45350125	6.39885e+07	3.86124e+07	2.0612e+07	5.67912e+07	35662700		62871000	60198850	28941450	29871025	3.40188e+07	40379500	32217850	52706800	5.74571e+07	42856000	3.6086e+07	29280125
RMC1	27570530	3.39183e+07	3.28181e+07	3.90616e+07	2.98019e+07	2.11671e+07	35397372	4.76021e+07	3.266e+07	3.38991e+07	2.69871e+07	3.86472e+07	3.27058e+07	3.31428e+07	3.32767e+07	2.49328e+07	33088100	3.46579e+07	25245400	2.31559e+07
RNF20	745150					1.3163e+06	10950300						54494.8			870340
RNF40	889594	1.1716e+06	1.38194e+06	893970	954607	1.24553e+06	8386335		912577	1587908	1857500	1.12125e+06	54494.8		54522380	784919	1512622	1.10411e+06	1734190	15493100
RNH1	1.44244e+07	41575475	885502		22946905			2.99109e+07	1.7429e+07			2.71143e+07	6118315		4076545	486700
RNPEP	2.91404e+07	1.85897e+07	7.91279e+06	6.43132e+06	3.22583e+07	6.69284e+06	6.47913e+06	2.75904e+07	7.11513e+06	6.77943e+06	4.00592e+07	6.00955e+06	3.96595e+07	7.69902e+06	7.94849e+06	5.8655e+06	1.85562e+07	5.90064e+06	3.49873e+07	9.01031e+06
RO60	3201530	6.98568e+06	9.49766e+06	2.74509e+06	4.76123e+06	3400656		5.9252e+06	4.4964e+06	5.41479e+06		1.84976e+06	2.60663e+06	1.36742e+07	2.08776e+06	4.07693e+06	1.48991e+06	4.11947e+06	1.19226e+06	4.84626e+06
ROBO4	2416000	1958680	0							4622160	1564785	8386010								2799275
RPA1	5321180	1.94361e+06		710125			1.2519e+06		2553790	3011735		4.75439e+06	4.38523e+06	3342120					7411270	2.17674e+06
RPIA	4302040	11059860	34960485	16266360	9585980	6040200	5963000	8932310	9479260	2.94506e+07	8189070	5.28268e+06	20688865		7.17621e+06	2869860	8.75766e+06	7801370	11298200	4001655
RPL13	1381360	2.27813e+06	1.49806e+06	3.76938e+06				1.48787e+06	899367	1.81144e+06	2118630	2.37869e+06	2.75271e+06	1.92975e+06	1450460		2.50411e+06	2249835	2.17111e+06
RPL26	2.15815e+06			3.11222e+06	4935100		2795345	2.90469e+06		3743805		2.16307e+06	2347344	3956035		2.02085e+06	3.14502e+06	3.82221e+06	3998935	237978
RPL26L1	2.15815e+06			3.11222e+06	4935100		2795345	2.90469e+06		3743805		2.16307e+06	2347344	3956035		2.02085e+06	3.14502e+06	3.82221e+06	3998935	237978
RPL3	1.72253e+06			2.98316e+06			72430.5				5740540					5986375		5868850		5583220
RPL35A	58619200	59452550		51804700	4.91045e+07	37505675			3.37127e+07		3.47421e+07	31502800	52390800	29872550	7.62829e+07		49678650		3.57116e+07	71212750
RPL5	4567140	1.34718e+06	701250	595150		1.30698e+06	645969	1104900	903610	576830		278606		1315605	1.24653e+06	921422		1.0605e+06	311754	782051
RPLP0	13321950		15573075							14160200			1.27045e+07	790723	832325	8185125		1.75073e+06
RPLP0P6	13321950		15573075							14160200			1.27045e+07	790723	832325	8185125		1.75073e+06
RPLP2	7316586	12096200		8141470	1.03901e+07	4.18047e+06	10995350	12130100		6257450	9650440	10905200		0	13167200	9.50823e+06	7.21579e+06	12839275	8.65444e+06	7.75664e+06
RPRD2	4773432									3.43809e+06						3.28449e+06		1151750		0
RPS16	40455740	40802600		26912300	3.35107e+07	2.95261e+07	2.35401e+07	3.22478e+07		29476920	3.31391e+07	3.09777e+07	3.16462e+07	3.14069e+07	32402340	32189875	3.74549e+07		46064950	3.9833e+07
RPS23	37499865	37967116	3.56633e+07	5.01707e+07	4.3785e+07	41986825	5.2107e+07	51087490	3.38182e+07	4.49469e+07	3.74418e+07	3.79349e+07	3.50284e+07	4.15769e+07	5.16762e+07	3.92832e+07	52515640	4.22785e+07	3.8546e+07	4.34063e+07
RPS27A	3.75709e+06	2.11177e+07	3.26173e+06	1.41971e+07	1.74321e+07	2.58085e+07	5.06739e+06	1.47857e+07	1.99961e+07	1.70147e+07	2.23525e+07	1.41053e+07	3.89934e+06	5.09779e+06	5.50071e+06	1.48701e+07	4.28238e+06	2.26762e+07	4.68985e+06	3.90787e+06
RPS28	1381730
RPS3	1987395	3023415		110551000	1157410			1.07176e+06	1.67214e+08		152932000	4.19517e+06			1.10677e+07		1.90263e+06	3.05471e+06	2.35213e+07
RPS4X	4.94598e+06	3639285	3.50779e+06		5565825	3453420	2.89149e+06	3.35151e+06	5551178	7.51029e+06	5829360	9.0569e+06	5.00275e+06	2.4541e+06	3917920	4.23971e+06	3899265	2.37457e+06	4.03525e+06	3406885
RPS6	424034	364011	680766	317446	572448	228259		447037	531344				493055	528881	443654	394755		395137	1.24874e+06
RPSA	386520	5.74766e+07	4.68531e+06	2304240	1811368			589371	94962.5						218332		2444944			4524080
RPTOR	240789	500864	184581	232028		0	184698	538373	299228		467239	106598				234732	386422	684539		318694
RTN4	21694920	2.00922e+07	2.0241e+07	2.11711e+07	17064800	38011050	28490650	3.18561e+07	1.79519e+07	2.93649e+07	3.1353e+07	1.87378e+07	1.76108e+07	4.05585e+07	32926860	14887850	3.46869e+07	2.78612e+07	19751687	1.57723e+07
RTN4RL2	8249360	7990500	5135050	9702345		9691470	8153450	9738210	9439460	10360700	9064620	3.64213e+06	8542030	10323275	4963600	9691490	6453530	10679200	9800410	9915550
RTRAF	66373.9	294342		263864	56213.3					42393.1		331278	162208		803326				403108
RUVBL1	1067710	3.63661e+06		1562130	0				2287185											34688.7
RUVBL2	8.59252e+07	216769	49511250	63281770	8.26187e+07				29156200	6.47625e+07		2883210		56683500	52250800	4.92218e+07	407770	0	73183100	3.72333e+07
RXRA	1.41091e+06	1.79036e+06	830367		714351	1.47272e+06	1.25923e+06	1.42404e+06	3.45334e+06	1.54926e+06	1.21381e+06	1.66163e+06	1.21516e+06		1.19583e+06	1.13917e+06		1.27459e+06	1.17116e+06	1.16223e+06
RXRB	1.41091e+06	1.79036e+06	830367		714351	1.47272e+06	1.25923e+06	1.42404e+06	3.45334e+06	1.54926e+06	1.21381e+06	1.66163e+06	1.21516e+06		1.19583e+06	1.13917e+06		1.27459e+06	1.17116e+06	1.16223e+06
RXRG	1.41091e+06	1.79036e+06	830367		714351	1.47272e+06	1.25923e+06	1.42404e+06	3.45334e+06	1.54926e+06	1.21381e+06	1.66163e+06	1.21516e+06		1.19583e+06	1.13917e+06		1.27459e+06	1.17116e+06	1.16223e+06
S100A8	65163725	91727000		67150275	53191885		0	88756200	99361950	104855690	7.31256e+07	0		105614150	5.4094e+07	0	86252698	2.39633e+06	43313600	49995850
S100A9	6815685	2.74188e+06	4.84902e+06	1.6493e+06	199763	7.28072e+06	56289.6	1.47068e+07	582055	458023	5.71833e+06	422536	103150	692214	4013650		528503	1.28679e+06	1.84361e+06	180478
SAA1	1.56801e+07	4.23849e+06	2.45589e+07	2.25145e+07	2.45303e+07	1.67018e+07	2.96393e+06	2.79148e+07	1.0714e+07	2.10885e+07	2.57909e+07	2.13394e+07	3.8753e+06	2.99077e+07	4.39826e+06	2.14442e+07	2.31509e+07	2.88353e+07	7.08601e+06	4.90963e+06
SAA2	1.45678e+07	2.79764e+06	2.27603e+07	2.21606e+07	2.19127e+07	1.49439e+07	2.51435e+06	2.76643e+07	8.88976e+06	1.93419e+07	2.20691e+07	2.01304e+07	2.51119e+06	2.78775e+07	3.11964e+06	1.90696e+07	2.17019e+07	2.6544e+07	6.58653e+06	2.98335e+06
SAA4	1.30498e+08	1.30858e+08	9.05508e+07	9.65644e+07	1.52186e+08	7.97572e+07	5.75999e+07	1.11453e+08	8.96108e+07	1.50654e+08	1.45665e+08	1.19741e+08	9.50653e+07	1.63928e+08	1.27887e+08	8.11424e+07	9.18881e+07	1.06446e+08	1.26295e+08	1.36116e+08
SAMM50	600420																	718261
SARM1	5.24584e+06	4579585		3.98727e+06		4.68521e+06	3.26803e+06	5.30258e+06	4109034		2.47057e+06	4.26512e+06	2576200	5.07034e+06	4023210	4818240	2.80082e+06	4.40726e+06	3.12482e+06	4.71356e+06
SART3	4182410	12507875	7.83585e+06	13250510	13073900	1.79926e+07			3.75561e+06	9306842	1.12155e+07	1974900	2.15297e+06	4625880	1842505	10298790	9131300		9.8332e+06
SBSN	18822672	1.97456e+07	2.54707e+07	2.80661e+07	25103891	2.29434e+07	2.12912e+07	2.98684e+07	2.8684e+07	2.57105e+07	2.43969e+07	1.98249e+07	2.37331e+07	23665127	2.86792e+07	2.30461e+07	2.42331e+07	2.08441e+07	2.35625e+07	2.75201e+07
SCARB2	2.7918e+06	5.83957e+06	6.2744e+06	6922465	5.64466e+06	3.00777e+06	6.88597e+06	6.14428e+06	5.03946e+06	3.24195e+06	54883	2.72312e+06		4.0096e+06	4.11113e+06	3.54877e+06			6704005	3.75586e+06
SCFD1	1235030			2135310			1824900		1.45153e+06	5.66923e+06	2531900		7514042	7608750	2515215
SCIN	431270	218616	1.84112e+06	388246	235400	115418	57901.3	322726	3.00669e+06	8.81573e+06	876749	329641	386095	299973	241599	376289	281084	278417	217806	1.28861e+06
SCLY	940384
SCRIB	1.2412e+07	9140224	12935635	13183700		6914940		1.05507e+07	1.16221e+07	8052875	9.33986e+06	1.09965e+07	1.08335e+07	4.97273e+06	8.90773e+06	9.00603e+06	7457190	1.14061e+07	1.8235e+07	8.44953e+06
SCRN1	6.77439e+06	1.56879e+07	1.45412e+07	190809	1.60592e+07	196147	9.30826e+06	1.29117e+07	179119	134566	1.00449e+07	1.65972e+07	1.64445e+07	171650	1.37282e+07	1.38928e+07	8.46341e+06	1.13914e+07	161887	103129
SCYL1	644160
SDCBP	2641890	1322260		3933570		2.7154e+06	3762205	1.45938e+06		2.08499e+06	3.57613e+06		3.53871e+06	895923	3434290		3442290			5077131
SDCBP2	41478.3
SEC16A	1590030			2736870	3754405	3.5234e+06		3326365	4261110		2727690	3471990		2630330	4967280				126510
SEC22B	638455			291905			260623	4.70039e+07		4167761				3.68571e+07
SEC63	435093	162502																	510640
SEH1L	823044		116060	2974975				59555	1.80056e+06					237260	2.44282e+06		2.88649e+06		2593547
SEL1L	1834000				0								9851250
SELENBP1	3.24501e+07	5.93765e+07	3.67567e+07	1.40314e+08	5.10439e+07	3.49687e+07	3.92497e+07	5.11421e+07	3.7927e+07	8.17005e+07	4.93217e+07	3.24492e+07	5.61642e+07	5.35346e+07	4.79968e+07	4.37015e+07	2.81528e+07	9.45922e+07	5.71386e+07	5.10455e+07
SELENOI	7.6393e+06	9.34503e+06	10611180	17808600	9.22879e+06	5650808	1.22796e+07	1.00606e+07	8967725	1.31558e+07	7.29192e+06		6505674	8415100	9.38833e+06	5017565	1.1694e+07	10227000	6772840	5886510
SELENOP	1.05451e+07	1.42436e+07	1.88478e+07	1.46767e+07	1.55324e+07	1.33686e+07	1.27485e+07	1.8917e+07	1.46491e+07	1.8615e+07	1.50668e+07	1.50264e+07	1.15042e+07	1.44897e+07	1.43107e+07	1.36323e+07	1.42926e+07	1.47802e+07	1.66507e+07	1.44231e+07
SELL	1223100	2.21415e+06	1.2026e+06	1.34864e+06	1.19986e+06	1.94251e+06	2.06722e+06	1566090	1.32425e+06	1.18176e+07	1.49395e+06	1.56157e+06	1.28195e+06	1349860	1872290	1.20936e+06	1.22761e+06	1.22242e+06	2.11329e+06	1358550
SEMG2	5.98578e+06	1.09649e+07	7394432	7979025	7.46336e+06	1.96027e+06	8.80907e+06	7.25739e+06	7.57688e+06	1.41295e+07	1.47804e+07	5960510	8769370	1.0113e+07	7832421	6.46245e+06	6.52803e+06	7.42351e+06	6.04211e+06	10133200
SEPHS2	5.00797e+07		17685700				135938500		164447500						72457000	178541500
SEPTIN11	1.06301e+07				10744450								17172100			1.45124e+07			15957375	1.03114e+07
SEPTIN2	332585	28955687	397897			950745	8.98975e+06		988492	1.69287e+06	1.94574e+07	276547		735890	404762				415317	1.54047e+07
SEPTIN7	3681863	3.36924e+06	5.74912e+06	3.40683e+06	7.88352e+06	3.24752e+06	5.84083e+06	2.42823e+06	3.69809e+06	1.77766e+06	10349702	1964060	3.87698e+06	2906928	4.69396e+06	5.91509e+06	4.14578e+06	3039639	5.07778e+06	3426895
SERPINA1	2.58339e+09	2.78402e+09	2.79246e+09	2.80358e+09	2.90633e+09	2.6788e+09	2.76792e+09	2.78016e+09	2.68722e+09	3.30546e+09	2.80702e+09	2.44123e+09	3.06717e+09	3.07372e+09	2.92048e+09	2.84271e+09	2.82101e+09	2.89462e+09	2.65193e+09	2.59972e+09
SERPINA10	1.0923e+07	1.45929e+07	1.59737e+07	1.35966e+07	1.13359e+07	1.34721e+07	8.36656e+06	2.75372e+07	1.69298e+07	1.81941e+07	2.89434e+07	8.72225e+06	3.28387e+07	3.30338e+07	1.297e+07	1.21572e+07	1.32138e+07	2.23182e+07	1.34435e+07	1.51944e+07
SERPINA2	2.56633e+06	2.72439e+06	2.82013e+06	3.16027e+06	3.2124e+06	2.97981e+06	2.33198e+06	3.16926e+06	3.06082e+06	3115446	2.77202e+06	2.22609e+06	2.97021e+06	3.11922e+06	3.03976e+06	2.98985e+06	2.94852e+06	2.95859e+06	2.74274e+06	2.91107e+06
SERPINA3	6.29258e+08	9.32888e+08	7.81878e+08	8.46371e+08	6.72742e+08	4.95088e+08	5.7886e+08	8.88147e+08	5.61994e+08	7.75485e+08	6.1073e+08	6.95048e+08	1.06191e+09	1.07426e+09	7.18535e+08	4.84183e+08	7.55743e+08	9.03157e+08	9.73363e+08	7.12869e+08
SERPINA4	3.5823e+07	4.90764e+07	4.07158e+07	4.36521e+07	4.99537e+07	3.69982e+07	3.50701e+07	3.89591e+07	3.88942e+07	4.61474e+07	3.8833e+07	3.67322e+07	4.34028e+07	4.81815e+07	4.45473e+07	3.89154e+07	4.27605e+07	3.9709e+07	4.93291e+07	3.97666e+07
SERPINA5	1.43389e+07	1.67852e+07	2.15584e+07	3.30122e+07	1.93851e+07	1.9888e+07	1.47719e+07	1.77076e+07	1.80628e+07	2.11019e+07	1.9875e+07	1.40624e+07	3.46544e+07	1.58898e+07	2.85378e+07	1.84559e+07	1.72285e+07	2.38619e+07	2.89656e+07	1.94896e+07
SERPINA6	5.17359e+07	5.18721e+07	7.41467e+07	5.44172e+07	6.37937e+07	5.3595e+07	4.79799e+07	5.56554e+07	6.5894e+07	6.34842e+07	5.03598e+07	4.64519e+07	5.18433e+07	5.22049e+07	5.58299e+07	3.60843e+07	5.49127e+07	6.97389e+07	5.13268e+07	5.1339e+07
SERPINA7	2.02383e+07	1.69428e+07	2.99693e+07	1.76498e+07	2.45923e+07	2.68127e+07	2.55841e+07	2.18917e+07	2.72201e+07	2.67453e+07	1.91342e+07	1.99611e+07	2.28899e+07	2.23851e+07	2.77164e+07	1.86786e+07	2.12719e+07	3.06143e+07	3.39976e+07	2.0015e+07
SERPINB10	355942	1.02634e+06					8.50333e+06		6833850	26040.2	1590570		561042	520760	598930		8956590		73451.5
SERPINB12	8.27025e+06	11849200	1.28403e+07	18392900	14494050	16987000	9.78407e+06	15095440	12693480	16488700	4.91643e+06	11974250	15904200	15539150	18006600	1.1341e+07	16558000	9117450	16847400	8587100
SERPINB13	6748160		5.46194e+06	5700866				2105520					5224315					3469175	4.49532e+06	4.48492e+06
SERPINB3	6132680	5.01294e+06	18922390	213391				4.42458e+06	2.42106e+06	7560944	6.78369e+06		6.93256e+06	1.67605e+07	1946430		3.86539e+06	4.84796e+06	4.85506e+06	311795
SERPINB6	5667362	7.7795e+06	20832150	1.22023e+06	3.80703e+07	3.26446e+07	3.18343e+07	2.33605e+07	1.081e+07	2.84827e+07	4.47472e+07	2.00026e+07	2.63256e+07	1.58238e+06	1.85008e+07	3.06231e+07	42921186	29007162	3.57109e+07	2.03782e+07
SERPINB9	2104060	331566	194080		58141	4353540	210488		125950		4676140			142012	105813	325826		5887460	9467405	293336
SERPINC1	3.48984e+08	3.90212e+08	3.70549e+08	4.20631e+08	4.04309e+08	3.8837e+08	3.79101e+08	3.80304e+08	4.09704e+08	4.28391e+08	3.55009e+08	3.66463e+08	4.15133e+08	4.37349e+08	4.42571e+08	3.82812e+08	3.73627e+08	3.53722e+08	3.17799e+08	4.16759e+08
SERPIND1	1.79788e+08	7.50868e+08	5.95263e+08	6.57881e+08	6.10831e+08	2.95911e+08	8.3364e+08	1.6048e+08	4.9446e+08	1.88503e+08	2.71979e+08	1.2394e+08	3.31349e+08	1.92592e+08	6.06947e+08	3.47404e+08	2.1994e+08	2.11382e+08	7.67126e+08	3.28324e+08
SERPINE1	5313225	8415525	9808580	9276665	8488500	7891310	7337510	6.72679e+06	8.16305e+06	272255	8.37347e+06	6.62998e+06	8.26672e+06				8.49469e+06		5481310	7018180
SERPINF1	5.29238e+07	6.47576e+07	6.89652e+07	6.78757e+07	6.53318e+07	5.94488e+07	7.0141e+07	7.26491e+07	6.27673e+07	5.95659e+07	6.20659e+07	6.05172e+07	6.45196e+07	6.45835e+07	7.31042e+07	5.75688e+07	5.99703e+07	7.34416e+07	6.89652e+07	5.70039e+07
SERPINF2	1.07105e+08	1.30522e+08	1.23192e+08	1.17131e+08	1.276e+08	1.23606e+08	1.1285e+08	1.40436e+08	1.41211e+08	1.28513e+08	1.20179e+08	1.02686e+08	1.23672e+08	1.42419e+08	1.17808e+08	1.16143e+08	1.31568e+08	1.37605e+08	1.2684e+08	1.12346e+08
SERPING1	4.87539e+08	5.61138e+08	7.209e+08	5.6635e+08	5.24866e+08	4.12048e+08	5.88938e+08	5.80198e+08	3.79581e+08	4.26633e+08	6.94069e+08	6.63766e+08	3.89586e+08	7.53073e+08	7.38107e+08	3.63192e+08	7.17789e+08	5.94877e+08	5.4251e+08	5.39179e+08
SERPINI1	598415	1797700			1014000					1555080	803331		51578560	1839270	2522910	28262355	909135		57809320
SET	2.04958e+06	1.55226e+06		1.91609e+07	3814125		2.15427e+06	1.70025e+07	3.27649e+06	3.25054e+06	1.23246e+06	1.73905e+06	4.13968e+06	1.09684e+07	2.95676e+06	3.71286e+06		3230240	2.92647e+06
SETD1A	1759830	1208910		1.1265e+06		1117155					2289280						1072560		988313
SETSIP	2.04958e+06	1.55226e+06		5.36244e+06	3814125		2.15427e+06	421034	1.55534e+06	1.3254e+06	1.23246e+06	1.73905e+06	4.13968e+06	1.59467e+06	2.95676e+06	2.93063e+06		3230240	1.19559e+06
SEZ6L2	17622700	17418900	12667080	11722800	43193300	20119300			3.00963e+07	19083300		17518300		11842400		1.86934e+07			18002500
SF3A2	201897				153362		181419		208921						108944		102894
SF3B1	1.36788e+07	1.30354e+07	3.95027e+07	2.75544e+07	2.30478e+07	1.32608e+07	2.71894e+07	1.10962e+07	2.1239e+07	2.21285e+07	2.07639e+07	4.23077e+07	1.0374e+07	2.45566e+07	18106355	2.82858e+07	2.13071e+07	2.20786e+07	3.71847e+07	1.82066e+07
SF3B3	531378	527948	227318	665366	158826	193826	686119	338003	155512	1.07754e+06	989416		1.67597e+06		1.43127e+06	1.28934e+06	564622	720526	443743	872224
SF3B6	7.40129e+06	8576825	5.66159e+06	5087835	2.2093e+06	5.42209e+06	6.22871e+06	2.52737e+06	5877883	6.69668e+06	4981745	5.22856e+06	6.68581e+06	9.09184e+06	6.11044e+06		5946004	6.78373e+06	7.93273e+06	8.871e+06
SFN	2.60365e+06	1.1948e+06	1.29126e+06	1.16594e+06	886458	1.01645e+06	1.35261e+06	1.08828e+06	1.01825e+06	1.10835e+06	1.32439e+06	2.01144e+06	1.08709e+06	1.27064e+06	1.08399e+06	1.0683e+06	3.55672e+06	1.20984e+06	1.07851e+06	2.28808e+06
SFTPC	104610				307716								307387	76573.5				86959.5
SGPL1	368916	1015143	787889	1.01715e+06	581341	770774		617500		935825	513177	720421	817910		556949		610539	684397	829375	400557
SGTA	4.95445e+07	1.22815e+08	7.6554e+07	1.05114e+08	8.02806e+07	80665964	107641900	9.31878e+07	6.59447e+07	102155670	1.00017e+08	71064960	98491300	126346200	1.10957e+08	70145802	101286100	92910933	8.59261e+07	9.13813e+07
SH3BP1	163767	152906	212937			244428	339719												3.79431e+07
SH3GL1	999992	89088.7		526029	668470	484918	1.29642e+06	504576		702690		537245		587345		1.25595e+06	530229		1.27331e+06	377174
SH3YL1	7.41147e+06				6.21314e+06	3994960	6873810	4961590	2.81188e+06		2925950	7110204	8949725			4320875	5923220	0	3345660	7124320
SHBG	1.23788e+06	1.2989e+07	1.19422e+07	2.78371e+06	1.02429e+06	5.1296e+06	4.37885e+06	2.40733e+06	1.19664e+07	7.40169e+06	3.74324e+06	6.91444e+06	2.19836e+06	930092	3.97963e+06	903718	1.50063e+06	1.8661e+06	1.43927e+06	1.83494e+06
SHMT2	1.15041e+07	1.52087e+07	10511950	24375400		497133	11111700	816810		993949		514032	6248700		6.62864e+06	455829			1.25993e+06	7.47696e+06
SIN3A	2968500	590575		3.20947e+06					2051690	206201		1.77183e+06	3.52458e+06	3944293	3233320		3505585	2734065	1699380
SIRPA	296156	809141	586049	682220	581045	442790	497627	432499	438212	733289	474081	571162	421694	591622	590813	517728	7.51232e+06		454327	516729
SIRPB1	2.11982e+07	26170691	7.48077e+06	682220	581045	442790	2.09495e+07	3.06434e+07	2.71365e+07	733289	1.14442e+07	21550275	2.3943e+07	2.88542e+06	1.5843e+07	3.18402e+07	3.96932e+07	13943500	2.02056e+07	2.42634e+07
SKAP2	1832410		6232432	2.32321e+06	4422180	3003255		1.60746e+06					1.43519e+06	1963860	6.08165e+06	0		3.43669e+06	1953340	3040555
SKIV2L	4.11783e+06	1.84442e+06		2.78687e+06	1607015	3015940				1260145	8101405		2.21333e+06			3041140		2.09446e+06	3042240
SLC16A3	152575	1.15203e+07	241895			9.92362e+06		368337		386744	629852	179077	501221		0	151893	709363	11771580		75830.7
SLC17A5	2335065	1.40294e+06			1065788	3717260	2207565	1995794	3441435			2.07937e+06		4010330			1.07502e+06	2.14294e+06	3.06389e+06
SLC25A10	112322					162449				52999.5			222597					109388
SLC25A13	647681	2683305		3837115	0			2.58528e+06			1.6817e+06	2441310		5838245	0		1.99124e+06		857235	2810285
SLC25A4	961430		43694
SLC25A6	961430								1028800					1091055
SLC27A2	445336	3.45214e+06	2883660		2.56914e+07		2.88682e+06	2715996	2653870	3554238			2877648	2.12691e+06	3239195	3572590	2465770	2.13118e+06	2.05669e+06	102237
SLC2A6	2.17332e+06														2041596
SLC30A9	79387.3								573624					162694
SLC33A1	272742	518411				293648			569064					755914						830090
SLC35B2	7.51069e+06	6.33426e+06	7.31895e+06	7.61217e+06	9.033e+06	3130516	6.45692e+06	8.1391e+06	9.96033e+06	6402360	5.68599e+06	6.34716e+06	9.87782e+06	8.87905e+06	9.2068e+06	8.23204e+06	4.93196e+06	6.25103e+06	7.16273e+06	7.96362e+06
SLC44A2	400818			112127	317767	332616			791030								442858	2732855	330034
SLC49A4	374266									214331					390639
SLC4A1	5.77078e+06	7.80338e+06	1.05752e+07	8.54589e+06	8.14644e+06	8773500	5.67855e+06	4.56789e+06	3.40377e+06	5.49289e+06	4.83045e+06	5.95302e+06	8.32723e+06	1.06789e+07	5285001	7.40047e+06	3.70483e+06	7.46377e+06	5.90979e+06	4.40841e+06
SLC4A2	17164568	1.74604e+07	13688698	16557350	15173050	0	7.46597e+06	1.76968e+07	9.60562e+06	13943925	1.55938e+07	10563828		1.0911e+07	20994050	1.97105e+07	1.55191e+07	17300269	10243180	11151575
SMARCA2	2.08644e+07	28851320	12173050	3.04737e+07	21804100	26860200	2.74495e+07	33934375	2.419e+07		30839225	2.66963e+07	1.3821e+07	2.18589e+07	24245550	19618990	19197520	3.10129e+07	21161025	0
SMARCA4	2.08644e+07	28851320	12173050	3.04737e+07	21804100	26860200	2.74495e+07	41201755	2.419e+07		37074705	2.66963e+07	1.3821e+07	2.18589e+07	31481325	2.23527e+07	19197520	3.86888e+07	21161025	0
SMARCD2	3.3441e+06	2066366		4.56594e+06	5086030	3073080	4.23335e+06			6317815	796630	5816485	2.95891e+06	714005		1.75708e+06	4.43559e+06	2895265	4165040
SMC4	460238	2145870							472498		468760		166298		351165	722861				543808
SMPDL3A	16618700	171905						9210750	16927500		9221377			1.35517e+07	19823500		8323800			18883300
SMS	1022385			136418
SNCA	5.10151e+06	33188980	6750795	9243630	7007800	6912070	5.45246e+06	9658830	6874752		6547740	3243975	3221610	8770300	7612380	4010916	5.77233e+06	9213470	5.84795e+06	7910040
SND1	3.08905e+06	4141095	3.57952e+07	4903010	3.0126e+06		3100264	3.75177e+07	32620785	5277040	2.62177e+06	2.92988e+06	23689500	29054335		4566744		25659780	2.83461e+07	1.18738e+06
SNRNP200	730593		3.05529e+06		2810700		2317085	5143135	4076691	245123	1022840	2.12135e+06	18832225	792930			6921320		5.81955e+06	3.43285e+06
SNRNP40	657926		715760	0	170052	889862	582192	76943.3				825382					652320	415872		362532
SNRPB	3462420	2.60596e+06		554336	600170	3792480	1.57197e+07	655088	2.26133e+06	1470204	1.05321e+07	9.47762e+06	1.86663e+07	9.67796e+06	8.70595e+06		1.15796e+07	3.89215e+06	1.45516e+06	8.73506e+06
SNRPN	3462420	2.60596e+06		554336	600170	3792480	1.57197e+07	655088	2.26133e+06	1470204	1.05321e+07	9.47762e+06	1.86663e+07	9.67796e+06	8.70595e+06		1.15796e+07	3.89215e+06	1.45516e+06	8.73506e+06
SNTB2	154473000	7.85767e+07	0	9.08697e+07	2.37084e+08	91101800		62792000	106950400	1.60517e+08	107065302	56248500		87638600	194385825	1.23674e+08	109552040	9188400
SNX27	2.87115e+07		56897450	5.06102e+07	5.08813e+07		35529600	4.05403e+07	3.71138e+07	24981420	36289675	36680650	37517355	3.69942e+07	48548750	52257500	2.30654e+07		42880800	50103150
SOAT1	18106350		20593300	6161600	9.18387e+06		18459900			1.83194e+07	24230050	6857580		25253600			19015900		2.37856e+07
SOD3	357238		482109	1.62006e+06	1.57598e+06	401291		1.45263e+06	705823	1.37128e+06		1.3295e+06	4071820		800734	1.12773e+06	664425		336197	4.27314e+06
SORD	2.51738e+06		955187	104534	2.9956e+06	2.31602e+06	2000248								2.26658e+06	583312
SORL1	832128
SPAG9	164970														658998
SPARCL1	108101	12593977	324492	363212		127380	342532		185884	122807		44745.8		5577350	198059		72631.5		601326	206143
SPECC1L	3.53888e+06	5.25724e+06	6020331	5236050	1946750	6.18006e+06	4.31652e+06	3861820	6482250	5494600		4.81088e+06	6192080	5730760	7343105	7.49039e+06	1.42156e+06	4.63179e+06	6.77904e+06	7908565
SPG11	1.25426e+06	1463297	2439628	2043394	2250281	1941777	1582382	1772693	2158949	2026340	1756370	1583968	1842436	2370069	2170543	1886173	1946142	2175544	1899657	1873340
SPP1	2.48246e+06		1.84861e+06	2.44494e+06	2.57587e+06	3.92842e+06			1.34607e+06	2.91529e+06	3.29692e+06		69104.2	1350405	1163716		3.85403e+06	1900080		1378110
SPTA1	5.45153e+06	33215000	3.47144e+07	1.75613e+07	1.1897e+07	12837077	2.49657e+06	1788642	1.11014e+07	1.41082e+07	2.61841e+07	1285580	1.11283e+07	2.34088e+07	2562855	1.34557e+07	1.88632e+07	3940595	9.86978e+06	3.21404e+06
SPTAN1	1.02663e+07	1.50824e+07	1.79648e+07	1.56843e+07	1.52509e+07	1.416e+07	1.4014e+07	1.47509e+07	1.44372e+07	1.26925e+07	2.62532e+07	2.59175e+07	1.56845e+07	3.22212e+07	5.39809e+06	4.96212e+07	2.45708e+07	2.72071e+07	1.55732e+07	8.74235e+06
SPTB	2.64031e+06	480283	3.43646e+06	7.14278e+06	630575	822840	450301	6.36652e+06	2.23483e+06	3.07174e+06	1.09836e+07	1.46921e+06	8712420	928833	5.50725e+06	4006374	5.99996e+06	5.13243e+06	5.17108e+06	5.5205e+06
SPTBN1	7.48863e+07	5.45896e+07	8.03287e+06	1.07536e+08	2.3202e+07	7.41503e+07	9.69035e+07	2.88707e+06	8.34827e+07	1.01605e+08	9.79505e+07	8.49849e+07	8.28763e+07	1.36619e+08	9.0977e+07	6.20614e+07	1.02484e+08	8.05929e+07	9.36043e+07	4.97065e+07
SRC	533307					1884153		428568		597766	1.67286e+06	401464	3.06967e+06	1.29465e+06	1.91187e+06	1.73646e+06	2.90282e+06	399510	360630
SRPK1	2066682	833435	2332955				1.87179e+06			1.59415e+06			3957225
SRRT	7708500	3987240			836110	10613268	2360100		1.14626e+06					16638150			11608650		6.70769e+06
SRSF3	1.02881e+06	1.12774e+06	1.07809e+06	711498			1.01025e+06		1.60408e+06		2.53188e+06	530958	622353	2.15894e+06		3.63747e+06	710686	4615870	3.08989e+06	909932
SRSF4	764948	915211	7.68247e+06	1.00371e+06	961369				1.06158e+07		8.54113e+06	8837575	730915	1.33778e+06	846453	10852050	901589		1.30357e+06	1.34159e+06
SRSF7	1.02881e+06	1.12774e+06	1.07809e+06	711498			1.01025e+06		1.60408e+06		2.53188e+06	530958	622353	2.15894e+06		3.63747e+06	710686	4615870	3.08989e+06	909932
SSB	6000500	6558790	7385298	7.27658e+06	6021245	6200510	6152230		7361590	7.14452e+06	7411880	8.84299e+06	6353730		6.77403e+06	5677740	6.74129e+06	7096410	7.18952e+06	7059060
SSRP1	242214	272281	298422					235739			2.40321e+06	1384895			660416	4.74546e+06	161936			4978701
ST6GALNAC4	32989400	1.94239e+07			9.47473e+06		14322050	32652600	28869000	34716600				30675300			34947900		9.47693e+06
STAM2	3.04062e+06
STAMBP	4532345										912440					426570	0		6077875
STARD10	963316			921305		792689	821116	3196460	1.83356e+06	738568	762008	1841180	2013055		1.2148e+06	1.50067e+06		866344		1.25784e+06
STAT1	2596184	512644		4.64443e+06				3.60835e+06		4297906			498512		916516	6.5173e+06	2.35196e+06	1.76683e+06	2245935	4439740
STAT2	551420				2520220	2225095									1.37603e+06				1.7142e+06
STAT3	1.39714e+06	1.89125e+06	1.53847e+06	901477	165335		3956050	1620105		2351610	1914020	1686060	1.68754e+06	48328.5		37937.6	1.16286e+06	866855
STAT5B	200961				1.71185e+06			917755	2711642	2739690		906292	1489330			4315342				722065
STEAP4	733170			649658	1.34036e+06		560092	666306				474817					874035	1572580
STK39	2509770						3.20408e+06	2.38074e+06	3.16602e+06		1.91585e+06			781472			1187795		2.59473e+06
STOM	192152					75024.9				415818						83699.6	8817850		9866375
STRBP	271360
STRIP1	610596	273707	693764	755593	731342	866726	791330	977397	606504	1.59168e+06	105572	355322	428885	841288	759388	2.2433e+06	992686	916620	924466	705999
STRN	15739560			2.97917e+07			2.9005e+07		4656090					94399.6			18942300
STT3B	1367690	22178600	779676		402927							242239	348796	1.3328e+06					937795
STX1B	1342055	0		3156585				1645270			2292765		1647875	1.57453e+06			3160560
STX8	296045	40907500		367386	355887	289740	177695		396649	567941		339193		750014	601854	517416	682356	394202	560041
STXBP5	29019350	40268750	45649500	25570500	42320000	32105400	42880750	32230750	40846950	44001750	41382400	39676850	28348800	42230650	23776500	40528400	38168400	21396800	18472900	46005000
SUCLG2	32491675	1.26595e+07	3.01299e+07	4.73122e+07	4.78727e+07	34829700	3.76009e+07	51064625	37280900	44261150	34243620	3.24168e+07	4.41997e+07	42760150	55154650	44036400	3.89879e+07	42763100	4.01348e+07	30323850
SULT2A1	2611470		1650225		2877160				1426550	3185590		2506940	2321250	1583840	1580210
SUMF2	3478535		9.76767e+06						56409.5	5.06838e+06
SUOX	1.73518e+07	25824700	25574375	21923200	2.16647e+07	1.84749e+07	1.70333e+07	3.23494e+07	2.69264e+07	23884900	2.8264e+07	24226900	17965750	2.4436e+07	20288170	1.69983e+07	2.2707e+07	2.87039e+07	1.3117e+07	2.93245e+07
SUPT16H	3.09963e+07	1.90603e+07	64795250	2.94962e+07	39022710		39602200	43071350	23157750	35526700	3.65866e+07	2.17996e+07	61538660	4.39594e+07	2.93787e+07	4.84414e+07	4.271e+07		4.38015e+07	3.11914e+07
SUPT6H	1.13241e+07	1.4154e+07			10290400	16987895	1.66228e+07		1.58623e+07	12102250		16210950	1.69332e+07		17461160	17855240		2.07649e+07
SVIL	6560050			6.2217e+06	718287	2.38003e+06		369480					9.12958e+06	4.16569e+06			9872780	960649	1120156	0
SYNE1	5.54039e+07	5.99059e+07	7.16716e+07	3.36172e+07	4.40087e+07	30230531	4.8624e+07	7.46762e+07	3.47042e+07	45324523	4.397e+07	4.70805e+07	37531120	3.11815e+07	5.12024e+07	5.73551e+07	5.53913e+07	54683688	41882706	28886461
SYTL1	9079825	1.55641e+07	1.23084e+07	1.24064e+07	9.44142e+06	1.63333e+07	17130830	1.1162e+07	1.11657e+07	6356900	1.38735e+07	8838555	1.14305e+07	2.00833e+07	14086125	1.17915e+07	1.5486e+07	1.88983e+07	0	9639240
TACO1	414125		2497194	1170309	1.35471e+06	659350	3.41439e+06	239381	1.13445e+06						1.45498e+06		1758605	1.10137e+06	862672	735930
TAF15	20403300				1.32639e+07		15702408					1.51846e+07					1.37257e+07		12687700
TAGLN	40535873	3.1848e+07	42941320	2.72361e+07	4.36491e+07	4.71779e+07	3.6172e+07	58718400	4.76209e+07	28966695	54853050	37778120	43304225	5.25076e+07	4.91009e+07	21824100	44395250	4.10104e+07	53889640	4.66518e+07
TALDO1	7.9727e+08	600382961	8.7431e+08	729950665	7.81717e+08	7.73266e+08	8.45605e+08	8.71893e+08	6.41371e+08	6.0108e+08	7.10924e+08	5.43383e+08	8.1207e+08	9.33519e+08	8.32121e+08	8.24453e+08	6.58673e+08	7.83325e+08	7.76001e+08	8.9783e+08
TARDBP	1.05266e+06	1856795	2198295	153260		3.98827e+06	3159260		3.60289e+06		4516400		4.25443e+06	3.29653e+06			5860405		3067235	2.95671e+06
TBC1D10C	235560							3.28953e+06					2080980
TBC1D13	4136000	5.66548e+06	3717990	4264310	3.913e+06				4540545						3.16025e+06	465016	7.61523e+06	5867745		4648125
TBCD	787532	663196	823454	1.01042e+06	1.20843e+06	922375	813918	1.33214e+06	993696	1.10398e+06	1.12438e+06		1.18532e+06	1.36975e+06	935261	1.7442e+06	1009732	779306	837162	689750
TBCE	4876890	1.92137e+07		7472960				2.26447e+07		0	1971266		22599315	5.71086e+06	12353500		2.89652e+06		32808100	11280450
TBXAS1	40060.2																	44803.3
TCF20	13723600					15529600			2883090		0								20441950
TCN1	184421	1.63757e+06	5052380		1.54388e+06	76799795	2535925	74459000	3.96357e+06		3468054	2.00296e+06		1456000			1005810		3.05087e+06	3479580
TF	5.11152e+09	5.4098e+09	5.81617e+09	5.94281e+09	5.38566e+09	4.81014e+09	5.60535e+09	5.96503e+09	5.39093e+09	5.35479e+09	5.935e+09	4.82601e+09	5.04557e+09	5.35518e+09	5.57021e+09	5.04916e+09	5.199e+09	5.91984e+09	4.9805e+09	5.55917e+09
TFAM	1.64669e+08	1.58691e+08	1.999e+08	1.49505e+08	1.65713e+08	1.30339e+08	1.513e+08	1.8332e+08	172714650	1.7667e+08	1.63918e+08	1.68335e+08	1.65345e+08	1.56992e+08	1.6103e+08	1.73873e+08	1.61845e+08	1.88895e+08	1.63575e+08	1.54421e+08
TFAP2A	1.56352e+06		671392	619657	1659060							2.10378e+06		931853	603358	1.81856e+06				1.55251e+06
TFAP2B	1.56352e+06		671392	619657	1659060							2.10378e+06		931853	603358	1.81856e+06				1.55251e+06
TFAP2E	1.56352e+06		671392	619657	1659060							2.10378e+06		931853	603358	1.81856e+06				1.55251e+06
TFRC	4.16265e+06	6.34212e+06	4.75284e+06	8.61112e+06	2.36936e+06	7.1811e+06	2.50415e+06	3.17342e+06	196368	4.15762e+06	5.10919e+06	4.06472e+06	5.14437e+06	2.82885e+06	440599	2.02296e+06	969299	4.49815e+06	4.49525e+07	3.42436e+06
TGFBI	5.40596e+07	6.30801e+07	7.23448e+07	6.54072e+07	2.01305e+07	2.85259e+07	6.81314e+07	8.0539e+07	1.46756e+07	5.40672e+07	4.68857e+07	3.5469e+07	5.2886e+07	7.32181e+07	3.39716e+07	5.95253e+07	2.36641e+07	2.42105e+07	6.23683e+07	8.79471e+06
THBS1	6.8265e+06	1.20747e+07	3.3402e+06	3.36105e+06	3.25802e+06	3.11323e+06	1.10246e+07	4.36492e+06	4.60419e+06	2.965e+06	2.23588e+06	3.73203e+06	5.8503e+06	5.68158e+06	3.17654e+07	5.28449e+06	2.53753e+07	5.00979e+06	3.44003e+06	9.40675e+06
THBS4	568645		17705.6						82749.6				156089	0	1544305
THOC2	165416															1167895				469465
THOC6	2.33101e+07	2.51028e+07	3.29719e+07	2.77658e+07	2.49329e+07	2.68264e+07	3.06187e+07	33821520	3.43185e+07	2.85109e+07	2.68615e+07	2.61921e+07	2.25389e+07	2.52895e+07	2.98814e+07	2.40511e+07	2.84309e+07	29503640	2.16596e+07	2.76547e+07
THRAP3	230793	4.00917e+06				653805	3051945	0					6427430			4212555			0
THUMPD3	395027
TIMM10	9362250			4821690		3.33272e+06	2.6777e+06							1.75468e+06			5252570	9059388
TIMM44	2.35384e+07	1.83967e+07	2.13502e+07	23281760	1.82626e+07	17822152	2.11299e+07	2.21364e+07	1.63189e+07	2.27925e+07	1.33546e+07	3.43185e+07	21700575	2.67413e+07	31184350	3.44829e+07	1.80437e+07	19075030	25840570	20894500
TIMP2	0		10888400			8603980		8166245			5556100
TJP3	548727			2.7732e+06		812910					1423745			1.22182e+06					0
TKT	5.95433e+07	1.30755e+07	16508045	1.53593e+07	1.19295e+07	7.7089e+06	9.63149e+06	1.29618e+07	1.47366e+07	2.08587e+07	15319620	7.22351e+06	1.86528e+07	1.05026e+07	1.24566e+07	1.6396e+07	1.72398e+08	14647442	1.90243e+07	11931839
TLE3	577653	255524			553778	296569		996701	515313	364840		244289	864690	460810			373617	300745	349837	380057
TLK1	1.99144e+06	2.46297e+06	2.86679e+06		2.69416e+06	2.37053e+06			2.64326e+06	2.46439e+06	2760029	2.01912e+06	3757540	2.15528e+06	3.44418e+06	3.19069e+06	3.13942e+06	3.41464e+06	3.43482e+06
TLK2	1.99144e+06	2.46297e+06	2.86679e+06		2.69416e+06	2.37053e+06			2.64326e+06	2.46439e+06	2760029	2.01912e+06	3757540	2.15528e+06	3.44418e+06	3.19069e+06	3.13942e+06	3.41464e+06	3.43482e+06
TLN1	2.18683e+09	3575470673	3.77584e+09	2.52721e+09	3.56813e+09	3.6034e+09	2.29656e+09	3.47512e+09	3.0153e+09	2.23932e+09	3.63633e+09	2.98229e+09	3.49867e+09	3.72795e+09	3.72824e+09	3.5262e+09	3.50429e+09	3.71984e+09	1.77563e+09	2834073804
TLN2	706264		115923			42424.7		372926	1602260	842263		4.94787e+06	102232			579435		8861745	1020046
TMEM205	5.19882e+06	1.61711e+07	19067500	22418260		1271430	5205542	15514980	4.66204e+06	1.97544e+07	16070420	1.62103e+07	11652140	15904890		21608015	1.55572e+07	1.89682e+07		20815490
TMEM256	5.16333e+07	1.06401e+08	9.34769e+07	9.38428e+07	101589050	68431800	87906730	8.76009e+07	9.391e+07	85671250	7.40082e+07	8.25795e+07	7.12758e+07	9.45333e+07	7.92014e+07	8.15657e+07	1.0064e+08	102509000	65830800	7.88785e+07
TMEM97	3.98135e+06		7.15687e+06	4.32844e+06	8.89421e+06	2.5992e+06	4782085			4.61153e+06	5.45945e+06	5.6928e+06	5.37722e+06	5414100	1.07134e+08	3.60977e+06		6.54863e+06
TMX4	6390908	6.47643e+06	5.6253e+06	4406770	8263885	6.14101e+06	5999825	6943095	592030	7290350	6635900		7305000	1.29527e+07	3950600		11713400	8.37357e+06	4273886	4926550
TNC	1.82438e+07	4.60865e+07	3.19084e+07	3.0218e+07	4.74099e+07	2.14132e+07	2.44597e+07	1.58695e+07	1.62259e+07	2.8043e+07	2.11847e+07	1.19887e+07	1.82068e+07	3.25294e+07	2.32319e+07	2.31161e+07	2.16507e+07	2.13402e+07	2.29738e+07	1.45541e+07
TNPO1	5549138		729305	17779168	193568			8.80565e+06	7.25031e+06	778265	1909570		1.2013e+07			411304	5587350
TNS1	1.19457e+06	1.60849e+06	1.66801e+06	2.51134e+06	2.2579e+06	2.29979e+06	1.39779e+06	2.13293e+06	1.61175e+06	2.50424e+06	1.98511e+06	1.11833e+06	1.52541e+06	1.79926e+06	1.49847e+06	1.65418e+06	1.81144e+06	1.82248e+06	1.29658e+06	2.21866e+06
TNS2	2.98731e+06	1.60849e+06	1.66801e+06	1.44331e+06	1.33144e+06	1.78684e+06	4.64223e+06	1.43622e+06	6.91872e+07	1.92371e+06	1.63518e+06	936217	7.45775e+07	1.79926e+06	2.94377e+07	1.65418e+06	1.53666e+06	1.70416e+06	1.29658e+06	1.70687e+06
TNS3	1.04057e+06	1.60849e+06	1.66801e+06	1.44331e+06	1.33144e+06	1.78684e+06	1.39779e+06	1.43622e+06	1.61175e+06	1.92371e+06	1.63518e+06	936217	1.52541e+06	4.65784e+06	1.49847e+06	1.65418e+06	1.53666e+06	1.70416e+06	1.29658e+06	2.20341e+06
TNXB	2.20712e+08	1.71139e+07	4.73159e+07	2.9399e+07	5.77686e+07	5.04288e+07	5.72263e+07	3.14276e+07	1.88243e+07	5.86659e+07	4.05059e+07	8.38957e+07	5.17243e+07	7.57106e+07	3.13077e+07	3.5162e+07	2.54237e+07	3.3864e+07	7.90796e+07	4.80812e+07
TOLLIP	8.83963e+06	8.46891e+06	1.44727e+07		7195320			9477600	4114110	7690600	10173560		8500860		8682080	5935755	9.34397e+06	2.21533e+06		439026
TOM1	185076		710918
TOR1A	769496											249559	183934
TP53BP1	0	1.1232e+06	5.97663e+06		0				8491950				22990700	405193	1.02376e+06	1290510		1.41902e+07	600439
TPD52L2	9.01273e+06	2.38579e+07	863715	1.11984e+07	2.37269e+07	1.39211e+07	1.56167e+07	15581684	1.46593e+07	1.23749e+07	1.52875e+07	1.13145e+07	1.97113e+07	1.78462e+06	732104	16136475	1.44905e+07	896210	968582	13201572
TPI1	1.41225e+06	1646090	717675	2.06552e+06	286564	440271			25420721	55361869	3.38704e+06	3.93706e+07			3.19498e+07	42908400	940831	1081535	4016809	3.43438e+06
TPM3	6929900				17087300			1.2123e+07	6.28498e+06	3.99023e+06		5.52992e+06				766948	7987750			127435
TPM4	5351864	362922	139741	575582	7.07328e+06	1.29718e+07	378461	460942	7.50726e+06		333445	127284	124692	903751	5.7839e+06	134964	95250.1	114172	606940	227319
TRA2B	0					161679	906000		0		12964150			510000	14043950
TRAF2	1220590	4213605		1383620			551658				611300	299303							610779	3135140
TRIM24	11599200			6726320	4.20425e+06			2.7755e+06							1.28732e+06	36997600	3977855	14550860
TRIP12	29667700			35715650												2.57266e+07			33865000
TRIP4	1035024	2862460				429274	14474685		1.25136e+06				4.1883e+06			2.05758e+06	1.24175e+06	3.88086e+06
TRMT6	249187	201245								349003				172092
TRRAP	852415								64336.5									8.08807e+06
TTC37	9214200	13070000	16950900	1.54592e+07	10507700	2962100	9753400	8.78617e+06	1.12865e+07	8960280	13568150	15114640	6362700	14844000	17607950	11433400	14191100	4664600	14901900	7158000
TTR	4.88487e+07	4.70987e+07	4.37274e+07	4.06101e+07	4.39653e+07	3.90267e+07	6.35351e+07	4.36123e+07	4.37587e+07	4.71115e+07	5.77799e+07	3.62013e+07	4.46542e+07	4.85494e+07	5.4209e+07	3.76391e+07	5.45577e+07	6.25836e+07	4.37266e+07	4.67759e+07
TUBA1A	5.39348e+06	5.41808e+06	7.13757e+06	6.09003e+06	6.77715e+06	6.85401e+06	7.25098e+06	3.74975e+06	4.45571e+06	5.11619e+06	8.35947e+06	5.5821e+06	5.48611e+06	8.47056e+06	5.54761e+06	5.54637e+06	3.91927e+06	5.74677e+06	5.51378e+06	5.49401e+06
TUBA1B	5.41863e+06	5.42903e+06	7.14951e+06	6.11803e+06	6.79602e+06	6.85401e+06	7.26076e+06	3.76986e+06	4.47453e+06	5.08966e+06	8.38141e+06	5.59118e+06	5.48611e+06	8.46847e+06	5.54761e+06	5.54637e+06	3.91927e+06	5.7991e+06	5.52492e+06	5.48226e+06
TUBA1C	5.41863e+06	5.42903e+06	7.4929e+06	6.11803e+06	6.79602e+06	6.85401e+06	7.26076e+06	3.76986e+06	4.47453e+06	5.08966e+06	8.2059e+06	5.59118e+06	5.48611e+06	8.46847e+06	5.54761e+06	5.54637e+06	3.91927e+06	5.7991e+06	5.52492e+06	5.48226e+06
TUBA3C	5.33161e+06	5.41808e+06	7.04322e+06	5.97903e+06	6.36692e+06	5.16995e+06	7.25098e+06	3.39812e+06	4.37248e+06	4.98996e+06	5.47843e+06	5.54869e+06	5.46248e+06	8.07774e+06	5.27351e+06	5.50817e+06	3.80903e+06	5.43561e+06	5.25134e+06	5.44323e+06
TUBA3D	5.33161e+06	5.41808e+06	7.04322e+06	5.97903e+06	6.36692e+06	5.16995e+06	7.25098e+06	3.39812e+06	4.37248e+06	4.98996e+06	5.47843e+06	5.54869e+06	5.46248e+06	8.07774e+06	5.27351e+06	5.50817e+06	3.80903e+06	5.43561e+06	5.25134e+06	5.44323e+06
TUBA3E	576692	1.14793e+06	721275	997905	1.34748e+06	584763	4.06008e+06	1.25241e+06	874972	851665	1.02999e+06	1.18481e+06	908122	1.23474e+06	822135	894546	703397	919711	1.13199e+06	1.10143e+06
TUBA4A	5.35675e+06	4.98392e+06	7.15621e+06	5.8862e+06	6.01155e+06	6.8329e+06	7.11208e+06	2.99711e+06	4.3913e+06	5.39631e+06	5.50037e+06	5.07492e+06	5.5585e+06	8.61142e+06	5.70108e+06	5.50817e+06	4.66015e+06	5.60055e+06	5.15952e+06	5.43148e+06
TUBA4B	25144.4	10955.1	11936.6	28000.6	77246.6		3.29724e+06	20108	18819.8	19754.3	21940	9073.48		60760.2			0	52326.9	11148.6	21289.6
TUBA8	4.78006e+06	4.40395e+06	6.4624e+06	5.00913e+06	5.09669e+06	4.58519e+06	6.54089e+06	2.17514e+06	3.53933e+06	4.15805e+06	4.6459e+06	4.37295e+06	4554360	6.90376e+06	4.45137e+06	4.63092e+06	3.10564e+06	4.62832e+06	4.14123e+06	4.36308e+06
TUBB	6.425e+06	2.98781e+06	1.12787e+07	9.11852e+06	7.51841e+06	1.05133e+06	1.05276e+07	1.10228e+07	1.50791e+07	1.08993e+07	6.25303e+06	1.75294e+07	7.64607e+06	1.55401e+07	7.87128e+06	7.52632e+06	9.52551e+06	1.65597e+07	1.40625e+07	1.03025e+07
TUBB1	5.27763e+06	677359	1.0648e+07	2.8868e+06	7.82953e+06	1.61972e+06	1.13111e+07	8.41028e+06	6.79308e+06	1.97926e+06	3573302	8.02347e+06	5.06523e+06	1.5024e+07	1.60644e+06	6.06414e+06	6.72551e+06	6.90084e+06	7.72455e+06	1.01648e+07
TUBB2A	6.08022e+06		8.28344e+06	6.10943e+06	4.77962e+06	305561	9308300	7.78562e+06	1.21365e+07	9.16135e+06	4692075	1.48479e+07	6.46348e+06	1.15438e+07	2.96941e+06	6.34529e+06	8.23957e+06	1.24224e+07	1.16515e+07	1.22783e+07
TUBB2B	6.08022e+06		8.28344e+06	6.10943e+06	4.77962e+06	305561	9308300	7.78562e+06	1.18306e+07	9.16135e+06	4692075	1.48479e+07	6.46348e+06	1.15438e+07	2.96941e+06	6.34529e+06	7.11102e+06	1.24224e+07	1.16515e+07	1.22783e+07
TUBB3	601187	1.76573e+06	7.71848e+06	93407.3	2.87238e+06	305561	278574	303132	8.89444e+06	2.47477e+06	1.38408e+06	362725	2.58741e+06	1.94311e+06	1.01629e+07	777627	9367978	2.06485e+06	586206	987224
TUBB4A	601187	646394	7.71848e+06	153937	449041	305561	278574	303132	8.84679e+06	2.49429e+06	187990	362725	1.23631e+07	794458	1.01629e+07	777627	9367978		229833	309612
TUBB4B	5.87882e+06	646394	1.60019e+07	5.74431e+06	5.22866e+06	305561	9.58687e+06	8.08875e+06	2.06297e+07	1.04121e+07	4.88007e+06	1.52106e+07	8.00051e+06	1.19494e+07	1.29199e+07	7.08703e+06	1.55198e+07	1.2287e+07	1.18813e+07	9.4415e+06
TUBB8	5.27763e+06		8.28344e+06		4.77962e+06	305561	9308300	7.78562e+06	5.97756e+06	1.24352e+06		6.34265e+06	3.30878e+06	1.12909e+07			6.15182e+06	6.48481e+06	5.94492e+06	9.13189e+06
TUBB8B	5.27763e+06		8.28344e+06		4.77962e+06	305561	9308300	7.78562e+06	5.97756e+06	1.24352e+06		6.34265e+06	3.30878e+06	1.12909e+07			6.15182e+06	6.48481e+06	5.94492e+06	9.13189e+06
TWF1	7493975																	3580210
TXNDC5	2.10973e+07	1.07057e+07	2.77734e+07	3.61102e+07	2.03015e+07	2.85299e+07	7.66928e+06	1.9627e+07	4.24619e+07	5.58545e+06	2.55649e+07	42049895	2.17093e+07	2.38673e+07	2.60803e+07	19359525	1.59405e+07	3.20513e+07	2.26889e+07	26233635
TXNL4A	24946150	8060896	6827750	15328850	15204570		21764500	1.39155e+07	2.19511e+07	20877150	18792970	20989150	21034200				2.64378e+07	10727180	20003540	1.0989e+07
TXNRD1	1.64744e+06			4107040			16053300	3.00044e+07	438472		940582	895671	978612	455166	5.04402e+06	1.70149e+06	25804090	3120101	95756.2	1.05425e+06
TYMP	2.25083e+06	57400395	5.85408e+06	1.4826e+07	70715628	4.62768e+07	4.49297e+07	1.70661e+06	32300408	6.01977e+06	41296854	5.58224e+07	5.96166e+06	2.34553e+07	5835771	4.41737e+06	33925160	6.14761e+06	2.84244e+07	4.73908e+07
UBA1	1.53654e+07	4.41618e+07	2.34277e+07	3.11261e+07	2.10696e+07	1.4515e+07	1.24863e+07	8.03944e+06	2.36901e+07	4.78104e+07	2.63241e+07	1.26302e+07	2.93446e+08	7.14258e+06	1.5165e+07	2.688e+07	1.4006e+07	9.36151e+06	2.08775e+07	5.44599e+06
UBA2	776525	2.21806e+06		4.23848e+06	3.25048e+06			348377	112860	4446995					3166630	419919	619271
UBA52	3.75709e+06	2.11177e+07	3.26173e+06	1.38271e+07	1.74321e+07	2.58085e+07	5.06739e+06	1.47857e+07	1.99961e+07	1.70147e+07	2.23525e+07	1.41053e+07	3.89934e+06	5.09779e+06	5.50071e+06	1.48701e+07	4.28238e+06	2.26762e+07	4.68985e+06	3.90787e+06
UBA6	229642	764889	123278	244019	180158	251079	180588	838404	128049	72331	355983		248820	213526	509932	268074	381691	594593	60012.7	858812
UBAP2L	1.19961e+06	1194349	1.59872e+07	1.81425e+06	3.16938e+06	1.90854e+06	317964	454395	1634915	2086973	1.64565e+06	1.89547e+06	1.63529e+06	2.42757e+06	1.75126e+06	1.51413e+06	431091	2.13769e+06	870126	1.12469e+06
UBB	3.75709e+06	2.11177e+07	3.26173e+06	1.38271e+07	1.74321e+07	2.58085e+07	5.06739e+06	1.47857e+07	1.99961e+07	1.70147e+07	2.23525e+07	1.41053e+07	3.89934e+06	5.09779e+06	5.50071e+06	1.48701e+07	4.28238e+06	2.26762e+07	4.68985e+06	3.90787e+06
UBC	3.75709e+06	2.11177e+07	3.26173e+06	1.38271e+07	1.74321e+07	2.58085e+07	5.06739e+06	1.47857e+07	1.99961e+07	1.70147e+07	2.23525e+07	1.41053e+07	3.89934e+06	5.09779e+06	5.50071e+06	1.48701e+07	4.28238e+06	2.26762e+07	4.68985e+06	3.90787e+06
UBE2L3	86177	132462	73100.5		86038.3	3.32256e+06	1.94735e+06	1.86088e+06	1.48186e+06	148255	9.5557e+07	2.39321e+06	5758950	62571.8			2.09742e+08		2186932	124236
UBE2L5	86177	132462	73100.5		86038.3	1.37906e+06	198063	131354	41880.6	148255	92107951	1.94832e+06	2089780	62571.8			2.09742e+08			124236
UBE2N	1.54467e+06	2.07084e+06	2.70314e+06	1435090	2.06462e+06	1956035		1.5272e+06	35198065	1.42104e+06	2.0327e+06	1879091	2338525	1395390	2317485	3.52991e+07	19341120	2.32599e+06	1.54976e+06	1.03277e+06
UBE2NL	1.54467e+06	2.07084e+06	2.70314e+06	1435090	2.06462e+06	1956035		1.5272e+06	1009165	1.42104e+06	2.0327e+06	1879091	2338525	1395390	2317485	495322	1604070	2.32599e+06	1.54976e+06	1.03277e+06
UBE2V2	1972570		36550									409034
UBE3A	2879565				2605964										2661312				1210190	1638435
UBE3C	785948					609364			482914					489732				1.22975e+06
UBE4A	830725	1279166	0		1.15504e+06					1844500	1267285		1.02658e+06		1191870	1.23772e+06	826755	1.15698e+06	1.04744e+06	837657
UBQLN1	306602			584272									30007					302310
UBR4	3.62462e+06	6303350	54917	8149665				6696500		8.76546e+06		7305230	5739240			7631635	5442650	0	4765895	8249650
UFD1	1.14693e+07	1.29271e+07	1.60945e+07	9754100	1.27541e+07	7.81457e+06	12056284	5475964	1.13727e+07	7.03763e+06		14039020	1.31946e+07	1.5768e+07	13299715	7366010	1.19971e+07	16365339	1.08661e+07	3909080
UGGT1	2.81613e+07	3.82322e+07	3.69362e+07	37075705	42364365	3.54904e+07	4.21902e+07	3.669e+07	4.07611e+07	41051590	3.117e+07	33195435	4.20507e+07	5.05427e+07	36163575	35982870	4.61421e+07	4.033e+07	3.46282e+07	3.81404e+07
UGGT2	19287400	27034740	2.46288e+07	26836805	3.0005e+07	2.00919e+07	2.88638e+07	24655200	2.84557e+07	30802390	1.97973e+07	2.46452e+07	2.72125e+07	3.62204e+07	26247375	26784700	3.50447e+07	27580950	2.80853e+07	2.41935e+07
UGP2	2.03669e+06	26403159	28319880	2.91067e+06	2.85344e+07	2.15565e+07	2.4498e+07	82130.5	738286	3.25167e+06	18029370	323346	23583690	23437310	25240222	1.86683e+06	216165	6.79379e+06	2.30352e+07	18555393
UMOD	147860		736399	366397	223808	307961		682177	349895	415522		332692		760784	110817	370057	603847	313770	0	1.20565e+06
UPF1	1400320			3607680		634818									1374970
USO1	6.21673e+06	13086406	1.40558e+07	131984	5.41036e+06	14700400	6978750		4950300	1.07071e+07	1.21652e+07	11350700	17559100	20400400	14729400	1.0066e+07	1.13982e+07	11813100	1.23452e+07	1.17567e+07
USP11	789012	989725	727829	569352	3840630	689882	807368	902720	665436	1.69144e+06	1.31968e+06	556228	501637	1.10084e+06	494930	576426	956102	978747	947909	516569
USP14	5.19582e+06	6.08706e+06	6.45873e+06	6.86097e+06	5.16505e+06	6.71052e+06	4.70665e+06	5.13119e+06	6.78856e+06	5.98051e+06	5059630	5.05753e+06	7.19914e+06	6.12857e+06	5.87308e+06	4.80285e+06	5449480	5.19557e+06	5.28345e+06	5.76498e+06
USP47	721112
USP7	1.00387e+07	1.20682e+07	2.01227e+06		5.74594e+06	1.61071e+07	1.79327e+06	5.92943e+06	2.29253e+06	7.62886e+06	1.07368e+07	1.53068e+07	1.2923e+07		1.2664e+07	5.84815e+06		2.03795e+06	17373149	1.27752e+07
VAMP5	18324050			31397400					32765650								21165566
VAMP7	3.06983e+06	1799085	2824180	2.21551e+06		1978880	3.15038e+06	4.28884e+06	2.29419e+06		2518860	3.39353e+06	3.10346e+06	2.67247e+06	3.49998e+06		1604643	1953490		2.37397e+06
VARS1	25839905	2.15896e+07		2.13138e+08	33521062	1.54213e+07	3.40866e+07	2.69352e+07	1.15776e+07	5.12172e+06	3.81983e+07	16653800	3.99391e+07		58878665		2.69502e+07	44203200	43448202	34693460
VASN	1.93543e+07	3.31556e+07	2.53523e+07	2.19122e+07	2.88347e+07	1.87351e+07	1.91367e+07	2.5779e+07	3.06578e+07	3.10977e+07	2.65425e+07	1.33749e+07	2.6893e+07	3.21971e+07	3.35165e+07	2.92322e+07	2.18558e+07	2.96129e+07	2.29453e+07	2.1429e+07
VASP	576820	325573	0	525306	745440	376502	381514	1377431	1283243	6.03998e+06	691585	229318	663573	653559	1.00836e+06	474700	1.2972e+06	2.18592e+06	231686	1.23817e+06
VCAM1	4543150		3.28119e+08	2.09246e+08	1.96714e+08	194464	4771480	2.52198e+06	2.05171e+08	1.05116e+07	2.80929e+08	7.11923e+06	1.96229e+08	9.02902e+06	2.07601e+06	7.00689e+06	724032	2.06094e+08	1.46256e+06	4.13047e+08
VCAN	2.14798e+06	41655.1	1023770	1.18554e+06	1.44528e+06	3.62839e+06	4540700	3.66007e+06	3.49049e+06	4.17702e+06	1.99175e+06	3.3002e+06	1046185	3.66596e+06	1608182		4.49369e+06	3.59167e+06	1.54347e+06	1948240
VCL	1.11327e+07	255775	1.87324e+06	2.85353e+06	2.19799e+06	820697	8.1788e+06	2.52666e+06	780901	2.90827e+07	214471	41537.7	6.62591e+06	2.03789e+06	502389	1.61544e+07	1.01045e+06	483943	7.05816e+06	756756
VCP	3.73298e+06	0		2.40324e+06	1.81631e+07	1.27403e+06	1.47686e+06	1.2493e+07	4.04804e+06	3.4608e+06	1.13488e+07	152063	940773	1.30432e+07	698637	8.20186e+06	9.3102e+06	1.84937e+07	2.43842e+06	1.35723e+07
VIM	3.11333e+07	3.03737e+07	934260	2.64064e+06	2.28182e+06	2.13873e+07	1177359	1.60437e+06	2.37466e+06	2.39458e+06	1.80106e+06	6.63688e+07	6.12649e+07	2.55542e+06	1.22995e+06	907011	6.45981e+07	1.65333e+07	5.65809e+07	1.21995e+06
VNN1	8.31258e+06	3.44097e+06	1.00479e+06	2.91078e+07	734713	1.01321e+07		5607729	303944	17456256	7085550		1.40316e+07	1.12464e+07		7540163	1.67962e+07	5.39881e+06	8.84491e+06	17563710
VNN3	252049	230332	232959			249886			303944	1295190			216302	186704		122825			248627
VPS11	3289412	3.7469e+06	3651850	3276348	4.1237e+06	5109185	5012010	4257175	5629002	6510870	5.40445e+06	2417515		5727932	3789330	5.17761e+06	5.63119e+06	4920594	3470668	5.83063e+06
VPS13C	36473367	90888609	38129300	234908	6.68029e+07		3.54762e+07	63121400		5.2342e+07	2069445	3.39986e+07	3.73498e+06	8.21377e+07	501371	7.61432e+07	38638750	77203935	8.17531e+06	197296
VPS18	4.62212e+06																		593005
VPS25	2786450	4727922	2700952	0	8207198	3.67831e+06		7.02606e+06	3.31979e+06	6.52958e+06	4.22523e+06	3.91325e+06	4.90228e+06	2408000	5.96331e+06	7.26709e+06	3.90501e+06	3.68013e+06		4.45089e+06
VPS33B	2874695															2054770	2005150	4.93621e+06
VPS35L	2.60988e+06	4.12032e+06	4.06724e+06	3.0059e+06	2135770	2578071	3.39699e+06	7274635	4.15641e+06	4.51205e+06	3.10107e+06	3.46168e+06		4.20129e+06		3.60378e+06	3.47932e+06	5444808	3.00328e+06	4.93493e+06
VPS4A	2900795				6982764	6782900			4.85034e+06	5.34022e+06	4876250		3.92217e+06				7635390	3748704	4931540	5.75205e+06
VPS51	598505	4003620							5.01285e+06								1.12308e+06
VRK3	183370
VSIG4	332092	415170	267216		206132		38396.2	760050	148135				228366	721729	410794	530202	271681	209618	93187.6
VTN	9.51903e+08	5.21205e+08	5.57652e+08	6.66246e+08	5.55162e+08	4.51559e+08	4.81438e+08	6.87519e+08	1.13244e+09	1.63212e+09	6.38923e+08	1.35123e+09	1.43149e+09	5.76892e+08	7.24152e+08	6.38045e+08	6.42204e+08	5.37392e+08	5.82137e+08	4.96867e+08
VWA5A	890019			207614							636059	572700	1.03136e+06
VWF	1.19013e+07	1.76899e+07	3.00972e+07	7.85388e+06	5.72719e+06	9.12894e+06	7.00581e+06	7.41954e+06	4.34874e+06	1.03651e+07	2.57942e+07	2.55935e+07	1.12208e+07	3.47099e+07	2.03181e+07	2.8004e+07	7.11585e+06	1.36439e+07	6.87742e+06	1.35192e+07
WARS1	2.95048e+06		2680740	2.97659e+06	3.86244e+06		4544955	3.60602e+06		5078600	3.32916e+06	2755575	2.12372e+06	3.86767e+06	4.42081e+06	3.15111e+06	3.20471e+06	3.46346e+06	3.18545e+06	3.38429e+06
WDR11	3493080	2577160	5501850
WDR12	1779475	1739898		974610	1080262	1138850		2469880	1.7009e+06	1.42892e+06	1.78648e+06	1.58786e+06		1.83563e+06	1239085			1.964e+06	934618	1191015
WDR26	56740				316200			209075									269286	301933
WDR7	1.11056e+07	21072300	25342600	9.59733e+06	21883800	13715535	1.72051e+07	1.68996e+07	1.76733e+07	1.52833e+07	4491016	11851187	6.21513e+06	22601400	1.80451e+07	11157700	20011600	1.84659e+07	13353600	19969663
WDR81	503827						46034.4		73180	124985	24965.3				286540				85905.6	519176
XRCC3	1763635			936067					1789165	0	0			742939		1264579
XRCC6	51220000	8.20491e+07		3.98497e+07			2739960	1.48393e+06		2289565	2034232			1675812	0		1724097			154756
YWHAB	1.1984e+07	1.76226e+07	1.92717e+07	3.32844e+06	5.68615e+06	4.49497e+06	1.22961e+07	1.51368e+07	1.1498e+07	7.64782e+07	1.51265e+07	1.24695e+07	7.30519e+07	1.16319e+07	6.80152e+06	6.74675e+06	2.0649e+07	1.21134e+07	9.85009e+06	1.66989e+07
YWHAE	2.19144e+07	2.26998e+07	2.11552e+07	4.23938e+06	5.21435e+07	3.18738e+07	2.32829e+07	5.85041e+06	5.594e+06	2.6931e+07	5.38568e+06	4.12789e+06	4.35586e+06	1.73008e+07	4.52212e+07	5.4097e+06	1.42939e+07	1.73743e+07	5.07166e+07	6.14299e+06
YWHAG	2.56227e+06	3.54639e+06	1.7288e+06	8.23276e+06	2.10494e+06	2.61874e+06	3.41391e+06	1.08828e+06	5.36046e+06	2.96898e+06	1.32439e+06	3.33531e+06	2.14119e+06	2.10964e+06	6.00883e+06	8.42812e+06	2.22611e+06	3.1397e+06	2.36074e+06	3.25625e+06
YWHAH	5.27942e+06	1.1948e+06	1.29126e+06	1.16594e+06	886458	1.01645e+06	1.35261e+06	1.08828e+06	1.01825e+06	1.10835e+06	1.32439e+06	1.13986e+06	1.08709e+06	1.27064e+06	1.08399e+06	2.94451e+06	1.17383e+06	1.20984e+06	1.43507e+06	1.21407e+06
YWHAQ	1.2822e+06	1.1948e+06	1.29126e+06	2.08111e+06	886458	1.11839e+06	1.35261e+06	3.32062e+06	1.01825e+06	5.77046e+06	1.32439e+06	1.13986e+06	1.08709e+06	1.27064e+06	1.1604e+06	1.0683e+06	1.17383e+06	1.20984e+06	1.07851e+06	1.21407e+06
YWHAZ	2.10748e+06	1.26692e+06	7.25403e+06	1.64119e+06	1.18074e+06	1.11162e+07	1.49896e+07	2.0537e+07	1.64155e+07	4.10549e+06	1.32439e+06	6.05131e+08	1.59399e+07	1.72617e+07	1.73622e+07	1.43598e+06	3.21266e+07	1.3421e+06	4.76344e+06	2.98725e+07
ZBTB20	564790			529235	903576	733613		506131							681204		879262	217978
ZBTB45	167152
ZC3HAV1	19903815		16662150			6797450	6278200	1.14168e+07	1.57313e+07	1.69559e+07	7.50127e+06	5888850	13484650	14834000	8.01979e+06	1.42463e+07	14920750	7151900	7488980
ZCCHC8	212877850													1892950
ZCRB1	4277960	3.67073e+06	2399090	3238190	3759615	1.45753e+06	4189125	3.44266e+06	3.62026e+06	2107890	2.73009e+06	1.75844e+06		3585360	2275425	3957580	3850950	3725795	4089670
ZFYVE19	1.8847e+08	1.99349e+08	2.07954e+08	243258225	2.21428e+08	2.13667e+08	1.66927e+08	2.13088e+08	221809625	249533600	2.21807e+08	2.07292e+08	211408600	244449800	2.29429e+08	244539125	2.17598e+08	2.22446e+08	2.1124e+08	2.45767e+08
ZG16B	0	976840				1639210				1.65634e+06		710564
ZNF512B	171459																		4.92792e+06
ZW10	3276740		8961170		4530856			9127430								769570		8562789
ZYX	113253	485425			337511		114691		115420	199544	301094		492591	202315	222921			214854
A1CF		486185
AAK1		147008	204035	552473			478320				332421	416569			410724		491202		539996
ABLIM1		40465.1																394377
ACADVL		35986550	247756																3.52017e+07
ACOT7		1.58172e+06
ACOX2		46710.7
ACSF2		527082	289462	1.33847e+06		580660	361568	132905		359468	0		609238		648226			714921	402467
ACSL3		3.7567e+07			1.03139e+06	23216440		198475		20230695	4.33648e+07	1.3166e+06	3354240		2330985	4.5421e+07			82851
ACTN3		38769.2			838638		10088.6									385229
ACTR10		2.23273e+08	1.23563e+06	1.69735e+08	1.01808e+06		1.51242e+06		1.30892e+06	574104	2079120	1291295	3.01456e+08		6.34458e+07		1.22215e+06	2.43457e+08	2.01694e+08	869960
ACTR1B		598525		40349100	3.36612e+07	3.67147e+07	1497030	2.88417e+07	30968820	2.50614e+07	100066000	2.32755e+07	29685450	3.5205e+07	2.88178e+07	3.49386e+07	15497200	27234200	55817710	2.67682e+07
ADA		134871000							122021500
ADAMTSL1		1.20578e+06
ADAR		5.70048e+07		1.16038e+07	7136705				5716650	10672550			1632405		12466350	4321580	8.59622e+06	13293780		1603080
ADARB1		2125085	1162355	746860	1.0695e+06		1002140	1092280		1197360	1025314		984640	1837080	850217	1.79161e+06	1119120	1260565	1.28194e+06	1082900
ADCK5		226351					0													491541
ADD1		536370		967380												1.82222e+06
ADD3		94632.3				333755		514178			1212815						346737			232856
ADH1C		8699480	3.33008e+06		8.65393e+06	6.22589e+06	6203750	2.14802e+06	2.57457e+06	5.54873e+06	3.49842e+06		7811525	3.78761e+06	7.93743e+06	4.10753e+06		4.95141e+06	6.35987e+06	6.70113e+06
ADH4		532122				358043				774259			734142			962685		1381225	1082370
ADSS2		208303	37053.5	14436.6
AGO1		370468	0		417780			332497	328157			48165.8				293118	375566	336837
AGO2		1.19905e+06				2031490					572967				955765	1218865	1.07863e+06		1.15484e+06
AGO3		1.19905e+06				2031490					572967				955765	1218865	1.07863e+06		1082860
AGO4		370468	0		417780			332497	328157			48165.8				293118	375566	336837
AGR2		1.16919e+07		502668			1717095				2634955	2480770	273159		1.74312e+06	3.12408e+06	1.4788e+06	456733	3351200	3.61292e+06
AGR3		1203160			2.49849e+06	1.33759e+06		1.85689e+06	406927	2216455				2813600			1453320		1543870
AK4		1553693	936118	2805300						802334900	1.94765e+06		8723.75
AKAP12		376358	178493000	97375055	462781	477822		156493	386581	381440					272629		362346	501383		1195285
ALDH18A1		961222		4.68491e+06	604760	563634		445312			1.51797e+06	122649					650884			516360
ALDH6A1		15539400			249729	2.79276e+07		1.02759e+07		22615750								86717.5
ALDOC		30615.9				427265	279036	812767	605738	464255			9.31136e+06		865116		649045	420198	321411
AMY1A		2.62716e+06	567180	878790			1.12177e+06		731232	0	8.26457e+06	3.31944e+06		28989.5	4.66311e+06	1.14087e+06	1.51453e+06		1.29179e+06	0
AMY2A		2.62716e+06	567180	878790			1.12177e+06		731232	0	8.26457e+06	3.31944e+06		28989.5	4.66311e+06	1.14087e+06	1.51453e+06		1.29179e+06	0
AMY2B		2.62716e+06	567180	878790			1.12177e+06		731232	0	8.26457e+06	3.31944e+06		28989.5	4.66311e+06	1.14087e+06	1.51453e+06		1.29179e+06	0
ANGPTL2		146234
ANKS1A		45460900																	0
ANO6		157860	1.6359e+07							7969350
ANXA2P2		1.54151e+06		1602279								1427705					37617.6
ANXA4		3899305				3.83684e+06
ANXA5		1302020		2.78562e+06		3057884	8.52705e+07		1.34891e+06	9322355	1.69954e+06		794113				1343745	16441600	2614558
ANXA7		271250	413689		325099	0	264756	195931	380555	207455	967358			0	451353	316092	759285	384522	238971	227656
AOC2		35372.2	8651.05	44079.5		9745.56		17956.2	0	8307.4										0
APBB1IP		1.04566e+06	1769165						1.37267e+06	714357	3889750					511817	1585100			2018965
APEH		879967				0						1003544	3.29467e+06		59410.1
APLP1		30697600	441170	15943300	0		13397950	15896150	665246	3.54822e+07	30225012	22955100	3.01618e+07	1.71748e+07	2.76017e+07	16342624	29052700	1.68269e+07	2.01593e+06	3.24162e+07
APOA5		127485		27600.4		39085.1		39736.6	150980								56085.2
ARHGAP1		1544435		3908480					845880	2033650	1388985					1423595	1699240
ARHGAP19		7996020
ARHGAP4		819245		1313005
ARHGDIA		696800	5.66536e+08	542640000	756940			569126280	360522		529852	560930000	2.73389e+08		5.98446e+08	812518	5.43835e+08	4.52145e+06	282325900	589145000
ARHGEF1		630695								6861800				762086
ARL2		2423820	4651136	4984910	4.40806e+06	3304215	3.97269e+06	3.79057e+06	3.36213e+06	3818050		2374330	3770930	1713460	0	2264560	5030430	2680945	3323645	5.07803e+06
ARL6IP5		5.84579e+06				5711625			5272450			5381400	10403600		10407130					0
ARPC2		2.0578e+07		0	2194050		174002	535997			505010	19860900	467988	437600	931860	342398	2.56558e+07		9983900	880083
ARPC3		0									1.7706e+06	1113010				1.03566e+06
ARSA		66977	235168	132904								294626	1156850		519971		878478	765508
ART3		848633									7.80658e+06		0
ASAH1		1.47636e+06	165472	688906	1.90274e+06	84335.9	1133015	823827	352310	0	8.61251e+06	1.38911e+06	1.7324e+06	1018487	1.54781e+06	770879	622707	1.77591e+06	312528	613096
ASMTL		729405			994644	281656		1301792				587870		979712						596852
ATG16L1		876293								5.27364e+06		6204315
ATP13A1		42122306	3.36673e+06	640162						366863	1332140	2716510	191430			2660399		2.60635e+06	711976	1162900
ATP1A1		726992	793686	215218	952980	85964.8		530061	729926		4.05539e+06		421462	240038	678034	31044.2		647383
ATP1A2		726992	793686	49202.1	818147	85964.8		530061	729926		4.05539e+06			240038	548921	31044.2		647383	5312900
ATP1A3		726992	1.00503e+06	215218	818147	85964.8		530061	729926		4.05539e+06			240038	678034	31044.2		647383	5312900
ATP4A		726992	793686		754842			530061	729926		57679.2			240038	548921	31044.2		569511
ATP6V0C		214335		220317										244440				0		94602.4
ATP6V1B2		16110500	586840	17036100	1.01241e+07	16048650			1.85577e+07			945975		8185030	38403.6	508194	18922900		20326800
ATP8B1		482643									253253
ATXN2L		0	2.75357e+08	2.60305e+08	331059400	312990000	307298500	2.72908e+08	2.2912e+08	114143500	3.00964e+08				2.58197e+08		2.49415e+08	233770600		296810125
AZU1		628314	2.00385e+06		1494415		7.0125e+06						3.39797e+06			555265
BAG3		2421620
BCL2L1		63982				1529313				1.39795e+06			309180
BCL2L11		660810
BCS1L		2.98535e+06	3.95891e+06	1998460	5.13262e+06	4576200	2.89331e+06	2941174	2821719	3.97225e+06	1.38097e+06	3126612		3.88524e+06	162984	4128900	4.21498e+06	3.19991e+06	4.77995e+06	4.54349e+06
BGN		12573300	11564260	195654	1759270	41368350	4987160	11299800		9.76293e+06		22458715			5494120		3.65325e+07		3.32869e+07	4.85629e+07
BRIX1		333828	1.51896e+06													948364	1.1924e+06	1076281		2369800
C9orf64		112086	1562705	3.47988e+06	4.18763e+06	2133639	717078		4.03031e+06	2940150	744523	317503	2.71259e+06	1.91032e+06	3.73e+06	2.78342e+06	3.54276e+06	4.22979e+06	2315515	3.06392e+06
CACNA2D2		2.53712e+06	770142	6.53272e+06	3.41287e+06	1.6095e+06		4.4969e+06	3147980	1.95525e+06	1.82609e+06	1.51787e+06	2.03729e+06		3.34903e+06	1.37318e+06	1.34425e+06	3.28554e+06	2.59207e+06	2.19187e+06
CAMK2D		351727		1521620	3.52533e+06	519405	2.24211e+06		1.27856e+06		1.44448e+06	1685734	1.22105e+06	974180	1.69488e+06	2.56201e+06			1.60708e+06
CAMSAP1		1542250
CAPN5		18863850			154671
CAPS		285934		13347100										12028650
CAPZB		1629040	774904	0	1.59734e+06		869154	2294612	853888		1053100			302138	2560575	0			2.46287e+06
CBR3		100299000	62395100						96093700	193672	92289600	4.03174e+07				60008200				92736.5
CBX5		159226			101789														41411.5
CCAR2		787232		909354		1.27849e+06		624543	764600						1016080	823158		829257	730146	766002
CD99		104772															143326	85174
CDK7		57668.7
CDKN2A		1.07111e+06												1.47342e+06					171948
CEACAM6		161540	88433.5			207570	85218.5		127814			55384.3				54031.5				132425
CEPT1		3777530			2.86522e+06										2979685
CES3		90755.7		525917	552758	318636			927460	847660								1.03764e+06
CHD4		125465				176442					294638	1730540		2.60363e+06					4229265
CHGB		104133	20918.3		28483.7	24537.8		63154.8		97052.8				90927.8	87204.1				158355	105406
CHI3L1		1529162	240136	126389		2.3272e+06	164077	405554	1.91093e+06	8670680		1.14185e+06	1568900		0				8.68366e+06	1.25287e+06
CISD1		450126					149506		0	698282		138696							368065
CKAP5		166603		511220					344650		402420	1631320		8748100
CLUH		681209		717854	579725	1.91931e+06		0				771243			19790.6				1.02877e+06
CMBL		1626725		4338430		4954660	1.16191e+06		5492740		3.85837e+06						265947
CNPY2		329625
COA3		3892795									6914350	10126735					32176400		4.59721e+06
COG1		622798
COL7A1		447212		13180.9							1918200
COPA		2.49882e+06				4802810	2153630			2269738					568288	115731	5757995
COPB2		6333445				2572260		4345670		3.09192e+06	7338580			4415875				4502405	5344385	0
COPS4		364573				420329				0					582486	596290			460052
CORO1A		1.09806e+06				549907	1.12261e+06			0			2.15746e+06		1404550			1.25591e+06	1563867	1.20807e+06
CORO1C		208137			1233645			2230195			2058888									3572845
COX6A1		868196		618978						689393							786959			855447
CPE		119210						158996			676135
CPNE2		1040990	2.20283e+06	1127670				901895				1.20139e+06		1.3182e+06		1273970	1838680	1192420	5161175	1410670
CRYM		271458			927948	1.56762e+06			1.09114e+06
CSN3		1528080	9.72067e+06			21498300					121560	4120270						3706920
CST4		1.37584e+06					668850	1312020		1.62368e+06		1088745		2855750	2.08104e+06			2635730
CTNNA1		438030	2.21549e+06		2.37589e+06	3.98328e+06	483668	2191625				1489920	2.50927e+06	4455145		5.72911e+06	1.9764e+06	1.97361e+06	21313545
CTSB		331893	455231		413787	253971	540582			218329	388551						6509490	587933	1.5836e+06	5.73441e+06
CTSH		16436300						268104			1.1044e+07		756720	0			19151250	5.93158e+06
CTSZ		622503			1916285		1995450						1842700		645477		1.01069e+06	436178		1525167
CTU2		1.71314e+06				3.31363e+06		631222					1.16858e+06		168236	1613820				1941118
CUL3		505256				922130								4713885	0			79231.5
CYB5B		170025
CYBB		178205	774429		164110				0		278761	50913
CYC1		1.77417e+06
CYCS		1.28747e+07									1617185				5055640
CYFIP1		2.49966e+06	19380300	18640490		1352496			1.1767e+07	1.90394e+07	0	2.50658e+06	669842	10500800	36561191	3.12898e+07	9.80493e+06	26125600	16404400	1.89436e+07
CYP51A1		1595200										2195090			53296.2	1086055	764860
DBNL		6814850					1.15482e+07	9.17784e+06		7450300			7.11822e+06		14131700				7068800
DCTPP1		2498860
DDX24		28533.3
DDX39A		1.27315e+06	654395	1.51766e+06			1666225					1348655					952828		1.67379e+06
DDX39B		1.27315e+06	654395														952828
DDX42		2.08613e+07	933295	1.70081e+06	7.57875e+06	6.4525e+06	774882	537544	6981975	3658630	4.33384e+06			9.28077e+06	8841750	678341	942706	0	5199260	984007
DDX59		5606950		4.48993e+06						6436600						12766800
DECR1		183114415	3.54592e+07	24597270	1.20849e+08	267931500	271877000	147702450		1.09995e+08		1.03165e+08	2.09882e+08	133166500				1.991e+08	169872775	1.89516e+08
DEK		2.60605e+06	1.08552e+06			8386635								1190143						3103460
DERPC		8393035						9351485
DES		3905990		95320.2	251324						2421270					1474145			33453.2
DESI2		7988300	17122025				2.22384e+07											1.91815e+07
DHX29		3.58273e+06	3234930					3514616	0					4946180			3560220			3515540
DHX9		1088899				1.4596e+06	1918435	8358962	1133181	558415		1.81628e+06		1735020				1.35843e+07
DLST		7472500													23295200			13998300
DMD		1610940								475783								374748
DMGDH		4.618e+06	4891335		3044770	2304240	3850760	6.59888e+06	5928390	6909770	4201040	4.33226e+06				4.44501e+06	5369066	4.89693e+06	2839865
DNAJC10		7396800				11609340			467901		9487640			0	14729750	13415100		9693660
DOCK9		1.44169e+07						4463650	4.888e+06				6311140	25496875	24542250	30527500	25973400	7.67731e+06
DOK3		66519.5			10793100			7382300
DPEP1		7322400		8813175	6091800	5780900		7.35549e+06		6560150		5047600			8.20548e+06		5480550	6395100		4979820
DPH5		572278		399165	81611.1					621311		67652.2
DPP3		2.26355e+06		1.86745e+06	322874	1.29665e+06	2.57775e+06	3.68211e+06	559680	1.25054e+07	5.68432e+06	3116055	1.57318e+07	1734260	2.74987e+06	1.32097e+06	5.7757e+06	5.324e+06	4.73928e+06	5697950
DPP4		914847			907051	0	759800	1.27499e+06	87760	2164160	3907280		1.13738e+06		1.11169e+06	187302	1282610			1.04217e+06
DPYSL5		2219415				1516795	2534540						1805741
DRG2		411698		3747435		3133720	2.03822e+06	0			11446650	1.70883e+07	22768100	1224292	26224450	13927650	18600400		18797300	4.52023e+07
DSC3		162028						378968	338550	545275	115267		2552650	839892	90171.5				268227
DSG2		458819					457643					183699			0		486355
DYNLL1		478075	498614	415623	672330		437614		351944			550269				590081	459231	482506	264623
DYNLL2		478075	498614	415623	672330		437614		351944			550269				590081	459231	482506	264623
DYSF		6.83297e+06	7751425		7481080	35348090		37999400		3998365		5239900	6.71258e+06	6908330	8230000	7157470	8.61891e+06	45531628		43427400
ECPAS		532919	79323.1				2354970	292880
EFHD2		68375.1						51919100
EFTUD2		1759144				5.79184e+06				667600	1402635	2.24289e+06		1270490			779416	1702245		6473350
EHD1		4.60484e+06	782290	9599055	8.60968e+06	578482	391032		6671215			324312	11887025	13532875	7.64336e+06			9.52827e+06	8.61371e+06	5.20706e+06
EHD3		611108	782290	660405	586135	578482	151973	7111880				324312		0	806664		1.01245e+06	821538	2983125	828091
EHD4		611108	782290	660405	586135	872202	151973					324312		529144	806664			1.35776e+06	610542	1.00665e+06
EIF2A		4168085	2163942		1.66287e+07									8259900	2.3545e+06		16115900	0
EIF4B		317880								129659
ELANE		3242720					48782.9													36867.4
ELOC		9736050	8.33767e+06	4.98641e+07	5.26677e+06	12924410	13745700	42426100	38816650		6271250	18402350	15416500			2.51318e+07	27374425	1.78948e+07	6.72998e+06	5293600
EMC8		8531790
EML1		1.34991e+06	2638440		3630775					1041621						3.82371e+06		1975115	1557515	1993330
ENDOD1		20120506		22278307		17337400	700318	15372700	14614900		13087400	99446.5	760104	20816800	15773950	433152	2.77415e+07	2.96067e+07	2.87664e+07
EPB41L2		7.71184e+06		2088595					8289400		832468					12847795
EPHB4		486882
EPN1		614130				1.22656e+06										1.0251e+06
ERI3		1431625														2467045			1040810
ETFA		22230450	1.91132e+07			2184425	1315264	1.42714e+07		978534		2509340	152155	458692				1.09301e+07	2.60686e+06
ETFB		4.06832e+06			597395		38222.1	1425630	1308940				632475		919210
ETHE1		241826			182534			306384											532242
EXOSC9		692259			1217420
F11R		255454	397438								118272							161774
FAHD1		625068			2.04036e+07	611855	648890		603705	11587100						817775		866670		321339
FAM98A		3.08712e+06			3403050													3115140		159390
FAP		1521350							355745
FAT2		15517000		12847850			11841300	12584400			15399700				15876200	13080350			11049700
FGL1		32170700		20868741							5687500	25471070		18757900		0	33633500			16700100
FMOD		242944										310005	0	7152400					4.21606e+06	7393520
FNTB		349990			689299										402755					176486
FOLH1		283660		1250850										1044700
FOLH1B		283660		1250850										1044700
FPGT		1453970			1746760	330248			1103938		915392			422140		3280615	918422		1093635	1.27627e+06
FXR2		3911240									3079695						4.99769e+06
GALK2		1.21167e+08	6.89766e+07					2.62987e+08	128796046
GAR1		11043300	422942					1732380			715668			1979745					1030830
GBE1		1.20172e+06	505364	1638343	1.16657e+06	194928	732270	0			604924		0	1.11328e+06			780320
GBP2		964712							805803				385676			967022	2889125	1.4379e+06
GFPT1		2633230	0	4393915	9852560		6209300		4992920	4270552	9525180	7.14698e+06	6384438	784017		3218216	7.3877e+06	5.39394e+06	3.53941e+06
GK		8482850	8582550			4346555		1.22822e+07	9557500	8.86978e+06		1518150			11945180	8729250		8573100	7234400
GK3P		8482850	8582550			4346555		1.22822e+07	9557500	8.86978e+06		1518150			11945180	8729250		8573100	7234400
GLIPR2		6332290										32121350				43327.7	51303.5
GMPPB		1.7641e+07		5.59458e+06		0	3794595	6.25023e+06	4213705	0	4795035	7570310	27732005	304321	1.79785e+07		4996000	21368300	0	9.80898e+06
GNA13		1.79969e+07		9.92037e+06		17656700	17475550		1.51481e+07	20699140	18395400				21602800		1.42514e+07	5876300	2.05223e+07
GNB1L		5.44508e+06
GNE		1.45241e+06	3.32723e+06	1.24501e+06	889418	2678320	624457			2.06365e+06		1745380		1.06272e+06	1653335		0	1.07255e+06	1.11675e+06	0
GOSR1		76258.7									289218
GP6		3934210			3538275							3895710			4365660	3920500		7.50127e+06	7554500	3929650
GPD1		2.44662e+06	295647			369716			712062						907158					651394
GPR180		1.03417e+06									3.44573e+06		171644			1.32504e+06
GPRC5C		3113885				9547400
GPX2		1632350																		682958
GRB14		159781
GSDMB		2791690	6169870	3.55065e+06		6710620			1.39557e+06				2297358		2.60399e+06		3609090	6194250	3381140	6892510
GSK3B		5855000	7437450			20109000	14798840	12033400	15053250		19433950	13424900	0	2.00842e+07	1.80836e+07	10942850	6763350	2.2134e+07
GSS		1691470		1640330	5.27408e+06	5.69497e+06	6948620	1810250	795255	8.11745e+06	4.33046e+06	264293	9464765					9.98627e+06	155824	1.11323e+07
GTF3C4		2549630	5862010		219617		1331575							156306				3137800
H1-1		123438	177518		87071.8	109380		179391					96812.8	22193.8		89095.4		27763.5
H1-2		123438	177518		87071.8	109380		179391					96812.8	22193.8		89095.4		27763.5
H1-3		123438	177518		87071.8	109380	62434.2	179391					96812.8	22193.8		89095.4		27763.5
H1-4		123438	177518		87071.8	109380		179391					96812.8	22193.8		89095.4		27763.5
H1-6		123438	177518		87071.8	109380		179391					96812.8	22193.8		89095.4		27763.5
HAAO		3894000	4.17276e+06					5593810	2394305	5474010	1594620	4.04052e+06	4130940		1552325	2.94975e+06	3.83675e+06	5756470	4.69756e+06	5712960
HADHA		960462	4.30763e+07	265549	5.66234e+06	962575	3642405	0							28819400	541184		3101750
HAGH		13971060	11168300		6216400			0	5104600			268890								10482900
HAPLN4		128517					252687
HAUS5		1197640								1190470
HAUS6		409117
HBQ1		17056300															35891900		17543100
HCFC1		13314500
HDGFL1		161683
HDHD3		2.19498e+07					8041200		3182768			9559400		6.38851e+06	3580780		46064080
HDLBP		9.75013e+06	13330430	1010740	1.04041e+07	3.23691e+06				1.31195e+07		1.12641e+07		7582300	273271	8688652	13730300	7725539	1.00277e+07
HEG1		1104700							557135								78570.5
HEXA		49803																	2908455
HGH1		173757					27224875							229216
HIBCH		654055		309525				400821									524076
HIGD2A		1896770
HLA-B		116302	230434	28572.9	48704	59892.7	204981	44313.9			31256.7	26019.7			64994.7	64018.8	78872.7	364055	211727	30221
HLA-E		116302	63537.1	28572.9	48704	59892.7	32521.9	44313.9			31256.7	26019.7			64994.7	64018.8	78872.7	364055	55822.8	30221
HMGA1		434641	450717	337335		630798		599775	334311		288245		634841				588993			527491
HNRNPA1		0	4257225	4155480		1603622				1.38129e+07			1.86367e+06	1.32445e+06			571118		2.28652e+06
HNRNPA3		812673			14264.1		850071	1.06064e+06	995790	20954.3		591411			1964770		1644077	717217	1.00496e+06
HNRNPH2		430620		481367				920465	400914	113543	203761		206884	227692	491817		1.82075e+06		303527	122986
HNRNPH3		367011									607385	201401
HNRNPL		4.37534e+06	5219820	5115773			5422435	5.0787e+06	3.93253e+06	10808675	395624	0	3.70599e+06	3963955		2557533	3604297	287952	5345590	3237996
HNRNPUL1		0				4247870	1.56848e+06	3940620	0	5354890		3.27546e+06		4929900		3592795	6.20744e+06			4523350
HSP90AA1		240104	224116	1.6033e+06	80347	22503.2	51594.3	683449	2.66013e+06	570084	531614	575912	620802	1.50234e+06	882995	1.08862e+06	3.60676e+06	381013	1.26836e+06	267027
HSP90AA2P		124622				22503.2	51594.3							611023				296773	194936
HSP90AB2P		819330					652148		864170	964818	208606		961373	1.12386e+06			1.66232e+06	296773
HSP90AB3P		934813	224116	199400	80347		652148	122974	1.34886e+06	1.02275e+06	740220	272870	961373	677043		256773	1.66232e+06	84239.9		267027
HSP90AB4P		115483	224116	199400	80347		0	122974	484688	57928.6	531614	272870		141056		256773	656250	84239.9		267027
HSPA13		53469250			77378900					36930650
HSPA4		325425				453480			4432120
HTT		2768370				202892								404402				17323850
IFI16		154912								244288
IGFBP5		344634												144689				115334	161230	139882
IGHE		37374	45882.8		88974.7	47052		53038.7	58062.5	15902.1			91335	44874.2
INF2		275354		469063						1.23017e+06	334467				434366	391569	256346		1767621
INHBC		59530.5			59036.1												54796.5
IPO5		2438535									2209745								1305515
[truncated: 2,463 more rows]

## Sheet: 5.Protein_Matrix_STAVER
Gene_Symbol	Exp000000_DingC_PooledQC_DIA_14_HFX5_10min_8cm_2per_20210617_F1_R1	Exp000000_DingC_PooledQC_DIA_9_HFX5_10min_8cm_2per_20210617_F1_R1	Exp000000_DingC_PooledQC_DIA_17_HFX5_10min_8cm_2per_20210617_F1_R1	Exp000000_DingC_PooledQC_DIA_3_HFX5_10min_8cm_2per_20210617_F1_R1	Exp000000_DingC_PooledQC_DIA_19_HFX5_10min_8cm_2per_20210617_F1_R1	Exp000000_DingC_PooledQC_DIA_7_HFX5_10min_8cm_2per_20210617_F1_R1	Exp000000_DingC_PooledQC_DIA_1_HFX5_10min_8cm_2per_20210617_F1_R1	Exp000000_DingC_PooledQC_DIA_5_HFX5_10min_8cm_2per_20210617_F1_R1	Exp000000_DingC_PooledQC_DIA_2_HFX5_10min_8cm_2per_20210617_F1_R1	Exp000000_DingC_PooledQC_DIA_4_HFX5_10min_8cm_2per_20210617_F1_R1	Exp000000_DingC_PooledQC_DIA_12_HFX5_10min_8cm_2per_20210617_F1_R1	Exp000000_DingC_PooledQC_DIA_11_HFX5_10min_8cm_2per_20210617_F1_R1	Exp000000_DingC_PooledQC_DIA_10_HFX5_10min_8cm_2per_20210617_F1_R1	Exp000000_DingC_PooledQC_DIA_20_HFX5_10min_8cm_2per_20210617_F1_R1	Exp000000_DingC_PooledQC_DIA_8_HFX5_10min_8cm_2per_20210617_F1_R1	Exp000000_DingC_PooledQC_DIA_13_HFX5_10min_8cm_2per_20210617_F1_R1	Exp000000_DingC_PooledQC_DIA_16_HFX5_10min_8cm_2per_20210617_F1_R1	Exp000000_DingC_PooledQC_DIA_6_HFX5_10min_8cm_2per_20210617_F1_R1	Exp000000_DingC_PooledQC_DIA_18_HFX5_10min_8cm_2per_20210617_F1_R1	Exp000000_DingC_PooledQC_DIA_15_HFX5_10min_8cm_2per_20210617_F1_R1
A1BG	9567700	11279667	12252933	9213270	11358800	10135473	7454020	9951040	9500240	10899500	10657300	11195300	12066400	9974560	10976900	10055000	11034100	10271600	11373900	10690500
HPR	12033100	11321600	10803500	8662690	11203300	10165040	8115780	10581730	9891100	11756000	8975697	11608267	10989500	11157533	10652333	9858603	10624027	11832533	11818833	8513630
STRIP1	1027760	1.02946e+06	1.04312e+06	652444	994805	885113	0	841202	806542	189797	852469	912845	391430	975122	121648	1005430	865122	797769	1222160	924466
HELZ2	968333	2.31195e+06	3096470	2.47903e+06	3145820	2020270	2326840	2.52064e+06	3060320	2933460	1.98897e+06	691767	3227290	0	3316660	1946660	3029300	2.17227e+06	1.02165e+06	3237890
HES7	20816334	19441600	22620434	9226993	21218866	17974634	14796700	14848233	13166433	22163600	10029500	21852800	23235400	20465700	19805700	14209467	22350200	21749800	22118966	10973600
PI16	489202	351914	363566	328144	356049	413013	421278	323566	340395	349301	480015	357098	354610	422061	459788	462692	337864	518351	425688	338271
HGFAC	1779190	1433200	1.40675e+06	1550600	1.0037e+06	2140510	1041280	1465600	1.20572e+06	1652320	1364010	1333950	1391280	1161730	1489060	1496290	1333150	1.78838e+06	1167170	1257280
PGLYRP2	3520540	2931790	3176950	3051790	3121010	3121440	2618760	2990160	2993400	2715170	2685150	3149890	2590720	3018300	3303120	3005910	3132520	3446200	2943940	3152990
COL12A1	21771000	20603900	22222900	19420600	19641100	19298100	18644500	20319700	19753700	19721700	18652200	20020600	20710900	20037600	19869900	19604500	18659800	19976900	20594000	21399700
PGD	1455300	1166060	1039060	958909	1205780	1192390	1090410	1251990	976963	1184530	1241370	1512250	1368450	1055170	1378310	1231770	1179880	1337050	1097580	1292740
PEBP1	19026300	0	0	0	0	19362100	15575400	5.33763e+06	17656234	17400900	17353900	16988900	0	12994200	12804067	0	0	18273300	13055200	14126200
PDZK1IP1	3384230	5071750	4441620	3454120	3805240	0	4.18216e+06	4471180	5.91157e+06	2492150	3750480	3947120	0	0	3668730	5401540	4368430	4057600	5571870	4551540
STXBP5	23686800	44188500	46942200	39773300	45884300	40517100	39706900	22300000	44927500	42929500	38997000	44772800	47370700	42320000	40442800	37893700	38005200	46005000	22455600	18472900
HNRNPU	16714500	24523600	17889300	17776700	13536000	18816800	13598400	19518300	21763100	20994300	21456700	24557900	0	11538900	14419200	20693400	18843200	16720600	25075200	0
PDGFRB	16017100	16733300	17701500	20675200	22787500	15093800	14852700	5318280	14437000	6106010	20743500	18078800	17062000	17844100	15240100	15729000	15991200	15780900	20113000	16117900
COL6A3	7402480	6966400	7.09142e+06	3100360	7783920	6590240	5.54639e+06	2542820	6.70474e+06	7307360	6.65759e+06	7175050	8149150	2.04673e+06	2349390	4288750	6.25447e+06	5832950	7.2434e+06	297159
CNDP1	1417765	1020215	1141985	1.0376e+06	1162300	1103105	945782	928838	1.17345e+06	1.08591e+06	1213990	1285615	1362170	1194710	1329755	1.02972e+06	1172020	1011943	1355315	1147935
SUCLG2	53936230	43377200	52767100	47300532	40388830	46049000	45836800	46439600	44937700	37218570	38583830	41077700	33198934	47246000	37978400	35559900	51565500	35956000	38471900	46760932
CMBL	19794900	20783200	15544800	0	0	17237000	9828410	0	17296800	16044300	11044800	11181300	14990800	19114100	7810450	12717800	17720200	19115300	11701100	20043500
HSPA5	8.10473e+06	4660970	8984910	4971040	2.83461e+06	2.38024e+06	7.4124e+06	7876240	7635950	7509260	4142345	9125010	8831220	8710700	9404443	8515450	5.62097e+06	7893040	9138213	7483850
CLU	29879100	31960300	32559134	28552200	31604800	32608000	28120600	30178000	27835600	28865500	29241700	27681500	30092434	31407700	28717466	30186800	31522400	30657666	31583600	30187100
HSPA8	710788	727072	435518	596425	712560	660201	516293	0	350658	670660	720083	466057	866463	675517	700427	515614	762894	625576	802993	671335
PCYOX1	679691	644945	576670	481594	520275	435191	415330	578196	533010	424332	592114	603689	545236	570277	531999	495905	595408	543287	731228	639951
HSPG2	76851.3	135218	178559	99426.4	130632	86346	143674	85718.2	143658	89514	116361	137212	155989	95446.7	118565	140906	127388	54509.3	206449	76588.8
HSPH1	4356060	4.63474e+06	0	3.17718e+06	649100	3.22481e+06	0	4.06846e+06	3.81624e+06	0	3.68973e+06	5156190	4428020	4.23302e+06	6927250	4094540	4.27557e+06	4.05773e+06	5834760	3.21309e+06
SUOX	19096934	32435734	26627834	19081334	28351534	11937450	23930900	14958500	18996700	28295000	19501600	28418166	34050600	29012534	25695334	24977866	27442134	29188300	28904334	12023900
HUWE1	806082	1571300	1850380	1599080	1582930	1169640	1412270	1.18643e+06	1152350	1.05389e+06	947967	1.68538e+06	945322	1.21945e+06	1477910	1.5448e+06	1608020	526517	0	0
CLEC3B	221725	154198	263300	279249	210149	261110	190258	138796	172367	227242	248315	283579	336041	228709	274410	153162	282495	52722	336787	250708
COL6A1	2270147	3176470	3037780	2.31366e+06	3205520	2834580	1797460	2673080	2650580	2965500	2472310	2.04041e+06	2.15627e+06	2051900	2438514	2929290	3085020	2916960	1.34149e+06	2701970
COLEC11	2345820	3225110	7874460	5078580	6.27065e+06	4513070	5538250	6458190	8314160	5.06135e+06	6652730	4.57411e+06	6.2819e+06	2.23615e+06	6550880	4221495	6613760	4956720	7756450	4.89405e+06
CAPN5	41566200	38004600	33945600	28874400	37922500	35602900	33162100	37831600	37980500	41297700	32490300	36180900	36531100	35777700	37727700	37863200	40431300	41991900	37561400	30886900
CPB2	2299640	2007450	1935010	1827210	1814930	1.99094e+06	2009260	1990810	1583810	1433940	1474460	2181160	2092070	2144190	2198430	1970010	1970190	2265410	2374290	1870520
CRP	214807	711133	930035	250265	221150	613559	693254	612284	741780	554569	799954	170357	1192240	747343	830243	374948	899811	355556	818997	266325
SMARCA2	48491100	58185000	50124400	31296650	36045400	42462300	36390800	54179000	49034850	61676900	41462900	41922900	36519150	48894600	59375932	21726400	60934504	0	57468350	40876370
GSN	9612940	9267820	10251900	8893320	10291500	8597270	8217690	9039970	8887050	8552130	9827010	9954440	10698300	9545320	9569710	9781950	9983555	9374840	9703010	9600840
GSTM1	4.27329e+06	8.09648e+06	6199250	6142910	2032670	6257970	4.00269e+06	5839240	5493020	6550350	4.8669e+06	4.64468e+06	6911260	2.52751e+06	3843700	7197040	6191200	6638550	0	6065160
SNCA	7612380	9658830	9117770	7652260	8770300	0	2162650	6.13005e+06	8116850	6035680	6.01492e+06	8593440	9001060	7007800	9329840	8658500	9243630	0	9213470	7797270
PLXNB2	1.64923e+06	2015320	2.05684e+06	2227710	1.92489e+06	2181745	1.09347e+06	1.40548e+06	2074315	2.21834e+06	1.19083e+06	2107730	1128790	1532289	1954660	2219970	2494020	1.28593e+06	1921440	1262960
PLXNA4	8044970	6839160	6788280	6526110	7318970	7307730	7875390	6667520	6590740	6909040	7016270	8348990	6957710	7081970	6205920	6442500	7882530	9080080	7728180	7324340
PLTP	830145	939022	806397	814730	909563	1030430	731011	863553	815281	829550	732372	890228	783577	949246	882944	729833	1147120	944017	849745	651271
SNX29	12771500	10813200	10409500	8763140	0	10901300	0	0	5300480	8795980	0	9761680	5939640	0	10257400	10413500	9682120	0	5757590	9204360
CPN2	1031240	1178050	1210940	1.10418e+06	1.17236e+06	1.08022e+06	914579	1188720	1.20122e+06	1097030	1142350	1028640	1.22898e+06	1283870	1067160	1041280	1161640	1224390	1.27573e+06	1099690
CPN1	1926900	1874230	2225370	1.52478e+06	2308880	1981540	1493660	2094730	1760140	1985130	2109560	2090730	2179320	1687830	1920760	1894760	2144650	2222540	2218210	2104350
PLG	34963300	31633900	32840100	28190200	31801300	31564350	30801900	32230250	32507700	32311450	28949900	28382500	34184650	31750000	30164750	31355350	34314900	33791050	32310450	31066850
CPA4	14131100	14407200	16995300	13204500	16002400	16564600	12015300	14737800	13613900	13601800	16034800	0	15066700	14962100	14239800	15326000	15057900	16667400	16787200	14801600
HDGFL3	2.07986e+06	3.5569e+06	3063370	2204525	2435910	2.74567e+06	1.61979e+06	2438720	2521900	3.12956e+06	1.3844e+06	2264350	1258200	2620310	2.87015e+06	1.70726e+06	1.93155e+06	2.16969e+06	2707790	1908790
PLBD2	1652000	2350920	2604250	1657580	2488400	2.44471e+06	2075640	2177180	2.08792e+06	2215900	2249230	0	2.27495e+06	2258440	2.34345e+06	2327660	0	2303980	2.11389e+06	2.32938e+06
CP	4724220	4.59981e+06	4597020	4.01584e+06	4654890	4276180	4009460	4.24153e+06	4159400	4.19035e+06	4605900	4604840	4.18496e+06	4502450	4.14182e+06	4373980	4209010	4.07748e+06	4825520	4.17367e+06
PLBD1	2513190	2447900	2904430	1077590	2955860	2855720	2317480	2454160	3947070	2335540	2348330	2559000	0	4052850	2674160	2671170	2622970	2889060	2752460	2610910
SPG11	2075520	1832620	2.0946e+06	1610310	2452550	2.2659e+06	1573050	1.97961e+06	1582170	1.67016e+06	1.80224e+06	2256660	2214180	2.23609e+06	1498450	1940530	2.42093e+06	2.0164e+06	2697780	1.95332e+06
HBA1	7.97829e+06	7625960	7.31919e+06	6179510	8.15241e+06	7.24303e+06	5.31723e+06	7.52159e+06	6.43927e+06	6.69373e+06	7.11306e+06	7.92414e+06	7990300	7.87931e+06	7.85613e+06	7.79451e+06	8786403	7324390	7986760	6.99125e+06
SPTB	116799000	119682000	133487000	103856000	756744	118903000	96995300	105982000	100059000	113561000	107856000	114571000	664331	116976000	114156000	112465000	115708000	104046000	114840000	115334000
SPTBN1	50006132	135609000	0	123870000	132273000	0	111843000	114024664	119217000	132957000	131945000	0	136046000	43285668	0	142508000	47920332	78856664	86459336	115459000
HBB	28418866	30189134	30520900	25879234	30075034	28323934	27754100	27675466	28375666	28457900	27278366	30716600	29906000	27964100	27422066	28106366	29691600	28740766	28227234	27882034
HBD	674184	597907	633831	546276	664293	616196	497467	615810	585674	629858	581811	576765	669595	574685	515616	531751	614370	660159	645097	577320
SRPK2	25850500	0	26819600	0	24861400	19158600	22900600	23340400	23887700	24711700	26344800	0	25983900	20679400	21168000	25248300	0	25366000	28459700	18587600
SSB	6.82146e+06	7000160	7134250	6000500	6796110	6723020	6270930	6200510	6152230	6247000	6353730	7361590	7.38144e+06	6.08105e+06	6558790	6.73887e+06	7.27658e+06	7059060	7096410	6750610
HBG1	25968800	54772400	50137500	50521100	26904600	29603000	0	46046200	48193700	42440800	28012000	55360000	39518900	56779200	41314400	46869300	0	41215600	51496000	70939800
SYNE1	61047830	72908450	42907000	53366700	27518066	64281932	51840800	47629430	55160732	59339170	56737800	18689034	68741660	63798468	65613100	62912830	31111000	0	60528200	43696068
SYTL1	9390750	15880767	6356900	13544500	17354900	11196033	10512597	15094050	15314500	9768933	12067967	12291433	11793433	11385533	12134600	13957650	11456267	16065400	17146000	0
PAPSS1	5.23677e+06	11386020	7828580	5.37647e+06	11188147	8962293	10180027	10292253	10154680	5.73093e+06	9395560	5.91693e+06	11174613	2.44507e+06	11516120	5257600	12163233	8722500	5417400	4.43683e+06
TKT	21552100	6.91297e+06	19545400	11945133	6632600	12585067	15389500	12718133	14406657	17408600	17520766	18947100	7.28347e+06	2.96982e+06	19705500	18138500	19254600	15324813	14102800	19810200
TGM1	2995700000	2952210000	2980350000	2693810000	2917300000	3002060000	2918270000	3042630000	0	2922520000	2658580000	2793190000	2803890000	2817460000	2899080000	2880510000	2799780000	0	2867040000	2538820000
TGM3	0	391048000	153262990	372720000	457224000	134750990	380461020	262818000	264730670	263933330	253615340	282621340	135904660	270728670	374899000	0	436173000	259834670	433235000	406728000
CD5L	18498066	8766920	13190600	14714467	17694600	16403200	8166650	16793800	11903827	14926400	14275800	17716500	16151000	16731000	15014067	16218900	16006533	13801157	6839800	12233200
CD163	4627430	5.01858e+06	5824850	4.41114e+06	4969540	4255540	4031580	4475160	4383190	4457780	5477310	4743090	4617250	5082780	4.46644e+06	4889730	5250160	4511100	5105160	4517810
CD14	678835	715808	710371	760888	778841	714010	577917	641596	619787	698984	658140	767546	853529	696974	812887	741301	774408	616456	799192	798646
IGHV1-18	4.37291e+06	4.2687e+06	4.30864e+06	3.84108e+06	4219070	3.60947e+06	2.9834e+06	3924060	3.133e+06	3.94231e+06	3817740	4.21882e+06	4.50594e+06	4.18187e+06	4258400	3.97978e+06	4.09828e+06	4.11727e+06	4.46739e+06	4190370
CCT6A	18908834	15599800	13912867	16117400	12532300	13832400	13303233	23712934	18591900	20665834	21163300	13929633	22546200	19013950	14189100	11914200	21139500	17204866	18974700	19549200
THBS1	138601	158987	165183	135537	135131	131800	133385	111936	120078	141134	128357	128268	149618	160329	145496	151514	156010	176760	140004	88317.5
IGHV1-2	3552260	2.71068e+06	3.08729e+06	2.87457e+06	3145510	2864080	1428650	2208040	2222130	2557110	2.57694e+06	3.25311e+06	2835030	1.8377e+06	2.53487e+06	2.57948e+06	3.02614e+06	2564160	3.30512e+06	2.52322e+06
IGHV1-24	1686110	5.22322e+06	6.50573e+06	2.53401e+06	4.99923e+06	4698060	2.59166e+06	3.44996e+06	3544290	2507220	5.3782e+06	6251140	5.17392e+06	3.50718e+06	4262620	4777370	4.66705e+06	2477380	5.19426e+06	3783240
THOC6	24948634	24414300	37332200	29403634	37638830	23097900	33312434	22920036	22187866	36191770	22651166	40430830	27154334	35246400	37359932	33105534	37554000	35282132	41262030	35218700
TIMM44	34266400	28829866	36538600	30123400	33659800	31129400	31538300	30331100	34822900	20325100	29631500	22280234	34273500	27957134	29272700	33247100	24540266	34835800	33737970	30829466
IGHV1-3	3559370	3342970	3478860	3041640	3316890	3152090	2609820	2837970	2837310	3330780	3.09282e+06	3553810	3.88196e+06	3.01621e+06	3.67862e+06	3251640	3603900	3032220	3682540	3714140
Serine/threonine-protein	53736770	58755532	52116100	48395500	62155900	49546370	48698100	55699970	58590068	65171700	56021900	61756900	59516000	52616800	62900268	43694332	61579332	45126500	53865000	52815030
IGHV1-46	5918600	5.56871e+06	6.04184e+06	5546700	5123110	4.93389e+06	5254670	5.15653e+06	5.06448e+06	4.86141e+06	6104900	4821700	6232510	5883400	6205450	5.38707e+06	5.57369e+06	5.22165e+06	4.92057e+06	4620320
TLN1	3774680000	3562580000	3702660000	3278066700	3723610000	3517310000	2967723300	3600833300	3404260000	3615939800	3494900000	2806280000	3745370000	3565610000	3551030000	3481906700	2395793400	2498206700	3737790000	2338120000
IGHV1-69	1641260	1.45494e+06	1413170	1653090	1296950	1430380	1.28666e+06	1608700	1363000	1769770	1246030	1.63475e+06	1801960	1445540	1.4833e+06	1741820	1643180	1.56508e+06	1499110	1369530
IGHV1-69D	2978310	3.16447e+06	0	4463610	2.75804e+06	4194260	3.43341e+06	1749930	3054030	5401330	4.66419e+06	5.69516e+06	4329500	4.3365e+06	4.85812e+06	3667145	3.39956e+06	0	1993520	972257
IGHV1-8	588595	646879	0	0	571820	532482	432224	824402	666079	780720	463233	483441	545226	358954	470964	827113	259002	327003	931184	256546
TNC	628695	822153	732420	704195	926530	1.28619e+06	371000	503643	816498	708535	759922	883667	913845	796631	624743	840105	834813	852401	735556	729546
TNS1	4026960	3563555	5478810	5.12691e+06	2641395	843703	0	6859460	3.2277e+06	6729870	5909490	3558880	6096980	3.79988e+06	5362760	3547840	3.47247e+06	4706810	3684355	0
CARD9	1908120	1561170	1798460	1925870	1216060	1794350	1331240	1897580	1494280	965493	1.64741e+06	1839570	1697200	1842380	1901000	1129190	1876620	490553	2047450	1683810
IGHV2-26	242580	232053	240990	160555	255416	218683	165172	210049	232417	174858	131571	187042	196949	237493	179456	155473	206071	132918	254736	182609
IGHV2-5	830677	612438	711940	627895	847060	565629	554487	452569	734026	797136	704411	769357	723312	788826	867639	765524	432653	732690	691112	590484
TPD52L2	1162920	273301	1163150	843243	1272370	1280280	684216	1180040	207127	1.00882e+06	1316820	1334978	1272220	1.14337e+06	1.17652e+06	1145540	1251800	0	1290600	1.08725e+06
CAPS	13893700	12874900	13289000	0	10948300	13890500	12281000	15024100	11738200	10952600	10419700	15091700	12796000	12195500	12336700	7525270	13347100	13459800	12824600	10410100
TGFBI	254607	243975	295673	265430	275291	256533	206289	266127	273820	288372	272800	313044	274541	289751	269889	285856	299333	198524	285132	314678
CDC42BPA	17500700	78822900	76562800	42164800	29604466	48211100	0	28445766	58420236	28520900	30397400	33667600	47974800	66775668	44739200	65386170	54809268	49781532	48405468	14927567
IGHM	101029500	81180300	91307600	74997250	79481800	91524000	79343000	80335400	78075600	79068100	80038000	82524800	87897250	86241304	84364550	88987100	91887860	83772750	87396800	80506500
CDC5L	19340900	13553700	15109700	18580300	12418400	19424200	16938600	14578100	18105400	18222500	6353820	18997300	21181300	18338500	17843800	14537700	18071000	14373000	18225000	20002200
PAM	15634200	12240867	11287733	9372033	16390667	15352000	38962300	10900133	21276900	26662500	15074800	13490800	18419700	9495667	16513123	17404400	11858000	19362300	8340670	16032500
TAGLN	54283900	54424132	36897268	42154500	54355132	32336200	42824300	48616900	47158800	48142800	52676068	53618200	55373300	34053000	31571200	49355000	50962970	51942668	35083268	48511400
CHMP4A	6.00392e+06	9288450	7.61803e+06	7.83073e+06	9381027	8.29536e+06	2.60933e+06	6.10877e+06	5707420	3.2383e+06	7.71589e+06	6045080	8746610	8692143	9617630	8685047	5507050	7.4423e+06	6.21325e+06	6.48402e+06
CHL1	137176660	127902000	136190320	123972000	125445660	121877000	123378000	45221004	129484000	94204670	123926664	137083340	95160000	42331668	66054132	129257660	135490000	132369000	101252000	84648000
TALDO1	1011650000	1033146700	685099970	908608000	1075170000	971550000	792875000	962074700	930100000	949983000	952377000	946181300	1043690000	1007660000	991712000	951515000	973046000	1024220000	973397000	959574000
IGFALS	2885870	2590710	2406250	2764360	2.7443e+06	2898920	2282110	2682570	2603500	2779160	2.74771e+06	2649530	2.62192e+06	2649670	2408500	2694850	2766510	2901610	2665050	2529750
IGFBP2	24003866	25707666	26339934	14981467	21260400	17494800	15175533	23978200	25643300	24962100	23718234	26949500	23462266	24848566	23432166	20105666	21610600	17968634	24620434	24012634
CFHR3	278315	262289	299592	191562	281174	266337	92362.4	232212	179810	167549	232372	259770	219044	263273	295016	200503	258749	231768	194057	223283
IGFBP3	2074300	3.08336e+06	2141870	1.33222e+06	1.82348e+06	1.61305e+06	1702180	1.48253e+06	1428520	3.05851e+06	1.93162e+06	2276970	2.36231e+06	1760590	1266300	3.02177e+06	1875550	1919640	2.48434e+06	1526670
CFH	4.55237e+06	4.50642e+06	4735110	3.99995e+06	4669760	4.34689e+06	3.86947e+06	4405040	4064230	4.65187e+06	4292870	4.67652e+06	4656010	4684320	4.69584e+06	4455660	4.54509e+06	4629680	4.70373e+06	4793920
IGHA1	386971000	333767330	350543680	306029000	347004640	357125000	298166660	331459330	296752670	327246340	343563650	353132000	331748670	321755000	348531330	354028320	392591330	320076000	353283000	353038340
CFB	18652500	16490600	17195300	15763700	17872066	17638100	16444100	18144600	17721200	17239600	15685600	18254500	18049600	17506700	17069200	16794600	15684100	17640800	16748600	16420200
IGHA2	9114140	9759060	9018490	6827910	9695420	9619720	7476620	9449050	9276920	9707860	7728040	9960890	8921910	9330350	7992980	8718960	9111280	9286610	9746850	7725820
CEP250	56949800	71208000	64979400	56061900	63740100	51561200	60143200	55595300	58791100	56369600	58823700	69740400	57271200	57605200	61935200	59868300	69241900	57646200	70366900	51000400
IGHD	2288380	2.18109e+06	2376170	2.04358e+06	2.25556e+06	2024180	1.81668e+06	2334980	2.33577e+06	2277820	2.40723e+06	2458190	2.27468e+06	2.33046e+06	2105380	2.22293e+06	2.11679e+06	2301590	2.37398e+06	2.4497e+06
CELA3A	181470000	172337680	183394000	145003000	128592664	160349010	167986340	165681000	176233330	185318990	162472000	167397000	179310000	177701660	168344000	163486990	166062990	162585330	174681000	185342000
IGHG1	1157836700	1187366700	1218543400	1059416700	1188456600	1012753000	1027436350	1054686660	1106683400	1055080000	1160306700	1151000000	1214786700	1197353300	1152640000	1093576700	1098010000	1080776700	1165083400	1131296600
CEACAM8	3595540	4.71675e+06	4.2118e+06	5167030	5014800	3.6585e+06	1.53892e+06	4116870	5.06071e+06	4028210	3605160	2.95289e+06	5789390	4560720	5.24205e+06	5.47266e+06	5.14882e+06	3.27157e+06	5.45508e+06	4.76212e+06
IGHG2	62750468	67041732	62552100	57638400	62244332	60096800	66537932	64388132	60965732	57006932	68035370	62745570	64626170	64146868	61987468	62822668	67193830	60379770	64432200	65532630
IGHG3	7011890	7122690	6644110	6391900	7796120	7003570	7981930	6.36683e+06	7469350	7876340	6064870	6770470	8091370	7.22916e+06	7507540	6.92912e+06	7193710	7.24065e+06	7.18902e+06	5995950
CDH5	0	9258240	1506370	7149080	10226700	9026150	8110050	8661230	6682160	9347430	8344520	10384600	10949400	10559400	11988900	8352920	9321870	8994580	10533000	8234930
IGHG4	122951000	123156000	123696000	104486000	118929000	117277000	94420500	116588000	104596000	116317000	107860000	120412000	125837336	119854000	118764000	119606000	120840000	123880000	122732000	107937000
CDH2	0	4033620	3.53369e+06	2707680	6.42483e+06	8.33695e+06	3.46482e+06	1.5791e+06	0	4.42463e+06	3.70443e+06	612567	3.74598e+06	2.25743e+06	3.99861e+06	4218980	7844020	3286060	3758060	6.44534e+06
TF	7967230	7897990	8091710	6741530	7034500	8267330	6667000	6895650	7099320	7152670	7709200	7826330	7921620	7274350	7603590	7196020	7078400	7264810	7741330	7750730
TFAM	148609540	155448590	159947140	123516000	145192800	130197530	131120730	119835130	131881600	142366740	133854070	148684740	164173660	139956740	157254060	132137600	148227000	131379610	156416860	127207930
CRYZ	2.0191e+06	1.82377e+06	2029750	1471510	2.07971e+06	1.92377e+06	1137550	1778240	1435470	1743460	1824830	1.31201e+06	2.07362e+06	1936500	2087610	1984030	1854380	1982120	1991150	1937600
CS	1.65811e+06	3.77473e+06	5.08724e+06	4322200	5.47359e+06	7.15935e+06	2.51449e+06	6221050	4125280	1682890	0	5029990	7434300	2.48781e+06	5183030	7040180	2189900	5363940	4600690	7.69925e+06
PON1	20097300	19429400	22449100	17883800	20153100	17338834	15868633	18290000	17868666	18786466	20002900	20078500	20369966	20537200	19640766	19708200	19354034	18557200	21942500	19571000
QSOX1	1002677	866886	892868	643777	768782	815266	850904	1032680	663208	846016	832900	1001950	980749	856346	888698	706830	773228	861000	683777	908736
FCGR3A	921584	820782	971366	471824	389183	596336	470026	499066	425615	550904	382368	487797	888231	298742	462295	482157	742305	827476	291574	809188
FCN2	1.35263e+06	617020	1.59712e+06	1.36297e+06	1385570	972536	566090	1.26723e+06	1791840	1692460	1.6458e+06	1.97554e+06	1889240	1843810	2092570	1.53882e+06	1.84575e+06	1.29735e+06	1.51149e+06	1260170
RTN4RL2	6.61813e+06	9738210	10360700	8249360	10478183	9691490	4.80937e+06	9691470	8153450	9064620	8542030	9439460	6.84673e+06	8699630	7990500	6086960	9781247	9915550	10679200	9800410
FCN3	597320	539556	650300	657086	656042	648436	581258	721984	692289	578125	733545	708516	659752	636009	625848	628497	666605	687589	738599	602716
Rab3	0	37221868	58796000	40956770	22805534	0	21197366	50760600	47749132	33232600	49161900	60038900	61140400	0	52868932	55246570	64990236	59483970	62411300	19259666
FDX1	0	45829900	42059570	27173400	37346532	28522800	30352900	10901967	40573668	33966630	32760634	12119600	45602000	11636133	36236970	36820500	33625000	37214170	12556033	30165100
FETUB	1.85618e+06	1704150	1.69811e+06	1432720	1.83742e+06	1724830	1430410	1736080	1695830	1558950	1747640	1.7894e+06	1.82328e+06	1832990	1514250	1899040	1765670	1702340	2012270	1.75763e+06
FGG	54472770	52840100	54220170	45437970	53374500	47080600	45719770	48067400	46215532	47746468	47436532	54239732	54398430	49546868	52030300	52419068	47373668	48851370	54602068	49942400
SAA1	2.28499e+06	2484364	2.62342e+06	2230153	2461559	2.3144e+06	2.09782e+06	2.43988e+06	2232246	2170979	2394443	2.22746e+06	2.82857e+06	2318431	2.62855e+06	2.51674e+06	2.85033e+06	2330139	2359601	2.51049e+06
SAA4	3.1175e+06	3.01045e+06	3.11217e+06	3.02154e+06	3.0805e+06	2.40559e+06	3074380	2.98038e+06	2.64397e+06	3.71923e+06	2.89602e+06	3.39944e+06	3151270	3.16559e+06	3.26288e+06	3.22999e+06	2.9433e+06	2.77345e+06	3.068e+06	2946350
RABEP1	5919620	8678140	5.78583e+06	1.37615e+06	5793620	5.45319e+06	0	5.55831e+06	1580060	5.63963e+06	6640970	9325930	9295850	0	8251530	0	7941230	7.06173e+06	1.4555e+06	0
FKBP4	116652000	98710700	96082600	0	103295000	90148900	102209000	71782900	91057400	103956000	87207100	83880600	118211000	93327700	88639300	0	0	108845000	41912600	83106000
PZP	1009720	912786	907979	758121	990132	784119	743964	921394	758551	912190	978972	980481	1042300	886602	977142	923714	998784	953561	1009710	813754
SELL	1872290	1566090	1359240	1223100	1349860	1196910	979937	1.08594e+06	1.40522e+06	1106590	1262330	1307850	1211400	1216760	1.35442e+06	1302740	1374000	1358550	1270600	1.15941e+06
PYCR2	11070500	7.19633e+06	11665133	10553300	10898400	0	9616813	3.40293e+06	3386100	7057000	10893133	2.51914e+06	3669600	10824900	3.47297e+06	10565567	11080533	11356300	3.59627e+06	10564533
FN1	8651530	9389280	10056500	8268110	9502980	8358340	7031960	8305525	8339540	8212980	9658960	9785030	8661380	9020900	8922400	8807140	8241020	7797830	9519370	8852890
SBSN	34415000	33450200	33056400	26142600	34119400	21217066	22955100	28961600	26795900	28472500	29288100	31950300	32175900	32333700	30567766	29052700	31886600	31451500	31306500	30288600
FUBP3	9129510	8212180	9051420	4.47927e+06	2842150	7432340	6181610	7434220	7.13374e+06	5.33735e+06	2.52955e+06	9403950	0	9357810	5.46887e+06	4200260	8547100	3775190	6.16193e+06	7853980
SCIN	315629	422933	323479	339435	273976	380174	231379	99261.5	86852	324446	386095	354462	424254	188720	157599	361293	426539	239792	333406	189620
Fibrinogen	119397000	81034100	103634340	92045700	112797000	116674000	100748000	115054000	117296000	100049600	90758500	116584000	97619500	110692000	106570000	101908000	95556200	102044000	121021000	96653100
G6PD	29999900	22209200	30192000	28348900	9240967	27777400	27976600	30249900	0	29900900	0	28057100	28914300	27879800	28695000	29531000	25205200	0	32315000	23728066
PSME3	6960060	3.09227e+06	8642830	4.47744e+06	6826150	8502607	2502390	5119000	7097230	0	6350360	9148490	5.14109e+06	0	4.20607e+06	7035900	6.44767e+06	5005190	6.27561e+06	0
PSME1	14285600	12031700	9714200	9793380	11391600	11610667	7317990	0	9410600	11167800	12237967	0	12915800	0	13492700	12715200	13178000	10872763	12476500	11754000
PSMD8	7782800	4348690	5079280	1667880	4023510	3134570	2986770	3515550	3272220	3488870	3605420	4144620	2.68708e+06	4063140	4514450	4733350	4437280	2885240	3931150	3913020
SELENBP1	362711	197033	157874	164023	235757	206910	105574	179075	230564	0	290954	254630	140508	249368	305207	232514	238858	310136	91853.3	230581
GAS6	4177800	9981800	13340900	0	14543700	0	9623513	0	10206900	12657933	10835800	4671600	15797333	4623500	8612133	12315100	13202600	7.28047e+06	4.67357e+06	10201667
RALGAPA2	28099834	96714840	99897600	22250400	103288000	71875900	63483136	60744204	96196930	95331240	64373200	90549140	72642100	0	0	75496200	77393100	97351300	76406500	66191900
FBN1	2151430	2163560	2192570	1980130	2668220	2193760	2573300	1.91411e+06	1435000	2495750	1.26771e+06	2518810	2742050	2148790	2335750	2378350	2561430	2300910	2598970	2.29987e+06
RPS4X	5.73036e+06	2630140	6.97481e+06	1.91871e+06	0	5595960	5229280	4355360	6124770	5829360	6.30441e+06	4533980	2519740	5.71807e+06	2426190	4051460	7100160	4.27541e+06	4.74915e+06	3806880
ECM1	1770950	2022760	1.96069e+06	1578800	1934100	1.78553e+06	1.5915e+06	1.59264e+06	1.54889e+06	1.8532e+06	1583120	2.01768e+06	2172700	1.72178e+06	1.76941e+06	1.72904e+06	1.7158e+06	1692920	1944060	1.7043e+06
RDX	31475834	9374400	29027134	25270400	32967100	30573800	26270600	26036000	31396300	28675200	25613900	30042400	31384300	20079466	27304300	32877800	0	31033900	32994600	25348266
RMC1	35180900	42782268	45090830	36307268	41456230	24499000	35191100	0	35545900	19579134	38141732	0	0	21358000	18592934	33108700	39182600	26383200	19423000	13634267
RNASEH2C	624050	813294	595052	744194	1018720	470703	678234	831181	516678	804147	706457	734794	796911	652550	772261	470676	852619	762984	972156	828341
EPPK1	5139390	7.12226e+06	0	0	5216110	5304000	6.65681e+06	7167090	4841920	5053920	5957590	8118140	4195540	6804140	5197770	5.28403e+06	5991760	5757130	5432510	5777680
RNPEP	8269260	7693450	7414730	6540500	8706207	6.8117e+06	5923810	7080130	6099870	6603860	5391370	8380060	8022030	7651280	6.46317e+06	7.10663e+06	7034730	8.23288e+06	7129160	6.26263e+06
EPS8	12740267	15265300	16651700	0	12583400	12724500	12186600	0	0	11164267	14326540	9295267	12557430	8861667	16005800	10864133	18101800	13790900	16783200	14755300
ERAP1	12540067	10936067	10650433	842763	6.92573e+06	10053453	10207500	13416400	8173530	9392945	11500733	7941400	9307367	6.20461e+06	10644800	10902200	6203650	5621850	10762300	11427467
ESD	589233	1767240	2097070	833120	1810510	1710600	1697650	1387280	1565030	1687010	1163590	1239880	1.26845e+06	1760170	1172420	1376290	1.12419e+06	1919020	1.90225e+06	788240
EXOC3	8404263	10086485	12034700	8437860	9685097	3587900	8570880	8963127	9237790	8977113	8820280	5.87641e+06	2.7856e+06	9096193	4140925	9578440	5791500	10702000	10159930	3.09934e+06
RBP4	14046000	13946700	13292250	11733600	13515700	12322550	12090000	12641100	13056650	12095600	12627200	13981500	14183750	13277000	13047150	12875700	13561500	12894850	14833750	13227400
F10	1113280	1988170	1614400	1733110	1698460	1157190	980580	1.22359e+06	1242380	1004390	1320850	1410440	913695	1012850	1495880	1279880	1500190	1196260	1380050	1283580
MNDA	1644310	5.44736e+06	4711470	2.02478e+06	5176030	3.96981e+06	2.18285e+06	3609550	2853310	5.11981e+06	2925390	5.3482e+06	5580660	4840930	5014880	4063840	5.07535e+06	4876150	5112560	1798160
F11	335586	539832	444422	295834	400936	325370	344978	385443	348261	306898	361334	383725	327068	317074	289584	433623	294833	270088	331754	160142
F12	3.48395e+06	3450580	3.31878e+06	2548740	3.47856e+06	2.94936e+06	2809100	3166770	3.00941e+06	3.36021e+06	2567120	3221490	3855710	3.12557e+06	3.04797e+06	3.18071e+06	3.16194e+06	3594660	3.60883e+06	2.82246e+06
F13B	604220	611774	578512	593637	562471	479338	514841	642731	646613	503303	543309	638744	609846	549198	612641	484526	598101	622617	629022	600846
F2	50790600	56453500	51428600	46837800	55678100	51124800	46528200	50309800	50843600	59529200	46353400	46825500	55341900	50285400	54160200	52622700	47807200	55117700	54534100	49913900
F5	523522	500047	476032	495943	455070	439579	381921	427114	443700	448226	547599	454098	545951	477691	446680	519569	493649	487517	585063	540136
F9	1230918	1393066	886507	1.32517e+06	1364032	793546	731720	1.45447e+06	1.73824e+06	1121665	1356501	1.11013e+06	995055	1179498	1272704	808953	1.06836e+06	1156047	1451513	919514
RBCK1	45720550	42583000	43620900	38239800	47450600	37912900	33265800	8812650	8197000	44813300	38765900	32185650	45777700	20640200	49749600	22723900	54211000	20890500	20824850	40178800
RPS23	64383800	57943800	63502900	50946400	62365300	53695700	37055600	30856150	59024350	0	33319134	27360700	39446400	56950900	57401400	56069600	45595936	36966068	61874600	38939932
EFNA1	2.16584e+06	7325020	6772200	0	6692750	6419350	6228760	3939860	1.80111e+06	6867950	0	2.30685e+06	4.61577e+06	7209870	6791290	6084590	2160010	7098490	7272950	5366770
EEF2	0	21317576	0	20821096	12139100	29297566	0	0	19480100	0	29424266	36135400	43622500	38246000	35539770	35496370	37887700	27757200	0	22228434
FASN	33529500	25718250	18508134	29461834	30918566	30704634	31530566	9141867	31334066	15863733	25824400	29849300	27920866	20491600	10717800	30986066	30034366	17178500	32725700	17923034
FAT2	15876200	12237133	13264800	11215200	12460400	12788433	10915300	10512600	11507000	15337067	11494200	11334400	13538200	14326800	15517000	13516300	12436467	13642000	16439600	11049700
FBLN1	1039300	1112750	1159330	957682	1031220	923340	1157680	992460	974860	1007620	1174770	1.02396e+06	1081980	1070960	1104020	1.08284e+06	1138410	1.03714e+06	1208520	1.07479e+06
SELENOP	4545580	4541670	4888340	4125360	4213700	4310090	4029020	4.3864e+06	4081090	4862060	3837640	3.90972e+06	4165790	4.77885e+06	4.63567e+06	4453320	4.36902e+06	4518940	3928510	3.52558e+06
SEMG1	6222990	7013390	1520330	6155640	6450620	4862990	6451210	5817110	7087970	6450030	12856900	6482010	0	6276290	5255390	6293850	6627930	5575280	6733290	5444230
POSTN	23983200	33949652	48504000	37629800	13532150	45011000	37415732	30448966	42121800	22638100	42760068	29884266	44138700	28705234	46380600	46091230	42825030	55933436	29953666	48503868
PRB3	3608310	3322530	3736940	2783300	3852360	3319460	2204180	1.77229e+06	2425370	2537320	2915580	2355700	3345150	3.37542e+06	2327040	3.18374e+06	3185390	2.53703e+06	2784550	2920360
A2M	28973800	26803900	28029300	23993600	26893300	30396400	22167700	26844800	24251600	25883000	26670200	27983400	27372100	26827600	27108800	25249700	27543600	25931700	27457600	27228100
GIT1	1603810	1.47319e+06	1.63382e+06	397140	1375740	1.34825e+06	510833	1.26123e+06	1467570	2054310	565522	1290470	467007	1334550	1414950	1283580	1164180	1.01939e+06	1386350	1533440
PROS1	2.24913e+06	2.67151e+06	2867090	2.50403e+06	2417190	2.60231e+06	2.33614e+06	2714460	2.74651e+06	2629090	2.51636e+06	2495960	2.43249e+06	2.83618e+06	2648000	2402420	2.42471e+06	2.64457e+06	2703420	2656360
SFN	156927	156612	238455	173277	241614	235578	140815	250929	166625	225213	183775	240998	225329	273718	199066	202832	234101	236810	188100	218185
SGTA	123388664	128519336	126891336	91245660	123310330	115054000	114395000	39040332	103330800	46062000	94296460	118636000	87414000	120513336	123223000	109400000	119944000	145639000	128013000	96415064
PROC	592375	577356	621521	461725	583036	496764	426831	488694	466874	463526	518248	563828	532206	577953	503791	541395	517240	518073	590985	531697
PRKRA	0	9819320	10401200	8484830	10860300	8785620	9166340	8895710	8634490	8824140	9570447	9821850	10268600	10634000	9092360	9810810	10268000	9344550	10238700	9296730
PRKDC	2193280	1846730	2.29539e+06	1.8682e+06	2035590	1776910	1.52999e+06	1.12561e+06	1.69158e+06	1.50319e+06	1728430	1969530	2108250	2041020	2004760	1616630	1791250	1893140	2130620	1.83209e+06
SHBG	323629	441966	494431	314021	329299	318544	366878	437992	431514	466014	382684	460100	369962	377234	313792	352948	324317	429419	395325	281090
PRH1	929207	734350	1214600	1.06025e+06	1.02277e+06	1258610	480139	1.20938e+06	743310	1039710	607935	734560	977920	1262290	801107	1163050	1315870	922005	428227	622033
PRG4	1230140	911736	1073670	878869	900458	1054810	832058	1335560	919453	1229670	1032320	1045240	850215	1011420	757331	963701	978702	1320560	1553830	1053580
PRDX2	325050	299965	326781	277992	343474	343916	302372	347117	272537	251653	276658	334979	354490	364957	290604	270603	324660	296809	325211	318547
PPP6R3	9477200	14959400	16570800	12254500	14633800	13242800	0	13626700	13062400	12874100	0	14951800	15948400	14375000	15730800	14044300	12526100	9067733	17117200	13326900
SEMG2	8702690	8606670	9146520	5.58673e+06	10056200	6.46245e+06	6843100	7629200	9209180	8.12607e+06	7057200	8659290	9124500	8779900	9918610	6.33669e+06	10638700	10133200	9175800	8307900
PPP2R1A	14830000	0	4854070	9093370	13374000	0	12947900	14628900	13434100	13604500	12761300	12954000	13506400	12848200	9212800	13324300	13479100	14092800	12908400	15353500
SLC27A2	4.29584e+06	1.60152e+06	5194060	296891	1.20825e+06	5.43374e+06	4770760	0	3.27715e+06	6453230	2908910	0	0	4.5706e+06	4.63531e+06	1538240	0	5904630	3315020	3556090
PPP1R9B	4525000	12564533	14806100	10419033	14278300	8.36193e+06	10325760	0	8614733	13132567	12633700	0	9639933	3.75567e+06	8910200	11783700	13253200	13436167	0	9156533
GPLD1	2.44127e+06	2468270	2.54808e+06	1997620	2.45825e+06	2420490	1933680	2232320	2181380	2194960	2.1243e+06	2345690	2431100	2427680	2.57184e+06	2233500	2294490	2365200	2435400	2230270
GPX3	3484780	3444040	3712260	3174590	3590880	3304790	3245690	3203340	3210550	3313150	3340100	3491690	3697040	3556560	3542110	3416080	3632770	3581880	3800770	3605040
CSTF1	18198500	9823933	11274067	8599000	4.81677e+06	15532000	11828667	11850800	12586600	12887400	12440600	0	15137300	14010000	15526100	5.11877e+06	11229733	13645100	15261600	14821300
CSTB	3.95965e+06	4975360	0	2798790	4269220	3718710	2.29601e+06	4.16779e+06	3839815	3888510	2.01998e+06	3796470	4836905	0	2563440	4.07104e+06	4351870	4.24021e+06	4339390	3063850
PPBP	2393050	2321470	2130900	1716310	1175930	1.41637e+06	1220520	1857760	1582420	1791280	1666780	2031630	1792870	2145940	1936250	1948820	1897590	1834680	2057340	1786160
SLC4A1	6144800	6.43817e+06	12520900	9933760	11960600	11100700	5.83322e+06	7.79867e+06	7210200	6.14721e+06	10639700	3.97107e+06	9886720	7.26064e+06	10282700	0	10594473	3.07938e+06	10947100	10120800
CST3	674049	579208	798082	684124	506092	837751	796013	696121	669093	889863	553079	692579	767868	565187	467161	677278	538772	812380	812706	627695
SLC4A2	33025500	31714834	16571200	27812700	21603566	25008666	12329933	0	14950200	20250800	17580400	19398466	29187934	28799800	32275700	21426500	29352534	26552800	30780300	0
CSN1S1	3619750	2715080	1.02123e+06	3642970	3739040	2.03933e+06	2318440	2952160	2930430	3045000	3179310	3110920	3480520	2999250	2966670	3467620	3978190	2920830	3272390	1.79943e+06
SF3B2	5539880	5839060	1.91618e+06	4760110	4.03427e+06	5748220	4205140	5559470	4600590	4.76967e+06	5097380	5555000	5470440	0	5.35718e+06	5660310	5878960	0	5676940	5721840
SF3B1	34370500	0	37800430	13273800	39506468	16046533	26941300	13395000	23967934	16106267	14072133	6.83703e+06	28695034	21802400	8.01735e+06	20813766	19039564	0	30830400	10948400
PROZ	236341	171229	228917	171656	204424	182449	138622	189395	172661	182331	204760	220032	207526	204117	204746	200490	192093	178497	216340	199721
SERPING1	6983800	7442810	7732540	6718620	7.0551e+06	7175100	6.70148e+06	6.48757e+06	6.49225e+06	6838560	7010820	8.10314e+06	8216750	6820900	7.54599e+06	7029080	6.71488e+06	6915640	7651990	7.25842e+06
DIPK1C	7635110	12914300	7410360	11831100	7793630	12255000	6955210	0	11740300	0	12897300	12865500	8419910	12603800	0	7718650	12127900	0	9289640	12256800
PSMB1	3314960	9859743	9405267	0	6.75447e+06	8659033	8609900	5.87367e+06	2718510	5.35661e+06	2.60061e+06	2598640	10263400	8959393	9142693	8034210	496760	9212183	9735637	8436590
SEPTIN7	4793290	2.69128e+06	3.11719e+06	2.49329e+06	2342075	3.54711e+06	2.01388e+06	2.93963e+06	2133910	2.70214e+06	4461080	4680250	2768245	4290080	3.93835e+06	2901000	2785980	3.12897e+06	2341930	3.06041e+06
SERPINA1	196400130	189426580	197808670	183440910	196487740	194054500	161649800	189776740	180765260	191188560	185963200	187639760	190620640	187590740	192710900	188629970	189746660	193625470	191617470	192194110
DHTKD1	7814850	8661310	8773540	7060520	9034710	7411310	6534830	7834480	7270340	7791090	6928820	8778020	9603050	6168930	8043880	7574600	7459250	8280490	9052810	7952830
SERPINA10	650678	840031	866790	700260	817279	677714	663933	742207	789506	737024	829484	790487	810508	753821	758108	718801	819366	661009	838247	668786
SERPINA3	10476000	11078250	10116700	10482450	11486700	11971700	9059810	10573550	9894180	11547500	11039500	10514650	12299300	9715010	10333300	10680800	10871350	9619850	10436300	12047000
SERPINA4	3154010	3041450	3.1859e+06	2763250	3072880	3003840	2582070	2938410	2788330	2672680	2773370	3039380	3186350	3001530	3.02401e+06	3043190	3098740	2.91784e+06	3041170	3154510
SERPINA5	2488440	2601210	2496860	2166040	2430440	2282830	1.95886e+06	2320790	2005230	2258910	2.37631e+06	2407200	2634050	2458130	2341130	2443410	2476330	2402090	2.95629e+06	2480190
SERPINA6	10308400	11167100	10873900	10139800	10933000	10761100	9413205	11072050	10456300	10285300	9922905	10774350	10978350	9556465	11344700	10709050	10374400	9861370	11206800	10555600
GC	7395830	7670415	7446560	5663310	6529620	6985420	5406870	7303480	5921980	6407940	6552540	6856930	7541780	6555930	6782550	7316650	6539640	6921140	7102990	7146520
SERPINA7	1236130	1306440	1248760	1071700	1263840	1178380	1128270	1186380	1160830	1221460	1165110	1364830	1407170	1240720	1277060	1290420	1252100	1126060	1301000	1374900
SERPINB12	18006600	18869300	16488700	7.85667e+06	15542633	11605733	12084733	17152700	9784067	4.91643e+06	15904200	15635700	12840333	14494050	11849200	16558000	18392900	11449467	6.10957e+06	16847400
PRSS3	588562	486686	635807	408261	608595	432164	313820	589545	420672	491384	486743	717856	444593	589840	524776	597319	599866	585180	644000	612995
SERPINC1	33348300	33856100	33911100	31837200	34094900	38395800	29978800	35909900	29365900	34509000	32441600	32958000	34600150	34869200	31135050	33898700	34110600	34483100	36425100	33615550
DDB1	423062	0	1737390	0	1839120	1507010	1575320	1401900	1395450	0	1110370	0	0	0	1595520	1622520	1744140	1712050	1775510	0
SERPIND1	4.77385e+06	5.03336e+06	4.8885e+06	4.17273e+06	4.86209e+06	4295440	3.15231e+06	4.52186e+06	3888690	4.90355e+06	4.66882e+06	4714590	4.66817e+06	4821870	4.75249e+06	4.75384e+06	4.7152e+06	4812080	4.69388e+06	4587600
SERPINF1	5953550	6398950	6806580	4636300	6228640	5713160	5581030	6807870	5007370	5940260	5.49135e+06	6457820	5976810	5838890	6.07091e+06	5.82465e+06	6307860	6.66389e+06	6740870	5981260
GDI2	9740080	10565500	8610520	11008140	6816400	8909860	11444907	10111793	8272880	5.40895e+06	7.25803e+06	9149930	9813470	16082000	12747433	11150947	13950900	4845580	12223433	9532027
DCTN1	14105733	16046300	10764900	8338600	6.45763e+06	9349133	11109580	8731133	12246633	14700767	11155753	11015023	9443700	9812430	15175833	14342933	14600233	10855930	15997200	10061267
DCPS	176784	114153	228917	114437	136283	182449	138622	189395	172661	182331	204760	220032	207526	107511	204746	160691	192093	178497	144227	205187
PRSS1	28118000	29653900	28445200	20305800	25498200	25691300	18589300	22287600	20369000	21640900	23262700	26866100	29341700	25906800	29334300	27826400	26989300	24644800	25944500	23363900
SERPINF2	6.94185e+06	6.09122e+06	6465100	6052690	6.54107e+06	6241050	4703060	6.18988e+06	5.62987e+06	6167660	6432330	6362430	6.29604e+06	6.19633e+06	6895870	6.04385e+06	6057750	6.02755e+06	6.47865e+06	6596020
GFAP	4.05759e+06	3.77289e+06	6014770	3.09062e+06	0	1045690	3.07026e+06	3.42648e+06	3.0226e+06	3.62299e+06	4.32372e+06	4.29835e+06	3428740	5860960	4870020	3.23847e+06	4.83942e+06	3.54383e+06	4.53583e+06	4346630
DBH	131778	176345	178542	106398	185221	124557	141787	104716	154629	162302	149402	173892	172077	174526	166562	197690	184880	125380	170114	161400
IGHV2-70D	11867867	8180560	11214667	7.91517e+06	10208027	10057500	9760340	9897800	10243407	10626767	8641600	10677367	8878600	8786457	10644200	8562120	10344860	11678100	11417333	9001510
TMEM256	75323900	83392530	84085800	51377900	92273304	79749000	81333700	70444600	84602200	67055932	65686732	89786300	91986340	99954060	102666000	98089200	89704060	72338664	102509000	65314000
IGHV3-11	69747200	68024400	69499300	58460500	66479200	63564100	56886100	62061800	57077300	63868500	63008700	71461800	68694800	64059400	67393500	65780300	70654200	62395100	69145000	64186400
AMBP	23450600	24233500	23281900	19099400	24881600	21771800	21971300	21453500	21690900	24944200	20022200	23577400	24363500	24444700	25072400	23235066	23035200	25608600	25399800	21793600
VWF	1863640	1.83342e+06	1938280	1653400	1968140	1.84882e+06	1654170	1.49377e+06	1.63257e+06	1613770	1829390	1261770	1829490	1713090	1.65593e+06	2.17669e+06	1.98987e+06	1721860	1.93751e+06	2177070
JCHAIN	53748100	70690500	57567800	41920900	57688600	46165600	37388400	47509800	43036370	43751400	49869900	55987400	52446400	52575000	48742668	50815300	47874800	50215200	46914000	50208800
NONO	1411520	1533160	1253660	1.10054e+06	1180240	1151760	848768	1089760	987746	1138489	927767	1354270	1228340	969020	845820	1316200	1422810	1.34547e+06	1257830	1257190
KIF5B	0	1623800	2506480	1812980	2395250	2138140	2197980	1432040	2195010	0	1812220	7484500	2542860	2787110	1852470	2191150	2488130	0	2940420	2582030
KIT	0	40111000	70902200	17504000	48337332	0	55736200	61161800	40939732	56726200	64528900	0	63808000	40365600	60328800	63487170	63781700	40828268	45898532	60010400
KLKB1	4627470	4939400	5687070	5466400	5663820	5601400	4290410	5273080	5149090	5183640	4669880	5038120	5253390	4981340	4466700	6299580	4835870	5764250	6792220	5.53784e+06
KNG1	55937500	56959100	62569732	50779932	62564200	51730732	53208400	52567430	50876068	50043100	55375332	57297732	60700900	60205300	53759132	57846332	57825230	53677900	59386370	54511268
WDR7	22762800	21323100	23772400	6.29743e+06	22629900	7.43847e+06	16130000	15815990	17413600	7.02517e+06	12430267	22360000	25342600	21883800	21072300	20381000	13616533	19955466	23133300	20030400
ANK1	1091290	1322720	1814330	1144280	1401320	1.17457e+06	1.48012e+06	1144280	1.04186e+06	1189100	1.00194e+06	1.38908e+06	1340250	1323960	1620970	1.26801e+06	1272430	1061780	1218550	1211360
KRT1	847857	717486	912432	620109	811814	675216	706128	872477	761104	860789	793881	815680	826222	820273	670517	872336	855055	893679	815642	773966
AMPD3	0	0	3.00635e+06	0	2.71731e+06	2.63133e+06	3.72018e+06	0	3.05917e+06	2974270	4396890	3849340	3.63828e+06	4921480	4835950	0	4557180	0	4461900	3976530
KRT10	9717370	16084000	15612300	13477500	15783900	16543000	13319300	16489800	14614900	16915100	13482900	15964700	15976800	15843300	16226000	15364900	14530700	16201433	15703300	14622200
NRP1	0	41532100	46045700	41176900	44469800	40336900	37118900	41333500	0	40418500	41048700	43496800	17701400	0	0	45872600	38338100	44388700	45523400	46682300
NME1	897999	1424310	1673700	728975	967589	852186	15085800	13685700	1364300	1290830	1389300	710760	1429320	1461670	1501910	14696300	0	1391740	1574020	739577
KRT14	350743000	240992660	367504000	324631000	341022000	322759000	329547000	329429980	346754000	320386000	339105000	353216000	366609000	355200000	343756000	328064000	344330000	336448000	364218000	343726000
YWHAE	7967450	2.5409e+06	3760270	5013680	7403930	3610210	4961215	3650320	5115535	4873080	2916380	5.09083e+06	8110900	8872143	7032480	8019580	3312860	2.35431e+06	5.38466e+06	4942870
ZC3HAV1	10357467	11416833	16955866	10234150	14834000	14246333	5888850	6797450	6278200	13303200	13484650	15731267	16662150	13303000	0	14920750	0	0	7151900	14273400
ZCRB1	4550850	4312910	2810520	4277960	3566260	4261420	2.52205e+06	760120	4206880	4095130	4453850	3.79625e+06	4798180	4044910	3.86355e+06	4595090	3.79757e+06	4057270	4460820	4363390
KRT16	4134150	4079030	4338030	3325400	4188810	3823030	2854970	3872440	3333340	3881750	3719500	4165300	0	3894860	4076430	4390770	4320650	4142680	0	3651980
KRT2	313142	275830	356190	245967	376559	270851	238017	251656	278720	311600	301639	259849	318472	302224	238861	281687	330182	243997	346447	195127
ZFYVE19	272097340	269001300	285809660	248084670	280023000	272203680	218333000	225038990	132299660	233674000	273383680	282200000	238895340	256830990	228443330	249489010	278017300	283089660	234445660	222148000
NFKB1	16325733	24282450	16588967	15989490	20881600	22436234	18744800	6414600	21835134	13513800	18954934	22455534	24924450	15945100	11555700	9662210	21914134	14551025	23384734	15025800
KRT77	464232	607745	388410	275485	580583	383184	398047	422966	531710	465022	593858	83059.4	348700	462964	540145	712329	500103	591871	454700	395667
ALB	273799000	294244000	284955000	257603000	312462000	233636000	258526000	265500000	255119000	287341000	278613000	289140000	288277000	291303000	293112000	271699000	282770000	271214000	279445000	281922000
ANXA1	10386433	11608867	7.14967e+06	9489923	10488833	9341650	0	8.3391e+06	8226320	10376093	9854100	13344300	12906800	10416200	7.56527e+06	4.13571e+06	12506300	8221920	10832800	11144700
ANXA2	19581000	17322200	20941100	15778100	18625700	17008100	15816100	16399600	16899300	10879800	18039300	17503400	19552900	11346467	17625500	17671900	17134900	17635900	6146800	18112000
NEO1	221491	236532	185835	213596	210639	197623	103737	268003	133771	265631	0	382865	272763	289191	240957	266930	186184	233929	267931	153375
APOA2	51666000	47274600	52733500	39805500	48538100	48928500	46581000	49377900	48872200	51067700	46780800	46156400	52495650	48192600	46256900	46701500	48101400	51630500	52867700	46421900
APOM	7162500	10158200	7609530	6589200	8485190	7894730	7744600	6406850	7907400	7390870	7152340	6886730	7361060	8124050	6509690	5596580	7941180	7048700	7908910	6984110
APOL1	10944633	11589700	11189200	8597510	11933033	11676900	8877313	11027633	8979260	11080800	9906193	11442300	11979867	11896433	12297133	10515573	11845133	12412200	12143300	9877700
APOH	584391	492870	490355	530454	445398	545968	429942	530202	539379	624072	501119	573060	580438	554949	505848	532653	519868	600930	506413	485848
APOF	1679130	1606090	1545130	1567320	1310650	1568470	1.30698e+06	1408030	1332040	1604190	1486900	1622350	1918270	1689330	1880410	1511600	1530180	1458280	1.63851e+06	1593920
APOD	31843166	30873600	30099466	24992234	27402034	27427266	25591300	30553934	28113834	31910634	25953834	31723500	29250734	31086400	28204000	30498834	29241234	28398434	32984600	25102900
IRGQ	10096123	11267767	12031000	10265400	11645500	10852033	10250600	10778933	10551100	7222154	10546667	3.91483e+06	11263633	11128667	10532967	10756667	11617933	11004800	11086400	11571500
APOC3	119537000	118368000	125816000	105318340	123725000	116262340	102584000	123901660	111068000	129577000	104397000	122992000	129889000	115238000	121242000	117401000	117990000	127654000	124347660	106676000
APOC2	35858170	35462668	35040500	27274600	34196100	31045666	27976666	32312866	33195700	34722100	30259666	34913132	36431200	34682132	32076334	35131030	33358300	35765600	34010100	29235866
APOC1	6146940	6533300	6513550	6421130	6205620	5591230	5247100	6547880	4904810	6986080	6204200	4987800	5096490	6516445	6882470	5399200	6742260	5564690	6301700	7228620
APOB	14701967	14084900	15087900	14117400	15082100	14106867	12826800	14036700	12561700	13963200	14987100	14714600	15571400	14898467	14814433	14942400	14098300	14018600	14367500	14296400
APOA4	9722645	9782290	10246865	9207050	9900345	8559195	9188275	9021555	9639565	8386570	9368530	10906140	9953685	11133780	9691910	9387350	9702080	10042015	10425155	8897005
APOA1	130526000	118227500	132500000	108756500	127972500	115577000	106598000	120537500	115194500	114964500	113603500	126599500	122765500	122578500	116977500	118572000	123256000	114782000	125135500	122141000
ANXA6	3357030	3273050	3389160	2494570	3397410	3020490	3005470	2995380	2982750	3430620	2741680	3361540	3536580	3397900	3257680	3028470	3230180	3555620	3394970	2835610
IGHV3-15	71143450	71016600	69229800	56405150	72621950	61086650	63667400	71419300	69819950	67903750	63575350	64215600	65868300	68172200	63974700	69133060	63801650	73138800	68195400	63102900
APLP1	29238334	0	33056400	0	11373133	10608533	22955100	28961600	17863934	28472500	29288100	0	32175900	0	30697600	29052700	21257734	31451500	10435500	30288600
APEX1	2.05e+06	2.26493e+06	2.6206e+06	2.57781e+06	2.84219e+06	3.05189e+06	2427990	2843930	2.02643e+06	2.6236e+06	1651570	2356820	1.57217e+06	2.05039e+06	3007400	3717560	1.77161e+06	2253510	2.36132e+06	2504480
APCS	3289225	3736390	3608545	2733770	3424780	2920500	3602440	3392880	3785680	3229260	3176695	3014970	3801840	2900565	3250455	3337380	3620350	3516325	3804970	2855165
ITGB2	2037750	3445660	3.68074e+06	2719570	1.10214e+06	2005440	2.38247e+06	3.16506e+06	1.76674e+06	2.52647e+06	1941651	1.23007e+06	3.31388e+06	18570.1	3.6419e+06	3578060	2.91957e+06	2033660	974060	2915210
ITIH1	7.31491e+06	6825010	6615130	5409790	5.95186e+06	6428800	5915590	6696710	6.1225e+06	5820750	6415880	6628770	6668540	6554840	6250910	7191810	6923240	7026940	6901890	6297840
ITIH2	7.35126e+06	7.72418e+06	7.35626e+06	6.58263e+06	6919090	6.64634e+06	6.52215e+06	6510330	6851030	6687790	6.74905e+06	7853260	7.19486e+06	7.52129e+06	7.63871e+06	6.85906e+06	7.76569e+06	6616800	8075580	6.68562e+06
ITIH3	4708980	4538965	4249880	4329130	4666760	4220875	3182170	4445800	4420400	4233040	4335440	4280420	4031170	4451270	4515750	4282690	3592610	3919530	4865840	4557450
ITIH4	2297160	2238460	2260200	2074780	1928900	2164280	1862370	1963260	1967235	1950220	2031460	2119410	2240810	2090740	2233190	1891970	2038465	2231080	2248830	1919910
VPS35	4863780	3976590	4680570	4293070	4411860	4359830	3797300	4054590	4455480	4713100	4156910	4250620	4863920	4904140	4221890	4475130	4087510	4999820	4884990	4243490
VPS35L	0	7559650	1620485	1.5996e+06	1.63992e+06	4034510	2.70185e+06	0	3.93693e+06	2.54666e+06	0	3331480	3082555	6407310	5001805	3.86814e+06	4123450	4306210	6970150	3.01741e+06
KRT8	3.18452e+06	3200580	3.68332e+06	1964120	3460730	3250120	2704170	3437040	2701000	3147700	3048640	3389530	3.13717e+06	3131320	2784630	3.53281e+06	3303860	3154130	3363820	3.2868e+06
AKR1B1	22374966	21036100	21019400	19632400	18850000	20819500	21957200	20936400	23158300	22664800	18933800	19900900	20476500	19915000	19817500	19335800	20852900	22714200	21550200	18864700
INTS4	44695900	37479400	0	0	44474900	46104600	27154300	38077700	31509866	45733400	34367170	12382367	44802068	36969068	44726500	40078332	0	47215100	45581100	38368500
MDH2	3.68523e+06	5830200	5.49091e+06	4.67105e+06	4.33658e+06	552870	5.942e+06	6408850	0	5207360	7.11106e+06	5160030	7.90042e+06	6.86584e+06	4.12682e+06	7514810	5.36339e+06	3.63217e+06	6884610	0
MAP1A	0	44146830	13196667	26072734	45023900	41894332	12699267	14281033	0	0	40535800	44104668	42462600	28823666	41142800	41616400	27355734	41997200	15127533	46045400
MAP3K20	7946730	8.06135e+06	9101850	0	8585630	1.50333e+06	0	6242950	0	6970250	8464200	0	8430093	5980320	7954810	0	7.98601e+06	8036030	9025030	5029680
ACTN4	34306600	15448753	23460934	14655200	31640434	30601300	31064534	25661500	19093180	32256466	26677334	35914000	35920800	30367034	21789066	0	34294800	35578700	33828668	27354200
MTOR	269146	209978	179002	150193	209709	215631	90861.3	222399	213637	195204	256293	137871	239424	214206	183879	175019	242642	156247	232375	240224
ACTBL2	2058070	2236710	2525810	2332540	2628710	2362540	1502980	2408250	2272575	2408675	2541630	2217895	2574530	2785260	2813485	2439500	2489450	2265570	3311810	2297260
ACTB	3.22299e+06	3329180	3399420	2889280	3.60936e+06	2583400	2.07033e+06	2697550	2668680	2929710	3211860	3338690	3.12575e+06	3365320	2.74975e+06	3403400	3435240	2.85092e+06	2.75255e+06	2746690
ACTA2	4099580	3400870	3.48477e+06	3.11383e+06	4.42073e+06	2.65592e+06	2.72325e+06	2.94333e+06	3015730	3.25079e+06	3.56783e+06	3.94382e+06	3.77173e+06	3.686e+06	3.35137e+06	3.46932e+06	3.71313e+06	2.7943e+06	3.63054e+06	3.3731e+06
MASP1	1643070	1491130	1.58846e+06	1.57353e+06	1487560	1457670	1033790	1333100	1214250	1335160	1277900	1.42403e+06	1431510	1462860	1.57182e+06	1555420	1604830	1484510	1459030	1376430
MASP2	1.23484e+06	1.06256e+06	1.26518e+06	1327910	1.23553e+06	1644170	926575	841061	1265070	1.08915e+06	1.01175e+06	1.64841e+06	1.28687e+06	1.05205e+06	1166478	1.17799e+06	1.09799e+06	1.1038e+06	1.06755e+06	1078756
MBL2	203653	108078	130233	122025	226451	139162	112221	136355	136320	100883	156039	177582	204174	173290	161798	150279	240134	152292	211148	178103
MT-ND2	49268500	59026300	56835700	47741100	49073400	43961300	51815500	53122500	45080300	55716900	0	51101900	0	0	52330500	46820700	57125400	55915600	55278700	47793800
ACE	1043110	708276	802528	652410	832303	878724	672673	878951	809634	873510	632333	926368	967419	858798	901783	965523	597441	938348	654289	387892
MX1	11505500	11459200	16507800	8492240	13389400	10002800	9268127	11694833	8.20725e+06	7.94382e+06	9628807	8777773	9654770	14062900	9141710	14182800	5883920	7523410	14893200	8383350
MSN	1.80206e+06	2779600	3.53557e+06	1403520	3.30489e+06	5022960	3467160	2856180	4.35387e+06	5237950	3814290	5678870	2424455	3.14501e+06	4680260	3217500	4904170	2204735	3.63107e+06	4864910
ACACA	4503950	4418030	4.48587e+06	3562310	4045190	3723200	3423380	3753140	3539200	3507840	3880280	4122680	4205220	4360080	3977630	3919310	4324710	4039490	4534580	4033120
MSL1	9801917	9971320	6662380	5.67387e+06	9677977	9814787	8753977	10027213	9747263	9786567	7639370	9790553	10953433	9705220	8601530	9048280	8971710	10001560	9177230	7639660
MSH2	6270580	4.34857e+06	6.64969e+06	8.00239e+06	2.69383e+06	5417980	9161230	6.51743e+06	6616160	8697410	10200000	0	10976800	10371500	6.88393e+06	9725190	7280580	2.96349e+06	7.28827e+06	8140170
ABCC2	0	1268377	1.18535e+06	1242120	1.30093e+06	1098300	837391	1.32707e+06	1395950	1265610	436587	1.30454e+06	1414260	438377	1461630	793487	1087500	931044	1.17188e+06	1088410
MRPS18B	39137900	0	14621933	40598100	51184200	47700500	0	35851430	43672000	23332934	38849600	48302668	39418800	41129300	38295100	32734600	39761400	53068700	51798700	49308300
MIA3	200598000	225849000	189627000	148320000	213234000	132710000	191893330	0	192397000	133989000	199550000	215409000	248741680	203298000	231052000	186666000	103840500	73647000	115171464	187641330
MPO	6173180	1934930	3.92969e+06	1.38626e+06	7058330	1.57555e+06	5266240	4134570	5.8826e+06	7289320	0	3.83499e+06	5.25623e+06	8.1009e+06	4.52566e+06	1.38228e+06	5.37637e+06	7.46097e+06	5.12293e+06	2.26167e+06
MMP10	1.76018e+06	1.15364e+06	1.29087e+06	1728500	2086740	2.0433e+06	1.27079e+06	1611690	2.21539e+06	1.10274e+06	1.29249e+06	2222220	1.48909e+06	1.9277e+06	1.40383e+06	1.80338e+06	2.40956e+06	1.14277e+06	1366510	2301520
MOSPD2	1.6096e+06	1026382	1.59282e+06	1442230	1412090	1.75903e+06	1187139	1519528	844319	1402210	1.73558e+06	1.661e+06	1.29749e+06	1304170	2221930	1246270	1.51641e+06	1.74354e+06	1.90636e+06	1.66105e+06
A2ML1	20453634	19064700	12786653	15427533	18253500	11824533	17493566	19488200	18177000	17936500	14991833	18763000	19941000	6424900	17597200	6019400	17000800	11929333	19965400	19085000
MAN2A1	72283000	57916570	58207900	47505100	58881100	58382100	54429800	53329800	52097900	52320100	47758200	58779800	58041400	59039800	51465600	58495200	62321700	58318332	61076500	50720600
MYH1	8399500	2.86886e+06	9760560	7731610	9133980	7801030	8151550	7949350	155461	7906370	9124010	8376880	8862963	9380970	8200450	9092860	9159330	0	9286360	8356500
AKAP17A	2395030	2.23353e+06	2.12198e+06	1499630	2341480	2465890	1640820	2318660	0	1.49909e+06	1829820	1728800	0	2059690	1.88188e+06	2011370	1562680	2136970	2425230	2.10043e+06
AFM	14668600	12914300	14959600	13294600	14536000	16901400	12026400	16224300	12629500	13405133	14608300	14119767	14860533	14763700	14331867	13766900	14186300	15237800	15157933	16541500
KRT9	67954	64226.5	79443	51390.1	75710.4	65343.6	15269.5	58492.8	33905.2	58617.6	55450.1	66997.5	70913.8	73300	56116	71666	84741.7	71097.5	61159.7	67145.2
AKAP12	217929000	203128000	219462000	164188000	219947000	199613000	145788000	196195000	196564000	202808000	175639000	204012000	200210000	205782000	180127000	196482000	193068000	210360000	228473000	207684000
AHSG	24420800	24193634	25172300	19367900	24500934	23771766	21611200	23180866	22691434	23812834	24100566	24286366	25378866	23970166	23780134	25370534	25132834	24675200	24820900	23393434
AHR	5279420	4.60684e+06	5454200	1932025	5737480	1.66746e+06	3.28057e+06	4.33913e+06	4141555	1779010	5172280	3546565	1567400	4740830	3.25825e+06	3.10063e+06	3816500	2.97727e+06	4659700	2.83923e+06
LBP	1280410	1429520	1700750	1250940	1604200	1144620	1328370	1296800	1675870	1437660	1.37958e+06	1.59863e+06	1490310	1666480	1364040	1194280	1550040	1210550	1440320	1234060
LCAT	1471600	1291810	1318290	1370700	1691240	1240980	1335920	1.32137e+06	1285570	1333550	1.40453e+06	1074880	1353040	1495100	1.35639e+06	1412000	1424170	1474130	1546880	1230310
AGT	4017190	4287680	4227440	3676560	4262160	3472550	3472120	4071470	3757240	3756600	3691130	4544750	4381760	4243530	3902230	3812640	4367370	3756640	4203380	3960990
LCP1	245898	227594	234783	187772	234356	175771	108220	179989	178225	168250	241913	171073	191653	299084	204990	245953	212337	269067	205013	256480
NAP1L1	14903600	23690400	23389100	13622800	23353000	20422866	12461367	20193000	17810854	17750200	23396400	21335500	24857834	11742967	20120134	12773867	14108335	23468500	18806134	22656700
LGALS3BP	1881640	1.81507e+06	1.53643e+06	1.73451e+06	1865110	1565100	1.64588e+06	1.8255e+06	1.77003e+06	1522780	1.69607e+06	1.68971e+06	1.83007e+06	1.65443e+06	1808440	1.96836e+06	1.78502e+06	1604760	1.84724e+06	1726260
NAGLU	26794700	24600800	26050500	18605400	15994100	22621700	20985400	22174900	22622400	24942400	20272300	28585600	12157900	25070600	19251300	22425900	23154800	29191400	24484900	13827800
LPA	2658900	2420810	2536000	3123060	3403670	2576040	2080080	3532160	2333310	2314030	3611210	3426860	3042040	2475290	2488590	2917690	3299790	3734000	3638180	2525320
ADAMTS13	1288810	1415060	1530140	1038360	1.44631e+06	710346	1084950	1071780	1.38068e+06	720540	967633	1257900	733753	1409720	1196090	1.39607e+06	1.21872e+06	1297620	1257840	1167550
LRG1	17416934	16275100	17782234	15631867	16761800	15860200	13895967	15916800	15903700	15801000	16468733	16530967	16601467	16763200	16394100	16893834	17090366	17413834	15565667	17205766
LRP1	2.85099e+06	2248580	0	1.42797e+06	3101480	0	2854820	2997610	3065390	1.8318e+06	0	2335710	2.9273e+06	3596660	1939900	1.89303e+06	3346870	2683500	3297090	2496600
LRP2	20011100	56701200	61683800	15918733	18886334	57052900	18515200	42490400	42996630	57909100	36086200	53453970	58322532	63455500	53418370	0	27753600	46919970	42298468	0
ADIPOQ	1148650	1398000	1232830	1221545	1383810	876076	1090810	1075230	1194290	1277160	1128060	1462610	1369140	1073755	1463460	1165930	1398190	1208170	1337550	1062870
MYO15B	91975200	95142600	100190000	86604800	98525900	70280500	86340800	89655400	76938000	86227100	89024800	71188100	0	78461600	105124000	98258200	93063300	0	0	93366600
MYL4	4317450	4184230	5492800	0	3796200	3962300	4682370	3956100	3560400	4.9668e+06	0	0	2726390	4622670	5061920	3.33783e+06	0	0	5168470	4321760
MYH2	184830000	106564000	174716000	159289000	179000000	180709000	166290000	174794000	179027000	180102000	175629000	184478000	179539000	177422000	174396000	176185000	104677000	172891000	187928000	0
MYH11	8379040	7.21444e+06	9036310	6.3695e+06	9696050	5.50351e+06	8510640	9122610	8648360	9539260	2646210	406760	8931647	8650060	2996060	8464803	8573540	9455590	8135970	7.90774e+06
LUM	3763830	3760460	4104100	3298320	3861840	3611690	3545850	3514740	3329040	3377300	3696320	3812500	3888000	3416090	3811250	3890320	3593850	3673110	3984430	3690040
LYVE1	13625400	14557000	13077500	11871200	13286400	10856300	12353300	10432600	11388000	11334700	12319300	13914100	13785800	11155900	13496200	12332300	14509100	13488800	14245300	10909100
LYZ	801401	727630	813912	825567	505905	801212	798934	793429	489825	622891	716380	734028	419018	788222	682285	811329	683125	830491	828588	877470
NUP98	1897000	1936960	2025290	1584940	1919960	1958380	1.59195e+06	1618490	1609010	1704210	1739830	2080970	1986620	1875170	1689680	1768940	1738010	1854070	1889890	1915470
ITGAL	2.1031e+06	1451120	1936180	1.63063e+06	1364180	1.72633e+06	0	2370270	1361946	1739900	1.96353e+06	2041770	1933530	2.24347e+06	1.86066e+06	1.65162e+06	0	1845380	1.94084e+06	942460
EPB42	208443000	64005664	136990000	107764000	0	193209000	182761000	189808000	131007336	209511000	177705000	187801000	208454000	196341000	127126664	127673336	183719000	200305000	192173000	211062000
IGKV1-33	30127800	29900900	23124230	27335834	27332600	26988166	24911266	26888000	26046900	12638590	29305866	30003300	29726800	28721466	29272700	20476956	30449000	13840530	30291466	30313300
TUBB2A	11919800	12427300	11385900	9347500	12145800	8126820	0	7975490	0	12467700	10618500	11468600	8526990	11080400	14673000	11259900	11602500	10803900	12359400	11437200
C9	3986450	3635220	3883100	2603780	3336305	3702725	2746130	3742530	3135760	3756350	3089280	3930955	3995210	3375000	3486320	3986130	3422850	3574710	3894940	3551140
IGKV1-37	37956030	39309830	47018770	41957200	47734100	17601080	35081970	22803066	35100300	23606400	36959170	49219970	39947370	38561900	39477068	41453300	30771866	36196900	41590732	43790430
IGKV1-5	25817900	25424500	27590634	21712600	25538434	25337100	23945500	23597100	22201800	25709800	25003900	26516000	25033800	24791300	23392100	25761400	26177000	25884100	26253400	25643700
PAICS	2170920	3110380	3479220	2.55194e+06	3250290	3210810	2654160	3191360	2.10307e+06	2.84012e+06	2716320	2.62038e+06	3473180	2923970	3224850	2.07511e+06	683337	2.85676e+06	2.41601e+06	2682460
OGDH	1.00935e+06	1.39855e+06	1677160	1204060	516053	1474490	1.07962e+06	463343	1.28407e+06	1.42929e+06	1.52787e+06	1.61433e+06	1.12415e+06	1542800	1.04457e+06	1528040	1.50247e+06	0	1.20652e+06	497780
IGKV1-8	255484	229716	276705	251386	328317	221550	182828	231166	239746	225134	259127	247773	241414	266168	262261	277858	195818	300302	253831	304014
IGKV2-24	22146366	21005200	23036300	19743200	22104900	22148066	18831000	21185600	19594400	20956666	20319500	21413500	22003366	20374300	21544400	21723900	21026700	20846434	22930700	22572300
CA1	324649	268691	229444	230206	287691	253169	224151	276935	242989	325519	199737	321291	241439	238065	199574	245517	413954	305143	264162	316366
TXNDC5	7132430	2.12794e+06	7472920	2091010	6949130	7021440	6581300	2.26374e+06	0	4.54419e+06	7.72112e+06	6231130	7941570	7410120	0	0	6748520	7700320	7577390	6773110
TYMP	2427880	0	2002940	0	2250030	773527	1633860	0	881320	2.12112e+06	2.40879e+06	1.60859e+06	2.05693e+06	1833580	1785550	852100	2287860	2.10484e+06	2.45024e+06	1.83568e+06
IGHV4-30-4	20328166	23389366	26304666	20711034	25537434	20263434	21628566	18070300	20907934	25366466	25747166	24076200	27345500	24369334	20695900	21269500	20963200	23895700	25642134	25524600
BCHE	2170660	1.86976e+06	2.01277e+06	1918230	1885860	2108950	1841040	1.99975e+06	1855580	1863380	2001850	1987250	2113860	1920360	1610170	1874370	1899230	1812800	1.89243e+06	1934750
BCAS1	0	811477	1116910	1016040	913383	1250680	937254	1336330	864900	733314	1110720	1196660	0	1192440	0	1190490	1293670	1135220	1272770	1042260
IGKV2-28	98659230	100023400	89062296	79488830	98149830	96228904	87811500	90337304	93327470	91868600	94560200	99141400	95192664	86525896	95677660	90247260	87600740	98213896	93807896	94159304
P4HB	1190620	863620	1.22862e+06	1214010	1.23214e+06	947425	1136710	1329680	1565430	1221260	1040580	1263820	785927	1.29477e+06	1609870	1224150	1216410	1113730	1486650	1.07376e+06
B2M	423404	415182	361769	288477	414112	367605	198435	408265	318951	342458	328756	413488	355792	361546	340765	415428	351702	337265	311208	338226
AZGP1	3308145	2875455	3097535	2629715	3050910	3024850	2392870	2999825	2858435	2714755	2998565	3048955	3178500	2953000	2670520	2808510	2735590	2858855	3053785	2852540
IGKV3-11	96918860	97562900	98352600	87810000	91402504	103719000	83007896	95187896	89134500	97915704	90487140	92374500	108759336	99641464	97961100	99354370	91956340	100283000	108399000	99182330
IGHV3-9	508000	595651	598857	164725	556392	588325	364828	788923	800151	636886	855804	634507	674868	612549	760952	201410	699743	407780	882250	181318
IGKV3-15	112677000	103870000	113221000	87265400	106226000	105548000	91849800	101046000	96631200	102365000	95715470	103061000	110150000	104627000	102333000	102497000	102020000	108227660	111455000	100157000
IGHV3-74	24957000	20481100	24334800	18096700	24443700	21956300	25501000	24192900	24230600	21589200	19494900	23483400	23208400	22175900	22506400	22824600	23368300	23984700	24272600	18209300
IGHV5-51	19570400	20478100	20974600	18643200	20634900	18871666	18468434	18830666	18945334	19335800	18506966	20460900	20606066	18766434	18872634	19276866	20021566	17980634	21697866	19066934
TUBB	70235200	74223700	78518200	74701600	79002200	72137300	63042800	76522900	60420500	66426400	69484400	61707900	72699600	31248100	63414100	48819300	71702900	77326000	71198800	63240800
BRD4	31814700	31318900	30583000	29984000	27278300	23802100	29583400	0	0	24619500	31370000	28419800	30963900	30451700	31533700	31286100	27931100	30431500	32858800	0
ATRN	2346230	2300520	2561610	2051510	2217350	1.99075e+06	2035440	2129850	2181250	2204450	2189000	2320610	2649650	2281930	2188710	2170250	2251790	2130720	2431510	2201190
TUBA1A	0	8608550	10001270	4.65988e+06	8742715	8927850	5346820	5.45182e+06	2558450	4666920	5979540	5.78307e+06	2.92949e+06	0	5731460	6.23907e+06	4.68758e+06	8960520	4.73605e+06	0
C4B	3852280	3590340	3716150	3333620	3416130	3556230	3257510	3349940	3275470	3440790	3335700	3758240	3628930	3591680	3778480	3475780	3831140	3556370	3526430	3.75894e+06
C4A	31437350	32982876	36164976	31334554	35623570	32720840	24723764	33298956	29747240	30880714	32504430	34296230	35118264	34318332	32622550	32177516	32457980	33794468	34065430	34588028
TTC37	15432700	13745767	9809267	8190400	10644667	8848133	13105200	7.89893e+06	9753400	5.88817e+06	4241800	4.56697e+06	14124667	10507700	13070000	14191100	13695933	0	9329200	15232700
IGHV5-10-1	3.37772e+06	2.94981e+06	3.09258e+06	2.21356e+06	2916270	2.32648e+06	2451560	3.23924e+06	2.36119e+06	2.20019e+06	2.34134e+06	2739760	3.3192e+06	2.49905e+06	3.44948e+06	2.91222e+06	2.41175e+06	2.742e+06	3.19102e+06	2410290
IGHV6-1	6078530	5483550	5135335	4247865	4985975	4281050	3956650	5123970	4182670	4428550	4363640	4424570	4628735	4454140	4518965	4370505	5063715	5406535	5656950	4472570
C2	909574	996267	931813	931139	1.02304e+06	1134050	1023550	1137430	1041360	1045990	1.0388e+06	976486	908065	1.07101e+06	898117	1019720	1013410	997732	962167	1118430
C1orf52	746428	745008	927646	0	757176	752554	547691	767368	615605	743768	604698	860134	715469	839302	559924	475402	0	705995	545215	848307
C1S	10867867	11194100	10517000	8592250	9011860	9730570	10839700	9926350	8572300	10242800	8401960	10845000	10968200	10029100	10884567	9933560	9938790	10550000	10273500	9368163
C1RL	3046050	2.83391e+06	3100390	2979940	2681680	3124890	2727340	2.57158e+06	2.79267e+06	2786720	2745150	2768310	2823370	2752930	2747860	3157640	2439280	2.76499e+06	2843260	2969380
C5	1247330	1088180	1227550	1035400	1161780	1035620	929146	1071510	1109690	1161380	1093510	1183990	1162790	1182720	1144810	1201270	1213820	1.07435e+06	1185360	1028940
C1R	1.54616e+06	1684680	1958010	1657150	2.00694e+06	1.76994e+06	1.65086e+06	1732830	1670590	1.69745e+06	1.91994e+06	1823810	1.6805e+06	1939460	1.50989e+06	1.72665e+06	1624870	1582670	1948530	1835620
C1QB	6999170	7175800	6906780	7190450	6438150	7840910	5513490	6330480	6669360	6649830	7582520	6757500	6629910	7685680	7723500	7764230	6175420	6937150	7726540	7634760
C1QA	9328050	9172753	10355033	8399047	9535833	8749970	7.33595e+06	8.20397e+06	8131480	8354240	8656593	9194260	10280733	8446953	9627557	8916923	9588707	8.13787e+06	9412913	8642960
IGKC	302939000	335146000	310209000	244079000	334337000	300969000	251776000	307391000	315845000	315029000	268944000	308093000	297662980	318207000	283908500	309630000	270384000	316323520	316533000	328728000
BUB1B	71511230	75700970	0	36277532	68615500	68416270	37476800	54944068	36100600	18398434	66371664	69204600	76020696	60631500	74098170	58231100	68417336	62968030	20859734	68090730
BTD	1148130	1.07707e+06	883981	896098	1019980	962380	1071810	989190	942031	983250	1031620	1051780	1073490	978714	1184330	1078570	984017	959249	1091360	1.03958e+06
C6	1338220	1044910	1208945	1020410	1126340	1347010	1102580	1101990	1059000	1072885	1120910	1185810	1080870	1053070	1037080	1240780	1256400	1203620	1244160	1175550
TTR	16438700	16678300	15495433	14903467	13930400	16095133	14741700	15284600	15108967	16947834	14594233	16591900	17977934	16201900	16091767	14823700	15622167	17075400	16516300	15338900
IGHV4-4	5.66364e+06	4341860	5782530	5059690	5052270	3884360	4795680	5.15026e+06	4.40252e+06	4660810	4.45505e+06	6.03795e+06	5.13993e+06	5.02268e+06	5570150	5027470	5138570	6318490	6530430	4494760
IGKV1-12	13150967	14019800	14615067	11900500	13630100	12134800	11951267	12707400	12686533	13484367	11937900	14418833	13697567	12279967	14295433	12290367	14233333	13368900	14051500	14042500
C7	3.71713e+06	3.64978e+06	3.95915e+06	3650710	3838430	3701640	3708000	3505240	3450880	3.34593e+06	3527680	3.69435e+06	3.85063e+06	3627370	3.4737e+06	3741060	3.47213e+06	3854060	3.96627e+06	3562880
C8B	1.86605e+06	2177250	2032990	2041670	1925260	1.81203e+06	1791590	1837090	1948020	1769060	1916760	2043750	2092800	2081200	1.96631e+06	1882720	2133090	1818500	2.15813e+06	1.89392e+06
C8G	3385480	3478810	3635500	3293990	3467100	3611090	2764460	3377260	3200550	3282970	3552020	3397350	3594720	3552620	3390440	3783490	3690030	3615950	3370970	3769410
ATXN10	2679475	6935480	6.07527e+06	7578190	2.61323e+06	5732965	3974420	3261360	7074810	7709150	5615455	6952460	4569060	4.90137e+06	2666740	7395220	7594990	2.58332e+06	8150400	4.92902e+06
IGKV3-20	69090000	65067800	71214500	60185000	60665400	63383850	63521000	65815600	63914300	60857200	62284000	63803800	59977900	65906900	61239600	63479600	61883400	65515100	67150000	65819600
IGKV3-7	46169170	46626668	54795136	37345800	53100030	50942230	41169332	43124300	44181068	46146468	42653830	54468600	54037532	48812132	46745532	49938700	50723030	47151030	52897630	50924900
IGHV3-64	876130	2.12037e+06	2.03198e+06	1421480	1.07254e+06	2.19623e+06	637660	1.59968e+06	2439020	1.12502e+06	1553580	2.133e+06	2491890	1.3698e+06	2.12859e+06	1282210	1898775	1.3272e+06	2509470	1.5595e+06
IGLV1-51	2407370	2219190	2.43271e+06	1839100	2385390	2120290	1.50549e+06	2093770	1.94035e+06	2.07711e+06	2299140	2.45313e+06	2.50107e+06	2.15445e+06	2.28508e+06	2172500	2.27691e+06	2412050	2.36144e+06	2.25595e+06
IGLV2-11	7110580	6882510	7049365	5427345	7341420	6984570	6636630	7453665	6471720	7003730	6877830	7068730	8192200	6399960	6237645	6967645	7267180	7681755	7036270	7000905
IGLV2-18	3829960	4412440	3.99797e+06	3.70516e+06	3549830	4.26017e+06	3.47318e+06	3898940	3722120	4.15071e+06	3.58613e+06	4227060	4.35337e+06	4.02432e+06	4122170	4119440	3.75571e+06	4.10418e+06	4.15999e+06	4.09775e+06
OSBP	5.15784e+06	7798660	5577730	6.18779e+06	5230810	8158455	4.14422e+06	4817670	6634510	3159885	4697540	4403200	7218560	7753120	8308430	8.2326e+06	6.88929e+06	8.32964e+06	5.04449e+06	4.42809e+06
ORM2	71348700	72330650	68503896	57918500	67801150	69565496	63344900	68489200	68330100	69587950	61083504	70789100	71181600	67235800	68557250	65778600	66138300	72376600	72627850	65818148
IGHV3-49	13877200	12181067	12174210	9443100	12813600	11476267	10509467	10857017	12563300	10491567	10725950	13712900	12850633	13408900	12528433	11535033	11620833	11961133	11872117	11833233
VASN	32795200	30169500	30010766	18125200	32141200	29115600	15920700	21329200	18793800	25979000	26187734	29932900	29957200	29898166	30287500	21686800	31121000	20440000	29639700	28491866
IGHV3-38	5124640	5147940	5.1544e+06	4858690	5125580	4812120	3.61045e+06	4853850	4607200	5.61852e+06	4637920	4.77251e+06	4919800	4140620	5234240	4.96041e+06	5077060	4423010	5225540	4647570
IGLV3-16	28566066	28880534	29097666	26086734	31243800	27708834	23450134	30280934	28918600	28493034	28410000	30041100	30672934	29544366	26008266	28167834	28588566	30175566	29439700	30107334
IGLV3-21	16354733	16347100	16561800	13357267	15117633	15572267	11600367	15537167	12918433	14892967	14039733	14906933	15064100	14981833	14836933	15983533	15712300	15161233	14841367	15837267
ORM1	62496400	63946200	59231970	52763370	61263370	60669000	57262300	61943732	62223596	62610030	56395468	64659600	63224336	60249230	61472770	59769868	58947570	64285970	64374700	60450132
CAMP	172864	254265	245237	200908	223700	186415	161200	153427	163930	181765	203862	219788	218411	247432	183565	184854	238964	202550	227796	204425
IGLV6-57	1901200	1717440	2024315	1403665	2074480	1442060	1364960	2256270	1410090	1764550	1711500	1882920	1952590	1746840	1796900	1741330	1843060	1461775	1816170	1638670
IGLV7-43	15622300	12250200	13601200	11500800	14762400	12102300	12972000	13580000	14196600	14649700	11323300	14825300	13861100	12342500	13813700	13167900	14217300	14287400	14923200	13249000
IGLV8-61	6.45684e+06	7.6897e+06	6.59759e+06	5217780	8395610	6.15976e+06	5.73162e+06	6.25725e+06	6110670	6506940	7919430	6002830	6136830	6892670	5.73938e+06	6064960	6132010	8025780	8595410	5677250
IGLV9-49	2.40981e+06	3603800	4.17425e+06	2.54219e+06	4.03139e+06	3529970	3.42348e+06	2.48904e+06	2381350	3.08827e+06	2499370	2.74101e+06	3.29306e+06	2.50567e+06	3.46959e+06	2.30823e+06	4.03415e+06	2.44251e+06	3357770	3.3892e+06
OIT3	6.60529e+06	9493380	8761300	6.33597e+06	9087567	8192350	7174080	4762800	8836860	8.16575e+06	8707443	9728610	10048000	9563703	6110100	4.97941e+06	8030040	7528970	9693040	8987560
INA	5588000	5.59848e+06	5.73015e+06	4345640	8884415	9643760	0	6453040	8725870	4685795	8191150	6705600	8888445	7.68477e+06	4.98113e+06	10271000	3737710	8.02711e+06	5425950	7012695
INO80	831723	889314	0	740722	900889	1034290	631803	835343	722614	807528	1041530	926001	843481	883396	979027	805045	823627	853524	961431	911709
ARG1	7896770	9787380	8364890	7902920	9067830	6040740	8131450	6988770	9296240	8361210	8710710	9722540	9411350	8819580	8590730	8381060	9095360	7004530	9099240	6955260
IGHV3-30	5189660	5120880	5196500	4315790	5.22822e+06	4953920	3977310	5609580	4759860	5369940	4.95011e+06	5574760	5696580	4542500	5121370	4722200	5.34029e+06	5263580	4709780	4988730
IGHV3-23	76206000	74498000	75955464	63216000	71471736	69434000	62945970	68486264	61848430	70126970	68694470	77389770	75284300	70511830	73712936	71609970	76101300	67988600	76481200	69905464
CAPG	4.94087e+06	4.62839e+06	3.26714e+06	1.42681e+06	4.59304e+06	1675800	3922120	4795870	4.11823e+06	3695710	3216040	4.99445e+06	4.90049e+06	3252300	3.07299e+06	4.65991e+06	5109360	4.67517e+06	3437020	2.92707e+06
IGKV3D-15	13860533	11783837	13588100	10665767	13414900	11666167	10928400	10894300	11585433	13317933	11400567	14003700	14042267	13454033	14026600	13645367	12008200	12455467	13745900	11007000
IGLV1-47	29985400	32859800	31140700	28320200	36377900	27694600	29624200	32265900	25574600	36507700	26894300	39826600	31285500	26912400	26219500	38267400	32696300	29590200	28807700	35660400
IGLV1-44	2.6009e+06	3121100	4.0726e+06	2883820	3.57425e+06	2687410	2627500	3090330	3.74693e+06	2642760	2680600	2836680	2464250	2.65142e+06	3189550	3247220	2815980	3683840	2719300	1649480
IGHV3-7	69747200	68024400	69499300	58460500	66479200	63564100	56886100	61433230	57077300	63868500	63008700	71461800	68694800	64059400	67393500	65780300	70654200	62395100	69145000	64186400
IGKV3D-20	26973334	26878334	24417266	21436734	24217300	22123634	20853400	26401000	22869600	23267500	21356800	22667734	25304634	26986500	26217300	25844934	22377200	22461200	26835566	22378534
IGKV4-1	58801800	57340800	51371500	54164400	54318400	45196050	45467900	54442800	47792200	50659000	50658750	50171000	53299900	56406750	59276700	48672900	50344950	47151250	55727150	46225400
ATP5PF	754111	762335	684082	371311	315690	868125	631150	456654	724367	781820	596315	364540	0	0	407820	689754	905661	882733	365816	331760
IGKV6D-21	1096810	1420570	1159320	1145880	1482070	1025070	916513	1442460	1.15542e+06	1004880	1457570	1396210	1261950	1429600	1070400	1355770	1433180	1090440	1334490	1361290
IGLC1	124962000	134107000	124648000	126193000	128062000	126496000	105213500	125209000	114140500	120418000	129716000	133635000	131981500	121781000	133982504	120549000	129782500	130646000	126005000	129805000
UGGT1	14874300	16326667	15188000	8873933	14352733	12088200	8550267	14857500	13326400	12958033	14543867	15115533	10857387	14473267	13917400	14369633	15151233	13616400	15765000	10425467
IGLC7	555147	611527	5161660	629933	464018	5988810	272711	0	529530	642367	482232	5432450	541195	556484	4373310	584836	496803	541497	648528	0
IGLL5	316598000	350461980	294779680	328693000	326495000	295827360	331496670	379729660	383472320	383356000	358973660	377897000	350768670	277136000	357022340	310950340	361698980	367750340	336591000	354507000
IGLV1-36	3.69804e+06	7.78321e+06	8666673	6454920	7.74945e+06	6372220	6199660	9368103	5.62446e+06	5.31968e+06	7.89251e+06	7525350	6.61359e+06	7.14736e+06	7630340	7.35565e+06	7.67812e+06	6.82787e+06	7.36985e+06	7.4331e+06
C4BPA	13041000	12556500	13786100	11527900	13262100	12872600	12324200	13307400	12582400	13113800	10891300	13154200	12883300	12440200	11766000	11904800	11797500	13126900	12318800	10180000
UQCC1	0	548064000	569008000	498468000	533602000	503306000	503012000	505388000	546654000	498761000	511493000	429479000	572766000	533390000	526236000	501616000	518684000	513208000	569921000	517279000
IGLV1-40	2.55755e+06	931349	2.28533e+06	685613	2.46774e+06	1.40375e+06	2392150	1876160	2.5469e+06	2.47038e+06	1.71204e+06	2352180	1.687e+06	1902510	1336220	1742450	3058460	2.41054e+06	1726940	1592560
ASS1	1140150	1279105	1237600	922120	2191400	1327025	787385	1272240	1925800	967056	1.36137e+06	1.73555e+06	1071134	1702030	963923	1445350	641920	559720	929027	1.17283e+06
USP14	7309170	5.13119e+06	7732370	5.9775e+06	7223420	4998600	6106810	7175040	6.35758e+06	6387870	7399830	7555940	7123760	7109410	7710270	5.40581e+06	7098800	6951090	7996740	6671660
IGHV3-64D	8575320	7605070	8.2046e+06	8636120	7583340	7.23831e+06	6574620	6944820	7144950	6978020	7164630	8743580	8443690	6715860	7997070	7982900	7.93844e+06	9320640	9190370	6704390
MRPS25	139744	156955	107906	72197.3	137319	27060.2	84138	0	27190.3	111446	29511.8	108757	86531.3	148304	122397	150272	147937	0	179521
RAP1A	21241200	20949950	20567450	5255850	10142950	20116200	12117000	0	4.41018e+06		20739150	11103700	20704900	19955100	0	21009066	20792000	21398800	19165650	10577950
MFGE8	2081220	3.18751e+06	2.10815e+06	2.46524e+06	2661580	2.59595e+06	2286390	0	2394830	3334270	2.34742e+06	1.90271e+06	1047420	2728740		2504640	2268440	2.66768e+06	2741620	2.25721e+06
MST1	1118090	479284	862832	825850	927890	716380	924384	365825	336385	1138780	669222	1233750	1508970	887988	484470	1056730	1156520	971204	506289
RACK1	6.93063e+06	17334134	14969800	12887000	11673433	19649334	9958200	5.86083e+06	13377520	9817613		13098500	18955566	20293500	19939734	11575100	19744666	16485100	6982300	12371970
RASA4	90015100	97077300	90300570	0	88138800	69564460	26757934	86984500	0	88263100	68731900	94967500	78938300	29369866	89144400	0	88950100		45631600	23948298
MINPP1	55822900	37471400	72321200	0	77049200	11681800	49739600	13185667	36378800	36810900	64793500	53997800	66215000	29749200	57555200	65311230	25370466	75191304		56516800
ENPP3	26097900	20376434	0	18121400	7.56037e+06	23106700	20741766	18574800	7.28563e+06	19719034	20024234	9804033	23156434	20125300	0		23234000	14860000	17363134	21674700
ME2	34184400	37667800	33714700	31345834	21846734	26898734	27526400		30233766	9999367	29582500	0	12320367	29026634	22036334	20912534	35147200	27675366	35607800	27404434
MED30	51417100	48721100	45579500	43430400	25175500	45530170	29531466	23410300	42533900	41749668	46560900	44577770		47737800	35909100	47076000	46035350	32875800	33919332	45499750
EPS8L2	41578900		0	0	36870900	31796500	24142200	34471100	36385300	28323800	29900700	29574600	37787200	33902600	35590800	35707000	0	34390200	42502300	0
[truncated: 5,036 more rows]

## Sheet: 6.Raw_Peptides
Protein.Ids	count	cv	Abundance	Coefficient of Variation [%]	Abundance_Rank
[truncated: 37,398 more rows]

[truncated: 6 more sheets: 7.High_CI_Peptides_STAVER, 8.Peptides_CV_Compare, 9.Spearman_Correlation_Rawdata, 10.Spearman_Correlation_STAVER, 11.Protein_CV_Compare, 12.Protein_CV_Summary]
