# Supplementary material for: STAVER: A Standardized Benchmark Dataset-Based Algorithm for Effective Variation Reduction in Large-Scale DIA MS Data
Source: Research Square preprint supplement (doi:10.21203/rs.3.rs-3111384/v1), 2023-07-10
Supplement: Supplementary file 3 [file 9f6d5e32786989a835e05507.xlsx]

## Sheet: Legend
Table S2 presents a systematic analysis of eight qualty control (QC) data and results to evaluate the generalization performance of the STAVER algorithm, in relation to Figure 3.
The description includes the following key components:
1.Spearman_Correlation_Rawdata. The Spearman's rank correlation coefficient for raw data is 0.75 (IQR = 0.74-0.77).
2.Spearman_Correlation_STAVER. The Spearman's rank correlation coefficient for STAVER-processed data is 0.92 (IQR = 0.90-0.93).
3.Protein CV_Rawdata. This sheet presents the frequency and coefficient of variation (CV) of proteins in eight raw quality (QC) control data.
4.Protein CV STAVER. This sheet presents the frequency and coefficient of variation (CV) of proteins in eight STAVER-processed quality control data.
5.Protein_CV_Compare. This sheet compared the coefficient of variation (CV) of proteins in raw data and STAVER-processed quality control data.
6.Protrein_CV_Summary. The number and percentage share of protein identifications in raw data and STAVER-processed data at a specific CV threshold, respectively.
7.Scatter_Plot. This sheet contains the LFQ intensities of three proteins (C1R, F5, C8G) for the eight QC datasets.

## Sheet: 1.Spearman_Correlation_Rawdata
	Exp112124	Exp112119	Exp112125	Exp112126	Exp112122	Exp112123	Exp112121	Exp112120
Exp112124	1	0.765584	0.807214	0.770918	0.725482	0.796795	0.753584	0.76268
Exp112119	0.765584	1	0.746068	0.722988	0.756396	0.749545	0.776913	0.786181
Exp112125	0.807214	0.746068	1	0.771978	0.736876	0.761618	0.748433	0.76174
Exp112126	0.770918	0.722988	0.771978	1	0.711529	0.763921	0.740793	0.727001
Exp112122	0.725482	0.756396	0.736876	0.711529	1	0.71678	0.712117	0.730226
Exp112123	0.796795	0.749545	0.761618	0.763921	0.71678	1	0.737485	0.749495
Exp112121	0.753584	0.776913	0.748433	0.740793	0.712117	0.737485	1	0.765304
Exp112120	0.76268	0.786181	0.76174	0.727001	0.730226	0.749495	0.765304	1

## Sheet: 2.Spearman_Correlation_STAVER
	Exp112126	Exp112124	Exp112119	Exp112125	Exp112121	Exp112120	Exp112122	Exp112123
Exp112126	1	0.928002	0.893714	0.943653	0.8969	0.904783	0.897092	0.901304
Exp112124	0.928002	1	0.918871	0.951373	0.911067	0.910387	0.90407	0.922267
Exp112119	0.893714	0.918871	1	0.915011	0.918023	0.928304	0.926033	0.925572
Exp112125	0.943653	0.951373	0.915011	1	0.889662	0.917094	0.909784	0.922734
Exp112121	0.8969	0.911067	0.918023	0.889662	1	0.93291	0.912758	0.901397
Exp112120	0.904783	0.910387	0.928304	0.917094	0.93291	1	0.904475	0.927472
Exp112122	0.897092	0.90407	0.926033	0.909784	0.912758	0.904475	1	0.89849
Exp112123	0.901304	0.922267	0.925572	0.922734	0.901397	0.927472	0.89849	1

## Sheet: 3.Protein_CV_Rawdata
Gene_ID	cv	count	Abundance	Coefficient of Variation [%]	Abundance_Rank
ALB	0.0662072	7	39221377054	6.62072	1
IGHG1	0.0885952	7	4993149059	8.85952	2
APOA1	0.0646386	7	4898947458	6.46386	3
TF	0.0529567	7	3173789536	5.29567	4
IGHG2	0.100192	7	2801430973	10.0192	5
C3	0.0589014	7	2452687535	5.89014	6
A2M	0.0656812	7	2144764205	6.56812	7
TLN1	0.464622	7	2016701145	46.4622	8
SERPINA1	0.091103	7	1720192895	9.1103	9
FGA	0.0652615	7	1667782761	6.52615	10
FGB	0.0860658	7	1628256574	8.60658	11
IGKC	0.243479	7	1533923153	24.3479	12
IGHG3	0.171415	7	1433445047	17.1415	13
IGHA1	0.199331	7	9.79048e+08	19.9331	14
APOB	0.0811801	7	9.66566e+08	8.11801	15
HPX	0.0696392	7	9.56757e+08	6.96392	16
TALDO1	0.118997	7	9.34924e+08	11.8997	17
C8A	0.351839	7	9.16725e+08	35.1839	18
HP	0.188854	7	8.92047e+08	18.8854	19
IGHM	0.122093	7	7.93509e+08	12.2093	20
FGG	0.151916	7	7.38203e+08	15.1916	21
IGHG4	0.321239	7	6.37229e+08	32.1239	22
LGALS3BP	0.159189	7	5.04507e+08	15.9189	23
IGHA2	0.185848	7	4.85316e+08	18.5848	24
VTN	0.172805	7	4.18052e+08	17.2805	25
CP	0.0975459	7	402037145	9.75459	26
GC	0.333564	7	3.98248e+08	33.3564	27
SERPINA3	0.169181	7	3.77256e+08	16.9181	28
HBB	0.161571	7	3.5831e+08	16.1571	29
FN1	0.104422	7	3.5278e+08	10.4422	30
HBA1	0.398802	7	3.4836e+08	39.8802	31
C4B	0.109227	7	3.39783e+08	10.9227	32
C4A	0.116113	7	3.37708e+08	11.6113	33
SERPING1	0.49908	7	3.10087e+08	49.908	34
APOA2	0.149796	7	2.96138e+08	14.9796	35
ITIH2	0.443751	7	2.85069e+08	44.3751	36
APOA4	0.107921	7	2.62683e+08	10.7921	37
SERPINC1	0.0729739	7	2.61035e+08	7.29739	38
TGM3	0.865823	4	2.60632e+08	86.5823	39
KRT14	0.615552	7	252353190	61.5552	40
CLU	0.0889845	7	2.45422e+08	8.89845	41
DTYMK	0.0396499	5	2.19028e+08	3.96499	42
KHSRP	1.8538	7	2.13995e+08	185.38	43
ITIH4	0.0948989	7	2.12701e+08	9.48989	44
SERPINF1	0.505739	7	2.10325e+08	50.5739	45
HRG	0.181263	7	1.96555e+08	18.1263	46
IGLC2	0.203188	7	1.94516e+08	20.3188	47
IGLC3	0.203016	7	1.94463e+08	20.3016	48
HPR	0.13594	7	1.92059e+08	13.594	49
APMAP	0.269232	7	1.87304e+08	26.9232	50
IGLL1	0.0761031	7	1.83789e+08	7.61031	51
PZP	0.125707	7	1.83509e+08	12.5707	52
APOE	0.117435	7	1.82404e+08	11.7435	53
F2	0.294512	7	1.73995e+08	29.4512	54
CFB	0.171957	7	1.70872e+08	17.1957	55
IGLL5	0.14853	7	1.62378e+08	14.853	56
SEPTIN2	1.11186	7	1.54734e+08	111.186	57
LAMC1	0.825645	7	1.51093e+08	82.5645	58
APOC3	0.0970739	7	147436546	9.70739	59
KRT16	0.541182	7	1.43951e+08	54.1182	60
AGT	0.350277	7	141542219	35.0277	61
ITIH1	0.0637875	7	1.41223e+08	6.37875	62
KRT1	0.599428	7	1.39791e+08	59.9428	63
COL5A3	0.479209	7	136396846	47.9209	64
HBD	0.0939031	7	1.32307e+08	9.39031	65
AHSG	0.164566	7	1.27948e+08	16.4566	66
MYH14	0.847547	7	1.26149e+08	84.7547	67
IGLC7	0.152154	7	1.25233e+08	15.2154	68
IGLC6	0.162591	7	1.24246e+08	16.2591	69
CFH	0.153658	7	1.23678e+08	15.3658	70
TTR	0.127083	7	1.22866e+08	12.7083	71
KNG1	0.080915	7	1.22321e+08	8.0915	72
ORM2	0.586215	7	1.15132e+08	58.6215	73
GSN	0.121847	7	1.14385e+08	12.1847	74
C5	0.140675	7	1.13104e+08	14.0675	75
AKR1B1	1.13185	7	1.08376e+08	113.185	76
F9	0.0722881	7	1.05121e+08	7.22881	77
ORM1	0.141105	7	1.01957e+08	14.1105	78
A1BG	0.335854	7	1.00875e+08	33.5854	79
SERPINF2	0.199637	7	1.00721e+08	19.9637	80
IGLC1	0.194062	7	9.96168e+07	19.4062	81
IGKV3-20	0.20064	7	9.658e+07	20.064	82
KRT10	0.399842	7	9.38242e+07	39.9842	83
MCAM	0.608303	7	9.13189e+07	60.8303	84
KRT17	1.59291	7	8.95791e+07	159.291	85
IGKV3D-20	0.202619	7	8.43076e+07	20.2619	86
ITIH3	0.576721	7	8.36811e+07	57.6721	87
PLG	0.319741	7	8.30164e+07	31.9741	88
FLNA	0.817908	7	8.1707e+07	81.7908	89
KRT6A	0.159497	7	8.07839e+07	15.9497	90
ZFYVE19	0.871821	6	8.04016e+07	87.1821	91
PON1	0.113156	7	7.71912e+07	11.3156	92
KLKB1	0.486564	7	7.51382e+07	48.6564	93
HSPG2	0.512459	7	7.43995e+07	51.2459	94
CHL1	0.145823	7	6.98541e+07	14.5823	95
QSOX1	1.20069	7	6.94372e+07	120.069	96
TMEM256	0.167397	7	6.79248e+07	16.7397	97
C4BPA	0.182198	7	6.69127e+07	18.2198	98
PRKAB1	0.582893	4	6.65919e+07	58.2893	99
SAA4	0.419994	7	6.6188e+07	41.9994	100
RAB10	0.537598	7	6.52522e+07	53.7598	101
APOC2	0.255848	7	6.42701e+07	25.5848	102
AFM	0.100962	7	6.38004e+07	10.0962	103
SERPIND1	0.221753	7	6.35417e+07	22.1753	104
SGTA	0.190724	7	6.28292e+07	19.0724	105
PTGFRN	0.925011	7	6.18097e+07	92.5011	106
MRPS18A	0.166382	5	6.04911e+07	16.6382	107
TFAM	0.443834	7	5.93002e+07	44.3834	108
CD14	2.20889	7	5.52139e+07	220.889	109
DSG1	0.840176	7	5.46594e+07	84.0176	110
LCP1	0.66089	7	5.41378e+07	66.089	111
FTL	1.60561	7	5.369e+07	160.561	112
APCS	0.127899	7	5.34706e+07	12.7899	113
IGKV4-1	0.513532	7	5.29161e+07	51.3532	114
APOH	0.163791	7	5.04939e+07	16.3791	115
THOC6	0.293213	7	4.7461e+07	29.3213	116
LBP	0.102316	7	4.66551e+07	10.2316	117
RASA4	0.0952537	7	4.663e+07	9.52537	118
RASA4B	0.0952537	7	4.663e+07	9.52537	119
KRT6C	0.291016	7	4.63047e+07	29.1016	120
KRT6B	0.281861	7	4.62003e+07	28.1861	121
CPB2	0.658719	7	4.60127e+07	65.8719	122
C9	0.17099	7	4.58242e+07	17.099	123
AMBP	0.187052	7	4.54682e+07	18.7052	124
TMSB4X	0.473005	7	4.54373e+07	47.3005	125
PLEC	1.02253	7	4.52274e+07	102.253	126
ATRN	0.854996	7	4.42422e+07	85.4996	127
IGKV2-30	1.06373	7	4.29099e+07	106.373	128
AZGP1	0.288035	7	4.27471e+07	28.8035	129
C7	0.432205	7	4.18194e+07	43.2205	130
VASN	0.410056	7	4.16109e+07	41.0056	131
ACTR1B	0.644069	7	4.15039e+07	64.4069	132
KRT5	0.296295	7	4.12338e+07	29.6295	133
SERPINA6	0.102351	7	3.9376e+07	10.2351	134
IGKV3-11	0.158836	7	3.93433e+07	15.8836	135
IGKV3D-11	0.158836	7	3.93433e+07	15.8836	136
GSPT1	0.682686	5	3.92499e+07	68.2686	137
GSPT2	0.682686	5	3.92499e+07	68.2686	138
C1S	0.0690136	7	3.9209e+07	6.90136	139
IGKV3-7	0.0801182	7	3.8884e+07	8.01182	140
HBZ	0.922346	7	3.88654e+07	92.2346	141
YWHAB	0.897573	7	3.85157e+07	89.7573	142
MAN2A1	0.380707	7	3.77395e+07	38.0707	143
COL6A3	0.427881	7	3.74809e+07	42.7881	144
RBBP5	0.130029	4	3.71493e+07	13.0029	145
LUM	0.274883	7	3.70078e+07	27.4883	146
PRSS3	0.328623	7	3.60796e+07	32.8623	147
IGFALS	0.419685	7	3.58746e+07	41.9685	148
MRPS18B	0.155755	5	3.56982e+07	15.5755	149
ALDH9A1	1.35337	7	3.55916e+07	135.337	150
LAP3	1.33019	6	3.55712e+07	133.019	151
MIA3	0.992227	7	3.54838e+07	99.2227	152
LRG1	0.175866	7	3.53938e+07	17.5866	153
GDI2	1.12834	7	3.53131e+07	112.834	154
RPS23	0.174337	6	3.51191e+07	17.4337	155
JCHAIN	0.178592	7	3.43759e+07	17.8592	156
BTD	0.385903	7	3.43059e+07	38.5903	157
IGHV3-7	0.199371	7	3.41672e+07	19.9371	158
IGLV3-19	1.06762	7	3.36465e+07	106.762	159
AKR7A3	0.145815	4	3.33271e+07	14.5815	160
RPS3	1.51586	7	3.29231e+07	151.586	161
PPM1B	1.97853	5	3.27903e+07	197.853	162
AKR7L	0.135025	4	3.2546e+07	13.5025	163
PCMTD1	0.145886	4	3.21814e+07	14.5886	164
IGF2R	0.561239	7	3.20892e+07	56.1239	165
DARS1	1.62139	4	3.17967e+07	162.139	166
NXF1	0.302857	7	31725050	30.2857	167
COL12A1	0.223819	7	3.15808e+07	22.3819	168
KIT	0.245938	7	3.13025e+07	24.5938	169
VCP	1.66618	7	3.1256e+07	166.618	170
POSTN	0.139011	7	3.09452e+07	13.9011	171
HSP90B1	0.764542	7	3.02993e+07	76.4542	172
RPL35A	0.735998	4	3.01274e+07	73.5998	173
DECR1	1.16911	7	2.9959e+07	116.911	174
GPI	1.41279	7	2.99189e+07	141.279	175
RMC1	0.193839	7	2.94166e+07	19.3839	176
KRT9	0.27161	7	2.92142e+07	27.161	177
C8B	0.088338	7	2.91846e+07	8.8338	178
MEAK7	0.175784	4	2.87084e+07	17.5784	179
PROS1	0.16106	7	2.86885e+07	16.106	180
VWA8	0.205296	7	2.80788e+07	20.5296	181
C1QB	0.296718	7	2.79054e+07	29.6718	182
DIP2B	0.0696796	4	2.69061e+07	6.96796	183
ARHGEF2	0.090164	4	2.66793e+07	9.0164	184
HBG1	0.234673	7	2.65418e+07	23.4673	185
HBG2	0.235473	7	2.64061e+07	23.5473	186
ALOX5	1.24671	7	2.63169e+07	124.671	187
GAA	0.711453	7	2.60129e+07	71.1453	188
PKM	0.580756	7	2.60073e+07	58.0756	189
PGK1	0.973375	7	2.59968e+07	97.3375	190
ENPP2	1.24661	5	2.59918e+07	124.661	191
IGKV3-15	0.164855	7	2.59312e+07	16.4855	192
KRT79	0.296294	7	2.57068e+07	29.6294	193
IDH3G	0.200274	7	2.56895e+07	20.0274	194
HBE1	0.242252	7	2.56561e+07	24.2252	195
GTF2I	0.547878	7	2.56115e+07	54.7878	196
TXNDC5	0.277433	7	2.5357e+07	27.7433	197
APOC1	0.119516	7	2.53181e+07	11.9516	198
VWF	0.332954	7	2.5289e+07	33.2954	199
MINPP1	0.191177	7	2.52485e+07	19.1177	200
C6	0.119344	7	2.51984e+07	11.9344	201
IGKV1-5	0.291073	7	2.5089e+07	29.1073	202
PTPRA	0.509554	6	2.50424e+07	50.9554	203
CYFIP1	0.151186	6	2.49204e+07	15.1186	204
LTF	0.346332	7	2.4872e+07	34.6332	205
UGGT1	0.279856	7	2.46069e+07	27.9856	206
CPS1	1.84308	7	2.44775e+07	184.308	207
IGKV3D-7	0.178661	7	2.44341e+07	17.8661	208
C1QC	0.252053	7	2.42674e+07	25.2053	209
P4HB	1.39294	7	2.40173e+07	139.294	210
SUCLG2	0.58984	7	2.38473e+07	58.984	211
MED30	0.241941	7	2.38374e+07	24.1941	212
CBR3	1.36063	6	2.3557e+07	136.063	213
RPL10	1.65569	4	2.32557e+07	165.569	214
RPL10L	1.65569	4	2.32557e+07	165.569	215
SERPINA4	0.165342	7	2.31984e+07	16.5342	216
GGCT	1.71633	4	2.30216e+07	171.633	217
BAG5	0.21668	7	2.29339e+07	21.668	218
KRT28	1.30749	7	2.26439e+07	130.749	219
STXBP5	0.249698	7	2.26187e+07	24.9698	220
TAGLN	0.0837976	7	2.25322e+07	8.37976	221
IGHV3-15	0.350588	7	2.24153e+07	35.0588	222
C1QA	0.325168	7	2.2394e+07	32.5168	223
APOM	0.36352	7	2.20193e+07	36.352	224
UCHL3	1.72541	4	2.20071e+07	172.541	225
APOD	0.124517	7	2.18951e+07	12.4517	226
U2AF2	0.927409	4	2.18294e+07	92.7409	227
SNX27	0.805761	7	2.18012e+07	80.5761	228
ADAM17	0.858885	4	2.17865e+07	85.8885	229
F13A1	0.574136	7	2.17825e+07	57.4136	230
UGGT2	0.201125	7	2.17129e+07	20.1125	231
IGLV1-47	0.214841	7	2.14932e+07	21.4841	232
TIMM44	0.138522	7	2.12924e+07	13.8522	233
CD5L	0.182246	7	2.11933e+07	18.2246	234
MAP1A	0.153977	7	2.11345e+07	15.3977	235
MSL1	0.280459	7	2.11067e+07	28.0459	236
SPTA1	1.2758	7	2.10984e+07	127.58	237
CA1	1.72526	7	2.10833e+07	172.526	238
C2	0.180267	7	2.1024e+07	18.0267	239
SELENBP1	0.972957	7	20996864	97.2957	240
SYNE1	0.307152	7	2.09963e+07	30.7152	241
NIBAN1	0.930218	5	2.09776e+07	93.0218	242
F10	0.3258	7	2.09768e+07	32.58	243
APOL1	0.219171	7	2.06634e+07	21.9171	244
CAPN5	0.646495	5	2.03738e+07	64.6495	245
IGHV3-72	0.399664	7	2.03202e+07	39.9664	246
NCL	0.73821	7	2.03037e+07	73.821	247
PLTP	1.17796	7	2.00195e+07	117.796	248
GALE	1.74432	7	1.9729e+07	174.432	249
KRT20	0.181299	7	19380168	18.1299	250
NID2	2.06676	6	1.93255e+07	206.676	251
ENO1	0.64743	7	1.92919e+07	64.743	252
PRKDC	0.723451	7	1.92564e+07	72.3451	253
BUB1B	0.376773	7	1.89812e+07	37.6773	254
PGLYRP2	0.154867	7	1.89523e+07	15.4867	255
FCN3	0.216431	7	1.88637e+07	21.6431	256
IGHV5-51	0.126232	7	1.88499e+07	12.6232	257
KRT2	0.394528	7	1.86424e+07	39.4528	258
ENPEP	0.887764	7	1.86379e+07	88.7764	259
SIRPB1	0.230044	7	1.85972e+07	23.0044	260
CD109	0.662097	7	1.84439e+07	66.2097	261
TTN	1.66405	4	1.83417e+07	166.405	262
CDC37	0.334965	7	1.8082e+07	33.4965	263
CELA3A	1.61398	7	1.80241e+07	161.398	264
C8G	1.20124	7	1.78982e+07	120.124	265
RBP4	0.0771097	7	1.78823e+07	7.71097	266
RDX	0.717748	7	1.78651e+07	71.7748	267
ACAN	1.09616	7	1.78424e+07	109.616	268
COG7	0.768491	7	1.77472e+07	76.8491	269
TRA2B	0.857879	4	1.74808e+07	85.7879	270
IMMT	0.730636	7	1.74783e+07	73.0636	271
SPTAN1	1.05143	7	1.72703e+07	105.143	272
ENO2	0.266658	7	1.72007e+07	26.6658	273
PARK7	1.04815	7	1.70556e+07	104.815	274
KRT8	0.329908	7	1.70032e+07	32.9908	275
EEF1D	0.469654	7	1.69305e+07	46.9654	276
ENO3	0.270656	7	1.69085e+07	27.0656	277
GPX3	0.310454	7	1.68664e+07	31.0454	278
WDR91	0.966765	7	1.68523e+07	96.6765	279
CDC42BPA	0.273095	7	1.68234e+07	27.3095	280
DSP	0.620383	7	1.68218e+07	62.0383	281
INTS4	0.24192	7	1.65504e+07	24.192	282
NAA15	0.300526	6	1.65357e+07	30.0526	283
SLC35B2	0.301836	7	1.65138e+07	30.1836	284
HERC4	1.18835	6	1.64799e+07	118.835	285
CFI	0.220382	7	1.62801e+07	22.0382	286
EPHX1	1.0716	7	1.6132e+07	107.16	287
SERPINA7	0.219595	7	1.61133e+07	21.9595	288
SHMT2	1.11984	5	1.59978e+07	111.984	289
TNXB	0.657823	7	1.59804e+07	65.7823	290
UBE2K	0.813505	4	1.59142e+07	81.3505	291
FLNB	1.39423	7	1.58187e+07	139.423	292
RPL15	0.934767	4	1.5813e+07	93.4767	293
MAOB	1.66459	4	1.58088e+07	166.459	294
PI16	1.3212	7	1.57762e+07	132.12	295
LPA	1.21566	7	1.57097e+07	121.566	296
AHNAK	1.01492	7	1.56466e+07	101.492	297
FBLN1	0.532495	7	1.54801e+07	53.2495	298
CPN2	0.151063	7	1.5462e+07	15.1063	299
SLC27A1	1.86801	5	1.54384e+07	186.801	300
MSN	0.697898	7	1.50887e+07	69.7898	301
MDH2	1.93755	6	1.50884e+07	193.755	302
YWHAE	0.575971	7	1.50281e+07	57.5971	303
SNTB2	1.59759	4	1.49763e+07	159.759	304
DRG1	0.329333	4	1.49528e+07	32.9333	305
C1RL	1.39354	7	1.48574e+07	139.354	306
PFKM	0.352809	6	1.48543e+07	35.2809	307
PTPRF	1.07055	7	1.4429e+07	107.055	308
TTC37	0.249817	7	1.40571e+07	24.9817	309
TGFBI	0.236669	7	1.39465e+07	23.6669	310
IGHV3-73	0.245557	7	1.39024e+07	24.5557	311
PLCG2	0.982096	5	1.38236e+07	98.2096	312
IGHV3-74	0.31776	7	1.37663e+07	31.776	313
PECAM1	2.17825	6	1.37506e+07	217.825	314
DYNLL2	0.354715	6	1.37465e+07	35.4715	315
LAMA5	1.18349	7	1.36305e+07	118.349	316
LDHB	0.510046	7	1.36069e+07	51.0046	317
CTSB	0.372035	7	1.35751e+07	37.2035	318
IGFBP2	0.739868	6	1.33579e+07	73.9868	319
YES1	0.852994	4	1.3344e+07	85.2994	320
CD74	0.664049	4	1.33314e+07	66.4049	321
MCM2	1.13643	7	1.3307e+07	113.643	322
TMEM198	0.0901249	7	1.33011e+07	9.01249	323
CFHR1	0.15388	7	1.32331e+07	15.388	324
TUBB4B	0.900716	7	1.30415e+07	90.0716	325
CA2	1.07947	7	1.30106e+07	107.947	326
TKT	0.382705	7	1.2989e+07	38.2705	327
PSME1	0.329871	7	1.29757e+07	32.9871	328
PPL	1.69677	4	1.29752e+07	169.677	329
F11	0.583722	7	1.2797e+07	58.3722	330
ITLN1	0.602737	6	1.27172e+07	60.2737	331
ITLN2	0.602737	6	1.27172e+07	60.2737	332
IGKV3D-15	0.217885	7	1.26614e+07	21.7885	333
RNH1	1.67096	4	1.26301e+07	167.096	334
NLN	0.875076	4	1.2618e+07	87.5076	335
MYH9	0.44391	7	1.25789e+07	44.391	336
CCT5	0.695621	5	1.2482e+07	69.5621	337
PEBP1	0.3643	6	1.24759e+07	36.43	338
RIPOR1	0.0486845	5	1.24057e+07	4.86845	339
SUPT16H	0.796764	7	1.2331e+07	79.6764	340
HABP2	0.403924	7	1.2305e+07	40.3924	341
IGKV2-29	0.0533485	7	1.219e+07	5.33485	342
IGKV2D-29	0.0536329	7	1.21865e+07	5.36329	343
HSPA8	1.95065	7	11950333	195.065	344
GPLD1	0.249523	7	1.18108e+07	24.9523	345
VARS1	1.36993	7	1.17232e+07	136.993	346
PIP	0.25534	4	1.16713e+07	25.534	347
ADSL	0.710275	7	1.16696e+07	71.0275	348
PRSS1	0.176426	7	1.16693e+07	17.6426	349
FABP1	1.16702	5	1.16447e+07	116.702	350
IGKV2D-26	0.0757618	7	1.16379e+07	7.57618	351
ANXA2	0.170282	7	1.15787e+07	17.0282	352
TUBB4A	0.940786	7	1.15677e+07	94.0786	353
HDGF	1.35099	7	1.15236e+07	135.099	354
ALDOA	0.228944	7	1.14615e+07	22.8944	355
CS	0.204158	7	1.13772e+07	20.4158	356
S100A8	0.618853	7	1.13319e+07	61.8853	357
SERPINA5	0.20225	7	1.12517e+07	20.225	358
BCHE	0.447794	7	1.12147e+07	44.7794	359
EEF2	0.622401	7	1.11904e+07	62.2401	360
ZNF185	0.215022	5	1.11141e+07	21.5022	361
ELOC	0.570719	7	1.11127e+07	57.0719	362
MVP	1.7236	7	1.10903e+07	172.36	363
VPS13C	1.09304	7	1.1086e+07	109.304	364
SYTL2	0.207009	4	1.10652e+07	20.7009	365
USP5	1.08952	7	1.10335e+07	108.952	366
CDC5L	0.463433	7	1.10129e+07	46.3433	367
SERPINB10	0.52011	7	1.09305e+07	52.011	368
NOL9	0.156075	7	1.09063e+07	15.6075	369
SYTL1	0.170436	7	1.0868e+07	17.0436	370
SLC4A2	0.301991	5	1.07527e+07	30.1991	371
SERPINB12	0.82433	7	1.06999e+07	82.433	372
SFXN1	0.364657	4	1.06863e+07	36.4657	373
KRT18	0.511677	7	1.06313e+07	51.1677	374
LMNB1	1.31562	6	1.06156e+07	131.562	375
NDUFAF3	0.363231	7	1.06129e+07	36.3231	376
SMARCA4	0.0900508	7	1.06007e+07	9.00508	377
MRPL2	0.273677	6	1.05834e+07	27.3677	378
SMARCA2	0.0909332	7	10582632	9.09332	379
EIF4A2	0.701273	7	1.05698e+07	70.1273	380
DYSF	0.636473	7	1.05615e+07	63.6473	381
PSMD3	1.74791	7	1.05586e+07	174.791	382
ACSL4	0.390357	4	1.05365e+07	39.0357	383
RTN4	0.811773	7	1.05253e+07	81.1773	384
HES7	0.338993	7	1.05049e+07	33.8993	385
IGHV3-49	0.146218	7	1.04965e+07	14.6218	386
IGHD	0.0861207	7	1.04939e+07	8.61207	387
GGT1	0.143029	7	1.03858e+07	14.3029	388
GGT2	0.143029	7	1.03858e+07	14.3029	389
GGT3P	0.143029	7	1.03858e+07	14.3029	390
SELENOP	0.329098	7	1.0274e+07	32.9098	391
IGKV2-24	0.22515	7	1.02349e+07	22.515	392
IGKV2D-24	0.22515	7	1.02349e+07	22.515	393
HMBS	0.956154	5	1.02042e+07	95.6154	394
LRBA	0.895148	4	1.01888e+07	89.5148	395
GATM	0.454258	7	1.01798e+07	45.4258	396
TUBB	1.2913	7	1.01615e+07	129.13	397
IGKV2-28	0.413786	7	1.01559e+07	41.3786	398
IGKV2D-28	0.413786	7	1.01559e+07	41.3786	399
DDX58	0.645357	5	1.01237e+07	64.5357	400
HNRNPUL2	0.848452	6	1.01057e+07	84.8452	401
APOC4	0.836724	7	1.0012e+07	83.6724	402
JUP	0.900443	7	9.99295e+06	90.0443	403
EXOC1	1.08588	5	9.96255e+06	108.588	404
ANPEP	0.461135	7	9.95416e+06	46.1135	405
IRGQ	0.296724	7	9.94899e+06	29.6724	406
ATP5F1B	0.780889	7	9.94793e+06	78.0889	407
SERPINB1	2.35659	7	9.92851e+06	235.659	408
MRPS31	0.858485	4	9.89876e+06	85.8485	409
UFD1	0.266063	4	9.88632e+06	26.6063	410
SERPINB6	0.987536	7	9.87724e+06	98.7536	411
IGHV5-10-1	0.375883	7	9.83204e+06	37.5883	412
CFHR3	1.09082	7	9.82755e+06	109.082	413
PRSS2	0.222015	7	9.7932e+06	22.2015	414
PRSS3P2	0.222015	7	9.7932e+06	22.2015	415
PPP2R1A	1.06151	5	9.78764e+06	106.151	416
SERPINH1	2.01102	6	9.74727e+06	201.102	417
IGKV2-40	0.429644	7	9.71434e+06	42.9644	418
IGKV2D-40	0.429644	7	9.71434e+06	42.9644	419
SMPD4	0.539974	4	9.6197e+06	53.9974	420
HSPA1L	2.46907	7	9.61942e+06	246.907	421
TUBB3	0.749235	7	9.54706e+06	74.9235	422
CAP1	1.6399	7	9.48761e+06	163.99	423
POLR2A	0.166366	5	9.4758e+06	16.6366	424
CTNNB1	1.09147	5	9.41564e+06	109.147	425
CNN2	0.936166	7	9.40398e+06	93.6166	426
TNC	0.840132	7	9.36368e+06	84.0132	427
ADH1B	0.222023	4	9.36124e+06	22.2023	428
GLIPR2	0.86978	7	9.35245e+06	86.978	429
FREM2	1.80613	5	9.19671e+06	180.613	430
ARFGEF3	1.22737	6	9.17494e+06	122.737	431
SCRIB	0.224743	7	9.15293e+06	22.4743	432
IGFBP6	0.724533	7	9.14706e+06	72.4533	433
HNRNPM	0.557429	7	9.1301e+06	55.7429	434
CAPNS1	1.31069	6	9.11333e+06	131.069	435
ERAP1	0.371529	7	9.07403e+06	37.1529	436
PAM	1.43169	5	9.05565e+06	143.169	437
METTL18	0.307746	7	9.04009e+06	30.7746	438
POF1B	2.3617	7	9.01404e+06	236.17	439
CNDP1	0.170835	7	9.01247e+06	17.0835	440
RRBP1	0.258565	6	8.92926e+06	25.8565	441
MTAP	0.616194	7	8.91739e+06	61.6194	442
F5	0.955763	7	8.8736e+06	95.5763	443
GK	0.625594	5	8.77097e+06	62.5594	444
GK3P	0.625594	5	8.77097e+06	62.5594	445
FAT2	0.298128	7	8.71303e+06	29.8128	446
TNXA	1.2732	7	8.6711e+06	127.32	447
HEBP2	0.26222	4	8.64879e+06	26.222	448
CSN2	1.132	5	8.63439e+06	113.2	449
FUBP1	1.60649	7	8.54954e+06	160.649	450
PLEKHA7	1.21192	5	8.53822e+06	121.192	451
ECM1	0.199252	7	8436925	19.9252	452
FASN	0.6605	7	8.42981e+06	66.05	453
IL6ST	0.10143	7	8.39303e+06	10.143	454
ACTB	0.135159	7	8.38073e+06	13.5159	455
ACTG1	0.135159	7	8.38073e+06	13.5159	456
ABCF3	1.37373	4	8.37451e+06	137.373	457
SF3B1	0.76211	7	8.32059e+06	76.211	458
MMP8	2.43476	7	8.317e+06	243.476	459
MYO1B	0.254346	7	8.31133e+06	25.4346	460
MACROH2A1	0.935692	5	8.17887e+06	93.5692	461
CNN3	0.585818	6	8.08221e+06	58.5818	462
CTSG	0.486635	7	8.06919e+06	48.6635	463
GAPDH	1.26561	7	8.04133e+06	126.561	464
MYO5A	1.49638	4	8.03957e+06	149.638	465
MAP2K7	1.06706	4	7.87079e+06	106.706	466
ADH1A	0.111434	4	7.87038e+06	11.1434	467
ADH1C	0.111434	4	7.87038e+06	11.1434	468
MYO1A	0.416037	7	7.82364e+06	41.6037	469
RTCB	1.27808	7	7.80341e+06	127.808	470
WDR7	0.600146	7	7.79867e+06	60.0146	471
NUCB2	0.57892	7	7.77221e+06	57.892	472
PPP1R9B	0.123585	7	7.76254e+06	12.3585	473
CADM4	0.63988	4	7.75075e+06	63.988	474
HSPA5	0.517872	7	7.74642e+06	51.7872	475
COG3	0.577971	6	7.64378e+06	57.7971	476
PRDX2	0.410973	7	7.63048e+06	41.0973	477
CD44	0.975796	7	7.61309e+06	97.5796	478
C1R	0.546717	7	7.60007e+06	54.6717	479
TIMD4	0.531177	5	7.5864e+06	53.1177	480
FLNC	0.877794	7	7.53269e+06	87.7794	481
GSTO1	1.01291	7	7.51535e+06	101.291	482
TUBB2A	1.77447	7	7.50498e+06	177.447	483
TUBB2B	1.77811	7	7.48492e+06	177.811	484
FERMT3	0.791711	7	7.46098e+06	79.1711	485
SUOX	1.12374	5	7.44172e+06	112.374	486
H3-3A	1.5777	7	7.41815e+06	157.77	487
IGHV4-28	0.324789	7	7.34803e+06	32.4789	488
WARS1	1.01596	7	7.34622e+06	101.596	489
SMPDL3A	1.675	4	7.32526e+06	167.5	490
IGLV7-43	0.451458	7	7.29674e+06	45.1458	491
IGLV7-46	0.451458	7	7.29674e+06	45.1458	492
NFS1	0.27468	7	7.29272e+06	27.468	493
BSG	0.7941	6	7.15132e+06	79.41	494
OXCT1	1.746	7	7.13619e+06	174.6	495
HSPH1	0.307059	7	7.03488e+06	30.7059	496
IGHV3-30	0.16092	7	7.03432e+06	16.092	497
IGHV3-30-3	0.16092	7	7.03432e+06	16.092	498
IGHV3-30-5	0.16092	7	7.03432e+06	16.092	499
SLC4A1	0.590261	7	7.03359e+06	59.0261	500
SNRPD1	0.56458	6	6.99847e+06	56.458	501
CSF1R	2.54171	7	6.99838e+06	254.171	502
VPS4A	0.0754682	5	6.99013e+06	7.54682	503
IGHV3-33	0.166847	7	6.97472e+06	16.6847	504
TBC1D13	0.533409	4	6.9341e+06	53.3409	505
TUFM	2.13717	6	6.93312e+06	213.717	506
HSP90AB1	0.447817	7	6.87047e+06	44.7817	507
NDUFA10	0.14379	7	6.86586e+06	14.379	508
MARK2	1.10159	7	6.83768e+06	110.159	509
LPCAT4	0.345665	6	6.74893e+06	34.5665	510
PAICS	1.00253	7	6.72449e+06	100.253	511
PON2	0.239713	5	6.71927e+06	23.9713	512
IGLV1-51	0.185994	7	6.71735e+06	18.5994	513
IGKV2D-30	0.133795	7	6.70118e+06	13.3795	514
CALHM5	0.312924	7	6.70097e+06	31.2924	515
MRPL23	0.567947	7	6.62573e+06	56.7947	516
PFKL	0.945061	7	6.62316e+06	94.5061	517
PITPNB	1.02461	4	6.61265e+06	102.461	518
OLFM4	0.874605	7	6.57664e+06	87.4605	519
ACTA1	0.114695	7	6.57125e+06	11.4695	520
AHCTF1	0.281796	4	6.5521e+06	28.1796	521
RNPEP	0.491958	7	6.50809e+06	49.1958	522
NCAM1	0.698487	7	6.44251e+06	69.8487	523
CAT	0.38238	7	6.42471e+06	38.238	524
THUMPD1	0.289889	7	6.3809e+06	28.9889	525
MFN1	0.113882	4	6.37798e+06	11.3882	526
CSE1L	1.25227	7	6.37114e+06	125.227	527
LIMCH1	0.535901	7	6.36472e+06	53.5901	528
RPS27A	1.36658	7	6.21067e+06	136.658	529
UBA52	1.36658	7	6.21067e+06	136.658	530
UBB	1.36658	7	6.21067e+06	136.658	531
UBC	1.36658	7	6.21067e+06	136.658	532
TMEM126A	1.69934	7	6.17552e+06	169.934	533
CALR	0.891795	7	6.14417e+06	89.1795	534
SPTB	1.67867	7	6.11095e+06	167.867	535
PSME2	0.940643	6	6.106e+06	94.0643	536
OGFOD3	0.632671	4	6.09662e+06	63.2671	537
HEXB	1.5215	7	6.06774e+06	152.15	538
AGR2	1.77726	7	6.02703e+06	177.726	539
SRPK1	1.95602	5	6.01369e+06	195.602	540
HDLBP	1.08581	7	6.01014e+06	108.581	541
SUPT5H	1.22468	7	6.00773e+06	122.468	542
IGKV1-33	0.392665	7	6.00571e+06	39.2665	543
IGKV1D-33	0.392665	7	6.00571e+06	39.2665	544
BANF1	0.861813	5	5.99014e+06	86.1813	545
IGLV3-1	0.973261	4	5.98104e+06	97.3261	546
CNOT3	0.47295	4	5.96445e+06	47.295	547
RNASE3	0.549451	6	5.96037e+06	54.9451	548
TRAM1	0.283805	4	5.94235e+06	28.3805	549
NAP1L1	0.752386	5	5.91967e+06	75.2386	550
TUBB6	0.668885	7	5.91705e+06	66.8885	551
STT3A	2.11459	7	5.89593e+06	211.459	552
ACTA2	0.171514	7	5.89341e+06	17.1514	553
NUMA1	0.673883	7	5.88085e+06	67.3883	554
KRT15	0.248738	7	5.8783e+06	24.8738	555
ACTG2	0.16535	7	5.87414e+06	16.535	556
ACTC1	0.134163	7	5.87065e+06	13.4163	557
LCAT	0.750437	7	5.85967e+06	75.0437	558
ATXN10	0.167603	7	5.82232e+06	16.7603	559
OAF	1.62208	4	5.81878e+06	162.208	560
HACD3	0.637713	6	5.80969e+06	63.7713	561
ADPRS	0.762899	6	5.77545e+06	76.2899	562
MRPL49	0.21453	5	5.76104e+06	21.453	563
CPSF6	0.44544	7	5.75021e+06	44.544	564
TRIM28	1.37162	5	5.70874e+06	137.162	565
OIT3	0.130564	7	5.70095e+06	13.0564	566
ECI1	1.6612	4	5.68125e+06	166.12	567
COL6A1	0.821928	7	5.67137e+06	82.1928	568
CPN1	0.21715	7	5.63349e+06	21.715	569
SERPINA2	0.610574	7	5.60206e+06	61.0574	570
ACTBL2	0.13294	7	5.5913e+06	13.294	571
EPHB1	0.866749	4	5.58775e+06	86.6749	572
EPHB2	0.866749	4	5.58775e+06	86.6749	573
SNRPB	0.425604	7	5.54347e+06	42.5604	574
SNRPN	0.425604	7	5.54347e+06	42.5604	575
EXOC3	0.147386	7	5.53034e+06	14.7386	576
DOCK7	0.929483	7	5.52861e+06	92.9483	577
IGHV3-23	0.139572	7	5.47739e+06	13.9572	578
PROC	0.8355	7	5.39643e+06	83.55	579
MRPL15	0.546794	7	5.39121e+06	54.6794	580
HARS1	1.67961	4	5.37681e+06	167.961	581
TRIP12	1.10137	7	5.36294e+06	110.137	582
RPLP0	1.09525	7	5.35959e+06	109.525	583
THBS1	0.617563	7	5.35248e+06	61.7563	584
RPLP0P6	1.10153	7	5.34227e+06	110.153	585
ATP5F1A	0.579845	7	5.32878e+06	57.9845	586
HDHD3	0.615651	7	5.29979e+06	61.5651	587
SERPINA10	0.39177	7	5.29497e+06	39.177	588
ATP5PO	0.762784	4	5.29072e+06	76.2784	589
ACTN1	1.58815	7	5.2815e+06	158.815	590
KIF5B	0.978721	5	5.2696e+06	97.8721	591
EHD1	0.252333	7	5.26442e+06	25.2333	592
EPPK1	0.234734	7	5.23153e+06	23.4734	593
IQGAP1	1.24834	7	5.23088e+06	124.834	594
IGLV2-11	0.265282	7	5.22375e+06	26.5282	595
IGLV3-21	0.141743	7	5.18595e+06	14.1743	596
CFHR4	1.94036	7	5.18013e+06	194.036	597
SGCE	0.471353	4	5.16921e+06	47.1353	598
SERPINA11	1.33988	5	5.16776e+06	133.988	599
RTN4RL2	0.558703	6	5.14257e+06	55.8703	600
LRP1	1.13525	7	5.13915e+06	113.525	601
BLMH	0.772815	7	5.13696e+06	77.2815	602
SCARB2	0.258964	7	5.13193e+06	25.8964	603
IGHV3-53	0.129326	7	5.13191e+06	12.9326	604
IGHV3-66	0.129326	7	5.13191e+06	12.9326	605
CDH2	0.499263	7	5.12179e+06	49.9263	606
IGLV3-9	0.153846	7	5.11515e+06	15.3846	607
PRDX6	0.83355	7	5.10563e+06	83.355	608
PAPSS1	0.275087	7	5.10451e+06	27.5087	609
UGDH	0.0893542	4	5.08398e+06	8.93542	610
VIRMA	1.78298	5	5.08397e+06	178.298	611
DCTN1	0.821025	7	5.03637e+06	82.1025	612
AGO3	0.848855	4	5.02905e+06	84.8855	613
ACE2	0.664837	7	5.02828e+06	66.4837	614
USP7	1.13627	7	5.00123e+06	113.627	615
CHI3L1	0.562594	7	4.99688e+06	56.2594	616
AGO2	0.86806	4	4.99158e+06	86.806	617
PTPRS	1.51091	7	4.97066e+06	151.091	618
POLR2B	1.27842	7	4.96752e+06	127.842	619
NONO	0.830049	7	4.96697e+06	83.0049	620
TPP1	1.34507	7	4.92799e+06	134.507	621
HMGB1	0.758811	7	4.92782e+06	75.8811	622
G6PD	1.28068	6	4.90514e+06	128.068	623
TFRC	1.39961	7	4.87594e+06	139.961	624
IGHV2-70D	0.245545	7	4.87034e+06	24.5545	625
ATP6V1A	0.33239	4	4.86934e+06	33.239	626
F12	0.275975	7	4.86002e+06	27.5975	627
CUL2	0.233176	5	4.84985e+06	23.3176	628
RACK1	0.586093	7	4.83223e+06	58.6093	629
RELA	0.274083	6	4.79611e+06	27.4083	630
SAMHD1	0.773844	7	4.78898e+06	77.3844	631
MUC6	0.717897	5	4.77268e+06	71.7897	632
PROZ	1.28122	7	4.76349e+06	128.122	633
VCL	0.716805	7	4.76144e+06	71.6805	634
HGFAC	0.558412	7	4.75808e+06	55.8412	635
CD163	0.502287	7	4.75328e+06	50.2287	636
LGALS4	0.515748	7	4.75295e+06	51.5748	637
DYNC1H1	0.740384	7	4.74912e+06	74.0384	638
MAT2B	0.37483	7	4.73977e+06	37.483	639
XPO1	0.718638	5	4.72296e+06	71.8638	640
GAS6	0.493215	7	4.72171e+06	49.3215	641
NAXE	0.922476	7	4.71824e+06	92.2476	642
TUBB1	1.04385	7	4.71584e+06	104.385	643
ACOX1	1.34933	6	4.70382e+06	134.933	644
SND1	0.534956	5	4.67924e+06	53.4956	645
CTSL	0.186667	6	4.65734e+06	18.6667	646
SUMF2	0.2973	5	4.64625e+06	29.73	647
ITGA2	0.534049	7	4.64259e+06	53.4049	648
PUF60	0.84672	5	4.63301e+06	84.672	649
HEPACAM	0.676337	4	4.63252e+06	67.6337	650
HIBADH	0.427613	7	4.6121e+06	42.7613	651
CUL4A	0.610009	5	4.59594e+06	61.0009	652
COL1A1	0.880125	7	4.58338e+06	88.0125	653
GDI1	0.518317	7	4.57945e+06	51.8317	654
ANXA6	0.631979	7	4.57612e+06	63.1979	655
B4GAT1	0.991743	5	4.56286e+06	99.1743	656
L2HGDH	0.556023	7	4.56109e+06	55.6023	657
EXOG	0.224558	6	4.54382e+06	22.4558	658
PNKP	0.71157	6	4.50964e+06	71.157	659
HK2	0.243873	4	4.49847e+06	24.3873	660
NUP98	1.04164	7	4.49468e+06	104.164	661
COL6A2	0.940386	7	4.48607e+06	94.0386	662
ATL3	1.33009	6	4.4724e+06	133.009	663
ALDH1A3	0.249898	6	4.45238e+06	24.9898	664
PSMD10	1.33934	4	4.45212e+06	133.934	665
LONP1	1.39896	5	4.4425e+06	139.896	666
EPRS1	2.20724	7	4.41223e+06	220.724	667
CLEC3B	0.155569	7	4.41181e+06	15.5569	668
CSTF2	0.60751	5	4.39588e+06	60.751	669
MPO	1.08164	7	4.38758e+06	108.164	670
IGHV1-46	0.221231	7	4.38425e+06	22.1231	671
HMGB2	0.783252	7	4.36051e+06	78.3252	672
PDIA3	0.835623	7	4.35097e+06	83.5623	673
NSUN2	0.520565	6	4.34191e+06	52.0565	674
PSMB4	1.42151	7	4.33607e+06	142.151	675
IGHV2-26	0.855756	7	4.32679e+06	85.5756	676
IGHV3-64D	0.170324	7	4.30323e+06	17.0324	677
CDH1	1.61433	7	4.2949e+06	161.433	678
BCAP31	0.865493	7	4.27869e+06	86.5493	679
PLXDC2	1.11942	7	4.27863e+06	111.942	680
CSTF2T	0.603157	5	4.27682e+06	60.3157	681
IGLV8-61	0.184223	7	4.27347e+06	18.4223	682
CANX	1.93663	7	4.26865e+06	193.663	683
GLUD1	1.89149	5	4.26271e+06	189.149	684
MTREX	0.399989	7	4.26039e+06	39.9989	685
FXR1	0.64434	4	4.25512e+06	64.434	686
GFM1	0.0505257	5	4.23528e+06	5.05257	687
GMPS	0.171629	7	4.22231e+06	17.1629	688
ACTR3	2.24441	7	4.21532e+06	224.441	689
AKR1C1	0.114221	5	4.20992e+06	11.4221	690
PFN1	0.509511	7	4.20795e+06	50.9511	691
HSPD1	1.14967	7	4.16526e+06	114.967	692
GABBR1	0.0896337	4	4.16116e+06	8.96337	693
IGBP1	0.749228	4	4.15618e+06	74.9228	694
CORO1C	1.55368	4	4.14328e+06	155.368	695
UBA1	0.703392	7	4.10467e+06	70.3392	696
RPN1	0.684239	7	4.10016e+06	68.4239	697
AP2A1	0.681189	7	4.09885e+06	68.1189	698
SEC31A	1.50955	5	4.07292e+06	150.955	699
P3H3	0.276881	4	4.06189e+06	27.6881	700
PSMC3	0.197489	5	4.0532e+06	19.7489	701
NNT	1.03833	7	4.04578e+06	103.833	702
NPC2	0.225918	5	4.04409e+06	22.5918	703
AKR1C4	0.133273	5	4.03211e+06	13.3273	704
GANAB	1.52318	7	4.00874e+06	152.318	705
MYO1C	0.661416	7	4.00037e+06	66.1416	706
CCNK	0.315267	7	3.993e+06	31.5267	707
IGLV2-8	0.289148	7	3.98024e+06	28.9148	708
COL14A1	0.666808	7	3.97935e+06	66.6808	709
CLSTN1	1.32461	7	3.94378e+06	132.461	710
MSH2	0.127202	7	3.93804e+06	12.7202	711
ELP1	0.125241	6	3.93068e+06	12.5241	712
ITGB2	0.366345	7	3.92291e+06	36.6345	713
IGLV3-10	1.16258	7	3.91961e+06	116.258	714
NSF	0.761186	7	3.91952e+06	76.1186	715
ACSL5	0.334606	4	3.91571e+06	33.4606	716
GSS	1.28365	6	3.91007e+06	128.365	717
ALDH1A1	1.47809	7	3.90905e+06	147.809	718
ARL6IP5	0.973153	7	3.85736e+06	97.3153	719
LMNB2	0.657416	6	3.85179e+06	65.7416	720
CLTC	0.903526	7	3.84758e+06	90.3526	721
KDSR	1.01526	4	3.8206e+06	101.526	722
FCGR3A	0.470123	7	3.81786e+06	47.0123	723
IGHV1-2	0.0838285	7	3.77423e+06	8.38285	724
EMILIN1	0.91715	7	3.76935e+06	91.715	725
LAMB2	0.471015	7	3.76491e+06	47.1015	726
GALK1	2.31352	7	3.7535e+06	231.352	727
MPP3	0.294753	6	3.73433e+06	29.4753	728
VPS25	0.366878	4	3.70951e+06	36.6878	729
IGHV3-38	0.215114	7	3.67034e+06	21.5114	730
PSMB7	0.210127	6	3.66914e+06	21.0127	731
KRT73	0.421069	7	3.63717e+06	42.1069	732
UNC45A	0.682369	4	3.62206e+06	68.2369	733
RPS4X	0.401129	7	3.62008e+06	40.1129	734
CKAP5	0.572661	6	3.6159e+06	57.2661	735
AP2M1	1.16116	5	3.61029e+06	116.116	736
HDGFL3	0.241389	4	3.60943e+06	24.1389	737
INPP5D	1.30024	4	3.60238e+06	130.024	738
CSPG4	0.415382	7	3.60218e+06	41.5382	739
IGLV3-25	0.292746	7	3.596e+06	29.2746	740
FCGR3B	0.567555	7	3.59502e+06	56.7555	741
ALPL	0.645488	5	3.59302e+06	64.5488	742
IGHV3-48	0.475421	7	3.59161e+06	47.5421	743
SLC3A2	1.0852	5	3.58318e+06	108.52	744
ACAA2	1.26679	7	3.57285e+06	126.679	745
LRRC47	0.193339	7	3.56768e+06	19.3339	746
DOCK1	0.361119	5	3.55454e+06	36.1119	747
SLC25A3	1.66334	4	3.50359e+06	166.334	748
MACF1	0.426421	7	3.50295e+06	42.6421	749
IGKV1-37	0.271959	7	3.49489e+06	27.1959	750
IGKV1D-37	0.271959	7	3.49489e+06	27.1959	751
COG2	0.897539	6	3.49345e+06	89.7539	752
ADIPOQ	0.378414	7	3.4926e+06	37.8414	753
ARSD	0.440913	7	3.49105e+06	44.0913	754
PIN1	0.994784	6	3.47321e+06	99.4784	755
DDB1	0.957612	7	3.46728e+06	95.7612	756
NCF1	1.55702	4	3.46466e+06	155.702	757
NCF1B	1.55702	4	3.46466e+06	155.702	758
NCF1C	1.55702	4	3.46466e+06	155.702	759
PRDX1	0.988602	7	3.45472e+06	98.8602	760
SEPHS2	0.285062	4	3.45141e+06	28.5062	761
HPCAL1	0.594778	4	3.44375e+06	59.4778	762
CUL4B	0.771392	7	3.43594e+06	77.1392	763
VWA1	1.91777	6	3.4207e+06	191.777	764
LRPPRC	0.660884	7	3.41886e+06	66.0884	765
NFKB1	0.897344	6	3.41561e+06	89.7344	766
SHBG	0.308482	7	3.41151e+06	30.8482	767
SERPINB13	0.105228	4	3.40543e+06	10.5228	768
DPEP1	1.34679	4	3.3975e+06	134.679	769
ANKRD17	1.17692	5	3.39638e+06	117.692	770
HMGCS2	0.344701	7	3.38017e+06	34.4701	771
SPARCL1	1.10385	5	3.37705e+06	110.385	772
IGKV1-8	0.237628	7	3.35647e+06	23.7628	773
PSMA6	1.14819	4	3.35189e+06	114.819	774
IGLV3-16	0.396753	7	3.34913e+06	39.6753	775
LCN2	1.20196	6	3.34493e+06	120.196	776
EEF1A2	0.492568	6	3.32201e+06	49.2568	777
PSMC1	1.28872	5	3.31691e+06	128.872	778
THOC5	0.531765	5	3.31142e+06	53.1765	779
IGHV6-1	0.227296	7	3.29917e+06	22.7296	780
PTPN12	1.22659	7	3.29659e+06	122.659	781
TUBB8B	1.43302	7	3.29589e+06	143.302	782
ABCE1	0.309185	5	3.29138e+06	30.9185	783
PLIN3	0.927627	6	3.28996e+06	92.7627	784
HDAC6	0.649298	5	3.27625e+06	64.9298	785
BCS1L	0.295841	7	3.27316e+06	29.5841	786
IGLV3-27	0.42214	7	3.26724e+06	42.214	787
EEF1A1	0.501661	7	3.26346e+06	50.1661	788
EEF1A1P5	0.501661	7	3.26346e+06	50.1661	789
POGZ	0.646724	4	3.25433e+06	64.6724	790
GOLIM4	0.545163	4	3.25245e+06	54.5163	791
CRTAC1	0.931982	7	3.25153e+06	93.1982	792
PDP1	1.07909	5	3.25149e+06	107.909	793
OSBP	0.64794	7	3.23305e+06	64.794	794
NID1	0.644612	7	3.22308e+06	64.4612	795
RO60	1.13389	7	3.2182e+06	113.389	796
RAB11B	0.41292	7	3.20696e+06	41.292	797
YWHAG	0.492439	7	3.20502e+06	49.2439	798
PNP	1.02244	7	3.19834e+06	102.244	799
KRT19	0.601327	7	3.1982e+06	60.1327	800
PRCP	1.3693	5	3.1855e+06	136.93	801
COPG1	0.974871	4	3.1616e+06	97.4871	802
NAGK	1.29034	7	3.16138e+06	129.034	803
RAB11A	0.413749	7	3.16101e+06	41.3749	804
EZR	1.33698	7	3.16092e+06	133.698	805
MYO7B	1.13352	4	3.16063e+06	113.352	806
KRT77	0.288762	7	3.15639e+06	28.8762	807
A2ML1	1.33912	4	3.15217e+06	133.912	808
ARL2	0.22836	7	3.14878e+06	22.836	809
METAP1	0.553287	7	3.13432e+06	55.3287	810
CALD1	1.63721	7	3.11262e+06	163.721	811
SYNPO2	0.458588	7	3.10749e+06	45.8588	812
APEH	0.927412	7	3.10578e+06	92.7412	813
GUSB	0.419047	7	3.10084e+06	41.9047	814
TNS2	1.36352	7	3.09972e+06	136.352	815
LDHA	0.749028	7	3.0535e+06	74.9028	816
FMOD	1.87236	6	3.04866e+06	187.236	817
CDH5	0.328989	7	3.04276e+06	32.8989	818
TYMP	0.732014	7	3.03245e+06	73.2014	819
PSMC2	0.636964	7	3.02862e+06	63.6964	820
INA	0.294887	7	3.02741e+06	29.4887	821
PARP14	0.914866	7	3.02563e+06	91.4866	822
ALDH1A2	0.2385	5	3.02217e+06	23.85	823
CUL1	1.14186	6	3.01491e+06	114.186	824
DCN	0.532355	7	3.01304e+06	53.2355	825
PPIB	0.806937	7	3.00742e+06	80.6937	826
RAN	1.53492	5	2.99874e+06	153.492	827
TP53I3	0.575253	6	2.99482e+06	57.5253	828
POTEKP	0.222191	7	2.98955e+06	22.2191	829
CFHR2	0.340545	7	2.98828e+06	34.0545	830
GSR	0.673474	7	2.96419e+06	67.3474	831
SNX30	0.0705795	7	2.94843e+06	7.05795	832
LPCAT2	1.72024	5	2.94204e+06	172.024	833
NUFIP2	0.205348	6	2.93277e+06	20.5348	834
HNRNPK	0.751906	4	2.92442e+06	75.1906	835
HEBP1	0.490961	7	2.91522e+06	49.0961	836
FCN2	0.582414	7	2.89589e+06	58.2414	837
STAT1	0.708235	7	2.89569e+06	70.8235	838
CPB1	1.49056	7	2.89094e+06	149.056	839
GFPT1	0.713409	7	2.87805e+06	71.3409	840
STAMBP	0.607439	5	2.86792e+06	60.7439	841
CEACAM8	0.466189	7	2.8486e+06	46.6189	842
ZC3HAV1	1.08758	7	2.84144e+06	108.758	843
PGM1	0.905988	7	2.84056e+06	90.5988	844
FCGBP	0.558751	7	2.83699e+06	55.8751	845
CFL1	1.16306	7	2.83609e+06	116.306	846
KANK2	0.676067	7	2.83568e+06	67.6067	847
IGKV1-9	0.298962	7	2.83486e+06	29.8962	848
TPD52L2	1.50185	7	2.83052e+06	150.185	849
TOP2B	0.653822	7	2.82467e+06	65.3822	850
ACY1	2.12619	7	2.80692e+06	212.619	851
TNFRSF21	0.442435	4	2.79925e+06	44.2435	852
UBE3A	1.28153	7	2.79918e+06	128.153	853
IGHV3-9	0.269387	7	2.79271e+06	26.9387	854
APOF	0.294206	7	2.78617e+06	29.4206	855
CSN3	1.21588	7	2.78421e+06	121.588	856
RPN2	0.742606	6	2.78005e+06	74.2606	857
CPNE3	1.50476	4	2.77441e+06	150.476	858
PKP2	0.378101	5	2.75781e+06	37.8101	859
MCTS1	0.536483	5	2.75546e+06	53.6483	860
IGHV1-18	0.406037	7	2.7547e+06	40.6037	861
COL1A2	1.33729	7	2.73962e+06	133.729	862
LMNA	0.942413	7	2.7367e+06	94.2413	863
SAA1	0.310327	7	2.73383e+06	31.0327	864
TPM4	1.49203	7	2.72993e+06	149.203	865
HSD17B4	1.3141	4	2.72387e+06	131.41	866
APEX1	0.37377	7	2.7178e+06	37.377	867
PPBP	0.257822	7	2.71683e+06	25.7822	868
PPP2R5A	1.55766	4	2.6952e+06	155.766	869
MYOC	0.486776	4	2.69486e+06	48.6776	870
SEPTIN7	0.510311	7	2.67246e+06	51.0311	871
SGCB	1.36841	4	2.67224e+06	136.841	872
FBN2	2.12598	7	2.66985e+06	212.598	873
PLGLA	0.340237	7	2.66175e+06	34.0237	874
HSP90AA1	0.890697	7	2.65969e+06	89.0697	875
CAMK2D	0.264801	7	2.65832e+06	26.4801	876
CACNA2D1	1.05701	7	2.65636e+06	105.701	877
AKR1C3	0.822129	7	2.65594e+06	82.2129	878
IGKV1-12	0.221106	7	2.64081e+06	22.1106	879
IGKV1D-12	0.221106	7	2.64081e+06	22.1106	880
DHX15	2.04241	7	2.63914e+06	204.241	881
COPB1	0.797196	7	2.63618e+06	79.7196	882
WAPL	0.39412	5	2.63519e+06	39.412	883
MYL4	0.155033	4	2.6305e+06	15.5033	884
PRG4	0.241949	7	2.61146e+06	24.1949	885
GGH	0.81299	7	2.6027e+06	81.299	886
TUBA4A	1.43751	7	2.58352e+06	143.751	887
IGHV1-3	0.254059	7	2.58022e+06	25.4059	888
YWHAZ	1.43501	7	2.57852e+06	143.501	889
POTEI	0.297742	7	2.5639e+06	29.7742	890
TUBB8	1.68783	7	2.55699e+06	168.783	891
SSB	0.295533	7	2.5557e+06	29.5533	892
SMARCA5	0.763586	7	2.55461e+06	76.3586	893
CALB1	0.504232	4	2.55343e+06	50.4232	894
DDAH2	1.31568	4	2.55155e+06	131.568	895
SNX1	1.15122	5	2.54862e+06	115.122	896
MAP1B	0.858077	7	2.53583e+06	85.8077	897
NPM1	0.806625	7	2.53259e+06	80.6625	898
CAPRIN1	0.860807	5	2.52695e+06	86.0807	899
VPS35L	0.346379	4	2.51561e+06	34.6379	900
IGKV1-27	0.219479	7	2.50587e+06	21.9479	901
PPP5C	1.4811	5	2.50166e+06	148.11	902
MATR3	0.496254	7	2.49617e+06	49.6254	903
TUBA1C	1.47533	7	2.49015e+06	147.533	904
ITPR1	0.213618	7	2.48905e+06	21.3618	905
PSMD8	0.694853	5	2.48231e+06	69.4853	906
IGHV3-11	0.253479	7	2.48055e+06	25.3479	907
IGHV3-20	0.253479	7	2.48055e+06	25.3479	908
IGHV3-21	0.253479	7	2.48055e+06	25.3479	909
USO1	0.633575	7	2.47441e+06	63.3575	910
CAND1	0.978217	6	2.46977e+06	97.8217	911
DHTKD1	0.520768	4	2.46872e+06	52.0768	912
CTTN	0.443452	7	2.46542e+06	44.3452	913
AP2A2	0.885832	7	2.4649e+06	88.5832	914
NDUFA9	0.0934827	4	2.46425e+06	9.34827	915
ALDH7A1	0.891189	7	2.45966e+06	89.1189	916
CCT6A	1.34122	4	2.43463e+06	134.122	917
SEH1L	0.548739	7	2.43065e+06	54.8739	918
AMY2A	1.45656	6	2.41968e+06	145.656	919
MCCC2	0.179768	5	2.41748e+06	17.9768	920
IGLV2-18	0.0971594	7	2.41643e+06	9.71594	921
ABHD14B	1.09823	7	2.41518e+06	109.823	922
PLEK	0.566653	7	2.41436e+06	56.6653	923
EVPL	1.15153	7	2.41136e+06	115.153	924
ABCD3	1.0214	5	2.40703e+06	102.14	925
DPP4	1.37845	7	2.40439e+06	137.845	926
KRT87P	0.604715	4	2.39342e+06	60.4715	927
THBS2	1.34573	7	2.38546e+06	134.573	928
DSC1	0.861616	6	2.37468e+06	86.1616	929
PSMA1	1.78375	7	2.37223e+06	178.375	930
ANK1	0.390621	7	2.37008e+06	39.0621	931
TAGLN2	0.559307	7	2.36854e+06	55.9307	932
DPYSL2	0.80217	7	2.36739e+06	80.217	933
WDR1	1.06518	7	2.36737e+06	106.518	934
PON3	0.279291	7	2.36222e+06	27.9291	935
SOD2	1.31257	7	2.36126e+06	131.257	936
IGHV3-13	0.254622	7	2.34442e+06	25.4622	937
IGHV3-43	0.254622	7	2.34442e+06	25.4622	938
IGHV3-43D	0.254622	7	2.34442e+06	25.4622	939
POTEJ	0.316956	7	2.3353e+06	31.6956	940
TUBA1B	1.6001	7	2.33228e+06	160.01	941
SERPINE1	0.240325	7	2.32403e+06	24.0325	942
TANGO2	1.83426	5	2.32056e+06	183.426	943
HADHB	0.313441	7	2.31846e+06	31.3441	944
IGLV6-57	0.104415	7	2.31721e+06	10.4415	945
TUBA1A	1.61865	7	2.30127e+06	161.865	946
BCAN	0.807685	6	2.29177e+06	80.7685	947
CHD4	1.48661	6	2.27839e+06	148.661	948
VPS11	0.389217	7	2.27687e+06	38.9217	949
MASP1	0.234191	7	2.27552e+06	23.4191	950
MST1	0.550704	7	2.26812e+06	55.0704	951
SEMG2	0.801608	7	2.26785e+06	80.1608	952
BIN3	0.198694	4	2.26008e+06	19.8694	953
MNDA	0.270531	7	2.25812e+06	27.0531	954
HK1	1.01444	7	2.25346e+06	101.444	955
ALDOB	0.673507	7	2.24511e+06	67.3507	956
ALDH1B1	0.650792	6	2.23148e+06	65.0792	957
PUM3	1.5666	4	2.22633e+06	156.66	958
PI4KA	1.02771	6	2.22231e+06	102.771	959
ICAM1	2.2242	7	2.22093e+06	222.42	960
CAPG	0.383159	7	2.21294e+06	38.3159	961
CSNK2A1	0.887534	7	2.20923e+06	88.7534	962
CFD	1.05857	7	2.20876e+06	105.857	963
PTBP3	0.445476	6	2.20169e+06	44.5476	964
CORO1B	0.226374	7	2.19438e+06	22.6374	965
FER1L4	0.226374	7	2.19438e+06	22.6374	966
SRGN	1.04413	5	2.19318e+06	104.413	967
MRPS5	0.257467	4	2.19187e+06	25.7467	968
KARS1	0.665924	5	2.18746e+06	66.5924	969
VIM	0.691212	7	2.1856e+06	69.1212	970
PCBD1	1.51282	4	2.18545e+06	151.282	971
ACAT1	1.49161	6	2.17991e+06	149.161	972
MYO18A	0.608329	4	2.17735e+06	60.8329	973
HMOX1	0.552113	7	2.17559e+06	55.2113	974
TARS1	1.51484	6	2.17236e+06	151.484	975
MMP2	0.973396	7	2.17143e+06	97.3396	976
RCN1	0.571917	7	2.16868e+06	57.1917	977
VASP	1.40085	7	2.16006e+06	140.085	978
CHD5	1.67945	4	2.15551e+06	167.945	979
TLK1	0.149271	4	2.15347e+06	14.9271	980
TLK2	0.149271	4	2.15347e+06	14.9271	981
IGKV1-6	0.252055	7	2.14719e+06	25.2055	982
IGKV1-39	0.366244	7	2.14707e+06	36.6244	983
IGKV1D-39	0.366244	7	2.14707e+06	36.6244	984
DDX46	0.649517	6	2.14421e+06	64.9517	985
CARS1	0.858473	6	2.14406e+06	85.8473	986
CLTCL1	1.27587	6	2.13893e+06	127.587	987
CPM	0.967204	6	2.1377e+06	96.7204	988
PYGB	2.11283	7	2.13251e+06	211.283	989
P3H1	1.29462	4	2.13078e+06	129.462	990
ZCRB1	0.197723	4	2.12198e+06	19.7723	991
PLAA	0.956675	5	2.12159e+06	95.6675	992
FUBP3	0.801152	7	2.11898e+06	80.1152	993
NNMT	0.0969162	7	2.11878e+06	9.69162	994
PANK4	0.748003	6	2.11557e+06	74.8003	995
CST3	0.142086	7	2.1155e+06	14.2086	996
GLUD2	1.89062	5	2.11426e+06	189.062	997
POTEE	0.246068	7	2.112e+06	24.6068	998
BCL2L15	0.852646	7	2.11127e+06	85.2646	999
NUP153	1.06494	5	2.10923e+06	106.494	1000
ADGRB3	0.29828	7	2.10449e+06	29.828	1001
TIMP1	0.705966	6	2.10205e+06	70.5966	1002
SLC30A7	0.166207	7	2.10189e+06	16.6207	1003
PTPRC	1.08933	7	2.10067e+06	108.933	1004
ABI3BP	0.44443	7	2.09812e+06	44.443	1005
HSPA1A	0.926212	7	2.0965e+06	92.6212	1006
HSPA1B	0.926212	7	2.0965e+06	92.6212	1007
CEP170	1.54598	7	2.089e+06	154.598	1008
MYH11	0.519291	7	2.07937e+06	51.9291	1009
IGHV1-24	0.410102	7	2.07842e+06	41.0102	1010
F13B	0.194153	7	2.0763e+06	19.4153	1011
IGLV1-36	0.214386	7	2.07024e+06	21.4386	1012
KTN1	0.823378	6	2.06746e+06	82.3378	1013
SELL	0.499002	7	2.06695e+06	49.9002	1014
TNR	1.06172	4	2.06414e+06	106.172	1015
ITGA6	0.785685	4	2.06371e+06	78.5685	1016
EIF5A	0.561096	4	2.06024e+06	56.1096	1017
IGFBP5	0.633307	4	2.05311e+06	63.3307	1018
PDIA6	0.269643	6	2.05031e+06	26.9643	1019
PSMC5	1.31537	7	2.0454e+06	131.537	1020
EFEMP1	0.374798	7	2.04494e+06	37.4798	1021
CSN1S1	0.524297	7	2.04295e+06	52.4297	1022
ABAT	2.03571	6	2.03003e+06	203.571	1023
TNS1	0.373807	7	2.02239e+06	37.3807	1024
CDC42BPB	1.50458	4	2.01176e+06	150.458	1025
SACM1L	0.585938	7	1.99238e+06	58.5938	1026
CHMP4A	0.639376	7	1.98642e+06	63.9376	1027
GSDMA	0.876761	4	1.98572e+06	87.6761	1028
TOLLIP	1.26247	7	1.98054e+06	126.247	1029
ELAVL1	1.0802	4	1.96296e+06	108.02	1030
AP3B1	1.15269	6	1.95826e+06	115.269	1031
AHR	0.264801	6	1.95786e+06	26.4801	1032
ALDH2	0.755162	7	1.95711e+06	75.5162	1033
S100A9	0.928952	7	1.95274e+06	92.8952	1034
NUCB1	0.908934	5	1.93888e+06	90.8934	1035
GNL1	1.15791	6	1.9286e+06	115.791	1036
CC2D1B	0.510131	4	1.9222e+06	51.0131	1037
FETUB	0.1946	7	1.92195e+06	19.46	1038
MTA2	0.856292	6	1.91956e+06	85.6292	1039
TMTC3	0.557428	4	1.91956e+06	55.7428	1040
ATG9A	0.574959	7	1.91909e+06	57.4959	1041
CDC73	1.13531	6	1.91556e+06	113.531	1042
IGKV1-16	0.145696	7	1.91138e+06	14.5696	1043
BTAF1	0.016925	4	1.90968e+06	1.6925	1044
VCAM1	0.561999	7	1.8979e+06	56.1999	1045
AMPD3	0.317443	7	1.8967e+06	31.7443	1046
IGLV9-49	0.441749	7	1.89572e+06	44.1749	1047
ACTN4	0.567185	7	1.88097e+06	56.7185	1048
PTER	0.567291	6	1.87926e+06	56.7291	1049
POTEF	0.277811	7	1.87716e+06	27.7811	1050
BCAR1	0.148741	4	1.87575e+06	14.8741	1051
ECPAS	1.0342	7	1.86872e+06	103.42	1052
CXADR	0.776227	6	1.8581e+06	77.6227	1053
ATP1A1	0.803137	7	1.85727e+06	80.3137	1054
NPEPPS	1.10432	7	1.83965e+06	110.432	1055
PGD	0.464433	7	1.83957e+06	46.4433	1056
PTPRJ	1.20591	7	1.83775e+06	120.591	1057
HSP90AB3P	2.0455	7	1.83677e+06	204.55	1058
CNDP2	1.05067	7	1.83144e+06	105.067	1059
GRSF1	0.820003	4	1.83022e+06	82.0003	1060
RPSA	0.930849	7	1.82583e+06	93.0849	1061
ABHD16A	0.485377	6	1.82189e+06	48.5377	1062
FLOT2	0.498058	4	1.82091e+06	49.8058	1063
SAA2	0.282442	7	1.81799e+06	28.2442	1064
MMP9	0.475891	7	1.81728e+06	47.5891	1065
EPX	0.561863	5	1.81435e+06	56.1863	1066
FLAD1	0.964209	4	1.8022e+06	96.4209	1067
KRT72	0.173512	7	1.79212e+06	17.3512	1068
DSG2	0.94678	5	1.79044e+06	94.678	1069
SQOR	1.85404	7	1.78736e+06	185.404	1070
LARS1	1.33708	4	1.78365e+06	133.708	1071
PSMB10	0.994354	7	1.78195e+06	99.4354	1072
ATP5F1D	0.788184	6	1.77588e+06	78.8184	1073
FTH1	0.712742	6	1.77574e+06	71.2742	1074
SPTBN1	1.68056	7	1.77293e+06	168.056	1075
ATIC	0.947413	7	1.76859e+06	94.7413	1076
SUN2	0.592603	7	1.75652e+06	59.2603	1077
KRT71	0.177376	7	1.75495e+06	17.7376	1078
KRT74	0.177376	7	1.75495e+06	17.7376	1079
LRP2	0.429389	6	1.75156e+06	42.9389	1080
ABHD11	1.63207	5	1.74167e+06	163.207	1081
ARF1	0.905717	7	1.73497e+06	90.5717	1082
ARF3	0.905717	7	1.73497e+06	90.5717	1083
SF3B6	1.39776	6	1.73069e+06	139.776	1084
AGL	1.04751	6	1.72161e+06	104.751	1085
MMS19	1.14179	7	1.72067e+06	114.179	1086
IGKV1-17	0.392201	7	1.72055e+06	39.2201	1087
PNLIPRP1	1.03565	4	1.72053e+06	103.565	1088
TNS3	0.228538	7	1.71687e+06	22.8538	1089
SARM1	0.65296	5	1.71497e+06	65.296	1090
DDX18	0.876565	7	1.71198e+06	87.6565	1091
KRT85	1.03009	7	1.70486e+06	103.009	1092
RCN3	1.4236	4	1.70394e+06	142.36	1093
ADH5	0.878091	7	1.69613e+06	87.8091	1094
UPF2	0.66333	4	1.69092e+06	66.333	1095
SART3	1.2465	6	1.6684e+06	124.65	1096
MAN2B1	1.30738	5	1.66144e+06	130.738	1097
APP	0.553428	7	1.65238e+06	55.3428	1098
MYL6	1.74993	7	1.64762e+06	174.993	1099
ANKHD1	0.594302	5	1.64618e+06	59.4302	1100
H1-5	1.10433	7	1.63742e+06	110.433	1101
FBN1	0.788126	7	1.6315e+06	78.8126	1102
KRT83	1.09067	7	1.62237e+06	109.067	1103
CAPN1	0.769695	7	1.62165e+06	76.9695	1104
COL4A6	1.6591	4	1.6189e+06	165.91	1105
MBL2	0.435035	7	1.61714e+06	43.5035	1106
SRSF1	0.479489	7	1.61374e+06	47.9489	1107
CNTN1	1.22671	7	1.60855e+06	122.671	1108
PCSK9	1.13282	6	1.60544e+06	113.282	1109
BLVRB	0.681827	7	1.60401e+06	68.1827	1110
FUT3	0.19426	4	1.6019e+06	19.426	1111
FUT5	0.19426	4	1.6019e+06	19.426	1112
DLD	0.823762	7	1.6014e+06	82.3762	1113
F7	1.75128	6	1.60066e+06	175.128	1114
SCRN1	0.828206	4	1.59347e+06	82.8206	1115
REG1A	0.533555	4	1.58643e+06	53.3555	1116
ARPC2	1.45483	7	1.58156e+06	145.483	1117
KRT13	1.56665	7	1.57478e+06	156.665	1118
NLRX1	0.124653	4	1.57399e+06	12.4653	1119
PDCD10	0.627275	5	1.57171e+06	62.7275	1120
RPL17	0.881999	4	1.57156e+06	88.1999	1121
PCYT1A	0.775437	7	1.569e+06	77.5437	1122
MRPS9	0.520228	7	1.56687e+06	52.0228	1123
PRDX4	0.772146	4	1.56578e+06	77.2146	1124
LIPF	1.08079	5	1.56022e+06	108.079	1125
STT3B	0.549216	5	1.55683e+06	54.9216	1126
COX5A	1.00016	5	1.55111e+06	100.016	1127
MST1L	0.673398	7	1.55044e+06	67.3398	1128
XRN2	0.409645	7	1.54835e+06	40.9645	1129
TTLL12	1.32979	7	1.5425e+06	132.979	1130
VCAN	0.527599	7	1.54079e+06	52.7599	1131
ARHGDIB	0.543101	6	1.53571e+06	54.3101	1132
KCTD12	0.174322	7	1.53387e+06	17.4322	1133
UQCRC1	1.36257	5	1.5332e+06	136.257	1134
AK2	0.314339	7	1.53267e+06	31.4339	1135
GAPVD1	0.807899	6	1.52929e+06	80.79	1136
NME1	1.76309	6	1.52763e+06	176.309	1137
C4BPB	0.524109	7	1.52669e+06	52.4109	1138
EHD4	0.714707	7	1.52627e+06	71.4707	1139
PRDX3	1.61003	4	1.51645e+06	161.003	1140
EHD3	1.05724	4	1.51461e+06	105.724	1141
PLCH1	0.329302	7	1.51323e+06	32.9302	1142
MPST	0.743254	4	1.51016e+06	74.3254	1143
CTNNA1	1.20443	7	1.50612e+06	120.443	1144
COMMD9	0.527463	5	1.50256e+06	52.7463	1145
MYO1E	1.30013	7	1.50153e+06	130.013	1146
CLUH	0.568053	5	1.49974e+06	56.8053	1147
SMAD1	0.138355	4	1.49765e+06	13.8355	1148
SMAD5	0.138355	4	1.49765e+06	13.8355	1149
SMAD9	0.138355	4	1.49765e+06	13.8355	1150
GLA	0.199365	4	1.49256e+06	19.9365	1151
NANS	0.200623	4	1.49172e+06	20.0623	1152
PGM2	1.112	7	1.49082e+06	111.2	1153
DBH	0.695275	7	1.48727e+06	69.5275	1154
SET	0.140455	7	1.48489e+06	14.0455	1155
SETSIP	0.140455	7	1.48489e+06	14.0455	1156
HYOU1	1.24841	7	1.48334e+06	124.841	1157
ACSL3	1.7679	7	1.48227e+06	176.79	1158
AKR1A1	0.556742	7	1.48198e+06	55.6742	1159
HNRNPDL	1.39661	6	1.4801e+06	139.661	1160
ACO1	0.516608	4	1.47902e+06	51.6608	1161
GM2A	0.951988	4	1.47801e+06	95.1988	1162
IGHV4-39	0.569725	7	1.47716e+06	56.9725	1163
USP39	0.639297	6	1.47637e+06	63.9297	1164
FMNL2	0.715595	4	1.47449e+06	71.5595	1165
LRRFIP1	1.57793	4	1.47334e+06	157.793	1166
NCAN	1.14961	5	1.47229e+06	114.961	1167
CDHR2	0.693647	7	1.47221e+06	69.3647	1168
HSPA12B	1.13472	5	1.47013e+06	113.472	1169
CLIC1	1.67016	5	1.46972e+06	167.016	1170
CTSC	0.637257	5	1.46571e+06	63.7257	1171
EIF2S2	1.02272	4	1.4631e+06	102.272	1172
ATAD1	0.425239	4	1.46184e+06	42.5239	1173
ADAMTS13	0.395314	7	1.45977e+06	39.5314	1174
ISLR	0.458687	4	1.45974e+06	45.8687	1175
APOBR	0.486987	5	1.45958e+06	48.6987	1176
DST	0.758557	4	1.45607e+06	75.8557	1177
CPQ	1.28354	5	1.45437e+06	128.354	1178
ARHGDIA	0.872269	6	1.44238e+06	87.2269	1179
NAMPT	0.914575	7	1.44206e+06	91.4575	1180
KRT81	1.19648	7	1.43821e+06	119.648	1181
KRT86	1.19648	7	1.43821e+06	119.648	1182
MBD2	0.396619	5	1.43738e+06	39.6619	1183
IGHV4-34	0.409266	7	1.43722e+06	40.9266	1184
CLPP	1.1064	5	1.42671e+06	110.64	1185
OLA1	1.27273	6	1.42612e+06	127.273	1186
MYH10	0.47227	7	1.42591e+06	47.227	1187
PSAP	1.55323	5	1.42295e+06	155.323	1188
IGFBP7	1.79326	5	1.42141e+06	179.326	1189
NOLC1	0.6026	4	1.41802e+06	60.26	1190
NUP133	0.583738	7	1.4081e+06	58.3738	1191
ANTXR1	0.607029	7	1.40787e+06	60.7029	1192
AP3D1	1.10371	7	1.40629e+06	110.371	1193
APLP1	1.52736	7	1.40388e+06	152.736	1194
PEPD	0.655405	7	1.39885e+06	65.5405	1195
IGHV3-64	0.292899	7	1.39142e+06	29.2899	1196
SMARCC1	0.88537	4	1.39112e+06	88.537	1197
UBTF	0.227849	4	1.3907e+06	22.7849	1198
ADD1	1.16288	5	1.38867e+06	116.288	1199
FBP1	0.807141	7	1.37202e+06	80.7141	1200
BCL2L13	1.53685	4	1.37178e+06	153.685	1201
GCA	0.658432	5	1.36892e+06	65.8432	1202
ACACA	0.216034	7	1.36693e+06	21.6034	1203
NCAM2	0.915053	6	1.36681e+06	91.5053	1204
SRC	1.92395	7	1.36287e+06	192.395	1205
CLASP1	0.743165	6	1.36137e+06	74.3165	1206
EIF3J	0.312506	7	1.35953e+06	31.2506	1207
PRSS57	0.428826	7	1.35952e+06	42.8826	1208
EHD2	1.45316	5	1.3583e+06	145.316	1209
WDR12	0.179525	7	1.35792e+06	17.9525	1210
ILF2	1.44636	4	1.35292e+06	144.636	1211
SARS1	1.23278	6	1.35183e+06	123.278	1212
MAP2K2	0.819431	4	1.35143e+06	81.9431	1213
STK39	1.63152	6	1.34999e+06	163.152	1214
NHLRC2	0.62283	5	1.34954e+06	62.283	1215
TBCD	0.20003	7	1.34897e+06	20.003	1216
IGHV1-8	0.492186	7	1.34838e+06	49.2186	1217
MFGE8	0.336849	5	1.34663e+06	33.6849	1218
PCYOX1	0.481501	7	1.34638e+06	48.1501	1219
CCDC22	0.685978	7	1.34585e+06	68.5978	1220
ZYX	0.76212	7	1.34313e+06	76.212	1221
PRB3	0.628656	7	1.3408e+06	62.8656	1222
TGM1	0.671528	7	1.34069e+06	67.1528	1223
COPS4	1.664	5	1.34019e+06	166.4	1224
MANBA	0.213486	7	1.33881e+06	21.3486	1225
PGPEP1	1.03937	5	1.33332e+06	103.937	1226
CBLB	0.466626	4	1.33206e+06	46.6626	1227
PPIA	1.61974	7	1.32967e+06	161.974	1228
SNX2	0.895623	6	1.32733e+06	89.5623	1229
NAPSA	0.20972	6	1.32173e+06	20.972	1230
C20orf27	0.234779	7	1.32014e+06	23.4779	1231
CLIP1	0.436161	5	1.31935e+06	43.6161	1232
MSLN	0.321354	4	1.31598e+06	32.1354	1233
LMAN2L	1.01175	5	1.31364e+06	101.175	1234
ALDOC	0.926477	7	1.30741e+06	92.6477	1235
CYP51A1	0.178978	7	1.30655e+06	17.8978	1236
SCG3	0.180559	4	1.30653e+06	18.0559	1237
RASA1	0.755133	4	1.30371e+06	75.5133	1238
LYVE1	0.733943	7	1.29913e+06	73.3943	1239
UBE2V1	0.338218	5	1.29687e+06	33.8218	1240
SIN3A	0.816704	4	1.29672e+06	81.6704	1241
STXBP3	0.665119	4	1.29632e+06	66.5119	1242
KRT7	1.27633	7	1.29399e+06	127.633	1243
EXOC4	1.02335	4	1.29261e+06	102.335	1244
MGAM	0.153368	4	1.28805e+06	15.3368	1245
L1CAM	1.26529	5	1.2864e+06	126.529	1246
MASP2	0.350003	7	1.28583e+06	35.0003	1247
HNRNPUL1	0.368894	7	1.28233e+06	36.8894	1248
GART	0.573816	6	1.27979e+06	57.3816	1249
RABGGTB	0.443811	4	1.27408e+06	44.3811	1250
MTHFD1	0.540477	7	1.27406e+06	54.0477	1251
UBAP2L	0.396743	7	1.27253e+06	39.6743	1252
MUC5AC	0.198319	5	1.26661e+06	19.8319	1253
IGLV1-44	0.274037	7	1.26414e+06	27.4037	1254
NEGR1	0.75123	5	1.26348e+06	75.123	1255
SYNE2	1.17539	7	1.26056e+06	117.539	1256
FAM98A	0.772198	4	1.26015e+06	77.2198	1257
IGKV1-13	0.267554	7	1.25955e+06	26.7554	1258
IGKV1D-13	0.267554	7	1.25955e+06	26.7554	1259
IGHV4-30-4	0.224526	7	1.25716e+06	22.4526	1260
IGHV4-38-2	0.224526	7	1.25716e+06	22.4526	1261
IGHV4-59	0.224526	7	1.25716e+06	22.4526	1262
IGHV4-61	0.224526	7	1.25716e+06	22.4526	1263
PEA15	0.985774	6	1.25506e+06	98.5774	1264
CAPS	0.576752	5	1.25081e+06	57.6752	1265
KRT76	0.739544	7	1.2505e+06	73.9544	1266
FHOD1	1.34221	6	1.25017e+06	134.221	1267
IGHV1-69	0.137329	7	1.24853e+06	13.7329	1268
KRT3	0.739584	7	1.24526e+06	73.9584	1269
EFTUD2	0.562919	7	1.24322e+06	56.2919	1270
PRKCD	0.562073	5	1.23655e+06	56.2073	1271
TSPAN15	0.798091	4	1.23636e+06	79.8091	1272
FAP	1.08067	4	1.23466e+06	108.067	1273
SUN1	0.595736	4	1.23341e+06	59.5736	1274
RIDA	0.626209	5	1.22989e+06	62.6209	1275
GOLM1	0.261931	7	1.22647e+06	26.1931	1276
UMOD	1.40595	6	1.22626e+06	140.595	1277
ARHGAP4	1.39517	6	1.2242e+06	139.517	1278
HLA-DQB1	0.38245	4	1.22205e+06	38.245	1279
GNAQ	0.358787	7	1.22068e+06	35.8787	1280
DHX9	0.374577	7	1.22031e+06	37.4577	1281
EIF3F	0.589603	5	1.21883e+06	58.9603	1282
COMP	0.30244	7	1.21661e+06	30.244	1283
COPS6	0.515563	4	1.21267e+06	51.5563	1284
EIF3A	1.48354	7	1.21241e+06	148.354	1285
PSMB1	0.951345	4	1.20948e+06	95.1345	1286
RSU1	1.49074	4	1.20781e+06	149.074	1287
CMPK1	0.559248	7	1.20767e+06	55.9248	1288
AKAP17A	0.182247	6	1.20623e+06	18.2247	1289
LEPR	0.818742	5	1.20611e+06	81.8742	1290
SLC12A2	1.42172	7	1.18906e+06	142.172	1291
OGDH	0.765566	7	1.18897e+06	76.5566	1292
TFAP2A	0.256609	5	1.1867e+06	25.6609	1293
TFAP2B	0.256609	5	1.1867e+06	25.6609	1294
TFAP2E	0.256609	5	1.1867e+06	25.6609	1295
FLRT3	0.158434	4	1.18613e+06	15.8434	1296
AP1B1	1.1453	7	1.18493e+06	114.53	1297
IGLV2-14	0.510985	7	1.18125e+06	51.0985	1298
USP15	0.569678	5	1.17669e+06	56.9678	1299
EIF4ENIF1	0.278526	7	1.17422e+06	27.8526	1300
TRIP4	0.20982	4	1.17231e+06	20.982	1301
DTX3L	1.25871	6	1.17117e+06	125.871	1302
AOC1	1.10024	4	1.16276e+06	110.024	1303
PNLIP	0.605155	5	1.16072e+06	60.5155	1304
MGAM2	0.649771	5	1.15676e+06	64.9771	1305
OPA1	0.640222	5	1.15445e+06	64.0222	1306
COPB2	0.798398	6	1.15441e+06	79.8398	1307
MAT2A	1.03524	6	1.15417e+06	103.524	1308
PFAS	1.01266	4	1.15415e+06	101.266	1309
AGR3	0.791821	6	1.15085e+06	79.1821	1310
CTNNA2	1.09178	6	1.14719e+06	109.178	1311
EIF4G1	0.973615	7	1.14607e+06	97.3615	1312
SRSF5	1.11048	4	1.14423e+06	111.048	1313
RNF213	1.32632	4	1.14376e+06	132.632	1314
PKP3	0.554618	4	1.14366e+06	55.4618	1315
ACACB	0.0829935	7	1.14131e+06	8.29935	1316
HADH	0.236486	6	1.14051e+06	23.6486	1317
PXN	0.823763	6	1.13965e+06	82.3763	1318
RPIA	0.35614	6	1.1362e+06	35.614	1319
SAMM50	0.760089	5	1.1355e+06	76.0089	1320
C1QBP	0.865137	4	1.13453e+06	86.5137	1321
AQR	1.06541	5	1.13207e+06	106.541	1322
S100A4	0.863826	7	1.13193e+06	86.3826	1323
CACYBP	1.39374	4	1.12735e+06	139.374	1324
PSMA2	0.767795	4	1.12703e+06	76.7795	1325
AMY2B	1.89511	6	1.12478e+06	189.511	1326
CRYZ	0.619605	6	1.11993e+06	61.9605	1327
SCFD1	1.26924	5	1.11821e+06	126.924	1328
SERPINB5	0.848277	5	1.11505e+06	84.8277	1329
SDCBP	0.499477	6	1.11396e+06	49.9477	1330
STRN	0.665603	4	1.11277e+06	66.5603	1331
CRNKL1	0.525137	5	1.11216e+06	52.5137	1332
TOP1	0.331894	7	1.10849e+06	33.1894	1333
RAB34	0.329526	6	1.10766e+06	32.9526	1334
CCDC6	0.764928	4	1.10605e+06	76.4928	1335
OMD	0.687217	7	1.10524e+06	68.7217	1336
NADK	1.53522	4	1.10236e+06	153.522	1337
ANXA1	1.41451	4	1.09927e+06	141.451	1338
CTPS1	0.835271	6	1.09448e+06	83.5271	1339
ALDH6A1	0.454007	4	1.09324e+06	45.4007	1340
G3BP1	0.658061	6	1.09255e+06	65.8061	1341
LARP7	0.615395	5	1.09127e+06	61.5395	1342
IGHV1-69D	0.258586	7	1.08688e+06	25.8586	1343
ADD2	0.422227	6	1.0829e+06	42.2227	1344
GSTK1	0.533234	4	1.08073e+06	53.3234	1345
FDPS	0.12452	5	1.0794e+06	12.452	1346
PSMA7	0.588779	7	1.07917e+06	58.8779	1347
IGF1	0.853475	7	1.0766e+06	85.3475	1348
RAD23B	0.655924	5	1.07448e+06	65.5924	1349
OGN	0.404736	6	1.0732e+06	40.4736	1350
PLIN2	0.569576	5	1.07114e+06	56.9576	1351
ABCC2	0.299513	7	1.07062e+06	29.9513	1352
CNOT1	1.03731	4	1.06998e+06	103.731	1353
GFAP	0.194841	7	1.06987e+06	19.4841	1354
CNPY3	0.0988879	5	1.06961e+06	9.88879	1355
SYMPK	1.20684	4	1.06805e+06	120.684	1356
RFC5	1.0356	4	1.0674e+06	103.56	1357
PTBP1	0.951546	7	1.06562e+06	95.1546	1358
LAMB3	0.228613	4	1.06276e+06	22.8613	1359
PLA2G7	1.18397	6	1.05721e+06	118.397	1360
PSMA8	0.619704	7	1.05593e+06	61.9704	1361
RAD50	1.03849	5	1.05453e+06	103.849	1362
WIPI2	0.847332	4	1.05267e+06	84.7332	1363
OTC	0.77396	6	1.05056e+06	77.396	1364
HNRNPA2B1	0.761845	7	1.05005e+06	76.1845	1365
HDHD2	0.661867	7	1.0487e+06	66.1867	1366
CEACAM1	0.556635	7	1.0477e+06	55.6635	1367
NT5E	1.36096	7	1.0471e+06	136.096	1368
DNAJB1	0.73265	7	1.04028e+06	73.265	1369
IGLV1-40	0.360755	7	1.03935e+06	36.0755	1370
RARS1	0.393173	6	1.03859e+06	39.3173	1371
UQCRC2	0.798263	7	1.03352e+06	79.8263	1372
AMY1A	1.85885	7	1.0328e+06	185.885	1373
TOP1MT	0.287263	7	1.03195e+06	28.7263	1374
NCKAP1	0.957514	5	1.03194e+06	95.7514	1375
ILVBL	0.801262	6	1.03086e+06	80.1262	1376
SRRT	1.08815	4	1.02908e+06	108.815	1377
NBAS	0.201046	7	1.02604e+06	20.1046	1378
LMAN1	0.761164	6	1.02433e+06	76.1164	1379
FBXW11	0.640003	4	1.02318e+06	64.0003	1380
TOM1	0.678709	4	1.02111e+06	67.8709	1381
SLC16A2	0.144935	4	1.02041e+06	14.4935	1382
NCOR1	1.34316	4	1.01761e+06	134.316	1383
HNRNPAB	0.244035	7	1.01549e+06	24.4035	1384
RPS15	0.653937	7	1.01406e+06	65.3937	1385
CORO7	0.231484	4	1.01381e+06	23.1484	1386
EIF4G3	0.817101	6	1.01316e+06	81.7101	1387
PTGDS	0.257424	7	1.01164e+06	25.7424	1388
ADAMTS1	1.10066	4	1.01128e+06	110.066	1389
LAMA4	0.851706	6	1.01063e+06	85.1706	1390
ATP2A3	1.53623	4	1.00922e+06	153.623	1391
SYNM	0.965259	7	1.00618e+06	96.5259	1392
LEMD2	0.436746	6	1.00497e+06	43.6746	1393
SCP2	1.10683	5	1.00391e+06	110.683	1394
IPO5	0.799533	6	1.00109e+06	79.9533	1395
PGM5	0.565354	7	999726	56.5354	1396
CPT1A	0.161188	6	996895	16.1188	1397
TBK1	0.573407	7	996476	57.3407	1398
DKK3	0.843123	5	996265	84.3123	1399
MARK3	1.00633	7	995690	100.633	1400
PCYT1B	0.993991	7	992832	99.3991	1401
CHTOP	0.705838	5	989831	70.5838	1402
GNPDA1	0.52084	6	984739	52.084	1403
ALDH3A2	0.522297	5	983556	52.2297	1404
SYK	0.816681	4	982458	81.6681	1405
FUCA1	1.22348	7	980651	122.348	1406
FAH	1.53928	6	980322	153.928	1407
GPX1	1.46072	6	980127	146.072	1408
BUB3	0.152117	5	978298	15.2117	1409
FABP5	0.653688	7	977219	65.3688	1410
FABP5P3	0.653688	7	977219	65.3688	1411
YWHAH	1.45851	7	977093	145.851	1412
PRMT1	0.677916	7	976658	67.7916	1413
GNE	0.439179	6	972164	43.9179	1414
BLVRA	1.70848	5	970494	170.848	1415
VAT1	0.874187	7	968832	87.4187	1416
MME	0.712231	6	966490	71.2231	1417
PPP1R13L	1.35899	5	964756	135.899	1418
PLS3	0.984404	7	964348	98.4404	1419
NOS1	0.454485	5	962078	45.4485	1420
GP5	1.13951	7	961888	113.951	1421
NPLOC4	0.487304	6	955450	48.7304	1422
MCM6	1.76496	6	952575	176.496	1423
PBLD	0.191898	4	949457	19.1898	1424
DDX1	0.812344	6	948983	81.2344	1425
TARDBP	1.15046	6	946805	115.046	1426
MDH1	1.00842	7	946660	100.842	1427
MCM7	0.673609	6	946498	67.3609	1428
DNAJB11	0.613055	4	943161	61.3055	1429
SEMG1	0.236553	5	939135	23.6553	1430
SDC4	0.791711	5	934686	79.1711	1431
TPI1	0.974772	7	933871	97.4772	1432
EIF4A1	0.588887	7	928767	58.8887	1433
DHRS7B	0.979551	7	926309	97.9551	1434
TUBA3C	2.04442	7	925644	204.442	1435
TUBA3D	2.04442	7	925644	204.442	1436
CHIT1	1.17829	7	924875	117.829	1437
ATP2A2	0.404193	5	923067	40.4193	1438
RAB5A	0.874914	4	920543	87.4914	1439
NAGA	2.16083	7	920413	216.083	1440
CLIC4	1.11068	5	919462	111.068	1441
IGKV6-21	0.430645	7	918871	43.0645	1442
IARS2	1.21836	6	916289	121.836	1443
UBA6	0.134988	4	914795	13.4988	1444
LAMP1	0.342792	4	914333	34.2792	1445
WDR75	0.207159	4	913048	20.7159	1446
IPO7	1.19555	4	911647	119.555	1447
GSTP1	0.907606	7	906640	90.7606	1448
MGLL	1.39838	7	904896	139.838	1449
SERPINB9	1.43591	4	900174	143.591	1450
HEXA	0.850962	5	899786	85.0962	1451
ITGB4	1.1254	6	899165	112.54	1452
UBE2I	0.516653	5	899083	51.6653	1453
ARHGAP1	0.73438	7	894809	73.438	1454
PDZK1IP1	0.51303	7	894625	51.303	1455
TP53BP1	1.01916	5	893856	101.916	1456
PDHB	0.667627	7	890286	66.7627	1457
ANXA5	0.788179	7	879755	78.8179	1458
DDX3X	0.533871	7	878894	53.3871	1459
SP100	0.579342	7	875725	57.9342	1460
PSMA4	0.937041	4	875036	93.7041	1461
DCD	1.39689	7	875013	139.689	1462
CKMT1A	1.03595	4	874676	103.595	1463
EPS8	1.18021	7	868636	118.021	1464
KLC1	0.690369	7	866563	69.0369	1465
UBXN7	0.636592	5	866397	63.6592	1466
PCOLCE	0.993548	7	864553	99.3548	1467
XRCC6	0.698042	6	862565	69.8042	1468
NEDD4L	0.95245	7	862333	95.245	1469
CLMN	0.657334	7	862316	65.7334	1470
HSPA4	0.520869	7	861398	52.0869	1471
GSTM1	0.15759	7	860791	15.759	1472
GSTM4	0.15759	7	860791	15.759	1473
SOD3	0.560256	7	859732	56.0256	1474
SPG11	0.23344	7	859210	23.344	1475
XPOT	0.985411	5	857932	98.5411	1476
GSTM2	0.163844	7	857799	16.3844	1477
NUP107	0.900359	4	857672	90.0359	1478
IGKV1D-16	0.244162	7	856526	24.4162	1479
CACNA2D2	0.239705	7	855586	23.9705	1480
LLGL1	0.459328	4	854964	45.9328	1481
CES1	1.0237	4	854504	102.37	1482
EIF5B	0.811938	6	851829	81.1938	1483
MICU1	0.261477	4	848331	26.1477	1484
TXNDC17	0.770666	4	847881	77.0666	1485
PPA1	1.263	7	847085	126.3	1486
PARVB	2.35367	7	845528	235.367	1487
AKR1C2	0.887825	4	845240	88.7825	1488
DNAJC13	0.344726	4	844548	34.4726	1489
MCM5	0.450081	4	842148	45.0081	1490
CBL	0.403469	6	840672	40.3469	1491
GIT1	0.350648	7	840374	35.0648	1492
DIAPH1	0.833639	7	839666	83.3639	1493
GPT	0.271403	4	837973	27.1403	1494
TXNRD1	1.0387	6	837846	103.87	1495
ASAH1	0.757919	7	837725	75.7919	1496
TUBA8	2.31562	7	835210	231.562	1497
COL3A1	1.44283	6	834822	144.283	1498
MMRN2	1.5756	7	833210	157.56	1499
INPP5K	0.75922	7	832996	75.922	1500
HSDL1	0.424571	6	830635	42.4571	1501
PACSIN2	0.489331	7	829664	48.9331	1502
SIRPA	0.382238	4	829490	38.2238	1503
CCS	0.754613	4	827627	75.4613	1504
NAT1	0.272876	4	826936	27.2876	1505
LYZ	0.825785	7	826268	82.5785	1506
HARS2	0.68471	6	825153	68.471	1507
ARHGEF10	1.10412	4	825131	110.412	1508
ARHGEF10L	1.10412	4	825131	110.412	1509
NUP93	0.615933	4	825014	61.5933	1510
ALDH3A1	0.715229	4	822377	71.5229	1511
HUWE1	0.506444	7	820945	50.6444	1512
ALDH1L1	0.507327	5	820924	50.7327	1513
NDUFB4	0.158571	6	819756	15.8571	1514
MYOF	0.991202	7	819111	99.1202	1515
HTRA1	0.856056	5	818336	85.6056	1516
DDX39A	1.18051	4	812602	118.051	1517
TRIM46	0.849099	4	810501	84.9099	1518
FCGR2A	0.651283	7	809026	65.1283	1519
VAV2	0.870464	4	808408	87.0464	1520
PREP	1.08349	4	807225	108.349	1521
TRAP1	1.10308	5	806228	110.308	1522
GET3	0.885987	6	805034	88.5987	1523
RAB3GAP2	0.620102	7	804989	62.0102	1524
PARP1	0.619628	4	804771	61.9628	1525
SRSF4	0.3123	5	804729	31.23	1526
BMS1	0.0786805	4	803569	7.86805	1527
ASL	0.389038	7	803401	38.9038	1528
MRPS15	0.637224	6	802675	63.7224	1529
ATP5PD	0.544886	6	802478	54.4886	1530
HSPB1	0.674302	7	802339	67.4302	1531
ITGA2B	0.431195	7	801142	43.1195	1532
HADHA	0.574885	7	800931	57.4885	1533
APRT	0.285885	5	799987	28.5885	1534
OCIAD2	0.105808	4	798701	10.5808	1535
PABPC4	0.756024	7	798361	75.6024	1536
ARFIP1	0.208482	5	797877	20.8482	1537
NARS1	0.941035	6	796620	94.1035	1538
IARS1	1.34925	7	796520	134.925	1539
CORO1A	0.579879	6	795835	57.9879	1540
SERPINI2	0.367494	5	791706	36.7494	1541
HSP90B2P	0.445101	7	791607	44.5101	1542
KRT75	0.333146	7	790571	33.3146	1543
HNF4A	0.23688	7	789640	23.688	1544
AIFM1	1.2582	5	788270	125.82	1545
ARG1	1.33521	7	787755	133.521	1546
YWHAQ	0.837363	7	785325	83.7363	1547
SPR	0.616497	4	785059	61.6497	1548
LSAMP	1.18558	6	784584	118.558	1549
SLC27A2	0.861072	4	784346	86.1072	1550
PHF6	0.683128	5	783516	68.3128	1551
PDCD6IP	1.20281	4	773779	120.281	1552
USP14	0.671743	7	772656	67.1743	1553
HIBCH	0.928553	4	771889	92.8553	1554
ANXA3	0.787625	4	771751	78.7625	1555
COPE	0.749518	4	771177	74.9518	1556
MMP3	0.842469	5	768505	84.2469	1557
TKFC	0.165568	4	767949	16.5568	1558
MEGF8	0.951074	5	766295	95.1074	1559
EPB41L5	0.0861018	4	766008	8.61018	1560
PIP4K2C	0.649165	5	760234	64.9165	1561
CEL	0.504849	7	759766	50.4849	1562
ESD	0.182041	7	759526	18.2041	1563
B2M	1.60137	7	755465	160.137	1564
LNPEP	0.305503	4	754986	30.5503	1565
DBNL	0.708372	5	751838	70.8372	1566
PA2G4	0.955748	5	751584	95.5748	1567
RUVBL1	0.792115	7	749908	79.2115	1568
PPIL4	0.454874	6	749426	45.4874	1569
AHCY	1.31211	7	748250	131.211	1570
HSP90AA2P	0.687951	5	747736	68.7951	1571
LIG1	0.696784	7	746850	69.6784	1572
DPY30	1.86289	6	746325	186.289	1573
ABR	0.629317	7	745929	62.9317	1574
CADM1	0.603249	5	744856	60.3249	1575
RAB9A	0.755971	4	743450	75.5971	1576
CRP	0.482246	7	742061	48.2246	1577
KRT78	0.686614	7	738955	68.6614	1578
SMYD5	0.25627	4	738756	25.627	1579
SF3B4	0.677189	7	738112	67.7189	1580
CCT3	0.618533	5	736122	61.8533	1581
PIGR	1.31409	7	733352	131.409	1582
GOT1	1.01376	7	731550	101.376	1583
UNC13D	0.407849	4	731537	40.7849	1584
IGHV1-69-2	0.245172	7	730919	24.5172	1585
SLC12A4	0.636366	4	729722	63.6366	1586
SPP1	0.68283	7	729386	68.283	1587
CCT2	1.29968	5	728680	129.968	1588
OPCML	0.537511	6	728020	53.7511	1589
EIF3L	0.468414	4	727728	46.8414	1590
DOCK8	0.725173	4	726637	72.5173	1591
ATAD3B	1.51681	4	725641	151.681	1592
CPA1	1.2875	7	725572	128.75	1593
ARHGAP17	0.772317	5	724347	77.2317	1594
PTAR1	0.14251	4	723867	14.251	1595
CASK	0.77116	7	720490	77.116	1596
SEC22B	0.695008	5	718956	69.5008	1597
USP9X	0.708421	5	717506	70.8421	1598
UGT1A7	1.11958	4	717378	111.958	1599
TLN2	0.940472	7	716229	94.0472	1600
ICAM2	0.278643	7	715927	27.8643	1601
KPNB1	0.573416	6	713362	57.3416	1602
CKAP4	1.13972	7	712667	113.972	1603
COL7A1	0.617948	5	712245	61.7948	1604
CKB	0.666941	5	712058	66.6941	1605
DPP7	0.852534	4	708736	85.2534	1606
DNM2	0.681877	6	708455	68.1877	1607
MIF	0.789396	5	708228	78.9396	1608
FLOT1	0.908796	7	703433	90.8796	1609
PYGM	0.548019	5	701727	54.8019	1610
PRPF8	0.789173	7	701515	78.9173	1611
FIP1L1	0.694468	4	700241	69.4468	1612
PARP4	0.645626	4	699637	64.5626	1613
COL4A2	1.28313	7	696883	128.313	1614
UPF1	0.676359	4	696230	67.6359	1615
IGKV1D-8	0.293111	7	695833	29.3111	1616
ACAD9	0.859745	4	693891	85.9745	1617
KRT84	0.399409	7	693858	39.9409	1618
RAB6A	0.492464	5	693277	49.2464	1619
HRNR	0.587136	7	692299	58.7136	1620
CALU	0.846796	4	688583	84.6796	1621
BAG3	0.489153	5	687373	48.9153	1622
CAPN2	0.845254	4	686691	84.5254	1623
EMILIN2	0.19991	4	684989	19.991	1624
TOMM20	0.812171	5	683224	81.2171	1625
HLA-A	0.62098	7	681888	62.098	1626
NUP205	0.703728	6	681433	70.3728	1627
ANXA2P2	1.4881	7	681395	148.81	1628
ASPSCR1	0.4319	7	680008	43.19	1629
SRSF6	0.632658	6	678732	63.2658	1630
PPP1CA	1.39443	4	677467	139.443	1631
SLC9A3R1	0.523881	6	675090	52.3881	1632
TPP2	0.617423	7	672463	61.7423	1633
RAB5C	1.10787	7	670742	110.787	1634
DNM1L	0.395997	5	670564	39.5997	1635
MMRN1	1.08451	5	670258	108.451	1636
IDH1	0.720717	7	669840	72.0717	1637
NDUFS3	1.03122	7	668738	103.122	1638
CPE	1.37627	5	668385	137.627	1639
MTTP	0.80076	7	667749	80.076	1640
PDE5A	0.100187	4	667520	10.0187	1641
DDX19A	0.860126	4	663066	86.0126	1642
DDX19B	0.860126	4	663066	86.0126	1643
AMDHD2	0.889643	4	662552	88.9643	1644
TPM1	1.43786	7	660403	143.786	1645
GOT2	1.07362	7	656806	107.362	1646
PLCB3	0.994418	5	656286	99.4418	1647
MTPAP	0.653919	4	654614	65.3919	1648
STARD10	0.403584	5	654408	40.3584	1649
ASMTL	0.399045	5	653245	39.9045	1650
EFL1	1.41483	4	653092	141.483	1651
IGLV2-23	1.13337	6	650660	113.337	1652
CCT8	1.52895	5	648392	152.895	1653
RNPS1	0.509408	6	648357	50.9408	1654
DNAJC9	1.05936	4	647759	105.936	1655
MYL12A	0.853399	7	644862	85.3399	1656
MYL12B	0.853399	7	644862	85.3399	1657
SRSF7	0.662885	7	641248	66.2885	1658
ECHS1	0.528241	4	640620	52.8241	1659
OXCT2	0.139373	4	638833	13.9373	1660
OSTF1	1.13456	4	637994	113.456	1661
GLRX3	0.207456	4	636791	20.7456	1662
PTPRD	0.655088	4	636313	65.5088	1663
RPL4	1.2234	4	635619	122.34	1664
ADARB1	0.32689	7	632381	32.689	1665
TMED10	0.588665	7	632187	58.8665	1666
OLFM1	0.336316	7	631237	33.6316	1667
ANKFY1	0.854629	6	631166	85.4629	1668
FARP1	0.174705	4	631062	17.4705	1669
GPD2	1.23899	4	630720	123.899	1670
MOGS	0.822246	7	630222	82.2246	1671
LTA4H	0.936928	7	629411	93.6928	1672
ROCK2	0.626316	6	629381	62.6316	1673
PGP	0.691155	5	625322	69.1155	1674
ARMC8	0.871778	5	624097	87.1778	1675
S100A11	0.572006	6	623475	57.2006	1676
NDUFA2	0.361792	5	621985	36.1792	1677
PYCARD	0.687944	5	621467	68.7944	1678
VSIG4	1.09367	4	621444	109.367	1679
MPRIP	1.39402	4	620926	139.402	1680
H2AC18	0.735825	7	620379	73.5825	1681
H2AC20	0.735825	7	620379	73.5825	1682
NRCAM	0.78947	5	618106	78.947	1683
SCIN	0.322802	7	616458	32.2802	1684
TGM2	1.10772	6	615637	110.772	1685
MRC1	0.815438	5	614879	81.5438	1686
PITHD1	0.530771	4	610280	53.0771	1687
MPI	0.377733	5	608422	37.7733	1688
SQSTM1	0.967127	5	607383	96.7127	1689
NRP1	1.86218	7	606842	186.218	1690
PSMA5	0.554922	7	606483	55.4922	1691
TRNT1	1.7675	7	605916	176.75	1692
DDX60	0.503748	5	604682	50.3748	1693
PABPC1	1.1798	7	604572	117.98	1694
ACE	0.800624	7	603832	80.0624	1695
MYL9	0.835574	7	603731	83.5574	1696
IRF2BP2	1.38276	4	601057	138.276	1697
CNP	0.98764	6	599169	98.764	1698
GOSR2	0.750194	6	598360	75.0194	1699
ACO2	1.0814	7	598343	108.14	1700
UBA3	0.59885	5	595734	59.885	1701
EPB41L2	0.346919	4	594691	34.6919	1702
OGDHL	0.897209	4	594481	89.7209	1703
S100A7	0.434699	7	594230	43.4699	1704
PLXNB2	1.24886	7	594123	124.886	1705
EIF4B	0.604388	4	593450	60.4388	1706
RBM12B	0.534488	4	592571	53.4488	1707
WDFY1	0.951306	5	590687	95.1306	1708
NASP	0.630202	4	590100	63.0202	1709
MAN1A1	0.945231	7	590019	94.5231	1710
IL1RAP	0.362339	7	589046	36.2339	1711
FAM83H	1.20759	4	587432	120.759	1712
NUP160	0.447103	7	585663	44.7103	1713
SYNCRIP	0.743436	6	584876	74.3436	1714
NDUFB11	0.317352	4	582506	31.7352	1715
PRKAR2A	0.809066	5	581736	80.9066	1716
ENOPH1	0.926199	4	580339	92.6199	1717
CDK11A	0.0924026	4	580096	9.24026	1718
CDK11B	0.0924026	4	580096	9.24026	1719
FAM3C	0.903844	4	579576	90.3844	1720
ACLY	0.668245	6	579568	66.8245	1721
UGP2	0.592619	6	578638	59.2619	1722
RAB14	0.742566	5	578491	74.2566	1723
DPYD	0.710695	4	578451	71.0695	1724
HSP90AB2P	1.04339	5	576738	104.339	1725
PTPN6	0.578661	5	572946	57.8661	1726
AOC3	0.850355	7	572937	85.0355	1727
ETFA	0.704763	5	572749	70.4763	1728
PDIA4	0.838802	6	571191	83.8802	1729
CAPZA1	0.760841	4	570050	76.0841	1730
UBA7	1.07304	7	566240	107.304	1731
ACTR1A	0.864654	4	565449	86.4654	1732
S100A12	1.49269	4	563650	149.269	1733
AFG3L2	0.42211	6	562810	42.211	1734
ATAD3A	1.70114	5	562161	170.114	1735
EPCAM	0.20527	7	561171	20.527	1736
PPP1R7	0.415391	6	560529	41.5391	1737
APLP2	1.1724	5	555443	117.24	1738
TRIM27	0.535143	5	555429	53.5143	1739
DDX23	0.221138	5	555125	22.1138	1740
ADPGK	0.832943	6	548424	83.2943	1741
SRSF3	0.41129	7	547635	41.129	1742
HSPA6	1.36352	5	546100	136.352	1743
AGO1	1.14054	4	545171	114.054	1744
DCTN4	0.808446	6	543258	80.8446	1745
SRI	0.601157	5	541167	60.1157	1746
IGFBP3	0.710396	7	538358	71.0396	1747
SORBS1	0.699518	7	538331	69.9518	1748
IGKV6D-21	0.297675	7	535415	29.7675	1749
FKBP4	0.105711	5	535281	10.5711	1750
HSBP1	0.200582	5	533602	20.0582	1751
IGKV6D-41	0.301848	7	533071	30.1848	1752
UFL1	0.5547	5	531861	55.47	1753
DDX3Y	0.815667	7	529623	81.5667	1754
CARD9	0.375593	5	529581	37.5593	1755
ATG2A	0.500568	6	526911	50.0568	1756
LNPK	1.43849	6	526728	143.849	1757
COL5A1	0.481738	5	526537	48.1738	1758
IPO9	0.685021	5	525971	68.5021	1759
ACOX3	0.472883	7	523997	47.2883	1760
TUBAL3	0.984763	4	520398	98.4763	1761
GOLGA2	0.962133	4	518807	96.2133	1762
HOMER3	0.840228	4	514348	84.0228	1763
EPS8L3	0.640309	4	514113	64.0309	1764
BLOC1S4	0.684342	5	511338	68.4342	1765
GBA	0.253494	4	509350	25.3494	1766
ASAP2	0.443616	5	509242	44.3616	1767
CPNE2	0.320615	4	508503	32.0615	1768
NDUFV2	0.585399	7	507651	58.5399	1769
CKM	0.6548	7	507213	65.48	1770
AZU1	0.545175	7	506823	54.5175	1771
IFI16	1.25336	4	505537	125.336	1772
NOL6	0.114001	4	501342	11.4001	1773
COPS7A	0.402135	4	500514	40.2135	1774
CHID1	0.296576	7	499703	29.6576	1775
CTSD	0.759368	7	497463	75.9368	1776
FARP2	1.05494	4	496455	105.494	1777
NOP58	0.852358	5	495708	85.2358	1778
YAP1	0.816802	5	493047	81.6802	1779
FLII	0.806291	7	492001	80.6291	1780
ELOVL5	0.226008	4	490133	22.6008	1781
TNPO1	1.0427	5	489780	104.27	1782
HSPA9	0.629482	4	485814	62.9482	1783
AKTIP	0.305051	5	482362	30.5051	1784
PPP3CA	0.820348	5	481641	82.0348	1785
EIF2B5	0.265653	4	480690	26.5653	1786
CLCA1	0.768081	7	479478	76.8081	1787
SMC3	1.0642	6	479304	106.42	1788
TMPRSS13	0.612162	4	479165	61.2162	1789
FAM172A	0.442852	5	477579	44.2852	1790
SHMT1	0.530138	6	476376	53.0138	1791
AFDN	0.610082	4	475394	61.0082	1792
DCAKD	0.18932	4	473797	18.932	1793
SFN	0.936821	7	472645	93.6821	1794
SVIL	0.698291	6	471830	69.8291	1795
NDRG1	0.755739	7	470170	75.5739	1796
EIF4G2	0.773666	6	469209	77.3666	1797
NMT1	1.07469	6	466123	107.469	1798
WDR61	0.413772	4	463083	41.3772	1799
PCCA	0.967228	4	463069	96.7228	1800
ALCAM	0.779803	6	461538	77.9803	1801
HSPA2	1.72344	7	461296	172.344	1802
DBI	1.04825	7	460939	104.825	1803
GNS	0.824487	6	460398	82.4487	1804
SORD	0.692542	4	459496	69.2542	1805
PAFAH1B3	0.269859	6	458477	26.9859	1806
H2AC11	1.0635	7	456776	106.35	1807
H2AC12	1.0635	7	456776	106.35	1808
H2AC14	1.0635	7	456776	106.35	1809
H2AC4	1.0635	7	456776	106.35	1810
H2AC6	1.0635	7	456776	106.35	1811
H2AC7	1.0635	7	456776	106.35	1812
H2AJ	1.0635	7	456776	106.35	1813
H2AW	1.0635	7	456776	106.35	1814
RFC1	0.350279	6	456735	35.0279	1815
DUT	0.30108	4	456649	30.108	1816
EIF4A3	0.597968	6	456335	59.7968	1817
ETHE1	0.492515	6	456128	49.2515	1818
RAB23	0.845597	4	454706	84.5597	1819
AP2B1	1.25263	7	451969	125.263	1820
GSTZ1	0.435205	5	451664	43.5205	1821
OGT	0.868613	7	450101	86.8613	1822
NAPA	0.904124	6	448944	90.4124	1823
PHGDH	0.135461	4	448839	13.5461	1824
DPP3	0.991092	7	448605	99.1092	1825
NBN	0.42093	6	447994	42.093	1826
HSP90AA4P	0.631951	5	445603	63.1951	1827
HNRNPH2	1.23525	7	445315	123.525	1828
OSBPL5	0.391592	4	444140	39.1592	1829
PTPRG	0.532474	7	443922	53.2474	1830
DHX30	0.199306	5	443779	19.9306	1831
DYNC1LI2	0.720406	4	443529	72.0406	1832
ARHGEF1	1.30589	6	442851	130.589	1833
ADD3	1.1191	7	442113	111.91	1834
H6PD	1.07806	5	441046	107.806	1835
DYNC1I2	0.242371	6	440729	24.2371	1836
MYDGF	0.734952	4	440560	73.4952	1837
PDXDC1	1.12536	7	439577	112.536	1838
GBE1	0.898746	4	437574	89.8746	1839
FBLN5	1.21332	7	437567	121.332	1840
MRPL50	1.09382	4	437551	109.382	1841
NAA30	0.617726	5	437492	61.7726	1842
NEO1	0.548572	7	436765	54.8572	1843
ZNF512B	1.0181	6	436681	101.81	1844
H2AX	0.990773	7	434627	99.0773	1845
DDX17	0.588765	7	433495	58.8765	1846
C2CD5	1.17823	6	433230	117.823	1847
DLG1	0.523592	6	431167	52.3592	1848
GDA	0.81239	5	430931	81.239	1849
PELP1	0.774269	4	429492	77.4269	1850
SF3B3	0.585983	6	429186	58.5983	1851
H2AC1	1.01167	7	428247	101.167	1852
SNIP1	0.424609	6	428072	42.4609	1853
HMOX2	1.36412	6	427664	136.412	1854
TPM3	1.58847	7	425555	158.847	1855
CA3	0.806018	6	424923	80.6018	1856
MAPK1	0.639445	5	423408	63.9445	1857
RPL9	0.780657	4	422968	78.0657	1858
EPB41L3	1.70007	5	417100	170.007	1859
SMARCC2	1.19235	5	416887	119.235	1860
FKBP2	0.414618	4	413742	41.4618	1861
CTBS	1.2559	7	412365	125.59	1862
ACAA1	0.805473	7	410116	80.5473	1863
GP1BA	0.173875	7	410025	17.3875	1864
GLO1	0.309687	4	408077	30.9687	1865
PIK3IP1	0.205639	5	407596	20.5639	1866
IGLV5-45	0.861062	7	407144	86.1062	1867
VTI1B	0.633047	4	407105	63.3047	1868
PTK2B	0.650904	4	406444	65.0904	1869
NDUFS1	0.416029	5	405449	41.6029	1870
STOML2	0.361239	4	405069	36.1239	1871
NAGLU	1.19182	7	404262	119.182	1872
PLBD2	0.290419	7	403825	29.0419	1873
GPNMB	0.608597	7	401526	60.8597	1874
GMEB1	0.40032	4	400858	40.032	1875
PGAM1	0.56312	7	400501	56.312	1876
PGRMC2	0.337972	5	399002	33.7972	1877
COPS2	0.0606797	4	395456	6.06797	1878
ORC2	0.0627758	5	394709	6.27758	1879
SF3A3	0.651868	5	394514	65.1868	1880
DENND4C	0.738454	4	392644	73.8454	1881
CAPZB	0.963581	7	392616	96.3581	1882
PSMD6	0.291939	5	391307	29.1939	1883
CD99L2	0.291912	4	390624	29.1912	1884
STOM	1.64952	6	389114	164.952	1885
GNAI2	0.601561	7	388718	60.1561	1886
CSNK2A3	0.237011	4	388212	23.7011	1887
SNRNP200	0.694075	4	388190	69.4075	1888
FSCN1	0.379623	7	387167	37.9623	1889
CPA3	0.789282	4	383026	78.9282	1890
RPS8	0.617964	5	380689	61.7964	1891
IMPDH2	0.530777	4	379019	53.0777	1892
PTPN1	0.781412	5	378911	78.1412	1893
HNRNPF	0.769852	6	378118	76.9852	1894
EMC1	0.343823	7	377019	34.3823	1895
MYLK	0.66636	5	376698	66.636	1896
RMDN3	0.97979	7	376340	97.979	1897
KPNA1	0.870685	5	376038	87.0685	1898
MERTK	0.693003	4	374508	69.3003	1899
BCAT2	0.286863	4	374227	28.6863	1900
REG3A	1.25107	4	373123	125.107	1901
ME1	0.17093	7	371137	17.093	1902
MAGOH	0.802759	5	369043	80.2759	1903
ABCB1	0.521064	4	368370	52.1064	1904
CARMIL1	0.257811	4	366982	25.7811	1905
RARRES2	0.639946	4	366874	63.9946	1906
POR	0.51474	5	366636	51.474	1907
VPS26B	0.449094	4	366254	44.9094	1908
PDXDC2P	0.076623	4	365729	7.6623	1909
CCT7	0.866733	5	365272	86.6733	1910
DPH5	0.271972	5	365118	27.1972	1911
APOOL	0.736751	5	363587	73.6751	1912
MVD	0.562136	6	363546	56.2136	1913
EIF3B	0.647469	7	362477	64.7469	1914
PLBD1	1.48962	5	362176	148.962	1915
PGAM4	0.577383	7	360946	57.7383	1916
CHGB	1.4111	6	360459	141.11	1917
BGN	0.325483	5	359817	32.5483	1918
KIAA1217	0.49373	5	357365	49.373	1919
HNRNPC	0.214203	4	357336	21.4203	1920
WBP2	0.26899	4	355708	26.899	1921
MYL6B	0.338323	5	355289	33.8323	1922
ITCH	0.283688	4	354931	28.3688	1923
LAMA3	0.124228	4	352930	12.4228	1924
RPL8	0.347437	5	352010	34.7437	1925
LAMB1	0.408629	6	350739	40.8629	1926
PHPT1	1.26052	4	350513	126.052	1927
CALM1	0.966642	7	349979	96.6642	1928
CALM2	0.966642	7	349979	96.6642	1929
CALM3	0.966642	7	349979	96.6642	1930
ZMPSTE24	0.646978	4	349778	64.6978	1931
GCN1	0.655658	7	349279	65.5658	1932
RPRD1B	0.575349	7	349244	57.5349	1933
FYCO1	1.10124	5	348541	110.124	1934
DOCK10	0.274547	7	347099	27.4547	1935
ARPC1B	0.76131	4	346690	76.131	1936
MGAT2	0.678967	4	346432	67.8967	1937
IGLV4-69	0.561625	4	345955	56.1625	1938
ABHD12	0.288491	6	343335	28.8491	1939
ASS1	0.750448	4	342079	75.0448	1940
SDHA	0.834295	6	341607	83.4295	1941
VNN1	0.922128	7	339953	92.2128	1942
RAD21	0.755958	4	338816	75.5958	1943
SSR1	0.544474	5	337375	54.4474	1944
TRAF2	0.161904	5	336038	16.1904	1945
LARP1	0.569937	4	336008	56.9937	1946
H2BC11	1.28878	7	331882	128.878	1947
H2BC17	1.28878	7	331882	128.878	1948
H2BC21	1.28878	7	331882	128.878	1949
H2BC3	1.28878	7	331882	128.878	1950
H2BU1	1.28878	7	331882	128.878	1951
TJP1	0.744157	4	331429	74.4157	1952
APBB1	0.200537	4	331222	20.0537	1953
UBA2	0.380896	5	331180	38.0896	1954
NME2	0.923489	6	331153	92.3489	1955
UCHL1	0.0655681	4	330200	6.55681	1956
PRPH	0.404215	7	329500	40.4215	1957
CASP1	0.646349	4	327533	64.6349	1958
NOP2	0.120264	4	324800	12.0264	1959
RNASEH2C	0.0914656	4	324247	9.14656	1960
ARFGAP3	0.404247	5	323762	40.4247	1961
AK1	0.462501	5	323647	46.2501	1962
PGC	0.343943	4	321882	34.3943	1963
HSDL2	0.319095	6	321854	31.9095	1964
EIF3M	0.829647	5	321827	82.9647	1965
SFPQ	0.789345	6	321731	78.9345	1966
DDX5	0.742084	4	320399	74.2084	1967
CYBB	0.228119	5	318822	22.8119	1968
GCLM	0.57191	4	315079	57.191	1969
GCLC	0.643858	7	314876	64.3858	1970
GPD1	0.832858	5	313723	83.2858	1971
FIBP	0.295028	4	312541	29.5028	1972
MTOR	1.24211	6	311525	124.211	1973
COL6A6	0.637097	4	310057	63.7097	1974
MAGOHB	1.07338	4	308243	107.338	1975
PRKACA	0.516607	7	307041	51.6607	1976
PRKACB	0.516607	7	307041	51.6607	1977
ALDH1L2	0.364847	4	306418	36.4847	1978
PCCB	0.806818	4	306373	80.6818	1979
LUC7L3	0.604016	6	305355	60.4016	1980
MOV10	0.559189	5	305019	55.9189	1981
PRRT3	0.440796	6	303675	44.0796	1982
RPRD1A	0.419556	7	301427	41.9556	1983
PHB	0.307196	4	299264	30.7196	1984
HNRNPCL1	0.116705	4	298934	11.6705	1985
HNRNPCL2	0.116705	4	298934	11.6705	1986
HNRNPCL3	0.116705	4	298934	11.6705	1987
HNRNPCL4	0.116705	4	298934	11.6705	1988
ACOT1	0.713213	4	296286	71.3213	1989
SPAG9	0.561722	7	293588	56.1722	1990
ATP6V1F	0.652473	5	292481	65.2473	1991
SAMD9L	0.434791	4	284884	43.4791	1992
TRIP11	1.36635	4	283793	136.635	1993
SNRPE	0.519636	4	283770	51.9636	1994
CETP	0.525118	6	283660	52.5118	1995
AKAP9	0.753661	7	283102	75.3661	1996
CDH13	0.986651	6	282541	98.6651	1997
DNAJC2	0.588601	5	282468	58.8601	1998
EFR3A	0.919446	4	282091	91.9446	1999
[truncated: 256 more rows]

## Sheet: 4.Protein_CV_STAVER
Gene_ID	count	cv	Abundance	Coefficient of Variation [%]	Abundance_Rank
GALE	4	0.218549	4186357591	21.8549	1
TLN1 KIAA1027 TLN	7	0.303542	2305100106	30.3542	2
NT5C3B NT5C3L	8	0.554816	2279432369	55.4816	3
TGM1 KTG	8	0.447908	1620527096	44.7908	4
IGHG1	8	0.140787	1193470025	14.0787	5
TALDO1 TAL TALDO TALDOR	7	0.155726	983643676	15.5726	6
TGM3	7	0.176864	4.16987e+08	17.6864	7
CLSTN1 CS1 KIAA0911	6	0.673771	2.7223e+08	67.3771	8
UQCC1 BZFB C20orf44 UQCC	8	0.23291	2.5487e+08	23.291	9
LAMC1 LAMB2	7	0.16293	2.52574e+08	16.293	10
ENO3	7	0.105368	2.39428e+08	10.5368	11
DTYMK CDC8 TMPK TYMK	7	0.0301075	2.19631e+08	3.01075	12
ALB GIG20 GIG42 PRO0903 PRO1708 PRO2044 PRO2619 PRO2675 UNQ696/PRO1341	8	0.263352	2.14108e+08	26.3352	13
IGHA1	8	0.184069	2.11937e+08	18.4069	14
ARID1A BAF250 BAF250A C1orf4 OSA1 SMARCF1	8	0.12477	2.01137e+08	12.477	15
LAP3 LAPEP PEPS	8	0.0876448	1.95156e+08	8.76448	16
PPM1A PPPM1A	7	0.0499495	182830496	4.99495	17
SEPHS2 SPS2	8	0.0899711	1.62688e+08	8.99711	18
LRCH2 KIAA1495	6	0.1911	1.61187e+08	19.11	19
IGLC2	6	0.725698	1.60455e+08	72.5698	20
ADGRL2 KIAA0786 LEC1 LPHH1 LPHN2	8	0.0942175	1.46278e+08	9.42175	21
PLOD1 LLH PLOD	4	0.352466	1.44992e+08	35.2466	22
ZFYVE19 ANCHR MPFYVE	7	0.677115	1.40465e+08	67.7115	23
NUBPL C14orf127	8	0.12759	1.36804e+08	12.759	24
HBG1 PRO2979	7	0.389102	1.31588e+08	38.9102	25
KRT16 KRT16A	8	0.765783	130868634	76.5783	26
GSPT1 ERF3A	5	0.282101	1.29321e+08	28.2101	27
CHRDL1 NRLN1	7	0.542209	128778680	54.2209	28
REC8 REC8L1	6	0.356952	1.26036e+08	35.6952	29
PRKAB1 AMPK	8	0.173771	1.2492e+08	17.3771	30
CHL1 CALL	8	0.337625	1.19886e+08	33.7625	31
IGHM	8	0.091505	1.08232e+08	9.1505	32
DSG1 CDHF4	7	0.3416	1.07187e+08	34.16	33
ADCY5	4	0.442872	105553944	44.2872	34
RASA4B	8	0.132939	1.02878e+08	13.2939	35
FHIT	8	0.121286	102816248	12.1286	36
MIA3 KIAA0268 TANGO UNQ6077/PRO20088	7	0.136248	100137038	13.6248	37
HDHD3 C9orf158	7	0.134281	99433652	13.4281	38
GSTP1 FAEES3 GST3	4	0.211894	9.60724e+07	21.1894	39
EPB42 E42P	8	0.154979	9.53652e+07	15.4979	40
PPL KIAA0568	8	0.0105987	92228600	1.05987	41
ZNF326 ZIRD	6	0.193743	9.19647e+07	19.3743	42
CAPRIN1 GPIAP1 GPIP137 M11S1 RNG105	4	0.508284	9.02848e+07	50.8284	43
PTGFRN CD9P1 EWIF FPRP KIAA1436	6	0.234711	8.69026e+07	23.4711	44
SERPINA1 AAT PI PRO0684 PRO2209	8	0.321563	8.6195e+07	32.1563	45
HNRNPA1 HNRPA1	7	0.0174543	8.50841e+07	1.74543	46
HBB	8	0.146728	8.4391e+07	14.6728	47
TUBB8B	7	0.463308	8.37465e+07	46.3308	48
RAB10	7	0.182672	8.328e+07	18.2672	49
IGHV3-53	4	0.390431	8.07115e+07	39.0431	50
TMOD3	4	0.388549	8.00025e+07	38.8549	51
TMSB4X TB4X THYB4 TMSB4	4	0.383978	77976302	38.3978	52
F2	5	0.30996	7.77984e+07	30.996	53
IGKC	7	0.20324	73145199	20.324	54
RANBP9 RANBPM	8	0.159458	7.24097e+07	15.9458	55
KIF21A KIAA1708 KIF2	4	0.180003	7.14314e+07	18.0003	56
ZNHIT2 C11orf5	4	0.732706	7.06295e+07	73.2706	57
CBR3 SDR21C2	8	0.137847	70209319	13.7847	58
TTR PALB	8	0.326106	6.9334e+07	32.6106	59
IGKV3D-11	7	0.149881	6.90943e+07	14.9881	60
TMEM256 C17orf61	8	0.229276	6.84096e+07	22.9276	61
EIF2AK3 PEK PERK	7	0.0138575	6.76796e+07	1.38575	62
SGTA SGT SGT1	8	0.231742	6.73973e+07	23.1742	63
GGCT C7orf24 CRF21	6	0.276498	6.72578e+07	27.6498	64
TFAM TCF6 TCF6L2	8	0.513152	6.55149e+07	51.3152	65
MRPS18A	8	0.206816	6.41094e+07	20.6816	66
IGKV2-28	8	0.107014	6.40022e+07	10.7014	67
MYH8	5	0.254851	6.29288e+07	25.4851	68
ENO1 ENO1L1 MBPB1 MPB1	7	0.411062	6.15739e+07	41.1062	69
APOC3	8	0.143295	5.99074e+07	14.3295	70
THOC6 WDR58 PSEC0006	7	0.208891	5.88832e+07	20.8891	71
CRISP2 GAPDL5 TPX1	7	0.276859	5.79346e+07	27.6859	72
CRABP2	8	0.0767206	5.78567e+07	7.67206	73
ANO10 TMEM16K	4	0.525581	5.55383e+07	52.5581	74
REG3A HIP PAP PAP1	4	0.344335	5.53289e+07	34.4335	75
IGHG4	8	0.357544	5.37639e+07	35.7544	76
HLA-DPB1 HLA-DP1B	4	0.193145	5.29988e+07	19.3145	77
AKAP12 AKAP250	8	0.174674	5.27806e+07	17.4674	78
IGHV3-15	8	0.0409757	5.08678e+07	4.09757	79
FUBP1	7	0.194295	5.05741e+07	19.4295	80
NID2	6	0.962625	5.01473e+07	96.2625	81
EHD2 PAST2	8	0.505309	4.95427e+07	50.5309	82
PDCD5 TFAR19	7	0.525733	4.94958e+07	52.5733	83
MYO15B KIAA1783 MYO15BP	8	0.348169	4.86561e+07	34.8169	84
ACTR1B CTRN2	7	0.0596314	4.81928e+07	5.96314	85
HERC4 KIAA1593	6	0.629209	4.63099e+07	62.9209	86
YWHAB	8	0.768086	46003065	76.8086	87
ORM1 AGP1	8	0.147605	4.57173e+07	14.7605	88
SLC2A4 GLUT4	5	0.529168	4.53073e+07	52.9168	89
VASN SLITL2 UNQ314/PRO357/PRO1282	8	0.404909	4.47447e+07	40.4909	90
EPHB3 ETK2 HEK2 TYRO6	8	0.327287	4.36137e+07	32.7287	91
TTN	8	0.215064	4.35199e+07	21.5064	92
LGMN PRSC1	4	0.207208	4.29574e+07	20.7208	93
UBE2K HIP2 LIG	6	0.644646	4.24128e+07	64.4646	94
MAN2A1 MANA2	8	0.200997	4.21046e+07	20.0997	95
DNMBP ARHGEF36 KIAA1010 TUBA	8	0.0629141	4.20334e+07	6.29141	96
TECR GPSN2 SC2	7	0.154099	4.13861e+07	15.4099	97
FKBP4 FKBP52	8	0.399212	4.09479e+07	39.9212	98
UGGT2 UGCGL2 UGT2	6	0.374479	4.05429e+07	37.4479	99
SNX27 KIAA0488 My014	8	0.0659202	3.97947e+07	6.59202	100
IGLL5	8	0.209037	3.93127e+07	20.9037	101
PGK1 PGKA MIG10 OK/SW-cl.110	8	0.503276	3.90563e+07	50.3276	102
CEP250 CEP2 CNAP1	8	0.190637	38759484	19.0637	103
KNG1 BDK KNG	8	0.123677	3.86127e+07	12.3677	104
IGKV3D-20	8	0.186268	3.83054e+07	18.6268	105
MRPS18B C6orf14 HSPC183 PTD017	8	0.208007	3.8245e+07	20.8007	106
RBCK1 C20orf18 RNF54 UBCE7IP3 XAP3 XAP4	8	0.0289266	3.81906e+07	2.89266	107
ST13 AAG2 FAM10A1 HIP SNC6	8	0.622081	3.80898e+07	62.2081	108
RPL35A GIG33	5	0.498604	3.7838e+07	49.8604	109
RBBP5 RBQ3	8	0.170359	37777900	17.0359	110
CLCN6 KIAA0046	6	0.665381	3.74211e+07	66.5381	111
RPS23	5	0.214366	3.73379e+07	21.4366	112
AHCYL1 DCAL IRBIT XPVKONA	7	0.268851	3.70255e+07	26.8851	113
GGT3P GGT3	8	0.173143	3.68597e+07	17.3143	114
SORCS3 KIAA1059	7	0.174252	3.65526e+07	17.4252	115
HCLS1 HS1	6	0.409372	3.6162e+07	40.9372	116
APOA2	8	0.135786	3.56735e+07	13.5786	117
ADAM17 CSVP TACE	4	0.367526	3.44998e+07	36.7526	118
KIT SCFR	7	0.148003	3.44246e+07	14.8003	119
CUBN IFCR	7	0.568711	3.43948e+07	56.8711	120
MT-ND2 MTND2 NADH2 ND2	6	0.197875	3.39372e+07	19.7875	121
CHI3L2	5	0.22188	3.37519e+07	22.188	122
MED23 ARC130 CRSP3 DRIP130 KIAA1216 SUR2	7	0.181684	3.36707e+07	18.1684	123
NXF1 TAP	7	0.343273	3.29962e+07	34.3273	124
SERPINC1 AT3 PRO0309	8	0.199183	3.23897e+07	19.9183	125
DDI2	5	0.847808	3.20125e+07	84.7808	126
MEAK7 KIAA1609 TLDC1	7	0.108606	3.20116e+07	10.8606	127
IDH3G	8	0.213444	3.19011e+07	21.3444	128
IGF2BP1 CRDBP VICKZ1 ZBP1	8	0.24176	3.11405e+07	24.176	129
VARS1 G7A VARS VARS2	8	0.09531	3.08662e+07	9.531	130
USP5 ISOT	8	0.18339	3.07153e+07	18.339	131
CLU APOJ CLI KUB1 AAG4	8	0.253287	3.06661e+07	25.3287	132
PCMTD1	8	0.235437	3.05736e+07	23.5437	133
DIP2B KIAA1463	8	0.120382	3.04083e+07	12.0382	134
MED30 THRAP6 TRAP25	6	0.366423	3.0152e+07	36.6423	135
PTPRA PTPA PTPRL2	7	0.481572	3.009e+07	48.1572	136
IGKV3-20	8	0.245434	2.98051e+07	24.5434	137
PARK7	7	0.359414	2.90034e+07	35.9414	138
LGALS7 PIG1; LGALS7B	8	0.0776974	28905900	7.76974	139
MINPP1 MIPP UNQ900/PRO1917	7	0.166374	2.8759e+07	16.6374	140
SUCLG2	8	0.587063	2.85931e+07	58.7063	141
RMC1 C18orf8 MIC1 WDR98	7	0.109299	2.82507e+07	10.9299	142
IGHV3-74	8	0.229349	2.82212e+07	22.9349	143
HDGF HMG1L2	5	0.416055	2.80156e+07	41.6055	144
IGHG2	7	0.133673	2.79841e+07	13.3673	145
RCL1 RNAC RPC2 RPCL1 RTC2 HSPC338	8	0.162299	2.79137e+07	16.2299	146
DKK3 REIC UNQ258/PRO295	5	0.445007	2.78568e+07	44.5007	147
RDX	6	0.184875	2.77555e+07	18.4875	148
JCHAIN IGCJ IGJ	8	0.546738	2.74885e+07	54.6738	149
COG7 UNQ3082/PRO10013	7	0.165493	2.7406e+07	16.5493	150
APP A4 AD1	7	0.233352	2.70067e+07	23.3352	151
ADH1B ADH2	7	0.13412	2.69933e+07	13.412	152
EPSTI1	8	0.0886316	26783075	8.86316	153
DTX3L BBAP	7	0.0659986	2.63536e+07	6.59986	154
SERPINI1 PI12	4	1.00768	2.60588e+07	100.768	155
IGKV2D-24	8	0.196964	2.59681e+07	19.6964	156
INPPL1 SHIP2	4	0.197595	2.59103e+07	19.7595	157
VPS13C KIAA1421	8	0.215289	2.5572e+07	21.5289	158
ANKS1A ANKS1 KIAA0229 ODIN	6	0.767306	2.55074e+07	76.7306	159
TRA2B SFRS10	8	0.263597	2.5428e+07	26.3597	160
CAPN5 NCL3	8	0.318249	2.53622e+07	31.8249	161
STXBP5 LLGL3	8	0.29625	25168325	29.625	162
FASN FAS	4	0.590515	2.48408e+07	59.0515	163
APOC2 APC2	8	0.276313	2.47373e+07	27.6313	164
RBM12 KIAA0765 HRIHFB2091	4	0.268873	2.46999e+07	26.8873	165
MAP1A MAP1L	7	0.152633	2.46733e+07	15.2633	166
FGG PRO2061	8	0.426681	2.43861e+07	42.6681	167
POSTN OSF2	8	0.234774	2.40015e+07	23.4774	168
MLPH SLAC2A	7	0.0157587	2.39518e+07	1.57587	169
SMPDL3A ASML3A	5	0.758145	2.38605e+07	75.8145	170
PTPRF LAR	7	0.548121	2.37474e+07	54.8121	171
TIMM44 MIMT44 TIM44	8	0.163825	2.34905e+07	16.3825	172
RPLP0	5	0.582974	23445880	58.2974	173
KRT7 SCL	4	0.30446	2.32823e+07	30.446	174
RAP1GAP KIAA0474 RAP1GA1	7	0.152847	2.3182e+07	15.2847	175
SMARCA2 BAF190B BRM SNF2A SNF2L2	7	0.152899	2.31335e+07	15.2899	176
GTF2I BAP135 WBSCR6	5	0.38738	2.31167e+07	38.738	177
ORC3 LATHEO ORC3L	8	0.0397709	2.29843e+07	3.97709	178
OXCT1 OXCT SCOT	5	0.312979	22930900	31.2979	179
TAGLN SM22 WS3-10	7	0.16278	2.28322e+07	16.278	180
MRPS31 IMOGN38	8	0.124711	2.27318e+07	12.4711	181
TCF20 KIAA0292 SPBP	6	0.235973	2.26457e+07	23.5973	182
MSL1 MSL1L1	8	0.300419	2.25462e+07	30.0419	183
IGKV4-1	6	0.59322	2.2491e+07	59.322	184
DYNLL2 DLC2	5	0.252991	2.23811e+07	25.2991	185
GK	8	0.0874078	2.22107e+07	8.74078	186
HES7 BHLHB37	8	0.45579	2.21685e+07	45.579	187
RBM5 H37 LUCA15	7	0.278077	2.20884e+07	27.8077	188
AMBP HCP ITIL	8	0.453426	2.20261e+07	45.3426	189
RASA3	4	0.20931	2.19543e+07	20.931	190
LTF GIG12 LF	8	0.294822	2.18501e+07	29.4822	191
EEF1D EF1D	7	0.211316	2.15482e+07	21.1316	192
RAB4A RAB4	8	0.104251	2.15267e+07	10.4251	193
IL13RA1 IL13R IL13RA	6	0.268358	2.1269e+07	26.8358	194
HDHD5 CECR5	6	0.672349	2.10317e+07	67.2349	195
ANXA11 ANX11	5	0.836884	2.08982e+07	83.6884	196
SLC35B2 PAPST1 PSEC0149	5	0.418994	2.07724e+07	41.8994	197
BUB1B BUBR1 MAD3L SSK1	8	0.345878	2.04665e+07	34.5878	198
CD5L API6 UNQ203/PRO229	8	0.143634	2.03016e+07	14.3634	199
SIRPB1	7	0.146054	2.02446e+07	14.6054	200
MYH14 KIAA2034 FP17425	7	0.175353	2.02328e+07	17.5353	201
NECAP2	4	0.20852	2.01682e+07	20.852	202
IGLV1-47	8	0.275666	2.01462e+07	27.5666	203
SERPINB12	8	0.179113	2.00223e+07	17.9113	204
TPI1 TPI	4	0.271809	1.9763e+07	27.1809	205
PSMD7 MOV34L	8	0.350117	1.9728e+07	35.0117	206
INTS4 MSTP093	5	0.49208	1.96194e+07	49.208	207
AKR1B1 ALDR1 ALR2	8	0.186031	1.92883e+07	18.6031	208
	8	0.204441	1.92679e+07	20.4441	209
UBE3C KIAA0010 KIAA10	6	0.385635	18944450	38.5635	210
LRBA BGL CDC4L LBA	7	0.299111	1.88022e+07	29.9111	211
VAPB UNQ484/PRO983	6	0.73997	1.87626e+07	73.997	212
METTL18 ASTP2 C1orf156	8	0.282074	1.86675e+07	28.2074	213
CCT5 CCTE KIAA0098	5	0.746504	1.85538e+07	74.6504	214
CDC37 CDC37A	8	0.375495	1.84327e+07	37.5495	215
MARK2 EMK1	8	0.212423	1.82776e+07	21.2423	216
C8G	8	0.222605	1.75776e+07	22.2605	217
NUCB2 NEFA	7	0.158115	1.72214e+07	15.8115	218
HARS1 HARS HRS	8	0.123425	1.71602e+07	12.3425	219
SYNE1 C6orf98 KIAA0796 KIAA1262 KIAA1756 MYNE1	7	0.630309	1.67782e+07	63.0309	220
IGKV1-5	8	0.637892	1.67538e+07	63.7892	221
TRIM27 RFP RNF76	4	0.319474	1.67087e+07	31.9474	222
TRIM28 KAP1 RNF96 TIF1B	8	0.148379	1.6553e+07	14.8379	223
TTC7B TTC7L1	8	0.129518	1.63752e+07	12.9518	224
IGHV3-7	8	0.30239	1.63134e+07	30.239	225
NAGLU UFHSD1	8	0.457548	1.62548e+07	45.7548	226
	8	0.112717	1.62543e+07	11.2717	227
CBX5 HP1A	8	0.125293	1.61613e+07	12.5293	228
PLG	7	0.0751757	1.61303e+07	7.51757	229
SHPK CARKL	4	0.782067	1.6084e+07	78.2067	230
PPP2R1A	8	0.0993668	1.5971e+07	9.93668	231
ALDH1A2 RALDH2	6	0.241856	1.59491e+07	24.1856	232
MTMR6	8	0.0889063	15835200	8.89063	233
ABCA8 KIAA0822	7	0.343212	1.57228e+07	34.3212	234
ME2	8	0.147418	1.57195e+07	14.7418	235
HBA1; HBA2	8	0.414041	1.54585e+07	41.4041	236
ELN	6	0.407304	1.54013e+07	40.7304	237
EIF2B2 EIF2BB	7	0.16069	1.51715e+07	16.069	238
CRYZL1 4P11	7	0.271785	1.50152e+07	27.1785	239
APOD	8	0.135155	1.4891e+07	13.5155	240
SUOX	8	0.0849037	1.48405e+07	8.49037	241
SUPT16H FACT140 FACTP140	6	0.449606	1.47431e+07	44.9606	242
MRPL2 CGI-22	8	0.108443	1.45969e+07	10.8443	243
SRPK2	7	0.420729	1.41433e+07	42.0729	244
NES Nbla00170	4	0.448263	1.39904e+07	44.8263	245
RTCA RPC RPC1 RTC1 RTCD1	8	0.156756	1.39197e+07	15.6756	246
IGLV7-46	8	0.536131	1.39107e+07	53.6131	247
PRRC1	8	0.14362	1.37941e+07	14.362	248
PSME1 IFI5111	8	0.36437	1.37128e+07	36.437	249
PRSS1 TRP1 TRY1 TRYP1	8	0.536182	1.37099e+07	53.6182	250
ACTR3 ARP3	7	0.192303	1.36386e+07	19.2303	251
NIF3L1 ALS2CR1 MDS015 My018	6	0.701719	1.36377e+07	70.1719	252
AFDN AF6 MLLT4	8	0.0719283	13385500	7.19283	253
ARPC1A SOP2L	8	0.107422	1.33811e+07	10.7422	254
PTPRS	8	0.225368	1.33521e+07	22.5368	255
RALGAPA2 C20orf74 KIAA1272	8	0.152596	1.33327e+07	15.2596	256
DDX58	7	0.0789182	1.32164e+07	7.89182	257
TTC37 KIAA0372	8	0.308003	1.32071e+07	30.8003	258
ILF3 DRBF MPHOSPH4 NF90	7	0.71967	1.32035e+07	71.967	259
FGA	7	0.486616	1.31837e+07	48.6616	260
NCLN	5	0.747297	13164740	74.7297	261
ENPEP	4	0.231398	1.31139e+07	23.1398	262
CADM4 IGSF4C NECL4 TSLL2	4	0.3739	1.30707e+07	37.39	263
GOLGA5 RETII RFG5 PIG31	8	0.146598	1.29723e+07	14.6598	264
TKT	7	0.26296	1.29131e+07	26.296	265
KRT18 CYK18 PIG46	7	0.464027	1.28795e+07	46.4027	266
FBXO38 SP329	8	0.009281	1.28075e+07	0.928099	267
A2M CPAMD5 FWP007	7	0.188409	1.27922e+07	18.8409	268
RIPOR1 FAM65A KIAA1930	8	0.157954	1.26789e+07	15.7954	269
EEF2 EF2	8	0.368542	1.26375e+07	36.8542	270
PFKM PFKX	6	0.682879	1.25804e+07	68.2879	271
WDR7 KIAA0541 TRAG	8	0.321091	1.23779e+07	32.1091	272
G6PD	8	0.105211	1.23496e+07	10.5211	273
ZNF185	8	0.158971	1.21708e+07	15.8971	274
CDC5L KIAA0432 PCDC5RP	8	0.562405	1.20428e+07	56.2405	275
TMPPE	8	0.0884313	1.19316e+07	8.84313	276
DYSF FER1L1	6	0.642723	1.19038e+07	64.2723	277
CUL4A	8	0.159408	1.18367e+07	15.9408	278
SYTL1 SLP1 SB146	8	0.241157	1.17942e+07	24.1157	279
IGHV5-51	8	0.385198	1.17323e+07	38.5198	280
MRPS27 KIAA0264	8	0.164937	11684422	16.4937	281
EPS8L2 EPS8R2 PP13181	6	0.191377	1.16108e+07	19.1377	282
MYH7B KIAA1512	8	0.16544	1.15985e+07	16.544	283
RTN4 KIAA0886 NOGO My043 SP1507	4	0.788281	1.15951e+07	78.8281	284
IGHV6-1	7	0.913929	1.15359e+07	91.3929	285
MTAP MSAP	8	0.561452	1.15288e+07	56.1452	286
H2AC4 H2AFM HIST1H2AB; H2AC8 H2AFA HIST1H2AE	7	0.14973	1.15255e+07	14.973	287
TBC1D13	8	0.0191831	1.14398e+07	1.91831	288
SCRIB CRIB1 KIAA0147 LAP4 SCRB1 VARTUL	7	0.305156	1.14205e+07	30.5156	289
AHSG FETUA PRO2743	8	0.287312	1.14032e+07	28.7312	290
ADSL AMPS	5	0.339483	1.13918e+07	33.9483	291
SF3B1 SAP155	6	0.285345	1.1376e+07	28.5345	292
LRG1 LRG	8	0.156238	1.13405e+07	15.6238	293
IGKV1D-33	8	0.576638	1.12761e+07	57.6638	294
GSTO1 GSTTLP28	8	0.522977	1.12477e+07	52.2977	295
IGHV3-21	8	0.361821	1.12372e+07	36.1821	296
BCL2L13 MIL1 CD003	4	0.816944	11138540	81.6944	297
ANPEP APN CD13 PEPN	7	0.679845	1.11325e+07	67.9845	298
HBZ HBZ2	7	0.377204	1.10579e+07	37.7204	299
PRPF19 NMP200 PRP19 SNEV	5	0.205006	1.10571e+07	20.5006	300
SYTL2 KIAA1597 SGA72M SLP2 SLP2A	8	0.316636	1.09136e+07	31.6636	301
ERAP1 APPILS ARTS1 KIAA0525 UNQ584/PRO1154	8	0.121255	1.09014e+07	12.1255	302
ANXA2 ANX2 ANX2L4 CAL1H LPC2D	8	0.271653	1.0841e+07	27.1653	303
TRIP12 KIAA0045 ULF	7	0.492464	1.08288e+07	49.2464	304
THUMPD1	8	0.596893	1.07166e+07	59.6893	305
GALNT7	5	0.56707	1.06269e+07	56.707	306
CLEC14A C14orf27 EGFR5 UNQ236/PRO269	7	0.507997	10564394	50.7997	307
ACTR1A CTRN1	4	0.692677	1.04429e+07	69.2677	308
COL11A2	6	0.3584	1.04402e+07	35.84	309
TPM3	4	0.459029	1.03996e+07	45.9029	310
PEBP1 PBP PEBP	5	0.505196	1.03907e+07	50.5196	311
ATP5PO ATP5O ATPO	6	0.31091	1.03293e+07	31.091	312
NFKB1	7	0.113616	1.02678e+07	11.3616	313
VPS4A VPS4	6	0.297701	1.01907e+07	29.7701	314
FLNA FLN FLN1	8	0.633319	1.01782e+07	63.3319	315
LAMC2 LAMB2T LAMNB2	5	0.317947	1.00378e+07	31.7947	316
IGHV3-49	7	0.158535	9.99237e+06	15.8535	317
DOCK7 KIAA1771	5	0.867391	9.98973e+06	86.7391	318
BMPR1A ACVRLK3 ALK3	8	0.374049	9.92578e+06	37.4049	319
BRD4 HUNK1	8	0.35076	9.86869e+06	35.076	320
FERMT3 KIND3 MIG2B URP2	8	0.622198	9.74517e+06	62.2198	321
CUL2	7	0.0147856	9.67631e+06	1.47856	322
SEL1L TSA305 UNQ128/PRO1063	6	0.182282	9.4993e+06	18.2282	323
EPHB2 DRT EPHT3 EPTH3 ERK HEK5 TYRO5	5	0.841104	9.45537e+06	84.1104	324
DDX31	8	0.00151936	9405705	0.151936	325
AFM ALB2 ALBA	8	0.187619	9.40221e+06	18.7619	326
TIE1 TIE	4	0.323756	9347805	32.3756	327
IGFBP2 BP2 IBP2	7	0.125199	9.31934e+06	12.5199	328
FAT2 CDHF8 KIAA0811 MEGF1	7	0.337098	9.29086e+06	33.7098	329
STIM1 GOK	8	0.275379	9.27958e+06	27.5379	330
CFB BF BFD	8	0.191303	9.15489e+06	19.1303	331
RBP4 PRO2222	8	0.199909	9.05791e+06	19.9909	332
SEPTIN2 DIFF6 KIAA0158 NEDD5 SEPT2	8	0.156609	9.05033e+06	15.6609	333
MXRA5	5	0.427299	9.02055e+06	42.7299	334
NAP1L1 NRP	7	0.218588	8.97512e+06	21.8588	335
SCG2 CHGC	6	0.591802	8.95908e+06	59.1802	336
RABL3	8	0.250721	8.88966e+06	25.0721	337
NUMA1 NMP22 NUMA	6	0.203781	8.79593e+06	20.3781	338
PON2	5	0.348826	8.7828e+06	34.8826	339
HBE1 HBE	8	0.600391	8.7277e+06	60.0391	340
A1BG	8	0.22853	8.69525e+06	22.853	341
SLC4A1 AE1 DI EPB3	7	0.120747	8.65481e+06	12.0747	342
LPCAT4 AGPAT7 AYTL3 LPEAT2	7	0.207972	8.61791e+06	20.7972	343
PPP1R9B PPP1R6	8	0.229834	8.60325e+06	22.9834	344
TNXB HXBL TNX TNXB1 TNXB2 XB	8	0.0389862	8.5346e+06	3.89862	345
IGHV5-10-1	8	0.413296	8.52342e+06	41.3296	346
IL6ST	8	0.142255	8.5082e+06	14.2255	347
PITPNB	5	0.541895	8.43684e+06	54.1895	348
RNASE3 ECP RNS3	7	0.297337	8.35108e+06	29.7337	349
CSN2	5	0.70736	8.35086e+06	70.736	350
C1R	8	0.303994	8.34965e+06	30.3994	351
TIMD4 TIM4	6	0.77282	8336355	77.282	352
NOL11 L14	4	0.279939	8.32343e+06	27.9939	353
LIMCH1 KIAA1102	7	0.510396	8.31392e+06	51.0396	354
PPFIBP1 KIAA1230	8	0.0765453	8.3074e+06	7.65453	355
IGHV4-61	8	0.106836	8.21107e+06	10.6836	356
CALB2 CAB29	4	0.41149	8135140	41.149	357
IGLV3-16	8	0.526066	8.0716e+06	52.6066	358
SPARCL1	4	0.264854	8.01306e+06	26.4854	359
LRP1 A2MR APR	5	0.387146	8.00087e+06	38.7146	360
IARS1 IARS	4	0.39458	7.98387e+06	39.458	361
PPP6R3 C11orf23 KIAA1558 PP6R3 SAPL SAPS3	8	0.240464	7.98093e+06	24.0464	362
ITGA2 CD49B	8	0.266176	7.87577e+06	26.6176	363
MTREX DOB1 KIAA0052 MTR4 SKIV2L2	5	0.312374	7.86924e+06	31.2374	364
SERPINB10 PI10	7	0.3026	7.86049e+06	30.26	365
ELOC TCEB1	7	0.459398	7.76208e+06	45.9398	366
ARL6IP5 DERP11 JWA PRA2 PRAF3 HSPC127	6	0.341713	7.75626e+06	34.1713	367
FCGR3B CD16B FCG3 FCGR3 IGFR3	8	0.278125	7.74696e+06	27.8125	368
ATPAF1 ATP11	4	0.267429	7.7449e+06	26.7429	369
CYBA	5	0.469141	7.69778e+06	46.9141	370
APOB	8	0.238512	7.65799e+06	23.8512	371
SF3B2 SAP145	5	0.524192	7.61519e+06	52.4192	372
C1S	8	0.23341	7.60928e+06	23.341	373
LRPPRC LRP130	4	0.47548	7.60426e+06	47.548	374
LGALS4	7	0.277801	7.59305e+06	27.7801	375
CCDC88B BRLZ	5	0.230254	7.5858e+06	23.0254	376
CAPS	6	0.635931	7.55113e+06	63.5931	377
CD109 CPAMD7	8	0.359593	7.52784e+06	35.9593	378
NSF	8	0.0681867	7.51055e+06	6.81867	379
ACSL4 ACS4 FACL4 LACS4	5	0.94537	7.37661e+06	94.537	380
PRDX3 AOP1	8	0.00705484	7.34336e+06	0.705484	381
IGKV1-37	8	0.531178	7.30387e+06	53.1178	382
IGHV3-30	8	0.450556	7.15465e+06	45.0556	383
TXNRD2 KIAA1652 TRXR2	4	0.349379	7126275	34.9379	384
AP2M1 CLAPM1 KIAA0109	7	0.559314	7.10622e+06	55.9314	385
ABHD11 WBSCR21 PP1226	8	0.146971	7106150	14.6971	386
CMBL	8	0.172137	7.09576e+06	17.2137	387
KRT5	7	0.637378	7.08334e+06	63.7378	388
GRIA2 GLUR2	4	0.304507	7059316	30.4507	389
COG2 LDLC	5	0.344417	7.05214e+06	34.4417	390
SEMG1 SEMG	5	0.420117	7.03943e+06	42.0117	391
APOL1 APOL	8	0.331098	6.95147e+06	33.1098	392
NSUN2 SAKI TRM4	5	0.400013	6.94833e+06	40.0013	393
TUBB4A TUBB4 TUBB5	8	0.48115	6.91218e+06	48.115	394
NDUFA10	8	0.122312	6.90958e+06	12.2312	395
EEF1A1 EEF1A EF1A LENG7	8	0.170342	6.9073e+06	17.0342	396
OMD SLRR2C UNQ190/PRO216	7	0.847528	6.886e+06	84.7528	397
EEF1A2 EEF1AL STN	4	0.273331	6.87066e+06	27.3331	398
BCAP31 BAP31 DXS1357E	5	0.797321	6.86557e+06	79.7321	399
SRPK1	6	0.626212	6.84191e+06	62.6212	400
DPP7 DPP2 QPP	4	0.669229	6.83146e+06	66.9229	401
FOLH1 FOLH NAALAD1 PSM PSMA GIG27	8	0.166156	6.82695e+06	16.6156	402
HPR	8	0.351563	6.7968e+06	35.1563	403
FGL2	8	0.0891031	6.79168e+06	8.91031	404
IRGQ IRGQ1 FKSG27	8	0.154084	6.78108e+06	15.4084	405
C4BPA C4BP	8	0.250229	6.77636e+06	25.0229	406
TUBB6	4	0.512835	6.776e+06	51.2835	407
SART3 KIAA0156 TIP110	4	0.200931	6.70837e+06	20.0931	408
ATXN10 SCA10	6	0.188755	6.67052e+06	18.8755	409
PNKP	5	0.268604	6.6635e+06	26.8604	410
RTN4RL2 NGRH1 NGRL3	8	0.151775	6.66163e+06	15.1775	411
NDUFAF3 C3orf60	8	0.721385	6.65974e+06	72.1385	412
COL12A1 COL12A1L	8	0.185436	6.6213e+06	18.5436	413
CUL1	6	0.302531	6.61208e+06	30.2531	414
XPNPEP2	4	0.270337	6.60765e+06	27.0337	415
TRAM1 TRAM	5	0.423265	6.59106e+06	42.3265	416
SOD1	4	0.276769	6.57495e+06	27.6769	417
PLXDC2 TEM7R UNQ2514/PRO6003	5	0.772867	6.56511e+06	77.2867	418
ITGAV MSK8 VNRA VTNR	4	0.34289	6536800	34.289	419
FMOD FM SLRR2E	8	1.0041	6.46932e+06	100.41	420
MX1	5	0.434023	6.46881e+06	43.4023	421
SUMF2 PSEC0171 UNQ1968/PRO4500	8	0.36675	6.4157e+06	36.675	422
DHX9 DDX9 LKP NDH2	7	0.261459	6.40154e+06	26.1459	423
PRKRA PACT RAX HSD-14 HSD14	7	0.158172	6.39209e+06	15.8172	424
MFN1	5	0.195047	6.33379e+06	19.5047	425
RACK1 GNB2L1 HLC7 PIG21	6	0.208136	6.30899e+06	20.8136	426
UGDH	8	0.160864	6268985	16.0864	427
L2HGDH C14orf160	8	0.147835	6.2625e+06	14.7835	428
PTPRJ DEP1	7	0.411559	6.24381e+06	41.1559	429
SNX29 RUNDC2A	8	0.0194994	6.17062e+06	1.94994	430
KRT15	8	0.226909	6.06979e+06	22.6909	431
RAB11A RAB11	7	0.456673	6.04445e+06	45.6673	432
MRPL15 HSPC145	6	0.266876	5.95573e+06	26.6876	433
IGHG3	8	0.22772	5.90942e+06	22.772	434
SERPINA3 AACT GIG24 GIG25	8	0.391075	5.88849e+06	39.1075	435
EXOC3 SEC6 SEC6L1	7	0.193365	5.85713e+06	19.3365	436
MSH2	7	0.190612	5.82902e+06	19.0612	437
RRP7A CGI-96	6	0.345607	5.82489e+06	34.5607	438
MYO1C	6	0.188612	5790525	18.8612	439
RNPEP APB	7	0.266908	5.78332e+06	26.6908	440
FN1 FN	7	0.394536	5.76322e+06	39.4536	441
COTL1 CLP	4	0.439228	5.76198e+06	43.9228	442
IGBP1 IBP1	8	0.0151384	5.754e+06	1.51384	443
PTPN12	8	0.050625	5.74496e+06	5.0625	444
ZFR	8	0.0179472	5.73734e+06	1.79472	445
SKP1 EMC19 OCP2 SKP1A TCEB1L	4	0.291515	5.73179e+06	29.1515	446
DDAH2 DDAH G6A NG30	4	0.204509	5.70756e+06	20.4509	447
HEPACAM	4	0.503386	5.67253e+06	50.3386	448
KIF5B KNS KNS1	6	0.466326	5.65635e+06	46.6326	449
ALPL	6	0.404304	5.62572e+06	40.4304	450
TPM4	7	0.663758	5.62426e+06	66.3758	451
ADAM9 KIAA0021 MCMP MDC9 MLTNG	5	0.54733	5.58604e+06	54.733	452
SNCA NACP PARK1	4	0.18092	5.57966e+06	18.092	453
APCS PTX2	7	0.0576792	5.57592e+06	5.76792	454
FBL FIB1 FLRN	6	0.230158	5.57189e+06	23.0158	455
CD200 MOX1 MOX2 My033	6	0.487472	5.55384e+06	48.7472	456
EPS8	6	0.200481	5.5431e+06	20.0481	457
SLIT2 SLIL3	4	0.209437	5.53158e+06	20.9437	458
ALDH7A1 ATQ1	7	0.314569	5.46849e+06	31.4569	459
OIT3 LZP UNQ826/PRO1753	7	0.34259	5.38057e+06	34.259	460
TNS2 KIAA1075 TENC1	7	0.375456	5.35724e+06	37.5456	461
HBD	6	0.193616	5.35139e+06	19.3616	462
COL6A3	7	0.273245	5.34878e+06	27.3245	463
MAT2B TGR MSTP045 Nbla02999 UNQ2435/PRO4995	7	0.379743	5.32142e+06	37.9743	464
GSN	8	0.325043	5.26391e+06	32.5043	465
GSK3B	4	0.182681	5.23441e+06	18.2681	466
APOA4	8	0.167731	5.16283e+06	16.7731	467
GAS6 AXLLG	8	0.408142	5.15855e+06	40.8142	468
RELA NFKB3	7	0.112711	5.13905e+06	11.2711	469
IGKV1-6	8	0.208685	5.13524e+06	20.8685	470
ARF3	7	0.147473	5.12533e+06	14.7473	471
IGLV3-9	8	0.222306	5.11429e+06	22.2306	472
UFD1 UFD1L	5	0.192459	5.11326e+06	19.2459	473
IGHV2-70D	8	0.304871	5.11176e+06	30.4871	474
PARP14 BAL2 KIAA1268	6	0.196872	5.0932e+06	19.6872	475
CPM	8	0.153919	5.09156e+06	15.3919	476
VPS35 MEM3 TCCCTA00141	5	0.634031	5.06847e+06	63.4031	477
ITIH3	8	0.399334	5.06704e+06	39.9334	478
SLMAP KIAA1601 SLAP UNQ1847/PRO3577	5	0.216451	5.05379e+06	21.6451	479
PDS5B APRIN AS3 KIAA0979	4	0.404078	5.05141e+06	40.4078	480
SGCE ESG UNQ433/PRO840	6	0.626411	5.04031e+06	62.6411	481
LBR	5	0.877121	5.02711e+06	87.7121	482
PUSL1	8	0.0440952	5013625	4.40952	483
CD163 M130	7	0.546443	4.99848e+06	54.6443	484
ATP6V1A ATP6A1 ATP6V1A1 VPP2	5	0.233249	4.99606e+06	23.3249	485
PCSK9 NARC1 PSEC0052	8	0.123173	4.98976e+06	12.3173	486
HMGCS2	8	0.320534	4.97089e+06	32.0534	487
EHD1 PAST PAST1 CDABP0131	7	0.255582	4.94817e+06	25.5582	488
H3-3A H3.3A H3F3 H3F3A PP781; H3-3B H3.3B H3F3B	8	0.115764	4.91061e+06	11.5764	489
HSPH1 HSP105 HSP110 KIAA0201	8	0.140668	4.90966e+06	14.0668	490
VPS25 DERP9 EAP20	4	0.179999	4.9045e+06	17.9999	491
GABBR1 GPRC3A	8	0.16653	4.89672e+06	16.653	492
KLHL36 C16orf44	8	0.0845773	4.8686e+06	8.45773	493
KRT10 KPP	8	0.226281	4.85229e+06	22.6281	494
PIK3R4 VPS15	4	0.44544	4842235	44.544	495
SERPING1 C1IN C1NH	8	0.123199	4.83791e+06	12.3199	496
PAPSS1 ATPSK1 PAPSS	8	0.271448	4.8041e+06	27.1448	497
FHOD1 FHOS FHOS1	7	0.16996	4.79897e+06	16.996	498
RRBP1 KIAA1398	8	0.0633684	4.79405e+06	6.33684	499
IGFBP7 MAC25 PSF	7	0.117152	4.77335e+06	11.7152	500
KRT86 KRTHB6	5	0.627407	4.77202e+06	62.7407	501
IGKV3D-15	8	0.382258	4.75195e+06	38.2258	502
TF PRO1400	8	0.0862758	4.74569e+06	8.62758	503
MPP3 DLG3	7	0.173418	4.71373e+06	17.3418	504
IGLV2-11	8	0.255156	4.71121e+06	25.5156	505
LSR ILDR3 LISCH	8	0.16109	4.70226e+06	16.109	506
PON1 PON	8	0.15662	4.69393e+06	15.662	507
SMARCA5 SNF2H WCRF135	8	0.644795	4.66706e+06	64.4795	508
NPC2 HE1	7	0.160241	4.662e+06	16.0241	509
EBNA1BP2 EBP2	7	0.0462557	4.62888e+06	4.62557	510
ATP5F1B ATP5B ATPMB ATPSB	7	0.239494	4.62848e+06	23.9494	511
EXOG ENDOGL1 ENDOGL2 ENGL	7	0.259531	4.62744e+06	25.9531	512
GANAB G2AN KIAA0088	8	0.130747	4.60942e+06	13.0747	513
RIN2 RASSF4	7	0.120622	4.57933e+06	12.0622	514
STAMBP AMSH	7	0.308969	4.55897e+06	30.8969	515
AMY1C AMY1	5	0.186861	4.5476e+06	18.6861	516
GIGYF2 KIAA0642 PERQ2 TNRC15	5	0.744638	4.54139e+06	74.4638	517
CTSV CATL2 CTSL2 CTSU UNQ268/PRO305	7	0.374755	4.51882e+06	37.4755	518
MOV10 KIAA1631	4	0.845947	4512510	84.5947	519
TLK2	5	0.274334	4.48667e+06	27.4334	520
UBE2N BLU	5	0.697561	4.47884e+06	69.7561	521
IGHA2	8	0.281626	4.44159e+06	28.1626	522
HSPA5 GRP78	7	0.964368	4.43989e+06	96.4368	523
TMX4 KIAA1162 TXNDC13 PSEC0095 UNQ475/PRO938	4	0.326723	4.43311e+06	32.6723	524
NDUFAF6 C8orf38	5	0.296069	4415990	29.6069	525
BIN3	8	0.135082	4.41438e+06	13.5082	526
SCARB2 CD36L2 LIMP2 LIMPII	8	0.526798	4.3973e+06	52.6798	527
POTEI	8	0.340522	4.38721e+06	34.0522	528
MPHOSPH8 MPP8	7	0.517394	4.38423e+06	51.7394	529
PAICS ADE2 AIRC PAIS	8	0.102557	4.35222e+06	10.2557	530
APOM G3A NG20 HSPC336	8	0.490786	4.33579e+06	49.0786	531
SERAC1	6	0.276722	4.3222e+06	27.6722	532
GALNT2	4	0.268988	4307685	26.8988	533
CFHR2 CFHL2 FHR2 HFL3	8	0.215379	4.29989e+06	21.5379	534
EPPK1 EPIPL	8	0.204974	4.29491e+06	20.4974	535
CTNNA1	6	0.791897	4.28682e+06	79.1897	536
SRGN PRG PRG1	8	0.0578994	4.27485e+06	5.78994	537
RCCD1	5	0.340244	4.2711e+06	34.0244	538
ARSD	7	0.482603	4.25178e+06	48.2603	539
FXR1	5	0.72137	4.20916e+06	72.137	540
ITIH2 IGHEP2	8	0.272091	4.19777e+06	27.2091	541
ACE2 UNQ868/PRO1885	6	0.63892	4.19424e+06	63.892	542
FLNC ABPL FLN2	5	0.184762	4.14069e+06	18.4762	543
BSG UNQ6505/PRO21383	5	0.761171	4.13319e+06	76.1171	544
PCYT2	4	0.21688	4.11895e+06	21.688	545
DSP	6	0.401971	4.11466e+06	40.1971	546
RDH13 SDR7C3 PSEC0082 UNQ736/PRO1430	8	0.0993068	4.11107e+06	9.93068	547
DCTN1	6	0.22244	4.10101e+06	22.244	548
IGHV3-64D	8	0.274086	4.09578e+06	27.4086	549
PSMB7 Z	5	0.349214	4.09562e+06	34.9214	550
LDHA PIG19	8	0.00871727	4.08981e+06	0.871727	551
ELMOD2	8	0.0629689	4.0831e+06	6.29689	552
GMPS	7	0.264096	4.07918e+06	26.4096	553
ITIH1 IGHEP1	8	0.190717	4.07199e+06	19.0717	554
SMAD9 MADH6 MADH9 SMAD8	8	0.29957	4.06768e+06	29.957	555
OSBP OSBP1	4	0.294466	4.05087e+06	29.4466	556
CRYAB CRYA2 HSPB5	4	0.596602	4046020	59.6602	557
EFNA1 EPLG1 LERK1 TNFAIP4	5	0.228218	4.04482e+06	22.8218	558
SELENOI EPT1 KIAA1724 SELI	4	0.249058	4.04091e+06	24.9058	559
MSN	5	0.278412	4.03858e+06	27.8412	560
MCM4 CDC21	8	0.0922951	4025590	9.22951	561
LRRC47 KIAA1185	5	0.377563	3.99938e+06	37.7563	562
USO1 VDP	6	0.20838	3.97194e+06	20.838	563
RPS4X CCG2 RPS4 SCAR	7	0.232236	3.94549e+06	23.2236	564
GGT6	7	0.510094	3944094	51.0094	565
SPTAN1 NEAS SPTA2	7	0.273404	3925102	27.3404	566
SGMS1 MOB SMS1 TMEM23	8	0.143571	3.85175e+06	14.3571	567
SEMG2	6	0.621277	3.81432e+06	62.1277	568
UGGT1 GT UGCGL1 UGGT UGT1 UGTR	4	0.452411	3.80163e+06	45.2411	569
EZR VIL2	8	0.329043	3.77828e+06	32.9043	570
BCS1L BCS1	7	0.215976	3.77565e+06	21.5976	571
CCNK CPR4	8	0.155688	3.77531e+06	15.5688	572
ABHD16A BAT5 G5 NG26 PP199	8	0.0286754	3775290	2.86754	573
PKP2	7	0.042427	3.75358e+06	4.2427	574
HSPA1A HSP72 HSPA1 HSX70	5	0.264174	3.73906e+06	26.4174	575
C1QB	8	0.26165	3.71883e+06	26.165	576
PLXNA4 KIAA1550 PLXNA4A PLXNA4B UNQ2820/PRO34003	7	0.561039	3.71495e+06	56.1039	577
ELP1 IKAP IKBKAP	8	0.0983938	3.69485e+06	9.83938	578
MIF GLIF MMIF	5	0.202267	3.68518e+06	20.2267	579
AHNAK PM227	6	0.268626	3645790	26.8626	580
MPST TST2	4	0.181342	3.64206e+06	18.1342	581
ABHD14B CIB	6	0.435511	3619955	43.5511	582
ADA2 ADGF CECR1 IDGFL	5	0.377012	3.61971e+06	37.7012	583
GDI2 RABGDIB	6	0.233214	3.61557e+06	23.3214	584
CDH2 CDHN NCAD	7	0.395031	3.61392e+06	39.5031	585
GPC4 UNQ474/PRO937	8	0.172864	3.60717e+06	17.2864	586
EIF4A1 DDX2A EIF4A	7	0.554496	3.5957e+06	55.4496	587
HAAO	4	0.20206	3592325	20.206	588
ITGB2 CD18 MFI7	7	0.390896	3.59107e+06	39.0896	589
PSMC2 MSS1	8	0.174711	3578015	17.4711	590
IGLV8-61	8	0.204487	3.57555e+06	20.4487	591
JUP CTNNG DP3	7	0.102859	3.55524e+06	10.2859	592
KHSRP FUBP2	8	0.761008	3.55303e+06	76.1008	593
TMEM126A	6	0.226488	3.54978e+06	22.6488	594
HNRNPL HNRPL P/OKcl.14	8	0.0689509	3.54877e+06	6.89509	595
HMGCS1 HMGCS	5	0.65654	3.54019e+06	65.654	596
TXNDC5 TLP46 UNQ364/PRO700	7	0.257419	3.53654e+06	25.7419	597
ARFGEF3 BIG3 C6orf92 KIAA1244	6	0.225594	3521750	22.5594	598
TOP2B	7	0.235924	3.47174e+06	23.5924	599
COQ7	7	0.153163	3.44912e+06	15.3163	600
CSE1L CAS XPO2	4	0.919717	3.44122e+06	91.9717	601
VAT1L KIAA1576	8	0.00935168	3.43304e+06	0.935168	602
PLA2G7 PAFAH	4	0.316864	3.41171e+06	31.6864	603
ATG13 KIAA0652	4	0.358631	3409495	35.8631	604
DPEP2 UNQ284/PRO323	5	0.225236	3.40683e+06	22.5236	605
CPSF2 CPSF100 KIAA1367	6	0.752518	3.40664e+06	75.2518	606
MED11 HSPC296	5	0.686886	3.39038e+06	68.6886	607
FUBP3 FBP3	7	0.337635	3.36917e+06	33.7635	608
TMEM205 UNQ501/PRO1018	8	0.1719	3.35449e+06	17.19	609
SEPTIN11 SEPT11	4	0.275446	3.34938e+06	27.5446	610
AGRN AGRIN	5	0.856169	3.34551e+06	85.6169	611
SNAP25 SNAP	4	0.539569	3344930	53.9569	612
CXADR CAR	8	0.0211718	3.32306e+06	2.11718	613
PDGFRB PDGFR PDGFR1	7	0.744703	3.32064e+06	74.4703	614
PLA2G12B PLA2G13 FKSG71	5	0.351727	3.31631e+06	35.1727	615
RAB3IL1	7	0.105828	3278570	10.5828	616
FH	5	0.374631	3.27504e+06	37.4631	617
MPO	8	0.201214	3.26206e+06	20.1214	618
P3H3 LEPREL2	7	0.0826812	3.25267e+06	8.26812	619
AHSP EDRF ERAF	5	0.420355	3247290	42.0355	620
TFAP2A AP2TF TFAP2	8	0.416178	3.21551e+06	41.6178	621
MAP2K7 JNKK2 MEK7 MKK7 PRKMK7 SKK4	8	0.170937	3.19353e+06	17.0937	622
GINS3 PSF3	5	0.391855	3.18381e+06	39.1855	623
MYO18A CD245 KIAA0216 MYSPDZ TIAF1	5	0.323082	3.17833e+06	32.3082	624
PPP2CB	8	0.0182738	3.17066e+06	1.82738	625
GC	7	0.30547	3.16911e+06	30.547	626
KRT8 CYK8	6	0.820591	3.16819e+06	82.0591	627
KRT34 HHA4 HKA4 KRTHA4	5	0.416651	3155570	41.6651	628
NRP1 NRP VEGF165R	8	0.0903486	3.13826e+06	9.03486	629
SNX30	8	0.0330755	3.13119e+06	3.30755	630
INA NEF5	7	0.31557	3.12725e+06	31.557	631
BGN SLRR1A	8	0.00293889	3.11308e+06	0.293889	632
NUFIP2 KIAA1321 PIG1	8	0.0882457	3.10964e+06	8.82457	633
ARHGDIB GDIA2 GDID4 RAP1GN1	7	0.290419	3.10844e+06	29.0419	634
ENPP7 UNQ3077/PRO9912	6	0.374179	3.09903e+06	37.4179	635
NOLC1 KIAA0035 NS5ATP13	5	0.631893	3.0835e+06	63.1893	636
PDXK C21orf124 C21orf97 PKH PNK PRED79	5	0.792787	3.06617e+06	79.2787	637
ALB	8	0.43103	3.05582e+06	43.103	638
IGLV2-8	5	0.439686	3042020	43.9686	639
PLIN3 M6PRBP1 TIP47	4	0.310772	3.04185e+06	31.0772	640
ATAD1 FNP001	4	0.264617	2.98575e+06	26.4617	641
SETSIP SETP18	7	0.139158	2.97564e+06	13.9158	642
PLEK P47	8	0.178401	2.97562e+06	17.8401	643
SKAP2 PRAP RA70 SAPS SCAP2 SKAP55R	8	0.405526	2.974e+06	40.5526	644
DCHS1 CDH19 CDH25 FIB1 KIAA1773 PCDH16	4	0.237244	2.96863e+06	23.7244	645
APEX1 APE APE1 APEX APX HAP1 REF1	7	0.278363	2.96198e+06	27.8363	646
VPS35L C16orf62 101F10.2	6	0.47911	2.94874e+06	47.911	647
PNLIP	5	0.548218	2.94309e+06	54.8218	648
RPS6KA2 MAPKAPK1C RSK3	5	0.380184	2.93345e+06	38.0184	649
IGHV1-2	8	0.137594	2.91596e+06	13.7594	650
RAB6B	4	0.946216	2905818	94.6216	651
NUP98 ADAR2	7	0.147921	2.84124e+06	14.7921	652
ACACB ACC2 ACCB	8	0.145322	2.8309e+06	14.5322	653
COL6A6	7	0.0728111	2.82654e+06	7.28111	654
ARL2	8	0.577179	2.82437e+06	57.7179	655
RAD23B	6	0.336901	2.81694e+06	33.6901	656
DCN SLRR1B	5	0.627863	2812000	62.7863	657
CP	8	0.19901	2.79695e+06	19.901	658
CORO7	4	0.737238	2775845	73.7238	659
CTTN EMS1	6	0.238014	2.73978e+06	23.8014	660
SLC27A4 ACSVL4 FATP4	5	0.759573	2.73824e+06	75.9573	661
MTMR3 KIAA0371 ZFYVE10	7	0.143017	2.73439e+06	14.3017	662
GTF2E2 TF2E2	5	0.260242	2.72539e+06	26.0242	663
MAP3K20 MLTK ZAK HCCS4	8	0.14404	2.71881e+06	14.404	664
GUSB	7	0.355304	2.70672e+06	35.5304	665
POGZ KIAA0461 SUHW5 ZNF280E ZNF635 Nbla00003	6	0.327706	2.70134e+06	32.7706	666
LUM LDC SLRR2D	8	0.320616	2.69451e+06	32.0616	667
LILRB4 ILT3 LIR5	5	0.817907	2.69251e+06	81.7907	668
MTA2 MTA1L1 PID	5	0.619746	2.69199e+06	61.9746	669
CLASP1 KIAA0622 MAST1	8	0.113906	2.68762e+06	11.3906	670
DHTKD1 KIAA1630	8	0.483406	2.68686e+06	48.3406	671
PDCD6 ALG2	4	0.655135	2653545	65.5135	672
ARHGEF37	4	0.187935	2.64321e+06	18.7935	673
GPN1 MBDIN RPAP4 XAB1 HUSSY-23	5	0.282526	2.64228e+06	28.2526	674
STAT1	6	0.342419	2.64009e+06	34.2419	675
AZGP1 ZAG ZNGP1	7	0.75006	2.62474e+06	75.006	676
TIMP1 CLGI TIMP	8	0.730337	2.61965e+06	73.0337	677
CTNNA2 CAPR	4	0.962893	2.61887e+06	96.2893	678
FUT3 FT3B LE	8	0.122148	2.6162e+06	12.2148	679
PRCP PCP	8	0.11619	2611050	11.619	680
ATG9A APG9L1	7	0.351294	2.60994e+06	35.1294	681
WAPL FOE KIAA0261 WAPAL	8	0.238457	2.6058e+06	23.8457	682
PJA2 KIAA0438 RNF131	7	0.0089255	2.60418e+06	0.89255	683
BCL2L15 C1orf178	8	0.600503	2.58836e+06	60.0503	684
GSTM1 GST1	7	0.334257	2.57516e+06	33.4257	685
SERPINF2 AAP PLI	8	0.592944	2.56474e+06	59.2944	686
IGHV1-46	8	0.0941168	2.56073e+06	9.41168	687
PPIB CYPB	5	0.751458	2.55941e+06	75.1458	688
GRB10 GRBIR KIAA0207	8	0.112769	2.55071e+06	11.2769	689
IGHD	8	0.220647	2.54808e+06	22.0647	690
IGHV3-48	6	0.603446	2.5411e+06	60.3446	691
GSTA4	4	0.19045	2.53534e+06	19.045	692
POTEF A26C1B	7	0.460182	2.53039e+06	46.0182	693
UPF2 KIAA1408 RENT2	6	0.726709	2.52067e+06	72.6709	694
MEF2D	6	0.220198	2.51725e+06	22.0198	695
C8B	8	0.318579	2.50861e+06	31.8579	696
SLC27A2 ACSVL1 FACVL1 FATP2 VLACS	5	0.410119	2.50857e+06	41.0119	697
PSMD8	7	0.573711	2.50232e+06	57.3711	698
SLC23A1 SVCT1 YSPL3	4	0.705021	2.49654e+06	70.5021	699
VAV1 VAV	6	0.547429	2491970	54.7429	700
SACM1L KIAA0851 SAC1	5	0.51169	2.47901e+06	51.169	701
IGLV1-51	8	0.235568	2.47563e+06	23.5568	702
PTBP3 ROD1	5	0.223994	2.47483e+06	22.3994	703
ZCRB1	6	0.309169	2.46852e+06	30.9169	704
RANGAP1 KIAA1835 SD	4	0.183045	2.46595e+06	18.3045	705
SERPINF1 PEDF PIG35	8	0.264105	2.46204e+06	26.4105	706
CYCS CYC	5	0.419193	2.45529e+06	41.9193	707
ALDOA ALDA	8	0.666944	2.44403e+06	66.6944	708
SLC3A2 MDU1	5	0.831578	2.43275e+06	83.1578	709
AOC1 ABP1 DAO1	5	0.624638	2.42658e+06	62.4638	710
RIDA HRSP12	8	0.0209394	2426315	2.09394	711
WASL	6	0.538477	2.4188e+06	53.8477	712
GDI1 GDIL OPHN2 RABGDIA XAP4	6	0.179945	2.38474e+06	17.9945	713
C1RL C1RL1 C1RLP CLSPA	8	0.429627	2.38064e+06	42.9627	714
SSB	7	0.442665	2.3744e+06	44.2665	715
ALDOA	6	0.330487	2.36784e+06	33.0487	716
OGDH	8	0.0702556	2.36416e+06	7.02556	717
COX5A	6	0.623937	2.35985e+06	62.3937	718
MYL4 MLC1 PRO1957	7	0.410866	2.3578e+06	41.0866	719
ATP4B	4	0.294658	2339445	29.4658	720
CHMP4A C14orf123 SHAX2 CDA04 HSPC134	8	0.626975	2.33643e+06	62.6975	721
YWHAH YWHA1	8	0.154941	2328905	15.4941	722
USP34 KIAA0570 KIAA0729	5	0.365939	2.32695e+06	36.5939	723
IGLV2-18	8	0.213257	2.3229e+06	21.3257	724
PRRC2C BAT2D1 BAT2L2 KIAA1096 XTP2	4	0.345528	2318060	34.5528	725
UACA KIAA1561	4	0.637872	2.31586e+06	63.7872	726
TPP1 CLN2 GIG1 UNQ267/PRO304	5	0.0296108	2.31048e+06	2.96108	727
NNT	7	0.149151	2.31044e+06	14.9151	728
LOXL2	6	0.330609	2.28903e+06	33.0609	729
NAPSA NAP1 NAPA	7	1.01986	2.28497e+06	101.986	730
CEACAM8 CGM6	8	0.197663	2.27449e+06	19.7663	731
GAPVD1 GAPEX5 KIAA1521 RAP6	5	0.199966	2.27293e+06	19.9966	732
SERPINA4 KST PI4	8	0.372417	2.24439e+06	37.2417	733
PLCG2	5	0.354499	2.24113e+06	35.4499	734
URI1 C19orf2 NNX3 PPP1R19 RMP URI	7	0.480009	2.24096e+06	48.0009	735
IGHV1-3	8	0.300426	2.23782e+06	30.0426	736
ITPR1 INSP3R1	4	0.452971	2230260	45.2971	737
CHI3L1	4	0.679025	2.2278e+06	67.9025	738
LPA	8	0.497105	2.22683e+06	49.7105	739
ASAH1 ASAH HSD-33 HSD33	7	0.615866	2.22618e+06	61.5866	740
NNMT	8	0.167664	2.22224e+06	16.7664	741
F5	8	0.235923	2.22096e+06	23.5923	742
CLIC4	4	0.623491	2.22089e+06	62.3491	743
INTS10 C8orf35	5	0.465331	2.21919e+06	46.5331	744
SARM1 KIAA0524 SAMD2 SARM	4	0.709635	2.20349e+06	70.9635	745
PLBD1	8	0.327024	2.20299e+06	32.7024	746
LGALS8	4	0.805814	2.20273e+06	80.5814	747
BSN KIAA0434 ZNF231	8	0.168649	2.19879e+06	16.8649	748
IGLV1-36	8	0.199823	2.19827e+06	19.9823	749
ALG2 UNQ666/PRO1298	4	0.479305	2.198e+06	47.9305	750
SYNPO2	8	0.494385	2.1963e+06	49.4385	751
AHR BHLHE76	5	0.339715	2.19211e+06	33.9715	752
PTPN11 PTP2C SHPTP2	5	0.329643	2.19191e+06	32.9643	753
IGHV3-38	8	0.190198	2.18882e+06	19.0198	754
PXDN KIAA0230 MG50 PRG2 PXD01 VPO VPO1	4	0.607871	2.18274e+06	60.7871	755
ANXA6 ANX6	8	0.171526	2.18002e+06	17.1526	756
TLE3 KIAA1547	6	0.943911	2.1621e+06	94.3911	757
SERPINE1 PAI1 PLANH1	7	0.253628	2.16189e+06	25.3628	758
SPECC1L CYTSA KIAA0376	6	0.379772	2.16137e+06	37.9772	759
IGLV1-44	8	0.192055	2.13443e+06	19.2055	760
ASB3	6	0.30006	2.12698e+06	30.006	761
HSPB6	8	0.0342083	2.12683e+06	3.42083	762
VPS11 RNF108 PP3476	7	0.38662	2.11533e+06	38.662	763
CDC42EP4 BORG4 CEP4	4	0.244319	2.11042e+06	24.4319	764
SIRPA BIT MFR MYD1 PTPNS1 SHPS1 SIRP	8	0.0517976	2.10336e+06	5.17976	765
CAPG AFCP MCP	8	0.369022	2.10224e+06	36.9022	766
ADGRB3 BAI3 KIAA0550	8	0.205419	2.07609e+06	20.5419	767
TOLLIP	6	0.521933	2.07245e+06	52.1933	768
GLA	5	0.400657	2.06733e+06	40.0657	769
CFH HF HF1 HF2	8	0.24155	2.0629e+06	24.155	770
HMOX1 HO HO1	6	0.961928	2.05921e+06	96.1928	771
HADHA HADH	7	0.232191	2057830	23.2191	772
USP9X DFFRX FAM USP9	8	0.570136	2.05334e+06	57.0136	773
MCCC2 MCCB	8	0.0140089	2.04263e+06	1.40089	774
SCYL2 CVAK104 KIAA1360	8	0.00442735	2.04072e+06	0.442735	775
C7	7	0.125489	2.0356e+06	12.5489	776
CTNND2 NPRAP	4	0.45441	2.03464e+06	45.441	777
IGLL1 IGL1	8	0.236084	2.03358e+06	23.6084	778
MNDA	8	0.463945	2.03285e+06	46.3945	779
RGN SMP30	4	0.873854	2.02988e+06	87.3854	780
BTAF1 TAF172	7	0.374734	2.02221e+06	37.4734	781
CLTCL1 CLH22 CLTCL CLTD	7	0.16434	2.016e+06	16.434	782
GPX3 GPXP	8	0.305512	2.00492e+06	30.5512	783
	7	0.128507	2003400	12.8507	784
CLIP1 CYLN1 RSN	6	0.443928	2.00329e+06	44.3928	785
C1QA	8	0.225703	2.00322e+06	22.5703	786
KRT19	7	0.44015	1.99959e+06	44.015	787
SEC23IP MSTP053	7	0.155133	1995270	15.5133	788
TNFAIP8L3 TIPE3	8	0.0602654	1990305	6.02654	789
MYH11 KIAA0866	4	0.701263	1.98669e+06	70.1263	790
GP5	5	0.265266	1.98532e+06	26.5266	791
IGLON5	7	0.0279098	1.98452e+06	2.79098	792
GPLD1 PIGPLD1	8	0.397941	1.97538e+06	39.7941	793
CSN1S1	8	0.599951	1.96887e+06	59.9951	794
IGKV2-30	7	0.294863	1.96876e+06	29.4863	795
SELENOP SELP SEPP1	8	0.208488	1.96299e+06	20.8488	796
FTL	8	0.350367	1.95229e+06	35.0367	797
EIF4G3	5	0.801679	1.95072e+06	80.1679	798
ANXA10 ANX14	4	0.566643	1.93391e+06	56.6643	799
PSMA7 HSPC	8	0.24547	1.92709e+06	24.547	800
SEPTIN7 CDC10 SEPT7	7	0.260456	1.92593e+06	26.0456	801
HEBP1 HBP	8	0.363163	1.91739e+06	36.3163	802
SEH1L SEC13L SEH1	5	0.361729	1.91481e+06	36.1729	803
AGT SERPINA8	7	0.159564	1.91378e+06	15.9564	804
CAMK2D CAMKD	8	0.314384	1.91061e+06	31.4384	805
TMED4 ERS25	4	0.460434	1.90475e+06	46.0434	806
CAPN1 CANPL1 PIG30	7	0.632478	1.89546e+06	63.2478	807
MMP3 STMY1	6	0.873176	1.89134e+06	87.3176	808
SQOR SQRDL CGI-44	4	0.881611	1.88898e+06	88.1611	809
ACTA1 ACTA	7	0.211755	1.88564e+06	21.1755	810
IGKV1-16	5	0.791727	1.8756e+06	79.1727	811
LAMB2 LAMS	4	0.435024	1.85178e+06	43.5024	812
CEP170 FAM68A KAB KIAA0470	8	0.0852441	1839600	8.52441	813
HMGB3 HMG2A HMG4	6	0.266486	1.82149e+06	26.6486	814
NEDD1	8	0.245464	1.82067e+06	24.5464	815
ARPC4 ARC20	6	0.782974	1.81326e+06	78.2974	816
IGKV1-12	8	0.257015	1.81007e+06	25.7015	817
CA2	7	0.792415	1.80985e+06	79.2415	818
RO60 SSA2 TROVE2	7	0.254435	1.8086e+06	25.4435	819
ADAMTS1 KIAA1346 METH1	5	0.267428	1.80605e+06	26.7428	820
USP39 CGI-21 HSPC332 PRO2855	7	0.322776	1.79699e+06	32.2776	821
CACNA2D1 CACNL2A CCHL2A MHS3	6	0.226518	1.79304e+06	22.6518	822
F12	8	0.265354	1.79029e+06	26.5354	823
HPDL GLOXD1	4	0.475419	1786245	47.5419	824
CALB1 CAB27	7	0.246189	1.77998e+06	24.6189	825
KLKB1 KLK3	8	0.362331	1.77816e+06	36.2331	826
IGFALS ALS	8	0.25661	1.77655e+06	25.661	827
EVPL	8	0.308222	1.77118e+06	30.8222	828
TREM2	5	0.723607	1.76455e+06	72.3607	829
APOC1	8	0.246526	1.76273e+06	24.6526	830
CUL4B KIAA0695	8	0.124029	1762560	12.4029	831
PPBP CTAP3 CXCL7 SCYB7 TGB1 THBGB1	8	0.355202	1.75932e+06	35.5202	832
FAM98A	5	0.289453	1.75504e+06	28.9453	833
SULT2A1 HST STD	5	0.225034	1.75482e+06	22.5034	834
AMPD3	8	0.416681	1.74239e+06	41.6681	835
NCKAP1 HEM2 KIAA0587 NAP1	4	0.449666	1.72347e+06	44.9666	836
STAB1 FEEL1 KIAA0246	7	0.029531	1.70502e+06	2.9531	837
ABI3BP NESHBP TARSH	8	0.399906	1.70113e+06	39.9906	838
RCC1L WBSCR16	8	0.135107	1.69315e+06	13.5107	839
SPR	4	0.294017	1.68713e+06	29.4017	840
AK2 ADK2	8	0.299217	1.68646e+06	29.9217	841
PTER	7	0.527324	1.67511e+06	52.7324	842
PGLYRP2 PGLYRPL PGRPL UNQ3103/PRO10102	7	0.299717	1.66169e+06	29.9717	843
IGKV1D-16	7	0.266938	1.64471e+06	26.6938	844
ACTA2 ACTSA ACTVS GIG46	8	0.267086	1.6444e+06	26.7086	845
ISLR UNQ189/PRO215	6	0.482155	1.64253e+06	48.2155	846
SEPTIN4 C17orf47 PNUTL2 SEP4 SEPT4 hucep-7	4	0.288552	1636470	28.8552	847
ATRN KIAA0548 MGCA	7	0.152576	1.63144e+06	15.2576	848
C4B CO4 CPAMD3; C4B_2	8	0.321945	1.62483e+06	32.1945	849
PLIN2 ADFP	8	0.123702	1.62236e+06	12.3702	850
IL4I1 FIG1 UNQ636/PRO1265	8	0.117869	1.62182e+06	11.7869	851
AHCYL2 KIAA0828	8	0.119425	1621685	11.9425	852
PSMD12	5	0.475363	1.61882e+06	47.5363	853
MCM7 CDC47 MCM2	6	0.684807	1.61532e+06	68.4807	854
BPI	5	0.19821	1614390	19.821	855
ADCK5	5	0.459733	1.61407e+06	45.9733	856
SERPINA5 PCI PLANH3 PROCI	8	0.113208	1.60998e+06	11.3208	857
ECM1	8	0.301128	1.60886e+06	30.1128	858
IGHV4-4	4	0.466327	1.60269e+06	46.6327	859
LGALS2	4	0.358068	1.59442e+06	35.8068	860
ADAMTS13 C9orf8 UNQ6102/PRO20085	7	0.197077	1.59024e+06	19.7077	861
EFTUD2 KIAA0031 SNRP116	6	0.276532	1.5899e+06	27.6532	862
HELZ2 KIAA1769 PRIC285	5	0.191648	1.58244e+06	19.1648	863
ANK1 ANK	8	0.455455	1.58064e+06	45.5455	864
MME EPN	4	0.331608	1.56829e+06	33.1608	865
PGD PGDH	8	0.138681	1567635	13.8681	866
IL1RN IL1F3 IL1RA	8	0.140256	1566850	14.0256	867
PFDN2 PFD2 HSPC231	7	0.189535	1.55515e+06	18.9535	868
GSTT1	5	0.349705	1.55137e+06	34.9705	869
ACTBL2	7	0.21552	1.53664e+06	21.552	870
WIF1 UNQ191/PRO217	8	0.29333	1.52965e+06	29.333	871
DQX1	4	0.194491	1528800	19.4491	872
COL21A1 COL1AL FP633	6	0.204218	1.52835e+06	20.4218	873
PTPN6 HCP PTP1C	6	0.999571	1.52087e+06	99.9571	874
MFGE8	6	0.334808	1.51918e+06	33.4808	875
EIF4ENIF1	7	0.10376	1.51743e+06	10.376	876
FAM114A1 NOXP20	8	0.0426658	1.5171e+06	4.26658	877
OTC	5	0.765116	1.51704e+06	76.5116	878
ANKRD34A ANKRD34	6	0.356324	1.51687e+06	35.6324	879
LAMA5 KIAA0533 KIAA1907	8	0.0458401	1.51542e+06	4.58401	880
PODN SLRR5A UNQ293/PRO332	5	0.208406	1.50636e+06	20.8406	881
PDIA2 PDIP	8	0.128793	1.49997e+06	12.8793	882
CAND2 KIAA0667 TIP120B	8	0.166114	1.49856e+06	16.6114	883
IGHV1-18	7	0.169102	1.49779e+06	16.9102	884
SRSF3 SFRS3 SRP20	6	0.21099	1.49753e+06	21.099	885
PHB2 BAP REA	4	0.259539	1.49335e+06	25.9539	886
SPC24 SPBC24	4	0.317966	1.49222e+06	31.7966	887
ITLN1 INTL ITLN LFR UNQ640/PRO1270	4	0.236178	1483535	23.6178	888
WDR12	8	0.231106	1.47635e+06	23.1106	889
LARP7 HDCMA18P	8	0.0849532	1.47629e+06	8.49532	890
UBTF UBF UBF1	8	0.145146	1.47116e+06	14.5146	891
SAA4 CSAA	8	0.253332	1.47023e+06	25.3332	892
KCTD12 C13orf2 KIAA1778 PFET1	8	0.304095	1.4682e+06	30.4095	893
FNBP1 FBP17 KIAA0554	4	0.466038	1.46531e+06	46.6038	894
PRSS2 TRY2 TRYP2	6	0.4575	1.45965e+06	45.75	895
C9	8	0.234042	1.45807e+06	23.4042	896
EIF3J EIF3S1 PRO0391	7	0.217618	1.45709e+06	21.7618	897
BCHE CHE1	8	0.411141	1.45507e+06	41.1141	898
PGM1	7	0.43461	1.45356e+06	43.461	899
IGLV3-25	5	0.542958	1.45297e+06	54.2958	900
PRB3	8	0.710662	1.44613e+06	71.0662	901
IGLV9-49	7	0.372368	1.43063e+06	37.2368	902
GCLC GLCL GLCLC	7	0.105354	1.41907e+06	10.5354	903
SHC1 SHC SHCA	4	0.182962	1.41276e+06	18.2962	904
SIN3A	6	0.577023	1.41023e+06	57.7023	905
TYMP ECGF1	7	0.252441	1.40626e+06	25.2441	906
MYH2 MYHSA2	8	0.11545	1405520	11.545	907
TEP1 TLP1 TP1	5	0.366571	1.39739e+06	36.6571	908
WDR43 KIAA0007 UTP5	4	0.40662	1.39524e+06	40.662	909
TCIRG1 ATP6N1C ATP6V0A3	8	0.034546	1.39349e+06	3.4546	910
PNP NP	6	0.368273	1.388e+06	36.8273	911
TBPL1 TLF TLP TLP21 TRF2 TRP	4	0.35523	1.38651e+06	35.523	912
ERBB3 HER3	5	0.482041	1.38049e+06	48.2041	913
UBE2V2 MMS2 UEV2	5	0.688798	1.37933e+06	68.8798	914
SESTD1 SOLO	4	0.437415	1.37758e+06	43.7415	915
F10	8	0.474073	1.37643e+06	47.4073	916
GCN1 GCN1L1 KIAA0219	5	0.191049	1.36907e+06	19.1049	917
USP9Y DFFRY	8	0.0593197	1.36358e+06	5.93197	918
ALDH3A2 ALDH10 FALDH	4	0.349545	1.36272e+06	34.9545	919
WARS1 IFI53 WARS WRS	8	0.154928	1.35976e+06	15.4928	920
GRK2 ADRBK1 BARK BARK1	8	0.151426	1.35415e+06	15.1426	921
TBCD KIAA0988 SSD1 TFCD PP1096	7	0.230841	1.33022e+06	23.0841	922
RSF1 HBXAP XAP8	8	0.10324	1.32705e+06	10.324	923
CRYZ	6	0.407363	1.32651e+06	40.7363	924
LMF2 TMEM112B TMEM153	8	0.0831205	1322415	8.31205	925
NMNAT1 NMNAT	8	0.146864	1.32177e+06	14.6864	926
SERPIND1 HCF2	8	0.33176	1.30153e+06	33.176	927
VWF F8VWF	8	0.416148	1.29761e+06	41.6148	928
IGLV6-57	7	0.256118	1.29352e+06	25.6118	929
CLMN KIAA1188	8	0.367718	1.28839e+06	36.7718	930
AP2A1 ADTAA CLAPA1	6	0.47404	1.28802e+06	47.404	931
IPO5 KPNB3 RANBP5	5	0.391778	1.28566e+06	39.1778	932
CETP	4	5.06e-05	1.28515e+06	0.00506	933
EMILIN2	8	0.0473516	1.28354e+06	4.73516	934
NAT8 CML1 GLA TSC501	8	0.0364379	1.27604e+06	3.64379	935
AKAP17A CXYorf3 DXYS155E SFRS17A XE7	8	0.235393	1.27516e+06	23.5393	936
CDK11B CDC2L1 CDK11 PITSLREA PK58	8	0.130473	1.27402e+06	13.0473	937
DBI	5	0.263455	1.26737e+06	26.3455	938
HGFAC	8	0.344341	1.26639e+06	34.4341	939
DNAJB6 HSJ2 MRJ MSJ1	5	0.405212	1.26484e+06	40.5212	940
NT5C3A NT5C3 P5N1 UMPH1 HSPC233	4	1.006	1257255	100.6	941
SELL LNHR LYAM1	8	0.270897	1.25531e+06	27.0897	942
RAB34 RAB39 RAH	4	0.269198	1.25037e+06	26.9198	943
SNX5	4	0.406088	1.24811e+06	40.6088	944
TNKS1BP1 KIAA1741 TAB182	8	0.00630227	1.24629e+06	0.630227	945
SLC9A6 KIAA0267 NHE6	5	0.597812	1.24435e+06	59.7812	946
FBN1 FBN	8	0.203208	1.24215e+06	20.3208	947
S100A7 PSOR1 S100A7C	4	1.00991	1.23166e+06	100.991	948
PCYT1A CTPCT PCYT1	7	0.37061	1.22852e+06	37.061	949
SNX9 SH3PX1 SH3PXD3A	8	0.164574	1.22688e+06	16.4574	950
F9	7	0.545435	1.22426e+06	54.5435	951
UBE4A KIAA0126	6	0.212246	1.22377e+06	21.2246	952
TOMM20 KIAA0016	4	0.195127	1.22363e+06	19.5127	953
ZG16B UNQ773/PRO1567	8	0.0825295	1.21436e+06	8.25295	954
EVI2B EVDB	7	0.634046	1.21428e+06	63.4046	955
CSTF1	4	0.695385	1.21218e+06	69.5385	956
SAA1	8	0.0998302	1.212e+06	9.98302	957
TIMM17B TIM17B JM3	4	0.461614	1.21007e+06	46.1614	958
SLC16A2 MCT8 XPCT	5	0.183761	1.2061e+06	18.3761	959
MANBA MANB1	8	0.269269	1.20576e+06	26.9269	960
DDOST KIAA0115 OST48 OK/SW-cl.45	7	0.0820886	1.20236e+06	8.20886	961
SERPINI2 MEPI PI14	6	0.218522	1.20018e+06	21.8522	962
CPB2	8	0.313418	1.19917e+06	31.3418	963
PLCH1 KIAA1069 PLCL3	4	0.294973	1.19652e+06	29.4973	964
PROS1 PROS	8	0.120347	1.1836e+06	12.0347	965
AHCY SAHH	5	0.304693	1.18337e+06	30.4693	966
MACROD1 LRP16	4	0.398889	1.17902e+06	39.8889	967
IGKV6D-21	8	0.365472	1.17219e+06	36.5472	968
APOF	7	0.173507	1.17139e+06	17.3507	969
NOX1 MOX1 NOH1	4	0.227598	1.16815e+06	22.7598	970
IGLV3-21	8	0.300781	1.16765e+06	30.0781	971
LEPR DB OBR	5	0.192973	1.16539e+06	19.2973	972
KRT78 K5B KB40	4	0.236933	1.15273e+06	23.6933	973
IGHV1-69	8	0.257968	1.15054e+06	25.7968	974
CCS	6	0.924289	1.14819e+06	92.4289	975
MERTK MER	4	0.944055	1144759	94.4055	976
DMBT1 GP340	8	0.014201	1.14184e+06	1.4201	977
TRIP4 RQT4	8	0.133707	1.1369e+06	13.3707	978
HNRNPDL HNRPDL JKTBP	4	0.298521	1.13425e+06	29.8521	979
ERCC4 ERCC11 XPF	5	0.381373	1.13388e+06	38.1373	980
PKLR PK1 PKL	4	0.724934	1.12738e+06	72.4934	981
MAG GMA	5	0.786318	1.1236e+06	78.6318	982
HNRNPAB ABBP1 HNRPAB	8	0.298305	1.1232e+06	29.8305	983
MARK3 CTAK1 EMK2	8	0.943292	1.12176e+06	94.3292	984
GATM AGAT	6	0.988336	1.11422e+06	98.8336	985
IGHV3-64	8	0.352062	1.11402e+06	35.2062	986
SLC1A3 EAAT1 GLAST GLAST1	4	0.370477	1.10615e+06	37.0477	987
HSPA14 HSP60 HSP70L1	4	0.623862	1.09704e+06	62.3862	988
VPS36 C13orf9 EAP45 CGI-145	8	0.161307	1.08679e+06	16.1307	989
PRMT1 HMT2 HRMT1L2 IR1B4	6	0.423832	1.08443e+06	42.3832	990
GFAP	8	0.298636	1.08232e+06	29.8636	991
CPT1A CPT1	5	0.207876	1.08114e+06	20.7876	992
LCN2 HNL NGAL	7	0.422314	1.0784e+06	42.2314	993
SEPTIN8 KIAA0202 SEPT8	5	0.258228	1.07313e+06	25.8228	994
GNE GLCNE	6	0.40386	1.07244e+06	40.386	995
MASP1 CRARF CRARF1 PRSS5	8	0.302982	1.07116e+06	30.2982	996
ATP5F1D ATP5D	5	0.685082	1.06531e+06	68.5082	997
BCAS1 AIBC1 NABC1	4	0.361307	1.06468e+06	36.1307	998
TMEM43 UNQ2564/PRO6244	5	0.554188	1.05494e+06	55.4188	999
TPD52L2	8	0.38332	1.05483e+06	38.332	1000
P3H1 GROS1 LEPRE1 PSEC0109	8	0.143572	1.05402e+06	14.3572	1001
ABCC2 CMOAT CMOAT1 CMRP MRP2	8	0.222134	1.05391e+06	22.2134	1002
CPN1 ACBP	8	0.507693	1.05225e+06	50.7693	1003
RAB5C RABL	4	0.199329	1.04858e+06	19.9329	1004
NPM1 NPM	7	0.578438	1.04712e+06	57.8438	1005
COLEC12 CLP1 NSR2 SCARA4 SRCL	5	0.415848	1.04429e+06	41.5848	1006
LAMP1	4	0.992391	1.04398e+06	99.2391	1007
C6	7	0.259153	1.03943e+06	25.9153	1008
NMT1 NMT	6	0.513575	1.03676e+06	51.3575	1009
LIPF	5	0.186022	1.03206e+06	18.6022	1010
INPP5K PPS SKIP	6	0.429904	1.02934e+06	42.9904	1011
CNPY3 CTG4A ERDA5 PRAT4A TNRC5 HSPC084 UNQ1934/PRO4409	7	0.168563	1.02808e+06	16.8563	1012
FETUB	8	0.230082	1.02775e+06	23.0082	1013
PBLD MAWBP	6	0.298529	1.02009e+06	29.8529	1014
HADH HAD HAD1 HADHSC SCHAD	4	0.233401	1016867	23.3401	1015
WBP2	4	0.189241	1.01469e+06	18.9241	1016
SERPINB6 PI6 PTI	7	0.417685	1.01314e+06	41.7685	1017
LCAT	6	0.647721	1.00815e+06	64.7721	1018
POLR1E PAF53 PRAF1	4	0.810304	997596	81.0304	1019
CYP51A1 CYP51	7	0.396767	995464	39.6767	1020
BDH2 DHRS6 SDR15C1 UNQ6308/PRO20933	8	0.219546	994194	21.9546	1021
WRNIP1 WHIP	4	0.196353	984028	19.6353	1022
LEMD2	8	0.161244	983229	16.1244	1023
ITGB4	7	0.0647446	981968	6.47446	1024
FCN2 FCNL	8	0.210756	978743	21.0756	1025
JMJD6 KIAA0585 PSR PTDSR	8	0.0736823	976254	7.36823	1026
ARHGAP4 KIAA0131 RGC1 RHOGAP4	7	0.285619	973862	28.5619	1027
ADD2 ADDB	5	0.212733	965853	21.2733	1028
GNPDA1 GNPI HLN KIAA0060	6	0.494616	963279	49.4616	1029
P4HB ERBA2L PDI PDIA1 PO4DB	8	0.304007	961669	30.4007	1030
MSH3 DUC1 DUG	8	0.139051	960806	13.9051	1031
ANXA5 ANX5 ENX2 PP4	4	0.888562	960774	88.8562	1032
PKHD1L1	5	0.822809	953518	82.2809	1033
CPE	5	0.613881	951724	61.3881	1034
PPIA CYPA	4	0.477056	950356	47.7056	1035
LGALS3BP M2BP	8	0.306747	944738	30.6747	1036
CMPK1 CMK CMPK UCK UMK UMPK	8	0.576733	942624	57.6733	1037
LCN1 VEGP	6	0.828744	930336	82.8744	1038
ASMTL	5	0.371073	928937	37.1073	1039
KPNB1 NTF97	7	0.14213	924762	14.213	1040
PTAR1	6	0.228681	924079	22.8681	1041
SAMSN1 HACS1	4	0.39401	923995	39.401	1042
STARD10 SDCCAG28 CGI-52	4	0.295084	918861	29.5084	1043
C8A	4	0.307011	916748	30.7011	1044
CYP4F2	8	0.0763049	915482	7.63049	1045
NOS1	7	0.390375	912722	39.0375	1046
SPG11 KIAA1840	8	0.257078	905633	25.7078	1047
C2	8	0.234641	903334	23.4641	1048
IGLV1-40	7	0.317608	898019	31.7608	1049
SHROOM2 APXL	4	0.191985	891857	19.1985	1050
PIKFYVE KIAA0981 PIP5K3	8	0.0386065	881556	3.86065	1051
B3GNT8 B3GALT7 BGALT15	5	0.276166	875604	27.6166	1052
GSS	4	0.352727	875533	35.2727	1053
PDE5A PDE5	5	0.368433	869389	36.8433	1054
FBP1 FBP	5	0.457648	864364	45.7648	1055
GMEB1	4	0.19831	856480	19.831	1056
CDC42BPG DMPK2	7	0.0507302	856262	5.07302	1057
FCGBP	8	0.111834	855565	11.1834	1058
GNAQ GAQ	8	0.272585	849458	27.2585	1059
DPYD	5	0.95704	844430	95.704	1060
DTNB	7	0.0107532	841238	1.07532	1061
RPRD1A P15RS	6	0.406891	838858	40.6891	1062
ACOX3 BRCOX PRCOX	8	0.503335	831143	50.3335	1063
STT3A ITM1 TMC	8	0.0799041	830285	7.99041	1064
PON3	8	0.415687	829309	41.5687	1065
KRT4 CYK4	4	0.952446	828747	95.2446	1066
SLC12A4 KCC1	5	0.515081	826036	51.5081	1067
ADPGK PSEC0260	4	0.465517	813788	46.5517	1068
GBA GC GLUC	4	0.663073	805093	66.3073	1069
TKTL1 TKR TKT2	5	0.221665	801906	22.1665	1070
MASP2	7	0.345118	800889	34.5118	1071
SF3B4 SAP49	6	0.286541	800199	28.6541	1072
ERI3 PINT1 PRNPIP PRNPIP1	4	0.216473	797518	21.6473	1073
FLNB FLN1L FLN3 TABP TAP	6	0.384311	794909	38.4311	1074
IGHV1-24	8	0.235899	792529	23.5899	1075
TRADD	5	0.238171	790835	23.8171	1076
GIT1	7	0.435405	784783	43.5405	1077
MVP LRP	4	0.441326	784451	44.1326	1078
HNF4A HNF4 NR2A1 TCF14	7	0.202752	781724	20.2752	1079
TUBB TUBB5 OK/SW-cl.56	7	0.178075	780983	17.8075	1080
SPP1 BNSP OPN PSEC0156	6	0.482195	780544	48.2195	1081
RNPS1 LDC2	4	0.307845	777169	30.7845	1082
EARS2 KIAA1970	8	0.0153438	775715	1.53438	1083
IGLV3-10	7	0.587537	775566	58.7537	1084
PITHD1 C1orf128 AD039 HT014 PP603	8	0.0752975	773490	7.52975	1085
BTD	8	0.301011	772647	30.1011	1086
CHCHD3 MIC19 MINOS3	5	0.262235	770803	26.2235	1087
VASP	8	0.243063	770621	24.3063	1088
OSBPL5 KIAA1534 OBPH1 ORP5	8	0.0304813	755630	3.04813	1089
FKBP2 FKBP13	4	0.204633	755328	20.4633	1090
USP14 TGT	8	0.674774	752531	67.4774	1091
NDUFB4	5	0.230646	748938	23.0646	1092
VCAN CSPG2	5	0.653769	746350	65.3769	1093
H2AC20 H2AFQ HIST2H2AC	8	0.430897	745894	43.0897	1094
PRG4 MSF SZP	5	0.413595	738180	41.3595	1095
TLN2 KIAA0320	5	0.337683	737025	33.7683	1096
FIS1 TTC11 CGI-135	8	0.235245	736118	23.5245	1097
SLC25A13	7	0.0575246	733725	5.75246	1098
MCEMP1 C19orf59	8	0.0146849	733308	1.46849	1099
PDZK1IP1 MAP17	8	0.593756	728734	59.3756	1100
MRPL17 LIP2	6	0.412981	727883	41.2981	1101
FARP1 CDEP PLEKHC2	8	0.0467372	727703	4.67372	1102
DLG1	7	0.0890019	725424	8.90019	1103
CPB1 CPB PCPB	8	0.354802	724008	35.4802	1104
SYMPK SPK	4	0.23874	723886	23.874	1105
SECTM1 K12	4	0.492875	723626	49.2875	1106
ANXA9 ANX31	4	0.635565	722521	63.5565	1107
BICDL2 BICDR2 CCDC64B	6	0.472877	719982	47.2877	1108
FAT4 CDHF14 FATJ Nbla00548	6	0.538566	718737	53.8566	1109
CNTFR	8	0.101441	716879	10.1441	1110
AGR3 BCMP11 PDIA18 UNQ642/PRO1272	8	0.0873661	713450	8.73661	1111
RPS12	4	0.340595	711597	34.0595	1112
RARRES1 PEIG1 TIG1	4	0.516961	710952	51.6961	1113
DCD AIDD DSEP	8	0.0257165	709512	2.57165	1114
NOP58 NOL5 NOP5 HSPC120	6	0.782278	696247	78.2278	1115
OLFM1 NOE1 NOEL1	8	0.414807	694347	41.4807	1116
CRK	5	0.621207	692383	62.1207	1117
ACTN1	6	0.468107	691626	46.8107	1118
FDXR ADXR	8	0.0922532	688292	9.22532	1119
LAMA2 LAMM	5	0.434642	688091	43.4642	1120
FBLN1 PP213	7	0.253509	686319	25.3509	1121
PREPL KIAA0436	8	0.0978649	681140	9.78649	1122
ADGRL4 ELTD1 ETL UNQ202/PRO228	8	0.0735222	678637	7.35222	1123
NPLOC4 KIAA1499 NPL4	8	0.108817	675322	10.8817	1124
IGHV1-69D	5	0.415706	670017	41.5706	1125
FCN1 FCNM	4	0.595706	667993	59.5706	1126
BLMH	7	0.600117	655561	60.0117	1127
TXNIP VDUP1	6	0.191046	652092	19.1046	1128
PGPEP1 PGPI	5	0.439414	651190	43.9414	1129
ICAM1	6	0.598893	650839	59.8893	1130
SUPT5H SPT5 SPT5H	5	0.25086	648786	25.086	1131
PSMC5 SUG1	7	0.668185	648385	66.8185	1132
MYDGF C19orf10	4	0.809415	647900	80.9415	1133
ATG2A KIAA0404	7	0.631874	645905	63.1874	1134
HDAC6 KIAA0901 JM21	4	0.445936	643755	44.5936	1135
CELA3B ELA3B	8	0.207041	641145	20.7041	1136
IGHV1-69-2	7	0.490906	639192	49.0906	1137
ZNF512B KIAA1196	7	0.905695	639041	90.5695	1138
DPP4 ADCP2 CD26	5	0.243688	637999	24.3688	1139
USP7 HAUSP	5	0.75975	636450	75.975	1140
CBL CBL2 RNF55	4	0.854819	635345	85.4819	1141
AKR1B10 AKR1B11	7	0.424197	631682	42.4197	1142
EPCAM GA733-2 M1S2 M4S1 MIC18 TACSTD1 TROP1	6	0.337259	631506	33.7259	1143
YWHAG	4	0.740756	629443	74.0756	1144
ESD	7	0.39066	628660	39.066	1145
SERPINA7 TBG	7	0.201426	619279	20.1426	1146
EPS8L3 EPS8R3	4	0.920985	616542	92.0985	1147
LBP	8	0.165458	614027	16.5458	1148
NEFL NF68 NFL	4	0.602946	612435	60.2946	1149
PI16 CRISP9 PSPBP PSEC0164 UNQ289/PRO328	7	0.318236	612434	31.8236	1150
CILP UNQ602/PRO1188	4	0.513311	605010	51.3311	1151
BLVRB FLR	6	0.619462	604521	61.9462	1152
STRIP1 FAM40A KIAA1761	8	0.0948228	602033	9.48228	1153
OGN OIF SLRR3A	7	0.26705	600859	26.705	1154
DYNC1I2 DNCI2 DNCIC2	7	0.0195215	600426	1.95215	1155
ASPSCR1 ASPL RCC17 TUG UBXD9 UBXN9	4	0.243271	598491	24.3271	1156
CNDP1 CN1 CPGL2 UNQ1915/PRO4380	7	0.296746	595761	29.6746	1157
UTP15	6	0.70754	595530	70.754	1158
ARMCX1 ALEX1 AD032	8	0.170523	594014	17.0523	1159
ICAM2	8	0.458911	591357	45.8911	1160
IGFBP3 IBP3	5	0.633556	590424	63.3556	1161
CNST C1orf71	8	0.105916	588650	10.5916	1162
PGAM1 PGAMA CDABP0006	8	0.357105	588447	35.7105	1163
DHX34 DDX34 KIAA0134	4	0.189234	587345	18.9234	1164
EIF4E EIF4EL1 EIF4F	4	0.828826	586451	82.8826	1165
SP100	6	0.395672	584195	39.5672	1166
GGH	8	0.114651	579309	11.4651	1167
TACO1 CCDC44 PRO0477	8	0.179784	572677	17.9784	1168
DCAKD	5	0.181934	571834	18.1934	1169
SLC9A3R1 NHERF NHERF1	5	0.421426	569387	42.1426	1170
	4	0.353411	560986	35.3411	1171
S100A8 CAGA CFAG MRP8	4	0.337109	558918	33.7109	1172
DHX30 DDX30 KIAA0890	8	0.200368	557758	20.0368	1173
CEBPZ CBF2	8	0.00844158	555122	0.844158	1174
ADARB1 ADAR2 DRADA2 RED1	7	0.141565	554814	14.1565	1175
ELOVL1 SSC1 CGI-88	8	0.0879149	554074	8.79149	1176
TCOF1	4	1.00709	553106	100.709	1177
PTPRZ1 HTPZP2 PTPRZ PTPRZ2 PTPZ	5	0.744766	550950	74.4766	1178
QSOX1 QSCN6 UNQ2520/PRO6013	5	0.286751	549932	28.6751	1179
HRNR S100A18	5	0.389481	548382	38.9481	1180
PTK2B FAK2 PYK2 RAFTK	4	0.726573	547266	72.6573	1181
CCDC93	5	0.722766	546363	72.2766	1182
PIGR	7	0.0420777	545760	4.20777	1183
CORO1C CRN2 CRNN4	8	0.13229	543018	13.229	1184
HLA-A HLAA	7	0.300348	540361	30.0348	1185
NUP133	7	0.164956	537387	16.4956	1186
KBTBD11 CMLAP KIAA0711 KLHDC7C	7	0.0646838	536697	6.46838	1187
ANP32E	7	0.467667	533589	46.7667	1188
IGKV1D-8	8	0.251675	528495	25.1675	1189
PKM OIP3 PK2 PK3 PKM2	6	0.213992	525684	21.3992	1190
CARD9	8	0.309676	525225	30.9676	1191
CNP	8	0.0864235	523852	8.64235	1192
NAGK	5	0.651138	522486	65.1138	1193
CAVIN2 SDPR	8	0.0114113	520015	1.14113	1194
PIK3IP1 HGFL	6	0.293316	516845	29.3316	1195
MYH9	8	0.145372	514940	14.5372	1196
ASS1 ASS	5	0.246102	513963	24.6102	1197
SPTA1 SPTA	6	0.544639	513790	54.4639	1198
SCIN KIAA1905	7	0.302008	510539	30.2008	1199
HMGB2 HMG2	6	0.252916	506116	25.2916	1200
RHOG ARHG	4	0.664698	504500	66.4698	1201
PLTP	8	0.144272	502149	14.4272	1202
EIF4A2 DDX2B EIF4F	5	0.719095	501596	71.9095	1203
IGKV1-17	8	0.510175	501562	51.0175	1204
FPGT GFPP	5	0.326021	501312	32.6021	1205
S100A11 MLN70 S100C	6	0.495541	501132	49.5541	1206
MUC1 PUM	7	0.467561	499953	46.7561	1207
AKTIP FTS	8	0.0238599	499388	2.38599	1208
CPN2 ACBP	8	0.150979	499170	15.0979	1209
ASL	8	0.382446	498246	38.2446	1210
EPHX1 EPHX EPOX	8	0.0918112	496694	9.18112	1211
KRT73 K6IRS3 KB36 KRT6IRS3	7	0.325073	495350	32.5073	1212
LSP1 WP34	4	0.920052	492557	92.0052	1213
FLOT1	4	0.598799	486918	59.8799	1214
IGHV1-8	8	0.234317	484885	23.4317	1215
ITM2B BRI BRI2	8	0.0159703	482313	1.59703	1216
MYLK MLCK MLCK1 MYLK1	7	0.0523116	480628	5.23116	1217
S100P S100E	4	0.370437	479788	37.0437	1218
FCGR3A CD16A FCG3 FCGR3 IGFR3	8	0.123534	478449	12.3534	1219
GNAT3	8	0.508139	477837	50.8139	1220
FCN3 FCNH HAKA1	8	0.101495	477163	10.1495	1221
C4BPB	8	0.468627	474441	46.8627	1222
FERMT2 KIND2 MIG2 PLEKHC1	4	0.595724	474052	59.5724	1223
CA1	7	0.559211	473542	55.9211	1224
RNASEH2C AYP1	8	0.24977	471607	24.977	1225
CADM3 IGSF4B NECL1 SYNCAM3 TSLL1 UNQ225/PRO258	4	0.874825	469047	87.4825	1226
ADIPOQ ACDC ACRP30 APM1 GBP28	8	0.00570642	467677	0.570642	1227
CTBS CTB	8	0.0626817	466295	6.26817	1228
ATP13A1 ATP13A KIAA1825 CGI-152	7	0.11311	462513	11.311	1229
XPOT	4	0.207077	459900	20.7077	1230
PLBD2	8	0.293166	459185	29.3166	1231
SAMD9L C7orf6 DRIF2 KIAA2005 UEF	4	0.546519	451412	54.6519	1232
RPS6 OK/SW-cl.2	4	0.462361	448671	46.2361	1233
PLXNB2 KIAA0315	4	0.484966	446595	48.4966	1234
HIBCH	5	0.521923	445530	52.1923	1235
PFN2	8	0.161388	443990	16.1388	1236
ETFDH	4	0.267282	443863	26.7282	1237
NPEPPS PSA	5	0.299969	441398	29.9969	1238
OPCML IGLON1 OBCAM	6	0.351737	441270	35.1737	1239
ZC3HAV1 ZC3HDC2 PRO1677	4	0.640132	440630	64.0132	1240
CST3	7	0.22157	439847	22.157	1241
GNS	7	0.463653	435602	46.3653	1242
INO80 INO80A INOC1 KIAA1259	7	0.657346	432255	65.7346	1243
KRT36 HHA6 HKA6 KRTHA6	7	0.287786	431805	28.7786	1244
HSPA4 APG2	4	0.643728	429206	64.3728	1245
PZP CPAMD6	8	0.309788	422254	30.9788	1246
PTPRM PTPRL1	7	0.483876	419672	48.3876	1247
F13A1 F13A	6	0.587337	414307	58.7337	1248
SRC SRC1	7	0.433478	408552	43.3478	1249
HSPA8 HSC70 HSP73 HSPA10	7	0.550625	408232	55.0625	1250
TXNDC17 TXNL5	5	0.466509	408096	46.6509	1251
NCBP1 CBP80 NCBP	6	0.399748	404747	39.9748	1252
IGLV3-27	6	0.730139	404724	73.0139	1253
FUS TLS	4	0.533785	404311	53.3785	1254
H6PD GDH	5	0.736013	403931	73.6013	1255
IGHV3-9	8	0.056526	399837	5.6526	1256
SHBG	7	0.721887	398362	72.1887	1257
C5 CPAMD4	8	0.156523	394656	15.6523	1258
MMP7 MPSL1 PUMP1	6	0.0532333	387563	5.32333	1259
ARIH1 ARI MOP6 UBCH7BP HUSSY-27	5	0.70761	387357	70.761	1260
EPB41 E41P	8	0.167516	387304	16.7516	1261
IGKV2D-29	8	0.754025	386925	75.4025	1262
GNAS GNAS1 GSP	8	0.0762183	383834	7.62183	1263
CHID1 GL008 PSEC0104 SB139	6	0.307307	381505	30.7307	1264
MAT2A AMS2 MATA2	8	0.0526153	378861	5.26153	1265
BLOC1S4 CNO	5	0.500992	377605	50.0992	1266
GCLM GLCLR	8	0.0578005	375883	5.78005	1267
SFPQ PSF	4	0.181009	375608	18.1009	1268
ZYX	8	0.0744463	375503	7.44463	1269
NEFM NEF3 NFM	7	0.773997	375312	77.3997	1270
PSMB4 PROS26	8	0.0285221	374030	2.85221	1271
DHX16 DBP2 DDX16 KIAA0577 PRP2	4	0.640604	372749	64.0604	1272
MYH3	7	0.122969	372276	12.2969	1273
PRKACA PKACA	5	0.262878	370533	26.2878	1274
RECK ST15	5	0.55542	369950	55.542	1275
TRAF2 TRAP3	4	0.261336	369739	26.1336	1276
F13B	8	0.18186	367645	18.186	1277
CD14	8	0.188581	366516	18.8581	1278
IGLV4-69	5	0.610051	366175	61.0051	1279
UBE2I UBC9 UBCE9	5	0.383239	363790	38.3239	1280
GP2	7	0.658994	363542	65.8994	1281
IGKV1D-17	8	0.244943	360931	24.4943	1282
ACE DCP DCP1	8	0.216363	360803	21.6363	1283
EMC1 KIAA0090 PSEC0263	7	0.426387	360480	42.6387	1284
CFD DF PFD	7	0.36187	357934	36.187	1285
RBM3 RNPL	5	0.648991	356637	64.8991	1286
CASR GPRC2A PCAR1	8	0.0823593	353724	8.23593	1287
RELN	6	0.666211	351721	66.6211	1288
UGT8 CGT UGT4	4	0.212315	350692	21.2315	1289
TBC1D5 KIAA0210	8	0.0819286	349676	8.19286	1290
KIF13B GAKIN KIAA0639	8	0.0645481	345468	6.45481	1291
ME1	7	0.16509	345429	16.509	1292
BMP1 PCOLC	4	0.51907	343644	51.907	1293
RNF123 KPC1 FP1477	6	0.335614	343157	33.5614	1294
ILF2 NF45 PRO3063	4	0.225036	337068	22.5036	1295
VTI1B VTI1 VTI1L VTI1L1 VTI2	8	0.136277	334941	13.6277	1296
HK1	7	0.177431	331766	17.7431	1297
ANXA2P2 ANX2L2 ANX2P2 LPC2B	7	0.0296699	328533	2.96699	1298
MVD MPD	8	0.151269	327878	15.1269	1299
KRT6B K6B KRTL1	7	0.213587	326195	21.3587	1300
SIPA1 SPA1	7	0.00137599	325714	0.137599	1301
PRKDC HYRC HYRC1	7	0.251648	325487	25.1648	1302
HSP90AB1 HSP90B HSPC2 HSPCB	8	0.364135	325172	36.4135	1303
SYNE2 KIAA1011 NUA	5	0.285957	323998	28.5957	1304
PCYOX1 KIAA0908 PCL1 UNQ597/PRO1183	8	0.224639	323411	22.4639	1305
CYBB NOX2	7	0.292454	322065	29.2454	1306
UMOD	5	0.381274	321565	38.1274	1307
PRR36	5	0.233302	321106	23.3302	1308
CADM1 IGSF4 IGSF4A NECL2 SYNCAM TSLC1	5	0.284166	317738	28.4166	1309
GBE1	4	0.376507	315355	37.6507	1310
GCNT3	4	0.226604	314887	22.6604	1311
HEG1 KIAA1237	7	0.0535988	313776	5.35988	1312
OLFM4 GW112 UNQ362/PRO698	8	0.0892583	313626	8.92583	1313
KIF2A KIF2 KNS2	8	0.0590636	311678	5.90636	1314
APOC4	7	0.231751	311031	23.1751	1315
PRRT3 UNQ5823/PRO19642	8	0.436473	310586	43.6473	1316
CFHR3 CFHL3 FHR3	7	0.377152	308112	37.7152	1317
APBB1 FE65 RIR	5	0.466961	307891	46.6961	1318
TNC HXB	8	0.310781	307032	31.0781	1319
RBM12B	4	0.323125	304732	32.3125	1320
PTMA TMSA	6	0.235287	301880	23.5287	1321
IGHV3-66	5	0.717721	301493	71.7721	1322
KRT1 KRTA	8	0.215457	300531	21.5457	1323
LMTK2 AATYK2 BREK KIAA1079 KPI2 LMR2	4	0.588609	297413	58.8609	1324
CEL BAL	8	0.127071	296456	12.7071	1325
F11	8	0.218112	294731	21.8112	1326
PAXX C9orf142 XLS	4	0.213849	294227	21.3849	1327
SERPINA10 ZPI UNQ707/PRO1358	8	0.312644	290243	31.2644	1328
PACS2 KIAA0602 PACS1L	4	0.668106	287246	66.8106	1329
CAPZB	4	0.361714	286580	36.1714	1330
TGFBI BIGH3	8	0.236672	283605	23.6672	1331
SELENBP1 SBP	7	0.267865	282570	26.7865	1332
CRISP3	8	0.0767521	282319	7.67521	1333
TMEM198	7	0.719868	282025	71.9868	1334
PRDX2 NKEFB TDPX1	8	0.145688	280110	14.5688	1335
ITGA2B GP2B ITGAB	6	0.415725	277972	41.5725	1336
CFI IF	6	0.248113	275466	24.8113	1337
AZU1	7	0.624262	273986	62.4262	1338
CPA4 CPA3 UNQ694/PRO1339	4	0.653101	272095	65.3101	1339
CAPZA1	7	0.0957355	271720	9.57355	1340
CRP PTX1	7	0.180599	270833	18.0599	1341
RBMX HNRPG RBMXP1	4	0.959306	270067	95.9306	1342
B2M CDABP0092 HDCMA22P	8	0.558521	266424	55.8521	1343
EHBP1 KIAA0903 NACSIN	4	0.257266	265789	25.7266	1344
AARS2 AARSL KIAA1270	5	0.372534	265752	37.2534	1345
CFHR5 CFHL5 FHR5	6	0.264146	264812	26.4146	1346
IGKV1-8	8	0.349333	262999	34.9333	1347
YLPM1 C14orf170 ZAP3	7	0.446052	258391	44.6052	1348
CNPY2 MSAP TMEM4 ZSIG9 UNQ1943/PRO4426	8	0.0810016	254474	8.10016	1349
UBA7 UBE1L UBE2	6	0.469151	254296	46.9151	1350
SORBS3 SCAM1	4	0.552212	251710	55.2212	1351
IMPA1 IMPA	5	0.519182	250423	51.9182	1352
ANKIB1 KIAA1386	8	0.203677	249998	20.3677	1353
ZBTB20 DPZF ZNF288	4	0.269165	248157	26.9165	1354
SEC61A1 SEC61A	5	0.383273	243932	38.3273	1355
MYG1 C12orf10	7	0.0612713	242155	6.12713	1356
TUBA4A TUBA1	8	0.342518	238973	34.2518	1357
HBG2	4	0.422737	238958	42.2737	1358
SRGAP2 ARHGAP34 FNBP2 KIAA0456 SRGAP2A	8	0.169574	237728	16.9574	1359
ATAT1 C6orf134 MEC17 Nbla00487	6	0.285612	236604	28.5612	1360
PAPLN UNQ2420/PRO4977	4	0.978626	233158	97.8626	1361
DENND4C C9orf55 C9orf55B	8	0.0767473	232078	7.67473	1362
NELL2 NRP2	8	0.0602583	230714	6.02583	1363
LAMA4	6	0.730391	228702	73.0391	1364
CCDC6 D10S170 TST1	4	0.2937	227493	29.37	1365
SERPINB9 PI9	8	0.154084	227348	15.4084	1366
LSM8	4	0.310085	224584	31.0085	1367
HIF1AN FIH1	4	0.567013	221247	56.7013	1368
CUTA ACHAP C6orf82	7	0.233225	220625	23.3225	1369
PFN1	8	0.939063	219735	93.9063	1370
DSC3 CDHF3 DSC4	4	0.356794	219583	35.6794	1371
MST1 D3F15S2 DNF15S2 HGFL	7	0.823781	219095	82.3781	1372
ILVBL AHAS HACL2	4	0.243476	219008	24.3476	1373
KRT20	8	0.0974576	218718	9.74576	1374
NUP205 C7orf14 KIAA0225	4	0.556652	218716	55.6652	1375
NCSTN KIAA0253 UNQ1874/PRO4317	4	0.998409	217852	99.8409	1376
KRT77 KRT1B	6	0.40089	216756	40.089	1377
KRT75 K6HF KB18	8	0.497734	215523	49.7734	1378
PDHB PHE1B	7	0.220178	213315	22.0178	1379
KTN1 CG1 KIAA0004	4	0.253948	212506	25.3948	1380
ACTR2 ARP2	4	0.733474	209955	73.3474	1381
PROC	8	0.599439	209897	59.9439	1382
CPA2	5	0.583808	209114	58.3808	1383
WASHC2A FAM21A FAM21B	8	0.0507566	203933	5.07566	1384
TUBA1B	6	0.535743	199760	53.5743	1385
MAPK1 ERK2 PRKM1 PRKM2	6	0.508119	199209	50.8119	1386
APLP2 APPL2	5	0.977608	197238	97.7608	1387
SLC13A2 NADC1 SDCT1	4	0.550381	196790	55.0381	1388
C2CD5 CDP138 KIAA0528	5	0.533516	196102	53.3516	1389
GAPDH GAPD CDABP0047 OK/SW-cl.12	8	0.167098	194820	16.7098	1390
PGLS	8	0.0598182	193274	5.98182	1391
TFRC	8	0.410956	191357	41.0956	1392
APMAP C20orf3 UNQ1869/PRO4305	7	0.26538	189777	26.538	1393
FZD6	4	0.931605	185028	93.1605	1394
YWHAQ	8	0.256775	184749	25.6775	1395
RETSAT PPSIG UNQ439/PRO872	5	0.308059	182362	30.8059	1396
UBAP2L KIAA0144 NICE4	5	0.83552	177834	83.552	1397
FBP2	4	0.537282	177706	53.7282	1398
PSMC4 MIP224 TBP7	5	0.378483	177575	37.8483	1399
DBH	8	0.399996	177456	39.9996	1400
PTGDS PDS	5	0.601883	177294	60.1883	1401
GLS GLS1 KIAA0838	4	0.992646	177011	99.2646	1402
NEO1 IGDCC2 NGN	8	0.130493	176474	13.0493	1403
AKAP9 AKAP350 AKAP450 KIAA0803	7	0.815157	173203	81.5157	1404
FBXO4 FBX4	5	0.634362	168787	63.4362	1405
LGALS1	4	0.754479	168671	75.4479	1406
NRXN2 KIAA0921	4	0.486472	167643	48.6472	1407
CNOT11 C2orf29 C40	5	0.256199	166780	25.6199	1408
AAK1 KIAA1048	8	0.14448	166264	14.448	1409
HEXB HCC7	4	0.19035	165838	19.035	1410
CLEC3B TNA	8	0.348046	164678	34.8046	1411
RIMBP2 KIAA0318 RBP2	4	0.364737	163411	36.4737	1412
PIP GCDFP15 GPIP4	8	0.146652	160983	14.6652	1413
PTPRG PTPG	7	0.373859	160812	37.3859	1414
LNPK KIAA1715 LNP	5	0.226109	158687	22.6109	1415
HSDL2 C9orf99 SDR13C1	4	0.207164	157807	20.7164	1416
HABP2 HGFAL PHBP	4	0.238582	157650	23.8582	1417
TMBIM1 LFG3 RECS1 PP1201 PSEC0158	4	0.634846	157569	63.4846	1418
GPD1	4	0.599264	154479	59.9264	1419
CDH6	8	0.0386101	153916	3.86101	1420
ANGPTL3 ANGPT5 UNQ153/PRO179	6	0.263745	151388	26.3745	1421
DNAJC5 CLN4	6	0.517135	150840	51.7135	1422
PSMD9	6	0.278751	150195	27.8751	1423
GIT2 KIAA0148	5	0.385002	148865	38.5002	1424
PSMD11	4	0.390139	148760	39.0139	1425
DDX18 cPERP-D	5	0.408269	148510	40.8269	1426
ANTXR2 CMG2	4	0.196871	146386	19.6871	1427
HLA-B HLAB	7	0.400125	145987	40.0125	1428
HYAL1 LUCA1	7	0.408264	145902	40.8264	1429
TFPI LACI TFPI1	8	0.592495	142409	59.2495	1430
SULT1C2 SULT1C1	5	0.919354	141382	91.9354	1431
GP1BA	7	0.858003	141151	85.8003	1432
H2BC12 H2BFT HIRIP1 HIST1H2BK	6	0.457631	137864	45.7631	1433
VSIG4 CRIg Z39IG UNQ317/PRO362	7	0.139231	137390	13.9231	1434
OSBPL11 ORP11 OSBP12	4	0.474143	135586	47.4143	1435
PRDX6 AOP2 KIAA0106	4	0.785978	135040	78.5978	1436
IGLV5-45	7	0.482039	134361	48.2039	1437
LDHB	4	0.415932	132330	41.5932	1438
LYVE1 CRSBP1 HAR XLKD1 UNQ230/PRO263	7	0.433311	131660	43.3311	1439
EPS15 AF1P	8	0.136164	131291	13.6164	1440
RRAS	4	0.809101	128637	80.9101	1441
ZNF292 KIAA0530	8	0.167761	127466	16.7761	1442
CPNE8	8	0.120951	127142	12.0951	1443
IGHV2-5	8	0.165779	126898	16.5779	1444
TBK1 NAK	4	0.190837	125369	19.0837	1445
BAAT	4	0.313837	124162	31.3837	1446
MBL2 COLEC1 MBL	7	0.621656	115312	62.1656	1447
THBS1 TSP TSP1	8	0.188948	112799	18.8948	1448
RAB14	8	0.114454	110628	11.4454	1449
CGREF1 CGR11	6	0.337395	110436	33.7395	1450
COL18A1	6	0.683171	109490	68.3171	1451
LCP1 PLS2	8	0.274898	107711	27.4898	1452
ICOSLG B7H2 B7RP1 ICOSL KIAA0653	8	0.330114	106967	33.0114	1453
NADK	4	0.471392	106060	47.1392	1454
CHGB SCG1	5	0.341464	105636	34.1464	1455
AP2B1 ADTB2 CLAPB1	5	0.866687	103479	86.6687	1456
PROCR EPCR	4	0.915352	103247	91.5352	1457
MGLL	4	0.611159	103078	61.1159	1458
PROZ	6	0.458385	100653	45.8385	1459
TOR4A C9orf167	4	0.347311	100280	34.7311	1460
MCAM MUC18	4	0.545888	95795.2	54.5888	1461
HSP90AA1 HSP90A HSPC1 HSPCA	8	0.586703	94597.7	58.6703	1462
CD36 GP3B GP4	8	0.042934	90828.8	4.2934	1463
CCDC126 UNQ786/PRO1605	7	0.284252	88206.3	28.4252	1464
COMP	8	0.365941	86881.2	36.5941	1465
HSPG2	7	0.179409	85954.3	17.9409	1466
CSF1	7	0.0834844	85477.8	8.34844	1467
HSPB11 C1orf41 IFT25 HSPC034	4	0.377464	84807.6	37.7464	1468
PARVB CGI-56	7	0.463871	83013	46.3871	1469
TRA2A	4	0.295003	81682.8	29.5003	1470
IGHV2-26	8	0.387373	80491.5	38.7373	1471
PHYKPL AGXT2L2 PP9286	8	0.136916	78373.7	13.6916	1472
MRPS25 RPMS25	7	0.4766	78204.7	47.66	1473
CD93 C1QR1 MXRA4	8	0.204008	67275	20.4008	1474
OAS3 P/OKcl.4	5	0.786311	64244.7	78.6311	1475
PLXDC1 TEM3 TEM7	7	0.510434	62393.7	51.0434	1476
EPRS1 EPRS GLNS PARS QARS QPRS PIG32	7	0.072901	61180	7.2901	1477
CAT	5	0.378729	60115.3	37.8729	1478
MTOR FRAP FRAP1 FRAP2 RAFT1 RAPT1	5	0.402356	56311.3	40.2356	1479
CNOT9 RCD1 RQCD1	4	0.261	53771.2	26.1	1480
LAMP2	5	0.545928	51988	54.5928	1481
KRT6A K6A KRT6D	7	0.398023	48390.5	39.8023	1482
AOC3 VAP1	8	0.143168	43716.7	14.3168	1483
KRT9	7	0.425995	39602.5	42.5995	1484
IGHE	5	0.319674	36330.1	31.9674	1485
DCPS DCS1 HINT5 HSPC015	8	0.0581026	34614.8	5.81026	1486
CAMP CAP18 FALL39 HSD26	7	0.218901	31953.6	21.8901	1487
ITGB3 GP3A	4	0.475534	31875.2	47.5534	1488
VCL	7	0.169991	23830.5	16.9991	1489

## Sheet: 5.Protein_CV_Compare
CV	Coefficient of Variation [%]	Type
5.06e-05	0.00506	STAVER
0.00137599	0.137599	STAVER
0.00151936	0.151936	STAVER
0.00293889	0.293889	STAVER
0.00442735	0.442735	STAVER
0.00570642	0.570642	STAVER
0.00630227	0.630227	STAVER
0.00705484	0.705484	STAVER
0.00844158	0.844158	STAVER
0.00871727	0.871727	STAVER
0.0089255	0.89255	STAVER
0.009281	0.928099	STAVER
0.00935168	0.935168	STAVER
0.0105987	1.05987	STAVER
0.0107532	1.07532	STAVER
0.0114113	1.14113	STAVER
0.0138575	1.38575	STAVER
0.0140089	1.40089	STAVER
0.014201	1.4201	STAVER
0.0146849	1.46849	STAVER
0.0147856	1.47856	STAVER
0.0151384	1.51384	STAVER
0.0153438	1.53438	STAVER
0.0157587	1.57587	STAVER
0.0159703	1.59703	STAVER
0.0174543	1.74543	STAVER
0.0179472	1.79472	STAVER
0.0182738	1.82738	STAVER
0.0191831	1.91831	STAVER
0.0194994	1.94994	STAVER
0.0195215	1.95215	STAVER
0.0209394	2.09394	STAVER
0.0211718	2.11718	STAVER
0.0238599	2.38599	STAVER
0.0257165	2.57165	STAVER
0.0279098	2.79098	STAVER
0.0285221	2.85221	STAVER
0.0286754	2.86754	STAVER
0.0289266	2.89266	STAVER
0.029531	2.9531	STAVER
0.0296108	2.96108	STAVER
0.0296699	2.96699	STAVER
0.0301075	3.01075	STAVER
0.0304813	3.04813	STAVER
0.0330755	3.30755	STAVER
0.0342083	3.42083	STAVER
0.034546	3.4546	STAVER
0.0364379	3.64379	STAVER
0.0386065	3.86065	STAVER
0.0386101	3.86101	STAVER
0.0389862	3.89862	STAVER
0.0397709	3.97709	STAVER
0.0409757	4.09757	STAVER
0.0420777	4.20777	STAVER
0.042427	4.2427	STAVER
0.0426658	4.26658	STAVER
0.042934	4.2934	STAVER
0.0440952	4.40952	STAVER
0.0458401	4.58401	STAVER
0.0462557	4.62557	STAVER
0.0467372	4.67372	STAVER
0.0473516	4.73516	STAVER
0.0499495	4.99495	STAVER
0.050625	5.0625	STAVER
0.0507302	5.07302	STAVER
0.0507566	5.07566	STAVER
0.0517976	5.17976	STAVER
0.0523116	5.23116	STAVER
0.0526153	5.26153	STAVER
0.0532333	5.32333	STAVER
0.0535988	5.35988	STAVER
0.056526	5.6526	STAVER
0.0575246	5.75246	STAVER
0.0576792	5.76792	STAVER
0.0578005	5.78005	STAVER
0.0578994	5.78994	STAVER
0.0581026	5.81026	STAVER
0.0590636	5.90636	STAVER
0.0593197	5.93197	STAVER
0.0596314	5.96314	STAVER
0.0598182	5.98182	STAVER
0.0602583	6.02583	STAVER
0.0602654	6.02654	STAVER
0.0612713	6.12713	STAVER
0.0626817	6.26817	STAVER
0.0629141	6.29141	STAVER
0.0629689	6.29689	STAVER
0.0633684	6.33684	STAVER
0.0645481	6.45481	STAVER
0.0646838	6.46838	STAVER
0.0647446	6.47446	STAVER
0.0659202	6.59202	STAVER
0.0659986	6.59986	STAVER
0.0681867	6.81867	STAVER
0.0689509	6.89509	STAVER
0.0702556	7.02556	STAVER
0.0719283	7.19283	STAVER
0.0728111	7.28111	STAVER
0.072901	7.2901	STAVER
0.0735222	7.35222	STAVER
0.0736823	7.36823	STAVER
0.0744463	7.44463	STAVER
0.0751757	7.51757	STAVER
0.0752975	7.52975	STAVER
0.0762183	7.62183	STAVER
0.0763049	7.63049	STAVER
0.0765453	7.65453	STAVER
0.0767206	7.67206	STAVER
0.0767473	7.67473	STAVER
0.0767521	7.67521	STAVER
0.0776974	7.76974	STAVER
0.0789182	7.89182	STAVER
0.0799041	7.99041	STAVER
0.0810016	8.10016	STAVER
0.0819286	8.19286	STAVER
0.0820886	8.20886	STAVER
0.0823593	8.23593	STAVER
0.0825295	8.25295	STAVER
0.0826812	8.26812	STAVER
0.0831205	8.31205	STAVER
0.0834844	8.34844	STAVER
0.0845773	8.45773	STAVER
0.0849037	8.49037	STAVER
0.0849532	8.49532	STAVER
0.0852441	8.52441	STAVER
0.0862758	8.62758	STAVER
0.0864235	8.64235	STAVER
0.0873661	8.73661	STAVER
0.0874078	8.74078	STAVER
0.0876448	8.76448	STAVER
0.0879149	8.79149	STAVER
0.0882457	8.82457	STAVER
0.0884313	8.84313	STAVER
0.0886316	8.86316	STAVER
0.0889063	8.89063	STAVER
0.0890019	8.90019	STAVER
0.0891031	8.91031	STAVER
0.0892583	8.92583	STAVER
0.0899711	8.99711	STAVER
0.0903486	9.03486	STAVER
0.091505	9.1505	STAVER
0.0918112	9.18112	STAVER
0.0922532	9.22532	STAVER
0.0922951	9.22951	STAVER
0.0941168	9.41168	STAVER
0.0942175	9.42175	STAVER
0.0948228	9.48228	STAVER
0.09531	9.531	STAVER
0.0957355	9.57355	STAVER
0.0974576	9.74576	STAVER
0.0978649	9.78649	STAVER
0.0983938	9.83938	STAVER
0.0993068	9.93068	STAVER
0.0993668	9.93668	STAVER
0.0998302	9.98302	STAVER
0.101441	10.1441	STAVER
0.101495	10.1495	STAVER
0.102557	10.2557	STAVER
0.102859	10.2859	STAVER
0.10324	10.324	STAVER
0.10376	10.376	STAVER
0.104251	10.4251	STAVER
0.105211	10.5211	STAVER
0.105354	10.5354	STAVER
0.105368	10.5368	STAVER
0.105828	10.5828	STAVER
0.105916	10.5916	STAVER
0.106836	10.6836	STAVER
0.107014	10.7014	STAVER
0.107422	10.7422	STAVER
0.108443	10.8443	STAVER
0.108606	10.8606	STAVER
0.108817	10.8817	STAVER
0.109299	10.9299	STAVER
0.111834	11.1834	STAVER
0.112711	11.2711	STAVER
0.112717	11.2717	STAVER
0.112769	11.2769	STAVER
0.11311	11.311	STAVER
0.113208	11.3208	STAVER
0.113616	11.3616	STAVER
0.113906	11.3906	STAVER
0.114454	11.4454	STAVER
0.114651	11.4651	STAVER
0.11545	11.545	STAVER
0.115764	11.5764	STAVER
0.11619	11.619	STAVER
0.117152	11.7152	STAVER
0.117869	11.7869	STAVER
0.119425	11.9425	STAVER
0.120347	12.0347	STAVER
0.120382	12.0382	STAVER
0.120622	12.0622	STAVER
0.120747	12.0747	STAVER
0.120951	12.0951	STAVER
0.121255	12.1255	STAVER
0.121286	12.1286	STAVER
0.122148	12.2148	STAVER
0.122312	12.2312	STAVER
0.122969	12.2969	STAVER
0.123173	12.3173	STAVER
0.123199	12.3199	STAVER
0.123425	12.3425	STAVER
0.123534	12.3534	STAVER
0.123677	12.3677	STAVER
0.123702	12.3702	STAVER
0.124029	12.4029	STAVER
0.124711	12.4711	STAVER
0.12477	12.477	STAVER
0.125199	12.5199	STAVER
0.125293	12.5293	STAVER
0.125489	12.5489	STAVER
0.127071	12.7071	STAVER
0.12759	12.759	STAVER
0.128507	12.8507	STAVER
0.128793	12.8793	STAVER
0.129518	12.9518	STAVER
0.130473	13.0473	STAVER
0.130493	13.0493	STAVER
0.130747	13.0747	STAVER
0.13229	13.229	STAVER
0.132939	13.2939	STAVER
0.133673	13.3673	STAVER
0.133707	13.3707	STAVER
0.13412	13.412	STAVER
0.134281	13.4281	STAVER
0.135082	13.5082	STAVER
0.135107	13.5107	STAVER
0.135155	13.5155	STAVER
0.135786	13.5786	STAVER
0.136164	13.6164	STAVER
0.136248	13.6248	STAVER
0.136277	13.6277	STAVER
0.136916	13.6916	STAVER
0.137594	13.7594	STAVER
0.137847	13.7847	STAVER
0.138681	13.8681	STAVER
0.139051	13.9051	STAVER
0.139158	13.9158	STAVER
0.139231	13.9231	STAVER
0.140256	14.0256	STAVER
0.140668	14.0668	STAVER
0.140787	14.0787	STAVER
0.141565	14.1565	STAVER
0.14213	14.213	STAVER
0.142255	14.2255	STAVER
0.143017	14.3017	STAVER
0.143168	14.3168	STAVER
0.143295	14.3295	STAVER
0.143571	14.3571	STAVER
0.143572	14.3572	STAVER
0.14362	14.362	STAVER
0.143634	14.3634	STAVER
0.14404	14.404	STAVER
0.144272	14.4272	STAVER
0.14448	14.448	STAVER
0.145146	14.5146	STAVER
0.145322	14.5322	STAVER
0.145372	14.5372	STAVER
0.145688	14.5688	STAVER
0.146054	14.6054	STAVER
0.146598	14.6598	STAVER
0.146652	14.6652	STAVER
0.146728	14.6728	STAVER
0.146864	14.6864	STAVER
0.146971	14.6971	STAVER
0.147418	14.7418	STAVER
0.147473	14.7473	STAVER
0.147605	14.7605	STAVER
0.147835	14.7835	STAVER
0.147921	14.7921	STAVER
0.148003	14.8003	STAVER
0.148379	14.8379	STAVER
0.149151	14.9151	STAVER
0.14973	14.973	STAVER
0.149881	14.9881	STAVER
0.150979	15.0979	STAVER
0.151269	15.1269	STAVER
0.151426	15.1426	STAVER
0.151775	15.1775	STAVER
0.152576	15.2576	STAVER
0.152596	15.2596	STAVER
0.152633	15.2633	STAVER
0.152847	15.2847	STAVER
0.152899	15.2899	STAVER
0.153163	15.3163	STAVER
0.153919	15.3919	STAVER
0.154084	15.4084	STAVER
0.154084	15.4084	STAVER
0.154099	15.4099	STAVER
0.154928	15.4928	STAVER
0.154941	15.4941	STAVER
0.154979	15.4979	STAVER
0.155133	15.5133	STAVER
0.155688	15.5688	STAVER
0.155726	15.5726	STAVER
0.156238	15.6238	STAVER
0.156523	15.6523	STAVER
0.156609	15.6609	STAVER
0.15662	15.662	STAVER
0.156756	15.6756	STAVER
0.157954	15.7954	STAVER
0.158115	15.8115	STAVER
0.158172	15.8172	STAVER
0.158535	15.8535	STAVER
0.158971	15.8971	STAVER
0.159408	15.9408	STAVER
0.159458	15.9458	STAVER
0.159564	15.9564	STAVER
0.160241	16.0241	STAVER
0.16069	16.069	STAVER
0.160864	16.0864	STAVER
0.16109	16.109	STAVER
0.161244	16.1244	STAVER
0.161307	16.1307	STAVER
0.161388	16.1388	STAVER
0.162299	16.2299	STAVER
0.16278	16.278	STAVER
0.16293	16.293	STAVER
0.163825	16.3825	STAVER
0.16434	16.434	STAVER
0.164574	16.4574	STAVER
0.164937	16.4937	STAVER
0.164956	16.4956	STAVER
0.16509	16.509	STAVER
0.16544	16.544	STAVER
0.165458	16.5458	STAVER
0.165493	16.5493	STAVER
0.165779	16.5779	STAVER
0.166114	16.6114	STAVER
0.166156	16.6156	STAVER
0.166374	16.6374	STAVER
0.16653	16.653	STAVER
0.167098	16.7098	STAVER
0.167516	16.7516	STAVER
0.167664	16.7664	STAVER
0.167731	16.7731	STAVER
0.167761	16.7761	STAVER
0.168563	16.8563	STAVER
0.168649	16.8649	STAVER
0.169102	16.9102	STAVER
0.169574	16.9574	STAVER
0.16996	16.996	STAVER
0.169991	16.9991	STAVER
0.170342	17.0342	STAVER
0.170359	17.0359	STAVER
0.170523	17.0523	STAVER
0.170937	17.0937	STAVER
0.171526	17.1526	STAVER
0.1719	17.19	STAVER
0.172137	17.2137	STAVER
0.172864	17.2864	STAVER
0.173143	17.3143	STAVER
0.173418	17.3418	STAVER
0.173507	17.3507	STAVER
0.173771	17.3771	STAVER
0.174252	17.4252	STAVER
0.174674	17.4674	STAVER
0.174711	17.4711	STAVER
0.175353	17.5353	STAVER
0.176864	17.6864	STAVER
0.177431	17.7431	STAVER
0.178075	17.8075	STAVER
0.178401	17.8401	STAVER
0.179113	17.9113	STAVER
0.179409	17.9409	STAVER
0.179784	17.9784	STAVER
0.179945	17.9945	STAVER
0.179999	17.9999	STAVER
0.180003	18.0003	STAVER
0.180599	18.0599	STAVER
0.18092	18.092	STAVER
0.181009	18.1009	STAVER
0.181342	18.1342	STAVER
0.181684	18.1684	STAVER
0.18186	18.186	STAVER
0.181934	18.1934	STAVER
0.182282	18.2282	STAVER
0.182672	18.2672	STAVER
0.182681	18.2681	STAVER
0.182962	18.2962	STAVER
0.183045	18.3045	STAVER
0.18339	18.339	STAVER
0.183761	18.3761	STAVER
0.184069	18.4069	STAVER
0.184762	18.4762	STAVER
0.184875	18.4875	STAVER
0.185436	18.5436	STAVER
0.186022	18.6022	STAVER
0.186031	18.6031	STAVER
0.186268	18.6268	STAVER
0.186861	18.6861	STAVER
0.187619	18.7619	STAVER
0.187935	18.7935	STAVER
0.188409	18.8409	STAVER
0.188581	18.8581	STAVER
0.188612	18.8612	STAVER
0.188755	18.8755	STAVER
0.188948	18.8948	STAVER
0.189234	18.9234	STAVER
0.189241	18.9241	STAVER
0.189535	18.9535	STAVER
0.190198	19.0198	STAVER
0.19035	19.035	STAVER
0.19045	19.045	STAVER
0.190612	19.0612	STAVER
0.190637	19.0637	STAVER
0.190717	19.0717	STAVER
0.190837	19.0837	STAVER
0.191046	19.1046	STAVER
0.191049	19.1049	STAVER
0.1911	19.11	STAVER
0.191303	19.1303	STAVER
0.191377	19.1377	STAVER
0.191648	19.1648	STAVER
0.191985	19.1985	STAVER
0.192055	19.2055	STAVER
0.192303	19.2303	STAVER
0.192459	19.2459	STAVER
0.192973	19.2973	STAVER
0.193145	19.3145	STAVER
0.193365	19.3365	STAVER
0.193616	19.3616	STAVER
0.193743	19.3743	STAVER
0.194295	19.4295	STAVER
0.194491	19.4491	STAVER
0.195047	19.5047	STAVER
0.195127	19.5127	STAVER
0.196353	19.6353	STAVER
0.196871	19.6871	STAVER
0.196872	19.6872	STAVER
0.196964	19.6964	STAVER
0.197077	19.7077	STAVER
0.197595	19.7595	STAVER
0.197663	19.7663	STAVER
0.197875	19.7875	STAVER
0.19821	19.821	STAVER
0.19831	19.831	STAVER
0.19901	19.901	STAVER
0.199183	19.9183	STAVER
0.199329	19.9329	STAVER
0.199823	19.9823	STAVER
0.199909	19.9909	STAVER
0.199966	19.9966	STAVER
0.200368	20.0368	STAVER
0.200481	20.0481	STAVER
0.200931	20.0931	STAVER
0.200997	20.0997	STAVER
0.201214	20.1214	STAVER
0.201426	20.1426	STAVER
0.20206	20.206	STAVER
0.202267	20.2267	STAVER
0.202752	20.2752	STAVER
0.203208	20.3208	STAVER
0.20324	20.324	STAVER
0.203677	20.3677	STAVER
0.203781	20.3781	STAVER
0.204008	20.4008	STAVER
0.204218	20.4218	STAVER
0.204441	20.4441	STAVER
0.204487	20.4487	STAVER
0.204509	20.4509	STAVER
0.204633	20.4633	STAVER
0.204974	20.4974	STAVER
0.205006	20.5006	STAVER
0.205419	20.5419	STAVER
0.206816	20.6816	STAVER
0.207041	20.7041	STAVER
0.207077	20.7077	STAVER
0.207164	20.7164	STAVER
0.207208	20.7208	STAVER
0.207876	20.7876	STAVER
0.207972	20.7972	STAVER
0.208007	20.8007	STAVER
0.208136	20.8136	STAVER
0.20838	20.838	STAVER
0.208406	20.8406	STAVER
0.208488	20.8488	STAVER
0.20852	20.852	STAVER
0.208685	20.8685	STAVER
0.208891	20.8891	STAVER
0.209037	20.9037	STAVER
0.20931	20.931	STAVER
0.209437	20.9437	STAVER
0.210756	21.0756	STAVER
0.21099	21.099	STAVER
0.211316	21.1316	STAVER
0.211755	21.1755	STAVER
0.211894	21.1894	STAVER
0.212246	21.2246	STAVER
0.212315	21.2315	STAVER
0.212423	21.2423	STAVER
0.212733	21.2733	STAVER
0.213257	21.3257	STAVER
0.213444	21.3444	STAVER
0.213587	21.3587	STAVER
0.213849	21.3849	STAVER
0.213992	21.3992	STAVER
0.214366	21.4366	STAVER
0.215064	21.5064	STAVER
0.215289	21.5289	STAVER
0.215379	21.5379	STAVER
0.215457	21.5457	STAVER
0.21552	21.552	STAVER
0.215976	21.5976	STAVER
0.216363	21.6363	STAVER
0.216451	21.6451	STAVER
0.216473	21.6473	STAVER
0.21688	21.688	STAVER
0.217618	21.7618	STAVER
0.218112	21.8112	STAVER
0.218522	21.8522	STAVER
0.218549	21.8549	STAVER
0.218588	21.8588	STAVER
0.218901	21.8901	STAVER
0.219546	21.9546	STAVER
0.220178	22.0178	STAVER
0.220198	22.0198	STAVER
0.220647	22.0647	STAVER
0.22157	22.157	STAVER
0.221665	22.1665	STAVER
0.22188	22.188	STAVER
0.222134	22.2134	STAVER
0.222306	22.2306	STAVER
0.22244	22.244	STAVER
0.222605	22.2605	STAVER
0.223994	22.3994	STAVER
0.224639	22.4639	STAVER
0.225034	22.5034	STAVER
0.225036	22.5036	STAVER
0.225236	22.5236	STAVER
0.225368	22.5368	STAVER
0.225594	22.5594	STAVER
0.225703	22.5703	STAVER
0.226109	22.6109	STAVER
0.226281	22.6281	STAVER
0.226488	22.6488	STAVER
0.226518	22.6518	STAVER
0.226604	22.6604	STAVER
0.226909	22.6909	STAVER
0.227598	22.7598	STAVER
0.22772	22.772	STAVER
0.228218	22.8218	STAVER
0.22853	22.853	STAVER
0.228681	22.8681	STAVER
0.229276	22.9276	STAVER
0.229349	22.9349	STAVER
0.229834	22.9834	STAVER
0.230082	23.0082	STAVER
0.230158	23.0158	STAVER
0.230254	23.0254	STAVER
0.230646	23.0646	STAVER
0.230841	23.0841	STAVER
0.231106	23.1106	STAVER
0.231398	23.1398	STAVER
0.231742	23.1742	STAVER
0.231751	23.1751	STAVER
0.232191	23.2191	STAVER
0.232236	23.2236	STAVER
0.23291	23.291	STAVER
0.233214	23.3214	STAVER
0.233225	23.3225	STAVER
0.233249	23.3249	STAVER
0.233302	23.3302	STAVER
0.233352	23.3352	STAVER
0.233401	23.3401	STAVER
0.23341	23.341	STAVER
0.234042	23.4042	STAVER
0.234317	23.4317	STAVER
0.234641	23.4641	STAVER
0.234711	23.4711	STAVER
0.234774	23.4774	STAVER
0.235245	23.5245	STAVER
0.235287	23.5287	STAVER
0.235393	23.5393	STAVER
0.235437	23.5437	STAVER
0.235568	23.5568	STAVER
0.235899	23.5899	STAVER
0.235923	23.5923	STAVER
0.235924	23.5924	STAVER
0.235973	23.5973	STAVER
0.236084	23.6084	STAVER
0.236178	23.6178	STAVER
0.236672	23.6672	STAVER
0.236933	23.6933	STAVER
0.237244	23.7244	STAVER
0.238014	23.8014	STAVER
0.238171	23.8171	STAVER
0.238457	23.8457	STAVER
0.238512	23.8512	STAVER
0.238582	23.8582	STAVER
0.23874	23.874	STAVER
0.239494	23.9494	STAVER
0.240464	24.0464	STAVER
0.241157	24.1157	STAVER
0.24155	24.155	STAVER
0.24176	24.176	STAVER
0.241856	24.1856	STAVER
0.243063	24.3063	STAVER
0.243271	24.3271	STAVER
0.243476	24.3476	STAVER
0.243688	24.3688	STAVER
0.244319	24.4319	STAVER
0.244943	24.4943	STAVER
0.245434	24.5434	STAVER
0.245464	24.5464	STAVER
0.24547	24.547	STAVER
0.246102	24.6102	STAVER
0.246189	24.6189	STAVER
0.246526	24.6526	STAVER
0.248113	24.8113	STAVER
0.249058	24.9058	STAVER
0.24977	24.977	STAVER
0.250229	25.0229	STAVER
0.250721	25.0721	STAVER
0.25086	25.086	STAVER
0.251648	25.1648	STAVER
0.251675	25.1675	STAVER
0.252441	25.2441	STAVER
0.252916	25.2916	STAVER
0.252991	25.2991	STAVER
0.253287	25.3287	STAVER
0.253332	25.3332	STAVER
0.253509	25.3509	STAVER
0.253628	25.3628	STAVER
0.253948	25.3948	STAVER
0.254435	25.4435	STAVER
0.254851	25.4851	STAVER
0.255156	25.5156	STAVER
0.255582	25.5582	STAVER
0.256118	25.6118	STAVER
0.256199	25.6199	STAVER
0.25661	25.661	STAVER
0.256775	25.6775	STAVER
0.257015	25.7015	STAVER
0.257078	25.7078	STAVER
0.257266	25.7266	STAVER
0.257419	25.7419	STAVER
0.257968	25.7968	STAVER
0.258228	25.8228	STAVER
0.259153	25.9153	STAVER
0.259531	25.9531	STAVER
0.259539	25.9539	STAVER
0.260242	26.0242	STAVER
0.260456	26.0456	STAVER
0.261	26.1	STAVER
0.261336	26.1336	STAVER
0.261459	26.1459	STAVER
0.26165	26.165	STAVER
0.262235	26.2235	STAVER
0.262878	26.2878	STAVER
0.26296	26.296	STAVER
0.263352	26.3352	STAVER
0.263455	26.3455	STAVER
0.263597	26.3597	STAVER
0.263745	26.3745	STAVER
0.264096	26.4096	STAVER
0.264105	26.4105	STAVER
0.264146	26.4146	STAVER
0.264174	26.4174	STAVER
0.264617	26.4617	STAVER
0.264854	26.4854	STAVER
0.265266	26.5266	STAVER
0.265354	26.5354	STAVER
0.26538	26.538	STAVER
0.266176	26.6176	STAVER
0.266486	26.6486	STAVER
0.266876	26.6876	STAVER
0.266908	26.6908	STAVER
0.266938	26.6938	STAVER
0.26705	26.705	STAVER
0.267086	26.7086	STAVER
0.267282	26.7282	STAVER
0.267428	26.7428	STAVER
0.267429	26.7429	STAVER
0.267865	26.7865	STAVER
0.268358	26.8358	STAVER
0.268604	26.8604	STAVER
0.268626	26.8626	STAVER
0.268851	26.8851	STAVER
0.268873	26.8873	STAVER
0.268988	26.8988	STAVER
0.269165	26.9165	STAVER
0.269198	26.9198	STAVER
0.269269	26.9269	STAVER
0.270337	27.0337	STAVER
0.270897	27.0897	STAVER
0.271448	27.1448	STAVER
0.271653	27.1653	STAVER
0.271785	27.1785	STAVER
0.271809	27.1809	STAVER
0.272091	27.2091	STAVER
0.272585	27.2585	STAVER
0.273245	27.3245	STAVER
0.273331	27.3331	STAVER
0.273404	27.3404	STAVER
0.274086	27.4086	STAVER
0.274334	27.4334	STAVER
0.274898	27.4898	STAVER
0.275379	27.5379	STAVER
0.275446	27.5446	STAVER
0.275666	27.5666	STAVER
0.276166	27.6166	STAVER
0.276313	27.6313	STAVER
0.276498	27.6498	STAVER
0.276532	27.6532	STAVER
0.276722	27.6722	STAVER
0.276769	27.6769	STAVER
0.276859	27.6859	STAVER
0.277801	27.7801	STAVER
0.278077	27.8077	STAVER
0.278125	27.8125	STAVER
0.278363	27.8363	STAVER
0.278412	27.8412	STAVER
0.278751	27.8751	STAVER
0.279939	27.9939	STAVER
0.281626	28.1626	STAVER
0.282074	28.2074	STAVER
0.282101	28.2101	STAVER
0.282526	28.2526	STAVER
0.284166	28.4166	STAVER
0.284252	28.4252	STAVER
0.285345	28.5345	STAVER
0.285612	28.5612	STAVER
0.285619	28.5619	STAVER
0.285957	28.5957	STAVER
0.286541	28.6541	STAVER
0.286751	28.6751	STAVER
0.287312	28.7312	STAVER
0.287786	28.7786	STAVER
0.288552	28.8552	STAVER
0.289453	28.9453	STAVER
0.290419	29.0419	STAVER
0.291515	29.1515	STAVER
0.292454	29.2454	STAVER
0.293166	29.3166	STAVER
0.293316	29.3316	STAVER
0.29333	29.333	STAVER
0.2937	29.37	STAVER
0.294017	29.4017	STAVER
0.294466	29.4466	STAVER
0.294658	29.4658	STAVER
0.294822	29.4822	STAVER
0.294863	29.4863	STAVER
0.294973	29.4973	STAVER
0.295003	29.5003	STAVER
0.295084	29.5084	STAVER
0.296069	29.6069	STAVER
0.29625	29.625	STAVER
0.296746	29.6746	STAVER
0.297337	29.7337	STAVER
0.297701	29.7701	STAVER
0.298305	29.8305	STAVER
0.298521	29.8521	STAVER
0.298529	29.8529	STAVER
0.298636	29.8636	STAVER
0.299111	29.9111	STAVER
0.299217	29.9217	STAVER
0.29957	29.957	STAVER
0.299717	29.9717	STAVER
0.299969	29.9969	STAVER
0.30006	30.006	STAVER
0.300348	30.0348	STAVER
0.300419	30.0419	STAVER
0.300426	30.0426	STAVER
0.300781	30.0781	STAVER
0.301011	30.1011	STAVER
0.301128	30.1128	STAVER
0.302008	30.2008	STAVER
0.30239	30.239	STAVER
0.302531	30.2531	STAVER
0.3026	30.26	STAVER
0.302982	30.2982	STAVER
0.303542	30.3542	STAVER
0.303994	30.3994	STAVER
0.304007	30.4007	STAVER
0.304095	30.4095	STAVER
0.30446	30.446	STAVER
0.304507	30.4507	STAVER
0.304693	30.4693	STAVER
0.304871	30.4871	STAVER
0.305156	30.5156	STAVER
0.30547	30.547	STAVER
0.305512	30.5512	STAVER
0.306747	30.6747	STAVER
0.307011	30.7011	STAVER
0.307307	30.7307	STAVER
0.307845	30.7845	STAVER
0.308003	30.8003	STAVER
0.308059	30.8059	STAVER
0.308222	30.8222	STAVER
0.308969	30.8969	STAVER
0.309169	30.9169	STAVER
0.309676	30.9676	STAVER
0.309788	30.9788	STAVER
0.30996	30.996	STAVER
0.310085	31.0085	STAVER
0.310772	31.0772	STAVER
0.310781	31.0781	STAVER
0.31091	31.091	STAVER
0.312374	31.2374	STAVER
0.312644	31.2644	STAVER
0.312979	31.2979	STAVER
0.313418	31.3418	STAVER
0.313837	31.3837	STAVER
0.314384	31.4384	STAVER
0.314569	31.4569	STAVER
0.31557	31.557	STAVER
0.316636	31.6636	STAVER
0.316864	31.6864	STAVER
0.317608	31.7608	STAVER
0.317947	31.7947	STAVER
0.317966	31.7966	STAVER
0.318236	31.8236	STAVER
0.318249	31.8249	STAVER
0.318579	31.8579	STAVER
0.319474	31.9474	STAVER
0.319674	31.9674	STAVER
0.320534	32.0534	STAVER
0.320616	32.0616	STAVER
0.321091	32.1091	STAVER
0.321563	32.1563	STAVER
0.321945	32.1945	STAVER
0.322776	32.2776	STAVER
0.323082	32.3082	STAVER
0.323125	32.3125	STAVER
0.323756	32.3756	STAVER
0.325043	32.5043	STAVER
0.325073	32.5073	STAVER
0.326021	32.6021	STAVER
0.326106	32.6106	STAVER
0.326723	32.6723	STAVER
0.327024	32.7024	STAVER
0.327287	32.7287	STAVER
0.327706	32.7706	STAVER
0.329043	32.9043	STAVER
0.329643	32.9643	STAVER
0.330114	33.0114	STAVER
0.330487	33.0487	STAVER
0.330609	33.0609	STAVER
0.331098	33.1098	STAVER
0.331608	33.1608	STAVER
0.33176	33.176	STAVER
0.334257	33.4257	STAVER
0.334808	33.4808	STAVER
0.335614	33.5614	STAVER
0.336901	33.6901	STAVER
0.337098	33.7098	STAVER
0.337109	33.7109	STAVER
0.337259	33.7259	STAVER
0.337395	33.7395	STAVER
0.337625	33.7625	STAVER
0.337635	33.7635	STAVER
0.337683	33.7683	STAVER
0.339483	33.9483	STAVER
0.339715	33.9715	STAVER
0.340244	34.0244	STAVER
0.340522	34.0522	STAVER
0.340595	34.0595	STAVER
0.341464	34.1464	STAVER
0.3416	34.16	STAVER
0.341713	34.1713	STAVER
0.342419	34.2419	STAVER
0.342518	34.2518	STAVER
0.34259	34.259	STAVER
0.34289	34.289	STAVER
0.343212	34.3212	STAVER
0.343273	34.3273	STAVER
0.344335	34.4335	STAVER
0.344341	34.4341	STAVER
0.344417	34.4417	STAVER
0.345118	34.5118	STAVER
0.345528	34.5528	STAVER
0.345607	34.5607	STAVER
0.345878	34.5878	STAVER
0.347311	34.7311	STAVER
0.348046	34.8046	STAVER
0.348169	34.8169	STAVER
0.348826	34.8826	STAVER
0.349214	34.9214	STAVER
0.349333	34.9333	STAVER
0.349379	34.9379	STAVER
0.349545	34.9545	STAVER
0.349705	34.9705	STAVER
0.350117	35.0117	STAVER
0.350367	35.0367	STAVER
0.35076	35.076	STAVER
0.351294	35.1294	STAVER
0.351563	35.1563	STAVER
0.351727	35.1727	STAVER
0.351737	35.1737	STAVER
0.352062	35.2062	STAVER
0.352466	35.2466	STAVER
0.352727	35.2727	STAVER
0.353411	35.3411	STAVER
0.354499	35.4499	STAVER
0.354802	35.4802	STAVER
0.355202	35.5202	STAVER
0.35523	35.523	STAVER
0.355304	35.5304	STAVER
0.356324	35.6324	STAVER
0.356794	35.6794	STAVER
0.356952	35.6952	STAVER
0.357105	35.7105	STAVER
0.357544	35.7544	STAVER
0.358068	35.8068	STAVER
0.3584	35.84	STAVER
0.358631	35.8631	STAVER
0.359414	35.9414	STAVER
0.359593	35.9593	STAVER
0.361307	36.1307	STAVER
0.361714	36.1714	STAVER
0.361729	36.1729	STAVER
0.361821	36.1821	STAVER
0.36187	36.187	STAVER
0.362331	36.2331	STAVER
0.363163	36.3163	STAVER
0.364135	36.4135	STAVER
0.36437	36.437	STAVER
0.364737	36.4737	STAVER
0.365472	36.5472	STAVER
0.365939	36.5939	STAVER
0.365941	36.5941	STAVER
0.366423	36.6423	STAVER
0.366571	36.6571	STAVER
0.36675	36.675	STAVER
0.367526	36.7526	STAVER
0.367718	36.7718	STAVER
0.368273	36.8273	STAVER
0.368433	36.8433	STAVER
0.368542	36.8542	STAVER
0.369022	36.9022	STAVER
0.370437	37.0437	STAVER
0.370477	37.0477	STAVER
0.37061	37.061	STAVER
0.371073	37.1073	STAVER
0.372368	37.2368	STAVER
0.372417	37.2417	STAVER
0.372534	37.2534	STAVER
0.373859	37.3859	STAVER
0.3739	37.39	STAVER
0.374049	37.4049	STAVER
0.374179	37.4179	STAVER
0.374479	37.4479	STAVER
0.374631	37.4631	STAVER
0.374734	37.4734	STAVER
0.374755	37.4755	STAVER
0.375456	37.5456	STAVER
0.375495	37.5495	STAVER
0.376507	37.6507	STAVER
0.377012	37.7012	STAVER
0.377152	37.7152	STAVER
0.377204	37.7204	STAVER
0.377464	37.7464	STAVER
0.377563	37.7563	STAVER
0.378483	37.8483	STAVER
0.378729	37.8729	STAVER
0.379743	37.9743	STAVER
0.379772	37.9772	STAVER
0.380184	38.0184	STAVER
0.381274	38.1274	STAVER
0.381373	38.1373	STAVER
0.382258	38.2258	STAVER
0.382446	38.2446	STAVER
0.383239	38.3239	STAVER
0.383273	38.3273	STAVER
0.38332	38.332	STAVER
0.383978	38.3978	STAVER
0.384311	38.4311	STAVER
0.385002	38.5002	STAVER
0.385198	38.5198	STAVER
0.385635	38.5635	STAVER
0.38662	38.662	STAVER
0.387146	38.7146	STAVER
0.387373	38.7373	STAVER
0.38738	38.738	STAVER
0.388549	38.8549	STAVER
0.389102	38.9102	STAVER
0.389481	38.9481	STAVER
0.390139	39.0139	STAVER
0.390375	39.0375	STAVER
0.390431	39.0431	STAVER
0.39066	39.066	STAVER
0.390896	39.0896	STAVER
0.391075	39.1075	STAVER
0.391778	39.1778	STAVER
0.391855	39.1855	STAVER
0.39401	39.401	STAVER
0.394536	39.4536	STAVER
0.39458	39.458	STAVER
0.395031	39.5031	STAVER
0.395672	39.5672	STAVER
0.396767	39.6767	STAVER
0.397941	39.7941	STAVER
0.398023	39.8023	STAVER
0.398889	39.8889	STAVER
0.399212	39.9212	STAVER
0.399334	39.9334	STAVER
0.399748	39.9748	STAVER
0.399906	39.9906	STAVER
0.399996	39.9996	STAVER
0.400013	40.0013	STAVER
0.400125	40.0125	STAVER
0.400657	40.0657	STAVER
0.40089	40.089	STAVER
0.401971	40.1971	STAVER
0.402356	40.2356	STAVER
0.40386	40.386	STAVER
0.404078	40.4078	STAVER
0.404304	40.4304	STAVER
0.404909	40.4909	STAVER
0.405212	40.5212	STAVER
0.405526	40.5526	STAVER
0.406088	40.6088	STAVER
0.40662	40.662	STAVER
0.406891	40.6891	STAVER
0.407304	40.7304	STAVER
0.407363	40.7363	STAVER
0.408142	40.8142	STAVER
0.408264	40.8264	STAVER
0.408269	40.8269	STAVER
0.409372	40.9372	STAVER
0.410119	41.0119	STAVER
0.410866	41.0866	STAVER
0.410956	41.0956	STAVER
0.411062	41.1062	STAVER
0.411141	41.1141	STAVER
0.41149	41.149	STAVER
0.411559	41.1559	STAVER
0.412981	41.2981	STAVER
0.413296	41.3296	STAVER
0.413595	41.3595	STAVER
0.414041	41.4041	STAVER
0.414807	41.4807	STAVER
0.415687	41.5687	STAVER
0.415706	41.5706	STAVER
0.415725	41.5725	STAVER
0.415848	41.5848	STAVER
0.415932	41.5932	STAVER
0.416055	41.6055	STAVER
0.416148	41.6148	STAVER
0.416178	41.6178	STAVER
0.416651	41.6651	STAVER
0.416681	41.6681	STAVER
0.417685	41.7685	STAVER
0.418994	41.8994	STAVER
0.419193	41.9193	STAVER
0.420117	42.0117	STAVER
0.420355	42.0355	STAVER
0.420729	42.0729	STAVER
0.421426	42.1426	STAVER
0.422314	42.2314	STAVER
0.422737	42.2737	STAVER
0.423265	42.3265	STAVER
0.423832	42.3832	STAVER
0.424197	42.4197	STAVER
0.425995	42.5995	STAVER
0.426387	42.6387	STAVER
0.426681	42.6681	STAVER
0.427299	42.7299	STAVER
0.429627	42.9627	STAVER
0.429904	42.9904	STAVER
0.430897	43.0897	STAVER
0.43103	43.103	STAVER
0.433311	43.3311	STAVER
0.433478	43.3478	STAVER
0.434023	43.4023	STAVER
0.43461	43.461	STAVER
0.434642	43.4642	STAVER
0.435024	43.5024	STAVER
0.435405	43.5405	STAVER
0.435511	43.5511	STAVER
0.436473	43.6473	STAVER
0.437415	43.7415	STAVER
0.439228	43.9228	STAVER
0.439414	43.9414	STAVER
0.439686	43.9686	STAVER
0.44015	44.015	STAVER
0.441326	44.1326	STAVER
0.442665	44.2665	STAVER
0.442872	44.2872	STAVER
0.443928	44.3928	STAVER
0.445007	44.5007	STAVER
0.44544	44.544	STAVER
0.445936	44.5936	STAVER
0.446052	44.6052	STAVER
0.447908	44.7908	STAVER
0.448263	44.8263	STAVER
0.449606	44.9606	STAVER
0.449666	44.9666	STAVER
0.450556	45.0556	STAVER
0.452411	45.2411	STAVER
0.452971	45.2971	STAVER
0.453426	45.3426	STAVER
0.45441	45.441	STAVER
0.455455	45.5455	STAVER
0.45579	45.579	STAVER
0.456673	45.6673	STAVER
0.4575	45.75	STAVER
0.457548	45.7548	STAVER
0.457631	45.7631	STAVER
0.457648	45.7648	STAVER
0.458385	45.8385	STAVER
0.458911	45.8911	STAVER
0.459029	45.9029	STAVER
0.459398	45.9398	STAVER
0.459733	45.9733	STAVER
0.460182	46.0182	STAVER
0.460434	46.0434	STAVER
0.461614	46.1614	STAVER
0.462361	46.2361	STAVER
0.463308	46.3308	STAVER
0.463653	46.3653	STAVER
0.463871	46.3871	STAVER
0.463945	46.3945	STAVER
0.464027	46.4027	STAVER
0.465331	46.5331	STAVER
0.465517	46.5517	STAVER
0.466038	46.6038	STAVER
0.466326	46.6326	STAVER
0.466327	46.6327	STAVER
0.466509	46.6509	STAVER
0.466961	46.6961	STAVER
0.467561	46.7561	STAVER
0.467667	46.7667	STAVER
0.468107	46.8107	STAVER
0.468627	46.8627	STAVER
0.469141	46.9141	STAVER
0.469151	46.9151	STAVER
0.471392	47.1392	STAVER
0.472877	47.2877	STAVER
0.47404	47.404	STAVER
0.474073	47.4073	STAVER
0.474143	47.4143	STAVER
0.475363	47.5363	STAVER
0.475419	47.5419	STAVER
0.47548	47.548	STAVER
0.475534	47.5534	STAVER
0.4766	47.66	STAVER
0.477056	47.7056	STAVER
0.47911	47.911	STAVER
0.479305	47.9305	STAVER
0.480009	48.0009	STAVER
0.48115	48.115	STAVER
0.481572	48.1572	STAVER
0.482039	48.2039	STAVER
0.482041	48.2041	STAVER
0.482155	48.2155	STAVER
0.482195	48.2195	STAVER
0.482603	48.2603	STAVER
0.483406	48.3406	STAVER
0.483876	48.3876	STAVER
0.484966	48.4966	STAVER
0.486472	48.6472	STAVER
0.486616	48.6616	STAVER
0.487472	48.7472	STAVER
0.490786	49.0786	STAVER
0.490906	49.0906	STAVER
0.49208	49.208	STAVER
0.492464	49.2464	STAVER
0.492875	49.2875	STAVER
0.494385	49.4385	STAVER
0.494616	49.4616	STAVER
0.495541	49.5541	STAVER
0.497105	49.7105	STAVER
0.497734	49.7734	STAVER
0.498604	49.8604	STAVER
0.500992	50.0992	STAVER
0.503276	50.3276	STAVER
0.503335	50.3335	STAVER
0.503386	50.3386	STAVER
0.505196	50.5196	STAVER
0.505309	50.5309	STAVER
0.507693	50.7693	STAVER
0.507997	50.7997	STAVER
0.508119	50.8119	STAVER
0.508139	50.8139	STAVER
0.508284	50.8284	STAVER
0.510094	51.0094	STAVER
0.510175	51.0175	STAVER
0.510396	51.0396	STAVER
0.510434	51.0434	STAVER
0.51169	51.169	STAVER
0.512835	51.2835	STAVER
0.513152	51.3152	STAVER
0.513311	51.3311	STAVER
0.513575	51.3575	STAVER
0.515081	51.5081	STAVER
0.516961	51.6961	STAVER
0.517135	51.7135	STAVER
0.517394	51.7394	STAVER
0.51907	51.907	STAVER
0.519182	51.9182	STAVER
0.521923	52.1923	STAVER
0.521933	52.1933	STAVER
0.522977	52.2977	STAVER
0.524192	52.4192	STAVER
0.525581	52.5581	STAVER
0.525733	52.5733	STAVER
0.526066	52.6066	STAVER
0.526798	52.6798	STAVER
0.527324	52.7324	STAVER
0.529168	52.9168	STAVER
0.531178	53.1178	STAVER
0.533516	53.3516	STAVER
0.533785	53.3785	STAVER
0.535743	53.5743	STAVER
0.536131	53.6131	STAVER
0.536182	53.6182	STAVER
0.537282	53.7282	STAVER
0.538477	53.8477	STAVER
0.538566	53.8566	STAVER
0.539569	53.9569	STAVER
0.541895	54.1895	STAVER
0.542209	54.2209	STAVER
0.542958	54.2958	STAVER
0.544639	54.4639	STAVER
0.545435	54.5435	STAVER
0.545888	54.5888	STAVER
0.545928	54.5928	STAVER
0.546443	54.6443	STAVER
0.546519	54.6519	STAVER
0.546738	54.6738	STAVER
0.54733	54.733	STAVER
0.547429	54.7429	STAVER
0.548121	54.8121	STAVER
0.548218	54.8218	STAVER
0.550381	55.0381	STAVER
0.550625	55.0625	STAVER
0.552212	55.2212	STAVER
0.554188	55.4188	STAVER
0.554496	55.4496	STAVER
0.554816	55.4816	STAVER
0.55542	55.542	STAVER
0.556652	55.6652	STAVER
0.558521	55.8521	STAVER
0.559211	55.9211	STAVER
0.559314	55.9314	STAVER
0.561039	56.1039	STAVER
0.561452	56.1452	STAVER
0.562405	56.2405	STAVER
0.566643	56.6643	STAVER
0.567013	56.7013	STAVER
0.56707	56.707	STAVER
0.568711	56.8711	STAVER
0.570136	57.0136	STAVER
0.573711	57.3711	STAVER
0.576638	57.6638	STAVER
0.576733	57.6733	STAVER
0.577023	57.7023	STAVER
0.577179	57.7179	STAVER
0.578438	57.8438	STAVER
0.582974	58.2974	STAVER
0.583808	58.3808	STAVER
0.586703	58.6703	STAVER
0.587063	58.7063	STAVER
0.587337	58.7337	STAVER
0.587537	58.7537	STAVER
0.588609	58.8609	STAVER
0.590515	59.0515	STAVER
0.591802	59.1802	STAVER
0.592495	59.2495	STAVER
0.592944	59.2944	STAVER
0.59322	59.322	STAVER
0.593756	59.3756	STAVER
0.595706	59.5706	STAVER
0.595724	59.5724	STAVER
0.596602	59.6602	STAVER
0.596893	59.6893	STAVER
0.597812	59.7812	STAVER
0.598799	59.8799	STAVER
0.598893	59.8893	STAVER
0.599264	59.9264	STAVER
0.599439	59.9439	STAVER
0.599951	59.9951	STAVER
0.600117	60.0117	STAVER
0.600391	60.0391	STAVER
0.600503	60.0503	STAVER
0.601883	60.1883	STAVER
0.602946	60.2946	STAVER
0.603446	60.3446	STAVER
0.607871	60.7871	STAVER
0.610051	61.0051	STAVER
0.611159	61.1159	STAVER
0.613881	61.3881	STAVER
0.615866	61.5866	STAVER
0.619462	61.9462	STAVER
0.619746	61.9746	STAVER
0.621207	62.1207	STAVER
0.621277	62.1277	STAVER
0.621656	62.1656	STAVER
0.622081	62.2081	STAVER
0.622198	62.2198	STAVER
0.623491	62.3491	STAVER
0.623862	62.3862	STAVER
0.623937	62.3937	STAVER
0.624262	62.4262	STAVER
0.624638	62.4638	STAVER
0.626212	62.6212	STAVER
0.626411	62.6411	STAVER
0.626975	62.6975	STAVER
0.627407	62.7407	STAVER
0.627863	62.7863	STAVER
0.629209	62.9209	STAVER
0.630309	63.0309	STAVER
0.631874	63.1874	STAVER
0.631893	63.1893	STAVER
0.632478	63.2478	STAVER
0.633319	63.3319	STAVER
0.633556	63.3556	STAVER
0.634031	63.4031	STAVER
0.634046	63.4046	STAVER
0.634362	63.4362	STAVER
0.634846	63.4846	STAVER
0.635565	63.5565	STAVER
0.635931	63.5931	STAVER
0.637378	63.7378	STAVER
0.637872	63.7872	STAVER
0.637892	63.7892	STAVER
0.63892	63.892	STAVER
0.640132	64.0132	STAVER
0.640604	64.0604	STAVER
0.642723	64.2723	STAVER
0.643728	64.3728	STAVER
0.644646	64.4646	STAVER
0.644795	64.4795	STAVER
0.647721	64.7721	STAVER
0.648991	64.8991	STAVER
0.651138	65.1138	STAVER
0.653101	65.3101	STAVER
0.653769	65.3769	STAVER
0.655135	65.5135	STAVER
0.65654	65.654	STAVER
0.657346	65.7346	STAVER
0.658994	65.8994	STAVER
0.663073	66.3073	STAVER
0.663758	66.3758	STAVER
0.664698	66.4698	STAVER
0.665381	66.5381	STAVER
0.666211	66.6211	STAVER
0.666944	66.6944	STAVER
0.668106	66.8106	STAVER
0.668185	66.8185	STAVER
0.669229	66.9229	STAVER
0.672349	67.2349	STAVER
0.673771	67.3771	STAVER
0.674774	67.4774	STAVER
0.677115	67.7115	STAVER
0.679025	67.9025	STAVER
0.679845	67.9845	STAVER
0.682879	68.2879	STAVER
0.683171	68.3171	STAVER
0.684807	68.4807	STAVER
0.685082	68.5082	STAVER
0.686886	68.6886	STAVER
0.688798	68.8798	STAVER
0.692677	69.2677	STAVER
0.695385	69.5385	STAVER
0.697561	69.7561	STAVER
0.701263	70.1263	STAVER
0.701719	70.1719	STAVER
0.705021	70.5021	STAVER
0.70736	70.736	STAVER
0.70754	70.754	STAVER
0.70761	70.761	STAVER
0.709635	70.9635	STAVER
0.710662	71.0662	STAVER
0.717721	71.7721	STAVER
0.719095	71.9095	STAVER
0.71967	71.967	STAVER
0.719868	71.9868	STAVER
0.72137	72.137	STAVER
0.721385	72.1385	STAVER
0.721887	72.1887	STAVER
0.722766	72.2766	STAVER
0.723607	72.3607	STAVER
0.724934	72.4934	STAVER
0.725698	72.5698	STAVER
0.726573	72.6573	STAVER
0.726709	72.6709	STAVER
0.730139	73.0139	STAVER
0.730337	73.0337	STAVER
0.730391	73.0391	STAVER
0.732706	73.2706	STAVER
0.733474	73.3474	STAVER
0.736013	73.6013	STAVER
0.737238	73.7238	STAVER
0.73997	73.997	STAVER
0.740756	74.0756	STAVER
0.744638	74.4638	STAVER
0.744703	74.4703	STAVER
0.744766	74.4766	STAVER
0.746504	74.6504	STAVER
0.747297	74.7297	STAVER
0.75006	75.006	STAVER
0.751458	75.1458	STAVER
0.752518	75.2518	STAVER
0.754025	75.4025	STAVER
0.754479	75.4479	STAVER
0.758145	75.8145	STAVER
0.759573	75.9573	STAVER
0.75975	75.975	STAVER
0.761008	76.1008	STAVER
0.761171	76.1171	STAVER
0.765116	76.5116	STAVER
0.765783	76.5783	STAVER
0.767306	76.7306	STAVER
0.768086	76.8086	STAVER
0.77282	77.282	STAVER
0.772867	77.2867	STAVER
0.773997	77.3997	STAVER
0.782067	78.2067	STAVER
0.782278	78.2278	STAVER
0.782974	78.2974	STAVER
0.785978	78.5978	STAVER
0.786311	78.6311	STAVER
0.786318	78.6318	STAVER
0.788281	78.8281	STAVER
0.791727	79.1727	STAVER
0.791897	79.1897	STAVER
0.792415	79.2415	STAVER
0.792787	79.2787	STAVER
0.797321	79.7321	STAVER
0.801679	80.1679	STAVER
0.805814	80.5814	STAVER
0.809101	80.9101	STAVER
0.809415	80.9415	STAVER
0.810304	81.0304	STAVER
0.815157	81.5157	STAVER
0.816944	81.6944	STAVER
0.817907	81.7907	STAVER
0.820591	82.0591	STAVER
0.822809	82.2809	STAVER
0.823781	82.3781	STAVER
0.828744	82.8744	STAVER
0.828826	82.8826	STAVER
0.831578	83.1578	STAVER
0.83552	83.552	STAVER
0.836884	83.6884	STAVER
0.841104	84.1104	STAVER
0.845947	84.5947	STAVER
0.847528	84.7528	STAVER
0.847808	84.7808	STAVER
0.854819	85.4819	STAVER
0.856169	85.6169	STAVER
0.858003	85.8003	STAVER
0.866687	86.6687	STAVER
0.867391	86.7391	STAVER
0.873176	87.3176	STAVER
0.873854	87.3854	STAVER
0.874825	87.4825	STAVER
0.877121	87.7121	STAVER
0.881611	88.1611	STAVER
0.888562	88.8562	STAVER
0.905695	90.5695	STAVER
0.913929	91.3929	STAVER
0.915352	91.5352	STAVER
0.919354	91.9354	STAVER
0.919717	91.9717	STAVER
0.920052	92.0052	STAVER
0.920985	92.0985	STAVER
0.924289	92.4289	STAVER
0.931605	93.1605	STAVER
0.939063	93.9063	STAVER
0.943292	94.3292	STAVER
0.943911	94.3911	STAVER
0.944055	94.4055	STAVER
0.94537	94.537	STAVER
0.946216	94.6216	STAVER
0.952446	95.2446	STAVER
0.95704	95.704	STAVER
0.959306	95.9306	STAVER
0.961928	96.1928	STAVER
0.962625	96.2625	STAVER
0.962893	96.2893	STAVER
0.964368	96.4368	STAVER
0.977608	97.7608	STAVER
0.978626	97.8626	STAVER
0.988336	98.8336	STAVER
0.992391	99.2391	STAVER
0.992646	99.2646	STAVER
0.998409	99.8409	STAVER
0.999571	99.9571	STAVER
1.0041	100.41	STAVER
1.006	100.6	STAVER
1.00709	100.709	STAVER
1.00768	100.768	STAVER
1.00991	100.991	STAVER
1.01986	101.986	STAVER
0.0235265	2.35265	Raw Data
0.0488596	4.88596	Raw Data
0.0617932	6.17932	Raw Data
0.0658832	6.58832	Raw Data
0.0679476	6.79476	Raw Data
0.0684895	6.84895	Raw Data
0.0699677	6.99677	Raw Data
0.0701772	7.01772	Raw Data
0.073914	7.3914	Raw Data
0.0749864	7.49864	Raw Data
0.0749864	7.49864	Raw Data
0.0770523	7.70523	Raw Data
0.0807167	8.07167	Raw Data
0.0825564	8.25564	Raw Data
0.0831169	8.31169	Raw Data
0.0848309	8.48309	Raw Data
0.0848309	8.48309	Raw Data
0.0860264	8.60264	Raw Data
0.0862735	8.62735	Raw Data
0.0866293	8.66293	Raw Data
0.0868676	8.68676	Raw Data
0.0869391	8.69391	Raw Data
0.0872801	8.72801	Raw Data
0.101007	10.1007	Raw Data
0.101627	10.1627	Raw Data
0.10229	10.229	Raw Data
0.103047	10.3047	Raw Data
0.103255	10.3255	Raw Data
0.10564	10.564	Raw Data
0.106012	10.6012	Raw Data
0.10613	10.613	Raw Data
0.106308	10.6308	Raw Data
0.107556	10.7556	Raw Data
0.108349	10.8349	Raw Data
0.110012	11.0012	Raw Data
0.110675	11.0675	Raw Data
0.110905	11.0905	Raw Data
0.112248	11.2248	Raw Data
0.113557	11.3557	Raw Data
0.114694	11.4694	Raw Data
0.117885	11.7885	Raw Data
0.118564	11.8564	Raw Data
0.119942	11.9942	Raw Data
0.120516	12.0516	Raw Data
0.12092	12.092	Raw Data
0.122272	12.2272	Raw Data
0.122767	12.2767	Raw Data
0.123384	12.3384	Raw Data
0.123384	12.3384	Raw Data
0.123384	12.3384	Raw Data
0.123384	12.3384	Raw Data
0.12377	12.377	Raw Data
0.123856	12.3856	Raw Data
0.124805	12.4805	Raw Data
0.125568	12.5568	Raw Data
0.125959	12.5959	Raw Data
0.126419	12.6419	Raw Data
0.127496	12.7496	Raw Data
0.127603	12.7603	Raw Data
0.128024	12.8024	Raw Data
0.128753	12.8753	Raw Data
0.129671	12.9671	Raw Data
0.129859	12.9859	Raw Data
0.131782	13.1782	Raw Data
0.132465	13.2464	Raw Data
0.133256	13.3256	Raw Data
0.133683	13.3683	Raw Data
0.133908	13.3908	Raw Data
0.134753	13.4753	Raw Data
0.135773	13.5773	Raw Data
0.136231	13.6231	Raw Data
0.13936	13.936	Raw Data
0.139407	13.9407	Raw Data
0.139588	13.9588	Raw Data
0.140891	14.0891	Raw Data
0.141056	14.1056	Raw Data
0.141364	14.1364	Raw Data
0.143798	14.3798	Raw Data
0.144432	14.4432	Raw Data
0.14569	14.569	Raw Data
0.14569	14.569	Raw Data
0.147249	14.7249	Raw Data
0.147332	14.7332	Raw Data
0.147802	14.7802	Raw Data
0.148879	14.8879	Raw Data
0.149034	14.9034	Raw Data
0.149092	14.9092	Raw Data
0.149415	14.9415	Raw Data
0.150969	15.0969	Raw Data
0.15111	15.111	Raw Data
0.151405	15.1405	Raw Data
0.151487	15.1487	Raw Data
0.153086	15.3086	Raw Data
0.153321	15.3321	Raw Data
0.153359	15.3359	Raw Data
0.154426	15.4426	Raw Data
0.154816	15.4816	Raw Data
0.154828	15.4828	Raw Data
0.154912	15.4912	Raw Data
0.155534	15.5534	Raw Data
0.156551	15.6551	Raw Data
0.156716	15.6716	Raw Data
0.156769	15.6769	Raw Data
0.157853	15.7853	Raw Data
0.157853	15.7853	Raw Data
0.157853	15.7853	Raw Data
0.157853	15.7853	Raw Data
0.158103	15.8103	Raw Data
0.158103	15.8103	Raw Data
0.158703	15.8703	Raw Data
0.158757	15.8757	Raw Data
0.159169	15.9169	Raw Data
0.159538	15.9538	Raw Data
0.159585	15.9585	Raw Data
0.159649	15.9649	Raw Data
0.159835	15.9835	Raw Data
0.16116	16.116	Raw Data
0.161246	16.1246	Raw Data
0.162039	16.2039	Raw Data
0.162337	16.2337	Raw Data
0.162969	16.2969	Raw Data
0.162995	16.2995	Raw Data
0.163009	16.3009	Raw Data
0.1641	16.41	Raw Data
0.164286	16.4286	Raw Data
0.164286	16.4286	Raw Data
0.165364	16.5364	Raw Data
0.165875	16.5875	Raw Data
0.167088	16.7088	Raw Data
0.167088	16.7088	Raw Data
0.167486	16.7486	Raw Data
0.167637	16.7637	Raw Data
0.167743	16.7743	Raw Data
0.168251	16.8251	Raw Data
0.168481	16.8481	Raw Data
0.169369	16.9369	Raw Data
0.169971	16.9971	Raw Data
0.169983	16.9983	Raw Data
0.171663	17.1663	Raw Data
0.172337	17.2337	Raw Data
0.173414	17.3414	Raw Data
0.174178	17.4178	Raw Data
0.175316	17.5316	Raw Data
0.175368	17.5368	Raw Data
0.175656	17.5656	Raw Data
0.176654	17.6654	Raw Data
0.177	17.7	Raw Data
0.177206	17.7206	Raw Data
0.177206	17.7206	Raw Data
0.177206	17.7206	Raw Data
0.177593	17.7593	Raw Data
0.179279	17.9279	Raw Data
0.180311	18.0311	Raw Data
0.180676	18.0676	Raw Data
0.181306	18.1306	Raw Data
0.181609	18.1609	Raw Data
0.181916	18.1916	Raw Data
0.182003	18.2003	Raw Data
0.182078	18.2078	Raw Data
0.182279	18.2279	Raw Data
0.18301	18.301	Raw Data
0.183641	18.3641	Raw Data
0.184118	18.4118	Raw Data
0.184428	18.4428	Raw Data
0.18459	18.459	Raw Data
0.184682	18.4682	Raw Data
0.185233	18.5233	Raw Data
0.185803	18.5803	Raw Data
0.187511	18.7511	Raw Data
0.18781	18.781	Raw Data
0.187942	18.7942	Raw Data
0.187982	18.7982	Raw Data
0.188277	18.8277	Raw Data
0.189069	18.9069	Raw Data
0.189255	18.9255	Raw Data
0.189365	18.9365	Raw Data
0.189542	18.9542	Raw Data
0.189563	18.9563	Raw Data
0.189962	18.9962	Raw Data
0.190076	19.0076	Raw Data
0.190534	19.0534	Raw Data
0.190545	19.0545	Raw Data
0.191026	19.1026	Raw Data
0.191066	19.1066	Raw Data
0.19162	19.162	Raw Data
0.191718	19.1718	Raw Data
0.191915	19.1915	Raw Data
0.192012	19.2012	Raw Data
0.192312	19.2312	Raw Data
0.192312	19.2312	Raw Data
0.192378	19.2378	Raw Data
0.193368	19.3368	Raw Data
0.19369	19.369	Raw Data
0.194456	19.4456	Raw Data
0.194746	19.4746	Raw Data
0.194746	19.4746	Raw Data
0.194746	19.4746	Raw Data
0.194977	19.4977	Raw Data
0.195099	19.5099	Raw Data
0.195235	19.5235	Raw Data
0.195307	19.5307	Raw Data
0.19534	19.534	Raw Data
0.195584	19.5584	Raw Data
0.195636	19.5636	Raw Data
0.195706	19.5706	Raw Data
0.195919	19.5919	Raw Data
0.195919	19.5919	Raw Data
0.196631	19.6631	Raw Data
0.196631	19.6631	Raw Data
0.196864	19.6864	Raw Data
0.196879	19.6879	Raw Data
0.197144	19.7144	Raw Data
0.197526	19.7526	Raw Data
0.198843	19.8843	Raw Data
0.199004	19.9004	Raw Data
0.199422	19.9422	Raw Data
0.19949	19.949	Raw Data
0.199644	19.9644	Raw Data
0.200313	20.0313	Raw Data
0.200721	20.0721	Raw Data
0.201225	20.1225	Raw Data
0.201551	20.1551	Raw Data
0.203205	20.3205	Raw Data
0.20418	20.418	Raw Data
0.204181	20.4181	Raw Data
0.204726	20.4726	Raw Data
0.204794	20.4794	Raw Data
0.20491	20.491	Raw Data
0.205619	20.5619	Raw Data
0.20604	20.604	Raw Data
0.206175	20.6175	Raw Data
0.206279	20.6279	Raw Data
0.206444	20.6444	Raw Data
0.207338	20.7338	Raw Data
0.207549	20.7549	Raw Data
0.2107	21.07	Raw Data
0.210979	21.0979	Raw Data
0.212159	21.2159	Raw Data
0.212298	21.2298	Raw Data
0.2127	21.27	Raw Data
0.212929	21.2929	Raw Data
0.212948	21.2948	Raw Data
0.212948	21.2948	Raw Data
0.212987	21.2987	Raw Data
0.213038	21.3038	Raw Data
0.213756	21.3756	Raw Data
0.214336	21.4336	Raw Data
0.214497	21.4497	Raw Data
0.215033	21.5033	Raw Data
0.215526	21.5526	Raw Data
0.216188	21.6188	Raw Data
0.216534	21.6534	Raw Data
0.21672	21.672	Raw Data
0.216987	21.6987	Raw Data
0.217266	21.7266	Raw Data
0.217664	21.7664	Raw Data
0.217929	21.7929	Raw Data
0.218525	21.8525	Raw Data
0.218525	21.8525	Raw Data
0.218552	21.8552	Raw Data
0.218932	21.8932	Raw Data
0.219738	21.9738	Raw Data
0.219749	21.9749	Raw Data
0.22093	22.093	Raw Data
0.220958	22.0958	Raw Data
0.221798	22.1798	Raw Data
0.222165	22.2165	Raw Data
0.222546	22.2546	Raw Data
0.222779	22.2779	Raw Data
0.223222	22.3222	Raw Data
0.223255	22.3255	Raw Data
0.223763	22.3763	Raw Data
0.223884	22.3884	Raw Data
0.223893	22.3893	Raw Data
0.224042	22.4042	Raw Data
0.22455	22.455	Raw Data
0.224932	22.4932	Raw Data
0.22548	22.548	Raw Data
0.22548	22.548	Raw Data
0.225541	22.5541	Raw Data
0.227282	22.7282	Raw Data
0.228034	22.8034	Raw Data
0.228253	22.8253	Raw Data
0.2285	22.85	Raw Data
0.228743	22.8743	Raw Data
0.229389	22.9389	Raw Data
0.23024	23.024	Raw Data
0.230481	23.0481	Raw Data
0.23207	23.207	Raw Data
0.232648	23.2648	Raw Data
0.232708	23.2708	Raw Data
0.233044	23.3044	Raw Data
0.233044	23.3044	Raw Data
0.233044	23.3044	Raw Data
0.23346	23.346	Raw Data
0.234246	23.4246	Raw Data
0.234508	23.4508	Raw Data
0.234693	23.4693	Raw Data
0.234808	23.4808	Raw Data
0.234828	23.4828	Raw Data
0.234963	23.4963	Raw Data
0.235363	23.5363	Raw Data
0.235378	23.5378	Raw Data
0.236494	23.6494	Raw Data
0.2369	23.69	Raw Data
0.237319	23.7319	Raw Data
0.237632	23.7632	Raw Data
0.23777	23.777	Raw Data
0.238536	23.8536	Raw Data
0.23879	23.879	Raw Data
0.238988	23.8988	Raw Data
0.239364	23.9364	Raw Data
0.239603	23.9603	Raw Data
0.239824	23.9824	Raw Data
0.239922	23.9922	Raw Data
0.24026	24.026	Raw Data
0.240512	24.0512	Raw Data
0.24062	24.062	Raw Data
0.241084	24.1084	Raw Data
0.241119	24.1119	Raw Data
0.241636	24.1636	Raw Data
0.241818	24.1818	Raw Data
0.242375	24.2375	Raw Data
0.243697	24.3697	Raw Data
0.244254	24.4254	Raw Data
0.24498	24.498	Raw Data
0.24605	24.605	Raw Data
0.246516	24.6516	Raw Data
0.246969	24.6969	Raw Data
0.247344	24.7344	Raw Data
0.247568	24.7568	Raw Data
0.247722	24.7722	Raw Data
0.247902	24.7902	Raw Data
0.247902	24.7902	Raw Data
0.247902	24.7902	Raw Data
0.248408	24.8408	Raw Data
0.248541	24.8541	Raw Data
0.249002	24.9002	Raw Data
0.249069	24.9069	Raw Data
0.250245	25.0245	Raw Data
0.250245	25.0245	Raw Data
0.250245	25.0245	Raw Data
0.251707	25.1707	Raw Data
0.252015	25.2015	Raw Data
0.252015	25.2015	Raw Data
0.253775	25.3775	Raw Data
0.254317	25.4317	Raw Data
0.254332	25.4332	Raw Data
0.254355	25.4355	Raw Data
0.25459	25.459	Raw Data
0.25487	25.487	Raw Data
0.255085	25.5085	Raw Data
0.255582	25.5582	Raw Data
0.255603	25.5603	Raw Data
0.255854	25.5854	Raw Data
0.25609	25.609	Raw Data
0.256199	25.6199	Raw Data
0.257713	25.7713	Raw Data
0.257981	25.7981	Raw Data
0.259506	25.9506	Raw Data
0.25959	25.959	Raw Data
0.259783	25.9783	Raw Data
0.25988	25.988	Raw Data
0.260871	26.0871	Raw Data
0.261878	26.1878	Raw Data
0.262869	26.2869	Raw Data
0.263414	26.3414	Raw Data
0.263645	26.3645	Raw Data
0.264317	26.4317	Raw Data
0.264947	26.4947	Raw Data
0.265028	26.5028	Raw Data
0.265169	26.5169	Raw Data
0.265586	26.5586	Raw Data
0.265844	26.5844	Raw Data
0.265855	26.5855	Raw Data
0.266413	26.6413	Raw Data
0.266892	26.6892	Raw Data
0.267604	26.7604	Raw Data
0.268075	26.8075	Raw Data
0.268164	26.8164	Raw Data
0.268674	26.8674	Raw Data
0.269016	26.9016	Raw Data
0.269036	26.9036	Raw Data
0.269488	26.9488	Raw Data
0.269871	26.9871	Raw Data
0.269975	26.9975	Raw Data
0.270039	27.0039	Raw Data
0.270169	27.0169	Raw Data
0.271208	27.1208	Raw Data
0.271404	27.1404	Raw Data
0.271898	27.1898	Raw Data
0.271937	27.1937	Raw Data
0.272632	27.2632	Raw Data
0.273134	27.3134	Raw Data
0.274163	27.4163	Raw Data
0.274483	27.4483	Raw Data
0.275285	27.5285	Raw Data
0.275929	27.5929	Raw Data
0.276566	27.6566	Raw Data
0.276641	27.6641	Raw Data
0.276927	27.6927	Raw Data
0.276927	27.6927	Raw Data
0.276964	27.6964	Raw Data
0.277094	27.7094	Raw Data
0.278159	27.8159	Raw Data
0.2787	27.87	Raw Data
0.278865	27.8865	Raw Data
0.278878	27.8878	Raw Data
0.278898	27.8898	Raw Data
0.279296	27.9296	Raw Data
0.279841	27.9841	Raw Data
0.280334	28.0334	Raw Data
0.280817	28.0817	Raw Data
0.281056	28.1056	Raw Data
0.28143	28.143	Raw Data
0.281444	28.1444	Raw Data
0.282002	28.2002	Raw Data
0.282009	28.2009	Raw Data
0.282085	28.2085	Raw Data
0.282362	28.2362	Raw Data
0.282652	28.2652	Raw Data
0.283133	28.3133	Raw Data
0.284279	28.4279	Raw Data
0.284838	28.4838	Raw Data
0.285085	28.5085	Raw Data
0.285344	28.5344	Raw Data
0.285925	28.5925	Raw Data
0.285953	28.5953	Raw Data
0.285953	28.5953	Raw Data
0.286075	28.6075	Raw Data
0.28632	28.632	Raw Data
0.28632	28.632	Raw Data
0.286617	28.6617	Raw Data
0.286991	28.6991	Raw Data
0.28711	28.711	Raw Data
0.287161	28.7161	Raw Data
0.287323	28.7323	Raw Data
0.287459	28.7459	Raw Data
0.288187	28.8187	Raw Data
0.289538	28.9538	Raw Data
0.29035	29.035	Raw Data
0.290507	29.0507	Raw Data
0.290682	29.0682	Raw Data
0.290782	29.0782	Raw Data
0.291906	29.1906	Raw Data
0.292126	29.2126	Raw Data
0.293746	29.3746	Raw Data
0.294988	29.4988	Raw Data
0.294988	29.4988	Raw Data
0.295271	29.5271	Raw Data
0.295276	29.5276	Raw Data
0.296493	29.6493	Raw Data
0.297134	29.7134	Raw Data
0.297346	29.7346	Raw Data
0.297357	29.7357	Raw Data
0.29809	29.809	Raw Data
0.298443	29.8443	Raw Data
0.298618	29.8618	Raw Data
0.2988	29.88	Raw Data
0.298813	29.8813	Raw Data
0.299577	29.9577	Raw Data
0.299888	29.9888	Raw Data
0.299959	29.9959	Raw Data
0.301373	30.1373	Raw Data
0.301625	30.1625	Raw Data
0.301721	30.1721	Raw Data
0.30257	30.257	Raw Data
0.303203	30.3203	Raw Data
0.304532	30.4532	Raw Data
0.304874	30.4874	Raw Data
0.305692	30.5692	Raw Data
0.306468	30.6468	Raw Data
0.307129	30.7129	Raw Data
0.309677	30.9677	Raw Data
0.309772	30.9772	Raw Data
0.310842	31.0842	Raw Data
0.310918	31.0918	Raw Data
0.312327	31.2327	Raw Data
0.312354	31.2354	Raw Data
0.312462	31.2462	Raw Data
0.312664	31.2664	Raw Data
0.312664	31.2664	Raw Data
0.313032	31.3032	Raw Data
0.314042	31.4042	Raw Data
0.314689	31.4689	Raw Data
0.314706	31.4706	Raw Data
0.315627	31.5627	Raw Data
0.315627	31.5627	Raw Data
0.31574	31.574	Raw Data
0.316223	31.6223	Raw Data
0.316519	31.6519	Raw Data
0.317695	31.7695	Raw Data
0.318072	31.8072	Raw Data
0.318072	31.8072	Raw Data
0.31863	31.863	Raw Data
0.319282	31.9282	Raw Data
0.319644	31.9644	Raw Data
0.320476	32.0476	Raw Data
0.320476	32.0476	Raw Data
0.320476	32.0476	Raw Data
0.32189	32.189	Raw Data
0.32233	32.233	Raw Data
0.322393	32.2393	Raw Data
0.322534	32.2534	Raw Data
0.322534	32.2534	Raw Data
0.322734	32.2734	Raw Data
0.322804	32.2804	Raw Data
0.324058	32.4058	Raw Data
0.324388	32.4388	Raw Data
0.324637	32.4637	Raw Data
[truncated: 1,745 more rows]

## Sheet: 6.Protrein_CV_Summary
CV_thresholds	Quantative protein numbers	Quantative protein numbers[%]		Type
CV% < 5	10	0.896057	STAVER
CV% < 15	114	10.2151	STAVER
CV% < 30	392	35.1254	STAVER
CV% <50	326	29.2115	STAVER
CV% <100	234	20.9677	STAVER
CV% <200	40	3.58423	STAVER
CV% >200	0	0	STAVER
CV% < 5	2	0.088692	Raw Data
CV% < 15	86	3.81375	Raw Data
CV% < 30	375	16.6297	Raw Data
CV% <50	381	16.8958	Raw Data
CV% <100	886	39.2905	Raw Data
CV% <200	501	22.2173	Raw Data
CV% >200	24	1.0643	Raw Data

## Sheet: 7.Scatter_Plot
	index	QC_proteins	LFQ_intensity	Type
0	Exp112124	C8G	9.62599e+06	Raw data
1	Exp112119	C8G	7.68681e+06	Raw data
2	Exp112125	C8G	1.45708e+07	Raw data
3	Exp112126	C8G	1.13288e+07	Raw data
4	Exp112122	C8G	7.08314e+07	Raw data
5	Exp112123	C8G	1.16761e+07	Raw data
6	Exp112121	C8G	9.01197e+06	Raw data
7	Exp112120	C8G	8.45342e+06	Raw data
8	Exp112124	C1R	14915183	Raw data
9	Exp112119	C1R	3.36595e+06	Raw data
10	Exp112125	C1R	4.92287e+06	Raw data
11	Exp112126	C1R	4.88645e+06	Raw data
12	Exp112122	C1R	5.62195e+06	Raw data
13	Exp112123	C1R	7.29838e+06	Raw data
14	Exp112121	C1R	6.70527e+06	Raw data
15	Exp112120	C1R	1.30845e+07	Raw data
32	Exp112124	F5	728078	Raw data
33	Exp112119	F5	2.00227e+07	Raw data
34	Exp112125	F5	1.56558e+07	Raw data
35	Exp112126	F5	1.70307e+07	Raw data
36	Exp112122	F5	1.40711e+07	Raw data
37	Exp112123	F5	1.45512e+06	Raw data
38	Exp112121	F5	875168	Raw data
39	Exp112120	F5	1.15023e+06	Raw data
40	Exp112124	C8G	1.74066e+07	STAVER
41	Exp112119	C8G	1.73223e+07	STAVER
42	Exp112125	C8G	1.89461e+07	STAVER
43	Exp112126	C8G	1.73323e+07	STAVER
44	Exp112122	C8G	1.72446e+07	STAVER
45	Exp112123	C8G	1.70507e+07	STAVER
46	Exp112121	C8G	1.74792e+07	STAVER
47	Exp112120	C8G	1.78392e+07	STAVER
48	Exp112124	C1R	8.36497e+06	STAVER
49	Exp112119	C1R	8.05904e+06	STAVER
50	Exp112125	C1R	8.56827e+06	STAVER
51	Exp112126	C1R	8.36709e+06	STAVER
52	Exp112122	C1R	7.00492e+06	STAVER
53	Exp112123	C1R	8.69491e+06	STAVER
54	Exp112121	C1R	8.90703e+06	STAVER
55	Exp112120	C1R	8.83096e+06	STAVER
72	Exp112124	F5	2.24804e+06	STAVER
73	Exp112119	F5	2.24055e+06	STAVER
74	Exp112125	F5	2.32014e+06	STAVER
75	Exp112126	F5	2.12714e+06	STAVER
76	Exp112122	F5	2.10774e+06	STAVER
77	Exp112123	F5	2.20342e+06	STAVER
78	Exp112121	F5	2.17918e+06	STAVER
79	Exp112120	F5	2.34143e+06	STAVER
