# Supplementary material for: STAVER: A Standardized Benchmark Dataset-Based Algorithm for Effective Variation Reduction in Large-Scale DIA MS Data
Source: Research Square preprint supplement (doi:10.21203/rs.3.rs-3111384/v1), 2023-07-10
Supplement: Supplementary file 4 [file e2b5679e7c32214e6507196e.xlsx]

## Sheet: Legend
Table S3 presents a detailed examination of four public DIA proteomics datasets and their corresponding analysis results to evaluate the performance of the STAVER algorithm, in relation to Figure 4.
The description includes the following key components:
1.PXD025752_QC_Rawdata. This sheet contains information on proteins identified in DIA-NN output raw results..
2.PXD025752_QC_STAVER. This sheet contains information on proteins identified in DIA-NN output results processed by the STAVER algorithm.
3.Spearman_Cor_QC_Rawdata. The Spearman's rank correlation coefficient for raw data is 0.90 (IQR = 0.89-0.92).
4.Spearman_Cor_QC_STAVER. The Spearman's rank correlation coefficient for STAVER-processed data is 0.94 (IQR = 0.93-0.96).
5.Protein_Nums QC_Data. The number of protein identifications in raw data and STAVER-processed data, respectively.
6.Protein_Nums_Plasma_Serum. The number of protein identifications in Plasam and Serum data are provided, respectively.
7.Serum_Plasma_CV. The coefficient of variation (CV) of proteins in Plasma and Serum STAVER-processed data.
8.Reported_Covid_Biomarkers. Plasma protein biomarkers of COVID-19 that have been reported in the literature are detailed.
9.Heatmap_biomarkers. This sheet highlights the up- and down-regulation of confirmed COVID serum protein biomarkers shared in two public datasets (IPX0002186001 and IPX0002924001 cohort studies) compared to healthy groups.
10.Biomarkers_P-values. The significant differences of shared serum protein biomarkers shared in two public datasets (IPX0002186001 and IPX0002924001 cohort studies) compared to healthy groups (Benjamini-Hochberg adjusted p < 0.05, Wilcoxon rank-sum test). P-values < 0.05 and |Fold change (FC)| > 1.5 considered significant.

## Sheet: 1.PXD025752_QC_Rawdata
Protein.Group	tQC_NA_NA_104	tQC_NA_NA_114	tQC_NA_NA_12	tQC_NA_NA_124	tQC_NA_NA_134	tQC_NA_NA_144	tQC_NA_NA_155	tQC_NA_NA_165	tQC_NA_NA_175	tQC_NA_NA_185	tQC_NA_NA_195	tQC_NA_NA_2	tQC_NA_NA_206	tQC_NA_NA_216	tQC_NA_NA_22	tQC_NA_NA_226	tQC_NA_NA_236	tQC_NA_NA_246	tQC_NA_NA_257	tQC_NA_NA_267	tQC_NA_NA_277	tQC_NA_NA_287	tQC_NA_NA_297	tQC_NA_NA_308	tQC_NA_NA_318	tQC_NA_NA_32	tQC_NA_NA_328	tQC_NA_NA_338	tQC_NA_NA_348	tQC_NA_NA_359	tQC_NA_NA_369	tQC_NA_NA_379	tQC_NA_NA_389	tQC_NA_NA_42	tQC_NA_NA_53	tQC_NA_NA_63	tQC_NA_NA_73	tQC_NA_NA_83	tQC_NA_NA_93
A0A075B6H9	23.663	48.322	50.4473	46.5446	44.714	48.1185	36.9534	34.884	32.2718	34.8278	37.2247	42.0779	38.173	47.9928	41.346	32.1049	36.3687	36.7648	29.5414	31.8072	39.8562	37.2425	27.4738	32.0281	31.197	53.3394	26.7229	26.4489	32.8148	20.894	27.9751	23.1688	24.6584	32.8911	58.5665	14.9709	45.0046	41.8045	41.6457
A0A075B6I0	49.1268	11.7078	45.8863	27.1712	1.64551	17.2084	10.4401	1.20999	2.1845	7.9786	24.1449	7.6888	39.099	26.3889	18.4963	29.0014	23.335	26.6647	38.8243	20.1141	9.28835	13.5548	9.7564	15.9957	8.28495	4.48678	7.4237	11.0055	25.6791	26.5349	29.6512	24.9208	26.4177	22.0112	16.1384	22.8033	8.2351	15.0189	19.1818
A0A075B6I1	0	4.1897	0	0	0	0	2.14755	0	0	0	0	0	5.3201	0	0	1.84872	0	5.90848	0	0	2.09959	1.26501	2.47119	1.65671	0	0	0	0		0	1.64123	2.99136	3.31504	0	0	3.50542	0	0	0
A0A075B6J9	0	0	0	0	0	0		0	0	0	0	4.18703		1.27452	0	0	0	0	0		1.49187	0		0.72693	0	4.05608	0	2.10681	0.73359	0		4.9063	0	0	0	0	0	0
A0A075B6K0	116.948		72.3128	163.371		94.1894	61.0258		71.313	66.6103	90.0554	79.686				60.5366	35.3246	42.2961		155.24	62.6895	56.9063	52.4728	65.8662			61.8662	56.1316			93.2415	72.9465	21.2563		139.371	97.4191	103.639	45.0454	83.5942
A0A075B6K0;A0A075B6K4
A0A075B6K0;P01717;P01718	70.6592	49.1075	42.9018	42.3559	92.2842	21.7861	42.5865	69.8564	66.8973	81.3086	94.7646	55.3738	25.4252	61.4628	53.248	59.0398	80.8497	54.6624	50.9697	50.8731	38.7716	49.1097	37.8993	38.8177	35.7028	48.2123	31.0727	30.3971	27.2228	43.5574	32.1046	39.699	24.4527	68.6448	83.4061	46.1793	52.0759	55.818	78.1932
A0A075B6K2;A0A075B6K5;P80748	43.1702	59.1702	51.3942	38.4236	42.6079	37.5638	48.781	34.8958	48.4133	41.1246	37.0869	39.2033	29.469	48.4997	44.0855	63.7056	43.1295	30.3507	52.8189	47.9944	42.127	22.1639	48.3726	41.1923	24.7969	68.1952	30.791	20.6648	28.2212	26.0751	24.3128	36.534	26.3993	72.8368	49.6678	25.9832	60.9736	34.2833	58.4484
A0A075B6K4	248.449	462.333	221.364	402.717	228.209	189.501	414.427	406.514	183.196	387.489	226.32	782.937	184.798	162.832	403.234	130.287	170.623	228.097	325.035	337.763	140.864	257.414	216.985	263.624	135.502	444.139	232.533	218.701	221.237	226.207	101.36	169.668	123.92	697.033	429.885	407.298	220.264	400.228	487.036
A0A075B6K4;P01717	243.058	177.939	197.596	264.978	164.409	262.277	214.862	249.866	146.039	200.835	188.366	190.393	203.661	228.236	240.294	122.254	176.413	159.222	136.095	262.498	162.482	127.383	105.175	107.792	105.196	270.722	102.199	68.5838	93.8307	104.962	87.9104	94.1722	116.102	200.631	283.151	253.907	306.182	283.323	199.108
A0A075B6K5	0	1.96975	0	0	0	0	0	0	0	0	0	0	0	0	0	0	0.5449	1.36772	0	0	0	0		0	0	0	1.31837	0.488082	0	0	0.904195	0.136433	0	0	0	0	0	0	0
A0A075B6K5;P80748	126.838	101.175	96.0732	123.62	79.6195	146.058	73.4995	73.527	101.946	128.012	73.3875	166.681	103.674	128.229	181.766	44.3663	73.6622	53.4432	54.9512	69.7175	59.0718	39.5561	49.6609	35.2458	26.2426	194.782	24.1611	37.7025	42.7046	31.4169	15.5291	37.7329	28.4732	209.463	152.365	169.476	131.138	163.646	73.601
A0A075B6P5;A0A087WW87;P01614;P01615	0	0	23.5648	0	18.8625	17.7377	3.29151	3.1848	6.06576	18.5426	3.56278	0	1.15384	12.2038	77.8956	9.30295	5.48885	12.0846	15.6708	3.25714	6.95566	5.6734	4.93008		4.33676	0	6.70768	6.7657	9.23434	1.33107	3.45241	5.78536	9.3518	0	35.6063	7.73318	0	15.6165	23.6336
A0A075B6Q5	55.1213		92.0265	0	0	22.4519	0	21.9995	25.1337	13.7305	30.2839		15.6715	13.383	0		8.5589			11.3182	8.49725	4.16097	11.1503	6.42016	7.36829	34.6197	7.20546	8.01781	3.9087	2.61714	4.97837	7.24126	3.69403	65.2837	42.9502	33.7818	0	26.1299	33.8293
A0A075B6R2	17.901	14.8992		21.8694					10.5482	18.7993	13.0288				50.159		6.13553			1.37552		5.70936			0	35.0649				0				39.5268	33.8076	20.5693	15.4975
A0A075B6R2;P0DP08	24.4733		26.3706	30.5523	33.3438	21.7603	0	1.4049	0	11.5768	4.02977	69.0321	3.84993		39.1352	9.77315	11.5939	5.79265	2.23123	19.5856	5.74532	8.98612	8.57722	3.77347	5.20381	14.8212	8.64993	12.3491	12.8257	0.322384	5.3379	0.361402	3.1848	38.5129	22.9417	5.71118	25.5628	68.455	30.1306
A0A075B6S2	43.0125	34.5447	30.88	16.4595	17.2789	4.39562	10.1974	43.901	29.2302	6.165	38.0624	72.4095	26.0363	31.9153	52.8618	22.5395	5.29624	20.524	3.591	12.5961	17.7507	17.8249	17.3575	17.4653	11.7831	32.5879	26.2559	2.91305	16.3374	16.4528	28.9354	0	16.9641	18.4308	13.6757	44.4322	27.1595	16.8454	8.0853
A0A075B6S5	30.8552		88.394	35.1317	53.0882	51.7014	60.3734	28.7502	51.7919	37.0859	40.4083	354.93	36.6041	8.56324	104.23	30.1756	43.1208	51.2773	39.5877	29.267	13.8722	16.5424	16.9125	7.52411		73.689	5.25371	12.9686		9.34398	6.29643		21.3541	168.08	90.2302	61.9198			101.755
A0A075B6S5;A0A0C4DH67	8.68629	26.3459	29.7684	31.018	13.6094	10.4258	16.7182	2.23144	10.6642	21.7144	2.47899	97.152	7.32231	2.80838	13.8051	16.9359	14.8385	9.10858	8.32438	11.2336	11.3178	9.36449	9.43948	8.03855	3.88986	21.2063	7.14246	8.94454	6.6686	7.51484	7.29501	1.94625	10.1229	7.89121	17.2045	8.51971	41.167	20.3557	11.5535
A0A087WSX0			0	19.9745			3.23792		11.8809		34.324																										12.8116
A0A087WSZ0	5.75222	0	7.87395	3.96206	6.71582	9.14624	0		4.03438	2.5566	0	18.7558	0	8.24425	24.8972	0.172153	6.14765	4.33739	5.10584	12.5577	8.22404	0	1.27186	17.6779	4.07498	3.94653	0.373138	0.6059	3.88109	0	0	1.85092	0.64469	54.7735	2.71751	4.30561	41.2639	0	0.174856
A0A087WW87;P01614			16.759																						14.1523
A0A0A0MS14	6.4481	59.3022	46.0855	0	49.3548	35.138	24.8211	13.4311	29.5444	0	38.8622	32.019	0	0	0	42.5564	0	0	0	0	9.12139	0	7.78209	22.6934	6.79167	6.25904	6.58595	0	0	0.788121	0	0	3.1745	18.0993	0	33.7256	0	0	0
A0A0A0MS15	26.7249	15.2451	49.6656	27.579	14.3686	16.9658	5.82685	11.4931	11.1533	3.11148	8.67134	80.4882	8.34998	3.45948	44.0266	0	6.11903	11.0421	9.6073	2.84174	4.96043	9.7861	8.11897	3.92047	9.05954	52.059	6.64123	4.58587	3.24756	6.1268	3.83082	11.5596	6.46025	30.1669	21.2995	9.62832	27.9489	11.8931	23.3826
A0A0A0MS15;A0A0B4J1V6	0	6.20307	29.5722	2.37669	0	19.2967	11.1204	18.3535	22.2484	13.6562	1.70908		17.3428	37.3316	40.7348	6.94525	0.46269	9.64235	6.31705	17.4966	11.1249	5.16526	7.6755	3.67306	5.2412	6.38067	0	10.6007	7.71178	18.0628	2.0188	0.550855	0	10.6592	17.8023	12.5536	19.8978	2.4988	9.47382
A0A0A0MT36	81.8501	97.6365	74.5468	130.943	10.7848	47.6809	56.7219	61.6595	56.738	52.5463	63.5445	51.1768	73.719	77.6712	17.918	75.3168	63.1117	47.8997	23.666	46.7865	64.1988	37.027	30.0838	33.1033	23.8167	43.4268	29.9719	24.7965	45.7372	27.3617	13.7246	33.9684	38.2078	92.1265	10.9327	115.847	33.4868	132.262	27.9681
A0A0B4J1U7	41.2124	29.8879	57.1292	52.9119	14.2082	25.323	26.5653	25.3672	20.4024	26.2627	21.5021	84.655	22.4328	12.2508	57.3905	22.1096	23.3245	16.2443	18.2913	9.3455	14.5945	14.6015	9.22562	12.5923	8.91624	72.3935	11.7521	10.2475	14.6917	13.09	10.2746	10.1927	7.46765	47.5162	49.4497	52.8481	39.0284	53.2755	39.6987
A0A0B4J1V0	8.09202	29.9257	21.0047	15.9299	21.193	5.19245	2.37945	16.4175	12.5434	3.0722	8.27952	37.2376	11.3085	9.82997	25.0136	9.86876	8.39659	9.52685	7.81192	4.85237	10.3683	11.0053	8.79161	7.91282	4.34842	33.9958	1.9765	5.81754	9.92607	6.787	3.88536	7.10353	2.93883	34.086	11.49	30.6723	10.9339	3.98737	9.58105
A0A0B4J1V0;A0A0B4J1V6;A0A0B4J1Y9	211.768	268.977	364.828	251.77	197.739	200.112	123.655	131.221	126.253	122.727	73.9853	505.739	103.639	101.9	221.585	41.8304	67.9756	63.9827	66.183	43.78	56.7146	56.6062	46.1374	50.6142	41.4465	301.704	54.7975	34.5137	52.4843	27.3192	30.7712	33.1178	37.7395	275.67	213.958	239.192	237.654	303.215	199.587
A0A0B4J1V1	1.42942	1.13255	3.19166	0		1.54098	3.66436				0.425431	0			2.48639					0	0				0			0		0				0	1.25928	0	0	1.89644	0.536986
A0A0B4J1V1;A0A0B4J1X5;P01767;P01780	586.735	585.814	758.146	654.698	473.627	464.743	505.03	408.222	413.794	409.842	420.397	705.597	391.35	374.044	799.639	289.876	271.927	325.67	268.275	362.919	241.523	224.956	195.167	180.483	166.42	699.045	180.351	168.899	161.287	166.441	166.714	148.621	173.155	670.144	602.407	630.343	528.547	469.285	563.937
A0A0B4J1V1;A0A0B4J1X8;A0A0C4DH32;P01766;P01780	323.604	289.795	621.23	350.357	255.223	234.67	172.309	169.787	146.273	155.196	154.686	731.333	187.516	143.925	519.427	123.353	116.108	131.545	109.451	122.065	118.937	79.072	82.5648	77.6747	75.8966	362.468	90.9609	74.9507	80.764	74.3908	71.06	70.0654	76.2777	496.156	452.26	465.902	354.188	285.055	323.127
A0A0B4J1V2	2.57293	0.896362	24.5959	3.55726	3.11739	13.5437	10.9459	3.68518	10.9177	5.31028	9.07021	6.16355	2.17624	2.40532	4.05365	1.24	3.27351	0.33864	4.52515	2.57133	2.27422	0	0	0	0	14.6096	0	0	0	0.6806	0	0	0.801776	11.4491	6.58688	0.65735	5.5526	6.62331	7.2674
A0A0B4J1X5				0.777251	0	0.254553				0.376978		4.86962	0	0	0.922999		0		0				0		0		0	0		0		0					0
A0A0B4J1X5;P01764;P01767	116.25	123.939	265.312	98.9745	52.3645	82.822	69.658	55.24	59.8945	52.7095	58.0885	318.518	38.2103	53.15	275.113	58.072	51.326	48.4977	46.0585	35.502	37.6228	39.9305	71.1715	34.4851	34.9339	204.566	29.0568	32.3182	32.5147	24.487	29.0687	32.1904	34.5076	213.923	146.969	117.484	145.64	102.233	94.113
A0A0B4J1X8	45.0731	13.7794	122.24	50.2921	18.5669	62.8448	8.58012	30.6912	67.8259	46.7026	6.85541	61.0359	64.569	24.4477	60.8101	24.1392	21.3324	43.0316	32.3798		13.8563	48.8129	6.94265	33.7047	31.9254	102.454	16.1016	21.701	12.2404	29.357	21.5607		9.42445	68.5185	0	0	58.1559	19.5964	0
A0A0B4J1Y8																							6.21547			135.911						6.14924	9.86563
A0A0B4J1Y9	20.8455	23.2452	74.2129	37.9667	20.257	9.82436	11.2719	4.60155	0	8.55445	2.75078	33.5513	20.1503	33.3181	75.313	5.76008	2.59084	4.36889	12.4137	6.99075	1.4966	2.23722	0	28.1212	3.91568	14.8076	2.90265	7.01243	4.76612	7.62547	2.56457	4.83885	5.42622	20.0203	19.0515	0	7.8982	9.72538	8.85023
A0A0B4J2D9;P0DP09	0	0	0	0	0	0	0	0	0	0	0	0	0	0	0	0	0	0	0.402428	0.301823	0	0	0	0	0	0	0	0	0	0	0	0	0	0	0	3.32334	0	0	0
A0A0B4J2H0		1.75813		1.71463	10.7326	1.77899	0			3.63943			0.475035		17.9471		0	1.26046		0.704038	0		0	0	0	4.59521	0	0					0			3.03756	9.24704
A0A0B4J2H0;A0A0C4DH29;P01742;P01743	208.065	268.087	284.871	173.265	133.326	249.492	227.969	200.622	213.434	259.521	153.953	264.703	201.992	206.618	240.615	139.17	113.546	141.229	121.844	141.119	89.9598	109.041	104.903	99.9836	91.7706	200.513	77.7497	84.4885	72.6424	68.9897	78.8063	71.4372	75.2325	244.559	276.628	217.205	285.79	230.383	221.759
A0A0B4J2H0;P01742	145.886	137.032	158.949	134.51	134.378	133.656	114.858	107.232	103.547	120.393	104.608	247.607	93.0413	96.8701	168.534	82.6663	87.5813	83.0154	88.2203	95.9311	79.8179	74.4592	55.603	30.5499	70.6972	177.346	60.1835	52.4895	53.745	49.5438	31.7769	22.6413	32.2122	185.016	180.956	149.25	157.839	144.304	143.148
A0A0C4DH25	32.5723	5.36945	126.393	7.34185	66.2226	34.6985	19.5686	18.5584	18.6718	85.0696	33.4554	123.037	18.4991	85.7386	76.0384	7.66063	15.7454	37.115	15.5726	3.37484	2.04607	0	6.70335	18.6811	2.92332	70.9889	0	3.45489	19.4261	12.0794	0	7.69733	21.8274	82.6294	126.112	0	294.969	202.711	51.508
A0A0C4DH25;P01619	243.363	221.306	502.175	216.405	180.689	152.42	135.316	125.571	126.938	118.496	126.975	544.197	119.92	108.176	422.295	83.3971	86.316	93.8771	85.6861	84.3774	78.8281	74.8419	71.8193	67.4526	62.18	336.531	60.19	56.7322	57.3081	57.5744	55.024	60.1116	59.6979	291.15	297.257	312.212	314.215	227.491	205.533
A0A0C4DH29	15.4724		16.4221	11.3914	67.8081	23.1545	21.9142		16.9723	23.3214	36.0408	179.452	11.5724	18.9976	111.478	10.1833	20.9869	17.3376	9.92844	22.0368	14.4171	16.8661	13.602	8.87834	0.640336	33.0554					0.911326		14.1122	41.2655	65.7228	18.2668	14.768	30.1902	20.5412
A0A0C4DH29;A0A0C4DH31;A0A0C4DH33;P01743;P23083	716.003	742.712	843.324	617.092	661.298	622.497	651.365	615.238	659.105	669.878	589.809	858.032	503.423	530.443	808.629	429.469	389.288	389.019	385.313	492.391	336.288	251.39	308.924	311.737	272.265	727.867	287.572	237.926	265.227	248.976	228.33	213.896	196.758	801.521	872.097	765.545	733.143	702.265	733.568
A0A0C4DH31	3.68841		4.07714		7.81257		0.76204	0	0	0.707828	3.94622	18.3628						1.61615		2.11736	0					8.61475		2.93567	0.398922	0	0	0	0	3.64147				0
A0A0C4DH31;P23083	228.126	175.948	415.31	236.128	263.258	180.538	321.376	168.883		198.978	286.886	209.887	198.432	215.798	201.295	66.7928	169.571	111.164	76.3217	100.891	106.335		81.2188	76.8981	80.0279	432.505	78.3087	87.7231	78.742	109.621	89.5201		126.162		209.526	136.869	197.494	202.18	222.166
A0A0C4DH34	1864.8	850.315	2176.2	1774.43	1729.06	861.715	743.65	1578.85	1416.68	1565.93	1327.52		1319.55	744.94		1118.88	1345.54	1201.83	1050.6	704.555	933.692	875.875	882.107	748.685	833.59	1543.2	411.251	340.264	374.12	786.672	675.743	333.834	689.896	911.875	1884.77	1705.08	0	1601.95	1589.76
A0A0C4DH38	39.6224	21.6198	20.4491	9.94075	21.5493	12.8641	15.4923	6.73142	0.801115	7.61832	13.1326	17.5778	0	0.409193	23.4772	6.3666	8.72013	7.43339	1.95473	4.55441	0.183016	5.19536	0	10.25	0	13.7401	2.83691	1.15985	5.9085	3.09964	0	0	0.52529	35.8817	18.1733	11.3144	46.9029	25.2074	16.811
A0A0C4DH38;A0A0J9YXX1	89.1768	117.063	74.7753	87.8058	50.4623	84.6194	78.2746	64.369	96.4317	37.9053	76.5348	162.368	73.3851	99.3435	70.2415	28.0376	59.6848	47.2086	38.894	68.6405	13.6637	33.4568	22.6241	24.2641	23.7927	100.608	25.2748	41.1612	23.8532	33.4969	37.0124	32.6975	23.2042	104.185	79.6871	101.95	97.7526	110.169	83.8063
A0A0C4DH55;P01624	198.019	160.792	298.147	153.359	143.154	151.385	139.387	173.716	125.7	134.04	131	242.787	123.816	111.873	170.479	95.0741	71.8565	95.8754	66.392	101.437	64.0204	65.9256	54.2692	61.6327	48.3582	238.423	56.3592	46.6248	48.121	47.1341	44.9274	44.5952	60.8923	248.099	275.133	172.563	252.022	216.858	255.977
A0A0C4DH67
A0A0C4DH68	63.0976	22.863	54.9808	115.214	78.0288	73.4924	20.6695	79.1489	15.7288	47.4394	17.15	225.105	38.1058	71.4773	151.836	32.6907	16.7952	27.3703	25.8332	35.8998	34.2295	27.9913	8.63114	32.5416	34.0734	90.7373	16.408	36.0304	31.5223	8.5831	23.0742	18.6728	10.3645	170.545	110.792	0	3.4774	29.7468	31.7657
A0A0C4DH73;P01597;P01611;P04432	11.5925	25.3344	110.852	4.06773	19.6935	4.13868	14.3478	37.504	22.521	12.6958	13.7836	63.6791	16.2613	26.6232	50.5131	5.9083	6.5363	17.4889	23.0376	7.9807	7.08402	11.1746	5.6521	2.9303	8.25706	49.7055	2.71048	10.7106	5.46265	1.36541	3.73958	8.6643	8.1255	32.6747	79.003	29.138	31.9265	24.7254	10.0946
A0A0C4DH73;P01611	17.6074			14.7258						16.9926		31.9734					1.84535						0			18.6422				0	0.530899		0	20.213		28.7931
A0A0G2JMI3	482.684	488.723	546.818	572.425	453.948	420.767	395.724	465.897	401.973	361.61	350.03	591.416	362.723	357.344	510.353	254.66	277.841	271.243	250.318	306.001	210.583	154.141	117.388	186.607	174.559	530.953	150.395	138.039	181.723	150.014	132.737	146.699	126.408	558.064	522.517	500.89	510.989	418.471	494.41
A0A0J9YX35	88.5951	77.4683	164.723	62.7926	68.8762	66.3526	67.1699	55.5944	53.5459	25.1852	33.2403	293.552	36.7197	54.3462	242.909	35.9759	48.9123	27.7253	55.6556	37.1061	37.425	26.0758	21.2935	18.6636	11.5944	92.2684	13.6887	19.0956	12.8786	10.7479	7.56126	9.21168	28.7584	88.9815	141.536	138.176	161.287	131.906	63.4095
A0A0J9YXX1	267.947	301.544	681.835	338.477	302.755	379.553	300.863	181.413	232.364	109.123	163.949	501.911	172.278	91.3751	405.364	65.3988	102.209	139.69	89.9597		97.156	90.5811	76.3709	38.6876	74.8767	367.197	56.3206	70.626	56.3444	70.8736	83.8561	57.6345		508.442	362.073	230.118	641.076		97.7393
A0M8Q6	21.8444	34.7781	99.377	26.1879	62.1096	22.4546	21.376	22.4539	12.046	17.5691	17.2189	145.377	38.258	31.7073	96.6752	13.3	28.1669	13.565	19.8109	19.981	15.4672	5.65715	14.843	13.4003	3.52389	81.925	2.48489	3.13603	2.26884	3.19392	3.99141	4.14333	6.80552	65.4532	43.5499	100.67	45.9904	36.0286	49.1593
A0M8Q6;B9A064	138.57	160.963	173.127	146.617	155.38	136.87	111.805	132.422	126.655	126.058	123.639	217.702	91.6242	107.878	153.401	93.6803	97.1422	91.2694	96.0304	111.289	71.4593	73.7342	58.2008	67.7789	61.2883	167.135	62.5429	50.6633	62.9811	56.3499	47.1307	47.0589	50.0295	175.918	147.295	147.169	151.88	149.042	161.577
B9A064	1501.26	1408.87	1977.23	1624.44	1410.59	1355.61	1286.35	1514.25	1436.05	1400.29	1166.85	1853.77	1023.23	1059.98	1669.47	1050.13	936.964	932.802	877.232	980.117	910.633	843.722	681.175	685.688	771.803	1653.73	618.347	652.5	680.702	668.098	528.713	501.502	530.934	1827.37	1583.44	1880.41	1890.16	1507.78	1492.83
O14791;O14791-2;O14791-3	51.5805	49.0353	51.5309	48.9332	41.5095	51.1854	54.8149	37.7544	42.3624	47.4225	42.2693	79.7084	31.638	36.3519	58.7255	34.76	23.9601	33.2089	27.5084	27.0447	24.8221	20.2189	22.949	20.4675	18.5387	58.7884	13.2704	17.3981	17.4185	16.6527	18.0408	17.6764	19.7074	48.9011	60.8897	52.9383	55.6169	47.6318	46.9196
O43866	39.0604	27.6447	42.9604	37.7151	41.1716	25.6571	34.2625	30.2935	31.4581	25.2261	30.1962	50.5421	27.5105	29.5867	48.237	23.9574	17.6139	17.7262	18.9669	19.2605	17.0938	18.9777	15.1792	15.0107	14.5534	34.4096	15.3421	10.9688	10.6744	11.5821	14.2012	11.7424	10.6235	40.6864	38.9703	36.3403	41.6148	28.2947	35.1909
O75417;O75417-2	701.688	854.572	763.498	680.347	882.756	760.958	614.799	672.916	688.749	630.365	544.638	875.045	628.095	599.127	798.563	460.348	467.574	453.805	401.305	654.941	325.045	294.761	282.202	295.484	293.808	832.204	256.148	237.926	252.952	207.22	235.922	214.913	247.015	847.219	882.98	726.439		696.137	891.594
O75636	39.2709	32.232	99.4171	35.9058	52.6092	56.1228	38.3945	41.7242	14.7959	56.8459	19.6448	147.352	19.4369	18.3756	78.7402	8.9262	11.4097	18.0526	11.5268	8.9614	10.1858	9.9855	14.4421	9.93539	7.91939	69.4779	9.32053	7.19913	7.50323	9.07826	17.4089	10.0249	8.49953	46.9145	62.4654	36.6807	43.505	36.3422	40.4993
O75882-2;O75882-3	7.94225	6.63366	15.3486	14.9273	7.56222	18.9885	11.9726	14.3016	8.32954	11.5165	4.58473	8.04996	11.371	5.10947	33.486	3.46307	8.17795	5.58914	2.55527	11.7293	6.27455	4.92795	2.53646	3.40548	1.77794	14.2476	0.563873	5.66697	2.92812	6.94422	3.33299	4.24439	1.58799	9.94264	12.7652	17.4243	11.7658	8.93118	13.5923
O95445	40.9482	42.8403	24.105	12.449	35.7178	22.5094	33.9965	28.5444	26.1585	15.6804	10.5433	37.4018	31.5412	36.5829	29.3672	19.6669	18.7108	12.4358	18.8323	33.1879	15.8926	11.9599	8.03243	24.0357	14.8551	43.0192	5.05611	20.5041	19.9464	20.8252	8.12956	5.24635	9.18625	37.4967	31.7733	26.961	31.1003	23.4375	12.8621
P00450	97.0501	83.8677	119.964	114.317	73.6739	68.4256	62.5992	58.1863	61.0787	71.4067	46.824	171.01	51.4451	48.4811	130.281	43.5778	40.8797	44.717	46.1906	47.2355	39.8802	30.1008	27.6699	25.3442	28.2635	131.403	25.4275	22.54	23.1764	23.8687	22.7888	23.768	25.835	103.344	116.667	81.4139	124.562	75.9822	92.9149
P00488	0	0	0	0	0	0		0		0.346659	0	0	0	0	0	0	0	0	0		0	0	0.349598	0		0	0	0	0		0	2.52101	0	0	0	0	0	0
P00734	64.2437	56.1967	94.2717	60.1758	48.0501	47.1965	35.2929	37.1853	43.5309	44.2922	35.3574	117.594	40.2047	41.157	106.325	33.0968	28.9192	24.3749	29.4048	26.9491	20.9987	19.8874	17.727	20.139	20.7909	82.6539	18.7486	18.6142	18.1139	16.1101	16.9573	18.3355	17.6581	67.1468	73.6542	62.8215	69.2555	59.3558	61.4441
P00736	53.8795	48.5359	49.2044	58.2202	56.0155	42.9585	19.143	65.0582	37.474	71.4087	71.6295	88.8826	57.3716	35.5038	68.9956	38.4581	46.7671	32.2728	46.7757	48.6787	39.3326	32.2305	24.0468	31.881	36.1041	37.5403	10.1195	18.6701	24.5483	36.3976	25.8585	35.9568	29.07	63.0055	36.842	55.1214	41.631	49.7263	52.1702
P00738	255.88	263.283	405.098	266.853	223.179	201.745	176.033	161.028	151.58	158.4	130.422	460.161	136.598	142.345	351.403	113.583	104.474	111.025	98.5281	114.71	77.4494	81.4408	67.1805	73.5346	70.2522	335.68	65.0982	62.5227	63.7855	59.4374	56.7431	54.7228	64.3818	328.216	313.061	277.698	328.33	250.941	237.865
P00738;P00739	317.517	322.076	413.155	295.316	307.775	259.735	234.402	219.602	235.708	209.66	199.931	464.204	178.198	231.146	419.794	158.43	153.045	169.022	136.391	208.416	142.248	121.777	113.702	123.866	112.439	407.071	112.011	99.968	85.3458	94.3666	100.319	95.8327	92.9612	373.057	404.631	362.692	354.372	315.421	299.818
P00739	58.3135	104.702	117.985	57.0288	46.7158	38.9626	47.2831	26.9445	42.6754	40.4298	34.4975	126.049	38.8795	45.0957	99.1472	33.4019	37.4689	26.9884	31.536	30.6029	29.4458	25.1241	33.1627	27.2244	20.3632	81.738	18.9776	23.8423	18.5895	18.1733	21.9863	22.3164	23.6141	92.9714	70.8843	55.2566	81.4059	71.6502	73.9465
P00740	23.8887	21.6207	19.8037	9.46574	18.7272	21.6964	26.2439	11.4347	20.6728	14.039	9.88716	48.4962	9.00223	4.70661	24.0531	8.79694	9.78926	10.0748	11.029	5.78741	2.75859	4.25824	6.21484	5.02146	2.74569	17.0002	2.29583	7.84804	3.25993	2.60393	12.3471	5.9589	5.95684	15.9893	0.593482	6.55229	11.0683	13.764	12.6209
P00742	37.5895	22.1389	31.7716	20.7415	13.1422	7.03742	9.7762	13.6857	15.7834	11.2123	5.37097	32.7842	8.86358	13.6127	17.2245	10.7938	4.92589	3.0786	6.7728	4.96418	9.14611	2.69898	6.06049	3.96662	1.11765	13.8006	9.48898	4.21733	10.1354	2.52749	4.41752	1.76	2.93571	3.26938	29.4955	20.5313	29.1811	20.8466	8.88861
P00746	0	4.15763	16.0406	0	0	5.20996	0	11.3407	0	0	0	21.4257	0	0	26.0995	11.6776	0	2.65635	1.66022	0	0	3.21301	2.68204	2.75094	3.09904	23.0075	0	1.14852	4.68555	6.23506	1.28806	3.08299	7.05471	0	15.8371	6.36648	0	0	7.47821
P00747	92.1029	87.2697	130.554	98.4278	88.8998	80.6926	87.6976	77.4037	75.004	69.8368	60.8274	126.462	66.2791	70.8111	100.377	53.3318	43.7883	54.1569	48.3083	55.7736	43.1901	35.9892	39.8391	37.2563	34.6392	112.602	34.8448	31.3542	31.2054	29.786	30.2373	32.4502	34.1259	101.146	103.823	97.4191	102.114	92.2462	92.9201
P00747;P08519	8.22636	2.46394	2.20894	5.50174	4.09241	1.93474	3.57621	0.275915	1.43022	3.57649	1.88961	21.7599	0.673214	4.07533	10.3678	1.84783	0.784365	0.147749	0	0.55361	0	0.649744	0	0.211877	0.407456	13.1189	0	0	1.14498	0	0	0.482834	0	4.2044	6.22164	7.04918	3.36558	6.50088	1.97877
P00748	8.11502	10.28	19.7292	13.5439	11.2612	12.9493	10.3615	12.5602	4.98472	12.9239	3.33386	23.1097	6.1191	11.0475	14.3735	6.39124	9.24754	6.88041	6.50515	7.40484	6.84402	4.07822	3.69358	5.24746	1.88778	13.4526	5.88423	4.22092	4.86929	4.54308	3.86217	6.52451	5.8525	13.8206	12.4181	8.55997	10.928	8.52981	14.7504
P00751	91.6586	97.8815	123.368	86.2421	86.1641	89.0009	75.4419	75.6409	76.7874	76.4127	70.6425	125.323	65.3196	77.2103	112.441	52.519	51.9402	54.7853	49.8329	66.5973	45.2157	41.7071	42.918	41.4559	39.6395	106.514	36.6802	25.6429	35.172	35.8819	34.6869	34.1705	31.9142	111.063	85.6326	102.496	107.749	95.0777	97.5945
P00915		0		0			0	0					0		0	0				0	0	0	0.330585	0			0.308872	0		0	0	0.292177	1.70633	0		0		2.10034	0
P01008	48.1858	60.5098	84.562	51.7362	37.9963	39.3937	33.34	31.8842	33.7783	36.2083	29.7494	109.248	30.325	35.5322	70.3929	23.7767	23.3828	24.671	23.8225	27.2793	18.6519	16.1019	17.3427	16.823	15.8963	66.8725	14.9769	14.4387	16.1475	14.5226	14.6182	14.6566	16.2592	67.6364	61.1631	60.264	62.8357	56.3693	50.9122
P01009	491.379	485.876	841.398	473.733	422.581	375.058	336.986	319.812	294.014	299.09	278.232	967.031	249.6	252.782	704.144	207.681	180.881	196.323	178.852	219.037	159.143	133.812	134.882	133.262	124.215	665.994	118.782	122.774	117.977	112.641	112.33	110.82	114.149	632.222	551.69	574.903	578.491	518.817	514.73
P01011	94.1932	83.6677	159.357	85.9068	81.2085	74.7258	61.4336	60.8797	55.7367	58.453	48.0343	189.266	56.3191	65.8082	117.912	42.3355	37.0524	42.6672	34.3572	43.9542	30.7721	30.7961	27.1334	23.8195	22.7337	114.359	26.5202	23.4577	20.7314	20.2239	22.0692	19.6857	23.827	108.793	100.718	85.7733	109.291	92.1984	85.3363
P01019	30.1866	37.1447	68.6851	40.7173	28.6891	27.6691	21.2817	28.7917	32.2862	20.0512	26.3065	54.5574	22.6689	23.7708	56.7832	14.2428	18.8824	18.8775	17.7048	18.4389	9.70816	14.1072	14.5903	8.68217	12.3202	46.6021	9.66806	12.256	9.5981	9.15638	12.0905	12.5609	10.4603	42.5373	46.6792	43.0687	36.7477	34.563	38.847
P01023	219.487	210.951	325.669	219.935	192.858	171.876	154.571	152.867	143.317	143.781	128.589	364.024	126.75	133.51	293.065	97.8275	96.5864	96.8068	93.9814	109.377	77.9138	68.7081	67.6124	69.7386	62.4992	290.591	62.7606	57.6062	56.9133	58.2566	56.8486	55.4287	59.6434	271.414	240.376	238.272	265.37	228.194	220.604
P01023;P20742	316.438	210.83	289.02	225.532	207.914	211.841	164.065	148.585	187.961	155.394	126.541	473.42	107.457	170.529	372.449	83.6204	116.076	93.4287	88.2089	106.337	60.7757	70.4487	47.5374	56.3167	62.9416	366.932	48.3039	50.511	45.6205	42.255	42.6849	50.4918	48.3894	298.839	338.171	325.112	350.99	286.514	247.85
P01024	226.397	239.607	347.179	226.275	217.808	195.108	184.205	179.626	165.592	172.451	148.992	400.216	145.594	153.263	310.817	116.194	117.151	116.06	110.355	125.267	91.0111	85.7165	81.9292	77.9244	76.0681	293.565	73.6034	71.0682	70.0647	66.6188	65.2291	64.1826	70.6015	291.851	265.436	261.37	267.137	242.813	236.431
P01031	11.2267	15.5653	22.2475	19.794	12.6514	12.4394	11.5211	23.3488	11.6202	13.3122	8.41263	37.5978	12.3505	9.8547	43.7806	16.6246	9.32462	13.2337	7.66107	9.30567	6.08914	6.00526	5.4213	5.3082	15.6377	21.3092	5.86424	13.0182	5.65209	6.29221	9.29917	8.30846	4.5107	20.0819	16.8431	18.0795	22.7048	17.3555	23.8713
P01042	3.71824			0							0																						1.27026	34.353			8.38324
P01042-2	140.33	187.121	135.434	139.488	181.439	133.948	103.441	116.34	131.64	124.6	98.7645	134.431	104.931	100.788	135.536	112.434	121.858	121.508	95.6951	105.483	77.9834	62.5846	85.4641	65.4185	85.074	136.685	57.8205	61.5074	79.2956	57.836	52.3642	51.8623	62.8184	145.651	126.212	127.375	142.223	179.693	133.558
P01042;P01042-2	90.0109	116.847	168.835	97.7387	95.7819	76.2273	80.3785	73.4178	67.4604	68.556	70.2059	177.514	67.4006	69.5181	137.406	52.5676	47.899	49.5682	43.1972	55.6544	44.4634	37.342	38.9301	34.8414	36.774	136.129	29.5751	29.4228	33.1828	28.6648	30.0312	27.4725	32.3139	137.392	108.191	136.133	113.235	114.02	97.9497
P01344;P01344-2;P01344-3	46.7795	21.7205	0	18.5542	0	8.10711	7.71283	11.4351	3.65927	28.5435	0	58.8924	0	13.0956	12.5023	11.8581	13.8215	13.2996	6.59118	0	0	0.684957	0	4.66877	11.1085	75.2194	0	0	8.51345	1.01127	6.59101	0	6.2257	65.1555	19.1275	33.6999	103.966	18.4458	0
P01591	66.8555	60.3595	71.8797	62.611	38.9945	51.6851	38.8866	41.3142	31.2373	41.0238	35.5883	85.7006	27.7167	30.9579	35.6167	22.8694	22.6704	27.8126	28.6017	18.7437	20.49	13.618	21.1915	17.6217	19.7858	101.156	17.2742	12.6996	12.9899	16.661	13.2113	15.1799	13.7143	36.5162	58.3681	51.7128	67.1791	44.3758	48.6041
P01593;P01594	0	0	3.38676	0	12.1827	1.38795	0.924751	0	2.69618	6.46474	7.11467	0	1.15213	1.30823	0	18.3354	2.34667	5.73348	5.53156	3.42242	0	8.47046	7.94114	0	3.73121	0	0	0.332573	0	0	0.354624	2.92524	0	5.61299	5.56547	0	0	9.64447	0
P01599	0	0	4.42003	5.83308	22.0351	5.6779	5.43167	0.713625	0	6.05773	0	22.534	0	2.83255	7.82967	3.7383	3.833	5.45224	0	0	0.32977	4.45778	0	4.2268	0.393267	3.91453	0.686805	0.94649	0	0.459597	3.14785	2.1799	5.94515	1.53344	16.5834	5.2969	12.6453	0	0
P01601	25.3783	12.7121		24.0375	29.802	15.4598	35.2572	19.3732	11.4382	13.0622	8.5239	88.2238	6.87781	16.5755	2.63896	11.1789	16.8067	9.30379	12.6583	14.5837	6.42568	0	19.1887	6.47978	3.45896	24.376	8.47554	7.46877	7.72808	5.21969	6.40137		5.26988	65.8019	52.7052	4.62473	63.8993	7.23552	29.5411
P01602	199.929	125.692	294.117	267.417	198.044	113.178	235.76	145.663	168.588	213.757	255.534	249.269	184.691	171.002	158.268	185.404	166.276	179.867	146.543	91.6439	162.302	114.28	30.0234	104.564	113.109	241.363	124.681	78.7253	113.341	73.4148	107.195	121.013	50.5076	256.689	237.11	223.148	309.837	256.974	172.96
P01619	227.572	183.207	299.358	222.054	159.143	155.903	125.799	102.393	85.6609	135.855	84.684	268.103	99.664	95.9017	283.735	69.4254	82.248	73.5097	77.013	99.6517	65.9736	42.8435	63.9076	44.6003	52.801	215.048	45.0418	46.1215	35.8113	43.2265	48.4965	54.3182	53.2119	199.07	201.347	223.025	222.554	194.671	119.114
P01624	0	0	0	85.9629	37.194	0	47.7303	34.0684	40.6145	32.918	0	0	4.06629	0	35.3461	7.47242	0	31.3758	17.0501	7.47439	22.2422	23.8784	11.9265	0.716655	1.45668	35.7907	0.391435	11.7959	9.90288	0	1.09251	5.20551	2.99324	6.3838	143.36	31.1457	79.0009	115.376	30.4153
P01699;P01700	42.1585	46.8122	28.4633	42.9228	26.3881	17.8039	50.07	48.9657	7.25325	10.8217	29.4408	86.7605	27.6443	19.7343	83.6905	31.3047	17.8346	26.2074	9.2979	11.6965	15.3954	13.4879	14.5493	22.3651	10.6367	42.37	16.0857	6.15895	16.2752	10.4617	29.2833	17.9289	11.7025	43.3973	42.6395	32.9986	33.2467	87.505	39.7416
P01701	15.2273	12.9549	54.6665	21.9715	3.67058	26.8668	7.83715	28.7069	16.7198	23.7477	12.8131	16.1827	19.7059	0.83911	40.9403	0	8.88	9.23545	1.82567	9.90165	10.6136	5.96425	2.49629	0	5.2013	28.2129	2.84819	0	3.56095	7.79424	11.4998	4.36137	0	38.9555	25.8272	49.907	10.3026	33.1989	43.6467
P01703	0	0	0	0	0	16.3303	0	0	0	2.35167	3.1361	0	0	0	11.2256	0	0	0	0	0	0	0	3.04256	0	0	5.8962	3.4917	1.32558	0	2.03517	0	1.48551	3.21439	0	7.14009	0	0	0	0
P01704	44.7132	25.5125		37.2573		43.494			32.8823	35.4097	20.2142	70.321		20.06	31.6505		29.2673	20.8621					14.8287	20.2312	13.2519		18.4608	14.4855				19.7877		95.2337	53.1213	22.272		49.481	57.6734
P01706	0	0	0	0	0	0	0	0	7.63202	0	0	0	0	0	0	0	0	0	0	0	0	0	0	0	0.798152	0	0	0	0	0	0	0	0	0	0	0	0	0	0
P01709	0	0	123.827	10.6546	0	0	2.71708	0	13.7459	149.941	0	0	0	0.883364	0	0	0	0	0	0	0	2.12198	0	0	2.25436	0	0	11.1535	4.43557	0	6.21771	5.55256	0	0	14.2602	105.097	0	14.3519	0
P01714	401.952	313.401	298.892	301.803	253.467	247.535	267.175	262.836	256.246	246.364	206.425	305.454	241.652	201.754	284.024	248.244	207.88	190.849	188.607	217.02	164.396	167.101	125.268	181.321	219.326	284.34	127.975	128.323	131.774	161.537	105.622	118.553	111.741	273.138	320.861	284.382	299.909	246.788	266.315
P01718	141.474	190.393		270.863	165.967	223.978	83.5599	194.116	146.796	129.741	172.513	140.527	165.866	111.906	293.637	102.906	79.8356	189.327		95.5206	62.2775	78.0361	105.706	86.5493	136.384	226.611	45.9262	101.68	118.224	83.7745	113.735	105.987	97.6083	111.655	272.384		257.778	275.9	199.08
P01721	0			0						0	0	0				0						0	0		0														0
P01742	13.439	27.814	96.264	31.831	41.6874	21.7056	26.452	0	18.451	24.9499	13.8136	71.3272	22.6645	0	47.3467	21.0295	0	6.12704	6.62647	27.5603	25.7225	7.85968	8.43779	12.8803	9.33129	30.0921	16.03	12.7794	11.8508	7.21809	6.9932	9.10401	8.44274	25.1364	59.4379	33.0928	60.1052	39.9395	19.9868
P01743	34.7849	48.7256	113.136	51.267	41.3522	36.6011	36.0685	21.0257	14.6544	31.2843	24.5065	130.052	5.41528	13.2961	66.7839	14.4176	8.08718	1.52592	4.94137	5.98111	5.685		1.18888		0.639363	60.0138	0	0	3.02123	2.09993	1.23991	0.643447	0	92.8196	44.7849	60.125	66.7168	23.7423	36.2276
P01764	95.1625	130.578	105.832	143.609	63.1055	95.6965	60.956	48.7319	127.083	146.396	83.387	81.7135	149.348	92.7915	75.3784	98.5276	58.6455	42.7084	96.0503	143.667	45.062	93.5681	81.6399	92.6278	77.3544	113.59	80.2963	73.7639	90.141	30.2262	41.1883	71.9879	63.3566	89.8176	186.777	86.366	83.411	98.507	166.022
P01764;P01767					7.31836	0						19.7328		0	0	0			3.01063		0	0		0					0.669231		0					0	0	0
P01766	10.9032	0	7.21509	6.99391	13.6317	0	0	9.5576	13.1739	0	0	25.7216	6.73089	26.7147	0	2.97591	15.955	10.3209	12.0528	0	18.1417	0	17.1697	1.33703	0	2.60217	4.71646	21.8176	9.74012	2.35302	10.212	0		0	0	0	2.33191	3.64789	0
P01768;P0DP03	11.9924	25.4714	24.7259	17.6287	22.6018	25.299	9.53581	16.5357	12.0739	8.73456	16.1269	24.4474	6.41788	9.9055	13.8801	3.20141	4.30403	3.77005	4.13019	8.49861	0.900855	0.793182	3.06822	4.4544	4.36217	19.4666	3.70648	0	2.54524	4.01193	1.67002	4.34095	1.55731	13.7252	4.19494	17.0425	33.7199	17.1262	11.7418
P01780	47.827	32.1055	60.9003	62.5907	20.5311	37.8183	39.5013	22.6332	32.3328	30.006	35.594	131.29	45.903	15.1027	124.415	23.0239	21.962	26.5406	20.9063	20.5713	25.4118	9.99474	19.0996	7.15255	17.1676	41.2514	11.4536	12.4651	11.1859	16.2207	11.1475	15.0818	12.7359	63.2846	59.6821	90.8657	97.3085	104.049	48.7783
P01817	2.49702	0.377471	17.2081	8.83962	0	5.2067	0.317227	1.91046	0	0.356217	1.07751	23.599	0.345582	1.3841	8.51011	0	0	0	0	1.10587	0	0	0	0	0	12.6449	0	0	0	0	0	0	0	8.98698	4.73895	4.01052	10.8033	6.98069	3.19175
P01833	7.29995	0.620168	0	2.68277	2.05217	0.783935		0		0.731685	0	0	0	0	10.0084			0	0	1.00345		0	0	0	0	2.05221	0	0	0	0	2.29035	0	0	0.804861	1.35363	4.54687	0	2.42499	0
P01834	3250.98	3144.78	4409.86	2986.62	2882.09	2578.12	2423.77	2349.89	2211.65	2143.26	2057.44	4126.48	1894.31	2036.71	3713.67	1597.56	1398.38	476.703	1364.01	1605.76	1146.74	1055.47	970.521	947.76	293.245	3728.19	852.706	838.729	814.23	778.103	771.696	784.173	267.045	3596.01	3612.99	3393.63	3295.24	3050	2959.5
P01857	3898.72	3455.55	6385.07	3504.52	3017.83	2495.54	2175.19	2022.31	1904.73	1829.61	1658.29	7346.54	1495.4	1673.1	6345.14	1235.51	1091.04	582.777	1104	1154.87	928.596	883.986	860.569	828.282	788.043	6100.33	785.213	716.627	722.478	716.2	688.305	683.528	758.598	5459.99	5005.53	4522.53	4967.15	3956.03	3675.99
P01857;P01859	142.305	4.12852	18.9605	4.40067	0	5.9907	89.088	116.433	94.292	80.5555	4.08872	4.13616	2.37385	5.89427	95.4317	0	3.77089	4.64789	3.15017	1.07002	29.0221	25.5007	36.3958	3.07025	2.83726	16.36	2.37168	14.9274	3.18941	0	4.78353	0	17.789	15.7359	0	2.23321	162.802	141.58	1.76381
P01857;P01859;P01860	840.81	811.77	1172.35	759.905	847.425	632.505	586.35	520.495	481.81	551.745	433.414	1175.37	417.192	484.911	1034.2	312.564	293.326	306.486	257.902	344.397	228.094	155.865	196.305	188.374	179.982	919.72	173.498	163.037	164.857	162.114	170.681	151.453	182.173	974.215	900.44	897.275	1097.36	863.53	792.755
P01857;P01859;P01860;P01861	8398.38	8376.77	13760.1	7766.55	7087.47	6123.48	5564.21	5026.78	4772.6	4749.43	4049.89	14538	3809.07	4420.09	12450.4	2873.97	2787.96	2893.82	2570.49	2753.53	1963.47	1883.21	1820.46	1744.03	1661.43	12153.4	1602.13	1527.25	1472.03	1450.82	1458.04	1405.82	1591.37	11360.9	10803.1	9753.75	11076.3	9217.01	8194.62
P01857;P01860	6918.7	10459.2	13765.1	6665.92	6191.74	5104.09	4745.47	4322.73	4277.45	4578.09	6161.1	15792.4	3492.26	5908.28	9013.65	4459.92	2684.05	2871.79	2526	2612.67	2942.76	2708.4	2718	1796.99	2502.53	8779.38	1686.82	1615.42	2384.4	1507.26	2323.14	2386.6	1703.47	8555.97	8476.49	7535.42	8649.04	7489.72	7159.01
P01857;P01860;P01861	414.97	406.123	1463.45	544.464	355.354	309.479	277.51	338.233	314.197	231.43	203.343	2234.04	241.348	182.86	1104.62	130.326	171.538	136.068	97.6338	174.655	76.4658	72.855	70.966	68.2223	55.125	944.558	66.157	46.9525	47.5177	42.5845	38.8195	34.6265	60.0103	713.793	672.286	794.616	595.789	497.789	586.659
P01857;P01861	251.329	245.249	578.517	250.535	236.112	203.801	182.31	143.531	149.769	152.857	120.857	915.299	110.591	119.788	551.804	84.6051	61.6987	81.7587	68.0109	81.2326	35.5338	34.8871	29.5593	26.5292	29.6135	455.815	22.4379	24.2436	22.2972	14.4357	15.2745	18.0335	20.0169	372.725	365.996	319.972	416.852	300.616	295.579
P01859	242.111	203.128	377.428	46.722	198.289	176.2	28.1294	27.2955	27.3139	157.344	141.31	430.667	24.1272	109.119	323.477	81.8365	71.9736	81.9185	64.1131	19.9926	56.3102	10.1885	48.4697	43.1556	7.51858	288.584	40.531	41.3583	6.70924	38.3886	6.03607	5.12589	7.26244	240.199	274.967	216.424	268.363	50.3858	216.258
P01859;P01860	172.254	169.495	272.269	199.633	150.037	121.508	107.192	84.4878	89.5212	98.6568	84.0214	302.942	96.7287	89.3779	245.016	62.4416	65.8188	61.7016	57.8957	72.9753	42.2287	39.7715	37.0852	37.7191	37.9288	266.408	33.7886	33.005	34.6367	29.2465	32.6396	31.8925	32.3433	249.534	192.382	222.418	232.999	195.685	174.417
P01859;P01860;P01861	5083.04	4917.33	9654.11	4389.74	3705.73	3369.83	3044.44	2546.73	2544.87	2485	2331.31	12082.5	2250.17	2152.93	9422.71	1671.72	1678.72	1791.42	1628.11	1684.59	1428.51	1363.03	1323.27	1289.08	1183.96	7905.96	1227.94	1236.59	1145.3	1130.68	1101.86	1134.42	1193.24	7040.46	6431.32	6687.76	6637.65	4849.2	5037.83
P01859;P01861	5463.47	5087.58	8849.9	4624.96	4483.49	3664.17	3362.8	2960.22	2704.84	2637.94	2246.61	10160.9	2063.62	2297.74	8081.75	1612.61	1483.09	1605.85	1393.45	1581.17	1125.01	1104.07	1061.01	1022.51	953.075	8040.15	942.39	912.89	868.995	845.615	906.99	848.748	960.269	7344.06	6784.9	6355.1	6549.6	5503.25	4945
P01860	110.333	181.431	165.197	124.044	133.246	106.199	111.298	92.5526	90.313	120.339	81.9444	433.656	93.7152	82.3533	200.959	69.4861	61.8613	70.6174	61.13	64.92	51.06	44.8556	51.8133	51.9051	36.2164	174.365	43.022	40.2452	36.8121	43.965	40.1692	40.6173	37.328	146.742	227.004	133.256	154.596	122.316	120.835
P01861	307.598	399.132	755.572	434.078	377.616	304.514	266.555	226.873	210.567	216.116	203.633	811.906	209.46	214.066	656.054	155.901	156.324	153.246	137.367	145.845	104.661	105.959	113.744	94.108	76.8222	600.932	90.9978	78.3979	94.3091	88.4395	76.7032	86.788	93.4199	688.249	577.836	582.312	606.64	457.321	374.062
P01871	240.493	239.012	385.185	223.067	203.273	182.464	166.382	160.066	130.33	142.902	118.01	467.593	114.328	119.02	345.292	82.4258	85.3708	84.5788	86.01	86.9028	68.1234	58.3216	59.7387	59.0943	55.9839	312.741	52.9299	47.2015	50.4965	44.3681	48.7662	43.7851	55.0048	320.68	238.499	258.164	302.935	240.847	234.873
P01876	1283.72	1231.4	1766.3	1293.72	982.099	856.439	852.282	888.6	760.443	758.951	887.458	1855.21	722.266	745.841	1383.19	627.117	622.339	529.019	539.912	643.281	441.692	388.98	377.198	340.292	338.142	1687.37	348.205	366.024	337.104	314.034	323.419	295.96	364.803	1428.32	1367.4	1301.02	1220.56	1115.42	1087.84
P01876;P01877	1818.72	1810.97	2579.66	1298.78	1623.24	1314.35	1140.67	1305.42	1060.24	1173.44	887.035	2680.58	791.2	887.803	2154.95	665.494	606.654	613.083	588.965	736.382	501.111	466.199	521.197	419.852	404.418	2174.22	413.213	419.991	380.398	383.256	395.386	407.87	403.129	2098.97	2372.12	1944.93	1736.38	1860.72	1738.8
P01877	33.8269	46.3045	66.5628	34.6576	44.6428	28.192	25.386	25.8858	23.3784	23.4586	23.0517	90.9997	18.4118	21.7358	73.7829	14.3774	14.1476	13.51	11.5867	16.2933	11.4767	9.39836	9.86754	10.5914	8.72042	60.8123	7.372	8.58247	8.31212	7.33182	6.9307	7.46092	6.87878	50.1032	20.5432	39.0012	50.319	47.7899	34.9408
P01880	12.1162	12.5252	33.9545	14.6589	15.4277	7.91372	8.267	10.7045	7.86642	9.76399	7.03389	28.2271	9.01347	10.7511	23.8416	8.09765	3.67425	4.99889	2.91987	6.64267	4.428	3.82846	4.30713	6.17251	3.66819	19.9778	5.48327	4.92554	4.86414	4.39229	3.80247	3.56935	3.20441	21.037	10.6073	17.8031	16.8721	19.1302	11.2038
P02042		0								0		409.457		0	0			11.0498									152.986							0		0		0	6.73525
P02042;P68871	16.4435	22.9796	34.4639	14.3696	12.1886	23.9924	12.1345	13.3046	11.2658	11.2929	13.2204	46.7474	15.8073	11.2023	31.792	8.94919	10.6354	8.79632	11.5029	13.1603	16.7523	8.18739	9.05741	12.2089	17.1462	32.9663	6.58334	5.58198	5.49636	11.2986	6.97549	5.99815	4.95885	25.0324	19.3242	25.2233	31.6835	21.6569	14.9294
P02647	1269.71	1217.57	2026.88	1183.59	1132.48	1014.41	915.852	844.385	866.958	790.315	725.15	2369.57	694.545	722.678	1731.18	574.37	556.445	548.263	526.246	588.378	394.085	377.953	359.38	372.953	366.846	1694.98	342.486	318.959	311.88	280.78	305.348	274.513	300.422	1592.59	1473.87	1426.98	1397.97	1309.17	1225.7
P02649	56.3653	72.3197	88.8393	45.0633	52.0343	51.9674	47.8579	50.0232	38.0744	41.4109	35.4187	86.7867	36.6853	45.943	59.7958	30.3551	26.3572	26.9449	33.1184	34.5255	31.9765	18.4693	21.9246	25.8494	18.4565	64.6592	18.2191	19.9537	21.9991	19.8444	28.0345	22.307	15.0756	50.1156	38.6636	77.4001	58.8735	48.6957	59.0569
P02652	1081.86	1082.58	1257.43	983.693	983.426	909.039	833.71	834.268	707.467	717.512	695.366	1385.26	691.861	686.555	1184.32	500.703	531.695	519.677	496.439	588.382	425.203	414.832	388.7	388.948	353.458	1240.43	361.857	313.244	316.601	307.838	306.573	288.176	332.227	1217.27	1195.1	1143.29	1166.31	985.587	957.937
P02654	85.7921	96.3817	120.902	88.9744	87.8867	83.2826	74.1256	87.1401	74.2022	86.3951	63.9276	119.806	67.8549	67.6252	114.501	50.3263	61.8559	59.5424	49.9598	54.1713	43.4383	42.8282	40.0638	45.5378	37.1505	120.08	34.8698	30.8688	36.7326	35.2206	36.427	32.1629	37.8189	103.515	91.2652	96.3487	103.51	112.16	107.049
P02655	230.455	203.615	280.454	157.547	181.101	160.425	163.86	112.591	101.935	103.972	95.0327	409.281	132.383	121.876	215.773	83.4766	81.9413	84.5823	73.136	133.51	73.5115	77.0812	61.2523	62.0239	47.8624	261.292	58.5114	64.9769	56.5186	48.4638	26.0267	37.4938	91.4525	267.412	243.718	195.899	216.244	224.796	209.901
P02656	53.4806	44.8174	122.274	45.0629	45.1378	56.5656	30.0107	38.4295	29.0183	39.0024	28.1028	153.213	20.7062	19.8687	75.368	26.0387	20.8729	25.8999	20.1189	24.7253	13.7822	12.5917	17.8391	17.5047	11.8653	118.781	15.5587	14.6742	12.4246	13.3228	13.366	12.2158	11.4281	110.566	66.1796	62.0216	58.7174	48.1361	62.5461
P02671	21.8981	27.3651	22.766	15.8497	24.4516	25.2464	25.0007	5.24486	21.967	23.0401	20.8931	29.9888	5.92742	20.1235	11.6705	4.01022	4.22235	7.67899	27.3046	8.21881	9.64236	5.74312	11.4585	21.5507	10.0029	24.2951	16.3515	20.1103	9.88546	5.24959	2.31672	8.93578	22.2916	36.1631	24.5017	29.2301	7.85309	19.5907	64.486
P02675				0	41.3153		10.884	0			5.92632		0				0	0		9.21452		0					2.94035	0	0	0						0	0	10.5637
P02679;P02679-2	0	0			28.6225	0			2.53939		0		0			0					0	0		0.966201	6.39095		0	4.15607	0	19.2119	0					3.43751	0		0
P02741																		0								0
P02743	114	116.471	121.957	70.0489	138.299	94.8591	109.096	98.2694	92.9369	154.849	89.3522	35.3779	87.5829	133.141	161.095	83.8514	84.2753	64.7466	63.0918	61.8453	48.2484	61.9388	62.7476	37.3604	29.652	116.453	43.1209	50.6265	23.0665	34.343	56.6939	37.099	28.773	77.4926	90.0784	151.35	178.37	177.463	122.415
P02745	37.2988	33.626	47.5323	25.1168	38.6627	36.2087	42.7882	11.1203	37.4826	36.1387	37.0058	58.0992	26.7649	16.2111	43.8017	16.4318	19.73	15.061	27.0132	16.42	16.8973	12.483	17.4114	4.82195	12.1254	64.6166	9.90293	12.937	18.5822	15.0432	13.3903	10.4068	17.5544	34.4714	72.3331	37.2328	32.8486	25.6801	49.1603
P02746	45.5994	45.3309	85.5244	48.6207	42.7666	43.4659	40.6315	37.9933	39.3799	36.3066	32.4064	73.1089	33.6888	34.0144	72.8128	29.3652	24.6066	22.0687	27.0348	27.1203	21.1731	21.6317	15.247	19.2127	15.1087	74.0024	14.3642	15.4438	15.1906	15.6954	13.1878	16.7514	15.3795	61.2564	64.0069	63.9778	76.6076	59.6119	48.1984
P02747	45.8382	51.4341	117.255	63.5088	75.3338	53.6046	54.5178	53.0761	62.8212	38.5094	52.8062	105.757	32.4345	41.7621	100.972	35.4293	29.3864	33.0088	17.2721	26.8103	26.2299	24.3903	22.5347	25.6934	18.1574	78.9369	23.1915	12.5487	20.4841	11.1795	16.8187	25.5866	16.831	114.768	84.9128	72.7776	83.2722	73.6422	39.8376
P02748	66.5801	87.3488	100.91	66.1946	63.5838	47.0231	65.6401	54.9567	52.6557	63.8386	49.8058	93.2569	40.1094	53.0416	90.3249	37.6147	34.5511	46.6411	36.1995	34.2303	29.0984	29.4433	19.4381	24.5375	24.8632	98.4537	25.3249	27.5041	19.3326	28.9492	24.5592	23.8496	43.5309	90.2127	78.5336	95.6412	60.3843	77.9529	72.9487
P02749	103.085	124.481	221.155	113.809	106.609	92.217	84.4269	80.4457	80.7443	78.4218	72.1894	260.22	76.0712	63.7111	193.321	48.4427	52.1151	51.1193	43.6326	56.5119	44.3083	40.2377	36.9167	37.0791	34.3838	185.866	33.3489	29.6106	32.3866	29.4581	30.5152	26.3695	32.058	142.008	121.725	142.227	139.057	130.903	120.608
P02750	66.9504	57.4677	70.8105	68.1225	63.7324	48.8486	64.2006	52.1654	36.2412	33.9292	41.7271	99.1038	54.3142	43.723	59.6216	33.348	32.2562	34.9785	28.836	37.0343	19.8964	23.5904	25.2004	20.3983	21.6466	61.4512	16.3158	20.1969	16.1451	11.1295	20.867	15.8977	21.2891	68.9103	75.2635	98.7513	57.1441	60.7387	56.5693
P02751;P02751-14;P02751-3;P02751-8	41.7379	40.5829	56.7974	44.1653	44.6773	31.4589	33.8414	29.2195	29.6405	28.9646	30.5722	70.4567	24.6749	28.8493	55.3702	21.6082	21.0546	19.1596	29.9522	24.0984	18.3055	14.093	15.4409	15.7841	12.0995	55.2943	15.5766	16.8233	12.7143	13.3062	15.9367	11.9241	14.1426	52.5585	47.8834	52.1816	48.5453	45.3577	38.2403
P02753	39.7138	19.1245	47.5126	33.2223	29.7707	31.32	28.6273	28.6459	28.4451	25.9321	20.597	93.6818	27.8538	28.5275	49.3417	22.7158	14.0139	27.522	22.2103	23.0002	13.6671	11.3739	14.3996	9.75435	8.02043	44.3705	13.7006	12.7698	9.81326	9.00285	14.9576	13.9947	13.3774	40.8312	38.5408	37.607	57.0724	31.7362	39.4111
P02760	54.7424	62.6221	79.6945	63.0875	51.4597	42.6496	41.4675	44.5999	39.7526	36.1334	28.5487	110.872	31.0847	35.6423	79.2106	26.2489	25.0988	30.3709	24.0783	27.8614	19.3241	17.7037	19.3528	20.7116	16.3637	88.8393	16.9999	15.2012	18.2775	15.207	11.9671	17.656	18.2669	82.5049	59.4478	62.9891	71.3846	62.4135	50.7782
P02763	298.689	298.936	646.787	344.035	283.694	240.345	231.237	205.957	212.968	203.104	177.758	718.681	137.781	169.983	626.655	114.219	143.348	111.318	101.728	133.168	103.966	89.303	103.506	98.7555	71.939	519.325	72.3648	74.074	66.1295	72.4698	66.9966	77.1047	87.0071	490.639	445.609	435.302	475.6	355.865	301.093
P02763;P19652	666.911	680.686	1037.15	643.363	645.687	559.314	541.954	499.947	486.412	492.14	424.655	1299.71	430.263	374.75	792.623	325.265	320.761	354.82	335.758	342.724	282.208	282.974	238.476	268.181	268.63	699.025	215.369	243.953	219.612	216.174	194.892	222.508	212.953	827.138	759.529	709.398	741.108	646.194	648.078
P02765	235.142	218.525	334.225	245.922	209.11	198.105	163.338	155.497	131.962	153.601	122.002	459.996	133.386	131.398	343.518	93.4825	92.0448	98.7932	83.9432	106.914	66.4276	69.8561	58.6166	57.0845	53.5247	312.266	52.4205	52.2927	50.8318	52.1487	50.5841	44.8201	57.8035	344.487	255.801	224.035	323.014	281.249	215.698
P02766	48.327	33.6756	55.7142	30.3902	33.7507	33.2872	28.5175	28.2948	19.4884	24.9343	24.4992	80.8583	16.1362	17.5421	87.8331	12.6652	16.4389	13.5745	13.7254	16.92	13.2456	8.7545	12.0888	10.5067	14.5582	74.1096	13.8493	8.89211	7.19014	10.2256	9.44351	9.91848	9.24784	56.8755	54.2466	39.9425	40.5101	52.5973	35.0294
P02768	10088.1	9937.06	13844.3	9493.13	8821.79	7968.13	7448.55	7004.43	6749.77	6688.54	6118.53	15579.1	5720.54	6098.02	13053.7	4802.55	4611.37	4852.15	4449.47	5308.98	3769.12	3566.3	3279.93	3368.27	3293.64	12775.5	2995.36	2914.85	2793.06	2789.33	2775.49	2663.26	2657.79	12016.8	11651	10906.4	11263.9	9435.66	9273.67
P02774;P02774-3	179.166	195.556	247.169	187.489	175.403	155.266	151.832	139.79	136.177	135.38	128.598	288.691	121.84	118.798	244.584	98.8672	96.0864	95.3649	88.6888	115.058	80.9244	74.5475	69.8786	73.8111	66.7054	221.627	61.8912	60.4781	63.2849	57.8245	55.4193	54.9588	60.0331	223.478	218.515	199.585	206.911	194.075	175.581
P02775	0	1.66975	4.55398	0.323058	2.34331	2.15561	3.2715	2.34528	0.706668	2.18724	1.95443	4.12118	1.67152	1.47471	4.6257	0.214066	7.56327	3.34616	0	0.952674	0.969068	1.63253	0.425267	0.0882123	2.99686	0	1.67796	2.07919	0.36352	0.21828	2.53337	0.137091	0.285169	5.92137	0.85964	1.36732	7.89172	4.49175	0.66095
P02776		74.004					0										0																0
P02786	0	0	0	0	0	0.530887	0	0	0	0	0	0	0	0	0	0	0	0		0	0	0	0	0	0	0	0	0	0	0	0		0	0	0	0	0	0	0
P02787	702.571	700.798	1025.15	650.305	610.336	541.441	497.363	481.067	462.651	465.208	413.741	1172.22	378.711	422.477	955.917	302.157	292.569	307.293	284.911	335.212	232.541	214.63	201.924	198.131	197.421	897.336	184.075	183.202	175.849	167.864	165.934	160.704	175.031	836.373	793.09	771.906	830.696	682.708	670.256
P02790	261.892	279.697	518.641	251.426	228.467	203.844	179.485	182.077	161.281	156.92	145.506	670.939	139.929	136.661	459.865	110.689	94.9841	111.997	98.1916	110.171	78.2399	68.9967	71.3657	67.7199	59.5961	456.656	54.8729	56.7152	52.5408	56.8704	51.6507	49.2728	56.6188	373.72	349.153	334.587	353.192	289.495	254.796
P03951;P03951-2	14.4338	8.4121	21.6896	7.98873	5.3105	8.94032	5.82972	12.02	6.69904	4.93517	7.45596	12.0798	3.03245	6.6848	23.8948	3.41723	5.44602	5.00445	6.58808	2.78935	4.33569	4.65557	2.11332	2.66669	4.18483	17.9908	5.26113	3.14036	4.09725	2.76558	0.962883	0	0	6.91013	11.161	11.613	17.0711	1.97248	5.45293
P03951;P03951-2;P03952	1094.58	1258.55	1854.76	1117.84	1032.89	814.324	749.771	662.042	667.549	607.121	543.052	1950.88	471.026	532.369	1706.09	411.689	357.216	413.244	333	353.339	275.279	262.673	256.961	255.617	252.008	1597.29	265.852	234.871	235.757	226.2	220.42	212.354	246.678	1327.62	1532.59	1281.03	1597.56	1124.69	1148.5
P03952	125.008	112.29	183.574	133.167	104.91	84.7802	93.1848	64.2512	77.1148	82.2926	75.4836	171.86	71.1639	71.5833	178.547	74.8794	56.0682	64.3276	57.5804	22.3171	51.7671	49.4565	44.3981	40.2674	43.7702	138.477	15.1274	43.3159	40.1175	40.021	49.574	49.3747	39.518	138.751	129.463	125.552	125.521	132.225	115.013
P04003	54.3385	69.2298	82.6808	60.5864	58.704	43.9797	41.1766	50.2364	41.6542	37.5497	36.4253	96.5521	41.1219	44.1818	71.8464	28.0939	27.0278	28.0065	27.1737	32.9927	25.1514	21.2469	20.9115	19.6559	22.0562	66.05	17.5051	18.4912	18.1524	14.8803	16.3815	14.4933	15.9865	68.2055	68.2665	69.1385	72.2265	57.2242	63.4718
P04004	152.207	134.162	228.332	145.353	130.86	118.847	123.433	108.673	85.0001	116.087	74.4484	307.387	87.5436	94.681	211.155	67.9462	58.7289	67.8062	50.6446	74.9489	49.7795	48.8346	47.9434	41.7001	36.0697	224.204	35.2034	41.314	41.9365	37.1408	45.6754	42.0631	38.3868	184.178	201.785	153.444	165.452	168.306	160.288
P04070;P04070-2	0	0		0	0	0	0	0	0	0	0	0	0	0	0	0	0	0	0		0	0	0	0	0	0	0	0	0	0	0	0	0	0	0	0	0	0	0
P04083	2496.74	2253.88	3871.5	1944.22	1730.14	1391.55	1364.29	1041.73	1064.17	1038.21	982.519	4412.59	1000.09	923.466	3585.96	766.302	739.286	749.247	675.544	700.71	559.355	568.926	533.258	555.967	547.226	3486.25	525.102	525.361	465.782	480.981	495.369	502.8	553.576	2927.94	2965.84	2686	3119.27	2159.68	2411.35
P04114	45.2244	54.6439	87.9218	47.518	48.3088	38.6458	33.3272	36.1222	46.1029	37.0846	27.6783	107.22	31.1848	40.5629	76.2786	28.3325	20.9558	24.0962	23.2975	25.0102	22.1036	22.3757	17.9915	17.6655	16.8237	67.8583	15.1792	17.8439	14.133	14.4979	16.5262	14.1919	16.9361	70.9726	58.8197	56.6345	54.9065	52.2442	48.2498
P04180	20.0388	40.7931	30.3145	10.4196	0	12.589	20.2986	21.7642	20.6373	9.91943	4.90173	10.0952	10.4176	13.7753	33.3318	27.0335	14.5151	13.6024	4.17231	13.2599	4.0607	5.99667	7.71159	11.2249	7.28744	12.0175	9.86907	4.33066	8.88091	9.74704	5.13385	6.02284	6.51149	31.9677	23.4278	19.3074	16.2716	22.0472	0
P04196	30.2226	27.5686	45.9155	28.9368	22.694	21.8685	23.8985	20.3983	19.5381	20.714	18.6617	54.8849	18.5523	22.4034	41.7443	16.0185	17.1629	13.8828	13.9442	19.0085	11.3545	12.3704	10.5166	11.9895	13.7553	33.662	12.1798	10.2597	10.9094	9.85552	9.54671	9.7913	10.2687	32.5995	34.5885	30.5942	35.537	31.7464	23.879
P04217	104.555	115.727	177.372	89.673	93.6391	96.8209	71.3665	78.3808	86.0525	69.1236	60.1237	211.736	59.2775	86.4779	165.137	55.9093	51.156	40.995	43.5899	58.3937	37.4704	37.8706	31.9987	26.7602	41.8134	115.125	32.143	36.6794	28.8849	27.1116	27.1035	30.7297	27.898	143.479	104.096	117.056	154.53	112.697	109.849
P04275	8.47915	18.0505	10.1224	15.9051	16.0644	0.444991	1.00623	3.40089	20.1727	5.40977	10.5044	13.5162	11.5298	5.97702	9.49479	4.61779	2.15101	1.42357	6.86141	1.79328	4.57619	0.552787	3.7534	2.0052	1.85654	4.26661	0.910144	0.0491604	1.78401	1.12333	0.189377	1.84795	1.3258	15.1548	3.04913	3.17077	18.3078	10.9025	13.3093
P04278	0.712094	0.287011	3.33731	0.791318	1.31498	3.67191	18.0063	0.0637814	0.639423	0	0.212423	2.42409	0.774263	0	1.34144	1.00493	0	0	0.0616425	0.227464	0.958406	0.400053	0.14194	3.23862	0	0.311633	0	0	0	0	0	1.2882	0.785375	1.91919	2.46077	1.35234	1.22551	0.786233	18.4103
P04430	0	0	17.7242	0	0	0	11.6119	2.09024	0	0	0.91262	14.066	0.54797	0	6.3624	0	1.31014	0	1.4038	2.48082	2.66217	3.07665	0	3.72214	2.3602	9.9163	3.65441	0.553945	1.70368	0.354689	2.35325	0	3.45717	8.99175	22.9201	0	10.1601	3.03672	3.11444
P04433	79.1955	71.055	114.896	86.5943	73.7591	95.2	59.5044	84.153	51.822	52.4135	72.3446	131.314	43.7486	70.9647	156.307	40.1356	44.147	40.7408	47.761	39.6217	26.061	29.8226	22.9425	28.4996	21.5545	161.219	21.5513	20.3076	25.8837	22.8124	18.7488	26.7393	24.1527	117.315	104.374	90.9072	122.745	106.852	97.3749
P05090	150.902	209.002	204.109	191.109	147.844	165.472	129.715	167.435	131.632	144.752	114.963	215.458	122.634	121.893	179.418	87.6169	91.1939	93.3387	109.062	117.695	80.8858	66.3482	74.9387	68.2015	49.19	228.164	65.1603	61.8316	62.6405	36.0699	54.743	62.5724	36.8905	164.354	153.042	155.955	187.392	159.877	194.005
P05154	10.9287	21.8835	49.5225	16.5643	12.8356	14.6104	12.49	12.3998	12.8948	14.3222	9.64981	35.547	14.6721	6.9756	30.0936	12.5389	10.2488	8.08286	9.84828	14.8309	6.81398	6.76541	3.69586	6.33439	6.02445	24.5761	8.79365	4.97417	4.25678	7.09398	2.13659	5.5154	11.4097	29.4023	24.0594	23.8362	39.4474	15.9271	21.4088
P05155;P05155-3	68.7415	70.999	136.683	79.3938	64.9024	58.3108	54.1784	47.547	43.8044	50.7553	47.0459	161.721	40.9954	51.8155	107.497	34.3316	37.7557	37.575	29.2101	31.2247	25.1127	18.9603	20.2106	21.7619	19.6424	114.808	16.7527	20.1588	22.3422	18.2692	16.9671	19.9609	21.881	94.3437	102.386	86.8065	90.8954	89.2287	70.5621
P05156	19.7272	18.4284	30.7225	25.3657	28.2748	27.5978	13.4223	31.2722	13.8417	10.1405	14.583	42.6559	16.8936	16.4172	21.9776	21.5297	7.23514	9.93397	9.29601	11.8845	7.84079	8.34722	8.7573	5.18678	6.93323	18.8897	8.07453	6.05459	6.76839	6.78771	6.15465	6.93217	6.93814	25.1376	20.5577	20.9583	21.6365	18.315	18.063
P05160	24.183	48.2372	37.0056	39.8795	68.2605	14.6643	50.4465	30.4192	29.6733	13.3958	49.4631	29.5922	30.4871	31.4332	45.242	28.4576	21.6067	21.9156	25.2969	2.4518	24.3391	9.62644	2.62471	13.5318	4.2711	71.277	14.3341	11.3105	14.5817	8.30422	1.95783	11.4288	14.6576	45.3641	23.9571	121.433	49.8347	25.2634	71.8488
P05452	27.2112	35.312	66.972	25.395	23.8394	23.3513	27.2711	18.5611	24.5831	23.526	27.2659	87.3546	36.2527	31.5821	67.7811	16.2792	17.9792	16.3582	12.6994	10.7582	10.8636	10.5594	14.6573	13.1251	10.4313	40.0625	7.33365	11.183	19.7507	9.14895	11.7677	9.37306	10.9502	40.9619	40.8636	37.5316	43.9795	28.3666	44.8989
P05543	6.71253	4.91674	9.43071	7.16545	8.67769	6.783	6.34632	3.71241	1.91179	5.45807	3.06446	3.58048	4.12486	3.33497	3.07697	4.07362	3.72109	1.10491	1.07794	0.618343	4.03781	2.60018	0.78648	4.17221	3.40139	1.28583	3.38459	0.646148	0.378611	2.13593	1.66484	2.95114	0.780007	1.8842	0.160106	7.21408	9.09275	6.06116	2.2349
P05546	47.8655	57.5962	99.5541	45.9037	39.0161	35.95	33.3061	34.0577	39.9189	32.0342	26.3453	106.655	22.7125	26.0392	65.9968	20.3118	21.5587	23.459	18.2989	24.7751	14.2893	15.6515	13.9396	12.1731	13.2709	62.4599	13.8464	14.1949	11.0355	14.4677	13.4899	9.65364	13.4467	61.0034	63.096	52.5962	66.7329	51.5721	66.6787
P06276	78.759	21.7541	146.173	94.75	86.4147	81.1281	55.4203	99.0391	52.6964	52.3322	54.9819	135.818	63.2446	36.7619	159.097	13.2616	35.3644	45.1232	12.6964	36.7934	28.1935	38.9675	21.5298	25.7143	23.0203	161.874	22.1899	17.6125	12.2985	19.1323	21.8406	20.0951	14.5802	117.938	78.8608	177.055	178.77	99.6826	138.398
P06310	5.28036	42.4088	2.28552	8.93435	13.786	21.4964	7.4956	22.2299	16.3359	28.6434	28.0417	36.4872	4.35252	19.4023	12.0209	9.13015	9.93835	4.20081	4.30461	1.98017	6.28255	8.58665	4.81041	10.2363	8.17006	25.2597	2.95192	5.39935	4.55003	10.6433	10.3953	6.44212	3.76287	4.89717	34.1579	22.7252	21.9708	24.9732	15.3528
P06312	125.738	105.562	303.592	96.7648	119.343	99.4546	98.1856	89.675	78.1262	94.5543	71.7684	396.742	66.0899	67.0182	223.546	50.87	55.7599	52.1784	36.5987	65.88	23.2454	35.688	27.5092	33.348	32.183	179.124	12.1838	17.4819	24.0453	15.9416	17.2684	25.0903	23.5609	181.224	168.132	157.122	174.853	146.16	116.395
P06396	44.6049	45.766	68.147	46.7532	47.3562	38.0323	43.4196	32.9444	32.418	41.8181	32.3789	81.4328	31.8673	33.355	53.3031	30.8084	24.336	33.8932	24.7581	28.4987	21.6479	19.8187	21.4137	19.0565	18.1533	64.0091	15.9141	16.3829	19.4304	18.1538	14.7645	15.1856	19.1472	57.2229	49.2444	49.7437	61.5242	48.8969	51.8826
P06681	11.2908	14.04	24.657	18.0607	15.2548	12.1598	22.1755	14.6461	10.2236	14.9286	9.94671	20.6969	12.8451	13.0492	20.2847	8.63557	6.62719	7.21856	13.3321	9.67171	8.44632	7.91509	7.16295	4.95031	7.06306	20.3331	4.75084	6.91375	4.68058	6.43194	4.56987	5.13545	7.15666	18.8743	18.3244	17.6057	13.3991	33.0755	9.05423
P06727	115.482	112.701	169.339	103.604	108.972	94.7977	94.6925	88.097	78.1781	87.6485	74.9979	199.466	72.0612	89.6853	143.895	60.5313	57.6811	59.8556	57.974	62.5954	46.8144	41.9524	41.876	39.2917	38.2278	163.182	37.4673	35.7983	35.4403	34.2026	35.1722	35.3964	38.2104	143.433	142.464	122.838	138.672	126.605	118.08
P07225	31.9616	13.5677	53.2988	27.7051	12.2561	10.9468	21.9062	15.7897	6.62938	10.6285	5.58439	29.1945	8.79733	15.1353	32.4458	13.6235	5.07318	12.1653	4.15135	12.1801	7.45647	6.21156	5.04158	7.50528	8.83794	33.1994	7.22248	6.18146	8.64708	6.42806	6.32755	5.65249	5.5424	25.5677	14.2512	42.5337	21.0942	22.5109	19.4781
P07357	18.2621	14.3641	30.5398	25.7418	13.537	14.8584	20.6507	23.3202	33.0487	14.5107	23.6806	38.1886	7.27221	16.4885	29.3933	17.0849	4.56558	15.3989	10.3077	6.94362	1.99268	10.1606	11.1817	13.0633	9.30866	11.3873	9.59298	12.4821	5.95361	7.26796	3.57055	1.54203	4.19122	6.31602	31.0407	34.3261	42.2775	14.1032	28.0646
P07358	26.6069	23.149	21.423	30.6135	21.1768	15.6965	14.7793	2.6328	8.13681	17.0859	15.6385	41.7893	1.76594	14.7855	19.1565	9.39703	12.8564	13.8681	15.1782	13.7717	8.92867	7.64893	7.65646	6.22359	9.54581	21.8573	8.80882	6.58845	1.30482	7.6594	0.426571	6.09975	8.26578	28.0987	27.1274	25.8809	22.8753	22.4524	15.9648
P07359		3.7367		1.88955		3.28645		6.73369		0		34.4667				8.28951		8.43792			8.03534						3.2582		0				2.79909	2.01322	1.47989		3.75799		0
P07360	12.0816	13.7187	29.3377	14.6837	14.6033	8.13414	14.4469	13.9302	6.12302	12.1336	8.85715	45.454	5.77413	11.7418	24.9623	5.32985	5.09288	5.56111	5.02892	6.95954	3.88644	4.30314	4.91874	5.14739	3.78993	20.7116	2.2647	4.3466	5.61062	4.40429	3.30212	2.70062	4.46293	18.5672	18.8811	21.1153	7.96963	14.694	15.6809
P07737																											30.5423
P07996			0				0								0												0	0	0							0
P08185	54.687	66.4882	124.946	62.6038	40.6653	46.0472	40.1709	50.8728	41.5941	44.3068	39.8664	146.967	36.1797	41.3328	75.5604	36.4893	30.0221	32.8379	36.4747	33.6191	30.7227	27.8978	26.1008	17.2721	23.275	90.4867	25.1059	23.879	13.9555	17.0799	17.9404	23.7575	17.5334	89.2116	76.1709	62.3035	66.8795	67.9687	61.3354
P08294	0				0									0								0.506956						0			0.449228
P08519	0	3.89143	7.39965	0	9.4006	0.83286	0	3.17593	2.1743	12.5037	10.2486	1.67901	9.9558	0	0.612215	4.61569	0.84893	0	0	2.41518	2.68014	1.92521	5.53025	0	2.95991	0	7.6894	7.1766	4.84163	1.32636	2.00874	9.97674	6.28301	3.3591	4.34495	1.11157	5.31095	0	14.5562
P08571	1.80468	0.335473	2.39139	1.4021	0	0	0	0	0	0.830962	0	2.81806	0	0.340642	0.380209	0	0	0	0	0		0	0	0	0	0	0	0	0		0	0		4.34922	2.87483	0.294189	0	0	0.294191
P08603	74.96	86.9588	116.596	79.4622	72.8456	64.6322	70.8604	59.1492	51.6698	58.8343	56.0333	126.913	51.1154	50.5304	96.9024	44.6141	38.4587	43.8881	38.1276	45.1876	31.979	28.7867	26.934	30.8871	28.6803	104.53	23.9702	28.8238	24.3034	25.6832	24.1485	25.5754	28.4818	94.5095	80.4339	84.778	95.8041	70.7126	71.2404
P08603;P36980;P36980-2;Q03591	33.0993	0	0	5.56996	0	62.4075	4.74847	0	9.87405	0	0	0	0	40.9325	0	1.30145	8.38005	0	3.90279	7.66594	6.88133	2.60778	8.48129	2.88852	9.21114	0	0	16.5195	12.2571	15.3929	10.7084	7.08169	0	0	10.2255	0	0	18.0919	0
P08603;Q03591	136.893	170.508	241.469	147.962	131.155	124.581	109.333	96.0388	119.559	83.3088	101.531	248.156	72.1849	86.1917	169.229	75.0473	58.7651	59.4828	54.6744	62.1851	57.8902	52.5496	41.0314	34.798	33.0775	194.164	40.2721	28.435	35.051	32.1345	33.5237	33.7699	40.7957	199.243	158.434	186.891	203.359	156.974	148.304
P08697	26.7811	37.5704	45.7065	32.6899	39.1719	29.0796	24.2975	23.4555	26.6861	33.0142	19.4568	47.9262	16.9345	23.1539	49.2523	18.5036	16.7145	20.589	16.5955	22.1107	11.2843	12.8439	13.4158	9.92252	10.768	41.518	12.4943	10.0146	11.6748	12.3814	12.2922	11.554	13.5112	38.7823	33.4988	31.0474	41.4689	28.3858	35.6133
P09871	27.1791	28.2717	55.2424	34.93	31.042	27.7309	24.0212	27.0351	21.9083	21.4499	21.2347	66.133	17.499	19.8616	38.234	18.8525	17.153	14.8511	20.2889	17.0095	16.5858	11.1611	14.7242	13.8898	11.0335	42.3393	9.39402	9.50518	9.74262	11.0988	11.2405	9.14006	11.4135	38.8904	37.9209	32.3005	42.8147	36.2223	33.6778
P0C0L4	30.0014	26.661	77.7781	20.6231	22.3714	16.2318	16.8476	15.8846	12.9828	8.26118	10.5899	94.0818	8.08776	5.82663	49.132	4.91918	5.07637	8.64796	3.74351	6.91075	5.29431	2.41166	3.94158	2.78661	3.5137	40.845	3.28382	4.68594	2.93012	0.473522	0.799588	3.18872	1.74068	44.4504	40.2517	36.8662	36.0922	32.6259	28.198
P0C0L4;P0C0L5	108.569	113.804	166.395	100.923	100.209	84.7123	83.7033	83.8467	69.7661	81.3204	70.3362	189.993	65.3864	68.4131	130.374	53.1006	52.8311	54.6041	46.4279	63.4421	40.8779	38.0199	37.3359	38.2108	36.556	149.654	32.1178	33.0598	31.6639	30.9071	33.6433	29.3755	29.7856	137.713	125.894	127.041	129.561	113.637	110.084
P0C0L5	34.5669	32.4183	90.6389	44.1834	34.9654	35.0668	27.6476	24.3332	28.0372	26.2825	23.4726	131.528	24.2318	20.6167	81.5272	13.5321	18.1241	13.2103	11.2698	18.6379	15.523	11.704	9.7552	8.33231	11.4037	80.6852	16.4553	8.76263	15.0917	11.1452	12.8156	6.72453	11.2649	24.5114	44.3563	60.7611	49.8443	44.4621	36.7617
P0DJI8				1512.69						1786.5																	870.354				514.437	548.163
P0DJI8;P0DJI9	12.0651														0				0											0		4.54373
P0DJI9
P0DOY2;P0DOY3	1447.31	1343.54	1698.27	1581.49	1578.73	1392.03	1451.53	1344.27	1288.16	1347.24	1311.61	2037.64	1602.62	1646.72	1758.9	1306.65	1498.85	1021.01	998.444	1185.29	896.982	814.128	756.951	616.975	772.542	1742.95	941.656	675.356	946.273	687.597	614.218	777.612	614.69	1799.43	1679.43	1653.97	1588.09	1654.98	1624.61
P0DP04	57.4689	28.7627	65.778	44.3488	54.3361	22.9387	44.4819	40.3743	33.2415	20.0142	34.9064	101.858	5.14125	53.2096	111.967	7.20785	22.6466	9.44823	10.285	12.3781	6.24111	22.7034	7.19581	16.1956	20.4159	78.8083	20.3067	11.3555	3.53169	2.734	10.6218	0.14289	9.75555	78.5952	59.9531	30.48	60.6161	67.947	20.6321
P0DP08	135.191	166.314	1391.74	931.072	115.405	238.407	96.945	406.932	106.772	347.801	76.1252	1232.19	339.165	374.446	123.044	196.445	273.41	65.646	83.9419	269.236	197.365	118.063	100.482	159.714	91.4902	885.185	57.2075	195.332	134.067	205.62	35.3864	43.9071	168.619	106.77	960.367	106.338	1324.7	138.001	716.302
P10643	26.7999	32.601	38.9011	28.2003	20.7357	25.0171	23.9585	23.7125	20.8862	19.9006	13.973	58.1815	16.686	18.7801	35.2526	13.5473	13.0861	15.8121	12.4693	16.2826	11.7683	11.9043	11.739	9.86314	11.5021	25.3232	9.39174	8.73962	10.7445	9.12453	7.11324	9.15097	10.5389	39.0834	30.415	31.0179	37.35	28.0716	20.9938
P10909;P10909-2;P10909-4;P10909-5	206.711	205.407	389.449	183.382	167.505	143.425	139.229	121.66	156.474	112.969	124.939	410.984	130.185	124.747	311.464	105.263	93.8573	108.594	90.1588	90.0281	61.3235	74.6365	67.1718	64.5999	67.8013	297.859	54.6387	53.9963	56.9348	54.2164	57.1904	60.7806	65.5817	259.756	260.682	238.022	254.941	230.648	221.867
P12259	72.4631	57.4362	91.7401	40.5873	58.9948	37.8341	49.0419	35.1201	34.171	26.8072	23.4121	109.155	50.5882	46.544	47.5526	17.9866	30.3598	26.5036	28.438	34.2376	17.1912	15.3047	23.7464	19.7439	31.3418	70.9103	9.10492	13.498	23.7213	13.6168	13.8884	15.1202	15.7135	55.0166	51.9459	36.9002	89.7334	44.8421	36.219
P13591;P13591-1;P13591-3;P13591-4;P13591-5;P13591-6	22.4047	25.9158	90.762	92.9075	8.86942	25.8544	39.0069	9.41916	31.7102	13.298		11.6714	36.8229		70.0148	24.9249	12.0009	20.0468		11.6428	8.65571	18.7942	10.8036	9.82131	15.0416		14.6139	8.85061	16.9757	12.0754	29.1488	8.67307		82.4968	16.1204	96.8098		22.53	64.3924
P13671	13.353	13.4183	30.7245	21.548	11.9745	16.2929	16.8595	10.3962	7.48841	7.56405	13.6901	29.4555	9.89411	10.1526	25.6054	4.62395	7.41452	6.71271	3.61974	9.03662	4.30973	6.08561	6.83275	5.31128	5.19593	20.4737	4.98514	2.43256	3.6108	3.04662	4.10017	5.1087	5.09506	20.1846	13.6366	18.1548	17.9347	12.2223	6.35496
P14151;P14151-2	28.0486	27.0106	55.2785	41.1626	22.5469	29.5778	25.4873	32.586		18.3949	10.9795	104.597	24.7601	21.1686	42.7711	28.4144	13.6836	24.0053	18.1591	18.8104	5.13506	6.34566	7.60802	2.01711	1.95245	49.5172	9.00747		4.9782	5.54229	5.83477	4.03583	4.71307	25.9917	53.9036	60.6733	55.6483	37.2453	10.6351
P15169	21.1329	45.6941	14.1633	17.4981	16.328	16.511	18.7077	17.8702	16.6773	20.8037	12.2965	13.7025	11.2416	13.4473	13.7517	10.3048	23.9834	8.93713	13.5355	10.6205	6.21197	8.80442	9.10993	9.09344	7.20067	19.8655	7.07457	10.016	8.0615	7.74017	5.53768	8.08213	3.19477	29.0794	12.4561	18.6956	15.7805	14.049	9.88917
P15814	3.38913	0	0	0	0	0.413621	0	0	0.512023	0	0	0	1.10786	0	0	1.15888	0	0	0	0	0	0	0	0	0	0	0		0	0	0	0	0	0	0	0	1.34472	0	0
P16070;P16070-10;P16070-11;P16070-12;P16070-13;P16070-14;P16070-15;P16070-16;P16070-17;P16070-18;P16070-3;P16070-4;P16070-5;P16070-6;P16070-7;P16070-8;P16070-9	0	0	0	0	0	0	0	0	0	0	0	0	0	0	0	0	0	0	0	0	0	0	0	0	0	0	0	0	0	0	0	0	0	0	0	0	0	0	0
P17936;P17936-2	0	4.65978	30.6612	11.0416	0	14.0747	6.8591	0	8.69325		0	5.69757	5.45471	0	9.0294	17.2115	0	9.3334	5.81306	8.78834	5.9218	0.735344	0	9.64755	0	0	10.5051		1.09367	1.08687		2.55748	0	0	0	8.35348	8.11069	14.1224	27.7895
P18428	14.0029	7.34506	31.5473	22.6613	6.50348	12.8369	13.1742	3.56007	1.72665	8.03679	2.773	27.1137	1.24227	3.81909	36.1233	6.95513	3.35202	3.93891	5.17189	8.64624	4.05431	2.8432	1.61186	1.32399	1.47372	28.1976	2.90937	2.45343	0.503616	1.9451	0	1.35589	3.57823	10.655	7.83597	23.0569	16.4498	27.6097	13.6858
P19652	69.7317	83.808	102.953	83.1826	52.0497	50.5455	63.202	41.3863	61.4962	37.8804	42.4404	141.022	52.4707	50.4074	115.406	28.9983	28.2744	36.5972	28.3905	30.5406	21.9556	24.7319	19.1658	25.4664	22.2631	78.1611	27.3868	22.8411	14.4605	24.9883	15.3756	20.8903	20.2611	111.184	92.5476	116.255	109.501	96.7696	82.8932
P19823	100.933	101.233	142.748	101.249	91.7637	88.8628	77.8393	91.6361	74.3061	79.7547	72.56	178.017	68.8863	73.6766	131.243	51.0572	55.0705	56.4254	55.4727	60.5799	48.4177	39.5512	38.0499	38.0319	37.7821	140.87	39.6305	35.1696	39.8625	31.8049	34.4248	32.8385	34.6913	122.29	134.735	113.815	118.387	107.933	108.51
P19827	191.489	179.719	284.778	165.897	160.555	141.631	123.591	114.456	133.519	117.607	123.234	316.678	104.818	100.16	255.085	86.4507	75.1478	84.4986	83.396	76.0144	51.7461	46.3607	57.4648	54.9201	51.2526	226.389	47.2414	47.3352	37.2557	39.5943	40.9424	41.2684	48.1763	231.611	237.671	203.485	215.215	183.987	170.597
P20742	3.85694	6.16758	11.7963	9.80516	8.41494	0.498089	7.47665	10.1748	5.15198	9.85124	4.67503	9.72031	3.74635	1.87512	8.75079	4.04091	5.15975	3.31233	8.596	7.26325	1.01526	1.91971	1.81151	1.26845	0.949022	11.1505	4.431	1.19995	0.273453	0.807201	3.29892	4.5321	1.18619	11.417	8.74811	6.08841	10.7074	5.07598	11.2042
P20851;P20851-2	5.93082	17.3988	13.969	16.1806	19.2796	14.7552	18.4663	14.705	10.0644	22.1365	6.81872	19.2405	17.7285	7.02271	15.7419	8.66233	3.82744	13.1521	0.7673	4.26808	7.04938	5.82571	3.6023	7.60663	5.7591	26.7441	0.772444	9.25103	5.50126	2.38089	11.9512	3.94192	0.331422	5.49061	4.93314	9.24097	15.2646	3.46581	17.027
P21333;P21333-2																					0													0				0
P22307;P22307-3;P22307-4;P22307-7;P22307-8
P22352	26.1707	31.2515	54.4881	25.7615	29.8933	28.6305	15.3264	20.3097	8.72703	13.9663	13.8365	90.1018	15.8208	17.7439	54.818	11.7763	10.6749	7.83129	14.5254	10.8514	8.76317	8.15884	7.51831	6.74784	3.79004	47.5238	6.92122	5.8433	2.15032	11.2622	11.5783	5.61873	5.91119	32.5944	38.9286	30.229	41.714	24.5302	20.7521
P22792	12.2404	16.457	27.0476	14.0702	16.0477	10.4486	8.58086	16.5093	9.91181	10.8671	8.39386	30.9426	10.1646	9.21529	23.5196	9.93207	8.83311	5.67638	10.9461	5.74203	7.06712	7.16615	2.99503	2.76514	3.33983	18.949	3.76918	4.56728	2.5769	2.43256	7.01107	3.18832	4.22342	19.2476	12.1873	14.8509	17.1179	13.1511	20.8914
P22891;P22891-2	4.74865			0	0		0										0			0													0.625274	0			0
P23083	1.42504	1.63994	40.2097	16.5089	6.9478	9.73367	6.79113	3.79187	6.42468	0	10.8091	25.4681	2.71466	12.9766	22.774	4.47261	2.46373	5.106	2.67845	1.19138	3.82313	8.4466	1.30808	2.39509	1.22569	15.3744	4.70531	5.4265	4.28856	7.90182	0	1.76697	8.95099	20.5683	17.6452	22.7112	8.56683	15.812	6.70873
P23142	24.7111	23.3447	27.5072	36.9314	1.42424	19.2187	20.3896	10.3148	8.33931	27.3981	13.2849	43.4877	22.9568	8.41723	21.2033	2.96143	7.42202	12.5995	13.3973	29.2477	10.8254	4.62277	6.5332	10.6058	9.55553	26.8115	2.87399	11.027	1.5183	14.2773	6.2403	1.92291	1.88548	19.5046	29.717	28.2481	12.0438	30.4224	21.8628
P23142-4	0.63365	0.692499	10.1837	1.6773	0.466902	0	2.53857	1.11234	1.34775	1.87352	2.08735	12.5281	1.87352	1.18297	1.47918	0.988747	0	0	0	0.708215	0	0.890671	0	0	0	4.04919	0	0	0	0	0	0	0	0	0	1.21826	14.0229	6.37578	7.23118
P23142;P23142-4	7.53938	11.0114	25.014	23.2891	20.457	14.5052	15.1131	26.0112	9.94343	21.2546	16.6633	18.0198	20.3679	23.6653	22.3251	18.1046	14.4335	18.6349	14.1894	15.2844	8.94426	10.8398	11.0745	20.2945	9.51443	36.0535	14.8015	12.7078	7.96935	5.11187	8.86618	11.8512	9.8242	24.6542	25.9572	23.2709	22.3975	29.6182	25.8659
P25311	23.6199	23.4371	34.6839	73.2049	25.419	23.1896	48.6572	19.5657	22.6854	57.7119	43.5037	51.3252	22.2853	57.9222	35.2668	10.9643	32.7599	30.2558	37.8013	14.9116	25.9787	25.6472	20.5918	6.33893	6.77003	26.7735	19.628	4.70018	5.31531	18.9892	6.07415	3.40911	20.6021	63.7622	28.0186	27.6632	30.946	24.1256	23.3712
P26927	0		0	7.43505		0		0	0	0	0		7.05875	0	0		0		4.93036	0			1.63191		5.91333	5.6173	0				3.13139			3.51253		7.6322	1.52872	0	4.67567
P27169	59.678	62.8896	90.9621	57.327	47.902	49.2179	48.5504	38.287	45.3783	37.1752	33.1044	116.705	33.8985	33.7247	73.4523	25.3374	23.0309	20.4905	25.5509	27.5166	28.3103	21.2012	20.9094	17.2141	13.306	78.4297	19.9664	14.4485	18.3172	14.4385	17.8076	14.7094	13.0776	66.9276	61.9539	56.6687	72.5156	61.3953	50.3211
P27918	11.2923	11.0543	26.7956	10.922	8.49145	5.76047	8.67413	17.8193	4.13416	4.95514	9.47517	0.430925	11.9279	6.12178	1.22552	4.19481	5.51756	1.22219	0.822846	4.19569	4.95385	5.40634	3.25572	6.02621	2.38198	11.7089	5.31094	4.00757	4.69079	1.96446	1.60517	5.3256	3.70459	13.8452	10.1431	5.8232	22.805	17.4558	5.51379
P29622	8.94522	7.26543	12.7024	9.11068	8.49191	6.65973	10.902	5.17696	10.2026	5.75219	4.57605	24.691	3.58002	6.65876	23.3167	2.74474	3.86189	4.42167	5.06335	3.58182	2.51575	2.17507	3.0088	2.61987	2.52328	21.5983	2.00328	2.15006	1.58753	1.15957	1.62725	1.69053	1.76554	23.7033	15.5536	8.82718	11.7477	5.4605	11.1046
P35542	85.2623	91.4226	128.026	107.165	124.922	112.334	91.6466	91.6455	69.4602	128.605	84.6458	137.056	85.4001	93.359	160.122	62.413	69.4794	82.4021	65.884	50.8229	66.8361	39.2494	50.8175	49.2968	32.0566	95.4766	46.2373	25.9664	28.8275	30.1819	42.0027	42.1875	40.4179	121.854	116.874	166.176	113.231	81.1889	72.4414
P35858;P35858-2	13.6434	17.9593	20.7756	13.1979	14.5252	5.80504	5.56382	11.4061	12.6432	5.58702	7.42785	15.5593	2.36673	9.05049	14.6317	4.16639	6.44694	5.2318	2.97919	1.8717	4.45779	2.37625	3.36347	3.45226	3.24172	9.16271	2.56167	2.71534	2.60725	2.20701	2.29863	3.05815	4.63778	12.9896	9.02528	11.9972	12.5363	12.2442	16.8753
P36955	21.5624	12.7942	72.5746	22.0736	28.8532	26.7383	13.1367	17.262	18.323	13.8776	6.54428	143.186	9.38603	18.0675	46.2396	14.991	9.90407	22.7288	21.7245	10.0312	5.57661	9.86136	12.7674	14.3948	8.21968	54.7919	13.1323	14.8384	7.08568	6.55516	7.69644	9.17513	9.74628	50.834	80.9985	40.5492	42.9202	30.1164	32.2327
P36980;P36980-2	25.7019	30.3268	28.4195	13.6237	24.2569	20.878	20.2824	19.6234	9.93927	14.7017	12.1625	44.367	26.2274	19.2581	50.3724	13.5934	11.3856	15.9952	6.40627	12.942	14.6734	17.4948	16.0635	14.2439	6.36879	47.2199	6.9109	5.51914	4.28994	2.91665	7.55768	10.2163	6.98097	55.2065	40.6086	30.8517	48.9871	32.5071	33.105
P36980;P36980-2;Q03591	31.2003	5.05115	14.7072	16.7502	21.0825	13.138	16.3841	6.64833	20.7606	9.02643	13.4829	13.9254	17.2809	10.4258	14.0855	16.771	2.41411	6.46647	10.672	6.71505	7.73713	7.11393	7.87643	11.2431	8.61837	12.526	5.48829	4.87331	5.20089	10.9117	12.1274	5.81316	8.95056	16.9636	36.6187	0.728153	18.8399	26.7463	16.8004
P43251;P43251-2;P43251-3;P43251-4	266.915	598.32	278.473	258.699	242.285	188.437	262.04	163.713	194.322	204.546	173.16	261.629	180.505	189.224	242.145	147.5	139.567	133.636	168.442	240.469	164.724	127.805	141.151	123.315	207.041	270.988	88.0406	105.834	78.0022	81.1854	123.113	80.0114	201.013	319.407	223.826	277.14	210.194	229.023	264.535
P43652	15.2894	17.6294	23.9401	15.4865	18.8327	12.2843	17.2305	20.5823	15.5031	15.0768	10.7751	29.6284	19.681	16.1049	17.7497	11.2992	12.1552	11.8956	10.8777	13.9205	10.254	11.0895	10.2028	9.91962	11.532	20.7101	7.94593	10.7383	7.48598	7.35427	8.49942	7.03761	9.73583	18.4344	18.96	17.9203	15.9769	22.1206	16.373
P48740;P48740-4	0	0	0	0	0	0		4.44952	0	0	0		0	0		0	0	0	0	10.1504	0	0	4.01568	0	0	0	1.34354	0	0	5.28547	0	0.361852		0	0	2.93673	0	0	0
P49908	8.327	5.1304	32.134	10.5625	20.1858	19.7215	43.5436	23.0376	19.8452	4.78709	25.7508	6.06545	18.8008	6.58595	25.6204	6.21202	6.72601	6.28617	5.35545	0	1.65722	14.1161	18.1438	9.83754	20.1975	6.1034	7.79255	15.1768	22.0149	7.57439	11.1901	6.56035	19.0627	0	0	36.7333	14.0613	0	28.0619
P51884	31.7225	32.3729	42.7452	29.5623	25.1182	27.892	34.058	30.2465	24.6968	18.0109	21.5681	83.4619	23.6442	17.9691	57.0958	19.8697	17.7635	18.0759	13.8677	20.378	14.2824	10.9796	13.9679	14.371	12.4633	67.4446	13.4374	11.6256	10.9866	10.1098	9.90774	9.22268	8.89192	54.6552	42.7829	34.5974	34.2464	41.8022	47.7404
P55056	3.00557	2.53604	5.2913	14.6507	7.88908	8.32876	11.0198	11.4863	2.61984	4.28657	4.11131	3.00641	2.44299	1.93748	8.83915		8.0617	12.8801	5.80781	9.03637	6.46049	17.8525	5.56665	4.63865	6.71979	6.46982	5.5994	2.60969	0.96093	7.86771	7.04718		3.9408	0	12.6881	10.5184		3.08541	6.42536
P59665;P59666	0		0	4.95014		3.63732	0		5.25314	0	13.3797	0	4.87069	0	5.27255	0		0	4.75986	0		6.04162	2.96616	7.04987	1.4643		1.05374	3.72484	3.82007	3.39318	11.8377	0.2568		0	0	0	0
P60709;P62736;P63261;P63267;P68032;P68133	32.1661	74.5479		128.152	84.012	14.5604	74.391	4.04162	2.85757	48.6816	48.72	7.16173	45.3142	1.37882	62.1934	37.3181	12.8802	10.9391			0	11.1866				0	0	21.7261	7.8698	26.2748				25.7183	30.783	51.8864	33.7824	14.1354	21.5156
P60709;P63261			13.6806	6.94058	0.85082	0		0		0	0	0	0	0	0	2.30342	0	0			0	0.818054						0	0	0					0	0	0	3.9527	2.57789
P61626	1052.08	1270.04	59.625	1065.95		1425.24		1204.57		1068.58		3289.66	922.236	900.419	4299.19		6.12037		700.376	598.475	288.735	262.699			467.238	1918.73	439.052	218.504	205.813	399.181	397.676			43.4024	1682.24	3255.34		38.4228
P61769	117.78	124.505		40.3892	144.276		206.702	231.084		101.213	201.97			103.809	73.15	35.6044	0	133.503			93.0368	149.701							50.3739		69.1284	82.9797		1.69688	108.036	103.932	75.8194
P62736;P63267;P68032;P68133
P68871	55.2848	90.2573	83.5547	50.4537	80.2617	52.3092	53.7186	57.1832	49.3056	51.2333	50.8516	77.9648	34.0997	33.551	77.3528	37.9059	21.8963	34.7418	24.8727	35.935	22.8471	19.3286	23.1748	18.3296	25.3892	85.0455	20.0531	21.5201	30.0257	20.0701	21.6332	25.4911	22.7047	54.2925	103.641	69.3586	78.2376	50.5671	82.6888
P69905	13.6549	14.7763	21.6616	26.7446	20.1217	11.6875	11.9567	16.6577	13.9048	9.91175	11.2187	22.0701	14.0644	10.5409	22.9714	7.13186	9.97451	10.3909	9.49037	10.4057	6.67098	11.2241	7.86566	5.12842	8.40739	22.6696	4.69243	6.54432	6.6132	2.55791	3.716	4.50487	5.92915	15.0923	13.9401	17.5325	17.7875	18.8615	20.8709
P80108	8.07256	6.28515	5.43259	9.39091	0.92031	4.41923	36.4172	16.616	3.53388	3.17634	1.80104	21.5344	6.7637	0.431296	12.0117	2.49748	2.04381	0.581996	7.92689	0.93822	1.12309	0.0846161	2.22312	2.02983	2.90812	2.58915	0.622548	8.49263	1.29805	2.95768	1.10587	2.19947	7.52729	4.17006	17.7562	6.54812	4.25949	2.10616	2.24517
P80748	0	0	0	0	0	0	40.4436	0	14.1912	27.8658	0	0	0.767064	0	39.0061	43.2819	0	0	0	0	40.3698	0	22.5948		0	9.32259	0	0			0	11.2319		28.4544	0	0	40.0207	0	66.736
Q03591	22.2994	18.3059	33.5802	17.2782	16.4987	19.9575	30.6307	15.407	22.6815	17.7466	23.6667	62.441	31.4142	0.78557	34.8493	19.1836	28.8352	5.2841	18.2625	12.949	22.4645	13.825	11.2866	14.9024	12.7279	22.9823	11.0278	13.0983	9.91624	10.0055	11.82	21.7643	5.90053	25.4339	30.3006	21.766	36.4968	34.6497	34.1031
Q03591;Q9BXR6	10.3683	4.39831	30.8413	17.7014	12.7844	0	28.7086	10.3087	0	3.2434	0	0	3.12581	14.8036	31.5737	0	22.4495	0	31.8788	19.6014	2.96191	3.18178	9.22905	8.55001		6.78382		2.93684		0	1.16083	1.1589	12.2294	22.3474	72.0805	17.4395	27.0037	7.65915	3.82381
Q04756	48.0516	36.8925	130.024	66.3331	55.7405	47.5224	44.8775	19.7605	50.2112	65.7391	35.6172	89.737	67.2805	44.2915	82.9378	39.2589	42.7198	39.2188	38.663	32.7759	24.0795	25.0341	16.9554	32.7564	24.9011	3.98746	16.6228	18.1957	11.9879	18.8923	2.80697	17.0139	8.23053	65.0841	81.825	109.139	87.9846	54.4366	68.5838
Q06033;Q06033-2	54.2481	43.5853	61.7865	54.4842	51.6952	43.2355	36.7374	41.1834	36.1182	42.5275	37.8458	72.3462	33.4809	26.9724	50.3132	19.5652	23.9555	25.7855	21.5334	20.8726	20.4064	15.8588	18.1449	15.8259	10.9392	80.3614	15.1236	9.92285	11.8238	9.74521	9.9228	12.2741	17.6201	61.8976	58.8111	56.5082	58.6617	53.4286	50.1571
Q08380	16.6128	12.2695	16.4815	9.18993	11.3076	7.52038	14.8034	3.56723	10.5366	10.9535	15.7014	18.9623	1.98665	12.0401	11.7385	11.0338	17.693	17.0896	2.64187	13.7731	6.38117	11.994	16.4765	3.89723	4.87433	11.377	2.70708	5.59543	0	8.28395	6.16321	10.3359	0	13.6133	11.1687	15.4563	19.1474	7.31883	12.2774
Q13790	0	1.49502	18.6665	4.2794	3.30446	0	0.906405	0	0	2.92325	0	4.06546	1.81281	0	0	4.00858	0	0.628798	0.326106	0	0	0	0	0	0	0	0	0	0	0	0	0	0	0	0	0	0	0	0
Q14520;Q14520-2	35.092	42.2141	4.9166	28.7375	30.3831	18.163	0	5.64389	1.85354	5.2594	22.4521	30.6571	12.6606	15.4922	53.9545	5.37027	1.24584	3.35941	4.39723	20.2848	18.6137	7.98466	8.01864	8.13397	7.92065	11.6484	4.09361	6.31316	4.13139	1.23992	6.64963	15.8567	3.70677	65.5643	54.8993	36.5905	32.0115	31.2749	23.4828
Q14624	15.9178	13.2908	30.0519	9.24442	11.4449	17.3696	15.6722	17.988	13.5452	9.67355	12.3985	47.9782	6.78027	11.0891	29.502	4.4284	7.14782	4.0948	7.17446	12.5792	3.20904	5.89293	4.53884	6.22669	2.38959	21.427	3.24488	3.23219	3.11217	4.65907	1.78612	1.53922	1.35179	16.8468	15.4074	12.9067	18.9119	13.8518	16.3389
Q14624-4	81.9713	74.2951	66.1965	68.2094	82.3744	74.1324	56.6264	69.6985	61.1934	86.4172	66.8051	72.5954	62.6363	60.9911	39.8977	57.0673	70.382	39.2707	52.155	56.0261	52.6317	33.4127	46.0996	39.5742	42.5535	81.7586	41.6363	36.1863	37.1847	35.5939	33.8512	34.5869	39.3756	77.2375	68.4138	69.6931	85.0293	80.1886	46.9969
Q14624;Q14624-4	98.1426	113.788	136.48	99.3819	96.9053	84.9365	88.3339	78.6462	83.8834	66.1567	66.0436	153.066	63.2934	75.2849	118.084	55.9069	53.0954	53.1991	56.2749	60.7318	52.3269	43.5159	37.2599	42.8683	43.2114	114.921	40.396	36.9564	38.734	35.894	34.6302	39.1965	34.2378	106.397	114.641	111.866	96.4003	102.512	97.1487
Q14643;Q14643-2;Q14643-3;Q14643-4;Q14643-5;Q14643-6;Q14643-7;Q14643-8	56.0637	74.9022	59.8044	46.2852	55.3307	22.7884	123.509	91.2116	67.0302	91.3758	92.3968	81.4935	32.7948	91.7847	46.8007	51.2443	45.756	59.2776	42.5559	33.1616	34.4704	36.6373	23.877	12.8779	43.4454	59.8933	39.3867	33.3611		33.4968		26.6885	24.9928	43.27	112.758	43.5884	31.5074	15.8824	41.3143
Q15166	133.987	104.714	213.583	92.5867	69.4947	94.2062	77.4798	60.5593	64.6426	60.7759	54.5697	262.053	53.348	46.3915	150.734	37.9471	31.8483	43.159	37.2065	36.354	26.3262	27.6376	22.4847	22.6641	27.2543	156.223	19.7437	15.1108	15.2239	21.2466	12.7191	17.1546	18.3004	137.547	96.5295	121.919	112.593	92.9481	102.492
Q15485					1.05321		0				0	0			0						1.93969			2.6513					3.99055					0
Q15582	2.35066	0	2.98165	0.935573	0	0	0	0	0	0.270405	0	2.99969	0	0	0.394785	0	0	0	0		0	0	0	0		0.776967	0	0		0			0	1.5287	3.85058	1.03834	0	0	0.293838
Q15848	4.06384	32.9703	10.6776	41.0765	17.9115	14.6196	0	43.2881	25.0739	2.58385	3.76703	21.4721	24.9145	47.9993	17.1523	19.4817	25.4214	15.8443	21.9095	3.21849	35.155	24.7642	8.01391	10.6547	8.52795	24.3149	25.0635	22.1264	18.0168	19.4635	8.02563	19.7028	7.07141	5.26825	37.5836	59.3434	43.087	47.8104	17.2242
Q16610;Q16610-4	16.2435	37.9864	50.8208	25.776	21.7471	34.5987	20.33	17.9628	17.0417	17.5965	17.4337	35.0978	11.8475	20.2754	34.2785	16.5026	11.0137	10.7935	8.05069	21.0211	13.4988	12.5026	8.86157	7.85485	6.97329	32.8101	10.8389	8.44048	0.045197	9.90389	9.10614	10.8742	10.8143	22.8717	31.9814	33.7977	27.4935	37.6974	15.7715
Q562R1		0				0			0																0		0.868253
Q68DL7	15.2158	0	43.5576	10.0212	13.8904	12.3569	19.8424	10.7318	11.6894	4.91437	0	9.68864	1.73998	2.32191	12.3023	8.14328	0	6.99495	2.09228	0	2.12343	9.21581	6.67007	3.35342	1.93458	0	0	5.38153	4.74704	4.30326	4.94351	0	0	8.90625	24.9729	0	0	0	18.0984
Q6UXB8;Q6UXB8-2																																					14.6299
Q86YA3;Q86YA3-2;Q86YA3-7	13572	12871.3	14404.1	13129.5	9151.48	10562.5	9005.62	8931.26	8043.07	9016.71	6769.32	15034	6408.24	7526.38	14182.5	5847.82	5223.97	5610.77	4762.4	5884.39	4372.86	4143.28	3934.21	3890.17	3774.86	14503.2	3577.8	3667.38	3430.25	3384.75	3416.27	3184.52	3069.42	12575.8	12897.3	12755.7	12248.6	12291.4	11009.8
Q92954;Q92954-2;Q92954-3;Q92954-4;Q92954-5;Q92954-6	2.9731	0	3.77094	0.375308	0	1.98294	0	0	0.341903	0	0	0.574803	0.3439	0	1.6124	0	0	0	0	0	0	0	0	0	0.320578	2.2344	0	0	0	0	0	0	0	0.531857	0.496843	0.41459	2.20586	1.84853	0
Q96IY4	6.48525	3.03258	6.96998	2.93016	5.48314	8.97218	6.1404	7.01177	6.21288	4.71797	5.19123	22.3375	6.03293	1.01965	0	2.63097	3.06648	2.77931	3.88624	3.15313	2.48077	2.79452	0.355148	2.45328	1.12861	5.4012	2.23952	0.374088	2.17066	1.98614	1.19432	1.15112	0.905475	4.58105	11.5781	7.14945	10.0471	5.11176	10.7838
Q96KN2	0	13.6453	22.4297	3.7915	7.27139	4.43167	17.102	8.3006	0.70319	5.77057	2.84097	17.6597	2.84566	7.06036	31.9351	2.78049	3.02858	6.60007	1.38354	9.8631	0	2.02038	7.61364	0.55707	2.3634	8.3564	3.80899	1.90115	3.7647	3.12743	2.79711	7.11714	6.78127	11.4565	6.4245	9.79733	12.3623	4.88331	28.2131
Q96PD5;Q96PD5-2	27.6635	20.3117	40.7202	21.5536	19.4528	11.6449	13.0488	13.7107	10.0809	15.2573	13.3349	47.407	24.5623	23.5595	38.6587	13.7938	10.4367	24.3127	9.89276	11.8539	11.1301	7.32576	8.20883	12.7199	7.95691	31.9113	9.01609	9.40732	7.99767	4.78909	3.73324	4.92848	4.59207	32.7179	24.6544	22.2638	29.8488	23.8997	21.5668
Q9BWX1;Q9BWX1-2						0				0					0
Q9C0C9		63.5673	195.915			43.4267	29.7393	48.1518	25.3029	22.1124	17.1451		11.919		128.123	5.96638		10.0296	7.58737				1.70388	4.00188	2.07893	136.733	6.15583		1.17276	4.94375	0	4.01375	4.52119		99.4195	92.7927	77.606	73.0591	65.2809
Q9H257;Q9H257-2;Q9H257-3	52.4396	27.3795	47.6621	72.739	2.43621	15.1583	64.6771	83.463	38.769	42.3961	58.3308	46.4305	33.6068	27.2288	41.5158	27.6866	9.57375	47.8465	19.6867	30.524	30.7632	29.1606	30.5988	21.0962	6.4972	36.0543	19.8547	14.3039	10.6774	27.6383	37.6937	15.6315	20.0238	40.5964	38.08	16.4358	79.9319	64.5082	57.1482
Q9HCU4																																				0
Q9NP80;Q9NP80-2;Q9NP80-3	0	0	0	0	0	0	0	2.42067	0	0	0	0	0	0	0	0	8.67625	0	0	0	0	0	0	0	0	0	0	0	0.579773	0	0		0	0	4.97729	0	0		0
Q9NYW8	2839								1192.6																	3281.13						643.361
Q9NZP8	12.6517	8.95941	5.95621	11.31	18.6519	21.4113	13.3453	9.89743	13.2359	9.03721	8.93133	22.4004	1.31741	6.12847	15.2058	12.0483	8.37397	0.782443	3.16494	9.06667	5.19997	7.54867	6.4307	1.7274	3.43056	10.841	5.9769	13.64	5.69228	5.26515	3.41177	4.2173	8.92567	4.4527	69.8505	8.7408	9.2424	21.7485	2.296
Q9UGM5	12.7826	0	80.1645	3.42545	9.94435	4.68284		4.66613	16.4466	9.11819	4.43992	7.68595		1.21793	4.21705	2.96821	2.64025	3.15671		2.66629	6.70711	2.64861	0.725712	0.68337	3.02319	27.7939	5.69632	2.41222	2.34899	2.43728	0			0	3.40772	3.594	99.7045	0.675505	0.63557
Q9UHG3	7.50456	8.95293	0	0	9.17628	0	25.7537	0	0	0		0	6.35616		0		5.34737	3.29227	1.66317	0	3.9399	0	0	3.26155	4.60262	0	5.75115		1.90006	11.9593	4.37941	0	13.1776	15.715		34.0078	33.7251	5.32687	0
Q9UK55	4.15413	3.71357	13.9826	3.49217	2.54563	2.53543	2.23832	3.24542	0.298501	3.31715	1.26525	13.3981	1.42451	1.06734	6.18605	1.0178	0.830257	0.358734	0	0.599665	0	0	0.172726	0	0	2.06679	0	0	0	0	0	0	0	4.64586	3.8448	8.2712	7.8696	3.53944	5.33135
Q9Y490
Q9Y6R7		0	0	7.40873	0		2.23013	13.0714	12.4898	10.5087	0		0			23.7169		10.7079	23.26	3.91078	20.0982	9.71034	4.30208		1.31424	0			0	0		5.1022		0	0			9.7314

## Sheet: 2.PXD025752_QC_STAVER
Gene_Symbol	tQC_NA_NA_379_F1_R1	tQC_NA_NA_348_F1_R1	tQC_NA_NA_318_F1_R1	tQC_NA_NA_308_F1_R1	tQC_NA_NA_206_F1_R1	tQC_NA_NA_257_F1_R1	tQC_NA_NA_175_F1_R1	tQC_NA_NA_359_F1_R1	tQC_NA_NA_165_F1_R1	tQC_NA_NA_277_F1_R1	tQC_NA_NA_236_F1_R1	tQC_NA_NA_42_F1_R1	tQC_NA_NA_22_F1_R1	tQC_NA_NA_2_F1_R1	tQC_NA_NA_155_F1_R1	tQC_NA_NA_32_F1_R1	tQC_NA_NA_63_F1_R1	tQC_NA_NA_73_F1_R1	tQC_NA_NA_104_F1_R1	tQC_NA_NA_216_F1_R1	tQC_NA_NA_369_F1_R1	tQC_NA_NA_297_F1_R1	tQC_NA_NA_246_F1_R1	tQC_NA_NA_144_F1_R1	tQC_NA_NA_114_F1_R1	tQC_NA_NA_53_F1_R1	tQC_NA_NA_287_F1_R1	tQC_NA_NA_124_F1_R1	tQC_NA_NA_389_F1_R1	tQC_NA_NA_338_F1_R1	tQC_NA_NA_195_F1_R1	tQC_NA_NA_226_F1_R1	tQC_NA_NA_134_F1_R1	tQC_NA_NA_12_F1_R1	tQC_NA_NA_83_F1_R1	tQC_NA_NA_185_F1_R1	tQC_NA_NA_328_F1_R1	tQC_NA_NA_93_F1_R1
A1BG	9595.53	9271.41	9747.29	9749.49	12243.5	10338.3	10497	8681.49	11715.4	8782.58	9937.05	15019.8	12013	15551.7	12254.1	16578.3	14217.5	13971.2	14921.2	10399.4	8840.69	9220.47	9757.46	12502	13848.9	13514.7	9532.58	14671.7	10409.7	8923.11	11396.9	8476.37	13913	15620.4	13302.9	12285	9348.08	13098.8
A2M	16480.7	17513.1	20880	21022.5	18344.1	21939.6	28654.1	20852.4	22452.5	17793.1	17729.8	25036.8	35101.9	20407.9	18532.1	34850.1	30856.4	33272.3	23209.5	18244.1	19102.7	20505.7	15589.6	21365.8	19250.7	25622.4	21070.1	31751.2	21943.8	16886.5	23220.4	19082.3	23428.8	21757.2	22922.4	27101	21445.5	24325.7
A2ML1	20073.2			21732.2		24208.2		21806.2		17566.2	17680.6			29148.3	27354.1	31624.2			30333.5			21167.3		27609.9				27673.7		15015.9	27037.9	23422.6	28526.9	30518		28808.4	20601.2
ADGRL2	56562.2				72615.1	69697.2			84683.1			102063	106099					98656.6			59113.1			89969.4		103565	60803.1	95602.1						108005	83099.8			98447.2
AHSG	5706.64	5904.73	6627.29	7497.14	6763.96	7126.59	7515.82	7801.23	8137.7	5371.51	7548.61	11187.7	9879.37	9896.67	7937.56	9925.34	10112.7	9728.8	9855.13	7565.01	6235.57	7699.62	8595.77	8931.69	7930.74	9966.86	6890.55	9276.55	9499.1	6426.45	8004.66	6879.6	9764.98	9979.41	9539.78	7278.46	5418.45	9253.79
AKAP12	102439	99625.1			113541	110686	130403	94179.9	134016	98431.7	105817	166041	165365	183987	143265	174742	161222	169744	173752	113395	89971.6	109806	108598	151644		167811	115507	149687	107264	96144.5	134639	113898	159587	183793	171065	135481	96066	154109
AKR1B1	17008.5		18909.7	18789.3	22637.8	22692	25455	19503.2	27285.8	20050.3	20670.7	30596.7	30888.4	37023.9	27893.6	32208	30921.8	30243.8		19782.1	18118.2	19285	21861.8	25394.1	30872.8				18289.9	19737	24194.4	21655.4	30276.8	33004.7	30592.4	24366.4	16949.8	29973
ALOX5	33598.8	32891	35660.1	35366	40699.1	41267.7	48053.1	36495.4	50882	37577.6	45372.9	59806.4	68159.1	76789.8	49362.6	65445.1	58047.6	58795.2	61339.5	30978.6	34887.3	39272.1	38892.3	51342.8	40331	58493	37030.8	56249.3	37397.6	36548.7	48144.7	47209.5	57513.8	66690.3	59536.9	46982.2	36814.8	53307.3
ALPI	6883.3							6994.26		4954.35						8155.9	5408.45								6553.66			4439.52					5065.16
AMBP	15607.3	16783.1	17127.4	35206.7	19648.8	36098.6	30550	16327.2	38559.2	24077.7	15723.8	37232.8	50072.9	30760.5	42993.1	38450.7	26487.6	58042.2	44505.9	19843.4	16182.2	32260.3	20173.4	22111.6	29754.7	48311	30087.5	24159	22355.5	15368.1	19381.5	19492	23513.6	27963.7	31852.9	18609	17259.4	26826.8
AMPD3	9402.57		11170.6	13206.5	12842.2		12784.5			12219.8	15116.7	15821.5	17776.4	13753.5	13751.3	13718.6	14281.4	16077.3	13614.1	13212.5		12201.9	14232.1	14166.5	14371.1	14090	16983.9	15585	8865.48	11079.3	14651	12095.9	16026.2	14397.5	17469.1			14575.7
ANG	16793.5			16311.5	18798.7										21835.6					18421.4		16813.9					16024.1	25671.5		16954		17234.2		26997.3	25410.8	21777.7
AP2M1	5248.56		4373.83			4398.5			8062.54				10148.9	14351.2	8734.54	9870.97	10042.1	9210.23	6310.19	5966.18					10446.7			8989.74	7742.56		7773.53			10992.2	9326.4	9749.44		10936.7
APOA1	35506	55764.8		36148.7	42088		54908	35888.5	52736.9	38540	40846	86725.7	33438	99768.5	56833	87435.2	85023.3	71513	68078.8	44509		51481.5	52018.6	68236	64612.2	92388.5	52684.2	65728		38311.3	80261.3	68553.4	0	82429.5	68823	63276.9	38949.4	66846
APOA2	35855.6	304444	552750	321905	152293	684308	95668.4	92564.1	377272	212541	398263	176411	419277	302560	42544.9	47972	195943	43817.2	48463.1	44330.4	310535	305469	43792	364125	41738.6	139450	35403.8	305828	256958	289606	49161.9	166653	44465.9	717023	53608.6	50115.1	615654	50624.2
APOA4	10679.3	11546.8	10975.4	10913.2	12995.4	12756.2	14300.2	10277.2	13737.5	10199.8	13169.9	17556.3	16426.7	21321.7	14123	19287.4	18026.7	16403.7	20760.1	11624.8	9475.61	10366.6	14150	15293.4	15523.9	17341.1	12484.4	15424	9759.34	12063.1	13718.5	12452.6	17570.8	18877.6	16572.5	15935.3	12608.5	15808.2
APOB	11438.8	12288.9	11986.5	12064	13279.1	14071.8	15467.8	12385.4	17380.9	12321.5	12350.7	21439.1	23713.3	20063.1	18029.9	21593.8	21603.5	21286.5	20549.4	14300.6	11241.2	11907.7	14782.9	21285	15452.1	23049	12270.6	22018.7	13457.4	12453.4	17081.8	13818.2	23732.3	26473.3	21200.5	17454.2	12474	20994.8
APOC2	20662.1	17412	22023.5		21170.8	24602.3	23570.2	19542.8	21384.1	20061.9	25480.4	33777.4	30312	45580.4		28937	27932.3	30457.3	30809.9	25896.6	23644	25538.3	25436.2	22810.7	31013.9	33218.7	19198.6	29834.2	9752.5		26730.6	26602	28877.6	37295.1	29110.6	28663.1		28991
APOD	21597.2	21964.6	22071.4	19550.1	23498.3	23524.2	32010.5	22155.3	28615.8	23461.8	24676.7	35180.8	34441.5	35153.4	32473.1	33271.1	33587.8	31165.9	34085.6	20662.5	17725.5	23103.3	27150.6	30633.4	37750.6	31476.8	20987.9	30051.8	22353.4	24811.9	24395.2	24261.7	31097.2	34714.6	25624.7	26997.5	21788.3	26503.6
APOE	6866.68	7170.97	7439.37	6448.2	6962.95		9293.44	6957.64			7415.28	10962.2			9094.78		11061.9		11435.8	7811.01	6028.53	6623.29			10079.6		6980.78	10997.8	6592.68					11808.8	10526.8			9479.28
APOH	1983.7	2062.17	2323.54	1820.43	1952.26	2463.12	2273.39	2009.65	3236.71	3590.12	1978.12	2953.36	3381.83	2857.83	2339.1	3136.59		3507.49	3302.49	2306.64	2589.14	2271.17	2617.16	2248.71	2893.68	3372.46	2166.17	2883.05	3031.68	2713.38	2538.6	2908.89		2851.22	2682.52	3267.89	2449.09	2722.35
APOL1	18062.8			27300.9		34729.3		30139.7		23533.5	52174.3	23338.2	23125.4	20633					19459.2			23282.6	23013.1	22139.1	42600.1	28410.4		28603.8	29662.3				34513.6	20707.5	41244.9			27030.8
APOM	7980.91	12355.2	7857.94	7674.89	5149.15	9252.56	14523.2	13204	13027.3	6433.65	9753.7	9499.54	9275.44	8721.16	10634.8	11698.7	10646.6	12039.9	12241.4	10293.9	11562.5	8685.71	7459.42		13239.9	10236.3	14569.8	8740.12	8411.01	12894.4	8923.94	5927.62	19778.8	11537.3	13010.2	11234.1	7427.51	16320.8
APP	8447.07											100955
APRT	15262.1	23908.7	10770	19015.9	17869.5	19944	23817.4	15893.1	25121.5	19288.7	16207.1	18165	26470.3	33312.4	31608.5	17641.4	21108.5	30252.7	29168.5	24971.4	16623.9	19295.3	17550.3	17707.8	23906	32496.1	15266.6	33151	19550.1	16508.5	25145.8	24620.7	25690.1	34403.1	24936.4	22565.8	14947.6	22466.3
AZGP1	4124.87	4170.54	4066.81	4394.82	4201.54	5002.38	5015.89	4281.42	5771.21	4332.62	5151.37	7131.66	7561.89	7552.29	6117.39	6581.2	7429	5644.79	5560.75	4633.56	4181.28	4250.6	5310.72	5974.62	6183.37	6555.24	4289.44	6588.03	3897.1	4517.42	5366.53	5007	6491.11	7768.37	6496.54	5090.71	3608.47	6167.17
BCHE	7334.15	11043.4	6739.22	8955.83	9380.24	7920.21	10544.5	13576.8	8373.52	11173.2	13775.3	11603.9	10814.9	11933.1	9258.31	15462.3	9298.64	9666.55	10342.9	11354.4	5976.33	10675.4	7497.31	13390.7	18181.1	10969.4	5650.33	10793.8		6251.53	17636.4	11600	9411.67	10372.9	9834.96	11970.7	6742.42	16632.7
BCL3	116895
BPGM	5913.41		5546.48
BTD	5798.55		6138.48		7521.66	7535.23	5939.01	5889.49	7598.62	8237.04	6001.75	9103.2	3915.87	7738.1	5411.84	3879.53	3877.06	7382.2		7742.39	4920.17			6185.88	6645.79	4147.09					6474.48		7702.38	6386.17	3582.34	8639.36	6980.3	7867.33
BUB1B	16053.7	17888.7	16497.2	18744	21144.5	18375.9	25448.5	17816.8	27370.8	16680.4	21027.3	31751	29215.6	25812.2	27737.8	38689.3	25950.9	26070.7	28100.5	18498.7	16835.9	19481.6	21734	25929.2	27572.6	21609.4	19572.7	24157.4	17032.9	12261.6	24557	22786.8	24943.9	29691.3	28607.3	21963	18406.9	29726.6
C11orf54	8883.91
C1QB	4958.49	5991.35	5580.79	5062.07	5890.29	5537.23	6062.95	5870.65	6661.98	4973.43	5811.22	7865.41	8648.07	7396.51	6519.68	7401.11	6773.24	7955.62	8398.02	6196.59	5965.33	5844.26	6279.38	7334.75	8447.03	7814.58	6743.68	7572.51	6276.75	5951.15	5843.32	6409.07	6964.2	7372.15	6906.7	7934.62	5761.58	7494.49
C1QC	22335.7	22301.2		25831		31108.6	33799.9			26931.3								39685.9	40387.1	29791.3	22535.6						27763.6					28506.6	39845.9			19125.2
C1S	9251.56	9465.32	10322.5	6338.8	10802	5669.25	13606	6543.49	11688.4	10135.7	7869.72	26226.5	14082.5	29661.4	19396.5	13015.8	7482.81	12731	10317	8827.08	6098.89	2907.82	9479.13	22297.7	20545.6	17499.3	8919.99	27111.8	8980.95	17983.1	7433.29	8887.79	3903.16	27589.5	10822.7	12535.2	5819.51	12447.1
C4B	6644.55	7618.47	6709.59	6625.1	7548.32	7710.23	9112.57	6500.7	9509.95	8014.24	7755.33	11048.7	13118.4	13340.2	10250.9	13611.2	12457.7	10852.1	12140.4	8171.43	6763.11	6649.87	7822.03	9714.77	11074.6	12336.2	6868.4	10630.1	7791.72	7377.56	9055.61	8791.77	10766	12646.1	10733.8	8930.29	7020.78	10927.9
C4BPA	31745.3	32519.5	35453.7	35901.8	40321.4	39771.5	47561.7	31296.8	47661.8	35979.4	39392.1	63147.5	60883.3	66584.6	48561	63684.9	57579.6	58107.5	57965.9	41562	32650.4	36520.3	40383.9	49179.1	55579.1	54444.9	34725.3	54557.4	32778.3	35431.4	46176	38599	55979.7	64067.4	54321.8	47826.7	34560.7	52930.8
C4BPB	9038.51	9921.03	7869.47	8521.65	7656.36	8126.81	12321.7	9503.69	11860.2	9179.17	8930.13	12499.1	11591.2	12742.2	8367.46	13097.6	12407.9	12721.1	9357.64	10856.7	6392.87	8290.81	10456.8	11425.7	13230.5	11166.3	9473.02	10407.8	8282.44	7593.36	8421.97	7551.93	12011	12925.6	11674.8	11642.9	8880.7	11723.2
C6	10398.8		6372.83	14249.4	13884.1	8609.15	15007.1	12591.7	15166.7		17823.3	9381.45		10952.5	8835.98	15643		10337.7		7683.08	13767.5	10165.6	18138.2	8850.59	14188	17569.7	13475.8			11108.6		6594.22	9533.92	16124.2	21121.3	15012.7		10109.6
C7	6996.63	7267.74	8235.77	9025.09	11955.1	11495.5	13885.3	7638.94	13070.2	9639.02	10263.1	19329.1	16805.1	18033	12804.2	17951.9	16563.9	18396.2	13150.9	10739.9	7833.34	8142.19	9784.7	14781.4	15198	14797.4	8072.61	15170.6	9524.8	8866.59	11233.1	9959.23	15028.3	18531.8	15313	14645.6	8797.05	12369.5
C8B	15546.7	8245.69		20776.5		9997.8		19538.1													20575.7	21246.1	21792.2				16880.4		22750.3					11634.9	24767	8034.84	15372.5
C8G	8315.2	6718.28	5749.1	6540.69	6277.65	7544.56	6244.95	9075.35	6864.76	8001.38	6170.62	10864.4	9831.32	8784.27	8167.84	7930.74	7190.36	8149.06	10271	6939.03	7302.33	8821.67	10594.1	7532.38	8823.28	11632.1	5322.62	9811.65	5729.78	6149.01	8196.15	5899.29	8909.81	8108.14	7686.32	6793.2	8009.16	7998.76
C9	1768.88	2504.28			4221.26			3992.39		11302.3	2553.84	5266.29	2840.98			4945.28		4219.05	15851.9		3002.33	3120.8	3616.71	3460.77	6554.48	6500.86	3484.36	5003.95	2895.53	2086.48			2713.5	3440.99	4042.58	3544.36	2298.28
CALB1	12120.4		14833			10795.8			17534.9	16350.3				13526.8							0								14958.3								16108.4
CAPRIN1	51852	69677.3		71505.7	93442.8	86051	91591.7	59603.9	94123.1	70563.3	89776.9	120575	137200	151739	114988	145815	61995.3	113415	114048	83128.6	69515.4	68307.2	94774.6	116441	111037	128383	78260.9	122023	0	74456.5	91000.1	61647.7	106107	125086	124871	100339	72462.4	61767.6
CARD9	6835.07				7152.95		7577.95		8068.01	6985.29	8127.9	7818.48										6526.17		9343.55		9631.53				5566.97				9475.86	9352.92			7516.23
CASC4	10659.6	9810.69	10889.9	10288	12273.7	11179.3	14894.1	9737.08	12836.8	9177.4	8712.8	12708.1	15500.5		9866.35	15297.1	18601.4	15484.8	13276.3	12269.8	7777.15	8252.41	11686.2	15010.7	11356.1	18241.7	13413.1	13796	10644	7905.48	14766.5	11070.8	10195.4				11976.9	13333.7
CD163	7478.5			5450.01	5222.8			6298.53					7744.9					13437.3			6614.97					14224.8	5908.22	8836.69	8781.63			5115.38		10438.8	9257.86			6879.21
CD44	5851.78				5199.21	5532.86			6935.93	5286.93	0		7934.43		0	8549.94		0	0			4798.91	0		8306.79		5629.38							0	0	7246.32
CD5L	12396.8	14175.1	13334	14128.4	11426.4	14071.6	17664.7	11361.6	16385.1	13936.9	16219.1	20280.8	21083.4	20676.4	16878.4	21045.2	18879.6	18853.9	19510.4	15668.9	13440.6	13487.9	13913.3	18800.5	18461.4	18801	13215.4	18111.7	12366.2	13807.8	17013.7	15505	17995.6	21345.3	18161.1	16595.4	12092.7	19743.9
CDC37	7294.65	11305.8	10686.3	9872.77	9726.73	9631.29		10436.4	10115.2	9558.2		12405.5	11720.2	14592	13048.1	11702.3	13290.7	13238.3	13747.7	11210.1	8598.02	9205.31	9956.08	10165.5	14829.1	12631	8491.52	12247.4	10359.6	9223.86	12703.5		12877	13032.7	13358.1	12533.5	9520.58	12431.9
CDC5L	34544.5	32598.7	35077.6	35265.5	37045.4	37506.3	44830.2	31569.9	46478.1	35221.6	36350.1	59629.7	57950.6	66153.6	44565.4	57463.7	57783.3	57438.7	58213.9	39213.2	31957.9	34883.1	38712.3	48636.2	56131.2	56849.3	35632.1	52173.1	38899.9	35760.9	48120.9	42156.2	50777.1	58358.8	54825	49137.3	34248.4	52257.6
CEP250	17224.4	23803.4	20612.6	19120.2	18791.1	17709.1	25639.3	20071.7	22183	16838.7	20156.2	24048.7	17355.5	27169.9	14288.2	25474.1	21109.9	24426.8	19537.2	19191.5	17338.7	16473.7	23213.1	23416.2	17797.8	15142	12524.4	24119.5	22563.3	20621.8	22183.2	25554.1	23766.2	27664.9	14947.4	13880.9	22187.4	15099.1
CFB	13841.8	16229.8	21037.3	15232.4	16411	20536	19362.6	15689.8	22644.9	11179.9	19756	26364	27483	20213.9	16457.4	23652.2	22163.5	24659.8	23062.7	16316.9	12135.7	16166.7	17697.3	18133.9	22002.9	24081	13956.1	18616.5	15896.9	17157	20342	14643	21700.3	19839.1	24071	21747.8	17655.4	20361.6
CFH	4969.05	5880.74	6402.24	5813.15	6287.69	6444.76	7165	5729.33	4309.75	5962.42	6706.82	3309.1	8471.3	8492.5	6300.02	7154.52	8369.15	4511.2	7029.99	7615.01	6112.88	5745.49	6516.93	7497.59	8130.53	8366.74	6016.92	7544.08	6489.63	5043.38	6554.33	6428.06	7037.53	7319.5	7687.18	6948.51	4821.77	7189.19
CFHR3	2901.05	3612.94	3094.67	3427.23	3880	3311.41	4610.01	2896.95	3939.66	3338.01	4015.92	4332.38	3303.58	3488.85	4227.39	3653.08	5542.54	3576.43	5048.64		3280.25	2884.41		3672.96	6803.87	5684.07	3537.71	4256.21	3235.97	3453.03	4323.01	3177.76	4215.79	4146.98	3203.68	4151.05	3122.9	3538.8
CFI	4554.57	1858.32	2515.22	3217.03	6063.45	4526.9	9988.91	4341.05	6492.77	4179.17	5009.73	9847.2	9137.89	8043.03	7724.45	10612.8	6403.32	9434.19	8144.73	8432.49		7558.38	4797.38	7614.65	9407.15	9033.69	7123.83	9694.94	2951.3	3277.53	5339.61	5166.45	6178.41	10501.4	7374.39	5173.65	4269.78	6891.07
CILP2	10693.3		8982.16	13678.2		10740.5			14200.2		15287		18642.5		12439.7		16320.4	17889		14430.8		12387.5	15265		17084.3		0	10172.3		7006.01	13730.1	14117.5		18644.2
CLEC3B	2236.28	3929.63	1706.61	2381.8	2267.22	3564.24	6844.05	2286.92	3748.27	2674.75	2599.7	4253.7	5894.67	3216.8	3830.79	6100.08	5170.38	5980.85	3608.33	2210.84	2310.65	4246.1	6192.32	4178.27	3283.67	3726.14	1961.25	3299.07	3412.3	2861.89	5152.73	4367.49	5351.2	5707.27	5245.05	3505.62	2760.58	4540.62
CLPTM1	10802.3				14529.4		16867.3	11802.9		12847.3	14669	18786.2	19453.5	20628.7	15276.4	19604.1	17784			13561.7		12686.5	14531.2			18395.2		19120.1	11633.1	12319		9474.5		19697.7	20091.4	15597.9	12202.6
CLU	22105.2	16917.3	23793.8	24602.4	18597.2	25216.3	33112.3	34759.1	33064.2	24316.2	29322.6	29077.9	46374.5	60644.2	23311.1	28126	31980.1	41958.4	26894.2	27936.8	22472.2	24370.5	28100.3	35689.9	53837.9	30298.4	25001.2	27712.1	23937.4	24804.8	43477	34147.9	24030.3	46866.9	38882.5	34092.2	37904.5	27365.7
COL5A2	9468.81	10453.9				10080.2	5612.74			7702.28	9012.65		13346.3		9736.81	13466.3	12305.7	10857.4	11557.2	9906.16	9960	8655.14			10909.5	12171.5	9634.22	12147.4	10149.5	11018.7		10360.3	13094.9	4757.08	12123.3			4393.87
CP	12455.5	7699.4	11529.2	8564.41	8688.79	15478	13263.1	10850.7	10093.7	9400.96	15228.6	19136.8	10056.4	15445	14621	17366.5	15011.6	19324.1	8893.62	13728.6	7172.53	9222.03	9727.49	10944.8	11453.9	17382.3	11822.1	14822.7	8527.05	7490.12	8785.56	7035.88	14061.2	17859.9	13195.7	11693.8	7836.83	8490.65
CPA4	18919.9	13772.2	12617.3	17615.4	22532.7	12387.9	25478.8	11967.6	27304.6	20657.6	19117.8	36601.7	26431.1	31259.7	31084.7	22467.4	22485.7	28699.3	34948.7	22924.7	14246.8	22729.2	18938	27414.7	25685.4	36729	18617.9	17559.1	12948.2	11068.3	20181.6	13865.2	39964.9	33417.7	21669	18755	16167.4	21109.1
CPN1	7637.56	5138.73	8815.41	8021.39	7233.64	7515.06	7085.15	5196.91	6565.94	7852.26	8087.6	7670.97	9601.27	7482.51	7037.11	8359.33	6724.36	7376.27	9007.55	9687.55	6777.09	5956.56	6235.41		5802.2	11488.6	7305.44	8245.82	6667.76	5085.33	10563.3	6426.76	7125.72	7752.04	8049.22	8211.24	9789.32	5886.88
CSN1S1	4614.95																			5125.82
CSN1S2	11416.3		8004.01	13092.2	12879.1	15882.6	14486.7			13664.2	13675.6	17863.6	14271.1		15280.6	13997.9		15659.8		13787.1	13641.4	4507.13	4553.69	15576	18089.9	10304.6	12290.5	10396.8	12379.6	9643.39		12011.4	16846.5	17100.6	14235.4	16748	13593.7	13554.2
CST3	4893.36	4585.07	4151.01	2764.42	4636.45		5226.45	4628.3	4352.39	4290.17	4581.15	3784.91		5246.27	4544.9	4921.59	2937.7	4908.64	4504.09	3717.13	3444.27	3413.12	4372.08	4364.5	4852.33		3326.33	5154.45	4902.47	4935.03	4333.8	4120.89	3881.97	5094.75	3990.86	4288.3	4553.7
CTTN	14343.3															19343.2
CXADR	6372.83			6351.24										23411.3		10710.5	10908.5			8122.9	12248.9		7776.65	14269.8		11464.2								12146.3		10263.1		10424.9
DBH	3457.58
DIPK1C	14529.7	16105.8	14124.1	10464.2	12288.7	17096.4	13190.3	15507.9	20406	13186.8	11167.4	15925.9	16288.1	16890.2		15996.1	15521.9	15467.5	14422		10265.5	11652.1	16961.1	19395.7	13907.1	14815.1	10326.3	13861.3	15246.8		19999.9	11475.9	15157.5	23565.6	24092.3	19447.8	13654.9	15897.3
EEF1D	30568.9		523.592								526.459	52453.3		30405.8	1364.45	30576.8		27488.5	45463.8	26198.4		331.314	18132.2					50217.8				505.184	955.146	683.343		363.119
ELOC	18125.5		19697.3	20124.3		21376.6			27284.5	19920.1		31264.5		32241.6		33054.6	28007.3				19238.8				29699.1			15358.7	19381.4	18686.1		21233.6		32612.7	30044.2		18933.6	28558.3
EPB41	56833.1																													60556.3			116269
EPS8L2	18845.7	61173.3	63140.1	51376.9	75900	47855.7	68694.4	42468.8	74604.1	31194.2	74403.3	77977	113559	118188	47247	32658.4	107671	32488.8	105438	74489.3	29619.4	66670.4	22853.2	28096.8	101387	110071	33490.1	100426	34502.7	49997.1	86430.9	23202.4	30810.5	31298.1	30116.1	28429.4	43094.3	104364
F10	5453.2				7418.86										10820.1									9336.78								8587.48		12671.6				11199.5
F2	18240.9	16823	16269.5	16441.8	17612.2	15351.2	24785.9	18442.5	22393.9	17856.4	18706.4	25466.4	24968.4	25501.4	26329	24564	22748.6	23191.2	25386.1	16042.4	14409.9	15276.1	17552.5	21109.5	21645.5	23160	18218	25094.1	15393.8	15286	21799.1	16720.9	21764.2	24391.2	25468.9	23552.9	16223.7	23297
F9	3464.05	2864.24	2966.04	4387.26	4503.91	3183.6	3003.82	2936.16	5315.56	3928.28	5004.82	4904.94	6459.09	5661.33	4332.88	3767.39	4195.1	4088.59	4807	4244.85	2883.83	3926.18	4242.2	3510.11	6284.99	4059.22	4132.16	5648.69	2578.15	2400.31	4789.28	4198.01	4036.04	5474.02	5699.43	5504.69	2838.99	7050.57
FAM172A	8044.8																		10140.2
FAM192A	29825.1	28773.6			34463.3			30448.1			29417.8				18820.5					35871.2									28691.9	31004	36716.8	32274.4	43949			38820.8	28740.5
FAM32A	7328.92							10161.5											12570.2
FBL	4739.39						5422.69									6617.17									6811.89													5666.02
FBLN1	4995.46	3825.16	5443.75	4874.48	6662.51	5289.64	6876.36	6462.22	8560.5	8246.76	6550	9499.13	8842.18	9832.94	8114.81	9663.3	9053.31	8605.53	8923.75	6317.76	5752.55	7325.13	6978.19	10548.7	7635.85	9101.02	6793.2	8206.17	6122.55	7308.4	7527.06	6953.58	8179.25	8990.44	8087.43	10512	4271.45	8667.97
FETUB	4282.59	4577.67	4340.51	4478.72	5199.95	5015.86	7103.4	4377.92	6805.25	4288.21	5604.41	7590.48	8041.23	9806.57	5926.14	8240.29	7784.29	6982.24	6272.78	6514.48	5099.34	4944.2	5700.3	6485.03	6758.39	7394.63	5568.9	7611.31	5211.98	4942.83	6473.24	7359.11	6272.27	7911.4	6720.51	6259.27	4794.36	7258.82
FGF1	11147.3			8178.9	9037.33	10820.4	8843.63	10823.4						9848.14		10795.9		9987.23		11508	10271.6						10041		10182.4		10433	10995.5						10846
FGFR1	16043.9				22718.7										27483			29674.5													24539.6		29014.4
FN1	0			10317.4	13068.3	13539.2	16474.1	11792.7	17150.1	11152.8		17613.7	21866.6	42261.6	14022.6	39829.5	19155	15480.2	16260	12695.8	12321.9	11242.8		15582.9		16808.5	11056.5	16052.2			16325		14166.8	21963.9	13497	17802.3		18515.1
FOLH1	9055.4							8797.16														10010															9403.31
GALE	8901.7
GC	30515.3	22814.9	22900.8	23265.5	38643.2	37383	46814	23278	48537.7	33727.5	37393.5	64186.6	40909.8	57373.7	30434.2	54076	41299.8	57663.5	57511.2	28894.1	31253.9	24948.4	27181	31881.7	38743.1	59542	20173.4	36892.3	31169.6	32100	44970.9	26793.8	54799.5	58856.2	58419.4	47005.8	22311.6	55907.4
GFPT1	16256.7	16575	19653.3	17275.3	17717.2	20503.2		18821.2	19145.7	14167.6			30452.1		18449.1	19559.7	23691.6	16060.3	21310	16042.9	18060.9	13282.4	17468.8	20887.9		17868.9	14451.7	24118	21502.5	21173.8		20755.8	22051.7	26238.4	29212.1	16160.5	18360.6	20440.8
GMPR2	68385.1
GPLD1	6824.66	7662.54	6539.72	6832.41	7334.98	6167.65	9137.05	5680.31	6105.24	8088.1	6819.54	8466.64	9760.12	8672.25	7257.01	7986.82	8348.64	6673.63	8208.99	8331.08	6306.22	3876	7077.35	9511.99	8957.32		7879.33	9187.92	6263.8	6715.85	8761.16		7896.01	5258.06	9071.92	9002.4	6245.94	5150.52
GRIA2	19663				26371				38743.9	22255.8	25196.6		42973.3	38231.9		36207.5	33003.6	31431.8	40983.1	33648.6			17005.1		35549.3	31508.1		35315		22355.6		25345.4		46575.3				31118.3
GRN	3589.7	4422.12		4533.41				7055.58	3769.22	4814.98	5277.42	5882.93		4832.07			5760.73		5981.91	3543.1	5748.03			5922.16	5660.17			6290.91	6412.8	4090.72			6025.54					5030.31
GYPA	13450.9	12646.3	12686.4	12320.8	16248.5	14427.1		10274	14170.4	14159.4	14583.1	13699.6		11848.3	13549.9	18662		14184.7	10798.1	14358	13673	13569.2	16596.9	11296.7	12503.1	13161.5	15408.4	13559.8	8635.03	11531.5	15322.3	15846.2	16357.8				10545.6	20719.3
HBA1	2401.01	2147.14	2939.54	2603.07	2166.37	1731.24	2547.13	2340.97	2421.49	2912.45	2606.18	2671.21	2860.98	2277.01	2418.72	2983.85	2272	2775.14	3025.88	2092.83	1824.21	2152.72	2386.53	2235.58	2914.49	2719.28	2041.15	2632.3	2620.24	1912.43	3050.91	2270.1	3862.15	2766.62	2830.35	2739.72	2843.9	2589.34
HBB	8670.01	8742.38	8925.95	9116.9	8805.24	9875.45	11156.1	7781.4	10548.5	8693.77	9372.07	12368.3	13126.9	13193.8	10793	12721.1	11600	11621.9	12153.2	8977.8	8924.72	9625.37	10242.8	11608.5	12898.2	11989.5	8415.04	11715	9551.5	9388.38	10400.6	9397.77	11657.5	12184.8	12193.9	10934.1	9002.94	11483.2
HBG1	15274.4	20913.1	16111	14570	19532.1	12235.2	24297.5	15506	24998.4	14152.8	16771.7	22701.3	32038.7	26177.3	21831.8	29205.7	21936	24161.5	24972.6	17898.3	14212.7	12915.3	26278.7	23277	26610.6	31105	14395.6	27959	16284	14997.1	19819.6	14082.4	27568.9	30249	29572.8	20531.9	14084.5	24124.1
HDGF	6007.85	39774.8	39464.1	28199.3	35867.5	37710.8		37511.9	16260.2	35071.9	11063.3	55300.2	58440.3	60448.7	50674.3	57217.5	56331	56821.6	60113.3		36272.4	38441.5	43080.9	49554.3	58127.5	16590.4	38628.7	55205.9	40857.3	37590.5	44928.2	39860.6		55822.9		47732	40545.5	50887.1
HOOK3	17833.7					24859.8		18696.4		22399.4			33095.9		31270.9	32978.8	35680.3		29738.8	26402.5								28677	18683.4				32668.5	33874.3		30640.5		35139.5
HPR	10963.6	11419.6	11311.8	10995.1	11717.7	10541.7	14414.9	11301.7	16003.6	12125.2	12847.8	15694.4	14374.9	14579.9	13780.9	17781.4	16863.6	15769.4	10941.5	12221.3	10571.6	12309.4	11707.2	13832.9	16927.5	18476.9	9149.8	14509.5	11926	10963.7	11381.7	12684.2	14079.5	16402.8	15690.8	13162.8	11709.2	14893.4
HRG	13362.2	12263.7	14342.3	14077.1	18213.2	16805.3	23212.7	12066.9	22118.7	14851.5	17089.6	29067.8	30435.3	34121.3	22139	30828.4	27225.6	27256.2	29366.2	17501.5	13275.6	13949.8	16819.1	22313.3	25015.7	27978.8	14860.8	28102.5	13063.6	13520.7	19720.2	17523.3	26465.4	32692.5	26823.3	20650.9	13476.6	24619.5
HSPA5	8342.53	7974.23	5884.06	8571.1	9007.57	8587.97	10263.8	6619.04	8214.22	4948.47	8996.17	10569.6	11709	13380.1	10732	7678.41	10278.6	9840.47	11755	9715.56	6829.49	5975.01	7124.54	9883.32	9888.05	11159.7	8543.58	8224.57	7105.17	6774.99	9991.73	7928.6	10107.7	12223	6363.11	9910.5	8943.41	7805.85
HSPD1	8763.32	9279.38	8704.96		11166.3	11286.2	11510.9		10141.6	8560.36		13536.2		11256	10437.9	13537.3	13077.2	13842.6		11476.9	9468.79		9647.88	10929.1	13657.3	11573.3	10207.8		9964.28		10338.3	9629.29	11025.3	13625.8		12140	8777.82	11783.3
IDH1	10201.7						15678								14052.6								14156	14286.7								10264.5	17233.3
IFNAR1	9826.32	10302.3	9261.07	7915.65	9850.24		11279.4		12263.6				9776.84		11541.9			9711.77	13433.1	11716.3	10864.9	9520.11										9169.03		9398.87	13774.7
IGF2BP1	27239	30201.1	26913	29364.9	25422	35065.6	36875.5	17404.4	27164.5	22129.4	24249.5	36392.1	51680.7	66142	38557.6	52088.7	51299.9	34393.1	33617.2	25005.9	24063.9	19741.5	33091.1	47392.9	34014.1	48549.4	20038.4	36505	18934.7	28473.9	46873.7	23467	42418.8	64475	33657.2	36554.3	18536.6	33854.3
IGFBP3	8615.62	11258.1	9589.16	9519.63	8760.86	10468.8	13557.6	8390.64	9683.25	7983.12	11256.2	11181.2		13178.7	12137.6	13982.1	11147	13141.2	12493.9		10135.8	10627.1	12264	9257.05	14892.6		10521.9	12164.6		10253.1		9641.1	12888.7			8554.13	11145.1	13821.7
IGHA1	47111.2	49253.7	52573	51272.1	56079.6	53565.7	64105.3	46507.3	65949.4	50825.6	58051	81867.1	86633.7	94668	69707.8	92287.5	80386.6	84284.7	83336.3	56716.9	51655.5	54702.2	57460.9	67527.4	74525.4	85476.1	52797.9	78925.3	51825.6	53327.9	61738.4	54236.3	77264.8	88704.3	80393.9	64202.8	51684.4	76448.7
IGHA2	2707.18	2995.7	2487.23	3341.28	3278.35	3535.42	3814.28	2338.44	3721.81	2441.57	3055.45	4281.17	3708.56	4235.98	3934.7	5163.25	4179.34	5246.8	4376.85	3814.23	3115.76	3084.95	3313.6	4436.69	4717.34	2846.88	2845.96	4316.12	3121.05	2942.69	2803.3	3172.36	3954.36	3732.2	4658.61	3371.95	2692.1	4320.57
IGHG3	13663.3	18859.3				21649.9		14711	26833.4	22280.1	20593.2		24697.5			25001.5			26139.1		18167.2	20931.4	19864.6		29284.3				25744.8	19253.5				28776.3		21842
IGHM	23136.7	26594.5	28471.7	28696.9	33480.1	30867.9	40943.3	24686.2	44497.7	28212.1	34590.8	53832.1	54976.1	63645.7	42943.2	52490	48174	48348.6	52771.1	36352.2	26404	27419.6	31215.4	44436.2	46988.2	48464.9	30239	52137.3	27134.8	27890.9	40604.7	33530.1	49365.1	57543.8	50367.5	42619.5	24976.8	47521.6
IGHV1-2	7804.92	10082.2	8435.35	9394.99	9847.68	13430.6		8540.33	10906.6	7501.32	10791.6	8605.03	9720.79	9473.19	10357.4	7565.67	10538	9509.63	13101.6	8162.23	7857.54	7941.69	10475.6	13516.1		13955.3	11084.8	8944.63		8607.24	11541.5	8150.53	9729.3	9670.01	12875.8	16588.9	11527	11713.3
IGHV2-5	4538.24		6326.61	4356.36	5608.76	5142.17	6975.63	4450.34	6092.86	4667.9	6710.74	7153.1	8109.54	8333.34	6861.12	7792.01	8284.74	6579.33	7408.16	5281.55	2487.26	4634.55	5194.45	6370.84	7124.34	8099.42	7774.58	7462.33	5452.35	4307.2	6032.1	6744.05	6832.62	7953.99	7046.79	6378.71	5100.6	6850.25
IGHV3-11	37815.3	37361.9	48230.8	44534.2	55756	50519.5	55936.8	45711.7	71177.7	38314.5	48932.2	84841	72795.4	77449.2	54857.3	77338.2	64300	73953.3	63547	48944.1	26908	39524.7	42424.3	68221	60690.7	72088.3	37024.5	62137.3	40864.2	39847.7	65514.3	34047.4	73011.7	77878.1	64088.9	57463	39224.7	58241.7
IGHV3-23	21708.2	24175.8	31606.3	25472.5	33109	23139.1	23146	21675.4	33679.7	23837.2	25532.4	33925	36806.9	41820.2	33889.3	38765	35513.3	42279.5	37603	26290.1	18047.9	26940.3	22993.9	30958.3	30568.4	33753.5	24197.4	40815	23006.2	24957.3	27612.1	25812.8	37877	41279	35597.9	30738.7	24886.9	35369.9
IGHV3-35	10092.9	9901.16	10513.3	9562.03	11648.8	10863.3	12194.3	12423	14767.4	8587.63	10910.2	14109.6	14236.3	15032	10774.2	13642.5	14333.5	13271.7	12172.3	9856.13	9756.79	10848.5	11465.3	11919.9	12934.8	13495.9	9860.8	12396.4	10412.1	9754.62	12552.6	10677.6	12677.9	13955.8	11761	12898.3	10052.2	13095.9
IGHV3-38	6752.09	7361.86	6253.52	7320.03	9945.63	8444.67	9680.29	5341.42	8141.83	8683.14	10311.4	13177.9	21544.6	16982	10671.9	9110.31	6832.95	9541	10932.2	9093.52	4282.19	11010.5	9949.08	12186.8	11169.8	15408.9	10931.6	9400.78	6813.32	8686.46	19069.1	8442.04	11217.6	12049.6	11683.1	8884.23	14664.2	9424.38
IGHV3-49	12432.9	12480	14878.7	13246	19604.7	18744.6	25904.4	13081.2	23096.9	16697.1	18174.8	29462.6	36759.9	40272.2	23640.5	33406.6	26146.8	29980.6	24902.9	18188.5	12294.9	16329.4	18317.3	23611.9	30225.3	31555.8	16317.3	24793.9	16291.4	12588.7	23502.4	18986.9	27660.6	33301.5	27852.5	23192.6	13971	27637.6
IGHV3-64	13183.3	14225.1	15981.3	16279.6	18112.5	20119.4	24879.8	15218.6	28180.4	16739.6	12135.5	37829.1		28895		36742.3	17111.3	31399	32805.3	19741.3	9222.21	13313.4	19008.6	30099.7	30504.4	30642.9	16456.5	26154.7	19651.7		18154.7		21901	27570.7	22923	19594.8	13239.4	23704.2
IGHV3-64D	16847.6	15613.8	9935.54	10084	19212.2	11629.6	18534.3	12450.8	18532.2	15670.7	14396.8	14071.7	20407.2	21766.3	11824	13863.2	14990.4	14545.5	22933.3	11882	13749.3	9361.54	13864.3	16923.9	13781.2	21670.1	13901.1	15045.1	16443.4	9492.45	17677.7	11437.5	17651.5	19354.7	13997.2	23114.9	9549.65	19562.4
IGHV4-30-4	49865.5	53940.8	67855.1	68874.9	50786.7	50485.9	75931	67248.1	54372.2	55252.3	61597.6	79418.1	90068.2	113673	87753.8	92290.9	101697	103177	100101	60286.5	44429.5	64057.9	53189.2	89237.9	93052.6	100187	66539.3	101069	55141.9	66474.6	83772.6	69430.5	100206	87357.6	81865.6	83784.7	68930.7	99072.2
IGHV5-10-1	7693.39	9942.62	10096.8	7297.98	8113.43	9242.93	11288.7	8278.19	8546.84	6326.86	8400.49	13081.1	10296.6	10439.6	9107.46	11298.4	9329.06	12932.1	12383.7	10917	6890.01	8676.83	10344.3	10356.9	8548.96	15277.8	9049.9	9670.19	8861.97	8676.89	8318.99	11683.5	13724.1	12591.3	14640.5	12538.6	8834.41	10850.4
IGKC	172830	89016.2	74774.3	143214	75451.4	152372	183940	124775	208296	192232	100505	126848	235844	179724	94992.6	115419	303360	227862	175094	260164	113840	133140	212280	98277.1	148630	157404	171492	140852	93120.5	133964	178530	37896.1	155648	121738	241542	118468	127362	195412
IGKV1-12	12922.9	17616.3	15953	13890	13288	15664.2	13459	13637.9		10525.5	20824	14131.4	25969.1	17669.9	15938.4	14486.1	16997.8	12082.7	20625.8	11039.4	12325.2	13801.1	14872.3	12365.7	13332.8	15493.9	14117		12900.8	13247.5	15532.6	12052.3	13897.1	14097	12311.3	23729	14431	14747.1
IGKV1-17	2069.51							2197.11					5933.63					4861.9										2411.44		5623.81	4579.27
IGKV1-27	21828.2		30588.9	10903.1	12566.8	16635.7	13281.7	27473.8	20300.2	19986.4	21930.3	27949.3	14821.9	35854.3	31029.8	20804.2	14281.8	38838	25667.3	29155.4	27825.8	14389.2	11310.6	16428.2	16213.3	17226.2	13357.4	40077.5	30308.6	16313.6	50630.9	26812.5	14538.3	24012.8	14639.8	25956	24446.4	14371.4
IGKV1-5	19882.1	24119.4	21961.4	24468.2	23222.3	25206.3	26926	20050.1	28564.3	19187.5	24720.7	33546.2	30933.3	29672.5	29959.4	31385	29767.4	34048.8	32950.8	25275.3	21454.9	22223.1	25549.6	28157	31001.6	32844	24485.8	31745.9	22616.7	28014.8	29650.9	21792.9	35602.2	30917.6	32496.6	28261.7	23810.2	30088.4
IGKV1D-8	7482.41		8184.54	9168.2	11214	9944.11	11482.7	7431.69	13680.5	8618.11	8876.05	15558.6	17203.6	18824.1	11668.4	17715.5	14077.5	14706	14068.4	10322.8		9455.42	11171.5	14964.6	12287	13196	7688.55	13178.5	9725.54		10586.2	9609.39	12578.2	17105.5	16093		8625.69	12983
IGKV2-28	29323.3	27436.1	33503	29394.8	29870.2	31290.1	35555.5	27663.6	36208.6	29346.7	29600.8	45932.1	45296.2	46170.5	35850.6	44024	42419.5	42598.1	44260.9	30510.7	29103.5	30948.4	30622.3	36969.9	42557.3	43455.5	29463	40850.3	30915	35645.1	35570.8	30624	41476.6	43094.7	41143.3	36676.2	30219.9	42360.7
IGKV2-29	6611.86	3362.13	1302.36	5073.49	4697.92	5768.24	5199.97	3159.29	6220.56	5909.42	1253.99	6030.11	5349.22	6552.1	1253.67	3540.57	4514.56	5348.62	3401.89	5869.38	1423.83	4775.39	5770.89	5508.62	3996.07	6913.76	4599.68	6307.93	1338.38	5400.22	6727.77	3630.41	6407.37	6090.32	4530.05	6051.98	3491.97	6398.11
IGKV2-30	5424.6	5857.87		6075.24		5419.49	6433.53	4592.74		6452.53	6436.73	8082.27	7431.13	7824.4		7711.67		7396.49	6638.66		5550.28	5609.49		8035.03	6640.48		6561.85	7347.12	5172.91	5826.43		7853.52	7919.26	7020.65	7016.68	6193.28	6039.71	6730.53
IGKV3-11	50878.7	49431.3	49571	70082	57710.6	54405.5	77075.5	46915.6	76989.8	50937.8	78546.1	119193	100113	129284	69702.4	132135	110610	85809.4	85018.9	58753.4	70132.5	48664.6	73131.8	73384.3	74188.6	52105.5	50946.5	77480.2	53147.6	52403.4	67331.8	80584.5	79742.5	85420.7	104717	97618.8	50897	84471.6
IGKV3-15	102746	110504	116607	116020	145970	126721	178625	66886.3	181990	110593	129956	204012	224664	223747	181227	223097	206253	167311	212071	136450	99622.4	109974	140456	185951	208622	208743	116445	183617	101207	110982	168545	142549	197383	207392	201652	166684	104249	200328
IGKV3-20	135146	136446	149914	148157	170556	160315	204252	132288	128978	149354	163254	270086	275512	306322	221320	271798	256263	269632	247352	170589	134939	153907	164534	228816	250384	259506	143571	238733	146335	143432	198331	169605	248720	277543	172996	207478	143275	247274
IGKV3D-20	29620.4	30081.1	15192.4	31800.2	32811.4	34017.7	42394.9	30679.1	43179.3	30909.7	34605.1	49684.4	52051.4	52868.3	41040.6	49739	48108.2	47838.2	47706.4	34292.7	30158	31794.6	36253.2	43466	47102.6	50458.6	31982.3	47132.6	33301.7	30112.3	37019.5	34019.7	44619.6	50122.2	45472.9	40874.2	32599.4	47154.5
IGKV3D-7	12851.5							17721.4																													18743.7
IGKV4-1	58534.1	66857.9	76083.2	69231.5	84721.1	93488.6	123670	66087.2	120658	75374.7	92012.6	147607	198162	187090	115538	205892	137812	154622	182702	85527.9	67745.4	72912.1	116085	136754	131947	134580	77997	148405	67611.4	86734.6	112352	83467.6	125189	156681	149624	106832	74031.6	151426
IGKV6D-21	4651.43	6071.02	1712.14	6060.76	6250.54	4792.11	5432.65	7331.85	8067	4766.3	3572.27	8938.29	6262.78	7620.33	3847.17	5891.59	6216.38	4863.28	7369.07	6761.43	6214.31	5891.25	5253.82	5942.12	5595.51	5861.41	5735.26	4707.39	4240.93	6132.42	5134.75	4792.91	4764.24	7726.09	6877.82	6311.74	6811.61	6197.39
IGLV1-44	14153.2	12533.7	8981.1	13701.4	14524.3	8309.53	16193.7	13262.5	16375.4	12703.8	9264.87	12093.9	18232.8	17135.3	10067.4	17538.9	16017.3	15788.2	16766.1	14798.4	13630.7	13968.7	13710.2	15789.2	14379.5	16249.1	13510.8	15635.9	14580.6	13449.4	14781	14386.6	16247.6	16600.3	15475.1	15678.1	15220.5	15700.5
IGLV1-47	11500	12056.5	12901.7	11083.5	13793.6	13416.6	16329.9	15487.8	16276.6	16373.8	13825.7	13869.9	24809	21360.5	17481	26862.9	13982	15258.3	15217.1	14150.4	11953.7	12809	14819	22328.2	18382.1	19484.5	10971.3	19090.6	12355.5	12575	20632.2	14143.4	18800.8	19463.5	18878.5	15803.2	12291.2	18533.8
IGLV2-23	7908.8			7027.57	7273.79	7637.22	8392.71		11060.9		7686.73	8599.31	7897.1		8930.22	9142.62	8903.1	9863.46	9596.79	7920.42	5624.6	7422.22	8727.46	8794.1		8524.8	8032.03		8927.25		8600.95	6987.88	10221.5		8315.23	9364.57	6746.62
IGLV3-21	10839.8	10537.8	10579.3	10745.8	10578.7	10737.5	12488.2	11074.9	12794.4	9466.63	10853.8	15153.6	15197.8	17256.6	13076.7	14257.7	14392.8	14046.5	16117.7	10860.5	10449.3	10187.8	12031.6	12703.3	14490.6	16946.2	10224.9	13843.2	9846.88	10785	12981.7	10929	13619.5	15910.4	14825.2	12470.7	9889.84	13176.5
IGLV4-69	5827.96	5243.68	5942.58	5695.15	5427.93	6662.73	6500.09	4687.41	6367.54	5464.5	4258.72	6861	6864.83	6015.77	6129.99	6407.45	7293.45	6068.75	7739.76	6381.44	4393.07	4672.45	5262.82	6500.02	5809.66	5827.6	5165.85	7540.55	4611.14	5888.31	5830.43	6397.08	5823.02	7386.7	5869.68	7115.89	5694.06	6142.69
IGLV8-61	12730.2	11373.3	12898.4	12029.4	12531.1		14713.2	12292.6	14651.6	12120.6	11941	17355	11614.7	15407.2	14506.4	17394	16848.8	13191.3	14833.6	14125.5	11665.8	12768.3	14546.6	13696.8	14611.4	16375.2		15927.5	13105.8	11595.6	12708.1	12485.5	15852.2	15522.7	13898.5	12654.1	12172.5	15281.1
IL18	17457.6						25163.5							30353.2		28730.1															27786.4						22045.7
IQSEC1	24776.2	25320.6		26341.5	27636.2			24643.4			27668	38212.9		42144.6	30612.5		38790.4				24093						24872.4			26503.5	32036.3	25745	35000.5				26101.1	32409
ITGA2	7640.2	12797.7		8253.78			12663.3	7710.11		7286.86	11696.2		9673.85		11621.9	15922.6		15018	13040.2	13536.4	7914.85	11955									10504		9782.58		15726.8			14461.1
ITIH2	10794.3	12593.8	12066.4	12363.7	14815.7	14338.4	15409	11433.4	18810.3	13351.7	14681.5	23234.1	24342.6	25327.2	17774	22130.7	21306.7	20647.1	20760.4	14825.1	9805.86	12713.2	14303	18498.5	16243.7	23018.1	12919.9	19157.4	13232.4	12938.1	15539.2	14374.3	18153.8	22672.2	20095	17629.1	12866.1	19550.5
JCHAIN	6785.53	6447.03	6777.93	6371.25	7728.2	6144.56	7749.78	6548.91	8315.42	6761.28	7308.81	6699.33	10181.9	9796.04	8487.46	9277.47	11723.7	10372.2	8944.94	6730.73	7380.61	6149.48	6156.47	7709.66	9156.12	10039.2	6866.28	8255.93	7427.44	7549.3	7882.4	4609.07	9679.52	10529.7	9618.69	8442.84	6727.8	8565.29
JUP	17010.4							18684														18209.8		23698.7					17289.7	18337.8
KATNA1	9947.46														10425.9												4221.94						8099.87
KHSRP	6306.62	6362.73	6995.81	6820.52	7982.71	7604.4	7773.68	6533.89	8403.86		7343.63		8677.53	9449.34	8805.08	10317.7	8360.5	8718.4	9927.96	8372.39	7433.99	7076.15	8363.38	8482.44	8992.88	8994.43		8361.83	6101.33	6861.95	7527.71		8340.34	8608.73	8468.27	8026.71	7382.21	8568.62
KLKB1	7850.5	8575.21	8656.3	9306.89	8639.92	8365.84	9575.18	8632.25	9814.14	8326.76	6173.28	11289	9717.72	10736.2	9459.4	11537.8	11204.6	9562.28	11225	8342.52	8836.96	8182.67	8899.56	10279.7	11541.3	11119	8608.18	10833.3	9093.32	8092.27	9337.02	8401.28	9994.07	12532.3	11123.8	8890.28	9306.73	11289.5
KNG1	23859.7	41760.8	41977.1	40931	48962.7	45401.7	59641.3	38880.9	59115.2	25764.9	47573.4	68502.7	48492.2	75620.9	60669.7	84108.7	53700.5	75643.3	76542.6	50079.2	32649	41070.5	48956.2	63839.2	67194.2	77273.2	24753.6	65442.4	22744.8	34287.6	47409.1	28662.7	59409	50621.2	68588.9	59778.3	28866.4	59852.6
KRT10	14547.2	15001	15731.3	15520.5	18384.1	18309.1	20599.4	14347.5	23277	16909.4	19400.6	27043.9	28634.1	30051.4	22736.5	28948.9	26251.8	26880.9	26505.4	20644.3	15070.1	17341.6	19257.7	24085.8	25457.1	21360.8	16926.8	25878	17098.9	15271.6	23374.8	18453.8	23533.9	28615.7	27504.4	22346.4	15333.9	25057.3
KRT13	10918.9	9858.06	8891.56	10540.1	15703.8	20697.5	15753.5	14720.1	20342.2	8010.11	7884.16	22652	18908.7	15028.9	24591.2	15889.8	24822.5	20019.5	14902.8	17333.4	6808.9	7727.21	13493.7	32776.7	17452.5	22472.1	11893.9	22491.3	17961.6	9953.77	20459.6	12841.8	17964.5	18722.4	22251.1	8492.95	7334.05	20735.4
KRT33B	445732		455110				635784	444701		488343	530406				657611	784940	739572				434239	487985				746812	477761		468984				707944			632531	468218	701968
LAMA3	29299.4
LAMC2	5882.86				4912.51					5532.91	6213.76	7436.33	8045.23	9252.45	7022.07		7830.57		8614.19			4911.81			8376.86	7057.21		8355.75				5474.64	7010.22	8214.91	7849.59		4882.95	7029.04
LEPR	32660.4						31654.3			31539.4		38834.8		40358.2		39399.4	39669.2	37414.4									31379.5	40226.3						43077.7	37608.2	37063.2
LRRC8B	11004.2	11969.5	13172.1	11773	15372.4	14890.7	17088		15905.5		14638.8	20662.4	20686.8		17876.4		18172.3	18654.6		28475.6	11671.3	13019.3	14606	16886.9	18123.4	20566.4	12517.2	18402	10998.7	13086.3	15881.5	13619.1	18213.6	18419	19856.8	15091.7	12507.2	18200.5
LUM	16214.8	11230.2	14223.2	11866.2	16297.5	12276.3	21016.2		12194.9	12781.6	10228.2	13049.5	15977.2	14500.7	16043.9	24292.1	13524.5	14546.7	13499.5	12357.3	8466.96	9258.13	17036.7	13255	13701.9	16013.7	14399.2	15122.5	13593.3		14956.8	15538.5	17095.3	15053.3	12897.3	16408.6	15481.5	15100.8
MAIP1	9176.41						16136.5		22828.9	16322	17178.8	25691.8	26155.1	25671.1	15191.2			23294.9	21021.9		15341.9	14462.8	14663.9	21173.8	17117.8		15670.5	16145.5	17492.1		18662	17900.2		18051.6		20918.4
MAN1C1	5096.7													8637.84			4798.43			4706.89				6403.29	5625.4	9762.29							8944.17	4952.94	8916.84	3855.32
2023-03-05	29235.3	36574.9	38448.6	30601.8	38644.4	39055	43135.5	31595.4	43318	37753.5	40942.1	59078.6	60249.5	67466.3	50795.8	58534.5	57923.1	56326.4	60310.6	34401.3	30719.6	37726.1	34436.4	52412	48267.7	60534.2	39503.6	53267.4	37636.6	24372.2	42401.7	23286.8	53211.9	61077.6	55153.2	29954.1	33235.3	53342.6
MCM2	3046.73	2227.08	44241.3		3724.44	46699.4	59914.1	39289.1	58257.3	3448.04			76556.3		60240	76953.3	73943.8			2548.05			4095.1				2267.61		2738.59	2331.56	57725.6	46498.7	4135.47	4902.67	70521.3	4113.09	39480.7	69171.8
ME2	20033.9		18095.9		21503.1			18233.3		16341.4	22527.7									19697.3	19470.8						18912.3
MGAM	13254.6								17868.3	11072.9		20039.1				19014																		20930.4
MMP2	2145.16		5195.97									4939.56	14282.4		3964	4001.33		7028.78		4277.78							8720.12				4105.51	9378.27			3753
MMP3	19259.7	18857.4	20296.2	21104.4	21524.5	20129	24720.6	19397.3	10700.7	20190.7	21205.8		29186.2			28507.3	27571.7	12922		21114.9	0	20301.6	21537.6	19403.7	30606.4	13717.4	9144.22	11801.4	18310.3	20016.3	23895.3	21197.7	12393.1	13420.9	26818.3	26058.8	19771.9	27557.4
MRPL11	42805.9								50378.4																								59275
MTTP	57041.3					68934.8				61106.2			152897	159747	102438				136542	78950.7	57204.9		74584.6	114476			61072.1	123833		59020		72009.9			128755			121340
MVB12B	22879.6					42778.4			32420.9					74804	53530.9		43070.8	65306.1		44235.9			26722.3	59464.6	59106.4				25493.2				39457.2			51424.8	37127.3
NDUFA10	12652.8	13796.1	13990.2	13516.9	15177.5	13812.9	16574.5	14106.4	17981.9	14307.5	15363.6	19824.8	19769	23182.6	16366.1	21046	22407.2	21680.8	18720	12903.5	14343.5	15161.9	10036.3	19218.3	20242	19589.8	14298.7	18335.1	13070.4	0	17433.5	15438.8	20088.4	19583.2		16924.4	8925.45	18465.1
NDUFS8	29263.6	28800.2				34236.4		31460.2	39406			48098.3		48433.2		47913.9	46460	47268.1	42947.5	33843.7	30529.9	28864.9	34713.6	41467.4	44399		29890.4	44551.5			38382.9		46731.2	49879.6	44435.1		28757.1	43418.7
NEO1	2116.6	1834.26	2176.19	1552.04	3334.99	3780.86	1480.82		3078.26	2913.07	3130.86	3120.39	3492.96	1861.92	2492.91	4104.3	2005.29	2698.45	2051.85	1963.49	1554.94	1908.11	1844.26	1798.26	2124.73	1947.62		2132.66		4330.57	2745.71		5796.68			3600.05		2086.9
NT5C3B	4238210	4.16055e+06	3.49896e+06	4107550	4.72638e+06	3.19056e+06	4.89753e+06	4.25062e+06	4.44254e+06	4.39674e+06	3769783	5511550	5574420	5764980	4.22281e+06	5.48121e+06	5.2949e+06	5.22806e+06	4.07649e+06	4.90824e+06	2581070	4193170	2897990	5.04045e+06	4958350	5.3611e+06	3625103	5.38837e+06	4738580	3.97169e+06	4.8568e+06	4.55255e+06	4.92335e+06	5.90889e+06	4515760	5.18248e+06	4.27188e+06	4731810
NUP160	17693.6			16402.9																							19840.1
ORM1	59482.6	57522.7	51510.8	59609.4	67878.1	67485.9	78480.3	51177.9	72622.7	56961.8	68941.6	80944	96087.1	103795	76253	104873	86561.6	94719.5	75461.9	67323	58369.4	60909	68494	72709.4	85002	98881.3	55686.4	87931.3	62511	59831	74082.6	65031.2	72812.9	103418	90762	82930.9	57873	86997.4
ORM2	23429.7	20733	19870.6	21200.4		33271.3	33979.3	0	34262.9	29404.4	15143	24805.6	23486.6	24737.5	36885.9	23095.6	35745.5	24446.6	39993.6	20973.1		22065.7	28689		37390.5	39464.1	28593.9	21527.7	24736.2	20561.1	31039.5	25139.7	22539.2	25410.2	35312.9			37057.5
OTC	6703.99			7564.28				6660.23															6609.05									6858.59
PDCD1LG2	2425.41																					2894.58
PDIA2	5172.06
PGLYRP2	10225.6	10192.1	10168.3	10297.4	13295.9	12698.6	15576	10238.6		11169.6	12885.8		20113.2		15822.6		17587.3	18333.3	17573.9	12989.9	10447.6	11317.6	13389.4	16662.8	12476.3		10784.1	18027.1	10771.2	10044	14414.7	12632.3	17179.7	19933		15769.6	9949.94	16773.6
PKLR	1932.67	2080.23	2148.36	2297.09		1629.89	2442.25	2451.27	2168.28	1975.68	2591.94		2711.39	2230.79	2730.37	2639.06	2604.09	2555.78		2341.46	2209.44		2214.82	2516.95		2830.08		2497.08	2327.12	2230.06	2816.48	2269.57	2744.14	2362.19		2635.1	2099.01	2351.51
PLA2G12B	21621	23073.7	19083.5	21543.5	24554.5	22514.2		18611.6	20572.3			39039	42422.5			29631.7	36714.2	27819.9				20695.9		30995.9	34232.7	33852	21229.9	37722.4	20670	20202.3	25896.8	22803.9	31251.4		35746.7	30215
PLBD1	9050.55	9767.8	5670.98		11162.5	11311.8	12117	6628.04	8430.22	9349.74	9891.06	12981.6	12652.7	8192.03	9094.13	13316	12439.3	7806.53	8592.98		10315.4	11222.1	9773.42	7192.95	12762.6	6201.84		13272.7	6233.87		7809.91	7333.77	8143.39	7293.24	7246.74	11268.2	11484.9	13135
PLG	20744.1	21434.8	21373.4	23613.7	24067.8	24717.8	27886.6	21503.6	30322.7	24046.5	25446.6	31262	34258.1	34184.2	29308.8	34874.8	33251.3	30909.7	33226.5	26258.5	21271.7	22703.4	26836.8	29756.8	30761.7	32796.2	22713.2	31398.4	23371.2	21894.8	27878.2	25812.9	30925.5	35852.9	30631.2	29175.5	22826.8	32375.5
PMEL	7904.22		6039.95		8265.29	6417.78			11330.7	6848.56	7112.81		9620.95		7730.1		11348.8		9403.81		8263.31	6441.16			13243.7	7598.13	8139.08		7846.61	6782.64					6858.84	10591.3	9166.36	7854.08
PPP6R3	16267.5	19025.9	21890.1	24404.8			27361.8	23394.3	33919.1	25862.8		41352	45837.8	45767.7	35568.7		40918.5	31841.3	34700.5		22454.5		24111.4		37256.8	39438.9	22146.2	37558.8			31434.2	22745.2		38124.9	40033	34609.8	23193	36264.3
PRB3	2799.37				2552.72			2846.74											3372.97		2464.25
PROC	1487.99		1994.91	2515.81	1393.17	2441.46	2651.81	1811.04	3031.27	2570.56	2609.12	3023.11	3268.82	3254.14	2517.34	3265.81	2714.92	3164.46	2820.83	2416.16	1211.33	1939.82	2188.11	3470.54	2673.37	2719.56	1622.88	2115.79	2340.36	1726	2686.11	3284.52	3215.34	3075.38	3077.28		2330.64	2400.37
PRSS1	13511.1	7164.92	15364	11748.2		15974.4	18619.7		18667.2	14756.8	16462.7		27749.7	10447.7	18381.1	23731	19505.2	22055.3	20048.8	14933.9	14327.8	17989.3			19816.3	23135.5	14078.8	24572.3	12989.8	13564.5	18140.4	16981.9	21469.7	27475.8	19900	19151.6	13970	21429.6
PSMD11	56234.1	55648.4	57874.9	49653.8	68216	62983	62305.6	58945.2	65186.1	63780.9	40069.6	74611.4	74594.2	81236.6	64638.6	72707.6	72582.1	73834.9	74963	51820	42531.1	59248.5		65539.1	68538.8	71908.9		69881.2	35222.2	55434.9	60037	64440.4	70696	72607.9	80506.9	72213.9	44002.6	78672.3
PSME4	55976.6		55956.7	59801	58491.5	55792.4	68942.2	57136	68296.6	55975.9	59436.9	80724.4	81408.5	84661.9	69752.4	85269.1	76923.6	77688.2	82873.6	61150.1	54183.1	57899.4	57155	72727.5	75313.3	80857		77754.1	59206.9	53823	67678.7	60612.9	74799.8	85682.9	74066.4	68257.2
PTPRS	25749.4	29532.8	36145.3	36075.2	40819.4	32807.3	45068.1	35320.5	45917.8	37306.1	40137.9	49718.6	58394.6	64865.5	49141.5	51102.8	44918		47906.1	39334.9	32247.6	17330.2	41072.4	50831.3	43719.7	55121.7	29092.5	52464.4	29219.8	35765.5	46732.4	40716.3	53480.3	59435.5	51165.3	36068.7	34535.2	52478.8
PYCR2	10559.7		11472.8	12909.5	14589.6	13276.8	17388.8	10374.6	18134.7	12772	13860	22468	20900.5	23755.5	16256.8	20565.8	18913.8	19689.6	19147.4			12299.5	14172	18773.9	17877.6		12231	19593.7	12193.1		15499.9	13637.5		22158.6	18642.1	16438.9	11680.9	18905.3
PYGL	5771.33				23560.2	20058.5	24007.7	21009.9	18099.1	18956.8	23757.7	19271.5	27215	17665.8	13600.1	18684.5			17668.1	21649.2	18457.9	21588.8	23172.4	23912.3	26144.2	26247.4	15693.7	24905.1	12827.4	21198.2	14357.8	20571.8	26379.3	19210.1	21762.1	23632.2	13513.9
PZP	4945.01	1848.27	40573.8		4018.58	5169.73		5391.57	3522.44			6404.47			60338.2				2299.98			6246.55					5579.84	2172.69	2788.22	4453.45	3687.26	2304.25	2563.01			58017.3	38697.6
RABGGTB	4751.56	4739.66	5562.42	5154.88	6188.6	5703.29	7505.11	5468.64	7380.59	5379.48	5336.27	7784.8	8037.79	8705.28	7732.23	7978.74	7597.96	8773.62	7996.32	5255.35	4692.85	5597.44	6031.95	7256.13	7337.36	6097.29	5383.43	8669.61	5040.62	5015.78	7557.38	6147.83	7201.45	8208.01	7744.13	6519.98	5631.04	8070.88
RACK1	12170.1	8769.97		12679					4423.04	8657.62	10461	14369.5			15274.7			13566	20600.6	9960.3			12797.3		18305.7	17853.7				3414.61	9675.6	3401.76		8890.55	19036.7	14009.7		12841.4
RAP1GAP	47706	44982.3	48854		63445.5	55176.2	77750.6	44651.9	75542.1	50443.5	55111.9	104181	102958	111837	80198.6	104432	103184	102098	103911	63185.8	43223.4	46702.2	58484.2	86740.1	94822.5	100701	49380.9	94038	47252.2	47577.9	73204.3	57180.8	95634	112279	95204	82061.4	48309.6	95051.5
RBM47	7378.93	6065.8						6703.51	9016.6	6361.91				11998.3	8604.03			6216.28				7761.27		11518.3	10685.8	9998.32				6438.26			10664.9	11965.9	8929.17		6735.72	9636.36
RBP4	6777.76	10983.7		11444.6	14197	15008.1	11576.5	11934	13995.5		14185.5		12328.8	13077			11344.9	20946.5	23689.8	16363.1	12054.6	11352.9	14315.7			16494.2	12822	18882.7	6522.88	13031.8					16117.7	12757.7	10145.4	3074.23
RELN	13328.1			14334.6	14654	15534.2	18321.1	14541.2	15738.2	14081.1				20411.1	15440.2	20457.1			18317	16249.9				16807.3	21294.4		13288.1	18218.4	13877.8	15239.3	4438.01		20307.3		16136.6
RIF1	9299.65		12843.5	9522.4	14559.3	11446.8	17190.9	12771.2	17852.3	14007.2	7673.29	20359.8	20212.7	21720.8	18720.3	21448.4	21672.1	21020	20549.6	15860.6	12239.3	13279.9		12261.3	12343.7	20671.6	13800.8	18604.2	10515	13318.3	18302.9	15470.1	18835.8	20639.8	19324.1	18931.8	8974.64	17955.7
RSU1	125208	131344	139231	134919	176588	163814	220041	121855	213096	140220	161648	275694	284595	304690	220366	277044	267257	256564	262447	165798	131001	108515	158657	230508	250210	275914	142107	250029	136741	131810	213362	171780	243777	291394	251345	171643	130399	245554
RTCB	293523	314610	0	316797	370247	352389		319785	438690	310740	353103			585408	445112	569303				387838	316225	306108		468967	495695	534308	313091	493544	314697		416416	362340	500499		512215	437809	315837	509511
S100A6	439386	447845	450520	350656	554175	527602	669870	473727		528197	499293		758471			750591			768202		480506	541237	547268	670225				748757	506519	487504						571457
SAA4	10275.1	6530.94	8429.15	8673.83	6121.34	9333.67	7445.85	8587.02	17177.3	11485.7	11562.8	8099.23	7698.35	8877.37		7181.2	6694.79	7894.28	7900.3	9847.87	8729.95	7151.06	9555.53	7424.54	11736	7742.61	7802.36	8732.05	10569.1	6414.79	6058.18		14989.9	9693.45	7531.51	5323.86	7339.28	8684.97
SAFB2	11126.1																					11850.3			11967.1				10437.3			10738.6
SELL	3012.44			4057.44		5177.09	7839.73	3866.09	5156.54	5300.99	4954.39	9063.78	6775.43	10014.3		6716.85	5230.61		7786.08	4484.14	3366.17	3826.32	4142.91		7340.48	5893.03	6588.26	5255.44	3307.96	4054.29	4333.83			7458.99				5021.22
SEPTIN7	8911.02	9513.65	8111.9	10196.5	9463.07	9844.24	11261	5144.05	11426.1	11477.1	12806	11686	11728.6	10905.5	12757.9	12120.2	11566.6	8631.8	14882.2	9613.52	9643.87	9564.31	11221	11578.1	11433.2	15524.9	9193.52	13323.2	8215.88	10459.9	8343.52	11310.7	11921.3	12067.3	14828.7	13752.8	12623.3	10414.9
SERPINA10	1312.03	743.493		1727.43		2281.87	2131.8			1500.16		3173.84	2948.73		2556.49	2937.93	2878.57	2023.96	2891.05	1972.91				1967.08	2877.59	2544.97	1291.24	2531.7	1861.78		2319.39	2147.58	2517.23	2837.43	3051.43	2368.27		2723.48
SERPINA3	16348.5	18266.2	17508.7	17956.3	18941.8		20433.7	17246.7	21861	17561	19646.5	24173.5		27179	22500.9	25497.2			27639.7	19103.5	17819.2		19210	23655.4	27345.5		18463.4	24424.1	20388.6	18841	21243.9	18432.2			25595.4	20003		24407.2
SERPINA4	13410.4	10639.5	14095.2	13891.3	12823.6	12295.1	14506.3	14472.2	19328.2	14362.2	10303.1	18859.2	23062.2	24915.3	15036.1	15503.3	16352.3	18665.8	15231.6	16022.6	6982.23	15560.2	7824.52	14953.3	20233.9	17420.1	10687.4	14330.4		10027.6	13096	12197.9	18958.9	20702.7		16471	14347
SERPINA5	4469.53		2688.23	3564.18			7344.91		5990.94		2720.8	6139.36	5416.93			5900.34	5856.94		5494.6	4006.86		4274.75	5520.82	8332.03		8269.12		3750.98		2962.77			3644.52	7544.5	5814.3	3641.32		4143.73
SERPINA6	7784.89	8631.38	8633.01	8662.03	9838.17	10418.8	12723.4	8773.36	11298.8	9581.01	10330.9	15330.8	16303.1	16263.9	12479.2	15746.5	14239.4	13619.4	14462.4	9973.11	8207.69	11654.2	10021.9	12058.1	14511	15794.9	9616.9	13314.5	8745.26	8998.45	12616.6	10473.2	13229.1	14560.7	11230	12141.8	8315.47	14452.9
SERPINA7	1294.42	1248.74	2462.56	2516.33	2870.03	2965.69	3191.74	2676.14	3815.14	1203.7	2762.97	4885.43	4637.27	5153.18	4121.07	4514.87	2269.17	3902.72	3682.04	2929.22	1380.48	2796.1	3657.43	3481.42	3737.61	4291.59	1741.03	1685.81	1260.81	2469.94	3029.55	2789.26	4259.42	4663.3	4646.99	2631.56	1255.11	4325.05
SERPINC1	2268.14	1294.89	2453.57	1842.24	2271.26	2385.88	2283.87	2948.38	2567.04	2666.99	2179.96	2301.03	3136.53	2934.74	2259.05	2523.84	3451.46	3028.59	2500.43	2101.82	2487.14	2321.23	2396.5	2415.82	2862.26	2401.36	2093.03	2120.33	2080.87	2428.21	2191.81	2791.27	2757.25	2576.19	2173.76	2518.34	1634.59	2879.85
SERPINF1	5430.86	7535.12	6389.45	6598.06	7709.42	7325.35	8209.12	6647.39	7186.15	8033.97	7013.8	9621.31	8415.03	11192.2	7847.44	10914.7	8769.8	9201.35	11040	6837.39	6312.67	7922.16	8201.05	8997.46	8484.68	9105.44	6797.52	9351.71	7430.44	8271.88	7662.78	7137.67	9525.31	10590.5	8442.63	7840.92	7353.68	8110.03
SERPINF2	14036.5	8731.34		8602.67	10879.9	11736.6	9807.38	7948.14	9344.69	12108.5	12638	17604.6	12865.1	13685.4	9459.64		13304.5	8910.1	14582	8480.91	12894.9	12451.9		11360.9		13999.7	10754.2	10536.6	8120.99	11282.7		8540.47	11303.9	11799.5	9881.89	9505.1	7547.53	10536.2
SERPING1	5920.08	6378.59	6584.71	6918.22	7698.8	6753.57	7727.45	6255.24	8070.2	6056.91	7129.45	9144.37	9193.67	9908.36	8456.87	8950.9	9497.61	8615.03	8395.34	7421.61	6136.71	7073.94	7383.64	8258.28	8673.46	8746.54	7142.84	8228.21	6249.6	6065.71	7920.53	7140.69	9004.44	9145.84	9096.01	8269.18	5514.39	9533.09
SGCE	496041	546162	560507			665055	838483		855021			1045240	1142770	1173760	868417		1064380			725496		610217	718163		970686		604881		564582		807371	711704	949966	1105450
SGMS1	180117	182860	185355	172244	153879	185058	218511	185259	216173	173586	159204	258928	222011	283384	227004	271825	261334	219584	273914	191538	177934	149193	190087	230036	230135	251755	182903	212043	161049	186332	212589	176709	246010	265706	239386	207022	177776	234874
SIRPB1	6701.6	6276.9	4497.84	6601.91	5760.7	7226.7	6138.18	3737.65	7195.12		3996.77	4544.21		5476.2	4556.26	7141.21	8534.36	6185.71	5907.56	4026.26	4500.44			6251.86	5646.94	5885.41	5926.78	8200.39	4514.57	5987.67	4750.45	4247.74		6585.36	5658.07	4710.65	6550.61	5602.74
SIRT2	18838.5	18590.5		16077.8	17365.3	17075		18269.4			18411.6							20524	26484.7	17697.7			17237.5				16580.9	24965.5	17695.7				23469.1	27571.4		21437.3	16198.7
SOD2	118164	123625	97587		121288			120041	142432		119453				142731	128498			168959	121909		121336	122704			14635.5	127177			120210		105986		11978.5	148403		127059
SPON2	8656.83			10492.5	7321.21															7948.16											9801.99							8656.05
STIP1	5693.94		10753.1			10436.3	11915.3	4982.26	12218.2		10774.6	13553.3			12459.1				11023.2	10688	5900.42		10587.6	11800.9		12935.5	10811.8		12077	11050.8	6647.05	10139.2	13050	6090.33
STXBP2	6489.59	6564.39	5989.24	6761.3	6869.41	5467.44	7723.2	6506.15	6988.21	6643.79	6177.5	7953.9	7977.47	9249.45	7839.02	7771.92	8283.5	7760.89		7889.01	6630.94	7614.61	6773.45		8535.19	7724.16	6605.28	8890.12	6205.61	6097.12	8276.25	7252.66	9024.09	8049.02	9359.14	8654.49	5826.65	8573.26
SYNE1	26389.9	26636.7	26048.1	29533.2	34724.9	32455	36709.9	25868.8	38182.3	30977.5	32227.7	47522.8	50477.8	46146.1	19606.9	50826.2	44781.8	45943.6	44035.9	33430.9	27297.1	27314.9	33656.1	42492.8	42165.1	49936.8	28368.5	44697.5	29819	27988.4	39237.7	34692.7	44160.2	50034.3	44978.6	37427.9	27189.7	44152.7
Serine/threonine-protein	29470.7	28282.2	27692.2	30257	30301.9	28842	37110.7	26247.4	31471.1	28800.8	29767.3	42352.7	45309.9	44530.4	36547.9	45070.2	34817.5	42032	43474.3	31319.4	27341.4	30342.4	30886.3	38222.1	41714	42378.2	28359.1	41111.8	29707.8	30210.9	36891.1	31786.7	39426.8	48243.9	40498.8	38103.7	29890.9	39056.1
TALDO1	686819	760426	765583	767510	843288		829986	789743	1030030	774097		915717	916736	991110	1030270	1187560	1092845	903648	1218050	883470	732664	727880	834155	1044000	1147730	1107220	536449	1048850	625279	787483	972723	871661	1076510	960742	1101580	1010520	808768	808165
TBCD	13386.9	12723.1	13793	13278.9	15048.4	14232.6	17694.2	12177.1	18810.1	14417.3	14691.6	20178.9	20139.2		17301.2	20127.3	21146.9		21547.6	16571.9	14507.6	13774.3	14766.1	18360	20290.2	21199.3	13727.3	19206.2	14662.7	14835.5	17302.2	17055.4	21998.8	25250.5	21998.5	17542		21571
TFAM	21805	19695.9	24213	23727.2	14693.8	25804.6	16453.1	12518	30649.2	14055.9	24525.8	20672.7	36532.5	41480.6	29917.2	38585.6	35227	35806.7	40424.8	14890.2	12544.9	25117.8	27472.5	29724.8	17372.4	22742.2	15153.6	34604.1	13298.7	16139.1	17333.7	24912	35092	39695.8	20786.1	17873.9	23752.6	33261.5
TIMM44	18190.8	17569.4	18118.6	18610.3	21554	20818.7	23651.2	22489.8	28016	18945.8	20289.1	28619.6	29712	31364	25285.7	31970.9	26058.3	28274.8	26583.1	20229.5	18053.8	19988.3	23931.9	26193.8	31853.8	27532.8	18332	26814.6	20051.9	18970.6	25603.7	19650.5	25522.4	29512.5	25472.1	22265.7	18875.5	27242.6
TKT	10243.5	10166.5	7941.76	10332.9	12100.5	11455.7	13999.6	10001.3	16970.3	10768.7	11214.5	17634.7	18649.3	21326.5	15212.9	20194.9	16491.4	17061.5	17519.3	13703.8	9938.84	10120.1	11515.8	14824	16432.8	18435.9	10412.2	17658.9	10833.4	10469.4	13111.4	11555.1	16255.7	18579.9	15593.6	14387.8	9859.97	16476.8
TMEM198	973720	1.0327e+06	1100600	1044749	1254970	1.08392e+06	1444110	982669	1.37941e+06	916074	1.21906e+06	1.60327e+06	1.31351e+06	1691750	1536440	1644450	1.69357e+06	1.92746e+06	1.74545e+06	1.29512e+06	903761	1.05474e+06	1.27347e+06	1.53476e+06	1.62579e+06	1933540	967949	1626040	1138570	929844	1238030	1.10519e+06	1678590	1.80983e+06	1.69442e+06	1.4442e+06	1017210	1407160
TMEM256	110263	42360.1	50352.7	68006.5	57613.1	81434.3	57319.5	49509.4	104166	25811.2	77679.9	119815	210582	237606	59365	128111	188467	86534.3	44073.1	76744.3	53136.8	63422.7	77647.6	187436	199238	180016	86560.9	80122.7	89988.9	39435.8	69070.1	49601.1	186371	174030	65963.9	34963.4	37395	81194.3
TMEM40	3985.86															3761.65
TOR4A	7727.88																9819.01												9989.82							10767
TTR	8660.86	9022.55	10127.1	10205	11602.7	9336.24	12042.6	14579.2	14270.1	11198.4	9467.8	12091.1	17073.6	15280.7	13775.4	17825.3	16242.2	12410.3	16430.1	10438.1	11513.8	11353.9	11779.4	15601.6	13584.7	13616.1	7250.22	14550.6	9880.92	11484.2	9972.92	10047.6	16142.4	17047.3	13570.1	13069	11427.5	14361.2
TUBB1	9591.61	10590.4		11273			13117.5										12987.4									11363.7			6851.59				12893.3
UBE2N	16913.1		7365.15		5739.68	18480.9	7823.56		12509.9	16799.4			8146.65	13659.1			10346.4	12216.6					7266.48	8586.07	10134.2		18678.4	9019.44		9365.31	8113.64	6658.3	9192.23	8029.93	8281.85
UQCC1	157560	204726	216373	171437	203641	191880	228232	163653	235067	177260	189646	291600	368124	314524	289293	379013	267837	274062	275536	247755	162588	166694	187529	241289	257517	280653	178734	258862	168576	165571	217807	185296	260882	308110	344313	282968	169458	266302
VPS35L	6931.2	5920.23	6079.41	6655.93	7378.3	7384.74	7606.33	6284.68	10195.4	6159.75	6897.32	9806.13	10977.5	11574.9	9049.02	10840	9825.48	9512.17	11198.2	7742.1	5270.59	6675.24	7214.1	8065.86	10730.6	8740.43	6376.52	8694.46	6322.14	6901.59	7782.13	5893.89	9351.13	10372.4	8590.34	8138.49	5316.8	10872
VSNL1	108896	117850		117150	126378	128782	92797.5	110063	153924		129747	195358	192217	198855	158852		179164	79647.4	178652	130004	112086	122916	124908	161153	172316	180595	123692	167678	115746	117095		132933	174354	192430	164431	152386	115448	167653
YWHAQ	6420.86		5748.59					6592.98	7783.69	6158.9					7829.77			7931.94	5178.35		6122	5815.76	6712.1		8627.11					6232.4	8247.2			7896.96			6210.29
ZFYVE19	63393.7	65523.4		66674	67360.7	67764.8	82292.3		82893.3		70615.6	101989	104840	103408	81754.2	100653	97437.4	36092.6	96383	73675.6	63477.7	65586.6		84841.9		100834	64764.6	90361.7	65448.1		81851	66923.4			91728.6	80385.2	62787.9	90479.8
ADGRL4		8159.63
AKAP2		15183.6								15293.9			29096.2	30235.1			27558.9			20943.6							17777.7	24717					24674			22741.5	15609.8	25423.6
APCS		2614.08					3932.5	2754.23	4655.13	3120.96				5544.36	3991.98	4760.76	5208.53		4981.84					3919.06	4356.93	5141.04						4820.26		4785.48	4696.28	4345.75
APOC1		7316.01	4932.41	8383.96		5243.23	5893.48	8998.39		10536.2	9634.8	6121.2	9377	6736.52	10083.2	5940.1	6550.61	9535.46		10365.2		8556.17	4742.24	12120.8	6997.76	6156.41	7654.8			8747.52	6659.06		6229.99	7180.18	6745.21		10878.6	6342.84
ATP5ME		18419.4	14882.6				21557.5	18326	22968.9	16687.5	21030.9	23613.6		24897.6	23386.7	25957.3	23659.2	24574.1	21060.5		17901.1	20669.6		26155.3	23373.1			21757.3	18908	18947	21055.6		17231.2	22036.5	21584.9	21788.4	19165.8	21768
B3GNT8		8404.08
BCR		36252			32439.2	33870.8	35154.6				35306.5				39827.2	38491.4		42088.4	42805.2		33473.9	33801.8					34392.4	41085	32824.2		20816		41690.5		22800.1	38345	34590.6
BROX		8531.61
C1RL		4457.96			6230.71							8568.69		16159.8		7541.21	8840.59	5858.82								8185.42	5290.55	7434.97						9194.86
C2orf88		8874.83		10065.1																	9108.08			12027.7
CETP		4727.18		5025.06		5518.79	5404.66		5301.14		5445.29	6038.59			4941.97	5585.24	5992.07	6181.72									4719.93	10783.5	4878.3	5170.1		5182.47			4966.65	5141.52	9785.33
CHTOP		2560.58						2823.2											3479.57						4981.06
COPS2		19348.2		18030.9	21833.8		32100.9	19499	21082.2	11085.3	8310.75	31374.7		28319.2	19342.5		20546.7	30112.4	27210.6	18993.3	17012.9			20479.9	26605.4		16122.1	22736.6	19518.2	15587.1				32955.7			17324.5	24963.5
CRTAC1		10372.3		6704.21	11207.8											11313.2	14154		12875.2									15687.2	11548.8					12220.6	15425.4		9892.61
CSTB		10373.9						8925.5		9741.75			13968.5				14425.7		13891.9		9492.58	10016.5			15003.4			13918.1	8923.8		12815.4	10290	14991.5	14358.6	17365.1		7747.13
CTIF		4329.69		9350.46																									9483.45			6198.62
DIDO1		54612.9			58371	54254.4				49089.2				72504.8							53135.1	51805	56272.4								59337.8		66095.7		67923.1		52925.9
DPP10		7595.16		9653.1																								10647.4	6388.29				10366
DSC3		17359.1																			18214.8						17184.1									24222.2
DSP		3292.86			3213.3	2835.03									4021.26	5057.02	3972.9	4761.31	4849.17		3840.64		3759.66	4587.01	5309.82		2305.91	4867.72				3564.86
ECM1		3444.3		4538.26	2832.34	3420.98	2047.25			5057.54	3783.75		3797.14	2678.17	3516.53	3697.14	4577.61	6915.35	5874.4	4380.61			4067.96	5843.69		5278.86	2015.71	4491.3		4275.41	3622.12		5151.98	3190.81	4457.18		2527.64
EFEMP2		7050.49
EHBP1		9754.79			15815	16273.4		10440.7		12440.8	15855.4		31682.3	35912.6	20890.1	31900.3	9835.37	28200			9766.02	11189.4	16799.8			28059.1	13998	22678.1	10555.3		20290.4	16407.3	27632.3	34603.3	26736.2	21164.3		26891.9
ENDOU		10570.4			11354.8								15488.8								7132.56						8323.35								14412.5	12576.7
EXOC8		3271.29						3008.8	2202.61																												2791.98
FAM3B		13389.2		13299.9	12360.6	11069.7							14196.2		12468.5			14079.9		11035.6				13253.6	14632.9		12963.1					13394.9			12031.2	13712	11643.6
FGB		11627.4	12661	11401.3	14271.5			12562.5		12003.8	12060.2	14047.4	13188.9		14825.1							9895.8	12351.9	13569.3	4396.22	14286.9	4944.09	13182.6	12375.8	12877.6	13264.3	14326.4	14959.6		11753.3	11033.3	12886.2	13179.8
GK		14333.5	16380.8	10001.2			20326							19333.9	17298.3	21479.7				18404.3			16378.1									17577.6				18175.3		21772.5
IGF2R		9169.42		9778.6												12965.3						10010.5	11259.9		11001.1			11412.4								11932
IGLV2-11		16478.6	14453.4	16558.2			28136	20018.1		17662.2	25823.8				26954.1		31693	27510.2		23784.1		23433.5					19856.4				27073	24021.2				22727.8	21989.3	21810.3
ITIH3		7919.46	8034.46		8690.23	5867.98	11355.9				7239.02	11361.5							11085.3				7837.94		9085.08				7649.37	5952.68	8043.99						5316.06
KCTD12		11985.9	11677.6	12443.9	13464.3	13302.1	14376.3	12430.4	17224.1	12081.1	13315.3	18697	18016.4	17769.8	14645.6	14735.9	17134.6	17478	17150.2	13113.9	13208.8	13899.1	13267	15921.9	16690.1		11803.9	16411.8	10993.9	11813	13406.1	14299.7	17166.1	17921.9		14821.1		17054.7
KRT78		13082.1		11440.4	15297.2			12299				29344.2			18433.1						15270.1	16731.9		21576			11493.5	22131.6	9066.07		13624.4	20894.8	25391.7		22866.2
L2HGDH		29355.5	37295.7	36338.4	42808.4	36217.8	46963.7	33111.8	49275.1	33046.4	41343.6	64523.4	68514.3	71646.8	47862.1	66968.2	62282.4	61481.2	58574.3	44638.7	32783.2	33910.3	42912.5	53539	53490.3	63510.7	34328.8	53331.6	30225.9	29780.9	47057.1	42302.9	56743.9	67530.3	53360.7	42609.3	34493.7	49685.4
LACTB		10657.5				13848.4		11230.9	15382.1						16405.2				16885.1					15129.2		16140.3		14046	11169						15901.8	14928.6	10985.8
LAP3		647962							531281										930362		528932	156106					421080				524712
LRSAM1		15507.2						16388	22247.7	4937.96								22841.4		20071.8	15367.5	17591.2	17965			21366.8	18005.9				3556.96	2847.97			22814.5	19171.1
MAT2B		5866.26	5451.08							4756.87	6505.15	8824.25		10933.8		7409.28	8010.51	7965.97	7811.89	5082.45			5801.45	7407.95		9239.07		8405.85	5133.01			5491.23		8081.95				8309.55
MIA3		8940.53				11681.3	12910.4	9951.19			11685	15878.2		17646	14903.2	16657	16346.8	14600.5	16097.4	11811.4	11408.8	9990.23			13537.4	9576.49		15146.2	10383.5	10495.9		11779.1			15031.4	12171.6		14773.2
MRC1		18878.8														45544.1			36948.3								21549.6					22133.5		43158.2
MSRA		4478.58																					4258.81
NCOA7		16561.7								24578.7																		21007.2	18253.6
NUTF2		17958	20044.9			24081.6	33827.8		31586.1		26205.7		46304.8	40323.7		43176.9	41439.6		39753.9			23322.9		35500.6				38708.4					35007		39008.5			36283.3
PACS1		14040
PBRM1		8612.98			11191.5	10696.1							15604		13695.2	15455.5	13878		14623.2			9059.52		13444.6	13928	16445.8		12825.1				10881.4	13007.1	16840	14777.5	13754.1
PLD3		37558.1								37884											34655.7	38977.2				66174.8			34014.3	36552.4	46736.8						36661.6	58817.5
PLEKHO2		14167.3		24423.1																														43512.1
PON2		10292.1	12296.3	9540.98	12997.4		13976.8	9582.58	13786.5	10041.2	10152.5	15545.3	17977.2	18775.4	14673.9	14150		15188.8	14079.4	12756.2	8854.79	11131.6	13856.5	12802	15641.1	17395		14455.6	12817	10439.7	13694.4		16060.2	15743.1		14300.2	10176.4	14249.3
PPIL3		17206.8	17135	16897.8						17314.1		31221.5	31312		25659.6			29995.7				19575.9	21118.7		27324.7	23815	18963.1		17410.4		20509.5	20141.1					16084.7	23876.8
PPP6R2		10863.5				12750.1
PSMA5		12401										10550.8										13308.6			18115.2		12572.9			12245.1
PTMS		5020.43																		27682.3														42201.5		31770.4	27608.6
RAB10		41499.8		41943.9					53718.7				52879.4	52899	52321.1		54410		55516.6			40578.1		54891.8		54190.1	41160.3	60298.1							59521.3	56373		60080.6
RABIF		42417.3			49286.5	45793.7		38139.5	62501.4				74067.5		65229.6					52873.8	36948.5	41434.9	49573.9	69928.6	66654.7				43311.1		60895.3	49105.5	71253.6	77060.5	71548.8	63453.6		73265.6
RALGAPA1		10122.9		4835.26	4471.99				8249.75									18858.6	7089.02	13238.4	4681.51		5094.48	5243.7	15793.2	7146.56		10563.8					9283.58	10363.6
REC8		380403	384109			463513	647810		654890	409572	475512	979149		1080410	658126	1011330	920501	929462	843228	524966	366901	419092	486664				405071	836956	401566	395325	615325	481795	797984	1026030	842012	664252	391339	825048
RPL19		3448.59																			3499.39				4561.49				3389.43					5031.07
RUVBL1		6331.41			9536.06	6240.82	8872.69		10114.8	6182.27	7858.44	11059.5	10981.3	11766.8	9896.6	9622.38	11606.5	8840.49	7483.94	5774.89	6065.21	6902.61	8628.83	9239.29	10547.3	12314.6	6785.3	10077		6755.45		6860.8	10651.1	7019.37	11917.2	10326.5	6742.46
SCRIB		12044.3							15840.7	9731.14	12395.6			17950.8			18428.3		16815		11382.5					19185.4							16996.1	18240.3	17352.6
SERPINB12		42118.7						43893.1	53751.5	43738	49934		69127.9			72018.6	66420.1		63570		42514.7			57839.9					45357.3					66728.1		56322
SLC38A10		108346						108817		116639	135322						253588		260163								117527					143761
SMARCA2		28043.9	29451.7											61144.8								28208.8				52246.1
SPAG5		12039.2	10977.4		19972.4		20721.6	17480.6	20610.5	20254.6	15687.2	19538.2		22756.9			21167.9	25631.6	12306.5		15363.2	17566.2	20578.5	12709.3	21520.7	13137.9	11897.7	11256.2			22226.2	18995.2	19083.7	20274.5	22403.3	21520.8	18435.7
SPG11		8938.09	7692.37			10137.9			11855.4		11105.3	9618	13819.2		9137.75	12377.2	12615	12938	12787			9451.03		12231		13474.6		10704.6			11141.5		10058.7					12795.2
SPTA1		3909.47				4558.72							5301.83			5841.6				4065.3							4235.52		4149.75				5217.79		6299.94
SRP14		1557.82																			888.176
STAT5A		12776.5			13110.8	13328.3			15271	12504.5		17119.2	18193.5			16301	17214.5				11274.1			12394.9					13828	12856.1	15410.2				16494.1	15084.1	11304.5
TMPRSS2		8941.92		7911.56				10181			8645.85																			10238.9	12173.6
TMSB10		10443.8		11720.9				12152.8		10149.5						4210.28					9469.44						11803.8		11473.5	10818.7	10923.4	12399.6
TPD52L2		2808.67	3035.06																3751.52	3438.67												2693.25			3523.25
TPM4		6753.94						7352.05	9322.35	7265.24	9321.14						10772.7							9878.25	0	11221.7						9433.14						10538.5
UGGT1		25159.7	49442.8		54762.8	28868	66539.3	24973			46018.2	85893.6		74772	58627	40231.5		64754.8	40464.5	49287.4	51244	26418.1	56306.8	80539	38523.6	68742.9		47409.1	51388.6	39924	73144.8	35651.7	75395.9	9892.63	37096.6	89202.6	71098.7
ALCAM			28418.4		38164.7					28955.1	19805.4	49868.2		51981.3	42008.9	48575	54013.2	44828.2	52867.4	33272.5	27061.4			41529.6				46141.7			39132.5	32185.9		48711.3			28514.4	43825.2
APOF			13889.8							16955.6						17919.4		16025.3	17842.3						15551.9					14961.1					16590.2		13914.3
ARG1			11385.7																		10132.6									9981.1							10543
BAG3			126278	128150					163189	125920														173669	189516										182371	152209		180374
BOC			0														29923.9								30105.1					21280.2					31377.5		20465.1
BSDC1			10247.5	9413.1		10055.6	11976.4	8381.29	11915		7864.08		14161.2	15402.4	12185	14715.4	12878.1	14211.9	13819.9		9405.82	9658.33	11138.5	12847.7	14110			12162.4	9330.7		12258.4		13657.9	15265.7	11026.2		7784.51	13502.2
C6orf132			8527.48							4386.2						6606.37						8168.26				11314.8			7980.41		5290.56
C8A			3470.63	2609.16					2802.11		2033.31			3106.61		3030.12	3237.37				1439.13	2449.19	2215.18						2228.47	1885.86					3288.42			2782
CCDC6			7196.27											13439.6							8412.98		8542.11											13009.7				10018.7
CD207			6494.99	8476.89	14492.4	6512.17	7371.6	11977.4		8185.15	7776.49			15781.9	11412.3			19846.5		10880.1	6083.76	5227.13	9941.83		12434.8	20695	9153.52				5949.26	14220.4	18309.3		12570.7			19666.1
CDSN			13918.1		14450		13662.3		15569.2		15007.7	16168.8	15885					15425.3			14509	13696.5	13702.3	15839.1	16658.5	16055.1	13430.5					14719.8	15186.5	18389.2	15975.3			15102
CFD			4320.2			3225.56	5244.6		3500.49	3419.46		2586.04	6781.28	5254.16	3331.33	4597.43		6607.36	3529.03	5163.61		3873.5	3880.13	5159.82	4831.03	5745.6	5624.33		2240.36	3574.95	1770.94	5993.82	5688.7	7396.48	4672.01			5101.43
CILP			18995				26878.1			21688.1	22884.8					34997.6									29759.8		20455.8	31381.9						34877.8				30934
CKAP5			8945.29
COL15A1			8735.52			10183.1	12689.8				6718.74	13181.1	13740.5	17843.8		15126.3			12206.3						13766.2	11455.7							13878.6	16394.2			8287.69	11110.3
COL20A1			27318.2																			22365
COL5A1			6815.92										10287.5				19028.3		13509.5						18207.9	13098.3		8390.57	9982.15		11428.1		15188.9	11313	11534		8992.18
CUL1			5751.77	6619.91	5759.6		7489.37	5537.98		5287							6915.37					6637.05		7015.36		6825.58		6065.03			7702.7		5430.98		7111.95		6427.27
DDT			29690.8			36582.7							48929.2					45150.3												30445.9				50618.3		41376.3
DOCK7			10647.9			11168.4			10269.8	10188.1											9064.32									7641.58		11328.1						14041.5
EPPK1			7231.93														7254.81							6834.33
FCGR3A			6895.69						10639.6		6716.68			12771.9				11635.9	9661.58	9342.1		2623		10720.4							8991.61				10105.5	10739.8		10036.6
FGFR2			7770.58	5983.11						8019.17	4835.16				9444.43	9654.99					7027.5				9815.03			9135.85	7896.64					10512.3			6164.37
FKBP2			9410.94		11146.4	11466.1	13384.8		14318.8		11028.3					13834.6		12763.3		11409.1	9526.75				13983.5	12897		13555.5		11156	11909	11662.7	13025.7		14028	12595.3		9505.35
GLIPR2			8285.47	8324.76	7794.36	7763.88					8891.14		10949.5	10504.7	9809.16	11535.5	8403.35	8939.21	9804.1	10479.6	6674.56		9082.75		8598.74			9516.88				7330.15				8719.9	7977.43
HP			3967.25
IGHV1-69-2			8368.31		12221.4		15286		10508.4	15986.9	13184.3	16253	13189.7	13822.4	11307.7	12625.7	16444.9	10522	16971	10553.3	14801.7	9702.21	15181.3		21993.3	12906.4		9769.94	13994.8	14383.3	19646.1	8443.69	19694.7	12681.8	15583.9	12399.7	8953.73	13337.1
IGHV3-72			15523.2	19849.4		19595	23638.9	19274.4		19004.8				29349.5	25005		23104.6		29626.2	20645.5	17964.5	20641.9			26396.3									27510.6
IGKV1-39			6717.6														15445.8	14702.9
IGKV3D-15			23897.5	24000.5	28267.3		29838			24061.6		37030.8	34325	37509.4	30278.8		35278.6	35479.2					26396.8		34295.1	36564.7	22217.9		24483.1	24195	29028.8		33002.3	35282.7	33145.8	31682.5	24196.2	34849.2
IGLC2			123600			157348			185631	127300		247570	266327	209892		239798	249063	229488	227259	147442	117665	134304	146385	214962	221817	184367	133230	159656			141723	146535			216217	173901		216860
MAP1B			18574					19061.5								30983.4				19885.6				26463.2														31741.1
MBP			82904	84004.5		97297.5	116823	77050.7	125166	88651.4	96527.5	155826	159800	173951	125043	163858	151473	0	146220	105885		84128.8	98854.6	131007	144812	156670		142465	82284.7	81480.9	114770	100550	107736	165639	145491	90676.7		139857
MLPH			17401.6	16071.1	16551.8				20173.7		18726	17561.7			18386.4	17429.3							16164.6	16607.8			15535.8		14813	11126.7	16442.9	15576.2	17532.5	18608.8
MSTO1			12057.7
MTMR7			8201.8	15906.9		15766.2					14466.5			22700.9			23329.3	21687.1	19225.8									20108.9				15847	22590.7				14705.5
NAA50			12356.3
NAGA			11983.6	13150.2	14298.7			12664.8					16360.7	17238.3			13306.6		13809.4					14265.3	16446.3	13858.6	15471.7	14074.7					14989.1	15735.5	14747.4	14037.8		10044.9
NPTX1			6769.59																								5975.59						2880.46
NQO2			3582.3
OBSL1			15289.8															42600.3
PHF6			15137.9		20229.2												25675.9
PLA2G7			7430.95								6957.5				7209.86															5783.49		7113.78					6142.7
PLCH1			25763.7								28401.4				33352.6					29651.9		26221.1		34943	28573.4			35625.7									25437.3	38578.9
PSME1			0	0	0	20726	0	0	8785.43	0	0	0	0	32077.2	0		19291	28304.1	0	41.2503	18439.2	0	38.8817	0	141.163	0		0	0			11.7524	0	0	0			5.77243
RAB3IL1			11474.9										31772.3																					23259
RHPN2			20026.3
RPAP3			10109.6		11919.6								15240.3	16586.9	13217.1	15489.8									14729.9					10313.1								14343.3
RPL26			14475.7								11359.7					28927.8	27075.7		25197.2									25702.5					27295.4
RRP7A			13277.2									15596.3	16479	19337.6		15723.1																			16703.4
RTN2			7581.49																		6887.02									7243.37
SHBG			1191.25															1804.34
TAB1			29460.8		36740.6	33197.1		29535.6		30621	34968.5	66368.6	71604.6		48833.2		61839.2	60707.3	58568.8	35461.7			35238.6	50855.7	56902.2	65143.2	32460.7	57320.6	29262.1	28737.9	44684.3	36585	54964.6	71182.6	60617.8	46611.5		58576.4
TMPPE			13200.7			15446.9				13830.6					17097.7		21059.8	20472.4						18994.5	18552.8	19311.4			15399.9	14328			19106.2					20250.4
TMSB4X			58282.4				72781.7											77292.3	82561.3	60146.6	59030.7				84049.1		60004.6		61939.8	54932.5
TNXB			10148.4	10824.6	11169.8	12206.5	13065.2	9734.29	8500.85		12184.6	12938		15145		8951.96	9137.68		13772.1	11647.8		7964.95	9080.75	13555.1			9002.47			10653.2		10384	13194	9773.55		9072.53	11552.9	11802.9
UMOD			30837.4	32108			42150.4		41580.6																					31406					49001		33184.6
VNN1			15107.9	13333	16378.6		13863.1			17561.8	18298.3				9192.69	17153.7		19308.3	15387.8		16675.9	13149.2	11659.2				10175.2			14726	8697.09	10653.8		14360.8			16650.8	12337.9
VPS35			11433.3	11478.5	12631.6	12509.3		9810.56		10939.4		32320.7			15288.9							11668.4					12273.3						18208.4				13226.2
WIPI2			52988																					85173.7
ACADSB				29651.7					37655.3										44194.4		28383.8		32108						26692	28459		23706.4					29705	39220
ADAMTSL4				1259.43	699.384						3379.58					4765.1																1515.49						1322.61
ADCY9				24943.2																																		26145.5
ALB				72676.8	82770.9	84257.7		69130.8		72708.4	82852.4									85512		75567.2	90259.4			149605	72822.2		77992.6	73044.8	100946	83696.2				109841	72204.2
ANXA13				1573.8																															1843.06
CA12				7670.67								12664	11749.5	8783.86		12663.8				9016.2		8548.61	9471.51				5265.9	8090.72							11308.9	10760.5
CNST				10883.8		11209.1		9689.53				12836.6		12303.1	11861	13467.3			12159.6
COLEC11				11655.1	18813.2			9705.51	24366.9							41183.1				18299.4		13297.1	9947.87					31486.2
FYB1				6809.47	5260.82	13148.1		6690.83								8945.36			12705.6			10871.4			16973.4			9226.69								15227.1
GLB1L				16962.2					17992.5		14358.1	22197.3				24882.5					15812.1		19439.7				18112.8			16293.9		18504.1					16439.9
GSR				10309.3	11107.1			11357.5		12398.9		10835	15150.8	15682.4	12012.4	13440.2				10358.5	13750.2	12232.8	11286.7	10971.9		11760.2	9147.92		13890.2	11116.2	11318.8			14016.7	11926			11993.2
H1-0				1597.18												2150.4			1874.14																			1508.28
HCLS1				11154.3								14006.2						14377.5			16088.9		11217.1			11595.6		18128.7					13784.8
HSPA4				1209.34
IGLV1-40				12735		12025.9	9929.1	9766.87			12482.8	15347.9	13583.5	13231.7		12022	10058.5				11436.9	12638.6		8718.03		8721.68	8851.36			9071.28			13034	13559.2	10743.8	7085.28	12870.9	11979.1
ITGA6				2638.44	4558.9											4910.83			5423.61														7021.43				2455.57
ITLN1				40781.9				39650.2					39670.2	67182.9					59326.3						53606.2	64861.8		57233.8						67664.3	59723.6			60282.1
KRT14				158412	189753		216141	156385					282279	296601	223045	292990	260208	263730														185968
LILRA1				10427.4											14434.5			14970.7		14066	11620				15305.3	16159.6				11720.3	15627.4	12365.9					12021.4
LYZ				6476.29						8823.38				3870.32			7407.39							5372.02			9016.65			9162.53				6112.84		5233.26
MED24				126096					184580	128096	157474	212273	221659	241153	181037		203120	208148	199000							219920		187796	121109			140472		211343	203642	168868	117563
MOV10				6830.84			4173.34	4456.25	8368.16			7230.2		9256.68	8244.1	6862.44		5199.06							9188.46	7627.88		8005.1				4091.3		8733.94		5615.18	6256.26	8116.34
MSL1				12740.1					20705.5	13812.4			22982.1	23212.3	20524.6			22431.6	18752.1	15647.7			17308.5		22714.9	21768.4		21365.2			17657.5	16732.3	14812.5	23135.5	23136.1	20534.7	14599.3
OLFML2B				8585.5	9299.33					9338.39				13044.2			12686.8			7220.99	9647.05		9154.04			9263.56	9317.88			9593.66	9097.44		11367		8776.48		7951.43
PIPSL				9794.5
PITPNA				3476.62								5526.22
PLEKHA4				8265.16		10045.7		8294.35	10785.8						14833								9410.95		14043.6			11239.8	12294.8								12651.5
PM20D1				3054.07								3908.97									4331.15	4787.73
PTBP1				53373.6		48350						57214.7			47814.7					39831.3		56114.2	51482.2						58474.6	56467.4			53371		59161.5	52409.7
SCG2				7797.89													13722.3																10281.8		10603
SDC4				4526.66	4956.87		4757.74						5423.02						4587.4				5101.2		5112.07			5054.98		4143.18		4644.77	5131.01		5135.29	15381.8
SH3BGRL				6123.17
SMPDL3B				12427.1
TAP2				8358.41										15378.4
UCHL3				11545.2
USP7				5871.28								8541.68								5185.56			5878.5			7161.75							6910.9
YWHAB				6308.23		8188.55									7334.31		8179.33			6900.69				8720.68		7712.84		6773.4	4499.06
CANX					5076.73
CHMP4A					8396.54						9044.32		13084.9		10045					10700.7								13258.8										10022.4
COL5A3					8379.14				9363.15		8114.06					9870.15	9985.37					7147.02		10578.7											9482.1
CTSF					17020																					22833.7								22502.9
ESD					5293.98				5920.12							7027.72	6886.95							6405.79		6649.24											4617.21
HADH					13610.9		10738.3																													12733
HDHD3					8521.98
HSPB1					48589.6							63031.6												61142.5
ITIH4					8559.7		9253.43		9054.5					11511.8											11879.7	13674.2		11453.8					8359.92	12672	10856.5
LGMN					0	12003.2		13067							16905.1							14136.2			17158.9		12771.6						16513.8
MYEF2					16061.3		27690.9								26249.6							14980.4	21983.6					30090.4
NAXE					7772.38
PLTP					2210.97								1911.49					2231.17	2360.08						2509.21								1548.1		1778.88	2173.93
PPBP					5423.37		7047.2	5671.31	8153.4	4111.96	6073.65		6209.92	7876.37		7188.39	6486.51	7375.31	6930.2	6697.29			6338.07		7944.48	6838.65		7392.35	5960.29	6305.44	6482.52	3802.75	7052.18	7502.76	7537.8	7847.72	5255.82	8107.6
PPP1R10					5922.1																										6776		6984.83
REG1B					8152.55	8774.3								8690.01					10470.6		7751.66										9690.99				9534.95
RPS8					10505.1									21763						20222.5	9173.33				11714.9		8928.72		13460.2		19855.1			23447.6
SECTM1					16070.7				17051.8											15728.6		13644.8			17236.8									18045.5	19622
SLC2A1					30948.7	26208.2		19136.6	29954.4	23821.2		43379.4	39473.4	43271.3	34931.7	9231.11		39213.5					27080.5	28715.3	32232.7	35014.4		36870.5			30348.3	27709.7			38295.3		20617.4	11613.2
SNX6					4994.16										9601.64													8148.53										12271
STK4					6258.23
TXNL4A					7589.15
B3GNT2						6396.09				5109.26		7948.78																7355.39
CAD						26383.2		28722.4							36060.6			37041.1			29597.9	29734.2		35028.6		40540.6			28623.8		32576.1	28610.8					28303.1
CAPS						5749.3																5048.81				7896.49		7755.96
CTBS						8526.76																10858.6															11291.6
DPYSL4						22567.1
GALNT7						26726										65257.9													26163.2
H1-5						6127.37						7791.61	8038.83	7147.59		7633.8	7846.27		8691.46	6516.01												6407.44	7637.72			7472.98
IAH1						2362.87	3873.69				3160.6		6092.1		6710.03												2217.79		2079.52	2174.66						4351.82
IGKV1D-16						13690.2	18478.7				12614.1								18379.8																15078.7			11573.8
ITPK1						19654.6
KHNYN						12268.9	8361.32			6608.17		15097.4	7158			11797.7	14917.7			4955													7217.64	15499.4			10909.6
KLK6						2717.03
LILRA3						4654.07
MAPK1						18817.3	18162.8	16010.5	21853.5			15802.4			18128.1	19382.3		16009.4		16557.4					18144						19119.4			23455.6		13968.1
NUP133						5259.15		5898.82				12011.1	10483.3														7233.88		7190.72				7608.38	12055.1	8042.5			12562.9
PLXNB2						9090.55
PML						239137	277500																															306276
POFUT2						7466.5				16733.2						10453																	27064	28190.4
POMGNT1						21126.5		17575
PPIB						7566.96																			9127		6251.9				8028.03
PRKCD						12697.9																						16540.4
PTPRZ1						9274.19				8456.28		13798.3				10420.8		13319.8		9217.55		8584.07	10945.8	13645.8							8548.32	9208.93		12934.9		11170.5
PTX3						28460.6			31606.9																56890.9						70132.4				74518.8
PXN						9549.86	10751.4																		9989.57
SDCBP						12686																					12232.7
SEMA4B						3443.82		4715.82					6339.03	7209.92										9087.12	5674.41								5836.13		7062.66			9631.53
SLC3A2						9050.04
SNX29						16714.8
TARSL2						19186																	20410.8								20609.5
TXN2						18840.1
UQCRFS1P1						22634.3
USF1						15386.4			14291.7												11384.7			13704.5								10419.6					14442.4
AASS							7863.09										16517.1		12901.2							13403.2			9492.95			7755.13		13884.2				12805.7
ABCF2							7730.8	10755.2											12399
AIP							74790.8																													70603.5		83097.9
AK1							2948.65	3442.52															3006.31		1767.03		1082.89				2441.53			1794.44
AMY2A							24426.1											29879.8														26477.1
CAPN14							12417																			13680.6						10065.4				12410.2		14798.3
F11							4869.28																	4950.19											4126.37
FAM162A							19199.4	14528.8																22223.6				21394.9	14872				21679.7		21338.2
FBXW9							15275.3																													12467.3
GP1BA							8128.46
HPD							17063.7				13001.4	10919.1			9977.6						14975.6				11805.4		10862.5	9851.61										11578
ICAM1							11878.6	6552.48	6974.88					8060.76	11015						6985.66				12486.4		6767.49										8769.63	11386
ITGAM							8770.31
KIF23							23283.9																19170.6												21145.7		12458.3
MYO1F							13099.2								21151.8												14368.8
NTMT1							33437.3
PAICS							5042.79								10285.7		9323.79		12807	11782			11763.3			17785.1	10517.1						10134.3				10646.3
PTPRN							34807.7			27904.2																							37508.9
RPP30							16655.6								14925			17981						16482.9							8470.84
STC1							25682.4
TF							10055.9													8020.19				9091.92				9519.95				7738.79			8558.69
TFRC							1714.19							1831.19		1267.47		1573.6						1381.19										2082.96				1974.33
TLE3							7232.74							7885.83
VASP							2535.25									2667.82
WDR7							28368.4			25013.1	24610	33214.5	40554		33203.2		36505.2		38347.8				20610.7	29560.3				35497.9				20680.8	37980.2		36961.3	33251.8		36533.3
AGT								1771.55	2455.12		1905.94			2833.36		3148.58	2515.55	2247	2350.6						2384.02	3358.08	2138.38	2814.58			2159.49			2502.96	2213.98	709.822		1018.64
APLP2								13862.5						8672.48
CA2								7165.88					10633.2
DCN								9790.63		6660.23	6537.86						12089.3											11209						8788.98	5397.89
DLGAP2								13204.4																17217.6
EMILIN2								4854.63
FAM20A								3032.6									9880.6
GLUL								6290.86						6592.08
GNPTG								8733.16												7009.1													7266.92
GP2								4070.01																											4850.62
GPC1								11873.1							12278.8												10978.8					14588.8	16224.3
IGLV2-18								2357.52								2741.47		3330.06		2773.3	2792.24								2567.99	2827.52		2927.34
JAK3								15345.8																						15292.6
KLK3								6626.39			26796.9
KRT72								25501.9														24154.1															25893
LPCAT4								7582.22			9483.4														13808.2				8910.95			10240					9182.4
MOGS								11071		11062.4			19767.9			15784.8								14921.5		19238.4										15287.2
MSR1								8190.44					4918.97				3119.05
PADI2								1111480					2142800
PARP4								10122.9			14236.8								15961.4														18289.4					14852.1
PAXIP1								13581.4	16528.2											13657	10131.6						13299.2											17568.5
PEBP4								373.413						1834																								1695
PNPT1								15071													16598.3
S100A7								19550.9			25792.1															11679.3		33040.2
SDCBP2								22835.6					43558.9					40966.3			24243.3		27496.8					41802.2		23334.6		26940.6
SDR9C7								17537.3						30862																	22030.2
STOM								16420.5																					16967.8
TPM2								12132.9														27564.3
B3GALT6									33119.2											28404.7					33557.4			30463.9		22351.5				31559.1
CRISPLD2									65228.8																	57274.9		71704.7		52489.5				46290.2	0	47006.8
DECR1									6566.63								6363.21									7330.8
DYSF									34317.9				36566																									32954.3
FAM83G									64697.2					104021	69838.2			82979.7																	78115.5
FOCAD									9629.57			10233.4		11299.5															6687.12	0
GBP1									11257.5		8557																										8639.91
HK1									16817.8	11365.2		20705.6	18773.1			19830.8			16971.7															21683.7	19636.1
ICOSLG									2359.64				3087.76													3059.76						1552.46
IGLV5-45									4812.48	4063.46	2031.45	5685.13		5721.97		5249.4		5125.46	3838.8		3043.35	3540.53	3639.51	3425.09		4758.78	2889.29	4704.37	3703.22			3287.08	4975.2		5492.38			4990.76
IKZF3									31832.1																													46566.6
KRT18									44452									59186.9
NFYA									9824.57	7951.06			13929.6					12586	12159.4	9213.73	7758.61									7732.69				13408.2	11284.5	10018.7
ROCK2									13462.9
SPARC									4956.39								4280.9																	4399.76
TTC28									22944.6
YARS									10614.5															11562.4					9259.49
AHCY										12996						14792.9						11180.6					8452.41		13026.7			14210.8					19034
BMPER										237677					304029				325349												290969	252864				367353
CBX5										5219.41				6588.12						5873.07		4792.46	4783.07		5851.34		4872.54	6822.34					6023.82	6395.04			4782.78
CLUH										7683.8													12996.1			13302.3
CTRB1										14074.3												21466.5							18994.4				24633				21197.9
FABP1										2219.32
FLNC										5070.02
GNS										4140.35	10492.3				12882.8						9098.69			5917.17							4840.24	14385.2	21532	23792.1
IGF1R										16271.2
IGHV6-1										9888.49																9996.99	8001.18						9603.94		9276.37
LAIR1										16518.1												16410.2
MARK1										29815.5
MTMR2										124809	142439				189734																				218116
MYL6										13061.6
PLXDC2										8604.75											9430.88
RBBP7										7567.22					12152.6	15943.9											6246.23				11573.9		6670.75		13449.5
TRBC1										8399.48											7954.57
U2AF2										15217.5
UBQLN1										9297.1																				9689.06						11347.2	10554.3	10439
ACE											6427.61
AKR1A1											413650	36520.7				39076.2	36114																		36533.1
ANXA6											19303.1	33911.6	33061.2	36366.5				31391.6											20885.9					35359.3
FABP3											290945
GALT											7387.71											14972.4		12170.8		8564.53						15616.8				10503.4
KRT6A											14934.7										13652.4
PCYOX1											40394.7												114959			70658.8					51346.4		177616
PEPD											7534.44							8805.08	9233.74									11673.2							9365.17			8358.9
PPIA											129141
RAB31											22650								29770.1		21238.9	20047.6							19747.9								19059.2
RPL7A											13679.9																					16262.1
SHH											2294.01
UBE2I											5191.67
VGF											16044.7				20008.5				21280.3	18636.8									17039.8						19256.7	17794.7
ASCC2												44439.5			39950.2					29818.4																		43194.3
ATP5PF												2990.37										3263.96						4073.84					3971.5				3461.63
ATRN												3700.85		3624.11			5656.63	4357.49		2760.64						6733.73						2770.7	5781.5
C1R												16602.7												11523.8								12824.8	11182.7	17406.2		16189.2
CDH6												36776.9																		26786
CGREF1												3585.75		4391.46
CUEDC2												11378.1				13053.3						6735.64
DDI1												21105.9																										13040.8
DGKK												10942
ERCC6L2												32954.6
GYG1												37377.1													36148.8
HABP2												4013.89														5849.5
HAL												11416		11529.9			17109.2			12964.4					9321.16							8122.16						16248.5
HSPA8												10897.5																			11615.1
IDO1												8215.67
IGHV2-26												43328.5									20072.2		22401.3
NPHS1												10366.5														9653.83
PITHD1												9601.87							7635.09									8951.46			7437.62
RAD23A												19071.6												2698.65							2633.73							2470.01
RASAL1												8690.52							8373.69
SLC23A1												15511.4		23039			18974.9	20535.1					13567.7								11048.1					14621.1	9929.52
TGFBI												2757.24				4695.18		5039.97	3191.82						3817.28	3493.76		3817.45					3986.85
TTC19												10759.9
ZFR												11407.8											10292.9					10987.2				9144.34
AGRN													61666.8
ANXA3													12197.4
APOC4													4270.49		3462.3
ARHGEF6													1416530
BCKDHB													10447.4			11656.5		11454.4																	10469.2
BMPR1A													16552.8	19183													10774.2							19039.2
CFHR5													53728.3			51011.8	14771.9				10716.8	38871					63494.9							67250			11786.9
DAXX													12912.2																					14507.4
DNTTIP1													71931.7																					73645
EEF1A2													7720.9			7944.57
EXTL2													9883.77	9858.62				9428.03													10171.8
GBE1													8455.66				9021.58														6011.14
GPX2													10010.3																								10502.7
MAN2A2													273847
MYO1A													13715.3				11509.9	11953.7	11120.2							12104								13821.6
NAPA													28973.5																							25905.6	21493.5
PDCD10													115013																								68750.3
PEA15													13366.2
PGM1													28185.2						35468.1														20571.4		26766.9			23988.3
PRKAR2A													18653.5			13743.7
SIN3A													12743.5												10626.4
SIRPA													3074.83
SSRP1													10613.6
ATP6V0A1														42809.8							23322.8	21867.1				34411.7					31840.1
B2M														3866.46
CAPN2														2037170
COL4A6														12983.1
DBI														1667.12				1661.4			1707.34				2188.88								2110.69			1633.07
DHX30														35264.4
FGA														0				779.638																765.376
FKBP1A														17855.9											14695.9											18179.6
HCK														13149.2	11390.8										9044.88
HOOK2														18458.9						12809.7
MRTO4														20232.1
NAA15														70504.5
NFASC														41561.8	41566.5															23920						37906.1
PPP1CA														3899.81					3468.13
PTMA														366822
S100A9														0			14345.3										0	15690
SERPINI2														17540.7
ASAP1															11417																							10527
ATP6AP1															8461.62
CPNE5															7008.55
DDI2															24775									21380.6
DDX60															10869.1
IGLV2-8															10071.1												8593.86						10828.3
KCNAB2															3179.29
LSAMP															9014.71													11213.3						11433				10550.2
MYO1D															36248.1
PCSK2															25147.1						23322.2																18123.3
PRELP															1310.53
PSMA3															7340.78		36856						21971.2	33631.3						25970.2			8687.95
RTL1															19754.3													22848.7
S100A12															6376.46
SNRNP40															6504.73
TAGLN2															5009.03						3033.54	2463.24															3864.49
TCOF1															36035.9			41338.2	34054.4						38977.4			40118.3				27032.4		47053.4	42068.5	32763.4		39986.9
TPI1															26839.6															21559.8			27083.2
USP34															1510410
VSIG1															63895.9
ZNF512B															7515.03
CCL14																25378.5								25202.9
COLEC10																5865.13																						7362.25
ECM2																19173.2			19499.4									12841.1			18905.7		17563.4
FDFT1																46683.8
FGD2																14379.1
GRK5																53164.1
HSP90B1																13633.6																		17330.9
LEFTY1																26130.3		22349.9		16646		15609.8
MAP1A																26532.3
NAPSA																9565.15												8913.83								7131.45
PDIA3																2979100	2662140						1950550			2326090				2021140							2164500
PGK1																6611.1
PTPRD																0	0									8679.17
RABGEF1																25942.3
VDAC1																9511.96
ARHGEF10L																	17353.1								15572
CDC42EP4																	12547.6
CTH																	22018.9	24193.3
DNASE2																	5957.61
FOXO1																	18409.6												12508.8								12607.2
GUCA2B																	10802.1
IRF2BPL																	15092.9
KRT3																	81064.1						57578.6
MPO																	11355	9613.61					8832.71	10048.8								4839.28
NFIA																	13229.8
NPTXR																	3109.93
RPN2																	35658.7
SAR1A																	77098.5																			67991.7
TMEM159																	11732.6
UBR7																	10378.4
VAT1L																	51234.8							57749
AEBP1																		10880
BOP1																		312999	293259				210269						162493								167449
CDH5																		15778.7								15442.9						14881
GIGYF1																		23467.7						21591.7					17432.6			17901.4				19503.3		20169.9
IMPDH2																		22729																23988.8
KRT5																		2589.76
NUDT5																		7234.07
PFN2																		16614.5	15352.1			12821.8									15040				16826.7
QDPR																		18964.9		12839.6	12659.6				15635.5				12013.7						14715
RCC1																		39165.2							26222.1						31890.5		42598.4
RPL32																		10614.8
THUMPD1																		9192.12																				9441.63
ZCRB1																		6974.33															6799.85
ALDOB																			13126.3								11352.7
ARPC4																			40408.2
CASP6																			13571.5
CDHR2																			6886.79
CKB																			20275.8				16698.8						15678.3							18141.7		19239.6
CYP4A11																			15541.9
FCN3																			3043.23
H2AFV																			33076.4
IGLV3-27																			4457.32			2865.18													3711.65
MMRN2																			13494				12498.2														12102.3
PAM																			8624.39
VNN2																			5129.67
FKBP5																				13454.8																	14388.8
GSTO1																				25008
LBP																				1995.76
LDHB																				43233.8																	5257.34
MFN1																				12031.8			0							9782.2
SYTL2																				16671.4
ALDH7A1																					4981.31
CAP1																					7932.29
DDX23																					70096.6
DDX3Y																					11831.7
GCLM																					3067																	6717.99
IGKV1-16																					6259.68															9249.27
LIMA1																					14463.1
PGAM1																					6631.18
TEK																					6603.63
MYH11																						6608.13
NUDT16L1																						13729.9
PVR																						5530.66
RAB34																						15170							13390.1
RTN4RL2																						21628.6						37226.9
SACM1L																						5896.85					8366.84
SLC3A1																						2626.84
SPRYD4																						11134.5
YWHAZ																						4069.31				6347.98
CLPB																							10981.2
EIF3A																							1519.17
LSM8																							12261.1									11968.4
NDUFV1																							10192
PPHLN1																							13890.2
RAB4A																							3100.37
SMAD4																							22202.8			27141.8										16410.1
SYNPO2																							24475.4								29021.6
CHD1																								22880.5							21711.9
GPC4																								26539.1
MARK2																								10028.3		7298.92
PPT1																								8431.98
SESN3																								98028.2
ARHGEF17																									18564.1
ARID1A																									36337.2
ATP5F1A																									9117.93
ATP6AP2																									17578.2
CCS																									6121.74
DAG1																									4758
EPRS																									3391.9
FBXO6																									32042.6								30220
HSD17B4																									28229
LRRN4																									32853.5					19778.1
LTB4R																									4794.22					4736.7
MRC2																									6738.3		1948.6
RAB25																									19874
TBC1D2B																									6861.93								7338.36		6073.92
C1QBP																										28628.4
DBNL																										5502.93
DNAJA1																										3273.19
FCGBP																										5661.68
PPP2R5E																										14136.9		12883.9
RPS25																										5059010
SEC61B																										48524.8
SKP1																										4834.19
URB2																										44368.1
YBX2																										23077.9
ATP2B4																											23020.4
ELP1																											4494.44				4512.52
NADK																											3646.6				4499.17			3779
PTK7																											5865.97							7413.2
SMC3																											11145.7
ADGRG6																												33551.3
FAM118A																												1063040
HSPB7																												10751.6							9657.39
MDH2																												20442.8
PVALB																												15655.9										14847.8
EXOC5																													28489.1						48085.9
NCF1																													461933
PILRA																													18120.3
STK11IP																													17460.6
CMTM5																														10591.9			7171.1
H1-1																														61547.3
HSPH1																														13462.3
LARS																														50991.7
ODF2																														17367
PARK7																														11332.2	36672.4
RAB11A																														9122.02			10746.8
SLK																														169439
WDR82																														13743.7				17424.4
AP1S2																															3573.98
ARHGAP1																															5661.99
CA1																															1578.81			2744.15
RPA3																															16605.8
RPH3A																															18137.8
TPM3																															8260.87
ACP1																																13211.1
ADH1B																																13393.7
CAST																																4509.19
EPS8																																57231.4					53886.4
G6PD																																8763.93
KEL																																9854.5	11629.3		13026.3
LGI4																																8227.72
MAP7																																101736
MZB1																																12057.6
PIGR																																4209.2
PIK3R2																																20936.1					18959.8
POTEE																																4053.3
RPS2																																1625.82
SEPTIN5																																12400.8					11880.9
SPTB																																12835.2
ATXN2L																																	188866		189181
AVL9																																	9906.78					9314.09
CHI3L1																																	11268.2
CROCC																																	34870.1
MTPAP																																	16717.6
PSMD8																																	7577.25
RASIP1																																	14074.4
BOLA2																																		18380.3
CCAR2																																		10045.6
HINT1																																		9666.42
MOGAT2																																		2953.59			2761.63
ROBO4																																		6516.29	6057.89
SEPTIN2																																		26053.6
TAF6L																																		11161.5
TNFAIP8L3																																		13703.2
ARFGEF1																																			20594.8
ATP1B3																																			10110		6114.57
DHX32																																			44204.8
IL1RN																																			10577.3
TBL1XR1																																			24217
TOLLIP																																			46000.7
ITGAE																																				20487.1
LGALS3																																				28991.5		17338.7
RTN1																																				70809.9
CD99																																					7536.77
STAG2																																					12962.9
UBAC1																																					9570.03
JAKMIP2																																						22738.8
MSH3																																						9373.81
NT5E																																						184893
OXCT1																																						121503
PROCR																																						3771.25
RNASE4																																						5623.07
SLC27A3																																						7986.23
SNX27																																						11378
TUBB2A																																						1912.25

## Sheet: 3.Spearman_Cor_QC_Rawdata
	tQC_NA_NA_104	tQC_NA_NA_114	tQC_NA_NA_12	tQC_NA_NA_124	tQC_NA_NA_134	tQC_NA_NA_144	tQC_NA_NA_155	tQC_NA_NA_165	tQC_NA_NA_175	tQC_NA_NA_185	tQC_NA_NA_195	tQC_NA_NA_2	tQC_NA_NA_206	tQC_NA_NA_216	tQC_NA_NA_22	tQC_NA_NA_226	tQC_NA_NA_236	tQC_NA_NA_246	tQC_NA_NA_257	tQC_NA_NA_267	tQC_NA_NA_277	tQC_NA_NA_287	tQC_NA_NA_297	tQC_NA_NA_308	tQC_NA_NA_318	tQC_NA_NA_32	tQC_NA_NA_328	tQC_NA_NA_338	tQC_NA_NA_348	tQC_NA_NA_359	tQC_NA_NA_369	tQC_NA_NA_379	tQC_NA_NA_389	tQC_NA_NA_42	tQC_NA_NA_53	tQC_NA_NA_63	tQC_NA_NA_73	tQC_NA_NA_83	tQC_NA_NA_93
tQC_NA_NA_104	1	0.929225	0.913675	0.92969	0.928295	0.929614	0.924794	0.922696	0.927366	0.936746	0.926373	0.89921	0.922778	0.919743	0.928671	0.926673	0.894155	0.930368	0.907521	0.920387	0.91617	0.908523	0.930324	0.898355	0.907598	0.936003	0.910941	0.905984	0.898219	0.903461	0.891381	0.908497	0.904673	0.918141	0.930026	0.920766	0.928716	0.931416	0.928737
tQC_NA_NA_114	0.929225	1	0.903194	0.937237	0.942854	0.934297	0.92164	0.909824	0.91932	0.918515	0.940707	0.898599	0.926275	0.925451	0.909297	0.934808	0.916289	0.91841	0.916339	0.930249	0.927764	0.908812	0.913686	0.914241	0.902542	0.927817	0.912558	0.914695	0.898293	0.89275	0.891626	0.906657	0.887928	0.900919	0.917274	0.945142	0.905732	0.910947	0.93146
tQC_NA_NA_12	0.913675	0.903194	1	0.910565	0.905958	0.924608	0.884643	0.881878	0.898881	0.895701	0.888649	0.91991	0.898799	0.881908	0.927598	0.88352	0.886353	0.899901	0.878453	0.875909	0.851445	0.857904	0.855341	0.866505	0.845993	0.940267	0.867645	0.85668	0.836419	0.843647	0.836593	0.835774	0.865547	0.941417	0.915369	0.938705	0.932363	0.903494	0.92657
tQC_NA_NA_124	0.92969	0.937237	0.910565	1	0.907162	0.936207	0.919544	0.901963	0.908262	0.913889	0.921121	0.891982	0.94005	0.908437	0.909695	0.934751	0.905867	0.924602	0.921106	0.927869	0.913909	0.923334	0.908985	0.908097	0.915013	0.933792	0.930723	0.909066	0.896589	0.905806	0.88763	0.901251	0.903761	0.911903	0.914866	0.940153	0.894557	0.913819	0.930272
tQC_NA_NA_134	0.928295	0.942854	0.905958	0.907162	1	0.934739	0.91548	0.91021	0.912765	0.929454	0.931234	0.910514	0.901049	0.923703	0.926829	0.91073	0.917663	0.913964	0.909729	0.907346	0.90064	0.900057	0.907656	0.90097	0.882419	0.932174	0.893572	0.900352	0.891406	0.861283	0.853862	0.883972	0.887185	0.913563	0.941119	0.919065	0.915864	0.915438	0.929715
tQC_NA_NA_144	0.929614	0.934297	0.924608	0.936207	0.934739	1	0.906211	0.913817	0.925212	0.938523	0.923796	0.917612	0.928938	0.922747	0.924324	0.907709	0.91546	0.927799	0.918749	0.934795	0.905971	0.907305	0.906915	0.907665	0.909292	0.940477	0.911685	0.924908	0.894863	0.898283	0.893283	0.897102	0.89746	0.932719	0.940814	0.941192	0.911642	0.920352	0.947591
tQC_NA_NA_155	0.924794	0.92164	0.884643	0.919544	0.91548	0.906211	1	0.923508	0.928843	0.909363	0.930085	0.859913	0.90507	0.897026	0.88701	0.90873	0.920449	0.913767	0.899206	0.919575	0.910472	0.922629	0.928038	0.882877	0.890895	0.890354	0.902866	0.914037	0.893637	0.894396	0.879383	0.904665	0.920561	0.887916	0.919142	0.902149	0.905095	0.921866	0.917271
tQC_NA_NA_165	0.922696	0.909824	0.881878	0.901963	0.91021	0.913817	0.923508	1	0.943189	0.916301	0.915061	0.87818	0.914068	0.925029	0.896554	0.912787	0.8923	0.924103	0.88657	0.910313	0.923875	0.938125	0.908806	0.896147	0.902694	0.923069	0.90697	0.908805	0.893847	0.900836	0.903332	0.911706	0.903321	0.871188	0.914287	0.910935	0.900854	0.917347	0.899488
tQC_NA_NA_175	0.927366	0.91932	0.898881	0.908262	0.912765	0.925212	0.928843	0.943189	1	0.91781	0.922707	0.866389	0.921297	0.918816	0.88973	0.921354	0.923188	0.9261	0.921844	0.914669	0.915713	0.942775	0.926396	0.900573	0.91395	0.902771	0.913162	0.92447	0.907726	0.903082	0.886005	0.912766	0.921715	0.896612	0.920702	0.90856	0.913458	0.923836	0.91673
tQC_NA_NA_185	0.936746	0.918515	0.895701	0.913889	0.929454	0.938523	0.909363	0.916301	0.91781	1	0.933937	0.882331	0.912023	0.908555	0.89708	0.925407	0.908934	0.938058	0.917111	0.91646	0.926406	0.904798	0.923399	0.906533	0.883069	0.923962	0.914834	0.92574	0.881566	0.92036	0.882882	0.891739	0.912967	0.890407	0.915037	0.907915	0.905826	0.90154	0.930356
tQC_NA_NA_195	0.926373	0.940707	0.888649	0.921121	0.931234	0.923796	0.930085	0.915061	0.922707	0.933937	1	0.865305	0.929989	0.924963	0.886768	0.932182	0.937682	0.942	0.925785	0.926103	0.922347	0.92877	0.931983	0.922585	0.911475	0.907568	0.927222	0.910015	0.908299	0.917188	0.905303	0.925236	0.924434	0.902497	0.920403	0.929804	0.889247	0.913012	0.938782
tQC_NA_NA_2	0.89921	0.898599	0.91991	0.891982	0.910514	0.917612	0.859913	0.87818	0.866389	0.882331	0.865305	1	0.865757	0.881702	0.934182	0.853471	0.861756	0.876144	0.877388	0.874235	0.851316	0.848008	0.852189	0.841052	0.840208	0.941097	0.849365	0.843051	0.841445	0.824447	0.803562	0.814382	0.841192	0.919826	0.934916	0.909625	0.896153	0.891591	0.888258
tQC_NA_NA_206	0.922778	0.926275	0.898799	0.94005	0.901049	0.928938	0.90507	0.914068	0.921297	0.912023	0.929989	0.865757	1	0.926389	0.888063	0.93352	0.91836	0.940953	0.932005	0.945507	0.922868	0.926139	0.907901	0.940815	0.938209	0.913082	0.913453	0.920967	0.935776	0.933459	0.922411	0.934632	0.917393	0.907174	0.887041	0.932412	0.890323	0.894924	0.914966
tQC_NA_NA_216	0.919743	0.925451	0.881908	0.908437	0.923703	0.922747	0.897026	0.925029	0.918816	0.908555	0.924963	0.881702	0.926389	1	0.890158	0.916241	0.911854	0.945037	0.931898	0.926721	0.925395	0.924321	0.919161	0.93254	0.914937	0.911496	0.946749	0.920284	0.927874	0.917897	0.896219	0.905182	0.923942	0.889349	0.917813	0.916172	0.883814	0.900124	0.909348
tQC_NA_NA_22	0.928671	0.909297	0.927598	0.909695	0.926829	0.924324	0.88701	0.896554	0.88973	0.89708	0.886768	0.934182	0.888063	0.890158	1	0.873591	0.855439	0.88639	0.865988	0.878768	0.87234	0.878212	0.866604	0.862683	0.851148	0.935507	0.855696	0.86642	0.841281	0.850624	0.837617	0.841281	0.858233	0.921873	0.933564	0.935692	0.90401	0.912944	0.91567
tQC_NA_NA_226	0.926673	0.934808	0.88352	0.934751	0.91073	0.907709	0.90873	0.912787	0.921354	0.925407	0.932182	0.853471	0.93352	0.916241	0.873591	1	0.946226	0.944106	0.935947	0.933445	0.937057	0.93805	0.933636	0.935729	0.918889	0.887425	0.941592	0.925898	0.929532	0.92222	0.913748	0.930053	0.926092	0.886613	0.899151	0.91709	0.88503	0.894655	0.922064
tQC_NA_NA_236	0.894155	0.916289	0.886353	0.905867	0.917663	0.91546	0.920449	0.8923	0.923188	0.908934	0.937682	0.861756	0.91836	0.911854	0.855439	0.946226	1	0.954027	0.934301	0.926225	0.920534	0.923154	0.93568	0.923472	0.910358	0.896051	0.913373	0.908182	0.910525	0.909865	0.881342	0.926183	0.920761	0.918035	0.89791	0.89674	0.894061	0.909935	0.92632
tQC_NA_NA_246	0.930368	0.91841	0.899901	0.924602	0.913964	0.927799	0.913767	0.924103	0.9261	0.938058	0.942	0.876144	0.940953	0.945037	0.88639	0.944106	0.954027	1	0.947604	0.932478	0.927433	0.947002	0.939232	0.923533	0.923128	0.91923	0.91904	0.924232	0.929814	0.933643	0.916484	0.935632	0.927209	0.90491	0.918578	0.923003	0.891645	0.906482	0.937011
tQC_NA_NA_257	0.907521	0.916339	0.878453	0.921106	0.909729	0.918749	0.899206	0.88657	0.921844	0.917111	0.925785	0.877388	0.932005	0.931898	0.865988	0.935947	0.934301	0.947604	1	0.922438	0.924151	0.918444	0.921007	0.920247	0.915568	0.897779	0.922184	0.930224	0.915043	0.922277	0.881294	0.918501	0.926809	0.897634	0.914894	0.902306	0.870972	0.867008	0.916244
tQC_NA_NA_267	0.920387	0.930249	0.875909	0.927869	0.907346	0.934795	0.919575	0.910313	0.914669	0.91646	0.926103	0.874235	0.945507	0.926721	0.878768	0.933445	0.926225	0.932478	0.922438	1	0.926047	0.929128	0.937747	0.924336	0.940005	0.900193	0.919604	0.927387	0.918052	0.925644	0.908357	0.915572	0.919345	0.906901	0.903583	0.907678	0.874642	0.892373	0.911301
tQC_NA_NA_277	0.91617	0.927764	0.851445	0.913909	0.90064	0.905971	0.910472	0.923875	0.915713	0.926406	0.922347	0.851316	0.922868	0.925395	0.87234	0.937057	0.920534	0.927433	0.924151	0.926047	1	0.945844	0.939981	0.913407	0.913059	0.890981	0.927439	0.933444	0.919	0.932458	0.90419	0.931691	0.914508	0.864279	0.893662	0.906297	0.878967	0.896876	0.903345
tQC_NA_NA_287	0.908523	0.908812	0.857904	0.923334	0.900057	0.907305	0.922629	0.938125	0.942775	0.904798	0.92877	0.848008	0.926139	0.924321	0.878212	0.93805	0.923154	0.947002	0.918444	0.929128	0.945844	1	0.945527	0.923381	0.933717	0.895634	0.930329	0.932297	0.93247	0.939834	0.925906	0.943845	0.938641	0.875644	0.910161	0.89396	0.892355	0.909762	0.905038
tQC_NA_NA_297	0.930324	0.913686	0.855341	0.908985	0.907656	0.906915	0.928038	0.908806	0.926396	0.923399	0.931983	0.852189	0.907901	0.919161	0.866604	0.933636	0.93568	0.939232	0.921007	0.937747	0.939981	0.945527	1	0.918611	0.922624	0.868591	0.927387	0.930637	0.926218	0.927395	0.910533	0.940221	0.941141	0.895863	0.901928	0.884498	0.886001	0.896567	0.912074
tQC_NA_NA_308	0.898355	0.914241	0.866505	0.908097	0.90097	0.907665	0.882877	0.896147	0.900573	0.906533	0.922585	0.841052	0.940815	0.93254	0.862683	0.935729	0.923472	0.923533	0.920247	0.924336	0.913407	0.923381	0.918611	1	0.932753	0.880358	0.928374	0.915947	0.926365	0.912357	0.916172	0.928228	0.903206	0.907023	0.87863	0.893303	0.859542	0.884461	0.910169
tQC_NA_NA_318	0.907598	0.902542	0.845993	0.915013	0.882419	0.909292	0.890895	0.902694	0.91395	0.883069	0.911475	0.840208	0.938209	0.914937	0.851148	0.918889	0.910358	0.923128	0.915568	0.940005	0.913059	0.933717	0.922624	0.932753	1	0.883383	0.93548	0.941874	0.938496	0.925334	0.930925	0.941335	0.917251	0.88943	0.875634	0.88238	0.844143	0.865054	0.90041
tQC_NA_NA_32	0.936003	0.927817	0.940267	0.933792	0.932174	0.940477	0.890354	0.923069	0.902771	0.923962	0.907568	0.941097	0.913082	0.911496	0.935507	0.887425	0.896051	0.91923	0.897779	0.900193	0.890981	0.895634	0.868591	0.880358	0.883383	1	0.899565	0.893247	0.871971	0.870914	0.881109	0.870299	0.876378	0.939568	0.93452	0.942874	0.922689	0.9149	0.936417
tQC_NA_NA_328	0.910941	0.912558	0.867645	0.930723	0.893572	0.911685	0.902866	0.90697	0.913162	0.914834	0.927222	0.849365	0.913453	0.946749	0.855696	0.941592	0.913373	0.91904	0.922184	0.919604	0.927439	0.930329	0.927387	0.928374	0.93548	0.899565	1	0.929548	0.927186	0.928222	0.916186	0.931131	0.930993	0.888516	0.893955	0.894782	0.878354	0.880647	0.892402
tQC_NA_NA_338	0.905984	0.914695	0.85668	0.909066	0.900352	0.924908	0.914037	0.908805	0.92447	0.92574	0.910015	0.843051	0.920967	0.920284	0.86642	0.925898	0.908182	0.924232	0.930224	0.927387	0.933444	0.932297	0.930637	0.915947	0.941874	0.893247	0.929548	1	0.933263	0.92204	0.906736	0.92971	0.921618	0.879042	0.908504	0.900463	0.857355	0.874735	0.914012
tQC_NA_NA_348	0.898219	0.898293	0.836419	0.896589	0.891406	0.894863	0.893637	0.893847	0.907726	0.881566	0.908299	0.841445	0.935776	0.927874	0.841281	0.929532	0.910525	0.929814	0.915043	0.918052	0.919	0.93247	0.926218	0.926365	0.938496	0.871971	0.927186	0.933263	1	0.921139	0.927097	0.941449	0.935528	0.862779	0.876971	0.874484	0.844278	0.878342	0.89601
tQC_NA_NA_359	0.903461	0.89275	0.843647	0.905806	0.861283	0.898283	0.894396	0.900836	0.903082	0.92036	0.917188	0.824447	0.933459	0.917897	0.850624	0.92222	0.909865	0.933643	0.922277	0.925644	0.932458	0.939834	0.927395	0.912357	0.925334	0.870914	0.928222	0.92204	0.921139	1	0.925034	0.925766	0.937584	0.852462	0.872529	0.878036	0.860258	0.862792	0.888455
tQC_NA_NA_369	0.891381	0.891626	0.836593	0.88763	0.853862	0.893283	0.879383	0.903332	0.886005	0.882882	0.905303	0.803562	0.922411	0.896219	0.837617	0.913748	0.881342	0.916484	0.881294	0.908357	0.90419	0.925906	0.910533	0.916172	0.930925	0.881109	0.916186	0.906736	0.927097	0.925034	1	0.942213	0.91436	0.845737	0.849299	0.860922	0.847866	0.867699	0.88751
tQC_NA_NA_379	0.908497	0.906657	0.835774	0.901251	0.883972	0.897102	0.904665	0.911706	0.912766	0.891739	0.925236	0.814382	0.934632	0.905182	0.841281	0.930053	0.926183	0.935632	0.918501	0.915572	0.931691	0.943845	0.940221	0.928228	0.941335	0.870299	0.931131	0.92971	0.941449	0.925766	0.942213	1	0.93685	0.86864	0.868605	0.875669	0.858418	0.886405	0.901579
tQC_NA_NA_389	0.904673	0.887928	0.865547	0.903761	0.887185	0.89746	0.920561	0.903321	0.921715	0.912967	0.924434	0.841192	0.917393	0.923942	0.858233	0.926092	0.920761	0.927209	0.926809	0.919345	0.914508	0.938641	0.941141	0.903206	0.917251	0.876378	0.930993	0.921618	0.935528	0.937584	0.91436	0.93685	1	0.886826	0.891148	0.880944	0.8635	0.891993	0.901764
tQC_NA_NA_42	0.918141	0.900919	0.941417	0.911903	0.913563	0.932719	0.887916	0.871188	0.896612	0.890407	0.902497	0.919826	0.907174	0.889349	0.921873	0.886613	0.918035	0.90491	0.897634	0.906901	0.864279	0.875644	0.895863	0.907023	0.88943	0.939568	0.888516	0.879042	0.862779	0.852462	0.845737	0.86864	0.886826	1	0.905738	0.918375	0.909357	0.917713	0.940708
tQC_NA_NA_53	0.930026	0.917274	0.915369	0.914866	0.941119	0.940814	0.919142	0.914287	0.920702	0.915037	0.920403	0.934916	0.887041	0.917813	0.933564	0.899151	0.89791	0.918578	0.914894	0.903583	0.893662	0.910161	0.901928	0.87863	0.875634	0.93452	0.893955	0.908504	0.876971	0.872529	0.849299	0.868605	0.891148	0.905738	1	0.918512	0.921855	0.925704	0.927735
tQC_NA_NA_63	0.920766	0.945142	0.938705	0.940153	0.919065	0.941192	0.902149	0.910935	0.90856	0.907915	0.929804	0.909625	0.932412	0.916172	0.935692	0.91709	0.89674	0.923003	0.902306	0.907678	0.906297	0.89396	0.884498	0.893303	0.88238	0.942874	0.894782	0.900463	0.874484	0.878036	0.860922	0.875669	0.880944	0.918375	0.918512	1	0.914697	0.910548	0.939554
tQC_NA_NA_73	0.928716	0.905732	0.932363	0.894557	0.915864	0.911642	0.905095	0.900854	0.913458	0.905826	0.889247	0.896153	0.890323	0.883814	0.90401	0.88503	0.894061	0.891645	0.870972	0.874642	0.878967	0.892355	0.886001	0.859542	0.844143	0.922689	0.878354	0.857355	0.844278	0.860258	0.847866	0.858418	0.8635	0.909357	0.921855	0.914697	1	0.929576	0.911351
tQC_NA_NA_83	0.931416	0.910947	0.903494	0.913819	0.915438	0.920352	0.921866	0.917347	0.923836	0.90154	0.913012	0.891591	0.894924	0.900124	0.912944	0.894655	0.909935	0.906482	0.867008	0.892373	0.896876	0.909762	0.896567	0.884461	0.865054	0.9149	0.880647	0.874735	0.878342	0.862792	0.867699	0.886405	0.891993	0.917713	0.925704	0.910548	0.929576	1	0.923769
tQC_NA_NA_93	0.928737	0.93146	0.92657	0.930272	0.929715	0.947591	0.917271	0.899488	0.91673	0.930356	0.938782	0.888258	0.914966	0.909348	0.91567	0.922064	0.92632	0.937011	0.916244	0.911301	0.903345	0.905038	0.912074	0.910169	0.90041	0.936417	0.892402	0.914012	0.89601	0.888455	0.88751	0.901579	0.901764	0.940708	0.927735	0.939554	0.911351	0.923769	1

## Sheet: 4.Spearman_Cor_QC_STAVER
	tQC_NA_NA_226_F1_R1	tQC_NA_NA_379_F1_R1	tQC_NA_NA_114_F1_R1	tQC_NA_NA_165_F1_R1	tQC_NA_NA_73_F1_R1	tQC_NA_NA_144_F1_R1	tQC_NA_NA_308_F1_R1	tQC_NA_NA_287_F1_R1	tQC_NA_NA_257_F1_R1	tQC_NA_NA_389_F1_R1	tQC_NA_NA_206_F1_R1	tQC_NA_NA_134_F1_R1	tQC_NA_NA_22_F1_R1	tQC_NA_NA_359_F1_R1	tQC_NA_NA_53_F1_R1	tQC_NA_NA_328_F1_R1	tQC_NA_NA_277_F1_R1	tQC_NA_NA_83_F1_R1	tQC_NA_NA_195_F1_R1	tQC_NA_NA_42_F1_R1	tQC_NA_NA_175_F1_R1	tQC_NA_NA_2_F1_R1	tQC_NA_NA_318_F1_R1	tQC_NA_NA_297_F1_R1	tQC_NA_NA_63_F1_R1	tQC_NA_NA_236_F1_R1	tQC_NA_NA_369_F1_R1	tQC_NA_NA_12_F1_R1	tQC_NA_NA_104_F1_R1	tQC_NA_NA_348_F1_R1	tQC_NA_NA_338_F1_R1	tQC_NA_NA_155_F1_R1	tQC_NA_NA_93_F1_R1	tQC_NA_NA_246_F1_R1	tQC_NA_NA_185_F1_R1	tQC_NA_NA_216_F1_R1	tQC_NA_NA_124_F1_R1	tQC_NA_NA_32_F1_R1
tQC_NA_NA_226_F1_R1	1	0.89368	0.946643	0.946841	0.929125	0.95772	0.955495	0.908308	0.938609	0.949845	0.945502	0.936188	0.961106	0.94588	0.91622	0.961443	0.946936	0.942355	0.965537	0.941439	0.950986	0.94264	0.968575	0.947187	0.953982	0.949756	0.921622	0.915983	0.944362	0.935638	0.939042	0.95966	0.952682	0.916451	0.92776	0.929935	0.938004	0.935349
tQC_NA_NA_379_F1_R1	0.89368	1	0.935681	0.92985	0.920667	0.929496	0.954143	0.942498	0.923008	0.947459	0.951541	0.928624	0.914636	0.922124	0.930059	0.907498	0.967096	0.923349	0.918727	0.94142	0.921141	0.934104	0.881347	0.91804	0.915627	0.935199	0.931078	0.899352	0.934033	0.946401	0.955504	0.885878	0.915303	0.936205	0.899644	0.958842	0.940408	0.913027
tQC_NA_NA_114_F1_R1	0.946643	0.935681	1	0.9514	0.939162	0.947311	0.956124	0.947789	0.936912	0.951084	0.950127	0.944238	0.959539	0.940282	0.941437	0.929772	0.950854	0.97285	0.948348	0.9655	0.961857	0.952595	0.937714	0.944549	0.950237	0.939165	0.921064	0.948591	0.951314	0.951196	0.944993	0.965626	0.964704	0.947942	0.949025	0.964653	0.949403	0.953089
tQC_NA_NA_165_F1_R1	0.946841	0.92985	0.9514	1	0.960797	0.967437	0.960352	0.942519	0.952527	0.946617	0.943477	0.954002	0.966373	0.954444	0.949714	0.92526	0.942605	0.968074	0.941204	0.964427	0.95985	0.965339	0.931407	0.955064	0.969385	0.951354	0.931591	0.94216	0.964169	0.940399	0.941046	0.949352	0.958304	0.930111	0.918786	0.945745	0.962993	0.948433
tQC_NA_NA_73_F1_R1	0.929125	0.920667	0.939162	0.960797	1	0.959789	0.943062	0.956647	0.953981	0.954101	0.949995	0.951971	0.953153	0.945569	0.95268	0.934501	0.938309	0.960122	0.945291	0.970543	0.954989	0.962962	0.93734	0.928505	0.962274	0.921519	0.914021	0.946765	0.958419	0.941202	0.940241	0.956711	0.92858	0.924544	0.940716	0.952445	0.963566	0.955931
tQC_NA_NA_144_F1_R1	0.95772	0.929496	0.947311	0.967437	0.959789	1	0.946684	0.93263	0.939735	0.956075	0.967519	0.943929	0.960742	0.949241	0.949457	0.928808	0.945812	0.963188	0.951834	0.95089	0.950873	0.961496	0.944816	0.925562	0.966409	0.929929	0.921886	0.941164	0.962251	0.949167	0.950671	0.956284	0.962798	0.943768	0.945873	0.956552	0.963058	0.941232
tQC_NA_NA_308_F1_R1	0.955495	0.954143	0.956124	0.960352	0.943062	0.946684	1	0.958737	0.96284	0.967322	0.972244	0.953671	0.954861	0.956354	0.940843	0.970793	0.969822	0.948364	0.947394	0.950339	0.956469	0.941526	0.957648	0.964755	0.964697	0.961799	0.936694	0.937925	0.9694	0.959393	0.957317	0.954382	0.955642	0.964182	0.940867	0.95078	0.946142	0.939148
tQC_NA_NA_287_F1_R1	0.908308	0.942498	0.947789	0.942519	0.956647	0.93263	0.958737	1	0.932423	0.947597	0.945241	0.944736	0.916818	0.913983	0.94113	0.912649	0.93542	0.917833	0.909717	0.943318	0.930481	0.938226	0.912931	0.946208	0.924959	0.94004	0.9254	0.925636	0.963946	0.954241	0.947969	0.932841	0.934865	0.949575	0.946283	0.951692	0.946853	0.920696
tQC_NA_NA_257_F1_R1	0.938609	0.923008	0.936912	0.952527	0.953981	0.939735	0.96284	0.932423	1	0.931467	0.930033	0.923084	0.937792	0.945797	0.951679	0.92934	0.940967	0.934458	0.94981	0.956042	0.960163	0.940259	0.941165	0.94719	0.953499	0.949218	0.92187	0.90469	0.959601	0.930836	0.931118	0.943253	0.923677	0.925906	0.922223	0.933875	0.95646	0.951751
tQC_NA_NA_389_F1_R1	0.949845	0.947459	0.951084	0.946617	0.954101	0.956075	0.967322	0.947597	0.931467	1	0.958706	0.950285	0.927958	0.942679	0.935361	0.936179	0.963811	0.93009	0.936258	0.947219	0.93182	0.946331	0.948909	0.946875	0.936516	0.950221	0.944083	0.923586	0.948179	0.957201	0.969927	0.942958	0.935082	0.958121	0.945038	0.96513	0.943179	0.925567
tQC_NA_NA_206_F1_R1	0.945502	0.951541	0.950127	0.943477	0.949995	0.967519	0.972244	0.945241	0.930033	0.958706	1	0.959703	0.952085	0.933338	0.942592	0.939419	0.956531	0.948794	0.941308	0.963415	0.942183	0.956836	0.929538	0.953698	0.947294	0.957786	0.937833	0.932593	0.964983	0.961424	0.959012	0.9429	0.931057	0.962537	0.956882	0.960591	0.95643	0.927363
tQC_NA_NA_134_F1_R1	0.936188	0.928624	0.944238	0.954002	0.951971	0.943929	0.953671	0.944736	0.923084	0.950285	0.959703	1	0.934161	0.918553	0.943696	0.89008	0.935873	0.943233	0.920584	0.932197	0.928664	0.938692	0.89823	0.946202	0.937169	0.94191	0.9218	0.939715	0.940729	0.947846	0.939828	0.919268	0.93843	0.932621	0.921952	0.944084	0.928856	0.90468
tQC_NA_NA_22_F1_R1	0.961106	0.914636	0.959539	0.966373	0.953153	0.960742	0.954861	0.916818	0.937792	0.927958	0.952085	0.934161	1	0.921777	0.96234	0.948765	0.926356	0.965538	0.962501	0.961956	0.963104	0.970542	0.944966	0.955472	0.954741	0.955595	0.913325	0.940088	0.957244	0.919417	0.922149	0.968574	0.958926	0.939549	0.942132	0.934563	0.96123	0.949112
tQC_NA_NA_359_F1_R1	0.94588	0.922124	0.940282	0.954444	0.945569	0.949241	0.956354	0.913983	0.945797	0.942679	0.933338	0.918553	0.921777	1	0.898423	0.92782	0.929968	0.923773	0.945557	0.91858	0.936405	0.92398	0.933704	0.947464	0.954282	0.939148	0.943778	0.888711	0.952802	0.932011	0.930874	0.924596	0.941005	0.924053	0.903451	0.920561	0.934906	0.923756
tQC_NA_NA_53_F1_R1	0.91622	0.930059	0.941437	0.949714	0.95268	0.949457	0.940843	0.94113	0.951679	0.935361	0.942592	0.943696	0.96234	0.898423	1	0.918797	0.940406	0.95683	0.941909	0.957936	0.959617	0.957187	0.935058	0.926185	0.949199	0.923324	0.884856	0.953288	0.947568	0.922627	0.925198	0.947731	0.942942	0.946465	0.952446	0.946322	0.968136	0.948348
tQC_NA_NA_328_F1_R1	0.961443	0.907498	0.929772	0.92526	0.934501	0.928808	0.970793	0.912649	0.92934	0.936179	0.939419	0.89008	0.948765	0.92782	0.918797	1	0.93507	0.942659	0.936389	0.919551	0.934688	0.939737	0.955445	0.941011	0.92892	0.955295	0.935808	0.883067	0.916431	0.910158	0.918258	0.950153	0.93248	0.932	0.926692	0.939469	0.917248	0.924699
tQC_NA_NA_277_F1_R1	0.946936	0.967096	0.950854	0.942605	0.938309	0.945812	0.969822	0.93542	0.940967	0.963811	0.956531	0.935873	0.926356	0.929968	0.940406	0.93507	1	0.919973	0.932722	0.94726	0.934434	0.948021	0.935541	0.946575	0.933037	0.957977	0.93167	0.928271	0.964055	0.947202	0.956423	0.938119	0.932103	0.940922	0.960077	0.960699	0.951369	0.917234
tQC_NA_NA_83_F1_R1	0.942355	0.923349	0.97285	0.968074	0.960122	0.963188	0.948364	0.917833	0.934458	0.93009	0.948794	0.943233	0.965538	0.923773	0.95683	0.942659	0.919973	1	0.9547	0.968953	0.966628	0.960441	0.949498	0.950635	0.966027	0.953761	0.924459	0.914169	0.959664	0.926148	0.915508	0.976328	0.959097	0.951602	0.939267	0.943976	0.956877	0.959258
tQC_NA_NA_195_F1_R1	0.965537	0.918727	0.948348	0.941204	0.945291	0.951834	0.947394	0.909717	0.94981	0.936258	0.941308	0.920584	0.962501	0.945557	0.941909	0.936389	0.932722	0.9547	1	0.951327	0.946334	0.955955	0.932224	0.942459	0.959884	0.949009	0.91993	0.91951	0.956253	0.936282	0.916164	0.937897	0.965198	0.936155	0.91757	0.936269	0.947325	0.937187
tQC_NA_NA_42_F1_R1	0.941439	0.94142	0.9655	0.964427	0.970543	0.95089	0.950339	0.943318	0.956042	0.947219	0.963415	0.932197	0.961956	0.91858	0.957936	0.919551	0.94726	0.968953	0.951327	1	0.956474	0.974922	0.918228	0.927277	0.963664	0.914475	0.931444	0.943206	0.959221	0.952668	0.952432	0.939421	0.951116	0.947513	0.920026	0.966622	0.97173	0.953373
tQC_NA_NA_175_F1_R1	0.950986	0.921141	0.961857	0.95985	0.954989	0.950873	0.956469	0.930481	0.960163	0.93182	0.942183	0.928664	0.963104	0.936405	0.959617	0.934688	0.934434	0.966628	0.946334	0.956474	1	0.956595	0.957009	0.941813	0.959599	0.933597	0.910079	0.934747	0.949877	0.932679	0.925878	0.956989	0.960652	0.941819	0.94305	0.943852	0.958204	0.975905
tQC_NA_NA_2_F1_R1	0.94264	0.934104	0.952595	0.965339	0.962962	0.961496	0.941526	0.938226	0.940259	0.946331	0.956836	0.938692	0.970542	0.92398	0.957187	0.939737	0.948021	0.960441	0.955955	0.974922	0.956595	1	0.936005	0.92738	0.950891	0.931249	0.905234	0.954808	0.959051	0.954708	0.950643	0.960025	0.937788	0.931564	0.945441	0.941897	0.96229	0.947897
tQC_NA_NA_318_F1_R1	0.968575	0.881347	0.937714	0.931407	0.93734	0.944816	0.957648	0.912931	0.941165	0.948909	0.929538	0.89823	0.944966	0.933704	0.935058	0.955445	0.935541	0.949498	0.932224	0.918228	0.957009	0.936005	1	0.93508	0.953878	0.947992	0.935779	0.897523	0.917624	0.918655	0.923143	0.958614	0.950387	0.916594	0.93893	0.926885	0.918806	0.940319
tQC_NA_NA_297_F1_R1	0.947187	0.91804	0.944549	0.955064	0.928505	0.925562	0.964755	0.946208	0.94719	0.946875	0.953698	0.946202	0.955472	0.947464	0.926185	0.941011	0.946575	0.950635	0.942459	0.927277	0.941813	0.92738	0.93508	1	0.948796	0.954416	0.936247	0.908721	0.935952	0.952857	0.952743	0.935242	0.948895	0.943913	0.926238	0.942623	0.924912	0.930152
tQC_NA_NA_63_F1_R1	0.953982	0.915627	0.950237	0.969385	0.962274	0.966409	0.964697	0.924959	0.953499	0.936516	0.947294	0.937169	0.954741	0.954282	0.949199	0.92892	0.933037	0.966027	0.959884	0.963664	0.959599	0.950891	0.953878	0.948796	1	0.938981	0.931048	0.93111	0.968336	0.930882	0.926619	0.955715	0.959233	0.928578	0.937724	0.92178	0.946606	0.958424
tQC_NA_NA_236_F1_R1	0.949756	0.935199	0.939165	0.951354	0.921519	0.929929	0.961799	0.94004	0.949218	0.950221	0.957786	0.94191	0.955595	0.939148	0.923324	0.955295	0.957977	0.953761	0.949009	0.914475	0.933597	0.931249	0.947992	0.954416	0.938981	1	0.937508	0.9097	0.923206	0.954454	0.952444	0.94051	0.928402	0.9354	0.956226	0.943673	0.927497	0.924498
tQC_NA_NA_369_F1_R1	0.921622	0.931078	0.921064	0.931591	0.914021	0.921886	0.936694	0.9254	0.92187	0.944083	0.937833	0.9218	0.913325	0.943778	0.884856	0.935808	0.93167	0.924459	0.91993	0.931444	0.910079	0.905234	0.935779	0.936247	0.931048	0.937508	1	0.879979	0.942253	0.937031	0.954187	0.91397	0.906796	0.919983	0.9149	0.908122	0.918362	0.910096
tQC_NA_NA_12_F1_R1	0.915983	0.899352	0.948591	0.94216	0.946765	0.941164	0.937925	0.925636	0.90469	0.923586	0.932593	0.939715	0.940088	0.888711	0.953288	0.883067	0.928271	0.914169	0.91951	0.943206	0.934747	0.954808	0.897523	0.908721	0.93111	0.9097	0.879979	1	0.914705	0.921906	0.921267	0.930063	0.942789	0.907409	0.951041	0.912709	0.939463	0.91348
tQC_NA_NA_104_F1_R1	0.944362	0.934033	0.951314	0.964169	0.958419	0.962251	0.9694	0.963946	0.959601	0.948179	0.964983	0.940729	0.957244	0.952802	0.947568	0.916431	0.964055	0.959664	0.956253	0.959221	0.949877	0.959051	0.917624	0.935952	0.968336	0.923206	0.942253	0.914705	1	0.955414	0.947558	0.929991	0.959308	0.953997	0.915467	0.962848	0.963085	0.955005
tQC_NA_NA_348_F1_R1	0.935638	0.946401	0.951196	0.940399	0.941202	0.949167	0.959393	0.954241	0.930836	0.957201	0.961424	0.947846	0.919417	0.932011	0.922627	0.910158	0.947202	0.926148	0.936282	0.952668	0.932679	0.954708	0.918655	0.952857	0.930882	0.954454	0.937031	0.921906	0.955414	1	0.97125	0.908768	0.929271	0.962812	0.934474	0.966769	0.94957	0.921807
tQC_NA_NA_338_F1_R1	0.939042	0.955504	0.944993	0.941046	0.940241	0.950671	0.957317	0.947969	0.931118	0.969927	0.959012	0.939828	0.922149	0.930874	0.925198	0.918258	0.956423	0.915508	0.916164	0.952432	0.925878	0.950643	0.923143	0.952743	0.926619	0.952444	0.954187	0.921267	0.947558	0.97125	1	0.902345	0.920664	0.959846	0.928695	0.948641	0.958963	0.92556
tQC_NA_NA_155_F1_R1	0.95966	0.885878	0.965626	0.949352	0.956711	0.956284	0.954382	0.932841	0.943253	0.942958	0.9429	0.919268	0.968574	0.924596	0.947731	0.950153	0.938119	0.976328	0.937897	0.939421	0.956989	0.960025	0.958614	0.935242	0.955715	0.94051	0.91397	0.930063	0.929991	0.908768	0.902345	1	0.964396	0.914345	0.947667	0.93815	0.933223	0.937104
tQC_NA_NA_93_F1_R1	0.952682	0.915303	0.964704	0.958304	0.92858	0.962798	0.955642	0.934865	0.923677	0.935082	0.931057	0.93843	0.958926	0.941005	0.942942	0.93248	0.932103	0.959097	0.965198	0.951116	0.960652	0.937788	0.950387	0.948895	0.959233	0.928402	0.906796	0.942789	0.959308	0.929271	0.920664	0.964396	1	0.93118	0.938205	0.938778	0.94416	0.959137
tQC_NA_NA_246_F1_R1	0.916451	0.936205	0.947942	0.930111	0.924544	0.943768	0.964182	0.949575	0.925906	0.958121	0.962537	0.932621	0.939549	0.924053	0.946465	0.932	0.940922	0.951602	0.936155	0.947513	0.941819	0.931564	0.916594	0.943913	0.928578	0.9354	0.919983	0.907409	0.953997	0.962812	0.959846	0.914345	0.93118	1	0.927267	0.946808	0.946266	0.926929
tQC_NA_NA_185_F1_R1	0.92776	0.899644	0.949025	0.918786	0.940716	0.945873	0.940867	0.946283	0.922223	0.945038	0.956882	0.921952	0.942132	0.903451	0.952446	0.926692	0.960077	0.939267	0.91757	0.920026	0.94305	0.945441	0.93893	0.926238	0.937724	0.956226	0.9149	0.951041	0.915467	0.934474	0.928695	0.947667	0.938205	0.927267	1	0.946011	0.919701	0.93584
tQC_NA_NA_216_F1_R1	0.929935	0.958842	0.964653	0.945745	0.952445	0.956552	0.95078	0.951692	0.933875	0.96513	0.960591	0.944084	0.934563	0.920561	0.946322	0.939469	0.960699	0.943976	0.936269	0.966622	0.943852	0.941897	0.926885	0.942623	0.92178	0.943673	0.908122	0.912709	0.962848	0.966769	0.948641	0.93815	0.938778	0.946808	0.946011	1	0.968824	0.942808
tQC_NA_NA_124_F1_R1	0.938004	0.940408	0.949403	0.962993	0.963566	0.963058	0.946142	0.946853	0.95646	0.943179	0.95643	0.928856	0.96123	0.934906	0.968136	0.917248	0.951369	0.956877	0.947325	0.97173	0.958204	0.96229	0.918806	0.924912	0.946606	0.927497	0.918362	0.939463	0.963085	0.94957	0.958963	0.933223	0.94416	0.946266	0.919701	0.968824	1	0.959221
tQC_NA_NA_32_F1_R1	0.935349	0.913027	0.953089	0.948433	0.955931	0.941232	0.939148	0.920696	0.951751	0.925567	0.927363	0.90468	0.949112	0.923756	0.948348	0.924699	0.917234	0.959258	0.937187	0.953373	0.975905	0.947897	0.940319	0.930152	0.958424	0.924498	0.910096	0.91348	0.955005	0.921807	0.92556	0.937104	0.959137	0.926929	0.93584	0.942808	0.959221	1

## Sheet: 5.Protein_Nums_QC_Data
Sample	Num	Type
tQC_NA_NA_104	283	Rawdata
tQC_NA_NA_114	276	Rawdata
tQC_NA_NA_12	274	Rawdata
tQC_NA_NA_124	287	Rawdata
tQC_NA_NA_134	278	Rawdata
tQC_NA_NA_144	281	Rawdata
tQC_NA_NA_155	276	Rawdata
tQC_NA_NA_165	274	Rawdata
tQC_NA_NA_175	274	Rawdata
tQC_NA_NA_185	284	Rawdata
tQC_NA_NA_195	281	Rawdata
tQC_NA_NA_2	276	Rawdata
tQC_NA_NA_206	275	Rawdata
tQC_NA_NA_216	273	Rawdata
tQC_NA_NA_22	282	Rawdata
tQC_NA_NA_226	273	Rawdata
tQC_NA_NA_236	278	Rawdata
tQC_NA_NA_246	278	Rawdata
tQC_NA_NA_257	268	Rawdata
tQC_NA_NA_267	271	Rawdata
tQC_NA_NA_277	278	Rawdata
tQC_NA_NA_287	277	Rawdata
tQC_NA_NA_297	275	Rawdata
tQC_NA_NA_308	271	Rawdata
tQC_NA_NA_318	275	Rawdata
tQC_NA_NA_32	276	Rawdata
tQC_NA_NA_328	281	Rawdata
tQC_NA_NA_338	275	Rawdata
tQC_NA_NA_348	272	Rawdata
tQC_NA_NA_359	276	Rawdata
tQC_NA_NA_369	274	Rawdata
tQC_NA_NA_379	268	Rawdata
tQC_NA_NA_389	269	Rawdata
tQC_NA_NA_42	282	Rawdata
tQC_NA_NA_53	276	Rawdata
tQC_NA_NA_63	284	Rawdata
tQC_NA_NA_73	280	Rawdata
tQC_NA_NA_83	277	Rawdata
tQC_NA_NA_93	275	Rawdata
tQC_NA_NA_379_F1_R1	253	STAVER
tQC_NA_NA_348_F1_R1	280	STAVER
tQC_NA_NA_318_F1_R1	271	STAVER
tQC_NA_NA_308_F1_R1	260	STAVER
tQC_NA_NA_206_F1_R1	256	STAVER
tQC_NA_NA_257_F1_R1	266	STAVER
tQC_NA_NA_175_F1_R1	255	STAVER
tQC_NA_NA_359_F1_R1	275	STAVER
tQC_NA_NA_165_F1_R1	261	STAVER
tQC_NA_NA_277_F1_R1	273	STAVER
tQC_NA_NA_236_F1_R1	268	STAVER
tQC_NA_NA_42_F1_R1	265	STAVER
tQC_NA_NA_22_F1_R1	270	STAVER
tQC_NA_NA_2_F1_R1	277	STAVER
tQC_NA_NA_155_F1_R1	292	STAVER
tQC_NA_NA_32_F1_R1	290	STAVER
tQC_NA_NA_63_F1_R1	281	STAVER
tQC_NA_NA_73_F1_R1	280	STAVER
tQC_NA_NA_104_F1_R1	286	STAVER
tQC_NA_NA_216_F1_R1	264	STAVER
tQC_NA_NA_369_F1_R1	272	STAVER
tQC_NA_NA_297_F1_R1	278	STAVER
tQC_NA_NA_246_F1_R1	262	STAVER
tQC_NA_NA_144_F1_R1	261	STAVER
tQC_NA_NA_114_F1_R1	283	STAVER
tQC_NA_NA_53_F1_R1	271	STAVER
tQC_NA_NA_287_F1_R1	267	STAVER
tQC_NA_NA_124_F1_R1	286	STAVER
tQC_NA_NA_389_F1_R1	264	STAVER
tQC_NA_NA_338_F1_R1	256	STAVER
tQC_NA_NA_195_F1_R1	266	STAVER
tQC_NA_NA_226_F1_R1	285	STAVER
tQC_NA_NA_134_F1_R1	291	STAVER
tQC_NA_NA_12_F1_R1	293	STAVER
tQC_NA_NA_83_F1_R1	293	STAVER
tQC_NA_NA_185_F1_R1	270	STAVER
tQC_NA_NA_328_F1_R1	271	STAVER
tQC_NA_NA_93_F1_R1	290	STAVER

## Sheet: 6.Protein_Nums_Plasma_Serum
Samples	Protein Numbers	Type	Sort
Plasma_3-B1_13_35_F1_R1	272	Plasma	1
Plasma_3-F2_62_380_F1_R1	256	Plasma	2
Plasma_1-F5_65_149_F1_R1	266	Plasma	3
Plasma_3-B10_22_352_F1_R1	247	Plasma	4
Plasma_4-F1_61_347_F1_R1	266	Plasma	5
Plasma_4-F7_67_120_F1_R1	266	Plasma	6
Plasma_2-F11_71_178_F1_R1	267	Plasma	7
Plasma_4-B5_17_327_F1_R1	251	Plasma	8
Plasma_2-F7_67_238_F1_R1	267	Plasma	9
Plasma_2-B1_13_197_F1_R1	279	Plasma	10
Plasma_1-F3_63_316_F1_R1	249	Plasma	11
Plasma_4-B6_18_241_F1_R1	260	Plasma	12
Plasma_2-B6_18_283_F1_R1	258	Plasma	13
Plasma_4-F6_66_18_F1_R1	281	Plasma	14
Plasma_4-F12_72_182_F1_R1	290	Plasma	15
Plasma_1-B3_15_123_F1_R1	209	Plasma	16
Plasma_3-B8_20_106_F1_R1	276	Plasma	17
Plasma_2-F4_64_370_F1_R1	240	Plasma	18
Plasma_4-B2_14_19_F1_R1	273	Plasma	19
Plasma_2-B12_24_62_F1_R1	276	Plasma	20
Plasma_1-B12_24_110_F1_R1	265	Plasma	21
Plasma_3-B9_21_205_F1_R1	258	Plasma	22
Plasma_2-F6_66_9_F1_R1	273	Plasma	23
Plasma_1-F1_61_397_F1_R1	249	Plasma	24
Plasma_1-F4_64_128_F1_R1	257	Plasma	25
Plasma_4-B11_23_299_F1_R1	257	Plasma	26
Plasma_3-F8_68_253_F1_R1	248	Plasma	27
Plasma_1-F10_70_334_F1_R1	231	Plasma	28
Plasma_4-F8_68_146_F1_R1	270	Plasma	29
Plasma_1-B6_18_122_F1_R1	262	Plasma	30
Plasma_1-B9_21_183_F1_R1	253	Plasma	31
Plasma_2-B9_21_417_F1_R1	250	Plasma	32
Plasma_2-F5_65_310_F1_R1	269	Plasma	33
Plasma_3-B11_23_266_F1_R1	265	Plasma	34
Plasma_2-B7_19_302_F1_R1	256	Plasma	35
Plasma_3-B7_19_115_F1_R1	270	Plasma	36
Plasma_3-F4_64_54_F1_R1	284	Plasma	37
Plasma_4-F11_71_336_F1_R1	250	Plasma	38
Plasma_1-F9_69_97_F1_R1	253	Plasma	39
Plasma_1-F2_62_357_F1_R1	244	Plasma	40
Plasma_1-B5_17_24_F1_R1	242	Plasma	41
Plasma_4-B1_13_222_F1_R1	266	Plasma	42
Plasma_1-B11_23_46_F1_R1	224	Plasma	43
Plasma_1-F7_67_213_F1_R1	272	Plasma	44
Plasma_2-B8_20_346_F1_R1	250	Plasma	45
Plasma_4-F3_63_135_F1_R1	280	Plasma	46
Plasma_3-B6_18_259_F1_R1	254	Plasma	47
Plasma_1-F6_66_364_F1_R1	263	Plasma	48
Plasma_3-F1_61_164_F1_R1	273	Plasma	49
Plasma_1-B2_14_409_F1_R1	250	Plasma	50
Plasma_1-B4_16_129_F1_R1	267	Plasma	51
Plasma_3-F6_66_57_F1_R1	255	Plasma	52
Plasma_3-B12_24_203_F1_R1	271	Plasma	53
Plasma_4-B12_24_79_F1_R1	278	Plasma	54
Plasma_4-B8_20_125_F1_R1	278	Plasma	55
Plasma_2-B11_23_207_F1_R1	249	Plasma	56
Plasma_3-B5_17_139_F1_R1	259	Plasma	57
Plasma_1-F11_71_153_F1_R1	257	Plasma	58
Plasma_2-B10_22_291_F1_R1	265	Plasma	59
Plasma_2-B3_15_311_F1_R1	251	Plasma	60
Plasma_3-B2_14_279_F1_R1	260	Plasma	61
Plasma_2-F1_61_313_F1_R1	263	Plasma	62
Plasma_2-F9_69_273_F1_R1	258	Plasma	63
Plasma_4-F2_62_235_F1_R1	261	Plasma	64
Plasma_1-B8_20_58_F1_R1	296	Plasma	65
Plasma_4-F9_69_26_F1_R1	272	Plasma	66
Plasma_4-F4_64_88_F1_R1	279	Plasma	67
Plasma_4-F5_65_109_F1_R1	263	Plasma	68
Plasma_2-B4_16_160_F1_R1	274	Plasma	69
Plasma_1-B10_22_304_F1_R1	212	Plasma	70
Plasma_3-F12_72_50_F1_R1	278	Plasma	71
Plasma_3-F10_70_255_F1_R1	258	Plasma	72
Plasma_4-B10_22_355_F1_R1	256	Plasma	73
Plasma_4-B7_19_3_F1_R1	278	Plasma	74
Plasma_2-F8_68_358_F1_R1	252	Plasma	75
Plasma_3-F11_71_391_F1_R1	251	Plasma	76
Plasma_3-F5_65_237_F1_R1	265	Plasma	77
Plasma_3-B4_16_55_F1_R1	271	Plasma	78
Plasma_1-F8_68_406_F1_R1	249	Plasma	79
Plasma_2-F2_62_133_F1_R1	265	Plasma	80
Plasma_3-F7_67_87_F1_R1	282	Plasma	81
Plasma_2-F3_63_211_F1_R1	273	Plasma	82
Plasma_4-F10_70_156_F1_R1	267	Plasma	83
Plasma_3-F3_63_33_F1_R1	290	Plasma	84
Plasma_1-B7_19_363_F1_R1	253	Plasma	85
Plasma_2-B5_17_194_F1_R1	265	Plasma	86
Plasma_2-F12_72_428_F1_R1	263	Plasma	87
Plasma_4-B9_21_219_F1_R1	259	Plasma	88
Plasma_3-F9_69_25_F1_R1	267	Plasma	89
Plasma_4-B3_15_16_F1_R1	283	Plasma	90
Plasma_2-F10_70_408_F1_R1	252	Plasma	91
Serum_1-H3_87_416_F1_R1	260	Serum	1
Serum_1-D11_47_356_F1_R1	247	Serum	2
Serum_2-D10_46_184_F1_R1	254	Serum	3
Serum_3-H1_85_349_F1_R1	261	Serum	4
Serum_4-D8_44_270_F1_R1	243	Serum	5
Serum_2-H8_92_126_F1_R1	264	Serum	6
Serum_1-D2_38_342_F1_R1	265	Serum	7
Serum_3-H10_94_85_F1_R1	272	Serum	8
Serum_3-H3_87_217_F1_R1	259	Serum	9
Serum_4-D11_47_179_F1_R1	262	Serum	10
Serum_3-D2_38_290_F1_R1	260	Serum	11
Serum_2-H3_87_247_F1_R1	272	Serum	12
Serum_1-D6_42_398_F1_R1	234	Serum	13
Serum_2-H9_93_333_F1_R1	255	Serum	14
Serum_1-D9_45_395_F1_R1	250	Serum	15
Serum_2-D4_40_13_F1_R1	278	Serum	16
Serum_3-H11_95_385_F1_R1	259	Serum	17
Serum_3-H6_90_172_F1_R1	254	Serum	18
Serum_2-D2_38_78_F1_R1	286	Serum	19
Serum_3-H7_91_250_F1_R1	259	Serum	20
Serum_3-H4_88_289_F1_R1	263	Serum	21
Serum_3-D8_44_6_F1_R1	282	Serum	22
Serum_4-H10_94_119_F1_R1	279	Serum	23
Serum_2-H4_88_154_F1_R1	288	Serum	24
Serum_4-H12_96_419_F1_R1	252	Serum	25
Serum_2-D6_42_392_F1_R1	247	Serum	26
Serum_2-D1_37_36_F1_R1	281	Serum	27
Serum_3-D3_39_293_F1_R1	260	Serum	28
Serum_3-H2_86_233_F1_R1	253	Serum	29
Serum_1-D3_39_220_F1_R1	248	Serum	30
Serum_3-D7_43_309_F1_R1	263	Serum	31
Serum_1-D7_43_70_F1_R1	268	Serum	32
Serum_1-D4_40_56_F1_R1	268	Serum	33
Serum_1-H4_88_274_F1_R1	268	Serum	34
Serum_2-D12_48_75_F1_R1	269	Serum	35
Serum_2-H5_89_121_F1_R1	277	Serum	36
Serum_2-D8_44_15_F1_R1	266	Serum	37
Serum_4-H11_95_278_F1_R1	263	Serum	38
Serum_4-H9_93_373_F1_R1	246	Serum	39
Serum_2-H10_94_249_F1_R1	273	Serum	40
Serum_3-D4_40_187_F1_R1	248	Serum	41
Serum_2-H6_90_157_F1_R1	276	Serum	42
Serum_1-H1_85_145_F1_R1	276	Serum	43
Serum_3-D10_46_86_F1_R1	270	Serum	44
Serum_1-H6_90_361_F1_R1	251	Serum	45
Serum_3-D5_41_45_F1_R1	263	Serum	46
Serum_2-H1_85_214_F1_R1	280	Serum	47
Serum_3-D9_45_71_F1_R1	279	Serum	48
Serum_1-H5_89_39_F1_R1	252	Serum	49
Serum_1-D8_44_137_F1_R1	249	Serum	50
Serum_1-H2_86_345_F1_R1	254	Serum	51
Serum_4-D12_48_64_F1_R1	290	Serum	52
Serum_2-H7_91_41_F1_R1	276	Serum	53
Serum_3-D11_47_424_F1_R1	254	Serum	54
Serum_3-H9_93_28_F1_R1	268	Serum	55
Serum_1-H8_92_7_F1_R1	278	Serum	56
Serum_3-D6_42_244_F1_R1	255	Serum	57
Serum_1-H7_91_288_F1_R1	268	Serum	58
Serum_3-H5_89_167_F1_R1	262	Serum	59
Serum_4-D10_46_285_F1_R1	243	Serum	60
Serum_2-D11_47_108_F1_R1	270	Serum	61
Serum_3-D12_48_240_F1_R1	261	Serum	62
Serum_3-H8_92_89_F1_R1	259	Serum	63
Serum_2-D3_39_230_F1_R1	261	Serum	64
Serum_2-D5_41_229_F1_R1	242	Serum	65
Serum_2-H2_86_37_F1_R1	271	Serum	66
Serum_1-D1_37_113_F1_R1	277	Serum	67
Serum_2-D9_45_132_F1_R1	274	Serum	68
Serum_2-D7_43_377_F1_R1	249	Serum	69
Serum_1-D12_48_169_F1_R1	248	Serum	70
Serum_3-D1_37_107_F1_R1	284	Serum	71
Serum_4-D9_45_340_F1_R1	238	Serum	72

## Sheet: 7.Serum_Plasma_CV
CV	Type	Coefficient of Variation [%]
0.303449	Serum	30.3449
0.178546	Serum	17.8546
0.152512	Serum	15.2512
0.212197	Serum	21.2197
0.175171	Serum	17.5171
0.191849	Serum	19.1849
0.412141	Serum	41.2141
0.422714	Serum	42.2714
0.230367	Serum	23.0367
0.264727	Serum	26.4727
0.29272	Serum	29.272
0.345507	Serum	34.5507
0.28141	Serum	28.141
0.173307	Serum	17.3307
0.25414	Serum	25.414
0.249343	Serum	24.9343
0.245582	Serum	24.5582
0.215215	Serum	21.5215
0.163949	Serum	16.3949
0.316929	Serum	31.6929
0.62824	Serum	62.824
0.435269	Serum	43.5269
0.21893	Serum	21.893
0.252706	Serum	25.2706
0.304838	Serum	30.4838
0.2402	Serum	24.02
0.231419	Serum	23.1419
0.305602	Serum	30.5602
0.141009	Serum	14.1009
0.478818	Serum	47.8818
0.400857	Serum	40.0857
0.204187	Serum	20.4187
0.221158	Serum	22.1158
0.276255	Serum	27.6255
0.311131	Serum	31.1131
0.206688	Serum	20.6688
0.253801	Serum	25.3801
0.349002	Serum	34.9002
0.351718	Serum	35.1718
0.277865	Serum	27.7865
0.371859	Serum	37.1859
0.146327	Serum	14.6327
0.21928	Serum	21.928
0.38992	Serum	38.992
0.50353	Serum	50.353
0.19443	Serum	19.443
0.22712	Serum	22.712
0.251288	Serum	25.1288
0.311272	Serum	31.1272
0.249803	Serum	24.9803
0.186569	Serum	18.6569
0.188152	Serum	18.8152
0.172791	Serum	17.2791
0.275175	Serum	27.5175
0.397539	Serum	39.7539
0.174921	Serum	17.4921
0.197618	Serum	19.7618
0.222141	Serum	22.2141
0.292856	Serum	29.2856
0.165952	Serum	16.5952
0.246205	Serum	24.6205
0.157163	Serum	15.7163
0.190295	Serum	19.0295
0.309486	Serum	30.9486
0.239746	Serum	23.9746
0.34864	Serum	34.864
0.237613	Serum	23.7613
0.200295	Serum	20.0295
0.219611	Serum	21.9611
0.770673	Serum	77.0673
0.234355	Serum	23.4355
0.174651	Serum	17.4651
0.199084	Serum	19.9084
0.300186	Serum	30.0186
0.165247	Serum	16.5247
0.199096	Serum	19.9096
0.39028	Serum	39.028
0.336597	Serum	33.6597
0.206734	Serum	20.6734
0.195685	Serum	19.5685
0.35033	Serum	35.033
0.213249	Serum	21.3249
0.37466	Serum	37.466
0.1947	Serum	19.47
0.250372	Serum	25.0372
0.287044	Serum	28.7044
0.20459	Serum	20.459
0.269089	Serum	26.9089
0.325707	Serum	32.5707
0.198054	Serum	19.8054
0.22803	Serum	22.803
0.345731	Serum	34.5731
0.317005	Serum	31.7005
0.396824	Serum	39.6824
0.256138	Serum	25.6138
0.312279	Serum	31.2279
0.377752	Serum	37.7752
0.229871	Serum	22.9871
0.434995	Serum	43.4995
0.205996	Serum	20.5996
0.296219	Serum	29.6219
0.527009	Serum	52.7009
0.254947	Serum	25.4947
0.32033	Serum	32.033
0.259005	Serum	25.9005
0.247432	Serum	24.7432
0.544123	Serum	54.4123
0.256219	Serum	25.6219
0.250651	Serum	25.0651
0.267439	Serum	26.7439
0.297624	Serum	29.7624
0.156352	Serum	15.6352
0.318861	Serum	31.8861
0.28629	Serum	28.629
0.264745	Serum	26.4745
0.261927	Serum	26.1927
0.442618	Serum	44.2618
0.299658	Serum	29.9658
0.271073	Serum	27.1073
0.253718	Serum	25.3718
0.223271	Serum	22.3271
0.213458	Serum	21.3458
0.424323	Serum	42.4323
0.186915	Serum	18.6915
0.288529	Serum	28.8529
0.264154	Serum	26.4154
1.21553	Serum	121.553
0.220478	Serum	22.0478
0.247058	Serum	24.7058
0.184383	Serum	18.4383
0.553372	Serum	55.3372
0.253628	Serum	25.3628
0.227449	Serum	22.7449
0.237308	Serum	23.7308
0.351998	Serum	35.1998
0.207829	Serum	20.7829
0.240727	Serum	24.0727
0.146255	Serum	14.6255
0.404073	Serum	40.4073
0.326999	Serum	32.6999
0.269696	Serum	26.9696
0.168476	Serum	16.8476
0.157413	Serum	15.7413
0.232551	Serum	23.2551
0.249958	Serum	24.9958
0.184357	Serum	18.4357
0.210414	Serum	21.0414
0.270834	Serum	27.0834
0.167032	Serum	16.7032
0.252037	Serum	25.2037
0.33337	Serum	33.337
0.323419	Serum	32.3419
0.148085	Serum	14.8085
0.95592	Serum	95.592
0.294164	Serum	29.4164
0.288264	Serum	28.8264
0.356961	Serum	35.6961
0.145316	Serum	14.5316
0.322286	Serum	32.2286
0.170019	Serum	17.0019
0.486198	Serum	48.6198
0.334508	Serum	33.4508
0.346281	Serum	34.6281
0.41962	Serum	41.962
0.209795	Serum	20.9795
0.197181	Serum	19.7181
0.120458	Serum	12.0458
0.280644	Serum	28.0644
0.266413	Serum	26.6413
0.21323	Serum	21.323
0.146962	Serum	14.6962
2.22358	Serum	222.358
0.22304	Serum	22.304
0.298271	Serum	29.8271
0.233874	Serum	23.3874
0.29746	Serum	29.746
0.161269	Serum	16.1269
0.273155	Serum	27.3155
0.222892	Serum	22.2892
0.163399	Serum	16.3399
0.304347	Serum	30.4347
0.327127	Serum	32.7127
0.18549	Serum	18.549
0.227529	Serum	22.7529
0.232178	Serum	23.2178
0.1718	Serum	17.18
0.253696	Serum	25.3696
0.22196	Serum	22.196
0.408222	Serum	40.8222
0.31163	Serum	31.163
0.252133	Serum	25.2133
0.228491	Serum	22.8491
0.233437	Serum	23.3437
0.60065	Serum	60.065
0.525025	Serum	52.5025
0.286183	Serum	28.6183
0.394783	Serum	39.4783
0.142361	Serum	14.2361
0.213932	Serum	21.3932
0.239932	Serum	23.9932
0.184323	Serum	18.4323
0.204826	Serum	20.4826
0.0911358	Serum	9.11358
0.186448	Serum	18.6448
0.0987981	Serum	9.87981
0.269079	Serum	26.9079
0.251096	Serum	25.1096
0.223443	Serum	22.3443
0.32463	Serum	32.463
0.344435	Serum	34.4435
0.567746	Serum	56.7746
0.269325	Serum	26.9325
0.252192	Serum	25.2192
0.301662	Serum	30.1662
0.359227	Serum	35.9227
0.281602	Serum	28.1602
0.231779	Serum	23.1779
0.238219	Serum	23.8219
0.461022	Serum	46.1022
0.419397	Serum	41.9397
0.268525	Serum	26.8525
0.258623	Serum	25.8623
0.493618	Serum	49.3618
0.339847	Serum	33.9847
0.174047	Serum	17.4047
0.219244	Serum	21.9244
0.228639	Serum	22.8639
0.229941	Serum	22.9941
0.373417	Serum	37.3417
0.221715	Serum	22.1715
0.184688	Serum	18.4688
0.184291	Serum	18.4291
0.231762	Serum	23.1762
0.226271	Serum	22.6271
0.498578	Serum	49.8578
0.361984	Serum	36.1984
0.419348	Serum	41.9348
0.144231	Serum	14.4231
0.257628	Serum	25.7628
0.496772	Serum	49.6772
0.288089	Serum	28.8089
0.209713	Serum	20.9713
0.279987	Serum	27.9987
0.24425	Serum	24.425
0.230857	Serum	23.0857
1.28135	Serum	128.135
0.166164	Serum	16.6164
0.0867608	Serum	8.67608
0.975877	Serum	97.5877
0.180214	Serum	18.0214
0.173924	Serum	17.3924
0.273808	Serum	27.3808
0.559984	Serum	55.9984
0.179579	Serum	17.9579
0.314458	Serum	31.4458
0.192483	Serum	19.2483
0.280975	Serum	28.0975
0.126654	Serum	12.6654
0.371976	Serum	37.1976
0.292292	Serum	29.2292
0.228909	Serum	22.8909
0.141105	Serum	14.1105
0.348657	Serum	34.8657
0.293819	Serum	29.3819
0.208559	Serum	20.8559
0.740899	Serum	74.0899
0.228267	Serum	22.8267
0.376679	Serum	37.6679
0.260621	Serum	26.0621
0.154012	Serum	15.4012
0.117245	Serum	11.7245
0.317856	Serum	31.7856
0.262483	Serum	26.2483
0.364915	Serum	36.4915
0.552862	Serum	55.2862
0.191406	Serum	19.1406
0.416652	Serum	41.6652
0.340928	Serum	34.0928
0.390752	Serum	39.0752
0.221839	Serum	22.1839
0.283091	Serum	28.3091
0.219254	Serum	21.9254
0.492857	Serum	49.2857
0.165578	Serum	16.5578
0.196502	Serum	19.6502
0.279312	Serum	27.9312
0.197161	Serum	19.7161
0.205937	Serum	20.5937
0.396137	Serum	39.6137
0.26535	Serum	26.535
0.178816	Serum	17.8816
0.459471	Serum	45.9471
0.176116	Serum	17.6116
0.40825	Serum	40.825
0.173765	Serum	17.3765
0.247268	Serum	24.7268
0.181623	Serum	18.1623
0.158102	Serum	15.8102
0.241613	Serum	24.1613
0.178817	Serum	17.8817
0.225818	Serum	22.5818
0.185022	Serum	18.5022
0.190449	Serum	19.0449
0.23855	Serum	23.855
0.186896	Serum	18.6896
0.236224	Serum	23.6224
0.257194	Serum	25.7194
0.15738	Serum	15.738
0.343947	Serum	34.3947
0.218785	Serum	21.8785
0.367441	Serum	36.7441
0.382689	Serum	38.2689
0.2021	Serum	20.21
0.244857	Serum	24.4857
0.319701	Serum	31.9701
0.143291	Serum	14.3291
0.184208	Serum	18.4208
0.257883	Serum	25.7883
0.423411	Serum	42.3411
0.186241	Serum	18.6241
0.296612	Serum	29.6612
0.187988	Serum	18.7988
0.184968	Serum	18.4968
0.082929	Serum	8.2929
0.457871	Serum	45.7871
0.139767	Serum	13.9767
0.246693	Serum	24.6693
0.207452	Serum	20.7452
0.213249	Serum	21.3249
0.120388	Serum	12.0388
0.176498	Serum	17.6498
0.14906	Serum	14.906
0.241881	Serum	24.1881
0.337671	Serum	33.7671
0.188724	Serum	18.8724
0.263104	Serum	26.3104
0.20075	Serum	20.075
0.0911393	Serum	9.11393
0.181126	Serum	18.1126
0.290335	Serum	29.0335
0.166486	Serum	16.6486
0.241055	Serum	24.1055
0.218459	Serum	21.8459
0.226264	Serum	22.6264
0.231544	Serum	23.1544
0.3634	Serum	36.34
0.227135	Serum	22.7135
0.35305	Serum	35.305
0.152637	Serum	15.2637
0.294697	Serum	29.4697
0.0806974	Serum	8.06974
0.217837	Serum	21.7837
0.1667	Serum	16.67
0.142415	Serum	14.2415
0.283566	Serum	28.3566
0.0694365	Serum	6.94365
0.307505	Serum	30.7505
0.317677	Serum	31.7677
0.342009	Serum	34.2009
0.200894	Serum	20.0894
0.615465	Serum	61.5465
0.333719	Serum	33.3719
0.02	Serum	2
0.304945	Serum	30.4945
0.369179	Serum	36.9179
0.117319	Serum	11.7319
0.127083	Serum	12.7083
0.170865	Serum	17.0865
0.219379	Serum	21.9379
0.280743	Serum	28.0743
0.137968	Serum	13.7968
0.108446	Serum	10.8446
0.322473	Serum	32.2473
0.255207	Serum	25.5207
0.160468	Serum	16.0468
0.296123	Serum	29.6123
0.246622	Serum	24.6622
0.421394	Serum	42.1394
0.230701	Serum	23.0701
0.162469	Serum	16.2469
0.198976	Serum	19.8976
0.169553	Serum	16.9553
0.204332	Serum	20.4332
0.256739	Serum	25.6739
0.275547	Serum	27.5547
0.363244	Serum	36.3244
0.213998	Serum	21.3998
0.412956	Serum	41.2956
0.376605	Serum	37.6605
0.206158	Serum	20.6158
1.15931	Serum	115.931
0.259576	Serum	25.9576
0.337974	Serum	33.7974
0.131561	Serum	13.1561
0.356303	Serum	35.6303
0.136073	Serum	13.6073
0.278744	Serum	27.8744
0.241783	Serum	24.1783
0.261382	Serum	26.1382
0.218839	Serum	21.8839
0.213509	Serum	21.3509
0.193728	Serum	19.3728
0.149127	Serum	14.9127
0.35772	Serum	35.772
0.326682	Serum	32.6682
0.300544	Serum	30.0544
0.184832	Serum	18.4832
0.128707	Serum	12.8707
0.241246	Serum	24.1246
0.1528	Serum	15.28
0.186831	Serum	18.6831
0.207026	Serum	20.7026
0.11112	Serum	11.112
0.0677089	Serum	6.77089
0.265921	Serum	26.5921
0.19635	Serum	19.635
0.199213	Serum	19.9213
0.333777	Serum	33.3777
0.262516	Serum	26.2516
0.225165	Serum	22.5165
0.212145	Serum	21.2145
0.144843	Serum	14.4843
0.311222	Serum	31.1222
0.123209	Serum	12.3209
0.283051	Serum	28.3051
0.141883	Serum	14.1883
0.141915	Serum	14.1915
0.335345	Serum	33.5345
0.205715	Serum	20.5715
0.301029	Serum	30.1029
0.373613	Serum	37.3613
0.344222	Serum	34.4222
0.244637	Serum	24.4637
0.304584	Serum	30.4584
0.132671	Serum	13.2671
0.219456	Serum	21.9456
0.137446	Serum	13.7446
0.164949	Serum	16.4949
0.162289	Serum	16.2289
0.473686	Serum	47.3686
0.184066	Serum	18.4066
0.210865	Serum	21.0865
0.236609	Serum	23.6609
0.495878	Serum	49.5878
0.233919	Serum	23.3919
0.100397	Serum	10.0397
0.229362	Serum	22.9362
0.413986	Serum	41.3986
0.424985	Serum	42.4985
0.234054	Serum	23.4054
0.317977	Serum	31.7977
0.621931	Serum	62.1931
0.280683	Serum	28.0683
0.16229	Serum	16.229
0.181852	Serum	18.1852
0.270609	Serum	27.0609
0.289856	Serum	28.9856
0.113547	Serum	11.3547
0.217887	Serum	21.7887
0.161243	Serum	16.1243
0.248588	Serum	24.8588
0.185043	Serum	18.5043
0.206679	Serum	20.6679
0.166793	Serum	16.6793
0.157385	Serum	15.7385
0.438975	Serum	43.8975
0.39984	Serum	39.984
0.498672	Serum	49.8672
0.359757	Serum	35.9757
0.266027	Serum	26.6027
0.191906	Serum	19.1906
0.266761	Serum	26.6761
0.361893	Serum	36.1893
0.0844128	Serum	8.44128
0.561126	Serum	56.1126
0.217559	Serum	21.7559
0.200909	Serum	20.0909
0.260831	Serum	26.0831
0.726528	Serum	72.6528
0.132945	Serum	13.2945
0.139052	Serum	13.9052
0.184558	Serum	18.4558
0.273836	Serum	27.3836
0.142275	Serum	14.2275
0.13644	Serum	13.644
0.356878	Serum	35.6878
1.5788	Serum	157.88
0.750182	Serum	75.0182
0.288936	Serum	28.8936
0.182309	Serum	18.2309
0.170308	Serum	17.0308
0.129362	Serum	12.9362
0.237144	Serum	23.7144
0.483233	Serum	48.3233
0.130591	Serum	13.0591
0.136443	Serum	13.6443
0.201992	Serum	20.1992
0.0604866	Serum	6.04866
0.0951987	Serum	9.51987
0.178034	Serum	17.8034
0.126022	Serum	12.6022
0.11538	Serum	11.538
0.216346	Serum	21.6346
0.591392	Serum	59.1392
0.191822	Serum	19.1822
0.177622	Serum	17.7622
0.356995	Serum	35.6995
0.158385	Serum	15.8385
0.17266	Serum	17.266
0.215477	Serum	21.5477
0.17687	Serum	17.687
0.517873	Serum	51.7873
0.145303	Serum	14.5303
0.233157	Serum	23.3157
0.0711928	Serum	7.11928
0.173366	Serum	17.3366
0.177684	Serum	17.7684
0.412667	Serum	41.2667
0.333112	Serum	33.3112
0.201935	Serum	20.1935
0.222154	Serum	22.2154
0.177001	Serum	17.7001
0.0977233	Serum	9.77233
0.471637	Serum	47.1637
0.143224	Serum	14.3224
0.572304	Serum	57.2304
0.198275	Serum	19.8275
0.348114	Serum	34.8114
0.243758	Serum	24.3758
0.19793	Serum	19.793
0.169787	Serum	16.9787
0.672607	Serum	67.2607
0.151536	Serum	15.1536
0.274702	Plasma	27.4702
0.157897	Plasma	15.7897
0.250561	Plasma	25.0561
0.184553	Plasma	18.4553
0.16992	Plasma	16.992
0.167836	Plasma	16.7836
0.486759	Plasma	48.6759
0.427863	Plasma	42.7863
0.329753	Plasma	32.9753
0.250616	Plasma	25.0616
0.316982	Plasma	31.6982
0.345117	Plasma	34.5117
0.292925	Plasma	29.2925
0.207455	Plasma	20.7455
0.26039	Plasma	26.039
0.260217	Plasma	26.0217
0.345363	Plasma	34.5363
0.233404	Plasma	23.3404
0.214903	Plasma	21.4903
0.164943	Plasma	16.4943
0.221358	Plasma	22.1358
0.624542	Plasma	62.4542
0.558074	Plasma	55.8074
0.248334	Plasma	24.8334
0.210541	Plasma	21.0541
0.33572	Plasma	33.572
0.209604	Plasma	20.9604
0.251447	Plasma	25.1447
0.176835	Plasma	17.6835
0.151176	Plasma	15.1176
0.506222	Plasma	50.6222
0.403488	Plasma	40.3488
0.169977	Plasma	16.9977
0.30148	Plasma	30.148
0.262995	Plasma	26.2995
0.266987	Plasma	26.6987
0.279457	Plasma	27.9457
0.233286	Plasma	23.3286
0.271966	Plasma	27.1966
0.406012	Plasma	40.6012
0.19771	Plasma	19.771
0.321639	Plasma	32.1639
0.231661	Plasma	23.1661
0.222927	Plasma	22.2927
0.239776	Plasma	23.9776
0.950196	Plasma	95.0196
0.213752	Plasma	21.3752
0.271528	Plasma	27.1528
0.282872	Plasma	28.2872
0.247239	Plasma	24.7239
0.190823	Plasma	19.0823
0.170737	Plasma	17.0737
0.174648	Plasma	17.4648
0.204859	Plasma	20.4859
0.253035	Plasma	25.3035
0.339537	Plasma	33.9537
0.214858	Plasma	21.4858
0.136608	Plasma	13.6608
0.186149	Plasma	18.6149
0.260685	Plasma	26.0685
0.153827	Plasma	15.3827
0.250417	Plasma	25.0417
0.20413	Plasma	20.413
0.2357	Plasma	23.57
0.249361	Plasma	24.9361
0.269257	Plasma	26.9257
0.39653	Plasma	39.653
0.246435	Plasma	24.6435
0.189337	Plasma	18.9337
0.250756	Plasma	25.0756
0.910249	Plasma	91.0249
0.138433	Plasma	13.8433
0.162973	Plasma	16.2973
0.233344	Plasma	23.3344
0.349663	Plasma	34.9663
0.326561	Plasma	32.6561
0.190671	Plasma	19.0671
0.155157	Plasma	15.5157
0.254096	Plasma	25.4096
0.2986	Plasma	29.86
0.234295	Plasma	23.4295
0.174438	Plasma	17.4438
0.229717	Plasma	22.9717
0.171773	Plasma	17.1773
0.241273	Plasma	24.1273
0.233765	Plasma	23.3765
0.150186	Plasma	15.0186
0.265501	Plasma	26.5501
0.320235	Plasma	32.0235
0.209992	Plasma	20.9992
0.251772	Plasma	25.1772
0.335541	Plasma	33.5541
0.188786	Plasma	18.8786
0.187112	Plasma	18.7112
0.189738	Plasma	18.9738
0.334131	Plasma	33.4131
0.165779	Plasma	16.5779
0.380291	Plasma	38.0291
0.224422	Plasma	22.4422
0.268903	Plasma	26.8903
0.248116	Plasma	24.8116
0.242467	Plasma	24.2467
0.38421	Plasma	38.421
0.163716	Plasma	16.3716
0.174552	Plasma	17.4552
0.219713	Plasma	21.9713
0.210747	Plasma	21.0747
0.457391	Plasma	45.7391
0.472924	Plasma	47.2924
0.207111	Plasma	20.7111
0.408524	Plasma	40.8524
0.158068	Plasma	15.8068
0.216168	Plasma	21.6168
0.284297	Plasma	28.4297
0.539682	Plasma	53.9682
0.261272	Plasma	26.1272
0.286801	Plasma	28.6801
0.231987	Plasma	23.1987
0.270098	Plasma	27.0098
0.337766	Plasma	33.7766
0.195349	Plasma	19.5349
0.279624	Plasma	27.9624
0.164133	Plasma	16.4133
0.277699	Plasma	27.7699
0.276144	Plasma	27.6144
0.245913	Plasma	24.5913
0.284326	Plasma	28.4326
0.350446	Plasma	35.0446
0.291368	Plasma	29.1368
0.22777	Plasma	22.777
0.308503	Plasma	30.8503
0.259562	Plasma	25.9562
0.241093	Plasma	24.1093
0.225012	Plasma	22.5012
0.299684	Plasma	29.9684
0.170077	Plasma	17.0077
0.250025	Plasma	25.0025
0.263499	Plasma	26.3499
0.237477	Plasma	23.7477
0.205079	Plasma	20.5079
0.231764	Plasma	23.1764
0.259188	Plasma	25.9188
0.4713	Plasma	47.13
0.246891	Plasma	24.6891
0.226362	Plasma	22.6362
0.169594	Plasma	16.9594
0.234115	Plasma	23.4115
0.227575	Plasma	22.7575
0.48411	Plasma	48.411
0.127461	Plasma	12.7461
0.168293	Plasma	16.8293
0.217414	Plasma	21.7414
0.417859	Plasma	41.7859
0.231341	Plasma	23.1341
0.194708	Plasma	19.4708
0.230804	Plasma	23.0804
0.270171	Plasma	27.0171
0.12834	Plasma	12.834
0.185989	Plasma	18.5989
0.668965	Plasma	66.8965
0.163291	Plasma	16.3291
0.203013	Plasma	20.3013
0.253994	Plasma	25.3994
0.214258	Plasma	21.4258
0.231515	Plasma	23.1515
0.41323	Plasma	41.323
0.274583	Plasma	27.4583
0.338901	Plasma	33.8901
0.175925	Plasma	17.5925
0.568223	Plasma	56.8223
1.14146	Plasma	114.146
0.272924	Plasma	27.2924
0.2312	Plasma	23.12
0.239864	Plasma	23.9864
0.552779	Plasma	55.2779
0.107293	Plasma	10.7293
0.305417	Plasma	30.5417
0.30856	Plasma	30.856
0.0778795	Plasma	7.78795
0.186889	Plasma	18.6889
0.397438	Plasma	39.7438
0.312147	Plasma	31.2147
0.14413	Plasma	14.413
0.766075	Plasma	76.6075
0.217342	Plasma	21.7342
0.167204	Plasma	16.7204
0.443351	Plasma	44.3351
0.195759	Plasma	19.5759
0.252375	Plasma	25.2375
0.214322	Plasma	21.4322
0.202556	Plasma	20.2556
0.164042	Plasma	16.4042
2.54701	Plasma	254.701
0.0617632	Plasma	6.17632
0.211862	Plasma	21.1862
0.575249	Plasma	57.5249
0.284455	Plasma	28.4455
0.307294	Plasma	30.7294
0.489412	Plasma	48.9412
0.196859	Plasma	19.6859
0.287056	Plasma	28.7056
0.165237	Plasma	16.5237
0.245455	Plasma	24.5455
0.377758	Plasma	37.7758
0.395404	Plasma	39.5404
0.353852	Plasma	35.3852
0.162789	Plasma	16.2789
0.313081	Plasma	31.3081
0.28987	Plasma	28.987
0.182916	Plasma	18.2916
0.163942	Plasma	16.3942
0.175874	Plasma	17.5874
0.224135	Plasma	22.4135
0.288805	Plasma	28.8805
0.223139	Plasma	22.3139
0.308486	Plasma	30.8486
0.282781	Plasma	28.2781
0.261115	Plasma	26.1115
0.291408	Plasma	29.1408
0.195908	Plasma	19.5908
0.546719	Plasma	54.6719
0.472549	Plasma	47.2549
0.245385	Plasma	24.5385
0.723041	Plasma	72.3041
0.268368	Plasma	26.8368
0.118107	Plasma	11.8107
0.163309	Plasma	16.3309
0.154658	Plasma	15.4658
0.215617	Plasma	21.5617
0.166765	Plasma	16.6765
0.182028	Plasma	18.2028
0.142608	Plasma	14.2608
0.273829	Plasma	27.3829
0.3113	Plasma	31.13
0.219056	Plasma	21.9056
0.28459	Plasma	28.459
0.177508	Plasma	17.7508
0.302125	Plasma	30.2125
0.366439	Plasma	36.6439
0.388281	Plasma	38.8281
0.276159	Plasma	27.6159
0.338409	Plasma	33.8409
0.203259	Plasma	20.3259
0.267502	Plasma	26.7502
0.25618	Plasma	25.618
0.32088	Plasma	32.088
0.256603	Plasma	25.6603
0.299556	Plasma	29.9556
0.216408	Plasma	21.6408
0.142861	Plasma	14.2861
0.594935	Plasma	59.4935
0.375194	Plasma	37.5194
0.309715	Plasma	30.9715
0.2078	Plasma	20.78
0.574036	Plasma	57.4036
0.281093	Plasma	28.1093
0.162162	Plasma	16.2162
0.278495	Plasma	27.8495
0.292295	Plasma	29.2295
0.327712	Plasma	32.7712
0.279452	Plasma	27.9452
0.434724	Plasma	43.4724
0.062905	Plasma	6.2905
0.222887	Plasma	22.2887
0.221927	Plasma	22.1927
0.213974	Plasma	21.3974
0.137687	Plasma	13.7687
0.187603	Plasma	18.7603
0.252831	Plasma	25.2831
0.257229	Plasma	25.7229
0.345036	Plasma	34.5036
0.393446	Plasma	39.3446
0.192547	Plasma	19.2547
0.242227	Plasma	24.2227
0.596086	Plasma	59.6086
0.258516	Plasma	25.8516
0.189505	Plasma	18.9505
0.221128	Plasma	22.1128
0.274089	Plasma	27.4089
0.155711	Plasma	15.5711
0.105108	Plasma	10.5108
0.306297	Plasma	30.6297
0.121706	Plasma	12.1706
0.162421	Plasma	16.2421
0.768208	Plasma	76.8208
0.224767	Plasma	22.4767
0.150658	Plasma	15.0658
0.234036	Plasma	23.4036
0.78633	Plasma	78.633
0.316637	Plasma	31.6637
0.109971	Plasma	10.9971
0.136041	Plasma	13.6041
0.310047	Plasma	31.0047
0.188328	Plasma	18.8328
0.294778	Plasma	29.4778
0.278153	Plasma	27.8153
0.31589	Plasma	31.589
0.389308	Plasma	38.9308
0.0889526	Plasma	8.89526
0.278106	Plasma	27.8106
0.243926	Plasma	24.3926
0.221188	Plasma	22.1188
0.129693	Plasma	12.9693
0.338858	Plasma	33.8858
0.4596	Plasma	45.96
0.384813	Plasma	38.4813
0.163447	Plasma	16.3447
0.743886	Plasma	74.3886
0.211155	Plasma	21.1155
0.395021	Plasma	39.5021
0.240519	Plasma	24.0519
0.251921	Plasma	25.1921
0.188066	Plasma	18.8066
0.181316	Plasma	18.1316
0.282962	Plasma	28.2962
0.249905	Plasma	24.9905
0.235489	Plasma	23.5489
0.360527	Plasma	36.0527
0.60232	Plasma	60.232
0.318348	Plasma	31.8348
0.283365	Plasma	28.3365
0.312503	Plasma	31.2503
0.261365	Plasma	26.1365
0.283296	Plasma	28.3296
0.326425	Plasma	32.6425
0.381103	Plasma	38.1103
0.25343	Plasma	25.343
0.225765	Plasma	22.5765
0.250782	Plasma	25.0782
0.305989	Plasma	30.5989
0.214596	Plasma	21.4596
0.762564	Plasma	76.2564
0.186544	Plasma	18.6544
0.0879162	Plasma	8.79162
0.173992	Plasma	17.3992
0.163495	Plasma	16.3495
0.250441	Plasma	25.0441
0.160139	Plasma	16.0139
0.200707	Plasma	20.0707
0.436096	Plasma	43.6096
0.302499	Plasma	30.2499
0.340207	Plasma	34.0207
0.259098	Plasma	25.9098
0.2189	Plasma	21.89
0.144738	Plasma	14.4738
0.173523	Plasma	17.3523
0.798893	Plasma	79.8893
0.116924	Plasma	11.6924
0.880551	Plasma	88.0551
0.267947	Plasma	26.7947
0.625548	Plasma	62.5548
0.270611	Plasma	27.0611
0.230575	Plasma	23.0575
0.243056	Plasma	24.3056
0.135565	Plasma	13.5565
0.195991	Plasma	19.5991
0.135865	Plasma	13.5865
0.352562	Plasma	35.2562
0.172234	Plasma	17.2234
0.138292	Plasma	13.8292
0.169779	Plasma	16.9779
0.228637	Plasma	22.8637
0.214185	Plasma	21.4185
0.172873	Plasma	17.2873
0.22699	Plasma	22.699
0.243367	Plasma	24.3367
0.151014	Plasma	15.1014
0.498921	Plasma	49.8921
0.179264	Plasma	17.9264
0.244927	Plasma	24.4927
0.159243	Plasma	15.9243
0.208413	Plasma	20.8413
0.211833	Plasma	21.1833
0.151709	Plasma	15.1709
0.321644	Plasma	32.1644
0.170077	Plasma	17.0077
0.183764	Plasma	18.3764
0.326415	Plasma	32.6415
0.184178	Plasma	18.4178
0.218544	Plasma	21.8544
0.177405	Plasma	17.7405
0.436186	Plasma	43.6186
0.31739	Plasma	31.739
0.385615	Plasma	38.5615
0.286322	Plasma	28.6322
0.157925	Plasma	15.7925
0.23087	Plasma	23.087
0.154639	Plasma	15.4639
0.103127	Plasma	10.3127
0.147514	Plasma	14.7514
0.088911	Plasma	8.8911
0.233123	Plasma	23.3123
0.172815	Plasma	17.2815
0.436523	Plasma	43.6523
0.413756	Plasma	41.3756
0.157333	Plasma	15.7333
0.312425	Plasma	31.2425
0.171233	Plasma	17.1233
0.159329	Plasma	15.9329
0.200461	Plasma	20.0461
0.379288	Plasma	37.9288
0.0952499	Plasma	9.52499
0.358194	Plasma	35.8194
0.227407	Plasma	22.7407
0.131613	Plasma	13.1613
0.162371	Plasma	16.2371
0.26123	Plasma	26.123
0.39656	Plasma	39.656
0.213365	Plasma	21.3365
1.06656	Plasma	106.656
1.17969	Plasma	117.969
0.14635	Plasma	14.635
1.57072	Plasma	157.072
0.337218	Plasma	33.7218
0.19465	Plasma	19.465
0.178895	Plasma	17.8895
0.188456	Plasma	18.8456
0.0921805	Plasma	9.21805
0.270944	Plasma	27.0944
0.249416	Plasma	24.9416
0.131229	Plasma	13.1229
0.157788	Plasma	15.7788
0.150191	Plasma	15.0191
0.21839	Plasma	21.839
0.234862	Plasma	23.4862
0.202291	Plasma	20.2291
0.301698	Plasma	30.1698
0.21791	Plasma	21.791
0.0798018	Plasma	7.98018
0.206465	Plasma	20.6465
0.125566	Plasma	12.5566
0.191349	Plasma	19.1349
0.971124	Plasma	97.1124
0.162644	Plasma	16.2644
0.27428	Plasma	27.428
0.254348	Plasma	25.4348
0.247731	Plasma	24.7731
0.328985	Plasma	32.8985
0.259551	Plasma	25.9551
0.204753	Plasma	20.4753
0.149982	Plasma	14.9982
0.180352	Plasma	18.0352
0.196115	Plasma	19.6115
0.238419	Plasma	23.8419
0.206284	Plasma	20.6284
0.135823	Plasma	13.5823
0.142708	Plasma	14.2708
0.353779	Plasma	35.3779
0.337276	Plasma	33.7276
0.316865	Plasma	31.6865
0.201096	Plasma	20.1096
0.198628	Plasma	19.8628
0.141939	Plasma	14.1939
1.39889	Plasma	139.889
0.176657	Plasma	17.6657
0.306858	Plasma	30.6858
0.146069	Plasma	14.6069
0.267723	Plasma	26.7723
0.566049	Plasma	56.6049
0.144263	Plasma	14.4263
0.287833	Plasma	28.7833
0.297899	Plasma	29.7899
0.444968	Plasma	44.4968
0.159782	Plasma	15.9782
0.470427	Plasma	47.0427
0.316269	Plasma	31.6269
0.170092	Plasma	17.0092
0.261257	Plasma	26.1257
0.14878	Plasma	14.878
0.33474	Plasma	33.474
0.225971	Plasma	22.5971
0.052831	Plasma	5.2831
0.188476	Plasma	18.8476
0.652326	Plasma	65.2326
0.279423	Plasma	27.9423
0.153468	Plasma	15.3468
0.312251	Plasma	31.2251
0.420054	Plasma	42.0054
0.170331	Plasma	17.0331
0.198527	Plasma	19.8527
0.516544	Plasma	51.6544
0.148449	Plasma	14.8449
0.236328	Plasma	23.6328
0.327692	Plasma	32.7692
0.159323	Plasma	15.9323
0.157144	Plasma	15.7144
0.145601	Plasma	14.5601
0.179649	Plasma	17.9649
0.208436	Plasma	20.8436
0.258003	Plasma	25.8003
0.143255	Plasma	14.3255
0.252271	Plasma	25.2271
0.213326	Plasma	21.3326
0.284802	Plasma	28.4802
0.433902	Plasma	43.3902
0.113957	Plasma	11.3957
0.134828	Plasma	13.4828
1.39183	Plasma	139.183
0.175659	Plasma	17.5659
0.117412	Plasma	11.7412
0.176944	Plasma	17.6944
0.329497	Plasma	32.9497
0.358232	Plasma	35.8232
0.139003	Plasma	13.9003
0.761378	Plasma	76.1378
0.579083	Plasma	57.9083
0.150801	Plasma	15.0801
0.264099	Plasma	26.4099
1.14264	Plasma	114.264
0.0858168	Plasma	8.58168
0.27774	Plasma	27.774
0.198896	Plasma	19.8896
0.782142	Plasma	78.2142
0.206275	Plasma	20.6275
0.512551	Plasma	51.2551
0.207267	Plasma	20.7267
0.274761	Plasma	27.4761
0.113621	Plasma	11.3621
0.157878	Plasma	15.7878
0.25955	Plasma	25.955
0.218409	Plasma	21.8409
0.466279	Plasma	46.6279
0.150779	Plasma	15.0779
0.207621	Plasma	20.7621
0.198932	Plasma	19.8932
0.427614	Plasma	42.7614
0.189671	Plasma	18.9671
0.166329	Plasma	16.6329
0.174018	Plasma	17.4018
1.10812	Plasma	110.812
0.405685	Plasma	40.5685
0.195694	Plasma	19.5694
0.220026	Plasma	22.0026
0.194753	Plasma	19.4753
0.135897	Plasma	13.5897
0.101754	Plasma	10.1754
0.203058	Plasma	20.3058
0.190443	Plasma	19.0443
0.397677	Plasma	39.7677
0.197488	Plasma	19.7488
0.234879	Plasma	23.4879
0.150735	Plasma	15.0735
0.402406	Plasma	40.2406
0.421396	Plasma	42.1396
0.222355	Plasma	22.2355
0.312776	Plasma	31.2776
0.439333	Plasma	43.9333
0.255421	Plasma	25.5421
0.156499	Plasma	15.6499
0.541296	Plasma	54.1296
0.240004	Plasma	24.0004
0.280142	Plasma	28.0142
0.172226	Plasma	17.2226
0.372827	Plasma	37.2827
0.334502	Plasma	33.4502
0.238213	Plasma	23.8213
0.143425	Plasma	14.3425
0.204475	Plasma	20.4475
0.15041	Plasma	15.041
0.153305	Plasma	15.3305
0.162485	Plasma	16.2485
0.105428	Plasma	10.5428
0.221253	Plasma	22.1253
0.48665	Plasma	48.665
0.280846	Plasma	28.0846
0.282918	Plasma	28.2918
0.0641486	Plasma	6.41486
0.0710039	Plasma	7.10039
0.367379	Plasma	36.7379
0.239414	Plasma	23.9414
0.250127	Plasma	25.0127
0.196469	Plasma	19.6469
0.420606	Plasma	42.0606
0.119622	Plasma	11.9622
0.217844	Plasma	21.7844
0.777174	Plasma	77.7174
0.243881	Plasma	24.3881
0.306904	Plasma	30.6904
0.171828	Plasma	17.1828
0.125255	Plasma	12.5255
0.126263	Plasma	12.6263
0.152475	Plasma	15.2475
0.521416	Plasma	52.1416
1.53356	Plasma	153.356
0.210635	Plasma	21.0635
0.516618	Plasma	51.6618
0.166757	Plasma	16.6757
0.115302	Plasma	11.5302
0.342421	Plasma	34.2421
0.188642	Plasma	18.8642
0.150427	Plasma	15.0427
0.0872381	Plasma	8.72381

## Sheet: 8.Reported_Covid_Biomarkers
Assessed biomarker entity ID	Main x-ref	Assessed biomarker entity	Biomarker	BEST biomarker type	Specimen type	LOINC code	Disease name	Assessed entity type	Literature evidence	Notes
A0001	UPKB:P05231	Interleukin-6 (IL6)	increased IL6 level	monitoring	blood (UN:0000178)	26881-3	COVID-19 (DOID:0080600)	gene or protein	Serial measurement of circulating IL-6 levels may be important in identifying disease progression among COVID-19-infected patients. [PMID:32259560] The decrease of IL-6 was closely related to treatment effectiveness, while the increase of IL-6 indicated disease exacerbation. Collectively, the dynamic change of IL-6 level can be used as a marker for disease monitoring in patients with severe COVID…	Measured in serum (UN:0001977) as well.
A0001	UPKB:P05231	Interleukin-6 (IL6)	increased IL6 level	prognostic	blood (UN:0000178)	26881-3	COVID-19 (DOID:0080600)	gene or protein	A deep network analysis has suggested clinical biomarkers predicting the higher risk of severe COVID-19 infection: Hypertension, elevated serum Alanine aminotransferase, high Interleukin-6, and low Lymphocytes count.In particular, patients with diabetes, but also those with prediabetic state, deserve special attention. [PMID:32438331] The serum levels of IL-6 and CRP can effectively assess diseas…	Measured in serum (UN:0001977) as well.
A0002	PCCID:56841902	Procalcitonin (PCT)	increased PCT level	monitoring	blood (UN:0000178)	33959-8	COVID-19 (DOID:0080600)	gene or protein	Procalcitonin values are associated with a nearly 5-fold higher risk of severe SARS-COV-2 infection. [PMID:32145275] Compared with the nonsevere group, most of severe cases demonstrated elevated levels of infection-related biomarkers, including procalcitonin (0.1 vs 0.05 ng/mL; P < .001), serum ferritin (800.4 vs 523.7 ng/mL; P < .001), and C-reactive protein (57.9 vs 33.2 mg/L; P < .001). [PMID:…	Measured in serum (UN:0001977) as well.
A0002	PCCID:56841902	Procalcitonin (PCT)	increased PCT level	prognostic	blood (UN:0000178)	33959-8	COVID-19 (DOID:0080600)	gene or protein	Serial procalcitonin measurement may play a role for predicting evolution towards a more severe form of disease. [PMID:32145275] Increased procalcitonin values were associated with a nearly 5-fold higher risk of severe infection (OR = 4.76; 95% CI: 2.74-8.29, I2 = 34%). [PMID:32282949]	Measured in serum (UN:0001977) as well.
A0003	CO:CL_0000738	White blood cell (WBC)	increased WBC count	monitoring	blood (UN:0000178)	26464-8	COVID-19 (DOID:0080600)	cell	In hospitalized patients with respiratory distress, we recommend clinicians closely monitor WBC count, lymphocyte count, platelet count, IL-6 and serum ferritin as markers for potential progression to critical illness. [PMID:32286245] With following parameters such as age >67.5 years, IL2R >793.5U/mL, CRP >30.7ng/mL, ferroprotein >2252ug/L, WBC>9.5x10^9/L or NC >7.305x10^9/L, the progress of COVI…
A0003	CO:CL_0000738	White blood cell (WBC)	increased WBC count	prognostic	blood (UN:0000178)	26464-8	COVID-19 (DOID:0080600)	cell	Patients with flu had higher WBC, granulocyte and granulocyte/lymphocyte ratio, compared with COVID-19 patients. [PMID:32281668] In hospitalized patients with respiratory distress, we recommend clinicians closely monitor WBC count, lymphocyte count, platelet count, IL-6 and serum ferritin as markers for potential progression to critical illness. [PMID:32286245]
A0003	CO:CL_0000738	White blood cell (WBC)	increased WBC count	prognostic	blood (UN:0000178)	NA	COVID-19 (DOID:0080600)	cell	A retrospective study including 187 patients with COVID-19 from another hospital in Wuhan showed that patients with high troponin-T levels had leukocytosis (P < .001), increased neutrophils (P < .001) and decreased lymphocytes (P = .01). [PMID:32282949]
A0004	CO:CL_0000542	Lymphocyte (LYMP)	decreased LYMP count	prognostic	blood (UN:0000178)	26474-7	COVID-19 (DOID:0080600)	cell	Patients with higher initial SAA are more likely to have poor CT imaging. Our study indicated that SAA/L. CRP, SAA, and l are valuable in predicting the severity and distinguishing critically ill patients from mild ones. [PMID:32277967] Lymphocytes and platelet count showed significantly lower levels in severe patients compared to non-severe patients. [PMID:32475810] the combinations of the hypoa…
A0004	CO:CL_0000542	Lymphocyte (LYMP)	decreased LYMP count	monitoring	blood (UN:0000178)	26474-7	COVID-19 (DOID:0080600)	cell	SAA and Lymphocytes are sensitive indicators in evaluating the severity and prognosis of COVID-19. [PMID:32277967] Biomarkers that predict the mortality of individual patients more than 10 days in advance with more than 90% accuracy: lactic dehydrogenase (LDH), lymphocyte and high-sensitivity C-reactive protein (hs-CRP). [DOI:10.1038/s42256-020-0180-7] Lower lymphocyte counts, higher leukocyte co…
A0004	CO:CL_0000542	Lymphocyte (LYMP)	decreased LYMP count	diagnostic	blood (UN:0000178)	NA	COVID-19 (DOID:0080600)	cell	Detailed clinical investigation of 140 hospitalized COVID-19 cases suggests eosinopenia together with lymphopenia may be a potential indicator for diagnosis. [PMID:32077115]
A0004	CO:CL_0000542	Lymphocyte (LYMP)	decreased LYMP count	prognostic	blood (UN:0000178)	NA	COVID-19 (DOID:0080600)	cell	Lymphopenia is a prominent part of severe COVID-19 and a lymphocyte count of less than 1.5 x 10^9/L may be useful in predicting the severity clinical outcomes. [PMID:32376308]
A0005	CO:CL_0000233	Platelet (PLAT)	decreased PLAT count	prognostic	blood (UN:0000178)	11125-2	COVID-19 (DOID:0080600)	cell	Low platelet count is associated with increased risk of severe disease and mortality in patients with COVID-19, and thus should serve as clinical indicator of worsening illness during hospitalization. [PMID:32178975] In hospitalized patients with respiratory distress, we recommend clinicians closely monitor WBC count, lymphocyte count, platelet count, IL-6 and serum ferritin as markers for potent…
A0005	CO:CL_0000233	Platelet (PLAT)	decreased PLAT count	monitoring	blood (UN:0000178)	11125-2	COVID-19 (DOID:0080600)	cell	Meta-analysis of 1799 patients reveal those with severe COVID-19 infections had significantly lower platelet counts. Despite the varying definitions of disease severity and thrombocytopenia having an influence on results analysis, platelet count could possibly be used clinically to indicate infection severity. Lymphocytes and platelet count showed significantly lower levels in severe patients com…
A0006	PRO:PR_000050342	Serum ferritin (SFER)	increased SFER level	prognostic	blood (UN:0000178)	2276-04-01	COVID-19 (DOID:0080600)	gene or protein	In hospitalized patients with respiratory distress, we recommend clinicians closely monitor WBC count, lymphocyte count, platelet count, IL-6 and serum ferritin as markers for potential progression to critical illness. [PMID:32286245] Higher serum ferritin levels were associated with higher odds of death at the univariate analysis (OR = 9.10, 95%CI: 2.04-40.58; P = .004). [PMID:32282949]	Measured in serum (UN:0001977).
A0006	PRO:PR_000050342	Serum ferritin (SFER)	increased SFER level	monitoring	blood (UN:0000178)	2276-04-01	COVID-19 (DOID:0080600)	gene or protein	Higher serum ferritin levels were associated with higher odds of death at the univariate analysis (OR = 9.10, 95%CI: 2.04-40.58; P = .004). [PMID:32282949] In hospitalized patients with respiratory distress, we recommend clinicians closely monitor WBC count, lymphocyte count, platelet count, IL-6 and serum ferritin as markers for potential progression to critical illness. [PMID:32286245]	Measured in serum (UN:0001977).
A0007	CO:CL_0000624	CD4+ T cell (CD4+ T)	decreased CD4+ T count	diagnostic	blood (UN:0000178)	65759-3	COVID-19 (DOID:0080600)	cell	Consequently, the counts of CD8+T and CD4+T cells can be used as diagnostic markers of COVID-19 and predictors of disease severity. [PMID:32379887] Lymphocyte subset (CD4+, CD8+) counts reflect the severity of infection and predict the clinical outcomes in patients with COVID-19. [PMID:32283159]
A0008	CO:CL_0000795	CD8+ T cell (CD8+ T)	decreased CD8+ T count	diagnostic	blood (UN:0000178)	65759-3	COVID-19 (DOID:0080600)	cell	Consequently, the counts of CD8+T and CD4+T cells can be used as diagnostic markers of COVID-19 and predictors of disease severity. [PMID:32379887] Lymphocyte subset (CD4+, CD8+) counts reflect the severity of infection and predict the clinical outcomes in patients with COVID-19. [PMID:32283159]
A0009	UPKB:P02741	C-reactive protein (CRP)	increased CRP level	monitoring	blood (UN:0000178)	71426-1	COVID-19 (DOID:0080600)	gene or protein	SAA/L, CRP, SAA, and L count are valuable in predicting the severity and distinguishing critically ill patients from mild ones. [PMID:32277967] Elevated levels of IL-6, D-dimer, CRP, LDH, and ferritin all had an independent increased risk for the clinical outcomes assessed (ICU admission, invasive ventilatory support and death), which were statistically significant. [DOI:10.1101/2020.05.27.201151…	Measured in serum (UN:0001977) and plasma (UN:0001969) as well.
A0009	UPKB:P02741	C-reactive protein (CRP)	increased CRP level	prognostic	blood (UN:0000178)	71426-1	COVID-19 (DOID:0080600)	gene or protein	The combination of eosinopenia and elevated hs-CRP can effectively triage suspected COVID-19 patients from other patients attending the fever clinic with COVID-19-like initial symptoms. [PMID:32368728] Patients with higher initial SAA are more likely to have poor CT imaging. Our study indicated that SAA/L. CRP, SAA, and l are valuable in predicting the severity and distinguishing critically ill p…	Measured in serum (UN:0001977) as well.
A0009	UPKB:P02741	C-reactive protein (CRP)	increased CRP level	diagnostic	blood (UN:0000178)	71426-1	COVID-19 (DOID:0080600)	gene or protein	C-reactive protein, serum amyloid A, interleukin-6, lactate dehydrogenase, neutrophil-to-lymphocyte ratio, D-dimer, cardiac troponin, and renal biomarkers showed significantly higher levels in patients with severe complications of COVID-19 infection compared to their non-severe counterparts. [PMID:32475810]	Measured in serum (UN:0001977) as well.
A0014	CHEBI:17855	Triglycerides (TG)	increased TG level	monitoring	blood (UN:0000178)	3043-07-01	COVID-19 (DOID:0080600)	metabolite	Clinicians should consider monitoring for hypertriglyceridemia. [PMID:32314799] We measured an extended panel of circulating biomarkers and used a disease-specific scale (BCRSS) to quickly classify respiratory severity in patients with COVID-19, we found extremely high levels of CRP, ferritin, D-Dimer and triglycerides indicating that a HIS was present at the time when the respiratory condition w…
A0015	UPKB:P08684	Cytochrome P450 3A4 (CYP3A4)	increased CYP3A4 level	response	blood (UN:0000178)	NA	COVID-19 (DOID:0080600)	gene or protein	Together with the reported markers of liver injury, such hyperinflammatory state may trigger significant derangements in hepatic cytochrome P450 metabolic machinery, and subsequent modulation of drug clearance that may result in unexpected therapeutic/toxic response. We hypothesize that COVID-19 patients are potentially vulnerable to a significant disease-drug interaction, and therefore, suitable…
A0016	UPKB:P0DJI8	Serum amyloid A protein (SAA1)	increased SAA1 level	monitoring	blood (UN:0000178)	NA	COVID-19 (DOID:0080600)	gene or protein	Based on the study results, SAA alone or combined with L(SAA/L) could be used as a significant marker to indicate and track inflammation conditions in COVID-19 infected patients. Monitoring dynamic changes of SAA, combined with CT imaging could be a valuable strategy in the diagnosis and treatment of COVID-19. SAA and L are sensitive indicators in evaluating the severity and prognosis of COVID-19…	Measured in serum (UN:0001977) as well.
A0017	UPKB:P02778	IFN-gamma-inducible protein 10 (CXCL10)	increased CXCL10 level	monitoring	blood (UN:0000178)	NA	COVID-19 (DOID:0080600)	gene or protein	IFN-gamma-induced protein 10 and monocyte chemotactic protein-3 were excellent predictors for the progression of COVID-19. [PMID:32360286]	Measured in plasma (UN:0001969) as well.
A0017	UPKB:P02778	IFN-gamma-inducible protein 10 (CXCL10)	increased CXCL10 level	monitoring	blood (UN:0000178)	NA	COVID-19 (DOID:0080600)	gene or protein	We noted that patients infected with 2019-nCoV also had high amounts of IL1B, IFN gamma, IP10, and MCP1, probably leading to activated T-helper-1 (Th1) cell responses. Moreover, patients requiring ICU admission had higher concentrations of GCSF, IP10, MCP1, MIP1A, and TNF alpha than did those not requiring ICU admission, suggesting that the cytokine storm was associated with disease severity. [PM…	Measured in plasma (UN:0001969) as well.
A0017	UPKB:P02778	IFN-gamma-inducible protein 10 (CXCL10)	increased CXCL10 level	prognostic	blood (UN:0000178)	NA	COVID-19 (DOID:0080600)	gene or protein	IP-10 and MCP-3 were highly associated with disease severity and could be used as excellent predictors of COVID-19 progression. [PMID:32360286]	Measured in plasma (UN:0001969) as well.
A0018	UPKB:P80098	Monocyte chemotactic protein-3 (CCL7)	increased CCL7 level	monitoring	blood (UN:0000178)	NA	COVID-19 (DOID:0080600)	gene or protein	We noted that patients infected with 2019-nCoV also had high amounts of IL1B, IFN gamma, IP10, and MCP1, probably leading to activated T-helper-1 (Th1) cell responses. Moreover, patients requiring ICU admission had higher concentrations of GCSF, IP10, MCP1, MIP1A, and TNF alpha than did those not requiring ICU admission, suggesting that the cytokine storm was associated with disease severity. [PM…	Measured in serum (UN:0001977) and plasma (UN:0001969) as well.
A0018	UPKB:P80098	Monocyte chemotactic protein-3 (CCL7)	increased CCL7 level	prognostic	blood (UN:0000178)	NA	COVID-19 (DOID:0080600)	gene or protein	IP-10 and MCP-3 were highly associated with disease severity and could be used as excellent predictors of COVID-19 progression. [PMID:32360286]	Measured in plasma (UN:0001969) as well.
A0019	CO:CL_0000094	Granulocyte (GRAN)	increased GRAN count	prognostic	blood (UN:0000178)	30394-1	COVID-19 (DOID:0080600)	cell	Patients with flu had higher WBC, granulocyte and granulocyte/lymphocyte ratio, compared with COVID-19 patients. [PMID:32281668]
A0020	PRO:PR_000050369	D-dimer (D-D)	increased D-D level	monitoring	blood (UN:0000178)	71427-9	COVID-19 (DOID:0080600)	gene or protein	Elevated levels of IL-6, D-dimer, CRP, LDH, and ferritin all had an independent increased risk for the clinical outcomes assessed (ICU admission, invasive ventilatory support and death), which were statistically significant. [DOI:10.1101/2020.05.27.20115105] C-reactive protein, serum amyloid A, interleukin-6, lactate dehydrogenase, neutrophil-to-lymphocyte ratio, D-dimer, cardiac troponin, and re…
A0020	PRO:PR_000050369	D-dimer (D-D)	increased D-D level	prognostic	blood (UN:0000178)	71427-9	COVID-19 (DOID:0080600)	gene or protein	Patients with D-dimer levels >/=2.0 ug/mL had a higher incidence of mortality when comparing with those who with D-dimer levels <2.0 ug/mL (12/67 vs 1/267, P < .001; hazard ratio, 51.5; 95% confidence interval, 12.9-206.7). [PMID:32306492] D-dimer is commonly elevated in patients with COVID-19. D-dimer levels correlate with disease severity and is a reliable prognostic marker for in-hospital mort…
A0021	PRO:PR_000050367	Lactate dehydrogenase (LDH)	increased LDH level	monitoring	blood (UN:0000178)	14804-9	COVID-19 (DOID:0080600)	gene or protein	Elevated levels of IL-6, D-dimer, CRP, LDH, and ferritin all had an independent increased risk for the clinical outcomes assessed (ICU admission, invasive ventilatory support and death), which were statistically significant. [DOI:10.1101/2020.05.27.20115105] Serum urea, CREA, CysC, DBIL, CHE and LDH could be used to distinguish severe COVID-19 cases from mild COVID-19 cases. [DOI:10.1101/2020.03.…	Measured in serum (UN:0001977) as well.
A0021	PRO:PR_000050367	Lactate dehydrogenase (LDH)	increased LDH level	diagnostic	blood (UN:0000178)	14804-9	COVID-19 (DOID:0080600)	gene or protein	LDH and alpha-HBDH may be considerable markers for evaluation of NCOVID-19. [PMID:32161968] C-reactive protein, serum amyloid A, interleukin-6, lactate dehydrogenase, neutrophil-to-lymphocyte ratio, D-dimer, cardiac troponin, and renal biomarkers showed significantly higher levels in patients with severe complications of COVID-19 infection compared to their non-severe counterparts. [PMID:32475810]
A0021	PRO:PR_000050367	Lactate dehydrogenase (LDH)	increased LDH level	prognostic	blood (UN:0000178)	14804-9	COVID-19 (DOID:0080600)	gene or protein	As would be anticipated, elevation is LDH is common in COVID-19 patients in the ICU setting and indicates a poor outcome. [PMID:32311826] Biomarkers that predict the mortality of individual patients more than 10 days in advance with more than 90% accuracy: lactic dehydrogenase (LDH), lymphocyte and high-sensitivity C-reactive protein (hs-CRP). [DOI:10.1038/s42256-020-0180-7] The combinations of t…
A0022	CO:CL_0000771	Eosinophil (EOSI)	decreased EOSI count	diagnostic	blood (UN:0000178)	26449-9	COVID-19 (DOID:0080600)	cell	Detailed clinical investigation of 140 hospitalized COVID-19 cases suggests eosinopenia together with lymphopenia may be a potential indicator for diagnosis. [PMID:32077115]
A0022	CO:CL_0000771	Eosinophil (EOSI)	decreased EOSI count	prognostic	blood (UN:0000178)	26449-9	COVID-19 (DOID:0080600)	cell	The combination of eosinopenia and elevated hs-CRP can effectively triage suspected COVID-19 patients from other patients attending the fever clinic with COVID-19-like initial symptoms. [PMID:32368728] Dynamic surveillance of peripheral blood system especially eosinophils is helpful in the diagnosis, assess the prognosis and prediction of severe COVID-19 cases. [DOI:10.21203/rs.3.rs-34268/v1]
A0022	CO:CL_0000771	Eosinophil (EOSI)	decreased EOSI count	monitoring	blood (UN:0000178)	26449-9	COVID-19 (DOID:0080600)	cell	Severe cases tend to have lower lymphocytes counts, higher leukocyte counts and neutrophil-lymphocyte-ratio (NLR), as well as lower percentages of monocytes, eosinophils, and basophils. Most of severe cases demonstrated elevated levels of infection-related biomarkers and inflammatory cytokines. The number of T cells significantly decreased, and more hampered in severe cases. Both helper T cells a…
A0026	UPKB:Q03405	Soluble urokinase plasminogen activator receptor (PLAUR)	increased PLAUR level	monitoring	blood (UN:0000178)	17204-9	COVID-19 (DOID:0080600)	gene or protein	A low suPAR level (<4.75 ng/ml) at baseline is a useful biomarker for aiding clinical decisions including discharge of patients presenting with symptoms of COVID-19. [DOI:10.1101/2020.05.27.20114678] Findings suggest that suPAR may early trace patients who need intensified management probably in need of anti-inflammatory treatment. [DOI:10.1186/s13054-020-02897-4]	Measured in serum (UN:0001977) and plasma (UN:0001969) as well.
A0026	UPKB:Q03405	Soluble urokinase plasminogen activator receptor (PLAUR)	increased PLAUR level	prognostic	blood (UN:0000178)	17204-9	COVID-19 (DOID:0080600)	gene or protein	In conclusion, suPAR seems extremely promising as a COVID-19 prognostic marker and may assist in the early selection of patients who can stay at home or must be admitted to the hospital and/or intensive care unit. In this difficult outbreak, humanity must use all the available weapons, and suPAR may prove a powerful triage biomarker. [PMID:32613288] A low suPAR level (<4.75 ng/ml) at baseline is …	Measured in serum (UN:0001977) and plasma (UN:0001969) as well.
A0027	PRO:PR_000050392	Presepsin (P-SEP)	increased P-SEP level	prognostic	blood (UN:0000178)	NA	COVID-19 (DOID:0080600)	gene or protein	These findings suggest that P-SEP may correlate with lung damage caused by COVID-19 pneumonia and may be useful as a prognostic biomarker for severe COVID-19. Because P-SEP can predict aggravation of ARDS based on laboratory tests on admission, this enables clinicians to identify high-risk COVID-19 patients and determine treatment at an early stage. [PMID:32530491]	Measured in serum (UN:0001977) as well.
A0028	UPKB:P01375	Tumor necrosis factor alpha (TNF)	increased TNF level	prognostic	blood (UN:0000178)	3074-02-01	COVID-19 (DOID:0080600)	gene or protein	The prevalence of severe and complicated cases of COVID-19 is lower in patients in treatment with anti-TNF-alpha than that reported for patients taking steroids. [PMID:32382744] COVID-19 is associated with high levels of IL-6, TNF-a, IL-1b, and CXCL8/IL-8. Furthermore, elevated TNF-a, known to contribute to organ damage, was also a strong predictor of poor outcome. [PMID:32511562]	Measured in serum (UN:0001977) as well.
A0028	UPKB:P01375	Tumor necrosis factor alpha (TNF)	increased TNF level	monitoring	blood (UN:0000178)	3074-02-01	COVID-19 (DOID:0080600)	gene or protein	Comparison between ICU and non-ICU patients showed that plasma concentrations of IL2, IL7, IL10, GCSF, IP10, MCP1, MIP1A, and TNF alpha were higher in ICU patients than non-ICU patients. [PMID:31986264] IL-2, IL-7, IL-10, G-CSF, IP10, MCP1, MIP1A, TNF alpha were higher in severe patients. [PMID:32222466]	Measured in plasma (UN:0001969) as well.
A0029	NA	Cardiac troponin (TNN)	increased TNN level	prognostic	blood (UN:0000178)	89575-5	COVID-19 (DOID:0080600)	gene or protein	Cardiac biomarkers add prognostic value to the determination of the severity of COVID-19 and can predict mortality. [PMID:32702736] C-reactive protein, serum amyloid A, interleukin-6, lactate dehydrogenase, neutrophil-to-lymphocyte ratio, D-dimer, cardiac troponin, and renal biomarkers showed significantly higher levels in patients with severe complications of COVID-19 infection compared to their…
A0030	UPKB:O15393	Transmembrane protease serine 2 (TMPRSS2)	increased TMPRSS2 level	prognostic	blood (UN:0000178)	NA	COVID-19 (DOID:0080600)	gene or protein	The role of transmembrane protease serine 2 (TMPRSS2) as a contributing factor to the more severe outcomes noted for COVID-19. Validated TMPRSS2 SNPs that are confirmed to be predictive biomarkers can be incorporated in the CDCs current list of clinical biomarkers for disease severity as discussed above. [PMID:32437018]
A0031	UPKB:Q9BYF1	Angiotensin-converting enzyme 2 (ACE2)	increased ACE2 level	monitoring	blood (UN:0000178)	NA	COVID-19 (DOID:0080600)	gene or protein	sACE2 levels showed reliable associations with all individuals components of Metabolic Syndrome. This profile of associations was statistically significantly stronger in men, compared to women, and suggests that preexisting cardiometabolic conditions might confer increased severity of symptoms in some COVID-19 patients through increased expression of ACE2 in the liver. [PMID:32698840]	Measured in plasma (UN:0001969) as well.
A0031	UPKB:Q9BYF1	Angiotensin-converting enzyme 2 (ACE2)	decreased ACE2 level	prognostic	blood (UN:0000178)	NA	COVID-19 (DOID:0080600)	gene or protein	Expression of ACE2 decreased in vivo and in vitro after SARS-CoV infection. Tumor tissues may be more susceptible to SARS-CoV-2 infection in COVID-19 patients with UCEC (Uterine Corpus Endometrial Carcinoma) and KIRP (Kidney Renal Papillary Cell Carcinoma), which may worsen the prognosis. [PMID:32339157]
A0032	UPKB:Q14508	WAP four-disulfide core domain protein 2 (WFDC2)	increased WFDC2 level	monitoring	blood (UN:0000178)	55180-4	COVID-19 (DOID:0080600)	gene or protein	Increases in levels of Human epididymis protein 4 (HE4), Cytokeratin-19 fragment (CYFRA21-1) Carcinoembryonic antigen (CEA), Carbohydrate antigen 125 (CA125), Carbohydrate antigen 153 (CA153), Squamous cell carcinoma antigen (SCC), Carbohydrate antigen 199 (CA199). There were positive associations between levels of C-reactive protein and levels of HE4 (R= 0.631, p<0.001), CYFRA21-1 (R= 0.431, p<0…	Measured in serum (UN:0001977) as well.
A0032	UPKB:Q14508	WAP four-disulfide core domain protein 2 (WFDC2)	increased WFDC2 level	prognostic	blood (UN:0000178)	55180-4	COVID-19 (DOID:0080600)	gene or protein	Significant increases in levels of human epididymis protein 4 (HE4), cytokeratin-19 fragment (CYFRA21-1), carcinoembryonic antigen (CEA), carbohydrate antigens (CA) 125 , and 153. Squamous cell carcinoma antigen (SCC) and CA199 increased significantly. [PMID:32347972] Presence of elevated HE4 levels shown as predictor of COVID-19 severity. [PMID:32347972]	Measured in serum (UN:0001977) as well.
A0033	UPKB:P08727	Cytokeratin-19 fragment (KRT19)	increased KRT19 level	monitoring	blood (UN:0000178)	NA	COVID-19 (DOID:0080600)	gene or protein	Increases in levels of Human epididymis protein 4 (HE4), Cytokeratin-19 fragment (CYFRA21-1) Carcinoembryonic antigen (CEA), Carbohydrate antigen 125 (CA125), Carbohydrate antigen 153 (CA153), Squamous cell carcinoma antigen (SCC), Carbohydrate antigen 199 (CA199). There were positive associations between levels of C-reactive protein and levels of HE4 (R= 0.631, p<0.001), CYFRA21-1 (R= 0.431, p<0…	Measured in serum (UN:0001977) as well.
A0033	UPKB:P08727	Cytokeratin-19 fragment (KRT19)	increased KRT19 level	prognostic	blood (UN:0000178)	NA	COVID-19 (DOID:0080600)	gene or protein	In short, we concluded that the concentrations of tumor biomarkers of CEA, CYFRA21-1, NSE, SCCA, ProGRP were elevated in COVID-19 patients, and that CEA, CYFRA21-1, SCCA could predict the clinical outcome of COVID-19 patients. [PMID:32504736] Significant increases in levels of human epididymis protein 4 (HE4), cytokeratin-19 fragment (CYFRA21-1), carcinoembryonic antigen (CEA), carbohydrate antig…	Measured in serum (UN:0001977) and plasma (UN:0001969) as well.
A0034	UPKB:P06731	Carcinoembryonic antigen (CEACAM5)	increased CEACAM5 level	monitoring	blood (UN:0000178)	19166-8	COVID-19 (DOID:0080600)	gene or protein	Increases in levels of Human epididymis protein 4 (HE4), Cytokeratin-19 fragment (CYFRA21-1) Carcinoembryonic antigen (CEA), Carbohydrate antigen 125 (CA125), Carbohydrate antigen 153 (CA153), Squamous cell carcinoma antigen (SCC), Carbohydrate antigen 199 (CA199). There were positive associations between levels of C-reactive protein and levels of HE4 (R= 0.631, p<0.001), CYFRA21-1 (R= 0.431, p<0…	Measured in serum (UN:0001977) and plasma (UN:0001969) as well.
A0034	UPKB:P06731	Carcinoembryonic antigen (CEACAM5)	increased CEACAM5 level	prognostic	blood (UN:0000178)	19166-8	COVID-19 (DOID:0080600)	gene or protein	In short, we concluded that the concentrations of tumor biomarkers of CEA, CYFRA21-1, NSE, SCCA, ProGRP were elevated in COVID-19 patients, and that CEA, CYFRA21-1, SCCA could predict the clinical outcome of COVID-19 patients. [PMID:32504736] Significant increases in levels of human epididymis protein 4 (HE4), cytokeratin-19 fragment (CYFRA21-1), carcinoembryonic antigen (CEA), carbohydrate antig…	Measured in serum (UN:0001977) and plasma (UN:0001969) as well.
A0035	UPKB:Q8WXI7	Mucin-16 (MUC16)	increased MUC16 level	monitoring	blood (UN:0000178)	10334-1	COVID-19 (DOID:0080600)	gene or protein	Increases in levels of Human epididymis protein 4 (HE4), Cytokeratin-19 fragment (CYFRA21-1) Carcinoembryonic antigen (CEA), Carbohydrate antigen 125 (CA125), Carbohydrate antigen 153 (CA153), Squamous cell carcinoma antigen (SCC), Carbohydrate antigen 199 (CA199) There were positive associations between levels of C-reactive protein and levels of HE4 (R= 0.631, p<0.001), CYFRA21-1(R= 0.431, p<0.0…	Measured in serum (UN:0001977) as well.
A0035	UPKB:Q8WXI7	Mucin-16 (MUC16)	increased MUC16 level	prognostic	blood (UN:0000178)	10334-1	COVID-19 (DOID:0080600)	gene or protein	Presence of elevated CA125 levels shown as predictor of COVID-19 severity. [PMID:32347972] Significant increases in levels of human epididymis protein 4 (HE4), cytokeratin-19 fragment (CYFRA21-1), carcinoembryonic antigen (CEA), carbohydrate antigens (CA) 125 , and 153. Squamous cell carcinoma antigen (SCC) and CA199 increased significantly. [PMID:32347972]	Measured in serum (UN:0001977) as well.
A0036	UPKB:P15941	Mucin-1 (MUC1)	increased MUC1 level	monitoring	blood (UN:0000178)	NA	COVID-19 (DOID:0080600)	gene or protein	KL-6 was also signicantly higher in severe-cases, but its mean was below the cut-off level for ILDs. [DOI:10.21203/rs.3.rs-29567/v1] Increases in levels of Human epididymis protein 4 (HE4), Cytokeratin-19 fragment (CYFRA21-1) Carcinoembryonic antigen (CEA), Carbohydrate antigen 125 (CA125), Carbohydrate antigen 153 (CA153), Squamous cell carcinoma antigen (SCC), Carbohydrate antigen 199 (CA199). …	Measured in serum (UN:0001977) as well. Synonym: CA153, KL-6
A0036	UPKB:P15941	Mucin-1 (MUC1)	increased MUC1 level	prognostic	blood (UN:0000178)	NA	COVID-19 (DOID:0080600)	gene or protein	Irregular levels of KL-6 present maybe helpful for phenotyping patients according to disease severity. [PMID:32470148] Significant increases in levels of human epididymis protein 4 (HE4), cytokeratin-19 fragment (CYFRA21-1), carcinoembryonic antigen (CEA), carbohydrate antigens (CA) 125 , and 153 Squamous cell carcinoma antigen (SCC) and CA199 increased significantly. [PMID:32347972]	Measured in serum (UN:0001977) as well. Synonym: CA153, KL-6
A0037	UPKB:Q15020	Squamous cell carcinoma antigen (SART3)	increased SART3 level	monitoring	blood (UN:0000178)	19207-0	COVID-19 (DOID:0080600)	gene or protein	In addition, the significant differences of plasma level of CEA, CYFRA21- 1 and SCCA were observed among the subgroups of severity of disease and clinical outcome (Table 1) and plasma level of CEA, CYFRA21-1, SCCA were significantly increased with the advance serverity of disease. [PMID:32504736] Additional cancer biomarkers such as carcinoembryonic antigen (CEA), carbohydrate antigens 125 and 15…	Measured in serum (UN:0001977) and plasma (UN:0001969) as well.
A0037	UPKB:Q15020	Squamous cell carcinoma antigen (SART3)	increased SART3 level	prognostic	blood (UN:0000178)	19207-0	COVID-19 (DOID:0080600)	gene or protein	In short, we concluded that the concentrations of tumor biomarkers of CEA, CYFRA21-1, NSE, SCCA, ProGRP were elevated in COVID-19 patients, and that CEA, CYFRA21-1, SCCA could predict the clinical outcome of COVID-19 patients. [PMID:32504736] Significant increases in levels of human epididymis protein 4 (HE4), cytokeratin-19 fragment (CYFRA21-1), carcinoembryonic antigen (CEA), carbohydrate antig…	Measured in serum (UN:0001977) and plasma (UN:0001969) as well.
A0038	PCCID:643993	Carbohydrate antigen 199 (CA199)	increased CA199 level	monitoring	blood (UN:0000178)	NA	COVID-19 (DOID:0080600)	gene or protein	Increases in levels of Human epididymis protein 4 (HE4), Cytokeratin-19 fragment (CYFRA21-1) Carcinoembryonic antigen (CEA), Carbohydrate antigen 125 (CA125), Carbohydrate antigen 153 (CA153), Squamous cell carcinoma antigen (SCC), Carbohydrate antigen 199 (CA199). There were positive associations between levels of C-reactive protein and levels of HE4 (R= 0.631, p<0.001), CYFRA21-1(R= 0.431, p<0.…	Measured in serum (UN:0001977) as well.
A0038	PCCID:643993	Carbohydrate antigen 199 (CA199)	increased CA199 level	prognostic	blood (UN:0000178)	NA	COVID-19 (DOID:0080600)	gene or protein	Significant increases in levels of human epididymis protein 4 (HE4), cytokeratin-19 fragment (CYFRA21-1), carcinoembryonic antigen (CEA), carbohydrate antigens (CA) 125 , and 153. Squamous cell carcinoma antigen (SCC) and CA199 increased significantly. [PMID:32347972]	Measured in serum (UN:0001977) as well.
A0041	UPKB:P01579	Interferon gamma (IFNG)	increased IFNG level	monitoring	blood (UN:0000178)	12729-0	COVID-19 (DOID:0080600)	gene or protein	We noted that patients infected with 2019-nCoV also had high amounts of IL1B, IFN gamma, IP10, and MCP1, probably leading to activated T-helper-1 (Th1) cell responses. Initial plasma IL1B concentrations were higher in both ICU patients and non-ICU patients than in healthy adults. [PMID:31986264]	Measured in serum (UN:0001977) and plasma (UN:0001969) as well.
A0042	UPKB:P13500	Monocyte chemoattractant protein 1 (CCL2)	increased CCL2 level	monitoring	blood (UN:0000178)	NA	COVID-19 (DOID:0080600)	gene or protein	Elevated levels of pro-inflammatory cytokines were present in patients with severe COVID19. IL-6 and MCP-1 were inversely correlated with P/F with the largest AUC in ROC analyses and should be further explored as biomarkers to identify patients at risk for severe RF and as targets for improved treatment strategies. [DOI:10.21203/rs.3.rs-39162/v1] We noted that patients infected with 2019-nCoV als…	Measured in plasma (UN:0001969) as well.
A0043	UPKB:P09919	Granulocyte colony-stimulating factor (CSF3)	increased CSF3 level	monitoring	blood (UN:0000178)	54458-5	COVID-19 (DOID:0080600)	gene or protein	Comparison between ICU and non-ICU patients showed that plasma concentrations of IL2, IL7, IL10, GCSF, IP10, MCP1, MIP1A, and TNF alpha were higher in ICU patients than non-ICU patients. [PMID:31986264] IL-2, IL-7, IL-10, G-CSF, IP10, MCP1, MIP1A, TNF alpha were higher in severe patients. [PMID:32222466]	Measured in plasma (UN:0001969) as well.
A0044	UPKB:P10147	Macrophage inflammatory protein 1-alpha (CCL3)	increased CCL3 level	monitoring	blood (UN:0000178)	NA	COVID-19 (DOID:0080600)	gene or protein	Comparison between ICU and non-ICU patients showed that plasma concentrations of IL2, IL7, IL10, GCSF, IP10, MCP1, MIP1A, and TNF alpha were higher in ICU patients than non-ICU patients. [PMID:31986264] IL-2, IL-7, IL-10, G-CSF, IP10, MCP1, MIP1A, TNF alpha were higher in severe patients. [PMID:32222466]	Measured in plasma (UN:0001969) as well.
A0045	UPKB:P05112	Interleukin-4 (IL4)	increased IL4 level	monitoring	blood (UN:0000178)	27161-9	COVID-19 (DOID:0080600)	gene or protein	2019-nCoV infection also initiated increased secretion of T-helper-2 (Th2) cytokines (eg, IL4 and IL10) that suppress inflammation, which differs from SARS-CoV infection. [PMID:32222466]	Measured in plasma (UN:0001969) as well.
A0046	UPKB:P22301	Interleukin-10 (IL10)	increased IL10 level	monitoring	blood (UN:0000178)	26848-2	COVID-19 (DOID:0080600)	gene or protein	Comparison between ICU and non-ICU patients showed that plasma concentrations of IL2, IL7, IL10, GCSF, IP10, MCP1, MIP1A, and TNF alpha were higher in ICU patients than non-ICU patients. Compared with non-ICU patients, ICU patients had higher plasma levels of IL2, IL7, IL10, GSCF, IP10, MCP1, MIP1A, and TNF alpha. [PMID:31986264] IL-2, IL-7, IL-10, G-CSF, IP10, MCP1, MIP1A, TNF alpha were higher …	Measured in plasma (UN:0001969) as well.
A0047	PCCID:588	Creatinine (CREA)	increased CREA level	monitoring	blood (UN:0000178)	38483-4	COVID-19 (DOID:0080600)	metabolite	A larger study of 701 patients revealed that elevated serum creatinine levels on admission correlated with severity due to significant abnormalities in the coagulation pathway. [PMID:32475810] We found that patients with elevated baseline serum creatinine were more likely to be admitted to the intensive care unit and to undergo mechanical ventilation. [PMID:32247631] Serum urea, CREA, CysC, DBIL,…	Measured in serum (UN:0001977) as well.
A0048	PCCID:1176	Urea (UREA)	increased UREA level	monitoring	blood (UN:0000178)	22664-7	COVID-19 (DOID:0080600)	metabolite	Univariate Cox regression analysis found elevated creatinine levels was also associated with in-hospital mortality (HR 2.99, 95% CI: 2.00, 4.47). Proteinuria, haematuria and elevated urea levels had similar, if not larger, hazard ratios. [PMID:32475810] Serum urea, CREA, CysC, DBIL, CHE and LDH could be used to distinguish severe COVID-19 cases from mild COVID-19 cases . [DOI:10.1101/2020.03.19.2…	Measured in serum (UN:0001977) as well.
A0048	PCCID:1176	Urea (UREA)	increased UREA level	prognostic	blood (UN:0000178)	22664-7	COVID-19 (DOID:0080600)	metabolite	Other consistently reported markers in non-survivors are increased procalcitonin (PCT) and IL-6 levels, as well as increased serum urea, creatinine, cystatin C, direct bilirubin, and cholinesterase. [PMID:32505227] We found that old age, and higher serum lactate dehydrogenase, C-reactive protein, the coefficient of variation of red blood cell distribution width, blood urea nitrogen, direct biliru…	Measured in serum (UN:0001977) as well.
A0049	UPKB:P01034	Cystatin C (CST3)	increased CST3 level	prognostic	blood (UN:0000178)	33863-2	COVID-19 (DOID:0080600)	gene or protein	Other consistently reported markers in non-survivors are increased procalcitonin (PCT) and IL-6 levels, as well as increased serum urea, creatinine, cystatin C, direct bilirubin, and cholinesterase. [PMID:32505227]
A0049	UPKB:P01034	Cystatin C (CST3)	increased CST3 level	monitoring	blood (UN:0000178)	33863-2	COVID-19 (DOID:0080600)	gene or protein	Serum urea, CREA, CysC, DBIL, CHE and LDH could be used to distinguish severe COVID-19 cases from mild COVID-19 cases. [DOI:10.1101/2020.03.19.20034447]	Measured in serum (UN:0001977) as well.
A0050	PCCID:5280352	Direct bilirubin (DBIL)	increased DBIL level	monitoring	blood (UN:0000178)	35672-5	COVID-19 (DOID:0080600)	metabolite	We found that old age, and higher serum lactate dehydrogenase, C-reactive protein, the coefficient of variation of red blood cell distribution width, blood urea nitrogen, direct bilirubin, lower albumin, are associated with severe COVID-19. [PMID:32296824] Serum urea, CREA, CysC, DBIL, CHE and LDH could be used to distinguish severe COVID-19 cases from mild COVID-19 cases. [DOI:10.1101/2020.03.19…	Measured in serum (UN:0001977) as well.
A0051	UPKB:P06276	Cholinesterase (BCHE)	increased BCHE level	monitoring	blood (UN:0000178)	11154-2	COVID-19 (DOID:0080600)	gene or protein	Serum urea, CREA, CysC, DBIL, CHE and LDH could be used to distinguish severe COVID-19 cases from mild COVID-19 cases . [DOI:10.1101/2020.03.19.20034447]	Measured in serum (UN:0001977) as well.
A0051	UPKB:P06276	Cholinesterase (BCHE)	increased BCHE level	prognostic	blood (UN:0000178)	11154-2	COVID-19 (DOID:0080600)	gene or protein	Other consistently reported markers in non-survivors are increased procalcitonin (PCT) and IL-6 levels, as well as increased serum urea, creatinine, cystatin C, direct bilirubin, and cholinesterase. [PMID:32505227]
A0052	UPKB:P02768	Albumin (ALB)	decreased ALB level	prognostic	blood (UN:0000178)	35706-1	COVID-19 (DOID:0080600)	gene or protein	The combinations of the hypoalbuminemia, lymphopenia, and high concentrations of CRP and LDH in 2019-nCoV infected patients upon hospital admission may predict more severe acute lung injury. [PMID:32048163] Decreased albumin (p <0.001), and increased lactate dehydrogenase (LDH) (p <0.001) at admission were significantly associated with severe and critical disease conditions (Table 3). [PMID:32304…	Measured in serum (UN:0001977) and plasma (UN:0001969) as well.
A0053	PDB:2ERJ	Interleukin-2 receptor (IL-2R)	increased IL-2R level	monitoring	blood (UN:0000178)	76039-7	COVID-19 (DOID:0080600)	gene or protein	With following parameters such as age >67.5 years, IL2R >793.5U/mL, CRP >30.7ng/mL, ferroprotein >ug/L, WBC>9.5*10^9/L or NC >7.305*10^9/L, the progress of COVID-19 to critical stage should be closely observed and possibly prevented. [DOI:10.1101/2020.02.25.20025643]
A0054	NA	Ferroprotein (FERRO)	increased FERRO level	monitoring	blood (UN:0000178)	NA	COVID-19 (DOID:0080600)	gene or protein	With following parameters such as age >67.5 years, IL2R >793.5U/mL, CRP >30.7ng/mL, ferroprotein >ug/L, WBC>9.5*10^9/L or NC >7.305*10^9/L, the progress of COVID-19 to critical stage should be closely observed and possibly prevented. [DOI:10.1101/2020.02.25.20025643]
A0055	CO:CL_0000775	Neutrophil (NEUT)	increased NEUT count	monitoring	blood (UN:0000178)	21418-9	COVID-19 (DOID:0080600)	cell	With following parameters such as age >67.5 years, IL2R >793.5U/mL, CRP >30.7ng/mL, ferroprotein >ug/L, WBC>9.5*10^9/L or NC >7.305*10^9/L, the progress of COVID-19 to critical stage should be closely observed and possibly prevented. [DOI:10.1101/2020.02.25.20025643]
A0055	CO:CL_0000775	Neutrophil (NEUT)	increased NEUT count	prognostic	blood (UN:0000178)	21418-9	COVID-19 (DOID:0080600)	cell	In this study, the most important finding was that the neutrophil count, lymphocyte count and platelet count were independent risk factors for predicting the development of severe illness in COVID-19 patients. [PMID:32352397]
A0056	CO:CL_0000576	Monocyte (MONO)	decreased MONO count	monitoring	blood (UN:0000178)	26484-6	COVID-19 (DOID:0080600)	cell	Severe cases tend to have lower lymphocytes counts, higher leukocyte counts and neutrophil-lymphocyte-ratio (NLR), as well as lower percentages of monocytes, eosinophils, and basophils. Most of severe cases demonstrated elevated levels of infection-related biomarkers and inflammatory cytokines. The number of T cells significantly decreased, and more hampered in severe cases. Both helper T cells a…
A0057	CO:CL_0000767	Basophil (BASO)	decreased BASO count	monitoring	blood (UN:0000178)	26444-0	COVID-19 (DOID:0080600)	cell	Severe cases tend to have lower lymphocytes counts, higher leukocyte counts and neutrophil-lymphocyte-ratio (NLR), as well as lower percentages of monocytes, eosinophils, and basophils. Most of severe cases demonstrated elevated levels of infection-related biomarkers and inflammatory cytokines. The number of T cells significantly decreased, and more hampered in severe cases. Both helper T cells a…
A0058	CO:CL_0000912	Helper T cell (TH)	decreased TH count	monitoring	blood (UN:0000178)	65758-5	COVID-19 (DOID:0080600)	cell	Severe cases tend to have lower lymphocytes counts, higher leukocyte counts and neutrophil-lymphocyte-ratio (NLR), as well as lower percentages of monocytes, eosinophils, and basophils. Most of severe cases demonstrated elevated levels of infection-related biomarkers and inflammatory cytokines. The number of T cells significantly decreased, and more hampered in severe cases. Both helper T cells a…
A0060	CO:CL_0000898	Naive Th cell (NTH)	increased NTH count	monitoring	blood (UN:0000178)	80720-6	COVID-19 (DOID:0080600)	cell	Severe cases tend to have lower lymphocytes counts, higher leukocyte counts and neutrophil-lymphocyte-ratio (NLR), as well as lower percentages of monocytes, eosinophils, and basophils. Most of severe cases demonstrated elevated levels of infection-related biomarkers and inflammatory cytokines. The number of T cells significantly decreased, and more hampered in severe cases. Both helper T cells a…
A0061	CO:CL_0000813	Memory Th cell (MTH)	decreased MTH count	monitoring	blood (UN:0000178)	NA	COVID-19 (DOID:0080600)	cell	Severe cases tend to have lower lymphocytes counts, higher leukocyte counts and neutrophil-lymphocyte-ratio (NLR), as well as lower percentages of monocytes, eosinophils, and basophils. Most of severe cases demonstrated elevated levels of infection-related biomarkers and inflammatory cytokines. The number of T cells significantly decreased, and more hampered in severe cases. Both helper T cells a…
A0062	CO:CL_0000815	Regulatory T cell (TREG)	decreased TREG count	monitoring	blood (UN:0000178)	90413-6	COVID-19 (DOID:0080600)	cell	Severe cases tend to have lower lymphocytes counts, higher leukocyte counts and neutrophil-lymphocyte-ratio (NLR), as well as lower percentages of monocytes, eosinophils, and basophils. Most of severe cases demonstrated elevated levels of infection-related biomarkers and inflammatory cytokines. The number of T cells significantly decreased, and more hampered in severe cases. Both helper T cells a…
A0062	CO:CL_0000815	Regulatory T cell (TREG)	decreased TREG count	monitoring	blood (UN:0000178)	14135-8	COVID-19 (DOID:0080600)	cell	Severe cases tend to have lower lymphocytes counts, higher leukocyte counts and neutrophil-lymphocyte-ratio (NLR), as well as lower percentages of monocytes, eosinophils, and basophils. Most of severe cases demonstrated elevated levels of infection-related biomarkers and inflammatory cytokines. The number of T cells significantly decreased, and more hampered in severe cases. Both helper T cells a…
A0063	NCIt:C74611	Erythrocyte sedimentation rate (ESR)	increased ESR	predictive	blood (UN:0000178)	30341-2	COVID-19 (DOID:0080600)	cell	Erythrocyte sedimentation rate (ESR) (R=0.55, p < .01) was positively associated with CT severity scores. To sum up, we can conclude from the analysis of published studies that hematological (lymphocyte count, neutrophil count, and NLR), inflammatory (CRP, ESR, IL-6), and especially biochemical (D-dimer, Troponins, CK) parameters correlate with severe prognosis or exitus in COVID-19 patients and …
A0064	UPKB:P10145	Interleukin-8 (IL8)	increased IL8 level	monitoring	blood (UN:0000178)	33211-4	COVID-19 (DOID:0080600)	gene or protein	COVID-19 is associated with high levels of [IL-6, TNF-a, IL-1b, and CXCL8/IL-8]. We found that high serum IL-6, IL-8, and TNF alpha levels at the time of hospitalization were strong and independent predictors of patient survival. [PMID:32511562]	Measured in serum (UN:0001977) as well.
A0065	UPKB:P19429	Cardiac troponin I (TNNI3)	increased TNNI3 level	monitoring	blood (UN:0000178)	10839-9	COVID-19 (DOID:0080600)	gene or protein	cTnI values are significantly increased in patients with severe SARS-CoV-2 infection compared to those with milder forms of disease. It is hence reasonable to hypothesize that initial measurement of cardiac damage biomarkers immediately after hospitalization for SARS-CoV-2 infection, as well as longitudinal monitoring during hospital stay, may help identifying a subset of patients with possible c…
A0065	UPKB:P19429	Cardiac troponin I (TNNI3)	increased TNNI3 level	prognostic	blood (UN:0000178)	10839-9	COVID-19 (DOID:0080600)	gene or protein	A retrospective study performed in China of patients with confirmed COVID-19 based on SARS-CoV-2 RNA detection, revealed a univariable odds ratio for death at 80.1 (95% CI 10.3-620.4, p<0.0001) for hs-TnI. Another study of 416 hospitalised patients with COVID-19 reported that hs-TnI was elevated in 1 in 5 patients on presentation. [PMID:32475810] In a cohort of 191 patients with confirmed COVID-1…
A0066	PCCID:5462222	Potassium (K+)	decreased K+ level	diagnostic	urine (UN:0001088)	51720-1	COVID-19 (DOID:0080600)	metabolite	Hypokalemia is prevailing in patients with COVID-19. The end of urine K+ loss indicates a good prognosis and may be a reliable, in-time, and sensitive biomarker directly reflecting the end of adverse effect on RAS system. [DOI:10.1101/2020.02.27.20028530]
A0066	PCCID:5462222	Potassium (K+)	decreased K+ level	prognostic	blood (UN:0000178)	51720-1	COVID-19 (DOID:0080600)	metabolomic	Hypokalemia is prevailing in patients with COVID-19. The correction of hypokalemia is challenging because of continuous renal K+ loss resulting from the degradation of ACE2. [DOI:10.1101/2020.02.27.20028530]
A0069	UPKB:P01008	Antithrombin (SERPINC1)	decreased SERPINC1 level	prognostic	blood (UN:0000178)	20991-6	COVID-19 (DOID:0080600)	gene or protein	Compared with healthy controls, the AT values were found to be lower in COVID-19 patients (85% vs. 99%; p<0.001). [PMID:32172226] The correlation between AT reduction to clinical outcomes can be extrapolated from studies in sepsis where this association has already been well established. [https://doi.org/10.1016/j.blre.2020.100731]
A0070	PCCID:439199	Fibrin degradation product (FDP)	increased FDP level	prognostic	blood (UN:0000178)	29263-1	COVID-19 (DOID:0080600)	gene or protein	FDP (33.83 vs. 1.55 mg/L; p<0.001) were higher in patients with SARS-CoV-2 than those in controls. [PMID:32172226] Non-survivors revealed significantly higher D-dimer and fibrin degradation product (FDP) levels, longer prothrombin time and activated partial thromboplastin time. [PMID:32073213]
A0071	PDB:3GHG	Fibrinogen (FIB)	increased FIB level	prognostic	blood (UN:0000178)	30009-5	COVID-19 (DOID:0080600)	gene or protein	FIB values in SARS-CoV-2 patients were also higher than those in the control group (5.02 vs. 2.90 g/L; p<0.001). [PMID:32172226]
A0071	PDB:3GHG	Fibrinogen (FIB)	increased FIB level	monitoring	blood (UN:0000178)	30009-5	COVID-19 (DOID:0080600)	gene or protein	Fibrinogen levels were shown to be much higher in patients with severe COVID-19 patients. [PMID:32367765]
A0072	NA	CT score (CTS)	increased CTS	prognostic	lung (UN:0002048)	NA	COVID-19 (DOID:0080600)	image	CT score is positively correlated with age, inflammatory biomarkers, severity of clinical categories, and disease phases. A CT score >/=18 has shown to be highly predictive of patient's mortality in short-term follow-up. [PMID:32623505] Quantitative CT may have potential in assessing the severity of COVID-19 pneumonia on admission. [PMID:32346594]
A0073	NCIt:C180931	Neutrophil extracellular trap (NET)	increased NET level	prognostic	blood (UN:0000178)	NA	COVID-19 (DOID:0080600)	DNA	We now report that sera from patients with COVID-19 (n=50 patients, n=84 samples) have elevated levels of cell-free DNA, myeloperoxidase (MPO)-DNA, and citrullinated histone H3 (Cit-H3); the latter two are highly specific markers of NETs. In summary, these data reveal high levels of NETs in many patients with COVID-19, where they may contribute to cytokine release and respiratory failure. [PMID:3…	Measured in serum (UN:0001977) as well.
A0073	NCIt:C180931	Neutrophil extracellular trap (NET)	increased NET level	diagnostic	blood (UN:0000178)	NA	COVID-19 (DOID:0080600)	DNA	In summary, these data reveal high levels of NETs in many patients with COVID-19, where they may contribute to cytokine release and respiratory failure. [PMID:32511633]	Measured in serum (UN:0001977) as well.
A0074	NA	Myeloperoxidase-DNA (MPO-DNA)	increased MPO-DNA level	diagnostic	blood (UN:0000178)	NA	COVID-19 (DOID:0080600)	DNA	We now report that sera from patients with COVID-19 (n=50 patients, n=84 samples) have elevated levels of cell-free DNA, myeloperoxidase (MPO)-DNA, and citrullinated histone H3 (Cit-H3); the latter two are highly specific markers of NETs. In summary, these data reveal high levels of NETs in many patients with COVID-19, where they may contribute to cytokine release and respiratory failure. [PMID:3…	Measured in serum (UN:0001977) as well.
A0075	PRO:PR_000050386	Citrullinated histone H3 (CIT-H3)	increased CIT-H3 level	prognostic	blood (UN:0000178)	NA	COVID-19 (DOID:0080600)	gene or protein	We now report that sera from patients with COVID-19 (n=50 patients, n=84 samples) have elevated levels of cell-free DNA, myeloperoxidase (MPO)-DNA, and citrullinated histone H3 (Cit-H3); the latter two are highly specific markers of NETs. In summary, these data reveal high levels of NETs in many patients with COVID-19, where they may contribute to cytokine release and respiratory failure. [PMID:3…	Measured in serum (UN:0001977) as well.
A0075	PRO:PR_000050386	Citrullinated histone H3 (CIT-H3)	increased CIT-H3 level	diagnostic	blood (UN:0000178)	NA	COVID-19 (DOID:0080600)	gene or protein	Cit-H3 associated strongly with platelet levels. In summary, these data reveal high levels of NETs in many patients with COVID-19, where they may contribute to cytokine release and respiratory failure. [PMID:32511633]	Measured in serum (UN:0001977) as well.
A0076	NA	Ground-glass opacity (GGO)	presence of GGO	diagnostic	lung (UN:0002048)	NA	COVID-19 (DOID:0080600)	image	The typical feature was multiple lobular ground-glass opacity and subsegmental areas of consolidation in COVID-19 patients. CT scan may be a reliable test for screening COVID-19 cases. [PMID:32161968] We identified a simple, reliable, and accurate COVID-19 diagnostic and prognostic imaging biomarker obtained from CTA lung apices: the presence or absence of ground-glass opacification. [DOI:10.3174…	Cartoid CTA scan|Apical ground-glass opacification
A0077	PRO:PR_000050341	Alanine aminotransferase (ALT)	increased ALT level	monitoring	blood (UN:0000178)	76625-3	COVID-19 (DOID:0080600)	gene or protein	Alanine aminotransferase is present at increased level in COVID-19 patients with severe disease and as such may be useful to monitor in patients admitted to the ICU. [PMID:32311826] Liver enzymes including ALT and AST are useful biomarkers of hepatic dysfunction in COVID-19 patients. Most liver diseases initially cause mild symptoms, but they must be detected early. [PMID:32669866] Liver dysfunct…
A0078	UPKB:P14210	Hepatocyte growth factor (HGF)	increased HGF level	prognostic	blood (UN:0000178)	79394-3	COVID-19 (DOID:0080600)	gene or protein	The accuracy of classification of severe case was also the highest when using HGF. Thus, HGF was ultimately used as the biomarker to discriminate severe from nonsevere COVID-19 patients. [DOI:10.1101/2020.05.31.20118315]	Measured in serum (UN:0001977) as well.
A0078	UPKB:P14210	Hepatocyte growth factor (HGF)	Increased HGF level	monitoring	blood (UN:0000178)	79394-3	COVID-19 (DOID:0080600)	gene or protein	Hepatocyte growth factor (HGF) classified severe from nonsevere COVID-19 patients with a sensitivity of 84.6% and a specificity of 97.9% under a cutoff value of 1128 pg/ml. The level of this cytokine did not increase in nonsevere patients but was significantly elevated in severe patients. Considering its potent antiinflammatory function, we suggest that HGF might be a new candidate therapy for cr…	Measured in serum (UN:0001977) as well.
A0079	UPKB:P17174	Aspartate aminotransferase (GOT1)	increased GOT1 level	monitoring	blood (UN:0000178)	NA	COVID-19 (DOID:0080600)	gene or protein	AST is strongly associated with mortality risk compared to other parameters. Significant elevation in liver enzymes (alanine aminotransferase (ALT) and aspartate aminotransferase (AST)) is associated with critical changes in renal function parameters (blood urea nitrogen, creatinine) and coagulation markers. [PMID:32503382] High troponin I levels with either advanced age more than 60 years or ele…
A0079	UPKB:P17174	Aspartate aminotransferase (GOT1)	increased GOT1 level	prognostic	blood (UN:0000178)	NA	COVID-19 (DOID:0080600)	gene or protein	Compared to non-severe patients, severe patients showed significant suppression of lymphocyte count and monocyte count, as well as increase of CRP and AST. [PMID:32492406] Combined with significant elevations in liver enzymes (alanine aminotransferase and aspartate aminotransferase), renal biomarkers (blood urea nitrogen, creatinine), and coagulation measures, a picture of MOF becomes very appare…	Measured in serum (UN:0001977) as well.
A0080	PRO:PR_000050361	Creatine kinase (CK)	increased CK level	prognostic	blood (UN:0000178)	2157-06-01	COVID-19 (DOID:0080600)	gene or protein	COVID-19 patients typically present increased levels of biomarkers of muscle injury, namely creatine-kinase (CK) and myoglobin. However, the alterations of such biomarkers could be the result of several clinical conditions, including kidney dysfunction and cardiac injury, or a direct effect of the SARS-CoV-2, which can also infect cells of the muscle tissue due to the expression of the ACE2 recep…
A0080	PRO:PR_000050361	Creatine kinase (CK)	increased CK level	monitoring	blood (UN:0000178)	2157-06-01	COVID-19 (DOID:0080600)	gene or protein	In keeping with this observation, 138 patients with COVID-19, who were admitted to an intensive care unit, showed a tendency toward increased creatine kinase levels. [PMID:32247631] Age, comorbidities, lymphocytopenia and elevated alanine aminotransferase, d-dimer, creatine kinase, high-sensitivity cardiac troponin I, prothrombin time, and disease severity were reported to be associated with inte…	Measured in serum (UN:0001977) as well.
A0081	PCCID:5360545	Sodium (Na+)	decreased Na+ level	monitoring	blood (UN:0000178)	2947-0	COVID-19 (DOID:0080600)	metabolite	Interestingly, a large proportion of patients had sodium and calcium levels below the reference range on admission (28.7% and 20.6%, respectively). Hong et al. [15] recently reported similar findings, where 50% of COVID-19 patients they examined had hyponatremia and hypokalemia and they suggested there was a correlation with the degree of renal injury in those patients. [PMID:32766546] A total of…
A0082	PCCID:9750	Plasma citrulline (CIT)	decreased CIT level	monitoring	blood (UN:0000178)	2129-05-01	COVID-19 (DOID:0080600)	metabolite	In our cohort study, we showed that a majority of patients with moderate to severe COVID-19 had decreased levels of plasma citrulline, which correlated with digestive symptoms and systemic inflammation. Low citrulline is likely involved in SARS-CoV-2-associated diarrhea by causing alteration of intestinal permeability and enterocyte malabsorption. It could also participate in the significant weig…	Measured in plasma (UN:0001969) as well.
A0084	PRO:PR_000050356	Creatine kinase MB (CK-MB)	increased CK-MB level	monitoring	blood (UN:0000178)	20569-0	COVID-19 (DOID:0080600)	gene or protein	Besides radiographic presentations, variables that were associated significantly with severity of COVID-19 were decreased lymphocytes, elevated body temperature, and high levels of procalcitonin, D-dimer, and creatine kinase MB. [DOI:10.1016/S1473-3099(20)30198-5]	Measured in serum (UN:0001977) as well.
A0084	PRO:PR_000050356	Creatine kinase MB (CK-MB)	increased CK-MB level	prognostic	blood (UN:0000178)	20569-0	COVID-19 (DOID:0080600)	gene or protein	A meta-analysis which included 4189 confirmed patients of COVID-19 from 28 studies pointed out that cardiac injury biomarkers rose above normal by the midpoint of hospitalization and spiked immediately before death, which seemed to be the most seen in severe cases. [PMID:32596365]
A0085	UPKB:P51649	Alpha-hydroxybutyric dehydrogenase (ALDH5A1)	increased ALDH5A1 level	diagnostic	blood (UN:0000178)	1677-4	COVID-19 (DOID:0080600)	gene or protein	LDH and alpha-HBDH may be considerable markers for evaluation of NCOVID-19. [PMID:32161968]
A0085	UPKB:P51649	Alpha-hydroxybutyric dehydrogenase (ALDH5A1)	increased ALDH5A1 level	prognostic	blood (UN:0000178)	1677-4	COVID-19 (DOID:0080600)	gene or protein	This study reveals that the heart is also a major target of COVID-19 infection, and myocardial enzyme spectrum assays could help the diagnosis, prognosis and guide the treatments to prevent heart failure in COVID-19 patients. [DOI:https://doi.org/10.21203/rs.3.rs-23849/v1] We noted significantly increased cTnI, CK, HBDB and LDH levels in very severe group as compare to severe. [PMID:32209382]	Measured in serum (UN:0001977) as well.
A0086	UPKB:P09603	Macrophage colony-stimulating factor 1 (CSF1)	increased CSF1 level	prognostic	blood (UN:0000178)	17106-6	COVID-19 (DOID:0080600)	gene or protein	Three cytokines, M-CSF, IL-8 and SCF, which were clustered into 3 different correlation groups and had relatively small fluctuations during SARS-CoV-2 infection, were selected for the construction of a multiclass classification model. This model discriminated healthy individuals and asymptomatic and nonsevere patients with accuracy of 77.4% but was not successful in classifying severe patients. […	Measured in serum (UN:0001977) as well.
A0087	UPKB:P21583	Stem cell factor (KITLG)	increased KITLG level	prognostic	blood (UN:0000178)	NA	COVID-19 (DOID:0080600)	gene or protein	SCF were significantly higher in fatal than severe and/or mild COVID-19 patients. The temporal changes of the identified CCGFs may serve as biomarkers for prognosis of COVID-19 patients. [PMID:32561706] Regulatory DCs (regDCs) play an important role in controlling immune homeostasis and can possess an immunosuppressive ability to induce specific immune tolerance and dampen Th2 type inflammation. …
A0088	PCCID:5280352	Bilirubin (BIL)	increased BIL level	prognostic	blood (UN:0000178)	33898-8	COVID-19 (DOID:0080600)	metabolite	Increased levels of total bilirubin have been shown to distinguish between COVID-19 patients admitted to the ICU vs those with less severe disease. [PMID:32311826] Other consistently reported markers in non-survivors are increased procalcitonin (PCT) and IL-6 levels, as well as increased serum urea, creatinine, cystatin C, direct bilirubin, and cholinesterase. [PMID:32505227]
A0089	NCIt:C38462	Activated partial thromboplastin time (APTT)	prolonged APTT	prognostic	blood (UN:0000178)	3173-02-01	COVID-19 (DOID:0080600)	gene or protein|phospholipid	Activated partial thromboplastin time (aPTT)-based clot waveform analysis (CWA) is a form of global haemostatic assay. In conclusion, the rise of CWA (clot waveform analysis) parameters precedes and coincides with ICU admission. COVID-19 patients requiring intensive care unit (ICU) support exhibit haemostatic disturbances and interrogated their aPTT-based CWA parameters as surrogates of their hae…
A0090	NCIt:C62656	Prothrombin time (PT)	prolonged PT	prognostic	blood (UN:0000178)	5894-01-01	COVID-19 (DOID:0080600)	gene or protein	The nonsurvivors demonstrated significantly higher D-dimer and FDP levels, and longer PT and APTT compared to survivors on admission. [PMID:32311826] Non-survivors revealed significantly higher D-dimer and fibrin degradation product (FDP) levels, longer prothrombin time and activated partial thromboplastin time. [PMID:32073213]
A0091	UPKB:P02776	Platelet factor 4 (PF4)	decreased PF4 level	prognostic	blood (UN:0000178)	6002-0	COVID-19 (DOID:0080600)	gene or protein	In a proteomic investigation of sera in SARS patients, decreasing PF4 was found to be associated with poor prognosis which is in consistent with our findings in COVID-19. [PMID:32492406]	Measured in serum (UN:0001977) as well.
A0092	UPKB:Q01844	RNA-binding protein EWS (EWSR1)	increased EWSR1 level	prognostic	blood (UN:0000178)	NA	COVID-19 (DOID:0080600)	gene or protein	Best baseline predictors of respiratory failure were suPAR with an AUC (95% CI) of 0.88 (0.80-0.95), EWS 0.84 (0.75-0.93), LDH 0.82 (0.71-0.93), and CRP 0.80 (0.70-0.89). [DOI:10.1101/2020.05.27.20114678]
A0093	UPKB:O15123	Angiopoietin-2 gene (ANGPT2)	increased ANGPT2 level	prognostic	blood (UN:0000178)	NA	COVID-19 (DOID:0080600)	gene or protein	Angiopoietin-2 is a relevant predictive factor for ICU direct admission in COVID-19 patients. This result showing an endothelial activation reinforces the hypothesis of a COVID-19-associated microvascular dysfunction. [PMID:32458111]	Measured in plasma (UN:0001969) as well.
A0095	UPKB:Q8IWL2	Surfactant protein A (SFTPA1)	increased SFTPA1 level	prognostic	blood (UN:0000178)	NA	COVID-19 (DOID:0080600)	gene or protein	Serum SP-A and SP-D levels were significantly higher in severe cases than in non severe cases. Additionally, SP-A was higher in non-severe cases than in healthy subjects. We propose that serum SP-A and SP-D level might be useful as biomarkers of COVID-19 pneumonia severity. [DOI:10.21203/rs.3.rs-29567/v1]	Measured in serum (UN:0001977) as well.
A0096	UPKB:P35247	Surfactant protein D (SFTPD)	increased SFTPD level	prognostic	blood (UN:0000178)	74541-4	COVID-19 (DOID:0080600)	gene or protein	Serum SP-A and SP-D levels were significantly higher in severe cases than in non severe cases. Additionally, SP-A was higher in non-severe cases than in healthy subjects. We propose that serum SP-A and SP-D level might be useful as biomarkers of COVID-19 pneumonia severity. [DOI:10.21203/rs.3.rs-29567/v1]	Measured in serum (UN:0001977) as well.
A0097	UPKB:P09104	Neuron-specific enolase (ENO2)	increased ENO2 level	prognostic	blood (UN:0000178)	19193-2	COVID-19 (DOID:0080600)	gene or protein	In short, we concluded that the concentrations of tumor biomarkers of CEA, CYFRA21-1, NSE, SCCA, ProGRP were elevated in COVID-19 patients, and that CEA, CYFRA21-1, SCCA could predicte the clinical outcome of COVID-19 patients. [PMID:32504736] Presence of elevated NSE levels shown as predictor of COVID-19 severity. [PMID:32347972]	Measured in plasma (UN:0001969) as well.
A0098	PRO:PR_000050383	Progastrin releasing peptide (PROGRP)	increased PROGRP level	prognostic	blood (UN:0000178)	NA	COVID-19 (DOID:0080600)	gene or protein	In short, we concluded that the concentrations of tumor biomarkers of CEA, CYFRA21-1, NSE, SCCA, ProGRP were elevated in COVID-19 patients, and that CEA, CYFRA21-1, SCCA could predicte the clinical outcome of COVID-19 patients. [PMID:32504736]	Measured in plasma (UN:0001969) as well.
A0099	NCIt:C60832	Oxygen saturation (SaO2)	decreased SaO2 level	prognostic	blood (UN:0000178)	2713-06-01	COVID-19 (DOID:0080600)	chemical element	Oxygen saturation (SaO2) was found as another candidate marker of progressive severity. The fact that it was so tightly associated to hospitalization or even death in our model is unsurprising, because a low SaO2 is one of the main criteria for the definition of a severe case. [PMID:32471703]
A0101	UPKB:O43915	Vascular endothelial growth factor D (VEGF-D)	increased VEGF-D level	prognostic	blood (UN:0000178)	82911-9	COVID-19 (DOID:0080600)	gene or protein	VEGF-D was identified as the most important indicator related to the severity of COVID-19. [PMID:32576222] Initial plasma VEGF concentrations were higher in both ICU patients and non-ICU patients than in healthy adults. [PMID:31986264]	Measured in serum (UN:0001977) and plasma (UN:0001969) as well.
A0102	UPKB:Q06187	Bruton tyrosine kinase (BTK)	increased BTK level	prognostic	blood (UN:0000178)	75708-8	COVID-19 (DOID:0080600)	gene or protein	Analysis revealed significantly elevated BTK activity, as evidenced by autophosphorylation, and increased IL-6 production. [PMID:32503877]
A0102	UPKB:Q06187	Bruton tyrosine kinase (BTK)	increased BTK level	monitoring	blood (UN:0000178)	75708-8	COVID-19 (DOID:0080600)	gene or protein	In contrast, Bruton tyrosine kinase inhibitors, such as ibrutinib and acalabrutinib, may actually have some protective effect. [PMID:32388230]
A0103	UPKB:P02144	Myoglobin (MB)	increased MB level	prognostic	blood (UN:0000178)	2639-03-01	COVID-19 (DOID:0080600)	gene or protein	An increased concentration of myoglobin was associated with an increased risk of hospitalization mortality in non-survivors with NCIP. In conclusion, our study provides important documentation that in this single-center, an elevated serum concentration of myoglobin (>/=306.5 ug/L) is associated with an increased risk of hospitalization mortality in non-survivor with NCIP, independent of elevation…	Measured in serum (UN:0001977) as well.
A0103	UPKB:P02144	Myoglobin (MB)	increased MB level	monitoring	blood (UN:0000178)	2639-03-01	COVID-19 (DOID:0080600)	gene or protein	The severity of COVID-19 is associated with acute cardiac injury, and acute cardiac injury is associated with death. Cardiac injury biomarkers mainly increase in non-survivors. This highlights the need to effectively monitor heart health to prevent myocarditis in patients infected with COVID-19. [PMID:32305557]
A0105	PDB:3B75	Glycosylated hemoglobin (HBA1C)	increased HBA1C level	prognostic	blood (UN:0000178)	4548-04-01	COVID-19 (DOID:0080600)	gene or protein	High HbA1c level is associated with inflammation, hypercoagulability, and low SaO2 in COVID-19 patients, and the mortality rate (27.7%) is higher in patients with diabetes. Determining HbA1c level after hospital admission is thus helpful assessing inflammation, hypercoagulability, and prognosis of COVID-19 patients. [PMID:32416121]
A0106	UPKB:Q8NHJ6	Leukocyte immunoglobulin like receptor B4 (LILRB4)	increased LILRB4 level	prognostic	blood (UN:0000178)	NA	COVID-19 (DOID:0080600)	gene or protein	Increased expression of LILRB4 was associated with increased disease severity in this study, suggesting a possible decrease in monocyte activation leading to an immune suppressive microenvironment. LILRB4 represents a compelling target to investigate COVID343 19 treatment. [DOI:10.1101/2020.06.22.20137216]
A0109	PRO:PR_000050252	Immunoglobulin G (IGG)	increased IGG level	diagnostic	blood (UN:0000178)	2465-03-01	COVID-19 (DOID:0080600)	gene or protein	IgM and IgG immunogenic epitopes of SARS-CoV-2 proteins were profiled in the serum of ten COVID-19 patients. Such epitope biomarkers provide insight into the immune response to COVID-19 and are potential targets for COVID-19 diagnosis and vaccine development. [DOI:10.1101/2020.03.26.994756]
A0110	PRO:PR_000050257	Immunoglobulin M (IGM)	increased IGM level	diagnostic	blood (UN:0000178)	2472-09-01	COVID-19 (DOID:0080600)	gene or protein	IgM and IgG immunogenic epitopes of SARS-CoV-2 proteins were profiled in the serum of ten COVID-19 patients. Such epitope biomarkers provide insight into the immune response to COVID-19 and are potential targets for COVID-19 diagnosis and vaccine development. [DOI:10.1101/2020.03.26.994756]
A0111	PCCID:7762	Ethyl butanoate (EB)	increased EB level	diagnostic	gas in respiratory system (UN:0034947)	NA	COVID-19 (DOID:0080600)	metabolite	Higher levels of ethyl butanoate were detected in exhaled breath of COVID-19 patients. breath-borne butyraldehyde and isopropanol were significantly higher for non-COVID-19 respiratory infections. [DOI:10.1101/2020.06.21.20136523]
A0112	PCCID:261	Butyraldehyde (BA)	decreased BA level	diagnostic	gas in respiratory system (UN:0034947)	NA	COVID-19 (DOID:0080600)	metabolite	Higher levels of ethyl butanoate were detected in exhaled breath of COVID-19 patients. breath-borne butyraldehyde and isopropanol were significantly higher for non-COVID-19 respiratory infections. [DOI:10.1101/2020.06.21.20136523]
A0113	PCCID:3776	Isopropanol (IP)	decreased IP level	diagnostic	gas in respiratory system (UN:0034947)	32084-6	COVID-19 (DOID:0080600)	metabolite	Higher levels of ethyl butanoate were detected in exhaled breath of COVID-19 patients. breath-borne butyraldehyde and isopropanol were significantly higher for non-COVID-19 respiratory infections. [DOI:10.1101/2020.06.21.20136523]
A0115	NA	Oxygen-saturated hemoglobin fraction (SpO2)	decreased SpO2 level	monitoring	blood (UN:0000178)	59406-9	COVID-19 (DOID:0080600)	chemical element	Hypoxemia was independently associated with in-hospital mortality. Patients with SpO2 values less than 90% despite oxygen supplementation, in whom there is a particularly high mortality risk, may be more likely to benefit from experimental therapies such as investigational drugs and antibody drug therapy. [PMID:32376101]
A0116	UPKB:Q9BZZ2	Sialoadhesin (SIGLEC1)	increased SIGLEC1 level	diagnostic	blood (UN:0000178)	NA	COVID-19 (DOID:0080600)	gene or protein	mCD169 could predict SARS-CoV-2 infection at hospital admission during the outbreak. This biomarker could be relevant for triage and rapid therapeutic decision in patients suspected of acute viral infections since mCD169 can be overexpressed in other infections responsible of outbreaks such as influenza or dengue fever. [PMID:33206973]	Measured in plasma (UN:0001969) as well.
A0117	UPKB:P04275	von Willebrand factor (VWF)	increased VWF level	monitoring	blood (UN:0000178)	41867-3	COVID-19 (DOID:0080600)	gene or protein	We also show that critical illness is associated with further elevations in VWF, as well as increases in soluble P-selectin and sCD40L when compared with controls. Together, these results provide biochemical evidence that endotheliopathy and platelet activation are ubiquitous in COVID-19-associated coagulopathy and might play key roles in the progression of disease. [PMID:32619411]	Measured in plasma (UN:0001969) as well.
A0118	UPKB:P16109	P-selectin (SELP)	increased SELP level	prognostic	blood (UN:0000178)	17181-9	COVID-19 (DOID:0080600)	gene or protein	Biomarkers of platelet activity and vascular health are significantly associated with the composite outcome of thrombosis or death in hospitalized patients with COVID-19. P-selectin and sCD40L contribute to thrombosis by supporting platelet-myeloid heteroaggregate formation and thrombi stability by interaction with PSGL-1 and alpha IIb beta3, respectively. [PMID:32757722]	Measured in plasma (UN:0001969) as well.
A0118	UPKB:P16109	P-selectin (SELP)	increased SELP level	monitoring	blood (UN:0000178)	17181-9	COVID-19 (DOID:0080600)	gene or protein	We also show that critical illness is associated with further elevations in VWF, as well as increases in soluble P-selectin and sCD40L when compared with controls. Together, these results provide biochemical evidence that endotheliopathy and platelet activation are ubiquitous in COVID-19-associated coagulopathy and might play key roles in the progression of disease. [PMID:32619411]	Measured in plasma (UN:0001969) as well.
A0119	UPKB:P29965	CD40 ligand (CD40LG)	increased CD40LG level	monitoring	blood (UN:0000178)	NA	COVID-19 (DOID:0080600)	gene or protein	We also show that critical illness is associated with further elevations in VWF, as well as increases in soluble P-selectin and sCD40L when compared with controls. Together, these results provide biochemical evidence that endotheliopathy and platelet activation are ubiquitous in COVID-19-associated coagulopathy and might play key roles in the progression of disease. [PMID:32619411]	Measured in plasma (UN:0001969) as well.
A0119	UPKB:P29965	CD40 ligand (CD40LG)	increased CD40LG level	prognostic	blood (UN:0000178)	NA	COVID-19 (DOID:0080600)	gene or protein	Biomarkers of platelet activity and vascular health are significantly associated with the composite outcome of thrombosis or death in hospitalized patients with COVID-19. P-selectin and sCD40L contribute to thrombosis by supporting platelet-myeloid heteroaggregate formation and thrombi stability by interaction with PSGL-1 and alpha IIb beta3, respectively. [PMID:32757722]	Measured in plasma (UN:0001969) as well.
A0120	UPKB:P07204	Thrombomodulin (THBD)	increased THBD level	diagnostic	blood (UN:0000178)	NA	COVID-19 (DOID:0080600)	gene or protein	In all patients, soluble thrombomodulin concentrations greater than 3.26 ng/mL were associated with lower rates of hospital discharge (22 [88%] of 25 patients with low concentrations vs 13 [52%] of 25 patients with high concentrations; p=0.0050) and lower likelihood of survival on Kaplan-Meier analysis (hazard ratio 5.9, 95% CI 1.9-18.4; p=0.0087). [PMID:32619411]	Measured in plasma (UN:0001969) as well.
A0121	UPKB:P05305	Endothelin-1 (EDN1)	increased EDN1 level	prognostic	blood (UN:0000178)	NA	COVID-19 (DOID:0080600)	gene or protein	We propose that elevated circulating ET-1 levels might also serve as a prominent biomarker and prognostic tool to identify individuals with the greatest risks of severe COVID-19. [DOI:10.33218/001c.13525]	Measured in plasma (UN:0001969) as well.
A0122	NCIt:C156117	Cell-free DNA (CFDNA)	elevated CFDNA level	diagnostic	blood (UN:0000178)	NA	COVID-19 (DOID:0080600)	DNA	cell-free DNA strongly correlated with absolute neutrophil count. In summary, these data reveal high levels of NETs in many patients with COVID-19, where they may contribute to cytokine release and respiratory failure. [PMID:32511633]
A0123	CHEBI:39026	Oxidized low-density lipoprotein (OXLDL)	decreased OXLDL level	diagnostic	blood (UN:0000178)	NA	COVID-19 (DOID:0080600)	gene or protein	SARS-COV-2 infection caused an LDL decrease to occur in the majority of the mild cases; this could be used, in combination with viral RNA detection, as a potential biomarker to facilitate early diagnosis. Serum cancer biomarkers, including CYFRA21-1 and HE4, can be used to monitor the pathological progression of the disease. [DOI:10.2139/ssrn.3552854]
A0124	NCIt:2697049	Severe acute respiratory syndrome coronavirus 2 (SC2) RNA	increased SC2 level	diagnostic	blood (UN:0000178)	94660-8	COVID-19 (DOID:0080600)	RNA	SARS-COV-2 infection caused an LDL decrease to occur in the majority of the mild cases; this could be used, in combination with viral RNA detection, as a potential biomarker to facilitate early diagnosis. Serum cancer biomarkers, including CYFRA21-1 and HE4, can be used to monitor the pathological progression of the disease. [DOI:10.2139/ssrn.3552854]
A0125	UPKB:P16860	N-terminal pro-brain natriuretic peptide (NPPB)	increased NPPB level	prognostic	blood (UN:0000178)	71425-3	COVID-19 (DOID:0080600)	gene or protein	This meta-analysis showed elevated NT-proBNP level was associated with increased mortality in COVID-19 pneumonia. [PMID:32434874]
A0126	NCIt:C64800	Coefficient of RBC distribution width (RDW)	increased RDW	prognostic	blood (UN:0000178)	NA	COVID-19 (DOID:0080600)	cell	We found that old age, and higher serum lactate dehydrogenase, C-reactive protein, the coefficient of variation of red blood cell distribution width, blood urea nitrogen, direct bilirubin, lower albumin, are associated with severe COVID-19. [PMID:32296824]
A0127	NCIT:C105971	Calprotectin (S100A8/S100A9)	increased S100A8/S100A9 level	monitoring	blood (UN:0000178)	93771-4	COVID-19 (DOID:0080600)	gene or protein	As compared with serum samples from 47 healthy controls, the COVID-19 samples showed markedly higher levels of calprotectin. Calprotectin levels were significantly higher in those individuals who required mechanical ventilation at any point during their hospitalization (n = 32), as compared with those who did not (P < 0.0001, Fig. 2F). We found that high levels of serum calprotectin on day 1 or 2…	Measured in serum (UN:0001977) as well.
A0128	UPKB:P22894	Matrix metalloproteinase-8 (MMP8)	increased MMP8 level	diagnostic	saliva (UN:0001836)	NA	COVID-19 (DOID:0080600)	gene or protein	Periodontitis could be associated with severe COVID-19 infections. According to several studies, the excessive elevation and activation of MMP-8 (aMMP-8) is linked to the progression of periodontitis, which is also reflected in oral fluids. [DOI:10.1016/j.mehy.2020.110276]
A0129	UPKB:Q9Y5Y4	Prostaglandin D2 receptor 2 (PTGDR2)	decreased PTGDR2 level	prognostic	blood (UN:0000178)	NA	COVID-19 (DOID:0080600)	gene or protein	COVID-19 alters the frequency and functional phenotypes of granulocyte subsets with the emergence of CRTH2 as a disease biomarker. [DOI:10.1093/infdis/jiaa591 ]
A0130	UPKB:Q15582	Transforming growth factor-beta-induced protein (TGFBI)	increased TGFBI level	diagnostic	blood (UN:0000178)	NA	COVID-19 (DOID:0080600)	gene or protein	We report a highly reliable severity diagnostic biomarker, acetylated 676th lysine transforming growth factor-beta-induced protein (TGFBIp K676Ac). TGFBIp K676Ac was consistently elevated in the blood of patients with SARS-CoV-2 pneumonia (n = 113), especially in patients in the intensive care unit (ICU) compared to non-ICU patients. [DOI:10.1126/sciadv.abc1564]
A0131	OMX_000077	COVID20 panel	change in distribution of 20 urinary peptides	prognostic	urine (UN:0001088)	NA	COVID-19 (DOID:0080600)	gene or protein	COVID20 is composed of 20 endogenous peptides mainly derived from various collagen chains that enable differentiating moderate or severe disease from critical state or death with 83% sensitivity at 100% specificity. [PMID: 32960510] The 20 peptides are PpGENGKpG (from UPKB:P02461), GDRGEpGpP (from UPKB:B8V7R6), QGAPGERGPP (from UPKB:P08572), YQTNKAKH (from UPKB:P04080), YDGKGVGLGPGP (from UPKB:O4…
A0132	UPKB:P45379	High-sensitivity troponin-T (TNNT2)	increased TNNT2 level	prognostic	blood (UN:0000178)	89575-5	COVID-19 (DOID:0080600)	gene or protein	In patients hospitalized with COVID-19, hs-TnT identifies patients at high risk for adverse in-hospital events, and trends of hs-TnT over time, particularly during the first day, provide additional prognostic information. [PMID: 33003961]
A0133	UPKB:P17931	Galectin-3 (LGALS3)	increased LGALS3 level	prognostic	blood (UN:0000178)	NA	COVID-19 (DOID:0080600)	gene or protein	GAL3 could be a good prognostic marker for severe COVID-19 and that elevated plasma levels of GAL3 can participate in triggering the cytokine storm observed in severe COVID-19 patients. [PMID:32973815]	Measured in plasma (UN:0001969) as well.
A0134	UPKB:P06702	Protein S100A9 (S100A9)	increased S100A9 level	prognostic	blood (UN:0000178)	NA	COVID-19 (DOID:0080600)	gene or protein	Among the most highly increased inflammatory mediators in severe/critically ill patients, S100A9, an alarmin and TLR4 ligand, was found as a noteworthy biomarker, because it inversely correlated with the serum albumin levels. [PMID:32989935]
A0135	UPKB:P07196	Neurofilament light chain (NEFL)	increased NEFL level	prognostic	blood (UN:0000178)	NA	COVID-19 (DOID:0080600)	gene or protein	COVID-19 patients who later developed intensive care unit acquired weakness had significantly higher NfL and GFAp in the early phase of ICU care. [DOI:10.21203/rs.3.rs-78038/v1]	Measured in plasma (UN:0001969) as well.
A0136	UPKB:P14136	Glial fibrillary acidic protein (GFAP)	increased GFAP level	prognostic	blood (UN:0000178)	93424-0	COVID-19 (DOID:0080600)	gene or protein	COVID-19 patients who later developed intensive care unit acquired weakness had significantly higher NfL and GFAp in the early phase of ICU care. [DOI:10.21203/rs.3.rs-78038/v2]	Measured in plasma (UN:0001969) as well.
A0137	CHEBI:28728	Thromboxane B2 (TXB2)	increased TXB2 level	prognostic	blood (UN:0000178)	3012-02-01	COVID-19 (DOID:0080600)	metabolite	Biomarkers of platelet activity and vascular health are significantly associated with the composite outcome of thrombosis or death in hospitalized patients with COVID-19. Increased plasma TxB2 levels indicate the activation of platelets via COX-1. [PMID:32757722]	Measured in plasma (UN:0001969) as well.
A0139	NCIt:C74730	Mean platelet volume (MPV)	increased MPV level	prognostic	blood (UN:0000178)	28542-9	COVID-19 (DOID:0080600)	cell	Biomarkers of platelet activity and vascular health are significantly associated with the composite outcome of thrombosis or death in hospitalized patients with COVID-19. MPV is a biomarker of platelet hyperactivity. [PMID:32757722]	Measured in plasma (UN:0001969) as well.
A0140	UPKB:P01031	Complement C5A (C5)	increased C5 level	prognostic	blood (UN:0000178)	4505-04-01	COVID-19 (DOID:0080600)	gene or protein	We identified elevated levels of plasma C3a and C5a in HD patients with severe COVID-19 compared with controls. Serial sampling identified that C5a levels were elevated prior to clinical deterioration in patients who developed severe disease. C3a more closely mirrored both clinical and biochemical disease severity. [DOI:10.1093/ckj/sfaa192]	Measured in plasma (UN:0001969) as well.
A0141	UPKB:P01024	Complement 3A (C3)	increased C3 level	prognostic	blood (UN:0000178)	NA	COVID-19 (DOID:0080600)	gene or protein	We identified elevated levels of plasma C3a and C5a in HD patients with severe COVID-19 compared with controls. Serial sampling identified that C5a levels were elevated prior to clinical deterioration in patients who developed severe disease. C3a more closely mirrored both clinical and biochemical disease severity. [DOI:10.1093/ckj/sfaa192]	Measured in plasma (UN:0001969) as well.
A0142	UPKB:P78423	Fractalkine (CX3CL1)	increased CX3CL1 level	monitoring	blood (UN:0000178)	NA	COVID-19 (DOID:0080600)	gene or protein	Serum levels of fractalkine, vascular cell adhesion molecule-1 (VCAM-1), intercellular adhesion molecule 1 (ICAM-1), and vascular adhesion protein-1 (VAP-1) were elevated in patients with mild disease, dramatically elevated in severe cases, and decreased in the convalescence phase. [DOI:10.1093/infdis/jiaa349]	Measured in serum (UN:0001977) as well.
A0143	UPKB:P19320	Vascular cell adhesion molecule-1 (VCAM-1)	increased VCAM-1 level	monitoring	blood (UN:0000178)	75627-0	COVID-19 (DOID:0080600)	gene or protein	Serum levels of fractalkine, vascular cell adhesion molecule-1 (VCAM-1), intercellular adhesion molecule 1 (ICAM-1), and vascular adhesion protein-1 (VAP-1) were elevated in patients with mild disease, dramatically elevated in severe cases, and decreased in the convalescence phase. [DOI:10.1093/infdis/jiaa349]	Measured in serum (UN:0001977) as well.
A0144	UPKB:P05362	Intercellular adhesion molecule 1 (ICAM-1)	increased ICAM-1 level	monitoring	blood (UN:0000178)	17174-4	COVID-19 (DOID:0080600)	gene or protein	Serum levels of fractalkine, vascular cell adhesion molecule-1 (VCAM-1), intercellular adhesion molecule 1 (ICAM-1), and vascular adhesion protein-1 (VAP-1) were elevated in patients with mild disease, dramatically elevated in severe cases, and decreased in the convalescence phase. [DOI:10.1093/infdis/jiaa349]	Measured in serum (UN:0001977) as well.
A0145	UPKB:Q16853	Vascular adhesion protein-1 (AOC3)	increased AOC3 level	monitoring	blood (UN:0000178)	NA	COVID-19 (DOID:0080600)	gene or protein	Serum levels of fractalkine, vascular cell adhesion molecule-1 (VCAM-1), intercellular adhesion molecule 1 (ICAM-1), and vascular adhesion protein-1 (VAP-1) were elevated in patients with mild disease, dramatically elevated in severe cases, and decreased in the convalescence phase. [DOI:10.1093/infdis/jiaa349]	Measured in serum (UN:0001977) as well.
A0148	UPKB:P49908	Selenoprotein P (SELENOP)	decreased SELENOP level	prognostic	blood (UN:0000178)	NA	COVID-19 (DOID:0080600)	gene or protein	The Se status was significantly higher in samples from surviving COVID patients as compared with non-survivors (Se; 53.3 +/- 16.2 vs. 40.8 +/- 8.1 ug/L, SELENOP; 3.3 +/- 1.3 vs. 2.1 +/- 0.9 mg/L), recovering with time in survivors while remaining low or even declining in non-survivors. We conclude that Se status analysis in COVID patients provides diagnostic information patients suffering from CO…	Measured in serum (UN:0001977) as well.
A0149	UPKB:Q16552	Interleukin-17A (IL17A)	increased IL17A level	monitoring	blood (UN:0000178)	82334-4	COVID-19 (DOID:0080600)	gene or protein	Levels of VEGF-D, TNF-alpha, SCF, LIF, IL-2, IL-4, IL-6, IL-8, IL-10, IL-15, IL-17A, IL-18, IL-1 beta, and IFN-gamma were significantly higher in the critical group than in the severe group (Table 1). [DOI:10.1186/s13054-020-03079-y]	Measured in serum (UN:0001977) as well.
A0150	UPKB:Q14116	Interleukin-18 (IL18)	increased IL18 level	monitoring	blood (UN:0000178)	33823-6	COVID-19 (DOID:0080600)	gene or protein	Levels of VEGF-D, TNF-alpha, SCF, LIF, IL-2, IL-4, IL-6, IL-8, IL-10, IL-15, IL-17A, IL-18, IL-1 beta, and IFN-gamma were significantly higher in the critical group than in the severe group (Table 1). [DOI:10.1186/s13054-020-03079-y]	Measured in serum (UN:0001977) as well.
A0151	UPKB:P40933	Interleukin-15 (IL15)	increased IL15 level	monitoring	blood (UN:0000178)	NA	COVID-19 (DOID:0080600)	gene or protein	Levels of VEGF-D, TNF-alpha, SCF, LIF, IL-2, IL-4, IL-6, IL-8, IL-10, IL-15, IL-17A, IL-18, IL-1 beta, and IFN-gamma were significantly higher in the critical group than in the severe group (Table 1). [DOI:10.1186/s13054-020-03079-y]	Measured in serum (UN:0001977) as well.
A0445	UPKB:P01584	Interleukin-1 beta protein (IL1B)	increased IL1B level	prognostic	blood (UN:0000178)	13629-1	COVID-19 (DOID:0080600)	gene or protein	COVID-19 is associated with high levels of IL-6, TNF-a, IL-1b, and CXCL8/IL-8. IL-6 was one of the most robust prognostic markers of survival. It remained independently associated with severity and predictive of outcome. Furthermore, elevated TNF-a, known to contribute to organ damage, was also a strong predictor of poor outcome. [PMID:32511562]	Measured in serum (UN:0001977) as well.
A0445	UPKB:P01584	Interleukin-1 beta protein (IL1B)	increased IL1B level	monitoring	blood (UN:0000178)	13629-1	COVID-19 (DOID:0080600)	gene or protein	We noted that patients infected with 2019-nCoV also had high amounts of IL1B, IFN gamma, IP10, and MCP1, probably leading to activated T-helper-1 (Th1) cell responses. Initial plasma IL1B concentrations were higher in both ICU patients and non-ICU patients than in healthy adults. [PMID:31986264]	Measured in serum (UN:0001977) and plasma (UN:0001969) as well.

## Sheet: 9.Heatmap_biomarkers
Gene Symbol	logFC_Rawdata (IPX0002186001)	logFC_Rawdata (IPX0002924001)	logFC_STAVER (IPX0002186001)	logFC_STAVER (IPX0002924001)
SAA1	626.875	82.1716	18.614	10.9138
BCHE	9.54347	0.0637578	18.9313	5.86475
ALB	-15.4513	18.5396	-15.4513	-18.5396
SERPINC1	34.913	-30.1265	-19.5267	-2.26754
PF4	7.33018	-168.615	-4.20453	-4.35131
MB	1.08095	0.0242779	0.265783	0.58173
SIGLEC1	0.145972	0.0459718	3.73218	0.580437
VWF	9.6716	1.86745	3.51165	3.31492
TGFBI	-1.67581	8.60184	2.65443	1.65634
S100A9	92.1544	8.54608	0.581674	0.389194
GFAP	6.29868	3.95797	65.6852	66.7542
C5	65.0213	3.67728	1.91384	1.27053
AOC3	0.952146	-0.223683	1.78074	1.31639
SELENOP	-20.6393	3.5114	-15.7884	-3.04479
S100A8	17.9331	0.478077	0.914619	0.817288

[truncated: 1 more sheets: 10.Biomarkers_P-values]
